# Supplementary material
Source: PubMed Central journal article supplement (PMC10983801)
Supplement: NIHMS1973984-supplement-Supplemental_Information.pdf [file NIHMS1973984-supplement-Supplemental_Information.pdf]

## Contents

|                                                                                                                                        |    |
|----------------------------------------------------------------------------------------------------------------------------------------|----|
| I. Supplemental Methods .....                                                                                                          | 3  |
| 1.1 General Information .....                                                                                                          | 3  |
| 1.2 General Procedures for Substrate Synthesis .....                                                                                   | 4  |
| General Procedure 1 for the Synthesis of Unactivated Alkenes.....                                                                      | 4  |
| General Procedure 2 for the Synthesis of Unactivated Alkenes.....                                                                      | 4  |
| Procedure for the Synthesis of N-(but-3-en-1-yl)benzenesulfonamide .....                                                               | 5  |
| Procedure for the Synthesis of N-(but-3-en-1-yl)-N-methylbenzenesulfonamide.....                                                       | 5  |
| Procedure for the Synthesis of 2-(but-3-en-1-yl)isoindoline-1,3-dione .....                                                            | 5  |
| 1.3 General Procedures for Photocatalytic Hydrofluoroalkylation .....                                                                  | 7  |
| General Procedure A for hydrotrifluoromethylation of alkenes .....                                                                     | 7  |
| General Procedure B for hydrodifluoromethylation of alkenes .....                                                                      | 7  |
| General Procedure C for hydromonofluoromethylation of alkenes .....                                                                    | 8  |
| General Procedure D for hydro(perfluoro)alkylation of alkenes.....                                                                     | 8  |
| II. Supplemental Discussion.....                                                                                                       | 10 |
| 2.1 Optimization of Hydrotrifluoromethylation .....                                                                                    | 10 |
| Supplemental Table 1. Catalyst screening.....                                                                                          | 10 |
| Supplemental Table 2. Catalyst, TFA loading screening .....                                                                            | 11 |
| Supplemental Table 3. HAT reagents comparison in hydrotrifluoromethylation. ....                                                       | 11 |
| Supplemental Table 4. Solvent screening. ....                                                                                          | 12 |
| Supplemental Table 5. Base additive loading screening .....                                                                            | 12 |
| Supplemental Table 6. Control experiments.....                                                                                         | 13 |
| 2.2 Optimization of Hydrodifluoromethylation.....                                                                                      | 13 |
| Supplemental Table 7. Iron catalyst screening.....                                                                                     | 14 |
| Supplemental Table 8. The comparison between TRIP thiol and TRIP disulfide as competent HAT reagents in hydrodifluoromethylation. .... | 14 |
| Supplemental Table 9. Loading of difluoroacetic acid screening .....                                                                   | 15 |
| Supplemental Table 10. Base additive screening .....                                                                                   | 15 |
| Supplemental Table 11. Aryl thiol screening (with pent-4-en-1-yl benzoate as substrate). ....                                          | 16 |
| 2.3 Optimization of Hydromonofluoromethylation .....                                                                                   | 16 |
| Supplemental Table 13. Thiol/disulfide screening. ....                                                                                 | 17 |
| Supplemental Table 14. Catalyst loading screening. ....                                                                                | 17 |
| Supplemental Table 15. Monofluoroacetic acid loading screening. ....                                                                   | 18 |

|                                                                                          |     |
|------------------------------------------------------------------------------------------|-----|
| Supplemental Table 16. Solvent screening. ....                                           | 18  |
| 2.4 Characterization of Corresponding Products .....                                     | 19  |
| 2.5 Relative configuration of compound 72 .....                                          | 43  |
| 2.6 Deuterium labelling and kinetic isotope effect (KIE) studies.....                    | 44  |
| 2.7 Kinetic studies to determine reaction rate law .....                                 | 49  |
| 2.8 Light intensity impact on reaction rate .....                                        | 53  |
| 2.9 Study of the disulfide formation .....                                               | 54  |
| 2.10 TEMPO experiment study.....                                                         | 56  |
| 2.11 Evidence of visible-light induced homolysis of trifluoroacetic acid with iron ..... | 58  |
| 2.12 Mass balance studies of hydrofluoroalkylation of representative examples.....       | 64  |
| III. Supplemental Figure .....                                                           | 76  |
| IV. Supplemental Reference.....                                                          | 374 |

## I. Supplemental Methods

### 1.1 General Information

All reagents were purchased from commercially available sources and used without further purification. All reactions were monitored by either  $^1\text{H}$  NMR or thin layer chromatography (TLC) carried out on 0.25 mm pre-coated silica plates (F-254) purchased from Silicycle, Quebec, Canada, using shortwave UV light as visualizing agent and  $\text{KMnO}_4$  or phosphomolybdic acid (PMA) as developing agents. Flash column chromatography was performed using SiliaFlash-P60 silica gel (40 – 63  $\mu\text{m}$ ) purchased from Silicycle, Quebec, Canada.  $^1\text{H}$ ,  $^{13}\text{C}$  and  $^{19}\text{F}$  NMR spectra were recorded on a Bruker DRX-600 spectrometers operating at 600 MHz for proton nuclei, 151 MHz for carbon nuclei and 565 MHz for fluorine nuclei were calibrated using residual undeuterated solvent as an internal reference ( $\text{CDCl}_3$ : 7.26 ppm  $^1\text{H}$  NMR and 77.00 ppm  $^{13}\text{C}$  NMR). PR160L 390 nm LEDs (25% intensity) from Kessil Lights were used as light source. For reporting NMR peak multiplicities, the following abbreviations were used: s = singlet, d = doublet, t = triplet, q = quartet, quin = quintet, hept = heptet, m = multiplet. High-resolution mass spectra (HRMS) or mass spectra (MS) were recorded on an Agilent UHPLC TOF mass spectrometer using electrospray ionization time-of-flight (ESI-TOF), chemical ionization time-of-flight (CI-TOF), atmospheric pressure chemical ionization (APCI) or gas chromatography–mass spectrometry (GC-MS).

## 1.2 General Procedures for Substrate Synthesis

### General Procedure 1 for the Synthesis of Unactivated Alkenes

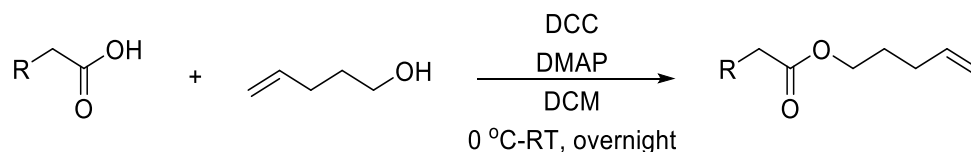

To an RB flask were added 5-pentenol (4.9 mmol, 1.96 equiv), carboxylic acid (2.5 mmol, 1.0 equiv), 4-dimethylamino pyridine (0.24 mmol, 0.097 equiv), and a stir bar. The RB flask was then evacuated and backfilled with nitrogen gas three times. Dry dichloromethane (0.225 M) was added via syringe to the RB flask, dissolving the solid components. The RB flask was then placed in an ice bath positioned on top of a stirring plate. Dicyclohexyl carbodiimide (4.85 mmol, 1.94 mmol) was added to the mixture via syringe dropwise over a period of 5 minutes. The ice bath was then removed, allowing the reaction to return to room temperature. The reaction was left to stir overnight. Following reaction, the mixture was concentrated through rotary evaporation. Subsequent flash column chromatography (hexanes/EtOAc) allowed for isolation of the ester.<sup>1-2</sup>

### General Procedure 2 for the Synthesis of Unactivated Alkenes

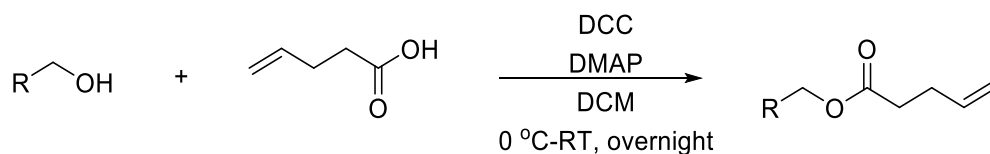

To an RB flask were added 5-pentenoic acid (2.5 mmol, 1.0 equiv), alcohol (4.9 mmol, 1.96 equiv), 4-dimethylamino pyridine (0.24 mmol, 0.097 equiv), and a stir bar. The RB flask was then evacuated and backfilled with nitrogen gas three times. Dry dichloromethane (0.225 M) was added via syringe to the RB flask, dissolving the solid components. The RB flask was then placed in an ice bath positioned on top of a stirring plate. Dicyclohexyl carbodiimide (4.85 mmol, 1.94 mmol) was added to the mixture via syringe dropwise over a period of 5 minutes. The ice bath was then removed, allowing the reaction to return to room temperature. The reaction was left to stir overnight. Following reaction, the mixture was concentrated through rotary evaporation. Subsequent flash column chromatography (hexanes/EtOAc) allowed for isolation of the ester.<sup>1-2</sup>

### Procedure for the Synthesis of *N*-(but-3-en-1-yl)benzenesulfonamide

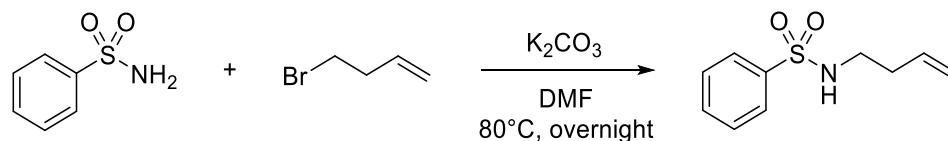

To an RB flask were added benzenesulfonamide (944 mg, 6.0 mmol), 4-bromobut-1-ene (0.8 mL, 6.0 mmol), dimethylformamide (30 mL), and a stir bar. Potassium carbonate (830 mg, 6.0 mmol) was added to the reaction mixture. After stirring overnight at 80 °C, the mixture was cooled to room temperature and quenched with water. The reaction mixture was then washed with brine and extracted with diethyl ether. The organic layer was concentrated through rotary evaporation. Subsequent flash column chromatography (hexanes/EtOAc) (3:1) allowed for isolation of *N*-(but-3-en-1-yl)benzenesulfonamide.<sup>3</sup>

### Procedure for the Synthesis of *N*-(but-3-en-1-yl)-*N*-methylbenzenesulfonamide

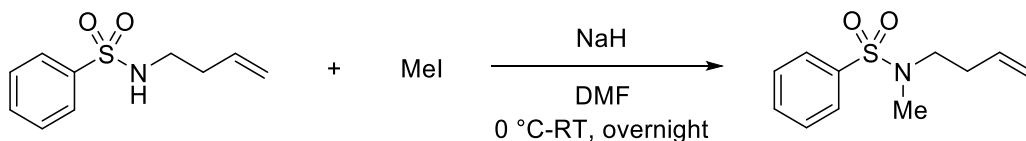

To an RB flask were added sodium hydride (60% in mineral oil, 240 mg, 6 mmol), dimethylformamide (25 mL), a solution of *N*-(but-3-en-1-yl)benzenesulfonamide (1.20 g, 5 mmol) in DMF (5 mL), and a stir bar in an ice bath at 0 °C. The reaction mixture was brought to room temperature and stirred for 30 minutes. The reaction mixture was cooled to 0 °C in an ice bath again, and a solution of methyl iodide (1.06 g, 7.5 mmol) in DMF (5 mL) was added dropwise over a period of 5 minutes by syringe. The reaction mixture was brought to room temperature and left to run overnight. The reaction mixture was quenched with a saturated aqueous solution of sodium bicarbonate. The mixture was then washed with brine and extracted with diethyl ether. The organic phase was dried over sodium sulfate and concentrated through rotary evaporation. Subsequent flash column chromatography (hexanes/EtOAc) (10:1) produced *N*-(but-3-en-1-yl)-*N*-methylbenzenesulfonamide.<sup>4</sup>

### Procedure for the Synthesis of 2-(but-3-en-1-yl)isoindoline-1,3-dione

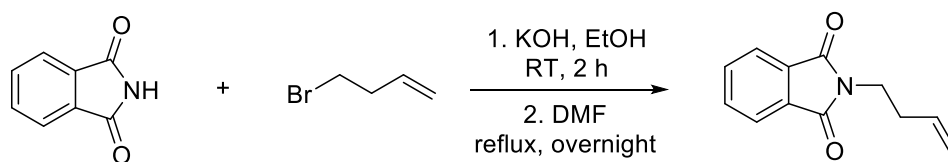

To an RB flask were added phthalimide (1.71 g, 11.6 mmol), potassium hydroxide (0.650 g, 11.6 mmol), ethyl alcohol (20 mL), and a stir bar. The reaction mixture was stirred at room temperature for 2 h and evaporated to remove EtOH. The resulting residue was then dissolved in dimethylformamide (15 mL) and 4-bromobut-1-ene (1.10 mL, 12.8 mmol) was added. The reaction mixture was stirred at reflux overnight. The reaction mixture was cooled, diluted with ethyl acetate, and quenched with saturated sodium bicarbonate. The mixture was then washed with brine. The extracted organic layer was dried over sodium sulfate and concentrated through rotary evaporation. Subsequent flash column chromatography (hexanes/EtOAc) (10:1) produced 2-(but-3-en-1-yl)isoindoline-1,3-dione.<sup>5</sup>

## 1.3 General Procedures for Photocatalytic Hydrofluoroalkylation

### General Procedure A for hydrotrifluoromethylation of alkenes

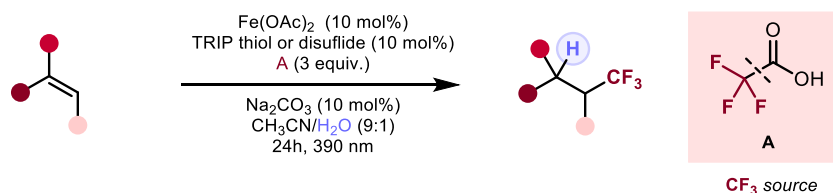

$\text{Fe}(\text{OAc})_2$  (10 mol%, 0.1 equiv.),  $\text{Na}_2\text{CO}_3$  (10 mol%, 0.1 equiv.) and TRIP disulfide (10 mol%, 0.1 equiv.) (in the case using TRIP thiol, HAT reagent was added via syringe after backfilling with  $\text{N}_2$ ) was added in an oven-dried 8-mL test vial containing a Teflon®-coated magnetic stir bar. The vial was evacuated and backfilled with  $\text{N}_2$  (repeated for 4 times), followed by addition of alkenes (0.1 mmol, 1.0 equiv.) and  $\text{CF}_3\text{COOH}$  (0.30 mmol, 3.0 equiv) in  $\text{MeCN}/\text{H}_2\text{O}$  (9:1, 0.1 M in regard to alkenes) via syringe under  $\text{N}_2$ . The reaction mixture was placed under 390nm Kessil® light after sealing the punctured holes of the vial cap with vacuum grease and electric tape/parafilm for better air-tight protection and allowed to react at room temperature for 24 h. Following this, the reaction mixture was filtered through a pad of celite which was subsequently rinsed with DCM. The filtrate was concentrated, and the residue was then purified by flash column chromatography to give the corresponding hydrotrifluoromethylated products.

### General Procedure B for hydrodifluoromethylation of alkenes

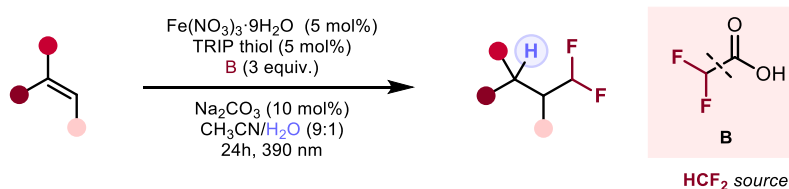

$\text{Fe}(\text{NO}_3)_3 \cdot 9\text{H}_2\text{O}$  (5 mol%, 0.05 equiv.),  $\text{Na}_2\text{CO}_3$  (10 mol%, 0.1 equiv.) was added in an oven-dried 8-mL test vial containing a Teflon®-coated magnetic stir bar. The vial was evacuated and backfilled with  $\text{N}_2$  (repeated for 4 times), followed by addition of alkenes (0.1 mmol, 1.0 equiv.),  $\text{HCF}_2\text{COOH}$  (0.30 mmol, 3.0 equiv) and TRIP thiol (5 mol%, 0.05 equiv.) in  $\text{MeCN}/\text{H}_2\text{O}$  (9:1, 0.1 M in regard to alkenes) via syringe under  $\text{N}_2$ . The reaction mixture was placed under 390nm

Kessil® light after sealing the punctured holes of the vial cap with vacuum grease and electric tape/parafilm for better air-tight protection and allowed to react at room temperature for 24 h. Following this, the reaction mixture was filtered through a pad of celite which was subsequently rinsed with DCM. The filtrate was concentrated, and the residue was then purified by flash column chromatography to give the corresponding hydrodifluoromethylated products.

### General Procedure C for hydromonofluoromethylation of alkenes

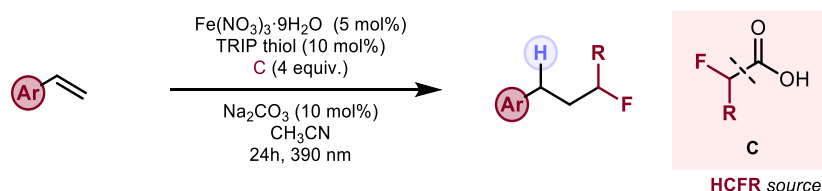

$\text{Fe}(\text{NO}_3)_3 \cdot 9\text{H}_2\text{O}$  (5 mol%, 0.05 equiv.),  $\text{Na}_2\text{CO}_3$  (10 mol%, 0.1 equiv.) was added in an oven-dried 8-mL test vial containing a Teflon®-coated magnetic stir bar. The vial was evacuated and backfilled with  $\text{N}_2$  (repeated for 4 times), followed by addition of alkenes (0.1 mmol, 1.0 equiv.),  $\text{H}_2\text{CFCOOH}$  (0.40 mmol, 4.0 equiv) and TRIP thiol (10 mol%, 0.1 equiv.) in MeCN (0.1 M in regard to alkenes) via syringe under  $\text{N}_2$ . The reaction mixture was placed under 390nm Kessil® light after sealing the punctured holes of the vial cap with vacuum grease and electric tape/parafilm for better air-tight protection and allowed to react at room temperature for 24 h. Following this, the reaction mixture was filtered through a pad of celite which was subsequently rinsed with DCM. The filtrate was concentrated, and the residue was then purified by flash column chromatography to give the corresponding hydromonofluoroalkylated products.

### General Procedure D for hydro(perfluoro)alkylation of alkenes

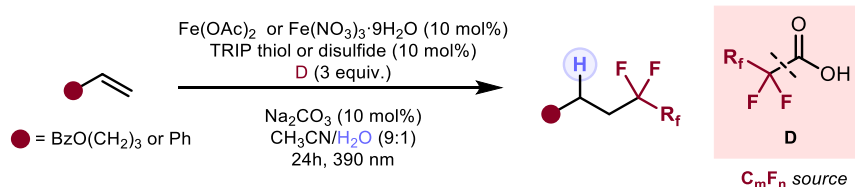

Fe salt (10 mol%, 0.1 equiv.), Na<sub>2</sub>CO<sub>3</sub> (10 mol%, 0.1 equiv.) and TRIP disulfide (10 mol%, 0.1 equiv.) (in the case using TRIP thiol, HAT reagent was added via syringe after backfilling with N<sub>2</sub>) was added in an oven-dried 8-mL test vial containing a Teflon®-coated magnetic stir bar. The vial was evacuated and backfilled with N<sub>2</sub> (repeated for 4 times), followed by addition of alkenes (0.1 mmol, 1.0 equiv.) and (perfluoro)alkyl carboxylic acid (0.30 mmol, 3.0 equiv) in MeCN/H<sub>2</sub>O (9:1, 0.1 M in regard to alkenes) via syringe under N<sub>2</sub>. The reaction mixture was placed under 390nm Kessil® light after sealing the punctured holes of the vial cap with vacuum grease and electric tape/parafilm for better air-tight protection and allowed to react at room temperature for 24 h. Following this, the reaction mixture was filtered through a pad of celite which was subsequently rinsed with DCM. The filtrate was concentrated, and the residue was then purified by flash column chromatography to give the corresponding hydroperfluoroalkylated products.



## II. Supplemental Discussion

### 2.1 Optimization of Hydrotrifluoromethylation

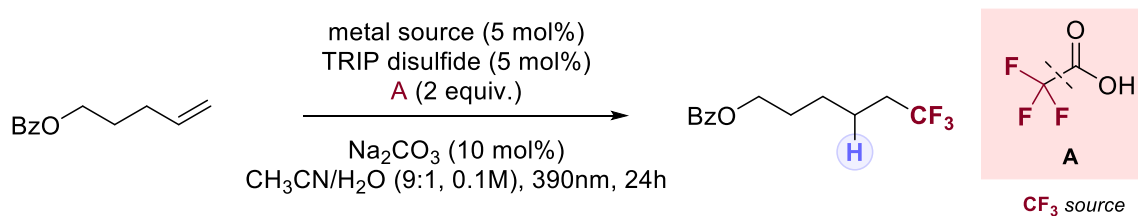

| entry | metal source                                                 | yield           |
|-------|--------------------------------------------------------------|-----------------|
| 1     | Fe(acac) <sub>3</sub>                                        | ND <sup>a</sup> |
| 2     | Fe(NO <sub>3</sub> ) <sub>3</sub> ·9H <sub>2</sub> O         | 32              |
| 3     | FeCl <sub>3</sub> ·6H <sub>2</sub> O                         | 56              |
| 4     | Fe(OTf) <sub>2</sub>                                         | 60              |
| 5     | FeCl <sub>2</sub>                                            | 72              |
| 6     | Fe(OAc) <sub>2</sub>                                         | 68              |
| 7     | Cu(MeCN) <sub>4</sub> BF <sub>4</sub> ; Cu(OTf) <sub>2</sub> | ND <sup>a</sup> |

<sup>a</sup> Almost full recovery of starting material.

**Supplemental Table 1. Catalyst screening.**

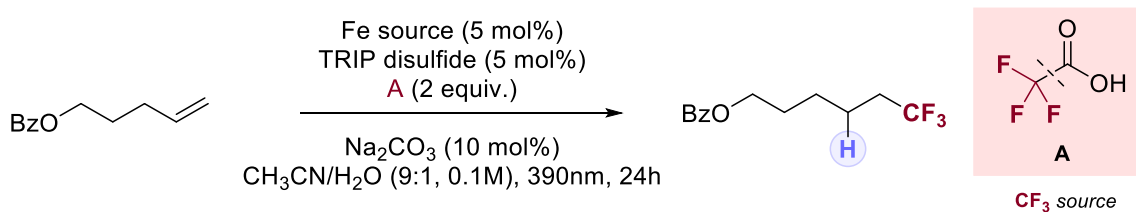

| entry            | [Fe]                 | yield |
|------------------|----------------------|-------|
| a <sub>1</sub>   | FeCl <sub>2</sub>    | 76    |
| a,b <sub>2</sub> | FeCl <sub>2</sub>    | 80    |
| a <sub>3</sub>   | Fe(OAc) <sub>2</sub> | 74    |
| a,b <sub>4</sub> | Fe(OAc) <sub>2</sub> | 92    |

<sup>a</sup>10 mol% of [Fe] and 10 mol% of thiol/disulfide. <sup>b</sup>with 3 equiv. of CF<sub>3</sub>COOH.

### Supplemental Table 2. Catalyst, TFA loading screening.

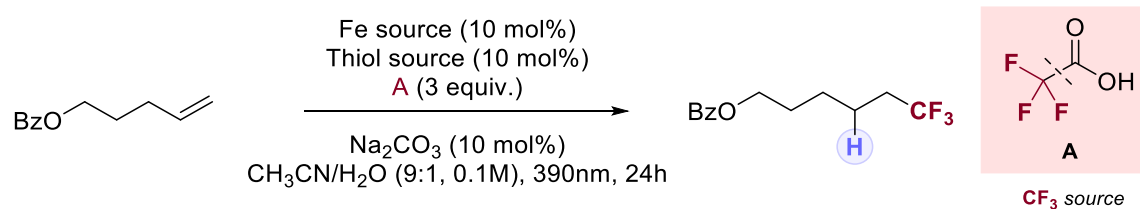

| entry | [Fe]                 | Thiol source   | yield               |
|-------|----------------------|----------------|---------------------|
| 1     | Fe(OAc) <sub>2</sub> | TRIP thiol     | 86(84) <sup>a</sup> |
| 2     | Fe(OAc) <sub>2</sub> | TRIP disulfide | 92(89) <sup>a</sup> |

<sup>a</sup> isolated yield in parentheses.

### Supplemental Table 3. HAT reagents comparison in hydrotrifluoromethylation.

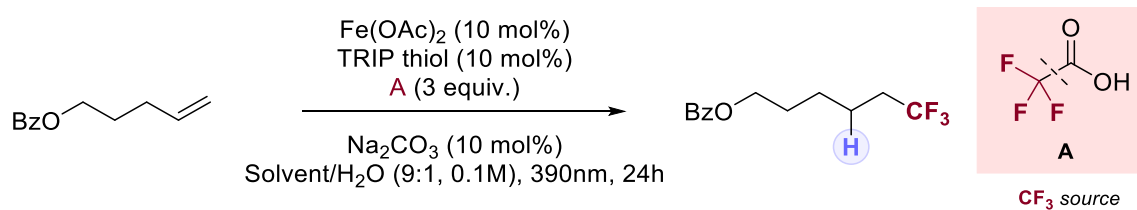

| entry | Solvent | yield |
|-------|---------|-------|
| 1     | DCM     | trace |
| 2     | THF     | 20    |
| 3     | EA      | 42    |
| 4     | Acetone | 76    |

#### Supplemental Table 4. Solvent screening.

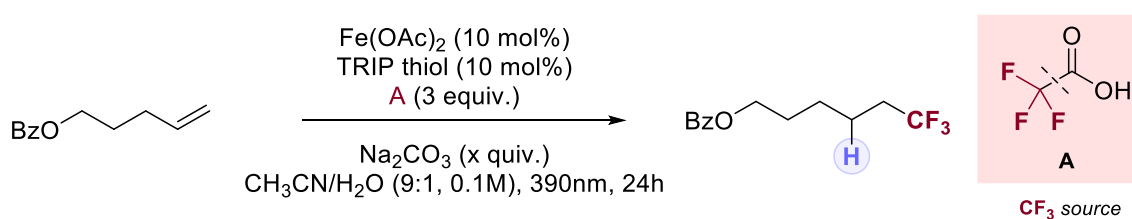

| entry | x        | yield |
|-------|----------|-------|
| 1     | no base  | 72    |
| 2     | 10 mol%  | 86    |
| 3     | 20 mol%  | 80    |
| 4     | 40 mol%  | 76    |
| 5     | 60 mol%  | 70    |
| 6     | 100 mol% | 62    |

#### Supplemental Table 5. Base additive loading screening

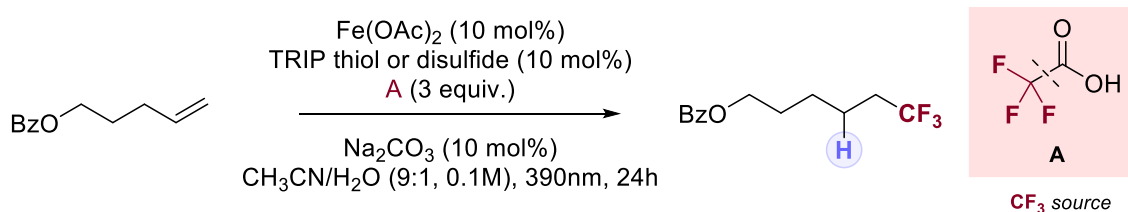

| entry | Deviations from standard conditions | yield                                   |
|-------|-------------------------------------|-----------------------------------------|
| 1     | no Fe                               | ND <sup>a</sup> ; ND <sup>b</sup>       |
| 2     | no light                            | ND <sup>a</sup> ; ND <sup>b</sup>       |
| 3     | no HAT reagent                      | trace <sup>a</sup> ; trace <sup>b</sup> |
| 4     | no water                            | 18 <sup>a</sup> ; 24 <sup>b</sup>       |

<sup>a</sup> with TRIP thiol. <sup>b</sup> with TRIP disulfide.

### Supplemental Table 6. Control experiments.

## 2.2 Optimization of Hydrodifluoromethylation

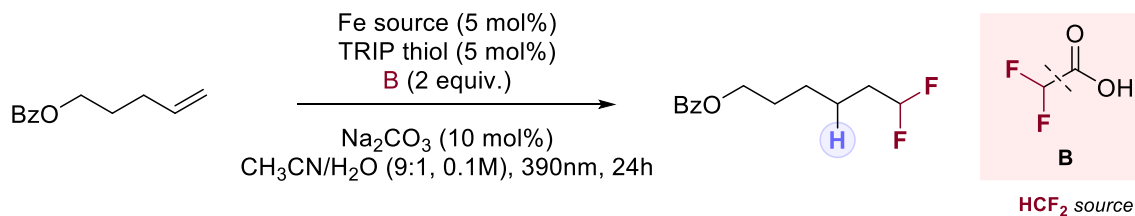

| entry          | [Fe] source                                         | yield |
|----------------|-----------------------------------------------------|-------|
| 1              | Fe(NO <sub>3</sub> ) <sub>3</sub> 9H <sub>2</sub> O | 48    |
| 2              | FeCl <sub>3</sub> 6H <sub>2</sub> O                 | 38    |
| 3              | Fe(OTf) <sub>3</sub>                                | 36    |
| 4              | FeCl <sub>2</sub>                                   | 44    |
| 5              | Fe(OAc) <sub>2</sub>                                | 42    |
| <sup>a</sup> 6 | Fe(NO <sub>3</sub> ) <sub>3</sub> 9H <sub>2</sub> O | 35    |

<sup>a</sup>10 mol% of [Fe] and TRIP disulfide.

### Supplemental Table 7. Iron catalyst screening

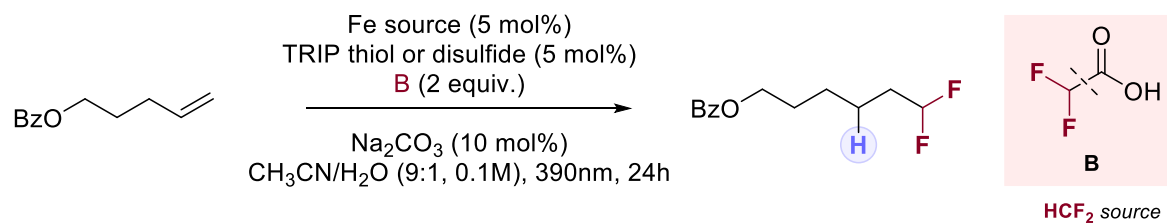

| entry | [Fe]                                                 | Thiol source   | yield |
|-------|------------------------------------------------------|----------------|-------|
| 1     | Fe(NO <sub>3</sub> ) <sub>3</sub> ·9H <sub>2</sub> O | TRIP thiol     | 52    |
| 2     | Fe(NO <sub>3</sub> ) <sub>3</sub> ·9H <sub>2</sub> O | TRIP disulfide | 48    |
| 3     | Fe(OAc) <sub>2</sub>                                 | TRIP thiol     | 46    |
| 4     | Fe(OAc) <sub>2</sub>                                 | TRIP disulfide | 42    |

### Supplemental Table 8. The comparison between TRIP thiol and TRIP disulfide as competent HAT reagents in hydrodifluoromethylation.

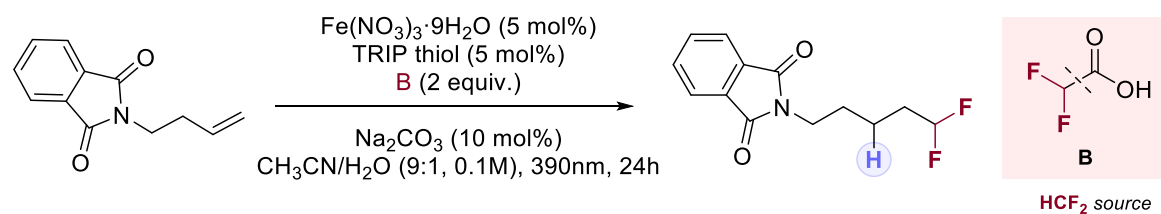

| entry          | [Fe]                                                 | yield               |
|----------------|------------------------------------------------------|---------------------|
| 1              | Fe(NO <sub>3</sub> ) <sub>3</sub> ·9H <sub>2</sub> O | 50                  |
| 2              | Fe(OAc) <sub>2</sub>                                 | 38                  |
| <sup>a</sup> 3 | Fe(NO <sub>3</sub> ) <sub>3</sub> ·9H <sub>2</sub> O | 76(75) <sup>b</sup> |
| <sup>a</sup> 4 | Fe(OAc) <sub>2</sub>                                 | 54                  |

2-(but-3-en-1-yl)isoindoline-1,3-dione was used as substrate due to more precise NMR integration. <sup>a</sup> 3 equiv. of HCF<sub>2</sub>COOH. <sup>b</sup> isolated yield in parentheses.

### Supplemental Table 9. Loading of difluoroacetic acid screening

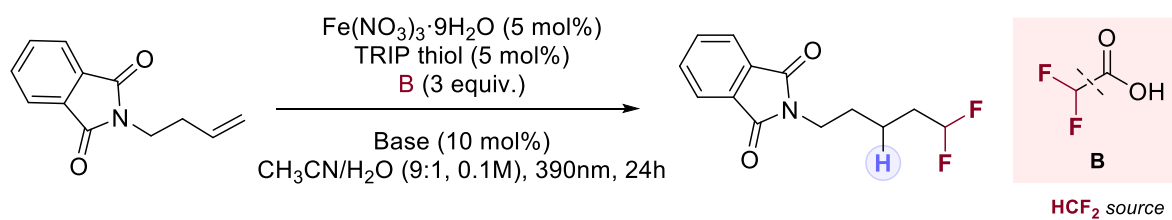

| entry | Base                     | yield |
|-------|--------------------------|-------|
| 1     | $\text{Na}_2\text{CO}_3$ | 76    |
| 2     | $\text{K}_2\text{CO}_3$  | 54    |
| 3     | $\text{Cs}_2\text{CO}_3$ | 68    |

### Supplemental Table 10. Base additive screening

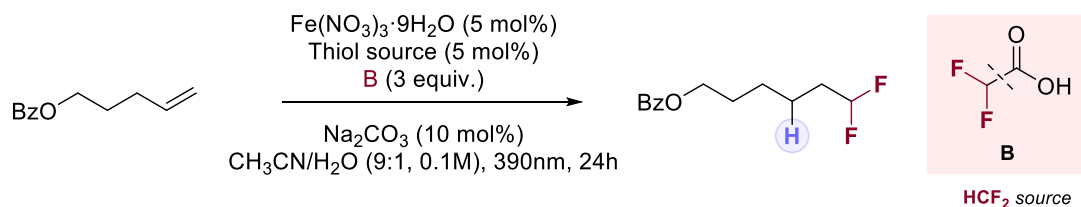

| entry | thiol source                    | yield               |
|-------|---------------------------------|---------------------|
| 1     | 4-CF <sub>3</sub> -thiophenol   | 60                  |
| 2     | 4-Cl-thiophenol                 | 74                  |
| 3     | 4-MeO-thiophenol                | 79                  |
| 4     | 3,5-CF <sub>3</sub> -thiophenol | 51                  |
| 5     | 2-MeO-thiophenol                | 58                  |
| 6     | 2-CO <sub>2</sub> Me-thiophenol | 68                  |
| 7     | TRIP thiol                      | 93(89) <sup>a</sup> |

<sup>a</sup>isolated yield in parentheses.

Supplemental Table 11. Aryl thiol screening (with pent-4-en-1-yl benzoate as substrate).

## 2.3 Optimization of Hydromonofluoromethylation

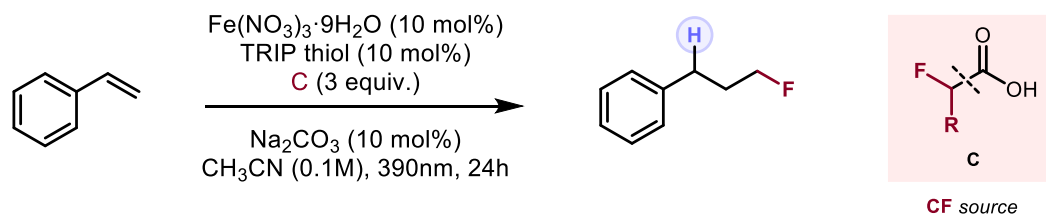

| entry | [Fe]                                                                                      | yield |
|-------|-------------------------------------------------------------------------------------------|-------|
| 1     | Fe(NO <sub>3</sub> ) <sub>3</sub> ·9H <sub>2</sub> O                                      | 25    |
| 2     | FeCl <sub>3</sub> ·6H <sub>2</sub> O                                                      | trace |
| 3     | Fe(OAc) <sub>2</sub>                                                                      | 13    |
| 4     | Fe <sub>2</sub> (C <sub>2</sub> O <sub>4</sub> ) <sub>3</sub> ·6H <sub>2</sub> O (5 mol%) | trace |
| 5     | Fe <sub>2</sub> (SO <sub>4</sub> ) <sub>3</sub> ·5H <sub>2</sub> O (5 mol%)               | trace |

Supplemental Table 12. Iron catalyst screening.

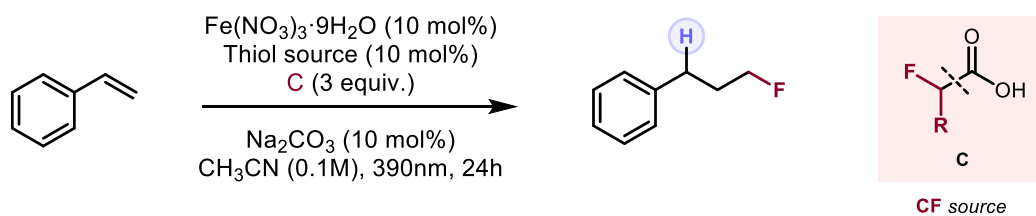

| entry | [Fe]                      | yield |
|-------|---------------------------|-------|
| 1     | TRIP thiol                | 25    |
| 2     | 2-MeO-thiolphenol         | messy |
| 3     | 4-F-thiolphenol           | messy |
| 4     | TRIP silanethiol (5 mol%) | messy |
| 5     | TRIP disulfide (5 mol%)   | messy |

### Supplemental Table 13. Thiol/disulfide screening.

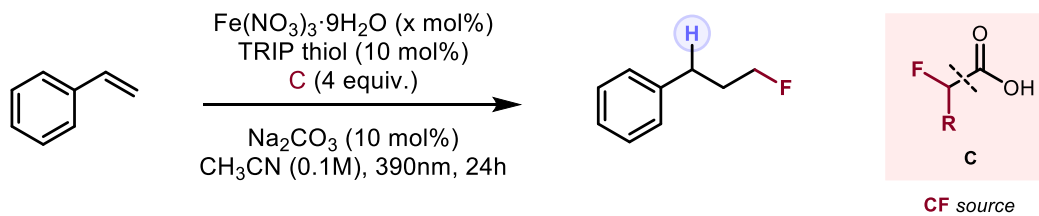

| entry | x   | yield |
|-------|-----|-------|
| 1     | 2.5 | 21    |
| 2     | 5   | 43    |
| 3     | 10  | 25    |

### Supplemental Table 14. Catalyst loading screening.



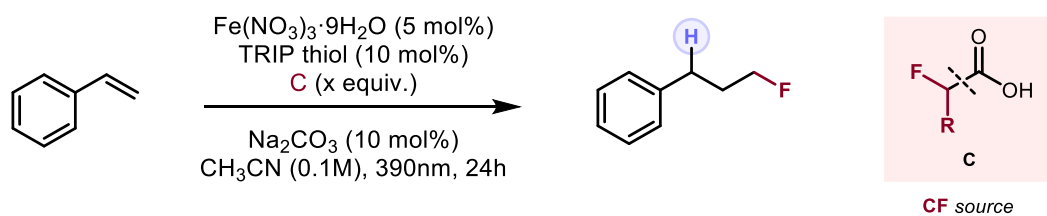

| entry | x | yield |
|-------|---|-------|
| 1     | 3 | 28    |
| 2     | 4 | 43    |
| 3     | 6 | 42    |

**Supplemental Table 15. Monofluoroacetic acid loading screening.**

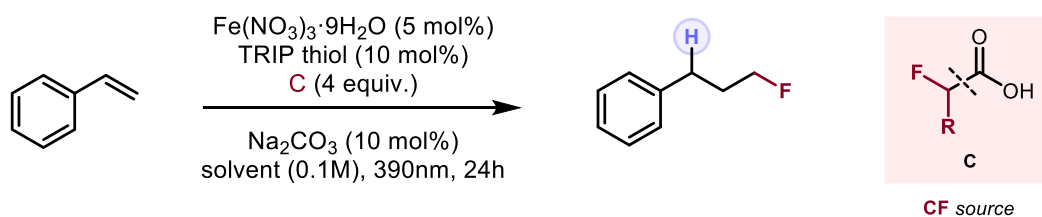

| entry | Solvent                                         | yield |
|-------|-------------------------------------------------|-------|
| 1     | $\text{CH}_3\text{CN}$                          | 43    |
| 2     | $\text{CH}_3\text{CN}/\text{H}_2\text{O}$ (9:1) | 42    |
| 3     | DCE; DCE/ $\text{H}_2\text{O}$ (1:1)            | ND    |

**Supplemental Table 16. Solvent screening.**

## 2.4 Characterization of Corresponding Products

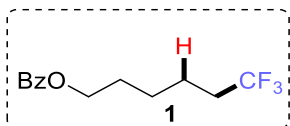

Prepared according to General Procedure A and obtained as colorless oil.  $^1\text{H}$  NMR (600 MHz, Chloroform-*d*)  $\delta$  8.12 – 7.97 (m, 2H), 7.61 – 7.51 (m, 1H), 7.44 (t,  $J$  = 7.8 Hz, 2H), 4.34 (t,  $J$  = 6.5 Hz, 2H), 2.17 – 2.05 (m, 2H), 1.85 – 1.77 (m, 2H), 1.70 – 1.61 (m, 2H), 1.57 – 1.50 (m, 2H).  $^{13}\text{C}$  NMR (151 MHz,  $\text{CDCl}_3$ )  $\delta$  166.62, 132.94, 130.33, 129.55, 128.39, 127.13 (q,  $J$  = 276.3 Hz), 64.56, 33.67 (q,  $J$  = 28.6 Hz), 28.43, 25.32, 21.69 (q,  $J$  = 3.0 Hz).  $^{19}\text{F}$  NMR (565 MHz, Chloroform-*d*)  $\delta$  -66.38 (t,  $J$  = 11.0 Hz). The compound characterization was reported in literature and the NMR data matched with previous characterization.<sup>6</sup>

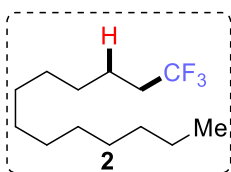

Prepared according to General Procedure A and obtained as colorless oil.  $^1\text{H}$  NMR (600 MHz, Chloroform-*d*)  $\delta$  2.10 – 2.00 (m, 2H), 1.59-1.50 (m, 2H), 1.41 – 1.26 (m, 18H), 0.88 (t,  $J$  = 6.9 Hz, 3H).  $^{13}\text{C}$  NMR (151 MHz,  $\text{CDCl}_3$ )  $\delta$  127.35 (q,  $J$  = 276.2 Hz), 33.78 (q,  $J$  = 28.3 Hz), 31.96, 29.67, 29.63, 29.60, 29.41, 29.39, 29.23, 28.75, 22.73, 21.88 (q,  $J$  = 2.9 Hz), 14.13.  $^{19}\text{F}$  NMR (565 MHz, Chloroform-*d*)  $\delta$  -66.48 (t,  $J$  = 11.0 Hz). GC-MS:  $[\text{M}]^+$  calcd. for  $\text{C}_{13}\text{H}_{25}\text{F}_3$ : 238.1908; Found 238

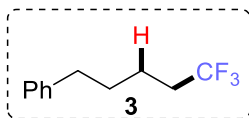

Prepared according to General Procedure A and obtained as colorless oil.  $^1\text{H}$  NMR (600 MHz, Chloroform-*d*)  $\delta$  7.29 (t,  $J$  = 7.6 Hz, 2H), 7.23 – 7.14 (m, 3H), 2.64 (t,  $J$  = 7.6 Hz, 2H), 2.16 – 2.03 (m, 2H), 1.74-1.66 (m, 2H), 1.63 – 1.57 (m, 2H).  $^{13}\text{C}$  NMR (151 MHz,  $\text{CDCl}_3$ )  $\delta$  141.69, 128.42, 128.36, 127.18 (q,  $J$  = 276.3 Hz), 125.95, 35.50, 33.63 (q,  $J$  = 28.4 Hz), 30.47, 21.54 (q,  $J$  = 2.9 Hz).  $^{19}\text{F}$  NMR (565 MHz, Chloroform-*d*)  $\delta$  -66.32 (t,  $J$  = 11.0 Hz). The compound characterization was reported in literature and the NMR data matched with previous characterization.<sup>7</sup>

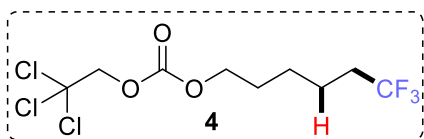

Prepared according to General Procedure A and obtained as colorless oil.  $^1\text{H}$  NMR (600 MHz, Chloroform-*d*)  $\delta$  4.77 (s, 2H), 4.25 (t,  $J$  = 6.5 Hz, 2H), 2.15-2.03 (m, 2H), 1.81-1.70 (m, 2H), 1.66-1.58 (m, 2H), 1.55-1.44 (m, 2H).  $^{13}\text{C}$  NMR (151 MHz,  $\text{CDCl}_3$ )  $\delta$  154.03, 127.06 (q,  $J$  = 276.3 Hz), 94.46, 76.76, 68.74, 33.60 (q,  $J$  = 28.6 Hz), 28.22, 24.86, 21.57 (q,  $J$  = 2.9 Hz).  $^{19}\text{F}$  NMR (565 MHz, Chloroform-*d*)  $\delta$  -66.39 (t,  $J$  = 10.7 Hz). HRMS APCI:  $[\text{M}+\text{H}]^+$  calcd. for  $\text{C}_9\text{H}_{13}\text{Cl}_3\text{F}_3\text{O}_3$ : 330.9877; Found 330.9870

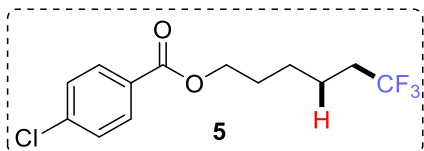

Prepared according to General Procedure A and obtained as colorless oil.  $^1\text{H}$  NMR (600 MHz, Chloroform-*d*)  $\delta$  8.03 – 7.92 (m, 2H), 7.49 – 7.38 (m, 2H), 4.33 (t,  $J$  = 6.5 Hz, 2H), 2.18 – 2.03 (m, 2H), 1.87 – 1.74 (m, 2H), 1.69-1.60 (m, 2H), 1.56 – 1.48 (m, 2H).  $^{13}\text{C}$  NMR (151 MHz,  $\text{CDCl}_3$ )  $\delta$  165.75, 139.41, 130.94, 128.74, 127.11 (q,  $J$  = 276.3 Hz), 64.82, 33.64 (q,  $J$  = 28.4 Hz), 28.37, 25.28, 21.67 (q,  $J$  = 2.8 Hz).  $^{19}\text{F}$  NMR

(565 MHz, Chloroform-*d*)  $\delta$  -66.36 (t,  $J$  = 11.0 Hz). The compound characterization was reported in literature and the NMR data matched with previous characterization.<sup>8</sup>

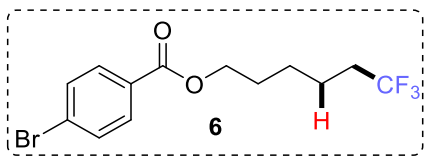

Prepared according to General Procedure A and obtained as colorless oil. <sup>1</sup>H NMR (600 MHz, Chloroform-*d*)  $\delta$  7.94 – 7.85 (m, 2H), 7.63 – 7.55 (m, 2H), 4.33 (t,  $J$  = 6.5 Hz, 2H), 2.17 – 2.04 (m, 2H), 1.84 – 1.76 (m, 2H), 1.70 – 1.62 (m, 2H), 1.56 – 1.48 (m, 2H). <sup>13</sup>C NMR (151 MHz, CDCl<sub>3</sub>)  $\delta$  165.88, 131.74, 131.08, 129.20, 128.07, 127.10 (q,  $J$  = 276.2 Hz), 64.84, 33.63 (q,  $J$  = 28.5 Hz), 28.36, 25.27, 21.67 (q,  $J$  = 3.0 Hz). <sup>19</sup>F NMR (565 MHz, Chloroform-*d*)  $\delta$  -66.36 (t,  $J$  = 10.8 Hz). HRMS APCI: [M+H]<sup>+</sup> calcd. for C<sub>13</sub>H<sub>15</sub>BrF<sub>3</sub>O<sub>2</sub>: 339.0202; Found 339.0199

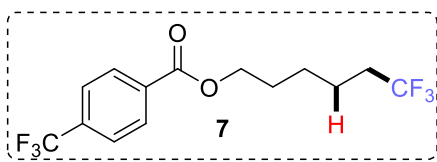

Prepared according to General Procedure A and obtained as colorless oil. <sup>1</sup>H NMR (600 MHz, Chloroform-*d*)  $\delta$  8.15 (d,  $J$  = 8.1 Hz, 2H), 7.71 (d,  $J$  = 8.2 Hz, 2H), 4.37 (t,  $J$  = 6.5 Hz, 2H), 2.20 – 2.04 (m, 2H), 1.87-1.79 (m, 2H), 1.71 – 1.60 (m, 2H), 1.58-1.50 (m, 2H). <sup>13</sup>C NMR (151 MHz, CDCl<sub>3</sub>)  $\delta$  165.39, 134.49 (q,  $J$  = 32.7 Hz), 133.52, 129.96, 127.10 (q,  $J$  = 276.3 Hz), 125.45 (q,  $J$  = 3.8 Hz), 123.65 (q,  $J$  = 272.8 Hz), 65.14, 33.64 (q,  $J$  = 28.6 Hz), 28.35, 25.26, 21.68 (q,  $J$  = 2.8 Hz). <sup>19</sup>F NMR (565 MHz, Chloroform-*d*)  $\delta$  -63.13, -66.37 (t,  $J$  = 11.0 Hz). HRMS APCI: [M+H]<sup>+</sup> calcd. for C<sub>13</sub>H<sub>15</sub>F<sub>6</sub>O<sub>2</sub>: 329.0971; Found 329.0967

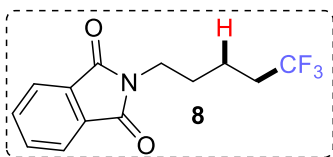

Prepared according to General Procedure A and obtained as white solid. <sup>1</sup>H NMR (600 MHz, Chloroform-*d*)  $\delta$  7.85 (dd,  $J$  = 5.4, 3.0 Hz, 2H), 7.73 (dd,  $J$  = 5.5, 3.0 Hz, 2H), 3.72 (t,  $J$  = 7.1 Hz, 2H), 2.21 – 2.07 (m, 2H), 1.82-1.73 (m, 2H), 1.66-1.57 (m, 2H). <sup>13</sup>C NMR (151 MHz, CDCl<sub>3</sub>)  $\delta$  168.37, 134.04, 132.05, 126.97 (q,  $J$  = 276.4 Hz), 123.31, 37.27, 33.25 (q,  $J$  = 28.7 Hz), 27.66, 19.31 (q,  $J$  = 3.0 Hz). <sup>19</sup>F NMR (565 MHz, Chloroform-*d*)  $\delta$  -66.35 (t,  $J$  = 11.0 Hz). m.p.: 75-76 °C. The compound characterization was reported in literature and the NMR data matched with previous characterization.<sup>9</sup>

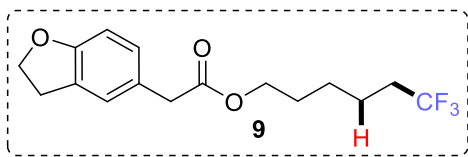

Prepared according to General Procedure A and obtained as colorless oil. <sup>1</sup>H NMR (600 MHz, Chloroform-*d*)  $\delta$  7.14 – 7.09 (m, 1H), 6.99 (dd,  $J$  = 8.2, 1.9 Hz, 1H), 6.73 (d,  $J$  = 8.1 Hz, 1H), 4.56 (t,  $J$  = 8.7 Hz, 2H), 4.09 (t,  $J$  = 6.5 Hz, 2H), 3.53 (s, 2H), 3.19 (t,  $J$  = 8.7 Hz, 2H), 2.13 – 1.98 (m, 2H), 1.69-1.60 (m, 3H), 1.60 – 1.53 (m, 2H), 1.43-1.36 (m, 2H). <sup>13</sup>C NMR (151 MHz, CDCl<sub>3</sub>)  $\delta$  172.15, 159.27, 128.85, 127.39, 127.11 (q,  $J$  = 276.5 Hz), 125.91, 125.78, 109.19, 71.29, 64.35, 40.77, 33.60 (q,  $J$  = 28.4 Hz), 29.70, 28.20, 25.11, 21.56 (q,  $J$  = 3.0 Hz). <sup>19</sup>F NMR (565 MHz, Chloroform-*d*)  $\delta$  -66.36 (t,  $J$  = 11.0 Hz). HRMS APCI: [M+H]<sup>+</sup> calcd. for C<sub>16</sub>H<sub>20</sub>F<sub>3</sub>O<sub>3</sub>: 317.1359; Found 317.1355

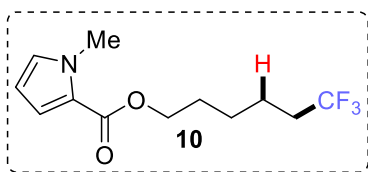

Prepared according to General Procedure A and obtained as colorless oil.  $^1\text{H}$  NMR (600 MHz, Chloroform-*d*)  $\delta$  6.93 (dd,  $J = 4.0, 1.8$  Hz, 1H), 6.78 (t,  $J = 2.2$  Hz, 1H), 6.11 (dd,  $J = 3.9, 2.5$  Hz, 1H), 4.23 (t,  $J = 6.5$  Hz, 2H), 3.92 (s, 3H), 2.18 – 2.01 (m, 2H), 1.79 – 1.71 (m, 2H), 1.67-1.59 (m, 2H), 1.55-1.46 (m, 2H).  $^{13}\text{C}$  NMR (151 MHz,  $\text{CDCl}_3$ )  $\delta$  161.32, 129.52, 127.14 (q,  $J = 276.3$  Hz), 122.51, 117.72, 107.83, 63.34, 36.81, 33.67 (q,  $J = 28.5$  Hz), 28.52, 25.33, 21.66 (q,  $J = 3.0$  Hz).  $^{19}\text{F}$  NMR (565 MHz, Chloroform-*d*)  $\delta$  -66.38 (t,  $J = 11.0$  Hz). HRMS APCI:  $[\text{M}+\text{H}]^+$  calcd. for  $\text{C}_{12}\text{H}_{17}\text{F}_3\text{NO}_2$ : 264.1206; Found 264.1201

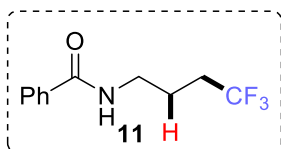

Prepared according to General Procedure A and obtained as colorless oil.  $^1\text{H}$  NMR (600 MHz, Chloroform-*d*)  $\delta$  7.76 (d,  $J = 7.7$  Hz, 2H), 7.51 (t,  $J = 7.4$  Hz, 1H), 7.44 (t,  $J = 7.6$  Hz, 2H), 6.28 (s, 1H), 3.60-3.48 (m, 2H), 2.26 – 2.11 (m, 2H), 1.95-1.86 (m, 2H).  $^{13}\text{C}$  NMR (151 MHz,  $\text{CDCl}_3$ )  $\delta$  167.78, 134.28, 131.68, 127.90, 126.98 (q,  $J = 276.2$  Hz), 126.85, 38.77, 31.36 (q,  $J = 29.1$  Hz), 22.59 (q,  $J = 2.8$  Hz).  $^{19}\text{F}$  NMR (565 MHz, Chloroform-*d*)  $\delta$  -66.13 (t,  $J = 10.8$  Hz). The compound characterization was reported in literature and the NMR data matched with previous characterization.<sup>8</sup>

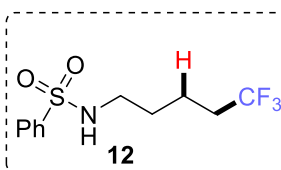

Prepared according to General Procedure A and obtained as colorless oil.  $^1\text{H}$  NMR (600 MHz, Chloroform-*d*)  $\delta$  7.87 (d,  $J = 7.7$  Hz, 2H), 7.60 (t,  $J = 7.4$  Hz, 1H), 7.53 (t,  $J = 7.6$  Hz, 2H), 4.61 (t,  $J = 6.4$  Hz, 1H), 2.99 (q,  $J = 5.9$  Hz, 2H), 2.07-1.97 (m, 2H), 1.59 – 1.53 (m, 4H).  $^{13}\text{C}$  NMR (151 MHz,  $\text{CDCl}_3$ )  $\delta$  139.81, 132.79, 129.21, 127.01, 126.88 (q,  $J = 276.3$  Hz), 42.70, 33.16 (q,  $J = 28.7$  Hz), 28.73, 19.05 (q,  $J = 3.2$  Hz).  $^{19}\text{F}$  NMR (565 MHz, Chloroform-*d*)  $\delta$  -66.34 (t,  $J = 11.0$  Hz). HRMS APCI:  $[\text{M}+\text{H}]^+$  calcd. for  $\text{C}_{11}\text{H}_{15}\text{F}_3\text{NO}_2\text{S}$ : 282.0770; Found 282.0765

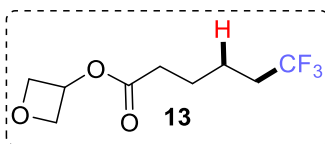

Prepared according to General Procedure A and obtained as colorless oil.  $^1\text{H}$  NMR (600 MHz, Chloroform-*d*)  $\delta$  5.50 – 5.40 (m, 1H), 4.89 (ddd,  $J = 7.5, 6.3, 1.0$  Hz, 2H), 4.63 (ddd,  $J = 7.5, 5.3, 1.0$  Hz, 2H), 2.40 (t,  $J = 7.3$  Hz, 2H), 2.16 – 2.04 (m, 2H), 1.76-1.68 (m, 2H), 1.65 – 1.57 (m, 2H).  $^{13}\text{C}$  NMR (151 MHz,  $\text{CDCl}_3$ )  $\delta$  172.27, 126.95 (q,  $J = 276.3$  Hz), 77.54, 67.92, 33.45 (q,  $J = 28.8$  Hz), 33.41, 23.77, 21.43 (q,  $J = 2.9$  Hz).  $^{19}\text{F}$  NMR (565 MHz, Chloroform-*d*)  $\delta$  -66.37 (t,  $J = 10.6$  Hz). HRMS APCI:  $[\text{M}+\text{H}]^+$  calcd. for  $\text{C}_9\text{H}_{14}\text{F}_3\text{O}_3$ : 227.0890; Found 227.0885

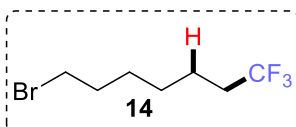

Prepared according to General Procedure A and obtained as colorless oil.  $^1\text{H}$  NMR (600 MHz, Chloroform-*d*)  $\delta$  3.41 (t,  $J = 6.7$  Hz, 2H), 2.12 – 2.04 (m, 2H), 1.91-1.81 (m, 2H), 1.64-1.54 (m, 2H), 1.53 – 1.44 (m, 2H), 1.44-1.37 (m, 2H).  $^{13}\text{C}$  NMR (151 MHz,  $\text{CDCl}_3$ )  $\delta$  127.19 (q,  $J = 276.3$  Hz), 33.63 (q,  $J = 28.3$  Hz),

33.60, 32.44, 27.86, 27.74, 21.76 (q,  $J = 3.0$  Hz).  $^{19}\text{F}$  NMR (565 MHz, Chloroform- $d$ )  $\delta$  -66.41 (t,  $J = 11.0$  Hz). GC-MS:  $[\text{M}]^+$  calcd. for  $\text{C}_7\text{H}_{12}\text{BrF}_3$ : 232.0074; Found 232.0

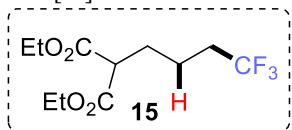

Prepared according to General Procedure A and obtained as colorless oil.  $^1\text{H}$  NMR (600 MHz, Chloroform- $d$ )  $\delta$  4.28-4.15 (m, 4H), 3.33 (t,  $J = 7.4$  Hz, 1H), 2.19 – 2.06 (m, 2H), 1.97 (q,  $J = 7.7$  Hz, 2H), 1.67-1.58 (m, 2H), 1.27 (t,  $J = 7.1$  Hz, 6H).  $^{13}\text{C}$  NMR (151 MHz,  $\text{CDCl}_3$ )  $\delta$  168.99, 126.84 (q,  $J = 276.3$  Hz), 61.57, 51.59, 33.47 (q,  $J = 28.8$  Hz), 27.69, 19.89 (q,  $J = 3.1$  Hz), 14.06.  $^{19}\text{F}$  NMR (565 MHz, Chloroform- $d$ )  $\delta$  -66.40 (t,  $J = 10.9$  Hz). HRMS APCI:  $[\text{M}+\text{H}]^+$  calcd. for  $\text{C}_{11}\text{H}_{18}\text{F}_3\text{O}_4$ : 271.1152; Found 271.1146

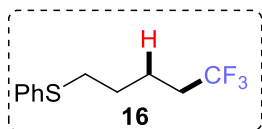

Prepared according to General Procedure A and obtained as colorless oil.  $^1\text{H}$  NMR (600 MHz, Chloroform- $d$ )  $\delta$  7.36 – 7.32 (m, 2H), 7.31-7.27 (m, 2H), 7.22 – 7.16 (m, 1H), 2.98 – 2.89 (m, 2H), 2.15 – 2.01 (m, 2H), 1.76-1.66 (m, 4H).  $^{13}\text{C}$  NMR (151 MHz,  $\text{CDCl}_3$ )  $\delta$  136.13, 129.44, 128.96, 127.01 (q,  $J = 276.4$  Hz), 126.15, 33.34 (q,  $J = 28.8$  Hz), 33.32, 28.16, 21.06 (q,  $J = 3.0$  Hz).  $^{19}\text{F}$  NMR (565 MHz, )  $\delta$  -66.35 (t,  $J = 10.8$  Hz). GC-MS:  $[\text{M}]^+$  calcd. for  $\text{C}_{11}\text{H}_{13}\text{F}_3\text{S}$ : 234.0690; Found 234.1

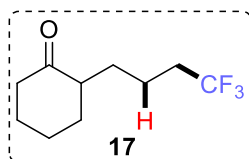

Prepared according to General Procedure A and obtained as colorless oil.  $^1\text{H}$  NMR (600 MHz, Chloroform- $d$ )  $\delta$  2.44-2.37 (m, 1H), 2.34 – 2.24 (m, 2H), 2.16 – 1.99 (m, 4H), 1.91 – 1.80 (m, 2H), 1.71-1.64 (m, 2H), 1.57 – 1.51 (m, 4H).  $^{13}\text{C}$  NMR (151 MHz,  $\text{CDCl}_3$ )  $\delta$  212.61, 127.11 (q,  $J = 276.3$  Hz), 50.41, 42.14, 33.98, 33.97 (d,  $J = 28.5$  Hz), 28.58, 28.00, 25.08, 19.78 (q,  $J = 3.1$  Hz).  $^{19}\text{F}$  NMR (565 MHz, Chloroform- $d$ )  $\delta$  -66.38 (t,  $J = 10.7$  Hz). GC-MS:  $[\text{M}+\text{H}]^+$  calcd. for  $\text{C}_{10}\text{H}_{16}\text{F}_3\text{O}$ : 209.1148; Found 209.0

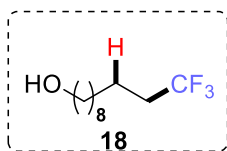

Prepared according to General Procedure A and obtained as colorless oil.  $^1\text{H}$  NMR (600 MHz, Chloroform- $d$ )  $\delta$  3.57 (t,  $J = 6.7$  Hz, 2H), 2.04 – 1.92 (m, 2H), 1.53-1.44 (m, 4H), 1.34-1.19 (m, 13H).  $^{13}\text{C}$  NMR (151 MHz,  $\text{CDCl}_3$ )  $\delta$  127.30 (q,  $J = 276.3$  Hz), 63.04, 33.72 (q,  $J = 28.3$  Hz), 32.77, 29.48, 29.37, 29.28, 29.16, 28.68, 25.72, 21.83 (q,  $J = 2.8$  Hz).  $^{19}\text{F}$  NMR (565 MHz, Chloroform- $d$ )  $\delta$  -66.44 (t,  $J = 11.0$  Hz). HRMS APCI:  $[\text{M}-\text{H}_2\text{O}+\text{H}]^+$  calcd. for  $\text{C}_{11}\text{H}_{20}\text{F}_3$ : 209.1512; Found 209.1507

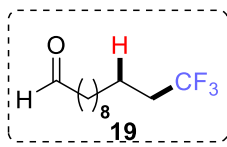

Prepared according to General Procedure A and obtained as colorless oil.  $^1\text{H}$  NMR (600 MHz, Chloroform- $d$ )  $\delta$  9.77 (s, 1H), 2.42 (t,  $J = 7.4$  Hz, 2H), 2.10-2.00 (m, 2H), 1.66-1.60 (m, 2H), 1.55-1.49 (m, 2H), 1.39 – 1.26 (m, 16H).  $^{13}\text{C}$  NMR (151 MHz,  $\text{CDCl}_3$ )  $\delta$  202.91, 127.30 (d,  $J = 276.2$  Hz), 43.91, 33.72 (q,  $J = 28.3$  Hz), 29.30, 29.26, 29.14, 29.13, 28.67, 22.06, 21.83 (q,  $J = 2.9$  Hz).  $^{19}\text{F}$  NMR (565 MHz, Chloroform- $d$ )  $\delta$  -66.41 (t,  $J = 11.0$  Hz). GC-MS:  $[\text{M}+\text{H}]^+$  calcd. for  $\text{C}_{11}\text{H}_{13}\text{F}_3\text{S}$ : 239.1618; Found 239.0

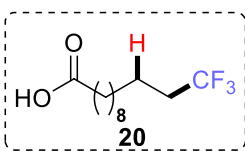

Prepared according to General Procedure A and obtained as colorless oil.  $^1\text{H}$  NMR (600 MHz, Chloroform-*d*)  $\delta$  2.35 (t,  $J = 7.5$  Hz, 2H), 2.10-2.02 (m, 2H), 1.68-1.59 (m, 2H), 1.59-1.50 (m, 2H), 1.38 – 1.25 (m, 14H).  $^{13}\text{C}$  NMR (151 MHz,  $\text{CDCl}_3$ )  $\delta$  179.46, 127.31 (q,  $J = 276.3$  Hz), 33.92, 33.73 (d,  $J = 28.3$  Hz), 29.30, 29.27, 29.17, 29.14, 29.02, 28.68, 24.66, 21.83 (t,  $J = 3.0$  Hz).  $^{19}\text{F}$  NMR (565 MHz, Chloroform-*d*)  $\delta$  -66.42 (t,  $J = 11.0$  Hz). The compound characterization was reported in literature and the NMR data matched with previous characterization.<sup>8</sup>

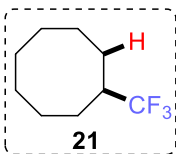

Prepared according to General Procedure A and obtained as colorless oil.  $^1\text{H}$  NMR (600 MHz, Chloroform-*d*)  $\delta$  2.27-2.18 (m, 1H), 1.90-1.81 (m, 2H), 1.80 – 1.71 (m, 2H), 1.62 – 1.49 (m, 10H).  $^{13}\text{C}$  NMR (151 MHz,  $\text{CDCl}_3$ )  $\delta$  128.97 (q,  $J = 279.5$  Hz), 41.92 (q,  $J = 24.4$  Hz), 26.38, 26.29, 25.57 (q,  $J = 2.6$  Hz), 25.11.  $^{19}\text{F}$  NMR (565 MHz, Chloroform-*d*)  $\delta$  -73.34 (d,  $J = 9.8$  Hz). The compound characterization was reported in literature and the NMR data matched with previous characterization.<sup>10</sup>

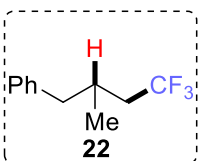

Prepared according to General Procedure A and obtained as colorless oil.  $^1\text{H}$  NMR (600 MHz, Chloroform-*d*)  $\delta$  7.30 (t,  $J = 7.5$  Hz, 2H), 7.22 (t,  $J = 7.4$  Hz, 1H), 7.15 (d,  $J = 7.5$  Hz, 2H), 2.67 (dd,  $J = 13.6, 6.6$  Hz, 1H), 2.53 (dd,  $J = 13.6, 7.5$  Hz, 1H), 2.21 – 2.09 (m, 2H), 1.97 – 1.86 (m, 1H), 1.02 (d,  $J = 6.4$  Hz, 3H).  $^{13}\text{C}$  NMR (151 MHz,  $\text{CDCl}_3$ )  $\delta$  139.56, 129.17, 128.42, 127.19 (q,  $J = 277.5$  Hz), 126.29, 43.22, 39.54 (q,  $J = 27.1$  Hz), 29.65 (q,  $J = 2.3$  Hz), 19.61.  $^{19}\text{F}$  NMR (565 MHz, Chloroform-*d*)  $\delta$  -63.11 (t,  $J = 11.2$  Hz). GC-MS:  $[\text{M}]^+$  calcd. for  $\text{C}_{11}\text{H}_{13}\text{F}_3$ : 202.0969; Found 202.1

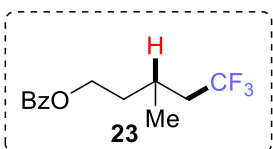

Prepared according to General Procedure A and obtained as colorless oil.  $^1\text{H}$  NMR (600 MHz, Chloroform-*d*)  $\delta$  8.06 – 8.00 (m, 2H), 7.59 – 7.54 (m, 1H), 7.47-7.41 (m, 2H), 4.42 – 4.34 (m, 2H), 2.26-2.15 (m, 1H), 2.15 – 2.08 (m, 1H), 2.08-1.97 (m, 1H), 1.97 – 1.88 (m, 1H), 1.76-1.66 (m, 1H), 1.12 (d,  $J = 6.7$  Hz, 3H).  $^{13}\text{C}$  NMR (151 MHz,  $\text{CDCl}_3$ )  $\delta$  164.67, 131.13, 128.30, 127.66, 126.54, 125.11 (q,  $J = 277.4$  Hz), 60.59, 38.33 (q,  $J = 27.2$  Hz), 33.41, 23.22 (q,  $J = 2.5$  Hz), 17.75.  $^{19}\text{F}$  NMR (565 MHz, Chloroform-*d*)  $\delta$  -63.30 (t,  $J = 11.1$  Hz). The compound characterization was reported in literature and the NMR data matched with previous characterization.<sup>6</sup>

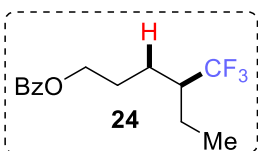

Prepared according to General Procedure A and obtained as colorless oil. 1.3:1 mixture of regioisomers.  $^1\text{H}$  NMR (600 MHz, Chloroform-*d*)  $\delta$  8.00-7.91 (m, 2H), 7.52-7.46 (m, 1H), 7.41-7.31 (m, 2H), 4.38-4.29 (m, 0.84H), 4.28-4.23 (m, 1.16H), 2.24-2.18 (m, 0.38H), 2.09 – 1.92 (m, 1.14H), 1.89 – 1.75 (m, 1.74H), 1.73 – 1.51 (m, 2.63H), 1.51 – 1.32 (m, 2.09H), 0.96-0.90 (m, 1.74H), 0.89-0.83 (m, 1.26H).  $^{13}\text{C}$  NMR (151 MHz,  $\text{CDCl}_3$ )  $\delta$  166.57, 166.41, 133.09, 132.98, 130.23, 130.03, 129.55, 129.53, 128.51 (q,  $J = 280.6$  Hz), 128.43, 128.36 (q,  $J = 280.2$  Hz), 128.40, 64.57, 62.35, 43.63 (q,  $J = 24.8$  Hz), 39.69 (q,  $J = 25.7$  Hz), 30.09 (q,  $J = 2.5$  Hz), 27.24 (q,  $J = 2.6$  Hz),

26.05, 23.83 (q,  $J = 2.6$  Hz), 20.66 (q,  $J = 2.7$  Hz), 19.95, 14.00, 11.16.  $^{19}\text{F}$  NMR (565 MHz, Chloroform- $d$ )  $\delta$  -69.85 (d,  $J = 9.6$  Hz), -70.50 (d,  $J = 9.7$  Hz). HRMS APCI:  $[\text{M}+\text{H}]^+$  calcd. for  $\text{C}_{14}\text{H}_{18}\text{F}_3\text{O}_2$ : 275.1253; Found 275.1247

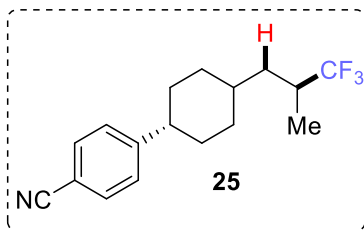

Prepared according to General Procedure A and obtained as colorless oil. 7:1 mixture of regioisomers.  $^1\text{H}$  NMR (600 MHz, Chloroform- $d$ )  $\delta$  7.58 (d,  $J = 8.0$  Hz, 1H), 7.30 (d,  $J = 8.3$  Hz, 1H), 2.60-2.50 (m, 1H), 2.32 – 2.21 (m, 0.78H), 1.98 – 1.84 (m, 4.25H), 1.69-1.62 (m, 0.5H), 1.58-1.50 (m, 1.21H), 1.50 – 1.40 (m, 3.12H), 1.32-1.26 (m, 1H), 1.20-1.13 (m, 0.86H), 1.13-1.09 (m, 2.23H), 1.06 – 1.00 (m, 1.37H).  $^{13}\text{C}$  NMR (151 MHz,  $\text{CDCl}_3$ )  $\delta$  152.80, 152.55, 132.28, 132.25, 128.69 (q,  $J = 282.1$  Hz), 128.63 (q,  $J = 279.2$  Hz), 127.66, 127.63, 119.13, 119.11, 109.86, 109.80, 49.41 (q,  $J = 23.3$  Hz), 44.56, 44.31, 36.71 (q,  $J = 2.4$  Hz), 36.54 (q,  $J = 1.6$  Hz), 35.15 (q,  $J = 26.2$  Hz), 34.00, 33.95, 33.89, 33.80, 33.64, 33.47, 32.08, 30.11, 29.31, 18.45 (q,  $J = 2.7$  Hz), 12.95 (q,  $J = 3.2$  Hz), 12.83.  $^{19}\text{F}$  NMR (565 MHz, Chloroform- $d$ )  $\delta$  -65.61 (d,  $J = 10.3$  Hz), -73.47 (d,  $J = 8.8$  Hz). HRMS APCI:  $[\text{M}+\text{H}]^+$  calcd. for  $\text{C}_{17}\text{H}_{21}\text{F}_3\text{N}$ : 296.1621; Found 296.1615

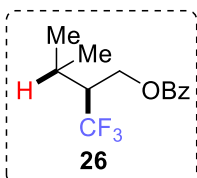

Prepared according to General Procedure A and obtained as colorless oil.  $^1\text{H}$  NMR (600 MHz, Chloroform- $d$ )  $\delta$  8.04 (d,  $J = 7.7$  Hz, 2H), 7.58 (t,  $J = 7.4$  Hz, 1H), 7.45 (t,  $J = 7.6$  Hz, 2H), 4.52 (qd,  $J = 11.9, 5.5$  Hz, 2H), 2.53-2.41 (m, 1H), 2.39-2.19 (m, 1H), 1.15 (d,  $J = 7.0$  Hz, 3H), 1.08 (d,  $J = 7.0$  Hz, 3H).  $^{13}\text{C}$  NMR (151 MHz,  $\text{CDCl}_3$ )  $\delta$  166.22, 133.24, 129.71, 129.67, 128.47, 127.33 (d,  $J = 281.7$  Hz), 59.96, 59.94, 47.97 (q,  $J = 24.1$  Hz), 25.65 (d,  $J = 2.2$  Hz), 20.92, 19.02.  $^{19}\text{F}$  NMR (565 MHz, Chloroform- $d$ )  $\delta$  -65.99 (d,  $J = 9.8$  Hz). The compound characterization was reported in literature and the NMR data matched with previous characterization.<sup>11</sup>

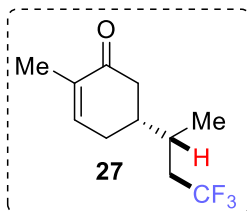

Prepared according to General Procedure A and obtained as colorless oil. 1:1 mixture of diastereomers.  $^1\text{H}$  NMR (600 MHz, Chloroform- $d$ )  $\delta$  6.74 (d,  $J = 6.1$ , 1H), 2.52-2.43 (m, 1H), 2.38-2.27 (m, 1H), 2.23 – 2.02 (m, 4H), 1.99 – 1.87 (m, 2H), 1.82 – 1.76 (m, 3H), 1.05 (dd,  $J = 6.6, 4.2$  Hz, 3H).  $^{13}\text{C}$  NMR (151 MHz,  $\text{CDCl}_3$ )  $\delta$  199.43, 199.39, 144.40, 144.31, 135.68, 135.65, 127.10 (q,  $J = 277.3$  Hz), 41.91, 40.33, 40.18, 40.13, 37.77 (q,  $J = 27.5$  Hz), 37.58 (q,  $J = 27.7$  Hz), 31.47 (q,  $J = 2.2$  Hz), 31.40 (q,  $J = 2.2$  Hz), 29.90, 28.29, 16.32, 16.21, 15.66, 15.64.  $^{19}\text{F}$  NMR (565 MHz, Chloroform- $d$ )  $\delta$  -63.52 (t,  $J = 11.0$  Hz), -63.54 (t,  $J = 11.0$  Hz). The compound characterization was reported in literature and the NMR data matched with previous characterization.<sup>12</sup>

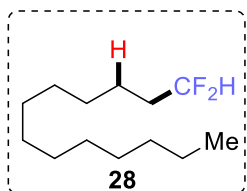

Prepared according to General Procedure B and obtained as colorless oil.  $^1\text{H}$  NMR (600 MHz, Chloroform- $d$ )  $\delta$  5.79 (tt,  $J = 57.0, 4.6$  Hz, 1H), 1.88-1.73 (m, 2H), 1.48-1.40 (m, 2H), 1.37 – 1.25 (m, 18H), 0.88 (t,

$J = 6.9$  Hz, 3H).  $^{13}\text{C}$  NMR (151 MHz,  $\text{CDCl}_3$ )  $\delta$  117.52 (t,  $J = 238.6$  Hz), 34.10 (t,  $J = 20.6$  Hz), 31.92, 29.65, 29.63, 29.59, 29.44, 29.37, 29.35, 29.07, 22.69, 22.13 (t,  $J = 5.4$  Hz), 14.11.  $^{19}\text{F}$  NMR (565 MHz, Chloroform- $d$ )  $\delta$  -115.73 (dt,  $J = 57.1$ , 17.6 Hz). The compound characterization was reported in literature and the NMR data matched with previous characterization.<sup>13</sup>

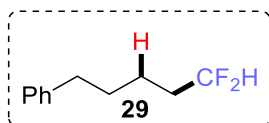

Prepared according to General Procedure B and obtained as colorless oil.  $^1\text{H}$  NMR (600 MHz, Chloroform- $d$ )  $\delta$  7.31 – 7.26 (m, 2H), 7.21 – 7.14 (m, 3H), 5.78 (tt,  $J = 56.9$ , 4.5 Hz, 1H), 2.68 – 2.58 (m, 2H), 1.92 – 1.78 (m, 2H), 1.75 – 1.61 (m, 2H), 1.52 – 1.44 (m, 2H).  $^{13}\text{C}$  NMR (151 MHz,  $\text{CDCl}_3$ )  $\delta$  141.98, 128.38, 125.87, 117.34 (t,  $J = 238.7$  Hz), 35.67, 33.98 (t,  $J = 20.7$  Hz), 30.87, 21.78 (t,  $J = 5.5$  Hz).  $^{19}\text{F}$  NMR (565 MHz, Chloroform- $d$ )  $\delta$  -115.72 (dt,  $J = 56.4$ , 17.3 Hz). The compound characterization was reported in literature and the NMR data matched with previous characterization.<sup>14</sup>

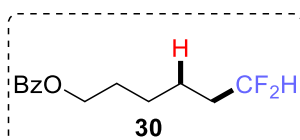

Prepared according to General Procedure B and obtained as colorless oil.  $^1\text{H}$  NMR (600 MHz, Chloroform- $d$ )  $\delta$  8.07 – 8.01 (m, 2H), 7.58 – 7.54 (m, 1H), 7.47 – 7.41 (m, 2H), 5.81 (tt,  $J = 56.8$ , 4.4 Hz, 1H), 4.33 (t,  $J = 6.5$  Hz, 2H), 1.92 – 1.75 (m, 4H), 1.58 – 1.46 (m, 4H).  $^{13}\text{C}$  NMR (151 MHz,  $\text{CDCl}_3$ )  $\delta$  166.64, 132.91, 130.38, 129.54, 128.37, 117.23 (t,  $J = 238.9$  Hz), 64.68, 33.98 (t,  $J = 20.7$  Hz), 28.56, 25.64, 21.83 (t,  $J = 5.5$  Hz).  $^{19}\text{F}$  NMR (565 MHz, Chloroform- $d$ )  $\delta$  -115.88 (dt,  $J = 57.0$ , 17.6 Hz). HRMS APCI:  $[\text{M}+\text{H}]^+$  calcd. for  $\text{C}_{13}\text{H}_{17}\text{F}_2\text{O}_2$ : 243.1191; Found 243.1190

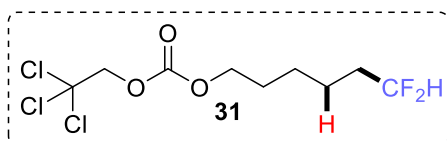

Prepared according to General Procedure B and obtained as colorless oil.  $^1\text{H}$  NMR (600 MHz, Chloroform- $d$ )  $\delta$  5.81 (tt,  $J = 56.8$ , 4.4 Hz, 1H), 4.77 (s, 2H), 4.24 (t,  $J = 6.6$  Hz, 2H), 1.90–1.79 (m, 2H), 1.78 – 1.72 (m, 2H), 1.54 – 1.44 (m, 4H).  $^{13}\text{C}$  NMR (151 MHz,  $\text{CDCl}_3$ )  $\delta$  154.04, 117.13 (t,  $J = 238.8$  Hz), 94.47, 76.75, 68.90, 33.89 (t,  $J = 20.8$  Hz), 28.35, 25.19, 21.69 (t,  $J = 5.5$  Hz).  $^{19}\text{F}$  NMR (565 MHz, Chloroform- $d$ )  $\delta$  -115.96 (dt,  $J = 56.8$ , 17.4 Hz). HRMS APCI:  $[\text{M}+\text{H}]^+$  calcd. for  $\text{C}_9\text{H}_{14}\text{Cl}_3\text{F}_2\text{O}_3$ : 312.9971; Found 312.9967

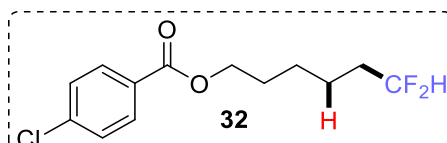

Prepared according to General Procedure B and obtained as colorless oil.  $^1\text{H}$  NMR (600 MHz, Chloroform- $d$ )  $\delta$  8.02 – 7.92 (m, 2H), 7.47 – 7.37 (m, 2H), 5.81 (tt,  $J = 56.9$ , 4.4 Hz, 1H), 4.32 (t,  $J = 6.6$  Hz, 2H), 1.91 – 1.76 (m, 4H), 1.57 – 1.47 (m, 4H).  $^{13}\text{C}$  NMR (151 MHz,  $\text{CDCl}_3$ )  $\delta$  165.77, 139.37, 130.94, 128.80, 128.73, 117.20 (t,  $J = 238.9$  Hz), 64.94, 33.95 (t,  $J = 20.9$  Hz), 28.51, 25.61, 21.79 (t,  $J = 5.5$  Hz).  $^{19}\text{F}$  NMR (565 MHz, Chloroform- $d$ )  $\delta$  -115.90 (dt,  $J = 57.2$ , 18.0 Hz). HRMS APCI:  $[\text{M}+\text{H}]^+$  calcd. for  $\text{C}_{13}\text{H}_{16}\text{ClF}_2\text{O}_2$ : 277.0801; Found 277.0796

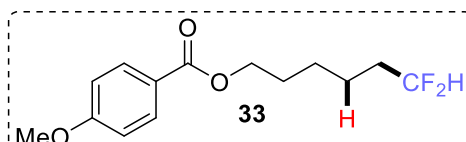

Prepared according to General Procedure B and obtained as colorless oil.  $^1\text{H}$  NMR (600 MHz, Chloroform- $d$ )  $\delta$  8.04 – 7.94 (m, 2H), 6.99 – 6.86 (m, 2H), 5.81 (tt,  $J = 56.9$ , 4.5 Hz, 1H),



4.30 (t,  $J = 6.5$  Hz, 2H), 3.86 (s, 3H), 1.91-1.82 (m, 2H), 1.81 – 1.76 (m, 2H), 1.57-1.47 (m, 4H).  $^{13}\text{C}$  NMR (151 MHz,  $\text{CDCl}_3$ )  $\delta$  166.40, 163.34, 131.55, 122.81, 117.25 (t,  $J = 238.7$  Hz), 113.61, 64.38, 55.44, 33.98 (t,  $J = 20.8$  Hz), 28.60, 25.66, 21.84 (t,  $J = 5.5$  Hz).  $^{19}\text{F}$  NMR (565 MHz, Chloroform-*d*)  $\delta$  -115.86 (dt,  $J = 56.7, 17.4$  Hz). HRMS APCI:  $[\text{M}+\text{H}]^+$  calcd. for  $\text{C}_{14}\text{H}_{19}\text{F}_2\text{O}_3$ : 273.1297; Found 273.1293

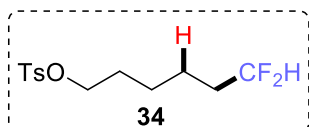

Prepared according to General Procedure B and obtained as colorless oil.  $^1\text{H}$  NMR (600 MHz, Chloroform-*d*)  $\delta$  7.83 – 7.75 (m, 2H), 7.39 – 7.32 (m, 2H), 5.76 (tt,  $J = 56.8, 4.4$  Hz, 1H), 4.03 (t,  $J = 6.3$  Hz, 2H), 2.45 (s, 3H), 1.82 – 1.72 (m, 2H), 1.70-1.63 (m, 2H), 1.44 – 1.34 (m, 4H).  $^{13}\text{C}$  NMR (151 MHz,  $\text{CDCl}_3$ )  $\delta$  144.81, 133.11, 129.89, 129.87, 127.88, 117.06 (t,  $J = 238.9$  Hz), 70.14, 33.81 (t,  $J = 20.8$  Hz), 28.62, 24.93, 21.63, 21.44 (t,  $J = 5.6$  Hz).  $^{19}\text{F}$  NMR (565 MHz, Chloroform-*d*)  $\delta$  -116.00 (dt,  $J = 57.0, 17.7$  Hz). HRMS APCI:  $[\text{M}+\text{NH}_4]^+$  calcd. for  $\text{C}_{13}\text{H}_{22}\text{F}_2\text{NO}_3\text{S}$ : 310.1283; Found 310.1279

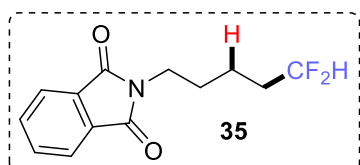

Prepared according to General Procedure B and obtained as white solid.  $^1\text{H}$  NMR (600 MHz, Chloroform-*d*)  $\delta$  7.85 (dd,  $J = 5.4, 3.0$  Hz, 2H), 7.72 (dd,  $J = 5.5, 3.0$  Hz, 2H), 5.80 (tt,  $J = 56.7, 4.4$  Hz, 1H), 3.71 (t,  $J = 7.2$  Hz, 2H), 1.95 – 1.83 (m, 2H), 1.79-1.72 (m, 2H), 1.55 – 1.49 (m, 2H).  $^{13}\text{C}$  NMR (151 MHz,  $\text{CDCl}_3$ )  $\delta$  168.40, 133.99, 132.08, 123.26, 117.03 (t,  $J = 239.0$  Hz), 37.49, 33.55 (t,  $J = 21.0$  Hz), 28.04, 19.44 (t,  $J = 5.5$  Hz).  $^{19}\text{F}$  NMR (565 MHz, Chloroform-*d*)  $\delta$  -115.97 (dt,  $J = 56.8, 17.5$  Hz). m.p.: 76-77 °C. HRMS APCI:  $[\text{M}+\text{H}]^+$  calcd. for  $\text{C}_{13}\text{H}_{14}\text{F}_2\text{NO}_2$ : 254.0987; Found 254.0984

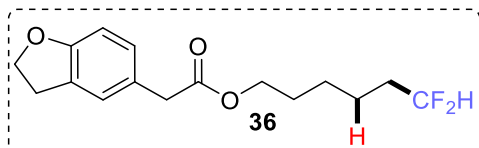

Prepared according to General Procedure B and obtained as colorless oil.  $^1\text{H}$  NMR (600 MHz, Chloroform-*d*)  $\delta$  7.11 (d,  $J = 2.0$  Hz, 1H), 6.99 (dd,  $J = 8.1, 1.9$  Hz, 1H), 6.72 (d,  $J = 8.1$  Hz, 1H), 5.78 (tt,  $J = 56.8, 4.4$  Hz, 1H), 4.55 (t,  $J = 8.7$  Hz, 2H), 4.09 (t,  $J = 6.6$  Hz, 2H), 3.53 (s, 2H), 3.19 (t,  $J = 8.7$  Hz, 2H), 1.86-1.74 (m, 2H), 1.69 – 1.60 (m, 2H), 1.50 – 1.40 (m, 2H), 1.40-1.34 (m, 2H).  $^{13}\text{C}$  NMR (151 MHz,  $\text{CDCl}_3$ )  $\delta$  172.16, 159.26, 128.85, 127.38, 125.95, 125.78, 117.21 (t,  $J = 238.8$  Hz), 109.17, 71.29, 64.47, 40.78, 33.92 (t,  $J = 20.8$  Hz), 29.70, 28.35, 25.43, 21.72 (t,  $J = 5.5$  Hz).  $^{19}\text{F}$  NMR (565 MHz, Chloroform-*d*)  $\delta$  -115.86 (dt,  $J = 56.5, 17.8$  Hz). HRMS APCI:  $[\text{M}+\text{H}]^+$  calcd. for  $\text{C}_{16}\text{H}_{21}\text{F}_2\text{O}_3$ : 299.1453; Found 299.1448

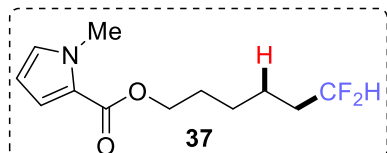

Prepared according to General Procedure B and obtained as colorless oil.  $^1\text{H}$  NMR (600 MHz, Chloroform-*d*)  $\delta$  6.93 (dd,  $J = 4.0, 1.8$  Hz, 1H), 6.78 (t,  $J = 2.2$  Hz, 1H), 6.11 (dd,  $J = 3.9, 2.5$  Hz, 1H), 5.81 (tt,  $J = 56.9, 4.5$  Hz, 1H), 4.22 (t,  $J = 6.5$  Hz, 2H), 3.92 (s, 3H), 1.91 – 1.79 (m, 2H), 1.78-1.71 (m, 2H), 1.55 – 1.44 (m, 4H).  $^{13}\text{C}$  NMR (151 MHz,  $\text{CDCl}_3$ )  $\delta$  161.35, 129.48, 122.56, 117.70, 117.26 (t,  $J = 238.7$  Hz), 107.82, 63.46, 36.81, 33.99 (t,  $J = 20.7$  Hz), 28.65, 25.65, 21.83 (t,  $J = 5.5$  Hz).  $^{19}\text{F}$  NMR (565 MHz, Chloroform-*d*)  $\delta$  -115.85 (dt,  $J = 56.8, 17.7$  Hz). HRMS APCI:  $[\text{M}+\text{H}]^+$  calcd. for  $\text{C}_{12}\text{H}_{18}\text{F}_2\text{NO}_2$ : 246.1300; Found 242.1296

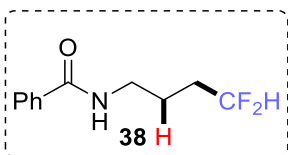

Prepared according to General Procedure B and obtained as colorless oil.  $^1\text{H}$  NMR (600 MHz, Chloroform-*d*)  $\delta$  7.79 – 7.73 (m, 2H), 7.53 – 7.48 (m, 1H), 7.48-7.40 (m, 2H), 6.23 (s, 1H), 5.88 (tt,  $J$  = 56.6, 4.2 Hz, 1H), 3.53 (q,  $J$  = 6.7 Hz, 2H), 2.00-1.86 (m, 2H), 1.86-1.76 (m, 2H).  $^{13}\text{C}$  NMR (151 MHz,  $\text{CDCl}_3$ )  $\delta$  167.68, 134.42, 131.58, 128.64, 126.82, 116.87 (t,  $J$  = 239.1 Hz), 39.21, 31.47 (t,  $J$  = 21.3 Hz), 22.46 (t,  $J$  = 5.2 Hz).  $^{19}\text{F}$  NMR (565 MHz, Chloroform-*d*)  $\delta$  -115.99 (dt,  $J$  = 56.9, 17.6 Hz). HRMS APCI:  $[\text{M}+\text{H}]^+$  calcd. for  $\text{C}_{12}\text{H}_{14}\text{F}_2\text{NO}$ : 214.1038; Found 214.1034

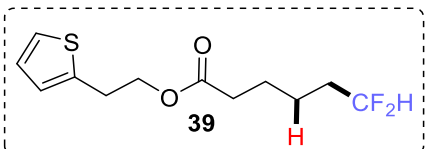

Prepared according to General Procedure B and obtained as colorless oil.  $^1\text{H}$  NMR (600 MHz, Chloroform-*d*)  $\delta$  7.16 (dd,  $J$  = 5.1, 1.2 Hz, 1H), 6.94 (dd,  $J$  = 5.1, 3.4 Hz, 1H), 6.86 (dt,  $J$  = 3.3, 1.1 Hz, 1H), 5.79 (tt,  $J$  = 56.8, 4.4 Hz, 1H), 4.31 (t,  $J$  = 6.7 Hz, 2H), 3.16 (td,  $J$  = 6.7, 0.9 Hz, 2H), 2.35 (t,  $J$  = 7.4 Hz, 2H), 1.90 – 1.76 (m, 2H), 1.74-1.64 (m, 2H), 1.52 – 1.43 (m, 2H).  $^{13}\text{C}$  NMR (151 MHz,  $\text{CDCl}_3$ )  $\delta$  173.07, 139.94, 126.87, 125.52, 124.03, 117.09 (t,  $J$  = 238.9 Hz), 64.59, 33.94, 33.76 (t,  $J$  = 20.8 Hz), 29.32, 21.62 (t,  $J$  = 5.5 Hz).  $^{19}\text{F}$  NMR (565 MHz, Chloroform-*d*)  $\delta$  -115.91 (dt,  $J$  = 57.1, 17.6 Hz). HRMS APCI:  $[\text{M}+\text{H}]^+$  calcd. for  $\text{C}_{12}\text{H}_{17}\text{F}_2\text{O}_2\text{S}$ : 263.0912; Found 263.0909

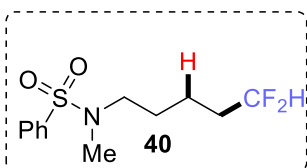

Prepared according to General Procedure B and obtained as colorless oil.  $^1\text{H}$  NMR (600 MHz, Chloroform-*d*)  $\delta$  7.83 – 7.75 (m, 2H), 7.62 – 7.57 (m, 1H), 7.56 – 7.50 (m, 2H), 5.81 (tt,  $J$  = 56.8, 4.4 Hz, 1H), 3.02 (t,  $J$  = 6.9 Hz, 2H), 2.73 (s, 3H), 1.93 – 1.78 (m, 2H), 1.64 – 1.57 (m, 2H), 1.57 – 1.48 (m, 2H).  $^{13}\text{C}$  NMR (151 MHz,  $\text{CDCl}_3$ )  $\delta$  137.47, 132.60, 129.09, 127.33, 117.13 (t,  $J$  = 239.0 Hz), 49.65, 34.68, 33.45 (t,  $J$  = 20.9 Hz), 27.00, 19.06 (t,  $J$  = 5.6 Hz).  $^{19}\text{F}$  NMR (565 MHz, Chloroform-*d*)  $\delta$  -115.85 (dt,  $J$  = 57.0, 17.9 Hz). HRMS APCI:  $[\text{M}+\text{H}]^+$  calcd. for  $\text{C}_{12}\text{H}_{18}\text{F}_2\text{NO}_2\text{S}$ : 278.1021; Found 278.1016

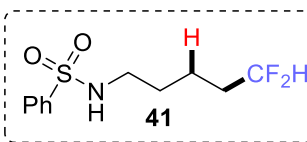

Prepared according to General Procedure B and obtained as colorless oil.  $^1\text{H}$  NMR (600 MHz, Chloroform-*d*)  $\delta$  7.92 – 7.82 (m, 2H), 7.62 – 7.57 (m, 1H), 7.56-7.51 (m, 2H), 5.75 (tt,  $J$  = 56.7, 4.4 Hz, 1H), 4.70 (t,  $J$  = 6.3 Hz, 1H), 2.97 (q,  $J$  = 6.7 Hz, 2H), 1.83 – 1.72 (m, 2H), 1.57-1.49 (m, 2H), 1.50 – 1.41 (m, 2H).  $^{13}\text{C}$  NMR (151 MHz,  $\text{CDCl}_3$ )  $\delta$  139.86, 132.74, 129.19, 127.02, 116.93 (t,  $J$  = 239.0 Hz), 42.85, 33.41 (t,  $J$  = 21.0 Hz), 29.09, 19.08 (t,  $J$  = 5.6 Hz).  $^{19}\text{F}$  NMR (565 MHz, Chloroform-*d*)  $\delta$  -116.05 (dt,  $J$  = 57.0, 17.9 Hz). HRMS APCI:  $[\text{M}+\text{H}]^+$  calcd. for  $\text{C}_{11}\text{H}_{16}\text{F}_2\text{NO}_2\text{S}$ : 264.0864; Found 264.0860

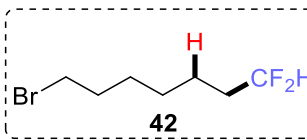

Prepared according to General Procedure B and obtained as colorless oil.  $^1\text{H}$  NMR (600 MHz, Chloroform-*d*)  $\delta$  5.80 (tt,  $J$  = 56.9, 4.5 Hz, 1H), 3.41 (t,  $J$  = 6.8 Hz, 2H), 1.90 – 1.78 (m, 4H), 1.51 – 1.44 (m, 4H), 1.42-1.35 (m, 2H).  $^{13}\text{C}$  NMR (151 MHz,  $\text{CDCl}_3$ )  $\delta$  117.31 (t,  $J$  = 238.7 Hz), 33.95 (t,  $J$  = 20.7 Hz), 33.71,

32.51, 28.21, 27.89, 21.92 (t,  $J = 5.5$  Hz).  $^{19}\text{F}$  NMR (565 MHz, Chloroform- $d$ )  $\delta$  -115.85 (dt,  $J = 56.7, 17.8$  Hz). The compound characterization was reported in literature and the NMR data matched with previous characterization.<sup>15</sup>

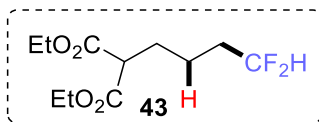

Prepared according to General Procedure B and obtained as colorless oil.  $^1\text{H}$  NMR (600 MHz, Chloroform- $d$ )  $\delta$  5.81 (tt,  $J = 56.7, 4.4$  Hz, 1H), 4.25-4.16 (m, 4H), 3.33 (t,  $J = 7.4$  Hz, 1H), 1.95 (q,  $J = 7.7$  Hz, 2H), 1.92-1.81 (m, 2H), 1.54 – 1.47 (m, 2H), 1.27 (t,  $J = 7.1$  Hz, 6H).  $^{13}\text{C}$  NMR (151 MHz,  $\text{CDCl}_3$ )  $\delta$  169.16, 116.85 (t,  $J = 239.1$  Hz), 61.50, 51.77, 33.72 (t,  $J = 21.1$  Hz), 28.10, 19.98 (t,  $J = 5.6$  Hz), 14.07.  $^{19}\text{F}$  NMR (565 MHz, Chloroform- $d$ )  $\delta$  -116.12 (dt,  $J = 56.8, 17.9$  Hz). GC-MS:  $[\text{M}+\text{H}]^+$  calcd. for  $\text{C}_{11}\text{H}_{19}\text{F}_2\text{O}_4$ : 253.1246; Found 253

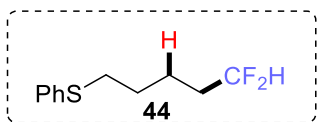

Prepared according to General Procedure B and obtained as colorless oil.  $^1\text{H}$  NMR (600 MHz, Chloroform- $d$ )  $\delta$  7.36 – 7.31 (m, 2H), 7.31-7.27 (m, 2H), 7.20 – 7.16 (m, 1H), 5.79 (tt,  $J = 56.8, 4.4$  Hz, 1H), 2.93 (t,  $J = 7.2$  Hz, 2H), 1.89 – 1.78 (m, 2H), 1.73-1.66 (m, 2H), 1.64 – 1.57 (m, 2H).  $^{13}\text{C}$  NMR (151 MHz,  $\text{CDCl}_3$ )  $\delta$  136.35, 129.29, 128.93, 126.03, 117.09 (t,  $J = 239.0$  Hz), 33.61 (t,  $J = 20.9$  Hz), 33.41, 28.55, 21.25 (t,  $J = 5.5$  Hz).  $^{19}\text{F}$  NMR (565 MHz, Chloroform- $d$ )  $\delta$  -115.89 (dt,  $J = 57.2, 17.8$  Hz). HRMS APCI:  $[\text{M}+\text{H}]^+$  calcd. for  $\text{C}_{11}\text{H}_{15}\text{F}_2\text{S}$ : 217.0857; Found 217.0854

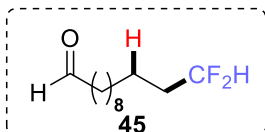

Prepared according to General Procedure B and obtained as colorless oil.  $^1\text{H}$  NMR (600 MHz, Chloroform- $d$ )  $\delta$  9.77 (s, 1H), 5.79 (tt,  $J = 57.0, 4.6$  Hz, 1H), 2.42 (t,  $J = 7.4$  Hz, 2H), 1.87 – 1.76 (m, 2H), 1.66-1.60 (m, 2H), 1.47-1.39 (m, 2H), 1.36 – 1.27 (m, 12H).  $^{13}\text{C}$  NMR (151 MHz,  $\text{CDCl}_3$ )  $\delta$  202.93, 117.50 (t,  $J = 238.7$  Hz), 43.92, 34.08 (t,  $J = 20.6$  Hz), 29.33, 29.32, 29.14, 29.03, 22.10 (t,  $J = 5.4$  Hz), 22.07.  $^{19}\text{F}$  NMR (565 MHz, Chloroform- $d$ )  $\delta$  -115.75 (dt,  $J = 57.0, 17.6$  Hz). The compound characterization was reported in literature and the NMR data matched with previous characterization.<sup>16</sup>

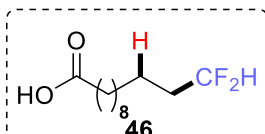

Prepared according to General Procedure B and obtained as colorless oil.  $^1\text{H}$  NMR (600 MHz, Chloroform- $d$ )  $\delta$  5.79 (tt,  $J = 57.0, 4.6$  Hz, 1H), 2.35 (t,  $J = 7.5$  Hz, 2H), 1.89 – 1.74 (m, 2H), 1.67-1.59 (m, 2H), 1.47-1.40 (m, 2H), 1.35 – 1.27 (m, 12H).  $^{13}\text{C}$  NMR (151 MHz,  $\text{CDCl}_3$ )  $\delta$  180.04, 117.50 (t,  $J = 238.7$  Hz), 34.08 (t,  $J = 20.7$  Hz), 34.03, 29.32, 29.18, 29.03, 24.65, 22.10 (t,  $J = 5.5$  Hz).  $^{19}\text{F}$  NMR (565 MHz, Chloroform- $d$ )  $\delta$  -115.73 (dt,  $J = 57.0, 17.5$  Hz). The compound characterization was reported in literature and the NMR data matched with previous characterization.<sup>16</sup>

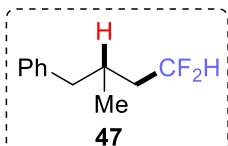

Prepared according to General Procedure B and obtained as colorless oil.  $^1\text{H}$  NMR (600 MHz, Chloroform- $d$ )  $\delta$  7.32-7.27 (m, 2H), 7.23 – 7.19 (m, 1H), 7.17 – 7.12 (m, 2H), 5.95 – 5.72 (m, 1H), 2.64 (dd,  $J = 13.5, 6.8$  Hz, 1H), 2.51 (dd,  $J = 13.5, 7.7$  Hz, 1H), 2.10-1.98 (m, 1H), 1.95-1.82 (m, 1H), 1.74-1.60 (m, 1H), 0.98 (d,  $J = 6.6$  Hz, 3H).  $^{13}\text{C}$  NMR (151 MHz,  $\text{CDCl}_3$ )  $\delta$  139.95, 129.15, 128.35, 126.16, 116.99 (t,  $J = 238.7$  Hz), 43.52, 40.37 (t,

$J = 20.1$  Hz), 29.91 (t,  $J = 5.2$  Hz), 19.61.  $^{19}\text{F}$  NMR (565 MHz, Chloroform- $d$ )  $\delta$  -114.61 (dt,  $J = 56.9, 17.5$  Hz). GC-MS:  $[\text{M}]^+$  calcd. for  $\text{C}_{11}\text{H}_{14}\text{F}_2$ : 184.1064; Found 184.1

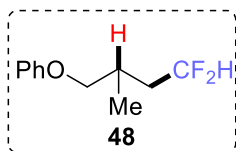

Prepared according to General Procedure B and obtained as colorless oil.  $^1\text{H}$  NMR (600 MHz, Chloroform- $d$ )  $\delta$  7.32 – 7.26 (m, 2H), 6.98–6.92 (m, 1H), 6.91 – 6.86 (m, 2H), 5.99 (tt,  $J = 56.8, 4.8$  Hz, 1H), 3.86 (dd,  $J = 9.1, 5.4$  Hz, 1H), 3.79 (dd,  $J = 9.1, 6.6$  Hz, 1H), 2.30 – 2.21 (m,  $J = 6.7$  Hz, 1H), 2.17–2.06 (m, 1H), 1.89–1.77 (m, 1H), 1.12 (d,  $J = 6.9$  Hz, 3H).  $^{13}\text{C}$  NMR (151 MHz,  $\text{CDCl}_3$ )  $\delta$  158.79, 129.50, 120.88, 116.89 (t,  $J = 238.7$  Hz), 114.47, 72.27, 38.14 (t,  $J = 20.7$  Hz), 28.42 (t,  $J = 5.3$  Hz), 17.16.  $^{19}\text{F}$  NMR (565 MHz, Chloroform- $d$ )  $\delta$  -113.17 – -116.09 (m). GC-MS:  $[\text{M}]^+$  calcd. for  $\text{C}_{11}\text{H}_{14}\text{F}_2\text{O}$ : 200.1013; Found 200.0

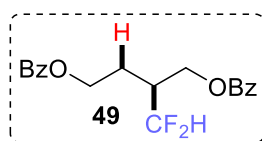

Prepared according to General Procedure B and obtained as colorless oil.  $^1\text{H}$  NMR (600 MHz, Chloroform- $d$ )  $\delta$  8.15–7.92 (m, 4H), 7.61–7.49 (m, 2H), 7.46–7.36 (m, 4H), 6.16 – 5.92 (m, 1H), 4.56–4.43 (m, 4H), 2.61 – 2.48 (m, 1H), 2.25–2.16 (m, 1H), 2.06–1.96 (m, 1H).  $^{13}\text{C}$  NMR (151 MHz,  $\text{CDCl}_3$ )  $\delta$  166.37, 166.12, 133.33, 133.13, 129.89, 129.62, 129.58, 129.55, 128.51, 128.45, 116.68 (t,  $J = 242.9$  Hz), 62.29, 62.12 (t,  $J = 5.7$  Hz), 39.88 (t,  $J = 20.0$  Hz), 24.36 (t,  $J = 4.0$  Hz).  $^{19}\text{F}$  NMR (565 MHz, Chloroform- $d$ )  $\delta$  -121.50 – -125.84 (m). HRMS APCI:  $[\text{M}+\text{H}]^+$  calcd. for  $\text{C}_{19}\text{H}_{19}\text{F}_2\text{O}_4$ : 349.1246; Found 349.1239

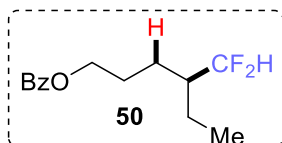

Prepared according to General Procedure B and obtained as colorless oil. 1.2:1 mixture of regioisomers.  $^1\text{H}$  NMR (600 MHz, Chloroform- $d$ )  $\delta$  8.07–7.98 (m, 2H), 7.61–7.55 (m, 1H), 7.50–7.41 (m, 2H), 5.94–5.63 (m, 1H), 5.78 (m, 0.88H), 4.43–4.38 (m, 1.12H), 4.35–4.31 (t,  $J = 6.5$  Hz, 1H), 2.06–1.97 (m, 1H), 1.91 – 1.73 (m, 2.26H), 1.72 – 1.63 (m, 0.74H), 1.62 – 1.41 (m, 4H), 0.96 (dt,  $J = 24.7, 7.4$  Hz, 3H).  $^{13}\text{C}$  NMR (151 MHz,  $\text{CDCl}_3$ )  $\delta$  166.62, 166.50, 133.02, 132.94, 130.31, 130.16, 129.54, 128.42, 128.39, 118.80 (t,  $J = 242.5$  Hz), 118.53 (t,  $J = 242.6$  Hz), 64.86, 62.78, 43.12 (t,  $J = 18.5$  Hz), 39.25 (t,  $J = 18.9$  Hz), 30.19 (dd,  $J = 5.7, 3.5$  Hz), 26.74 (t,  $J = 4.6$  Hz), 26.17, 23.62 (t,  $J = 4.5$  Hz), 20.76 (dd,  $J = 6.0, 4.4$  Hz), 19.96, 14.17, 11.15.  $^{19}\text{F}$  NMR (565 MHz, Chloroform- $d$ )  $\delta$  -112.85 – -131.83 (m). HRMS APCI:  $[\text{M}+\text{H}]^+$  calcd. for  $\text{C}_{14}\text{H}_{19}\text{F}_2\text{O}_2$ : 257.1348; Found 257.1344

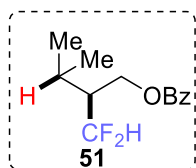

Prepared according to General Procedure B and obtained as colorless oil.  $^1\text{H}$  NMR (600 MHz, Chloroform- $d$ )  $\delta$  8.06 – 7.99 (m, 2H), 7.59 – 7.55 (m, 1H), 7.47–7.42 (m, 2H), 6.01 (td,  $J = 55.9, 3.5$  Hz, 1H), 4.55 – 4.44 (m, 2H), 2.18–2.07 (m, 2H), 1.11 (d,  $J = 6.7$  Hz, 3H), 1.07 (d,  $J = 6.5$  Hz, 3H).  $^{13}\text{C}$  NMR (151 MHz,  $\text{CDCl}_3$ )  $\delta$  166.34, 133.14, 129.93, 129.61, 128.46, 117.24 (t,  $J = 243.0$  Hz), 60.72 (t,  $J = 5.7$  Hz), 47.46 (t,  $J = 18.1$  Hz), 25.53 (t,  $J = 3.7$  Hz), 20.62, 19.77.  $^{19}\text{F}$  NMR (565 MHz, Chloroform- $d$ )  $\delta$  -117.23 – -125.25 (m). HRMS APCI:  $[\text{M}+\text{H}]^+$  calcd. for  $\text{C}_{13}\text{H}_{17}\text{F}_2\text{O}_2$ : 243.1191; Found 243.1188

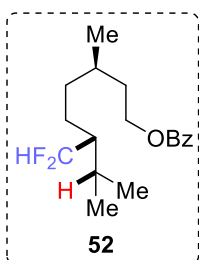

Prepared according to General Procedure B and obtained as colorless oil. 1:1 mixture of diastereomers.  $^1\text{H}$  NMR (600 MHz, Chloroform-*d*)  $\delta$  8.04 (d,  $J$  = 7.7 Hz, 2H), 7.55 (t,  $J$  = 7.4 Hz, 1H), 7.44 (t,  $J$  = 7.7 Hz, 2H), 5.78 (td,  $J$  = 56.5, 3.6 Hz, 1H), 4.43 – 4.30 (m, 2H), 1.97-1.87 (m, 1H), 1.87-1.79 (m, 1H), 1.65 – 1.53 (m, 4H), 1.53 – 1.40 (m, 2H), 1.38 – 1.30 (m, 1H), 1.01-0.97 (m, 3H), 0.97-0.91 (m, 6H).  $^{13}\text{C}$  NMR (151 MHz,  $\text{CDCl}_3$ )  $\delta$  166.68, 132.85, 130.46, 129.54, 128.34, 119.00 (t,  $J$  = 242.4 Hz), 118.93 (t,  $J$  = 242.3 Hz), 63.40, 63.38, 47.83 (t,  $J$  = 17.4 Hz), 35.51, 35.45, 35.38, 30.40, 30.36, 27.11 (dd,  $J$  = 5.7, 3.6 Hz), 27.01 (dd,  $J$  = 5.8, 3.5 Hz), 21.94 (t,  $J$  = 4.4 Hz), 21.89 (t,  $J$  = 4.5 Hz), 19.75, 19.71, 19.58, 19.41, 19.39.  $^{19}\text{F}$  NMR (565 MHz, Chloroform-*d*)  $\delta$  -116.39 – -124.91 (m). HRMS APCI:  $[\text{M}+\text{H}]^+$  calcd. for  $\text{C}_{18}\text{H}_{27}\text{F}_2\text{O}_2$ : 313.1974; Found 313.1969

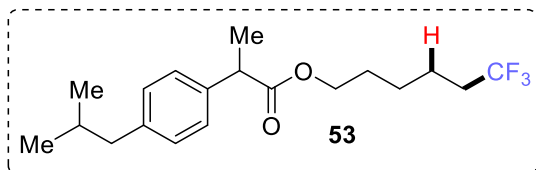

Prepared according to General Procedure A and obtained as colorless oil.  $^1\text{H}$  NMR (600 MHz, Chloroform-*d*)  $\delta$  7.19 (d,  $J$  = 8.1 Hz, 2H), 7.09 (d,  $J$  = 8.1 Hz, 2H), 4.14 – 3.98 (m, 2H), 3.68 (q,  $J$  = 7.2 Hz, 1H), 2.44 (d,  $J$  = 7.2 Hz, 2H), 2.04 – 1.92 (m, 2H), 1.89-1.79 (m, 1H), 1.60-1.56 (m, 2H), 1.53 – 1.47 (m, 5H), 1.32-1.25 (m, 2H), 0.89 (d,  $J$  = 6.6 Hz, 6H).  $^{13}\text{C}$  NMR (151 MHz,  $\text{CDCl}_3$ )  $\delta$  174.76, 140.55, 137.83, 129.30, 127.14, 127.09 (q,  $J$  = 276.3 Hz), 64.13, 45.19, 45.01, 33.58 (q,  $J$  = 28.4 Hz), 30.19, 28.16, 24.99, 22.36, 21.48 (q,  $J$  = 3.0 Hz), 18.35.  $^{19}\text{F}$  NMR (565 MHz, Chloroform-*d*)  $\delta$  -66.42 (t,  $J$  = 10.9 Hz). HRMS APCI:  $[\text{M}+\text{H}]^+$  calcd. for  $\text{C}_{19}\text{H}_{28}\text{F}_3\text{O}_2$ : 345.2036; Found 345.2031

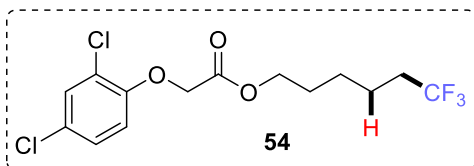

Prepared according to General Procedure A and obtained as colorless oil.  $^1\text{H}$  NMR (600 MHz, Chloroform-*d*)  $\delta$  7.32 (d,  $J$  = 2.5 Hz, 1H), 7.09 (dd,  $J$  = 8.8, 2.6 Hz, 1H), 6.71 (d,  $J$  = 8.8 Hz, 1H), 4.62 (s, 2H), 4.13 (t,  $J$  = 6.5 Hz, 2H), 2.04 – 1.94 (m, 2H), 1.64 – 1.56 (m, 2H), 1.52-1.46 (m, 2H), 1.36-1.26 (m, 2H).  $^{13}\text{C}$  NMR (151 MHz,  $\text{CDCl}_3$ )  $\delta$  168.14, 152.41, 130.38, 127.56, 127.14, 127.06 (q,  $J$  = 276.4 Hz), 124.29, 114.67, 66.38, 65.11, 33.56 (q,  $J$  = 28.5 Hz), 28.14, 24.99, 21.54 (q,  $J$  = 2.9 Hz).  $^{19}\text{F}$  NMR (565 MHz, Chloroform-*d*)  $\delta$  -66.36 (t,  $J$  = 10.9 Hz). HRMS APCI:  $[\text{M}+\text{H}]^+$  calcd. for  $\text{C}_{14}\text{H}_{16}\text{Cl}_2\text{F}_3\text{O}_3$ : 359.0423; Found 359.0427

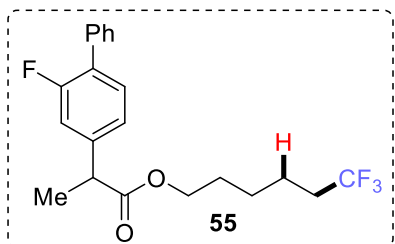

Prepared according to General Procedure A and obtained as colorless oil.  $^1\text{H}$  NMR (600 MHz, Chloroform-*d*)  $\delta$  7.57-7.50 (m, 2H), 7.47 – 7.41 (m, 2H), 7.41 – 7.33 (m, 2H), 7.17 – 7.09 (m, 2H), 4.15-4.07 (m, 2H), 3.75 (q,  $J$  = 7.1 Hz, 1H), 2.08 – 1.96 (m, 2H), 1.67-1.59 (m, 2H), 1.57 – 1.52 (m, 5H), 1.40-1.32 (m, 2H).  $^{13}\text{C}$  NMR (151 MHz,  $\text{CDCl}_3$ )  $\delta$  173.98, 159.68 (d,  $J$  = 248.4 Hz), 141.86 (d,  $J$  = 7.7 Hz), 135.46, 130.78 (d,  $J$  = 3.9 Hz), 128.93 (d,  $J$  = 3.1 Hz), 128.47, 127.83 (q,  $J$  = 13.6 Hz), 127.08 (q,  $J$  = 276.2 Hz), 123.52 (d,  $J$  = 3.3 Hz),

115.23 (d,  $J = 23.5$  Hz), 64.54, 45.08, 33.59 (q,  $J = 28.4$  Hz), 28.17, 25.06, 21.53 (q,  $J = 3.0$  Hz), 18.28.  $^{19}\text{F}$  NMR (565 MHz, Chloroform- $d$ )  $\delta$  -66.36 (t,  $J = 11.0$  Hz), -117.67 (dd,  $J = 13.0$ , 8.8 Hz). HRMS APCI:  $[\text{M}+\text{H}]^+$  calcd. for  $\text{C}_{21}\text{H}_{23}\text{F}_4\text{O}_2$ : 383.1629; Found 383.1623

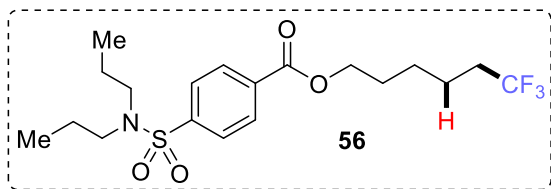

Prepared according to General Procedure A and obtained as colorless oil.  $^1\text{H}$  NMR (600 MHz, Chloroform- $d$ )  $\delta$  8.15 (d,  $J = 8.4$  Hz, 2H), 7.88 (d,  $J = 8.4$  Hz, 2H), 4.37 (t,  $J = 6.5$  Hz, 2H), 3.16 – 3.06 (m, 4H), 2.17 – 2.06 (m, 2H), 1.86 – 1.78 (m, 2H), 1.68–1.62 (m, 2H), 1.60–1.50 (m, 6H), 0.87 (t,  $J = 7.4$  Hz, 6H).  $^{13}\text{C}$  NMR (151 MHz,  $\text{CDCl}_3$ )  $\delta$  165.28, 144.32, 133.59, 130.19, 127.11 (q,  $J = 276.3$  Hz), 127.04, 65.24, 49.95, 33.62 (q,  $J = 28.5$  Hz), 28.34, 25.26, 21.95, 21.67 (q,  $J = 3.0$  Hz), 11.16.  $^{19}\text{F}$  NMR (565 MHz, Chloroform- $d$ )  $\delta$  -66.35 (t,  $J = 11.0$  Hz). HRMS APCI:  $[\text{M}+\text{H}]^+$  calcd. for  $\text{C}_{19}\text{H}_{29}\text{F}_3\text{NO}_4\text{S}$ : 424.1764; Found 424.1754

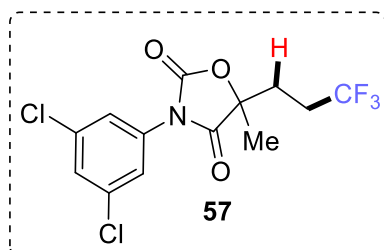

Prepared according to General Procedure A and obtained as white solid.  $^1\text{H}$  NMR (600 MHz, Chloroform- $d$ )  $\delta$  7.42–7.32 (m, 3H), 2.30 – 2.24 (m, 1H), 2.19 – 2.08 (m, 3H), 1.64 (s, 3H).  $^{13}\text{C}$  NMR (151 MHz,  $\text{CDCl}_3$ )  $\delta$  172.71, 151.80, 135.70, 132.29, 129.26, 126.06 (q,  $J = 276.2$  Hz), 123.65, 84.08, 29.37 (q,  $J = 3.2$  Hz), 28.23 (q,  $J = 30.4$  Hz), 22.25.  $^{19}\text{F}$  NMR (565 MHz, Chloroform- $d$ )  $\delta$  -66.40 (t,  $J = 9.8$  Hz). m.p.: 114–115  $^\circ\text{C}$ . HRMS APCI:  $[\text{M}+\text{H}]^+$  calcd. for  $\text{C}_{13}\text{H}_{11}\text{Cl}_2\text{F}_3\text{NO}_2$ : 356.0063; Found 356.0067

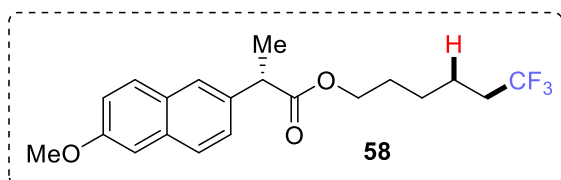

Prepared according to General Procedure A and obtained as colorless oil.  $^1\text{H}$  NMR (600 MHz, Chloroform- $d$ )  $\delta$  7.70 (d,  $J = 8.7$  Hz, 2H), 7.67 – 7.64 (m, 1H), 7.39 (dd,  $J = 8.5$ , 1.8 Hz, 1H), 7.14 (dd,  $J = 8.9$ , 2.6 Hz, 1H), 7.11 (d,  $J = 2.5$  Hz, 1H), 4.12 – 4.02 (m, 2H), 3.91 (s, 3H), 3.84 (q,  $J = 7.1$  Hz, 1H), 1.89 – 1.82 (m, 2H), 1.58–1.56 (m, 4H), 1.48–1.41 (m, 2H), 1.26 – 1.20 (m, 3H).  $^{13}\text{C}$  NMR (151 MHz,  $\text{CDCl}_3$ )  $\delta$  174.68, 157.68, 135.76, 133.69, 129.22, 128.92, 127.11, 127.05 (q,  $J = 276.5$  Hz) 126.20, 125.94, 119.04, 105.57, 64.25, 55.31, 45.51, 33.48 (q,  $J = 28.5$  Hz), 28.19, 24.99, 21.48 (q,  $J = 3.0$  Hz), 18.30.  $^{19}\text{F}$  NMR (565 MHz, Chloroform- $d$ )  $\delta$  -66.44 (t,  $J = 10.9$  Hz). HRMS APCI:  $[\text{M}+\text{H}]^+$  calcd. for  $\text{C}_{20}\text{H}_{24}\text{F}_3\text{O}_3$ : 369.1672; Found 369.1665

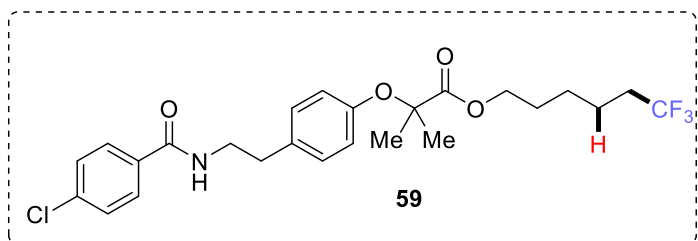

Prepared according to General Procedure A and obtained as colorless oil.  $^1\text{H}$  NMR (600 MHz, Chloroform- $d$ )  $\delta$  7.65 – 7.59 (m, 2H), 7.43 – 7.35 (m, 2H), 7.14 – 7.03

(m, 2H), 6.89 – 6.75 (m, 2H), 6.13-6.02 (m, 1H), 5.30 (s, 6H), 4.16 (t,  $J = 6.5$  Hz, 2H), 3.66 (q,  $J = 6.6$  Hz, 2H), 2.85 (t,  $J = 6.9$  Hz, 2H), 2.04 – 1.94 (m, 2H), 1.66 – 1.63 (m, 2H), 1.56 – 1.48 (m, 2H), 1.33 (p,  $J = 7.9$  Hz, 2H).  $^{13}\text{C}$  NMR (151 MHz,  $\text{CDCl}_3$ )  $\delta$  174.30, 166.37, 154.20, 137.66, 132.99, 132.29, 129.48, 128.83, 128.24, 127.05 (q,  $J = 276.3$  Hz), 119.26, 79.12, 64.97, 53.43, 41.23, 34.72, 33.55 (q,  $J = 28.5$  Hz), 28.09, 25.38, 25.01, 21.50 (q,  $J = 3.0$  Hz).  $^{19}\text{F}$  NMR (565 MHz, Chloroform-*d*)  $\delta$  -66.33 (t,  $J = 10.9$  Hz). HRMS APCI:  $[\text{M}+\text{H}]^+$  calcd. for  $\text{C}_{25}\text{H}_{30}\text{NF}_3\text{ClO}_4$ : 500.1810; Found 500.1816

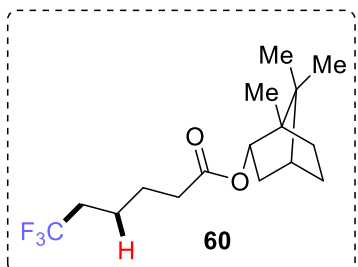

Prepared according to General Procedure A and obtained as colorless oil.  $^1\text{H}$  NMR (600 MHz, Chloroform-*d*)  $\delta$  4.93-4.87 (m, 1H), 2.44 – 2.30 (m, 3H), 2.19 – 2.01 (m, 2H), 1.94-1.87 (m, 1H), 1.78 – 1.66 (m, 4H), 1.66 – 1.59 (m, 2H), 1.35-1.28 (m, 1H), 1.27 – 1.19 (m, 2H), 0.91 (s, 3H), 0.88 (s, 3H), 0.83 (s, 3H).  $^{13}\text{C}$  NMR (151 MHz,  $\text{CDCl}_3$ )  $\delta$  173.36, 173.33, 127.05 (q,  $J = 276.8$  Hz), 80.01, 79.98, 48.77, 48.74, 47.83, 47.80, 44.91, 44.88, 36.86, 36.84, 34.17, 34.14, 33.52 (q,  $J = 28.7$  Hz), 28.05, 28.03, 27.13, 27.11, 24.16, 24.14, 21.47, 19.72, 19.69, 18.85, 18.83, 13.50, 13.48.  $^{19}\text{F}$  NMR (565 MHz, Chloroform-*d*)  $\delta$  -66.39 (t,  $J = 10.9$  Hz). HRMS APCI:  $[\text{M}+\text{NH}_4]^+$  calcd. for  $\text{C}_{16}\text{H}_{29}\text{F}_3\text{NO}_2$ : 324.2145; Found 234.2143

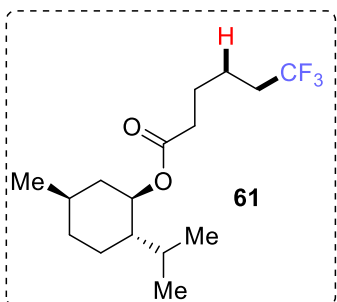

Prepared according to General Procedure A and obtained as colorless oil.  $^1\text{H}$  NMR (600 MHz, Chloroform-*d*)  $\delta$  4.69 (td,  $J = 10.9, 4.4$  Hz, 1H), 2.36 – 2.29 (m, 2H), 2.14 – 2.05 (m, 2H), 2.01-1.95 (m, 1H), 1.88-1.81 (m, 1H), 1.73-1.65 (m, 4H), 1.63 – 1.58 (m, 2H), 1.52-1.44 (m, 1H), 1.40-1.34 (m, 1H), 1.26 – 1.18 (m, 1H), 1.10-1.01 (m, 1H), 0.93-0.87 (m, 7H), 0.76 (d,  $J = 7.0$  Hz, 3H).  $^{13}\text{C}$  NMR (151 MHz,  $\text{CDCl}_3$ )  $\delta$  172.62, 127.03 (q,  $J = 276.2$  Hz), 74.28, 47.02, 40.94, 34.25, 34.18, 33.50 (q,  $J = 28.4$  Hz), 31.39, 26.32, 24.13, 23.41, 22.01, 21.45 (q,  $J = 3.2$  Hz), 20.74, 16.25.  $^{19}\text{F}$  NMR (565 MHz, Chloroform-*d*)  $\delta$  -66.43 (t,  $J = 10.8$  Hz). HRMS APCI:  $[\text{M}+\text{NH}_4]^+$  calcd. for  $\text{C}_{16}\text{H}_{31}\text{F}_3\text{NO}_2$ : 326.2301; Found 326.2292

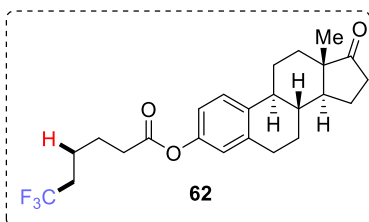

Prepared according to General Procedure A and obtained as white solid.  $^1\text{H}$  NMR (600 MHz, Chloroform-*d*)  $\delta$  7.24-7.20 (m, 1H), 6.79-6.75 (m, 1H), 6.75-6.71 (m, 1H), 2.88 – 2.80 (m, 2H), 2.51 (t,  $J = 7.3$  Hz, 2H), 2.47-2.40 (m, 1H), 2.37-2.31 (m, 1H), 2.26-2.18 (m, 1H), 2.13-2.03 (m, 3H), 2.02 – 1.91 (m, 2H), 1.91-1.87 (m, 1H), 1.76 (p,  $J = 7.5$  Hz, 2H), 1.66 – 1.60 (m, 2H), 1.59 – 1.36 (m, 6H), 0.84 (s, 3H).  $^{13}\text{C}$  NMR (151 MHz,  $\text{CDCl}_3$ )  $\delta$  171.83, 148.47, 138.08, 137.47, 127.0 (q,  $J = 276.3$  Hz), 126.45, 121.51, 118.68, 50.44, 47.96, 44.16, 38.00, 35.87, 33.85, 33.50 (q,  $J = 28.6$  Hz), 31.56, 29.41, 26.34, 25.76, 23.97, 21.60, 21.47 (q,  $J = 3.1$  Hz), 13.84.  $^{19}\text{F}$  NMR

(565 MHz, Chloroform-*d*)  $\delta$  -66.32 (t,  $J$  = 10.8 Hz). m.p.: 94-95 °C. HRMS APCI:  $[M+H]^+$  calcd. for C<sub>24</sub>H<sub>30</sub>F<sub>3</sub>O<sub>3</sub>: 423.2142; Found 423.2150

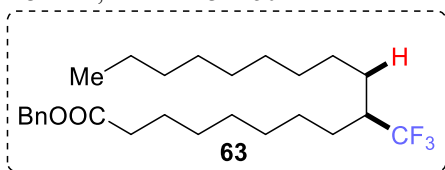

Prepared according to General Procedure A and obtained as colorless oil.

1:1 mixture of regioisomers. <sup>1</sup>H NMR (600 MHz, Chloroform-*d*)  $\delta$  7.43 – 7.30 (m, 5H), 5.11 (s, 2H), 2.35 (t,  $J$  = 7.5 Hz, 2H), 2.01 – 1.93 (m, 1H), 1.67-1.61 (m, 2H), 1.57-1.52 (m, 2H), 1.42 – 1.26 (m, 24H), 0.88 (t,  $J$  = 6.9 Hz, 3H). <sup>13</sup>C NMR (151 MHz, CDCl<sub>3</sub>)  $\delta$  173.68, 173.64, 136.14, 136.13, 128.79 (q,  $J$  = 280.6 Hz), 128.55, 128.19, 66.10, 66.08, 42.56 (q,  $J$  = 24.6 Hz), 34.32, 34.29, 31.89, 31.85, 29.72, 29.65, 29.55, 29.53, 29.42, 29.38, 29.30, 29.25, 29.21, 29.18, 29.08, 29.05, 29.03, 27.85, 27.84, 27.82, 26.88, 26.86, 26.82, 24.93, 24.90, 22.68, 22.66, 14.11. <sup>19</sup>F NMR (565 MHz, Chloroform-*d*)  $\delta$  -70.05– -70.18 (m, 3F). HRMS APCI:  $[M+H]^+$  calcd. for C<sub>26</sub>H<sub>42</sub>F<sub>3</sub>O<sub>2</sub>: 443.3131; Found 443.3131

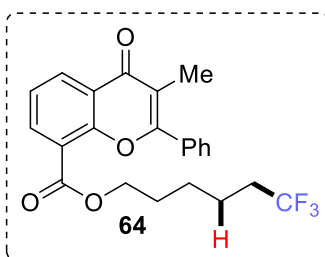

Prepared according to General Procedure A and obtained as colorless oil. <sup>1</sup>H NMR

(600 MHz, Chloroform-*d*)  $\delta$  8.47 (dd,  $J$  = 7.9, 1.8 Hz, 1H), 8.26 (dd,  $J$  = 7.5, 1.8 Hz, 1H), 7.77 (dt,  $J$  = 6.8, 2.2 Hz, 2H), 7.54 (dd,  $J$  = 5.1, 1.9 Hz, 3H), 7.45 (t,  $J$  = 7.7 Hz, 1H), 4.36 (t,  $J$  = 6.5 Hz, 2H), 2.23 (s, 3H), 2.02 – 1.92 (m, 2H), 1.76 – 1.70 (m, 2H), 1.55 – 1.48 (m, 2H), 1.44-1.35 (m, 2H). <sup>13</sup>C NMR (151 MHz, CDCl<sub>3</sub>)  $\delta$  178.27, 164.63, 161.08, 154.45, 136.16, 133.11, 130.85, 130.51, 129.31, 128.44, 127.05 (q,  $J$  = 276.3 Hz), 124.05, 123.34, 120.72, 117.76, 65.22, 33.56 (q,  $J$  = 28.4 Hz), 28.31, 25.22, 21.57 (q,  $J$  = 3.0 Hz), 11.75. <sup>19</sup>F NMR (565 MHz, Chloroform-*d*)  $\delta$  -66.38 (t,  $J$  = 11.0 Hz). HRMS APCI:  $[M+H]^+$  calcd. for C<sub>23</sub>H<sub>22</sub>F<sub>3</sub>O<sub>4</sub>: 419.1465; Found 419.1457

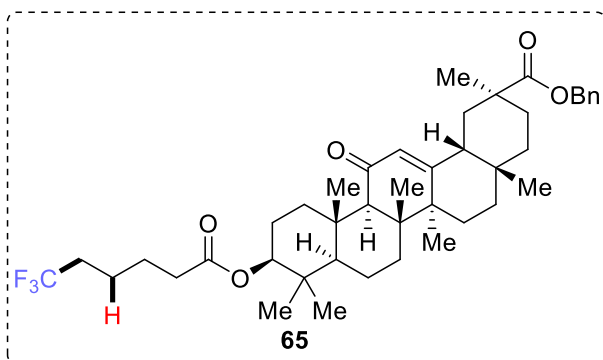

Prepared according to General Procedure A and obtained

as white solid. <sup>1</sup>H NMR (600 MHz, Chloroform-*d*)  $\delta$  7.50 – 7.29 (m, 5H), 5.54 (s, 1H), 5.20 (d,  $J$  = 12.2 Hz, 1H), 5.09 (d,  $J$  = 12.2 Hz, 1H), 4.53 (dd,  $J$  = 11.8, 4.7 Hz, 1H), 2.83-2.76 (m, 1H), 2.38 – 2.30 (m, 3H), 2.15-2.07 (m, 2H), 2.06 – 1.97 (m, 3H), 1.97-1.91 (m, 1H), 1.84-1.76 (m, 1H), 1.74 – 1.59 (m, 9H), 1.49 – 1.26 (m, 9H), 1.16 (s, 6H), 1.11 (s, 3H), 1.09 – 0.97 (m, 2H), 0.91-0.85 (m, 6H), 0.82-0.76 (m, 1H), 0.73 (s, 3H). <sup>13</sup>C NMR (151 MHz, CDCl<sub>3</sub>)  $\delta$  199.99, 176.22, 172.81, 169.11, 136.14, 128.63, 128.47, 128.31, 128.26, 127.03 (q,  $J$  = 276.3 Hz), 80.72, 66.23, 61.68, 55.01, 48.24, 45.37, 44.00, 43.18, 41.06, 38.78, 38.08, 37.65, 36.93, 34.25, 33.49 (q,  $J$  = 28.4 Hz), 32.70, 31.79, 31.18, 28.42, 28.29, 28.08, 26.46, 26.40, 24.14, 23.59, 23.31, 21.50 (q,  $J$  = 3.1 Hz), 18.68, 17.38, 16.75, 16.41. <sup>19</sup>F NMR (565 MHz, Chloroform-*d*)  $\delta$  -66.36 (t,  $J$  = 11.0 Hz). m.p.: 184-185 °C HRMS APCI:  $[M+H]^+$  calcd. for C<sub>43</sub>H<sub>63</sub>F<sub>3</sub>O<sub>5</sub>: 713.4387; Found 713.4375



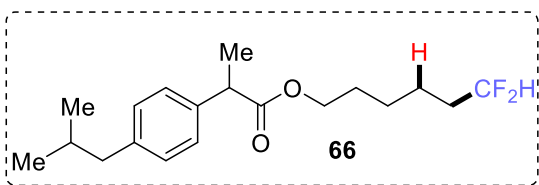

Prepared according to General Procedure B and obtained as colorless oil.  $^1\text{H}$  NMR (600 MHz, Chloroform-*d*)  $\delta$  7.22 – 7.17 (m, 2H), 7.11 – 7.06 (m, 2H), 5.74 (tt,  $J$  = 56.9, 4.5 Hz, 1H), 4.13 – 4.00 (m, 2H), 3.68 (q,  $J$  = 7.1 Hz, 1H), 2.44 (d,  $J$  = 7.1 Hz, 2H), 1.90-1.80 (m, 1H), 1.80 – 1.69 (m, 2H), 1.60 – 1.57 (m, 2H), 1.48 (d,  $J$  = 7.2 Hz, 3H), 1.44 – 1.35 (m, 2H), 1.30-1.25 (m, 2H), 0.89 (d,  $J$  = 6.6 Hz, 6H).  $^{13}\text{C}$  NMR (151 MHz,  $\text{CDCl}_3$ )  $\delta$  174.79, 140.54, 137.85, 129.30, 127.14, 117.21 (t,  $J$  = 238.7 Hz), 64.27, 45.19, 45.01, 33.91 (t,  $J$  = 20.7 Hz), 30.19, 28.31, 25.32, 22.37, 21.68 (t,  $J$  = 5.5 Hz), 18.39.  $^{19}\text{F}$  NMR (565 MHz, Chloroform-*d*)  $\delta$  -115.86 (dt,  $J$  = 57.0, 17.9 Hz). HRMS APCI:  $[\text{M}+\text{H}]^+$  calcd. for  $\text{C}_{19}\text{H}_{29}\text{F}_2\text{O}_2$ : 327.2130; Found 327.2125

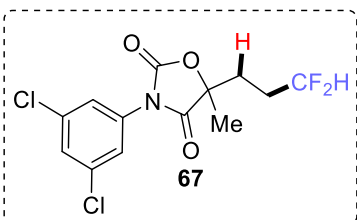

Prepared according to General Procedure B and obtained as white solid.  $^1\text{H}$  NMR (600 MHz, Chloroform-*d*)  $\delta$  7.40-7.33 (m, 3H), 5.83 (tt,  $J$  = 56.1, 3.9 Hz, 1H), 2.13 – 2.05 (m, 2H), 2.06 – 1.95 (m, 1H), 1.90 – 1.79 (m, 1H), 1.63 (s, 3H).  $^{13}\text{C}$  NMR (151 MHz,  $\text{CDCl}_3$ )  $\delta$  173.07, 152.03, 135.65, 132.41, 129.18, 123.71, 115.58 (t,  $J$  = 240.2 Hz), 84.80, 29.08 (t,  $J$  = 5.7 Hz), 28.02 (t,  $J$  = 22.2 Hz), 22.40.  $^{19}\text{F}$  NMR (565 MHz, Chloroform-*d*)  $\delta$  -116.87 (dt,  $J$  = 56.1, 17.0 Hz). m.p.: 121-122 °C. HRMS APCI:  $[\text{M}+\text{H}]^+$  calcd. for  $\text{C}_{13}\text{H}_{12}\text{Cl}_2\text{F}_2\text{NO}_3$ : 338.0157; Found 338.0161

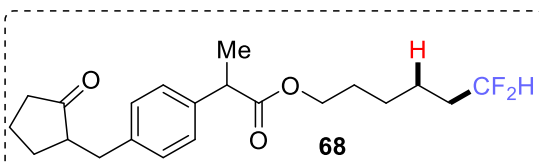

Prepared according to General Procedure B and obtained as colorless oil.  $^1\text{H}$  NMR (600 MHz, Chloroform-*d*)  $\delta$  7.21 (d,  $J$  = 7.9 Hz, 2H), 7.12 (d,  $J$  = 7.9 Hz, 2H), 5.75 (tt,  $J$  = 56.9, 4.4 Hz, 1H), 4.06 (tt,  $J$  = 8.1, 4.1 Hz, 2H), 3.68 (q,  $J$  = 7.2 Hz, 1H), 3.12 (dd,  $J$  = 14.0, 4.2 Hz, 1H), 2.51 (dd,  $J$  = 13.9, 9.5 Hz, 1H), 2.38 – 2.29 (m, 2H), 2.14 – 2.05 (m, 2H), 1.99-1.92 (m, 1H), 1.81 – 1.69 (m, 3H), 1.61 – 1.53 (m, 3H), 1.48 (d,  $J$  = 7.2 Hz, 3H), 1.44-1.37 (m, 2H), 1.34 – 1.27 (m, 2H).  $^{13}\text{C}$  NMR (151 MHz,  $\text{CDCl}_3$ )  $\delta$  220.18, 174.65, 138.87, 138.45, 129.11, 129.09, 127.52, 117.18 (t,  $J$  = 238.8 Hz), 64.35, 50.97, 45.17, 38.18, 35.19, 33.90 (t,  $J$  = 20.8 Hz), 29.24, 28.29, 25.33, 21.66 (t,  $J$  = 5.5 Hz), 20.53, 18.41.  $^{19}\text{F}$  NMR (565 MHz, Chloroform-*d*)  $\delta$  -115.86 (dt,  $J$  = 56.7, 17.7 Hz). HRMS APCI:  $[\text{M}+\text{H}]^+$  calcd. for  $\text{C}_{21}\text{H}_{29}\text{F}_2\text{O}_3$ : 367.2079; Found 367.2075

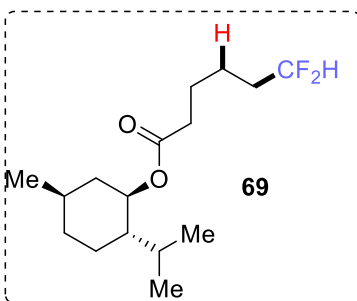

Prepared according to General Procedure B and obtained as colorless oil.  $^1\text{H}$  NMR (600 MHz, Chloroform-*d*)  $\delta$  5.80 (tt,  $J$  = 56.8, 4.5 Hz, 1H), 4.69 (td,  $J$  = 10.9, 4.4 Hz, 1H), 2.34 – 2.29 (m, 2H), 2.00-1.94 (m, 1H), 1.90 – 1.79 (m, 3H), 1.72 – 1.64 (m, 4H), 1.53-1.45 (m, 3H), 1.39 – 1.34 (m, 1H), 1.10-1.01 (m, 1H), 1.00-0.93 (m, 1H), 0.92 – 0.85 (m, 7H), 0.76 (d,  $J$  = 6.9 Hz, 3H).  $^{13}\text{C}$  NMR (151 MHz,  $\text{CDCl}_3$ )  $\delta$  172.83, 117.10 (t,  $J$

= 238.9 Hz), 74.18, 47.02, 40.95, 34.36, 34.26, 33.78 (t,  $J = 20.8$  Hz), 31.39, 26.31, 24.50, 23.42, 22.02, 21.63 (t,  $J = 5.6$  Hz), 20.75, 16.27.  $^{19}\text{F}$  NMR (565 MHz, Chloroform-*d*)  $\delta$  -115.96 (dt,  $J = 56.6, 17.5$  Hz). HRMS APCI:  $[\text{M}+\text{H}]^+$  calcd. for  $\text{C}_{16}\text{H}_{29}\text{F}_2\text{O}_2$ : 291.2130; Found 291.2126

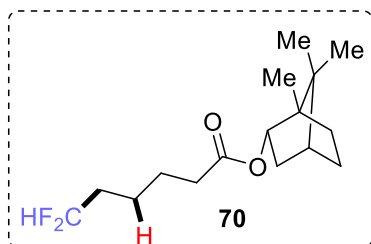

Prepared according to General Procedure B and obtained as colorless oil.  $^1\text{H}$  NMR (600 MHz, Chloroform-*d*)  $\delta$  5.81 (tt,  $J = 56.7, 4.5$  Hz, 1H), 4.89 (dq,  $J = 10.0, 1.9$  Hz, 1H), 2.39-2.31 (m, 3H), 1.94 – 1.81 (m, 3H), 1.77 – 1.67 (m, 4H), 1.55-1.47 (m, 2H), 1.34 – 1.20 (m, 3H), 0.91 (s, 3H), 0.87 (s, 3H), 0.83 (s, 3H).  $^{13}\text{C}$  NMR (151 MHz,  $\text{CDCl}_3$ )  $\delta$  173.56, 117.10 (t,  $J = 238.9$  Hz), 79.89, 48.74, 47.80, 44.88, 36.84, 34.33, 33.79 (t,  $J = 21.0$  Hz), 28.04, 27.12, 24.51, 21.64 (t,  $J = 5.5$  Hz), 19.70, 18.84, 13.50.  $^{19}\text{F}$  NMR (565 MHz, Chloroform-*d*)  $\delta$  -115.93 (dt,  $J = 57.1, 18.0$  Hz). HRMS APCI:  $[\text{M}+\text{H}]^+$  calcd. for  $\text{C}_{16}\text{H}_{27}\text{F}_2\text{O}_2$ : 289.1974; Found 289.1972

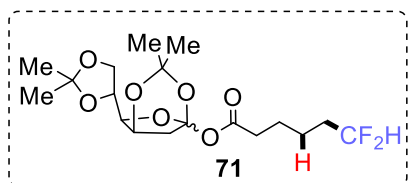

Prepared according to General Procedure B and obtained as colorless oil.  $^1\text{H}$  NMR (600 MHz, Chloroform-*d*)  $\delta$  6.14 (s, 1H), 5.82 (tt,  $J = 56.7, 4.4$  Hz, 1H), 4.86 (dd,  $J = 5.9, 3.6$  Hz, 1H), 4.69 (d,  $J = 5.8$  Hz, 1H), 4.44-4.37 (m, 1H), 4.12-4.07 (m, 1H), 4.07-3.97 (m, 2H), 2.40-2.27 (m, 2H), 1.91-1.79 (m, 2H), 1.69 (p,  $J = 7.5$  Hz, 1H), 1.53 – 1.47 (m, 5H), 1.46 (s, 3H), 1.38 (s, 3H), 1.35 (s, 3H).  $^{13}\text{C}$  NMR (151 MHz,  $\text{CDCl}_3$ )  $\delta$  171.61, 117.00 (t,  $J = 239.0$  Hz), 113.32, 109.38, 100.74, 85.07, 82.28, 79.32, 72.87, 66.82, 33.90, 33.71 (t,  $J = 21.0$  Hz), 26.99, 25.95, 25.13, 24.67, 24.08, 21.50 (t,  $J = 5.6$  Hz).  $^{19}\text{F}$  NMR (564 MHz, Chloroform-*d*)  $\delta$  -116.01 (dt,  $J = 56.8, 17.5$  Hz). HRMS APCI:  $[\text{M}+\text{H}]^+$  calcd. for  $\text{C}_{18}\text{H}_{29}\text{F}_2\text{O}_7$ : 395.1876; Found 395.1873

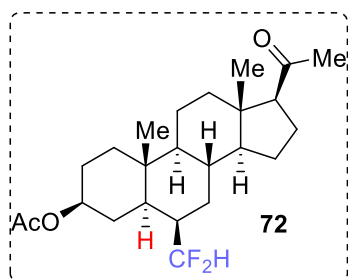

Prepared according to General Procedure B and obtained as colorless oil. 8.1:1 mixture of diastereomers.  $^1\text{H}$  NMR (600 MHz, Chloroform-*d*)  $\delta$  5.91 (td,  $J = 56.6, 7.6$  Hz, 0.89H), 5.69 (td,  $J = 56.4, 2.5$  Hz, 0.11H), 4.66 – 4.51 (m, 1H), 2.46 (t,  $J = 9.0$  Hz, 1H), 2.15 – 2.03 (m, 4H), 2.00 – 1.93 (m, 4H), 1.93-1.86 (m, 1H), 1.86-1.80 (m, 1H), 1.79 – 1.68 (m, 4H), 1.67-1.52 (m, 4H), 1.49 – 1.25 (m, 5H), 1.17 – 0.96 (m, 4H), 0.87 (s, 2.70H), 0.79 (s, 0.33H), 0.703-0.65 (m, 1H), 0.56 (s, 2.67H), 0.55 (s, 0.33H).  $^{13}\text{C}$  NMR (151 MHz,  $\text{CDCl}_3$ )  $\delta$  209.38, 170.69, 118.06 (dd,  $J = 241.7, 239.4$  Hz), 73.86, 63.64, 56.23, 54.54, 45.06 (d,  $J = 7.2$  Hz), 44.12, 43.17 (t,  $J = 18.6$  Hz), 39.17, 38.77, 35.83, 32.84 (d,  $J = 5.1$  Hz), 31.96, 31.78 (dd,  $J = 8.1, 3.6$  Hz), 31.51, 27.56, 24.37, 22.80, 21.42, 21.03, 15.96, 13.52.  $^{19}\text{F}$  NMR (565 MHz, Chloroform-*d*)  $\delta$  -114.20 (dddd,  $J = 287.4, 57.2, 16.4$  Hz), -122.66 – -128.15 (m). HRMS APCI:  $[\text{M}+\text{H}]^+$  calcd. for  $\text{C}_{24}\text{H}_{37}\text{F}_2\text{O}_3$ : 411.2705; Found 411.2703

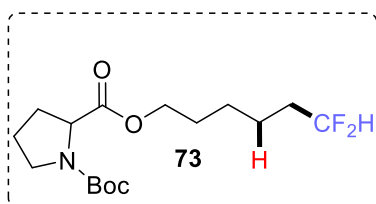

Prepared according to General Procedure B and obtained as colorless oil.  $^1\text{H}$  NMR (600 MHz, Chloroform-*d*)  $\delta$  5.73 (tt,  $J = 57.0, 4.6$  Hz, 1H), 4.28 – 3.99 (m, 3H), 3.53 – 3.29 (m, 2H), 2.20-2.07 (m, 1H), 1.93 – 1.70 (m, 5H), 1.63-1.52 (m, 2H), 1.43 – 1.32 (m, 13H).  $^{13}\text{C}$  NMR (151 MHz,  $\text{CDCl}_3$ )  $\delta$  173.30, 173.08, 154.40, 153.82, 117.25 (t,  $J = 238.9$ Hz), 117.15 (t,  $J = 239.0$ Hz), 79.84, 79.72, 64.61, 64.59, 59.18, 58.88, 46.56, 46.32, 33.91 (t,  $J = 20.8$  Hz), 30.94, 29.98, 28.46, 28.43, 28.32, 25.49, 25.37, 24.32, 23.62, 21.76 (t,  $J = 5.1$  Hz), 21.72 (d,  $J = 5.2$  Hz).  $^{19}\text{F}$  NMR (565 MHz, Chloroform-*d*)  $\delta$  -115.93 (ddt,  $J = 56.8, 26.4, 17.6$  Hz). HRMS APCI:  $[\text{M}+\text{H}]^+$  calcd. for  $\text{C}_{16}\text{H}_{28}\text{F}_2\text{NO}_4$ : 336.1981; Found 336.1981

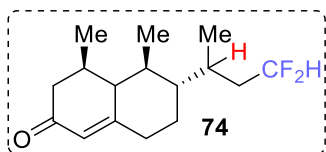

Prepared according to General Procedure B and obtained as colorless oil. 1:1 mixture of diastereomers.  $^1\text{H}$  NMR (600 MHz, Chloroform-*d*)  $\delta$  5.99-5.77 (m, 1H), 5.77-5.73 (m, 1H), 2.51 – 2.40 (m, 1H), 2.39-2.33 (m, 1H), 2.33 – 2.20 (m, 2H), 2.07 – 1.55 (m, 8H), 1.23 – 1.13 (m, 1H), 1.11-1.06 (m, 3H), 0.99 – 0.92 (m, 6H).  $^{13}\text{C}$  NMR (151 MHz,  $\text{CDCl}_3$ )  $\delta$  199.57, 170.51, 124.66, 124.63, 117.21 (t,  $J = 239.0$  Hz), 117.17 (t,  $J = 239.0$  Hz), 42.42, 42.04, 40.84, 40.56, 40.54, 39.27, 39.17, 38.56 (t,  $J = 20.1$  Hz), 38.09 (t,  $J = 20.1$  Hz), 37.62, 37.61, 32.99, 32.99, 32.22-32.18 (m), 32.16-32.13 (m), 29.77, 28.32, 16.93, 16.36, 16.00, 14.95, 14.94.  $^{19}\text{F}$  NMR (565 MHz, Chloroform-*d*)  $\delta$  -111.43 – -119.70 (m). HRMS APCI:  $[\text{M}+\text{H}]^+$  calcd. for  $\text{C}_{16}\text{H}_{25}\text{F}_2\text{O}$ : 271.1868; Found 271.1870. The compound characterization was reported in literature and the NMR data matched with previous characterization.<sup>1</sup>

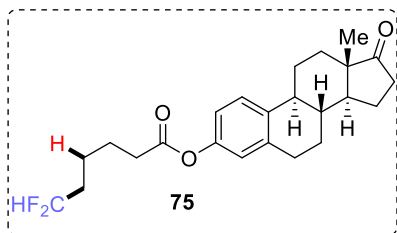

Prepared according to General Procedure B and obtained as white solid.  $^1\text{H}$  NMR (600 MHz, Chloroform-*d*)  $\delta$  7.31-7.27 (m, 1H), 6.88-6.83 (m, 1H), 6.81-6.78 (m, 1H), 5.83 (tt,  $J = 56.8, 4.4$  Hz, 1H), 2.94-2.88 (m, 2H), 2.58 (t,  $J = 7.4$  Hz, 2H), 2.54 – 2.48 (m, 1H), 2.44 – 2.36 (m, 1H), 2.34-2.25 (m, 1H), 2.20-2.10 (m, 1H), 2.10 – 1.98 (m, 2H), 1.98-1.94 (m, 1H), 1.94-1.84 (m, 2H), 1.94-1.79 (m, 2H), 1.69 – 1.41 (m, 9H), 0.91 (s, 3H).  $^{13}\text{C}$  NMR (151 MHz,  $\text{CDCl}_3$ )  $\delta$  172.01, 148.50, 138.04, 137.41, 126.42, 121.52, 118.69, 118.69, 117.03 (t,  $J = 239.0$  Hz), 50.42, 47.94, 44.14, 37.99, 35.85, 34.02, 33.75 (t,  $J = 20.9$  Hz), 31.54, 29.40, 26.33, 25.75, 24.35, 21.63, 21.59 (t,  $J = 5.5$ Hz), 21.58, 21.55, 13.82.  $^{19}\text{F}$  NMR (565 MHz, Chloroform-*d*)  $\delta$  -115.98 (dt,  $J = 56.7, 17.6$  Hz). m.p.: 95-96 °C. HRMS APCI:  $[\text{M}+\text{H}]^+$  calcd. for  $\text{C}_{24}\text{H}_{31}\text{F}_2\text{O}_3$ : 405.2236; Found 405.2244

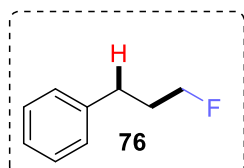

Prepared according to General Procedure C and obtained as colorless oil.  $^1\text{H}$  NMR (600 MHz, Chloroform-*d*)  $\delta$  7.32 – 7.27 (m, 2H), 7.23-7.18 (m, 3H), 4.46 (dt,  $J = 47.2, 6.0$  Hz, 2H), 2.78 – 2.70 (m, 2H), 2.06 – 1.97 (m, 2H).  $^{13}\text{C}$  NMR (151 MHz,  $\text{CDCl}_3$ )  $\delta$  141.11, 128.49, 128.47, 126.04, 83.15 (d,  $J = 164.8$  Hz), 32.04 (d,  $J = 19.9$  Hz), 31.33 (d,  $J = 5.4$  Hz).  $^{19}\text{F}$  NMR (565 MHz, Chloroform-*d*)  $\delta$  -220.01 (tt,  $J = 47.2, 25.3$  Hz). GC-MS:  $[\text{M}]^+$  calcd. for  $\text{C}_9\text{H}_{11}\text{F}$ : 138.0845; Found 138

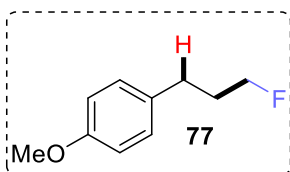

Prepared according to General Procedure C and obtained as colorless oil.  $^1\text{H}$  NMR (600 MHz, Chloroform-*d*)  $\delta$  7.13 – 7.08 (m, 2H), 6.86 – 6.82 (m, 2H), 4.44 (dt,  $J = 47.2, 5.9$  Hz, 2H), 3.79 (s, 3H), 2.72 – 2.66 (m, 2H), 2.04 – 1.90 (m, 2H).  $^{13}\text{C}$  NMR (151 MHz,  $\text{CDCl}_3$ )  $\delta$  157.93, 133.14, 129.39, 113.87, 83.14 (d,  $J = 164.6$  Hz), 55.27, 32.26 (d,  $J = 19.6$  Hz), 30.38 (d,  $J = 5.4$  Hz).  $^{19}\text{F}$  NMR (565 MHz, Chloroform-*d*)  $\delta$  -220.09 (tt,  $J = 47.4, 25.6$  Hz). HRMS APCI: [M-H] $^+$  calcd. for  $\text{C}_{10}\text{H}_{12}\text{FO}$ : 167.0867; Found 167.0865

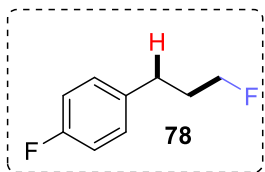

Prepared according to General Procedure C and obtained as colorless oil.  $^1\text{H}$  NMR (600 MHz, Chloroform-*d*)  $\delta$  7.17 – 7.13 (m, 2H), 7.00 – 6.95 (m, 2H), 4.45 (dt,  $J = 47.2, 5.9$  Hz, 2H), 2.76 – 2.70 (m, 2H), 2.05 – 1.90 (m, 2H).  $^{13}\text{C}$  NMR (151 MHz, Chloroform-*d*)  $\delta$  161.39 (d,  $J = 243.8$  Hz), 136.68 (d,  $J = 3.3$  Hz), 129.83 (d,  $J = 7.7$  Hz), 115.21 (d,  $J = 21.0$  Hz), 82.93 (d,  $J = 164.7$  Hz), 32.14 (d,  $J = 19.7$  Hz), 30.53 (d,  $J = 5.4$  Hz).  $^{19}\text{F}$  NMR (565 MHz, Chloroform-*d*)  $\delta$  -117.45 (tt,  $J = 9.7, 5.7$  Hz), -220.32 (tt,  $J = 46.5, 25.5$  Hz). GC-MS: [M] $^+$  calcd. for  $\text{C}_9\text{H}_{10}\text{F}_2$ : 156.0751; Found 156

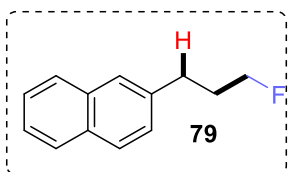

Prepared according to General Procedure C and obtained as colorless oil.  $^1\text{H}$  NMR (600 MHz, Chloroform-*d*)  $\delta$  7.84 – 7.75 (m, 3H), 7.64 (d,  $J = 1.6$  Hz, 1H), 7.44 (dddd,  $J = 18.4, 8.1, 6.8, 1.4$  Hz, 2H), 7.34 (dd,  $J = 8.4, 1.8$  Hz, 1H), 4.49 (dt,  $J = 47.2, 5.9$  Hz, 2H), 2.96 – 2.88 (m, 2H), 2.17 – 2.03 (m, 2H).  $^{13}\text{C}$  NMR (151 MHz,  $\text{CDCl}_3$ )  $\delta$  138.57, 133.60, 132.07, 128.06, 127.62, 127.43, 127.20, 126.61, 126.01, 125.29, 83.10 (d,  $J = 165.0$  Hz), 31.93 (d,  $J = 19.7$  Hz), 31.46 (d,  $J = 5.4$  Hz).  $^{19}\text{F}$  NMR (565 MHz, Chloroform-*d*)  $\delta$  -215.61 – -231.03 (m). GC-MS: [M] $^+$  calcd. for  $\text{C}_{13}\text{H}_{13}\text{F}$ : 188.1001; Found 188

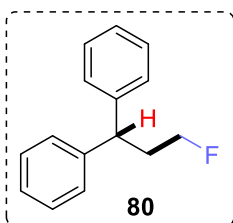

Prepared according to General Procedure C and obtained as colorless oil.  $^1\text{H}$  NMR (600 MHz, Chloroform-*d*)  $\delta$  7.29 (dd,  $J = 8.1, 7.1$  Hz, 4H), 7.25 (dd,  $J = 4.5, 2.9$  Hz, 4H), 7.21 – 7.17 (m, 2H), 4.39 (dt,  $J = 47.0, 6.0$  Hz, 2H), 4.17 (t,  $J = 8.0$  Hz, 1H), 2.49-2.39 (m, 2H).  $^{13}\text{C}$  NMR (151 MHz,  $\text{CDCl}_3$ )  $\delta$  143.86, 128.60, 127.87, 126.44, 82.06 (d,  $J = 164.6$  Hz), 46.43 (d,  $J = 5.4$  Hz), 36.05 (d,  $J = 19.8$  Hz).  $^{19}\text{F}$  NMR (565 MHz, Chloroform-*d*)  $\delta$  -220.88 (tt,  $J = 47.5, 24.2$  Hz). GC-MS: [M] $^+$  calcd. for  $\text{C}_{15}\text{H}_{15}\text{F}$ : 214.1158; Found 214

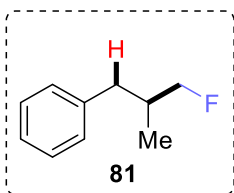

Prepared according to General Procedure C and obtained as colorless oil.  $^1\text{H}$  NMR (600 MHz, Chloroform-*d*)  $\delta$  7.32 – 7.27 (m, 2H), 7.22 – 7.19 (m, 1H), 7.18 – 7.15 (m, 2H), 4.27 (dd,  $J = 47.5, 5.5$  Hz, 2H), 2.77 (dd,  $J = 13.6, 6.5$  Hz, 1H), 2.47 (dd,  $J = 13.5, 8.0$  Hz, 1H), 2.18 – 1.96 (m, 1H), 0.95 (dd,  $J = 6.8, 1.1$  Hz, 3H).  $^{13}\text{C}$  NMR (151 MHz,  $\text{CDCl}_3$ )  $\delta$  139.88, 129.19, 128.31, 126.05, 87.42 (d,  $J = 168.8$  Hz), 38.68 (d,  $J = 5.6$  Hz), 36.09 (d,  $J = 18.2$  Hz), 15.65 (d,  $J = 6.0$  Hz).  $^{19}\text{F}$  NMR (565 MHz, Chloroform-*d*)  $\delta$  -224.20 (td,  $J = 47.3, 20.4$  Hz). GC-MS:  $[\text{M}]^+$  calcd. for  $\text{C}_{10}\text{H}_{13}\text{F}$ : 152.1001; Found 152

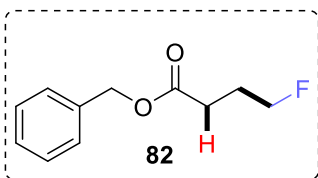

Prepared according to General Procedure C and obtained as colorless oil.  $^1\text{H}$  NMR (600 MHz, Chloroform-*d*)  $\delta$  7.40 – 7.29 (m, 5H), 5.13 (s, 2H), 4.48 (dt,  $J = 47.1, 5.8$  Hz, 2H), 2.52 (t,  $J = 7.4$  Hz, 2H), 2.09-1.99 (m, 2H).  $^{13}\text{C}$  NMR (151 MHz,  $\text{CDCl}_3$ )  $\delta$  172.72, 135.87, 128.60, 128.30, 128.23, 82.89 (d,  $J = 165.3$  Hz), 66.40, 29.96 (d,  $J = 5.1$  Hz), 25.76 (d,  $J = 20.4$  Hz).  $^{19}\text{F}$  NMR (565 MHz, Chloroform-*d*)  $\delta$  -220.97 (dp,  $J = 73.7, 25.6$  Hz). HRMS APCI:  $[\text{M}+\text{H}]^+$  calcd. for  $\text{C}_{11}\text{H}_{14}\text{FO}_2$ : 197.0973; Found 197.0972

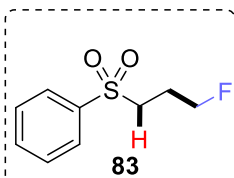

Prepared according to General Procedure C and obtained as colorless oil.  $^1\text{H}$  NMR (600 MHz, Chloroform-*d*)  $\delta$  7.95 – 7.89 (m, 2H), 7.71 – 7.65 (m, 1H), 7.61 – 7.57 (m, 2H), 4.52 (dt,  $J = 46.8, 5.7$  Hz, 2H), 3.27 – 3.21 (m, 2H), 2.20 – 2.09 (m, 2H).  $^{13}\text{C}$  NMR (151 MHz,  $\text{CDCl}_3$ )  $\delta$  138.91, 133.93, 129.43, 128.05, 81.55 (d,  $J = 167.9$  Hz), 52.53 (d,  $J = 4.3$  Hz), 24.09 (d,  $J = 20.8$  Hz).  $^{19}\text{F}$  NMR (565 MHz, Chloroform-*d*)  $\delta$  -220.52 (tt,  $J = 46.9, 25.9$  Hz). HRMS APCI:  $[\text{M}+\text{H}]^+$  calcd. for  $\text{C}_9\text{H}_{12}\text{FO}_2\text{S}$ : 203.0537; Found 203.0533

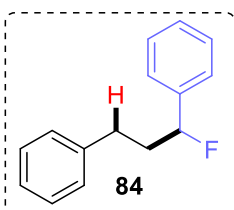

Prepared according to General Procedure C and obtained as colorless oil.  $^1\text{H}$  NMR (600 MHz, Chloroform-*d*)  $\delta$  7.39 – 7.35 (m, 2H), 7.34 – 7.31 (m, 3H), 7.31 – 7.27 (m, 2H), 7.22 – 7.18 (m, 3H), 5.43 (ddd,  $J = 47.8, 8.5, 4.4$  Hz, 1H), 2.87 – 2.68 (m, 2H), 2.38 – 2.24 (m, 1H), 2.18 – 2.05 (m, 1H).  $^{13}\text{C}$  NMR (151 MHz,  $\text{CDCl}_3$ )  $\delta$  141.13, 140.16 (d,  $J = 19.7$  Hz), 128.48, 128.46, 128.30 (d,  $J = 2.0$  Hz), 126.05, 125.57 (d,  $J = 6.8$  Hz), 93.65 (d,  $J = 170.9$  Hz), 38.82 (d,  $J = 23.9$  Hz), 31.32 (d,  $J = 4.3$  Hz).  $^{19}\text{F}$  NMR (565 MHz, Chloroform-*d*)  $\delta$  -176.01 (ddd,  $J = 46.5, 30.0, 15.9$  Hz). GC-MS:  $[\text{M}]^+$  calcd. for  $\text{C}_{15}\text{H}_{15}\text{F}$ : 214.1158; Found 214

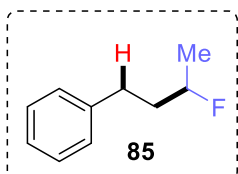

Prepared according to General Procedure C and obtained as colorless oil.  $^1\text{H}$  NMR (600 MHz, Chloroform-*d*)  $\delta$  7.31 – 7.27 (m, 2H), 7.20 (dd,  $J$  = 7.5, 1.4 Hz, 3H), 4.74 – 4.57 (m, 1H), 2.84-2.76 (m, 1H), 2.72-2.64 (m, 1H), 2.04-1.92 (m, 1H), 1.90 – 1.74 (m, 1H), 1.34 (dd,  $J$  = 23.9, 6.2 Hz, 3H).  $^{13}\text{C}$  NMR (151 MHz,  $\text{CDCl}_3$ )  $\delta$  141.50, 128.44, 125.95, 90.05 (d,  $J$  = 165.0 Hz), 38.67 (d,  $J$  = 20.8 Hz), 31.37 (d,  $J$  = 4.9 Hz), 21.00 (d,  $J$  = 22.6 Hz).  $^{19}\text{F}$  NMR (565 MHz, Chloroform-*d*)  $\delta$  -174.22 (ddqd,  $J$  = 47.9, 31.8, 23.7, 16.0 Hz). GC-MS:  $[\text{M}]^+$  calcd. for  $\text{C}_{10}\text{H}_{13}\text{F}$ : 152.1001; Found 152

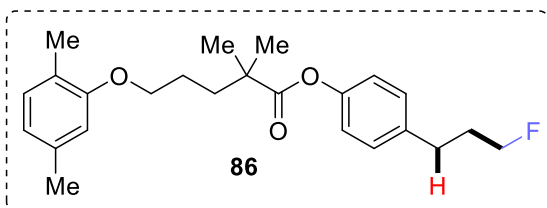

Prepared according to General Procedure C and obtained as colorless oil.  $^1\text{H}$  NMR (600 MHz, Chloroform-*d*)  $\delta$  7.21 – 7.15 (m, 2H), 7.02-6.98 (m, 1H), 6.98 – 6.92 (m, 2H), 6.69 – 6.64 (m, 1H), 6.64-6.60 (m, 1H), 4.45 (dt,  $J$  = 47.2, 5.9 Hz, 2H), 4.01-3.94 (m, 2H), 2.79 – 2.68 (m, 2H), 2.30 (s, 3H), 2.17 (s, 3H), 2.05 – 1.94 (m, 2H), 1.36 (s, 6H).  $^{13}\text{C}$  NMR (151 MHz,  $\text{CDCl}_3$ )  $\delta$  176.47, 156.88, 149.25, 138.45, 136.48, 130.34, 129.35, 123.62, 121.44, 120.74, 111.95, 82.97 (d,  $J$  = 165.0 Hz), 67.80, 42.40, 37.16, 32.04 (d,  $J$  = 19.8 Hz), 30.72 (d,  $J$  = 5.4 Hz), 25.28, 25.16, 21.40, 15.79.  $^{19}\text{F}$  NMR (565 MHz, Chloroform-*d*)  $\delta$  -220.24 (tt,  $J$  = 47.4, 25.6 Hz). HRMS APCI:  $[\text{M}+\text{H}]^+$  calcd. for  $\text{C}_{24}\text{H}_{32}\text{FO}_3$ : 387.2330; Found 387.2325

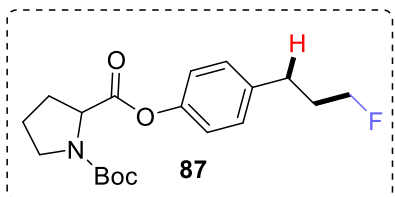

Prepared according to General Procedure C and obtained as colorless oil.  $^1\text{H}$  NMR (600 MHz, Chloroform-*d*)  $\delta$  7.23-7.16 (m, 2H), 7.06-7.00 (m, 2H), 4.55 – 4.39 (m, 3H), 3.65 – 3.41 (m, 2H), 2.78-2.69 (m, 2H), 2.44 – 2.28 (m, 1H), 2.22 – 2.12 (m, 1H), 2.08 – 1.91 (m, 4H), 1.47 (d,  $J$  = 7.4 Hz, 9H).  $^{13}\text{C}$  NMR (151 MHz,  $\text{CDCl}_3$ )  $\delta$  171.74, 154.45, 153.76, 149.04, 148.83, 138.78, 138.58, 129.48, 129.33, 121.39, 121.06, 82.98 (d,  $J$  = 164.8 Hz), 82.95 (d,  $J$  = 165.4 Hz), 80.20, 79.95, 59.18, 59.06, 46.62, 46.44, 32.02 (d,  $J$  = 19.9 Hz), 31.99 (d,  $J$  = 19.6 Hz), 31.06, 30.74, 30.71, 28.43, 24.48, 23.70.  $^{19}\text{F}$  NMR (565 MHz, Chloroform-*d*)  $\delta$  -219.84 – -220.64 (m). HRMS APCI:  $[\text{M}+\text{H}]^+$  calcd. for  $\text{C}_{19}\text{H}_{27}\text{FNO}_4$ : 352.1919; Found 352.1916

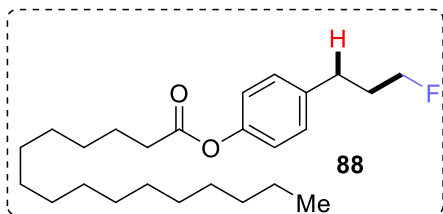

Prepared according to General Procedure C and obtained as colorless oil.  $^1\text{H}$  NMR (600 MHz, Chloroform-*d*)  $\delta$  7.21-7.16 (m, 2H), 7.02 – 6.97 (m, 2H), 4.45 (dt,  $J$  = 47.2, 5.9 Hz, 2H), 2.79 – 2.67 (m, 2H), 2.54 (t,  $J$  = 7.5 Hz, 2H), 2.06 – 1.93 (m, 2H), 1.74 (p,  $J$  = 7.5 Hz, 2H), 1.42 – 1.25 (m, 24H), 0.88 (t,  $J$  = 7.0 Hz, 3H).  $^{13}\text{C}$  NMR (151 MHz,  $\text{CDCl}_3$ )  $\delta$  172.49, 149.02, 138.50, 129.37, 121.51, 82.99 (d,  $J$  = 164.9 Hz), 34.42, 32.02 (d,  $J$  = 19.9 Hz), 31.94, 30.73 (d,  $J$  = 5.1 Hz), 29.71, 29.69, 29.67, 29.66, 29.61, 29.47, 29.37, 29.27, 29.12, 24.98, 22.70, 14.13.  $^{19}\text{F}$  NMR (565 MHz, Chloroform-*d*)  $\delta$  -220.23 (tt,  $J$  = 47.5, 25.5 Hz). HRMS APCI:  $[\text{M}+\text{H}]^+$  calcd. for  $\text{C}_{25}\text{H}_{42}\text{FO}_2$ : 393.3164; Found 393.3148

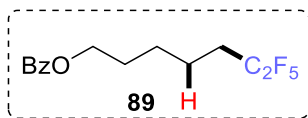

Prepared according to General Procedure D and obtained as colorless oil.  $^1\text{H}$  NMR (600 MHz, Chloroform-*d*)  $\delta$  8.07 – 8.00 (m, 2H), 7.59 – 7.54 (m, 1H), 7.44 (t,  $J$  = 7.8 Hz, 2H), 4.34 (t,  $J$  = 6.5 Hz, 2H), 2.10-1.99 (m, 2H), 1.86-1.78 (m, 2H), 1.73-1.64 (m, 2H), 1.57 – 1.52 (m, 2H).  $^{13}\text{C}$  NMR (151 MHz,  $\text{CDCl}_3$ )  $\delta$  166.64, 132.97, 130.33, 129.56, 128.40, 119.24 (qt,  $J$  = 285.2, 36.4 Hz), 115.76 (tq,  $J$  = 251.5, 37.5 Hz), 64.58, 30.62 (t,  $J$  = 22.2 Hz), 28.47, 25.75, 20.14 (t,  $J$  = 3.7 Hz).  $^{19}\text{F}$  NMR (565 MHz, Chloroform-*d*)  $\delta$  -85.45, -118.22 (t,  $J$  = 18.5 Hz). HRMS APCI:  $[\text{M}+\text{H}]^+$  calcd. for  $\text{C}_{14}\text{H}_{16}\text{F}_5\text{O}_2$ : 311.1065; Found 311.1060

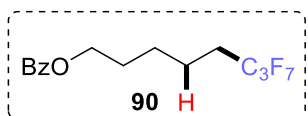

Prepared according to General Procedure D and obtained as colorless oil.  $^1\text{H}$  NMR (600 MHz, Chloroform-*d*)  $\delta$  8.08 – 8.00 (m, 2H), 7.59 – 7.54 (m, 1H), 7.44 (t,  $J$  = 7.8 Hz, 2H), 4.34 (t,  $J$  = 6.5 Hz, 2H), 2.15 – 2.03 (m, 2H), 1.87 – 1.77 (m, 2H), 1.73-1.66 (m, 2H), 1.59 – 1.51 (m, 2H).  $^{13}\text{C}$  NMR (151 MHz,  $\text{CDCl}_3$ )  $\delta$  166.65, 132.98, 130.34, 129.57, 128.41, 117.93 (qt,  $J$  = 287.5, 34.1 Hz), 117.71 (tt,  $J$  = 253.2, 30.9 Hz), 108.93 (tq,  $J$  = 263.4, 37.0 Hz), 64.59, 30.58 (t,  $J$  = 22.4 Hz), 28.49, 25.77, 19.97 (t,  $J$  = 3.8 Hz).  $^{19}\text{F}$  NMR (565 MHz, Chloroform-*d*)  $\delta$  -80.61 (t,  $J$  = 10.1 Hz), -115.36 (tdt,  $J$  = 20.0, 14.7, 10.0 Hz), -127.83 (d,  $J$  = 6.0 Hz). HRMS APCI:  $[\text{M}+\text{H}]^+$  calcd. for  $\text{C}_{15}\text{H}_{16}\text{F}_7\text{O}_2$ : 361.1003; Found 361.1029

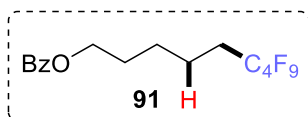

Prepared according to General Procedure D and obtained as colorless oil.  $^1\text{H}$  NMR (600 MHz, Chloroform-*d*)  $\delta$  8.08 – 7.99 (m, 2H), 7.61 – 7.52 (m, 1H), 7.44 (t,  $J$  = 7.6 Hz, 2H), 4.34 (t,  $J$  = 6.5 Hz, 2H), 2.16-2.03 (m, 2H), 1.87 – 1.77 (m, 2H), 1.77-1.65 (m, 2H), 1.60 – 1.49 (m, 2H).  $^{13}\text{C}$  NMR (151 MHz,  $\text{CDCl}_3$ )  $\delta$  166.61, 132.93, 130.31, 129.53, 128.37, 120.54-106.87 (m,  $\text{C}_4\text{F}_9$ ), 64.55, 30.72 (t,  $J$  = 22.4 Hz), 28.46, 25.73, 19.95 (t,  $J$  = 3.8 Hz).  $^{19}\text{F}$  NMR (565 MHz, Chloroform-*d*)  $\delta$  -81.09 (t,  $J$  = 11.2 Hz), -114.59 (dd,  $J$  = 37.7, 18.2 Hz), -124.50 (d,  $J$  = 11.6 Hz), -125.98 – -126.13 (m). HRMS APCI:  $[\text{M}+\text{H}]^+$  calcd. for  $\text{C}_{16}\text{H}_{16}\text{F}_9\text{O}_2$ : 411.1001; Found 411.0992

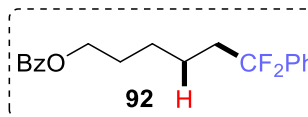

Prepared according to General Procedure D and obtained as colorless oil.  $^1\text{H}$  NMR (600 MHz, Chloroform-*d*)  $\delta$  8.08 – 7.99 (m, 2H), 7.59 – 7.52 (m, 1H), 7.49 – 7.36 (m, 7H), 4.29 (t,  $J$  = 6.6 Hz, 2H), 2.23 – 2.09 (m, 2H), 1.81 – 1.71 (m, 2H), 1.56-1.43 (m, 2.3 Hz, 4H).  $^{13}\text{C}$  NMR (151 MHz,  $\text{CDCl}_3$ )  $\delta$  166.61, 137.36 (t,  $J$  = 26.6 Hz), 132.86, 130.38, 129.61, 129.52, 128.38, 128.34, 124.89 (t,  $J$  = 6.2 Hz), 122.97 (t,  $J$  = 242.1 Hz), 64.76, 39.00 (t,  $J$  = 27.6 Hz), 28.52, 25.80, 22.28 (t,  $J$  = 4.0 Hz).  $^{19}\text{F}$  NMR (565 MHz, Chloroform-*d*)  $\delta$  -95.51 (t,  $J$  = 16.3 Hz). HRMS APCI:  $[\text{M}+\text{H}]^+$  calcd. for  $\text{C}_{19}\text{H}_{24}\text{F}_2\text{NO}_2$ : 336.1770; Found 336.1762

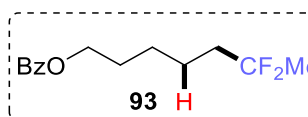

Prepared according to General Procedure D and obtained as colorless oil.  $^1\text{H}$  NMR (600 MHz, Chloroform-*d*)  $\delta$  8.04 (d,  $J$  = 7.7 Hz, 2H), 7.56 (t,  $J$  = 7.4 Hz, 1H), 7.44 (t,  $J$  = 7.6 Hz, 2H), 4.33 (t,  $J$  = 6.6 Hz, 2H), 1.92-1.75 (m, 4H), 1.60 – 1.46 (m, 7H).  $^{13}\text{C}$  NMR (151 MHz,  $\text{CDCl}_3$ )  $\delta$  166.66, 132.89, 130.41, 129.54, 128.36, 124.23 (t,  $J$  = 237.7 Hz), 64.78, 37.85 (t,  $J$  = 25.4 Hz), 28.57, 25.88, 23.28 (t,  $J$  = 28.1 Hz), 22.46 (t,  $J$  = 4.7 Hz).  $^{19}\text{F}$  NMR (564 MHz, Chloroform-*d*)  $\delta$  -90.59 (q,  $J$  = 17.5 Hz). HRMS APCI:  $[\text{M}+\text{H}]^+$  calcd. for  $\text{C}_{14}\text{H}_{19}\text{F}_2\text{O}_2$ : 257.1348; Found 257.1344

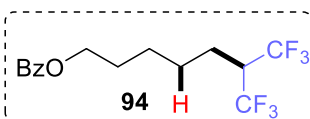

Prepared according to General Procedure D and obtained as colorless oil.  $^1\text{H}$  NMR (600 MHz, Chloroform-*d*)  $\delta$  8.07 – 7.98 (m, 2H), 7.59 – 7.53 (m, 1H), 7.45 (t,  $J$  = 7.8 Hz, 2H), 4.33 (t,  $J$  = 6.5 Hz, 2H), 2.90-2.79 (m, 1H), 1.90 – 1.70 (m, 4H), 1.64-1.57 (m, 2H), 1.54 – 1.47 (m, 2H).  $^{13}\text{C}$  NMR (151 MHz,  $\text{CDCl}_3$ )  $\delta$  166.64, 132.95, 130.32, 129.54, 128.38, 123.97 (q,  $J$  = 281.3 Hz), 123.95 (q,  $J$  = 281.6 Hz), 64.63, 47.99 (hept,  $J$  = 27.8 Hz), 28.35, 26.93, 25.95, 23.65 (hept,  $J$  = 1.9 Hz).  $^{19}\text{F}$  NMR (565 MHz, Chloroform-*d*)  $\delta$  -67.05 (d,  $J$  = 8.1 Hz). HRMS APCI:  $[\text{M}+\text{H}]^+$  calcd. for  $\text{C}_{15}\text{H}_{17}\text{F}_6\text{O}_2$ : 343.1127; Found 343.1121

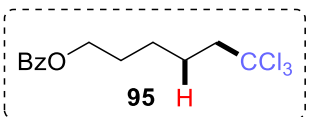

Prepared according to General Procedure D and obtained as colorless oil.  $^1\text{H}$  NMR (600 MHz, Chloroform-*d*)  $\delta$  8.08 – 8.02 (m, 2H), 7.59-7.54 (m, 1H), 7.49 – 7.41 (m, 2H), 4.36 (t,  $J$  = 6.5 Hz, 2H), 2.76 – 2.67 (m, 2H), 1.91 – 1.79 (m, 4H), 1.60-1.55 (m, 2H).  $^{13}\text{C}$  NMR (151 MHz,  $\text{CDCl}_3$ )  $\delta$  166.63, 132.94, 130.29, 129.55, 128.37, 99.88, 64.64, 55.00, 28.50, 26.17, 24.99. GC-MS:  $[\text{M}]^+$  calcd. for  $\text{C}_{13}\text{H}_{15}\text{Cl}_3\text{O}_2$ : 308.0138; Found 308

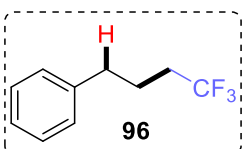

Prepared according to General Procedure D and obtained as colorless oil.  $^1\text{H}$  NMR (600 MHz, Chloroform-*d*)  $\delta$  7.32 – 7.28 (m, 2H), 7.23 – 7.19 (m, 1H), 7.19 – 7.14 (m, 2H), 2.69 (t,  $J$  = 7.6 Hz, 2H), 2.13 – 2.03 (m, 2H), 1.93 – 1.86 (m, 2H).  $^{13}\text{C}$  NMR (151 MHz,  $\text{CDCl}_3$ )  $\delta$  140.68, 128.56, 128.38, 127.19 (q,  $J$  = 276.5 Hz), 126.27, 34.64, 33.10 (q,  $J$  = 28.5 Hz), 23.50 (q,  $J$  = 2.9 Hz).  $^{19}\text{F}$  NMR (565 MHz, Chloroform-*d*)  $\delta$  -66.18 (t,  $J$  = 10.8 Hz). The compound characterization was reported in literature and the NMR data matched with previous characterization.<sup>17</sup>

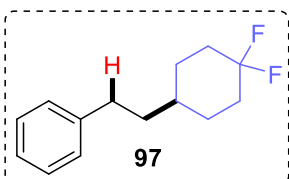

Prepared according to General Procedure D and obtained as colorless oil.  $^1\text{H}$  NMR (600 MHz, Chloroform-*d*)  $\delta$  7.30 – 7.26 (m, 2H), 7.21 – 7.15 (m, 3H), 2.68 – 2.59 (m, 2H), 2.13 – 2.02 (m, 2H), 1.88 – 1.78 (m, 2H), 1.77 – 1.62 (m, 2H), 1.61 – 1.57 (m, 2H), 1.39 – 1.29 (m, 3H).  $^{13}\text{C}$  NMR (151 MHz,  $\text{CDCl}_3$ )  $\delta$  142.38, 128.39, 128.29, 125.79, 123.80 (dd,  $J$  = 241.9, 239.5 Hz), 37.52 (d,  $J$  = 2.6 Hz), 35.23, 33.61, 33.45 (d,  $J$  = 2.9 Hz), 33.42, 33.30, 28.89 (d,  $J$  = 9.4 Hz).  $^{19}\text{F}$  NMR (565 MHz, Chloroform-*d*)  $\delta$  -81.46 – -111.74 (m). GC-MS:  $[\text{M}]^+$  calcd. for  $\text{C}_{14}\text{H}_{18}\text{F}_2$ : 224.1377; Found 224

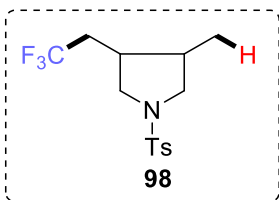

Prepared according to General Procedure A and obtained as colorless oil.  $^1\text{H}$  NMR (600 MHz, Chloroform-*d*)  $\delta$  7.76 – 7.67 (m, 2H), 7.34 (dd,  $J$  = 8.2, 2.3 Hz, 2H), 3.64-3.50 (m, 0.21H), 3.56-3.47 (m, 1.06H), 3.38-3.33 (m, 0.79H), 3.11 – 3.04 (m, 1.59H), 3.00-2.95 (m, 0.23H), 2.81-2.76 (m, 0.22H), 2.46-2.41 (m, 3H), 2.34 – 2.23 (m, 1.85H), 2.16 – 2.07 (m, 0.80H), 1.95 – 1.74 (m, 1.55H), 0.97 (d,  $J$  = 6.2 Hz, 0.65H), 0.77 (d,  $J$  = 6.7 Hz, 2.35H).  $^{13}\text{C}$  NMR (151 MHz,  $\text{CDCl}_3$ )  $\delta$  143.62, 143.59, 133.91, 133.67, 129.76, 129.74, 127.50, 127.40, 126.59 (q,  $J$  = 277.0 Hz), 126.35 (q,  $J$  = 276.9 Hz), 54.46, 53.96, 53.01, 50.41, 39.68 (q,  $J$  = 2.6 Hz), 38.69, 35.85 (q,  $J$  = 28.9 Hz), 35.73 (q,  $J$  = 2.6 Hz), 35.23, 32.41 (q,  $J$  = 28.8 Hz), 21.55, 21.54, 15.68, 13.25.  $^{19}\text{F}$  NMR (565 MHz, Chloroform-*d*)



$\delta$  -64.99 (t,  $J$  = 10.9 Hz), -65.03 (t,  $J$  = 10.9 Hz). HRMS APCI:  $[M+H]^+$  calcd. for  $C_{14}H_{19}F_3NO_2S$ : 322.1083; Found 322.1077

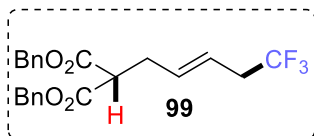

Prepared according to General Procedure A and obtained as colorless oil. <sup>1</sup>H NMR (600 MHz, Chloroform-*d*)  $\delta$  7.41 – 7.25 (m, 10H), 5.64 (dt,  $J$  = 14.6, 7.0 Hz, 1H), 5.44 (dt,  $J$  = 14.9, 7.0 Hz, 1H), 5.20 – 5.09 (m, 4H), 3.61-3.44 (m, 1H), 2.78 – 2.59 (m, 4H). <sup>13</sup>C NMR (151 MHz, CDCl<sub>3</sub>)  $\delta$  168.37, 135.27, 133.06, 128.58, 128.43, 128.28, 125.75 (q,  $J$  = 276.5 Hz), 121.37 (q,  $J$  = 3.6 Hz), 67.26, 51.55, 37.19 (q,  $J$  = 29.7 Hz), 31.61. <sup>19</sup>F NMR (565 MHz, Chloroform-*d*)  $\delta$  -66.51 (t,  $J$  = 10.9 Hz). The compound characterization was reported in literature and the NMR data matched with previous characterization.<sup>18</sup>

## 2.5 Relative configuration of compound **72**

On the basis of NMR experiment, we have assigned the major diastereomers of products **72** as shown below:

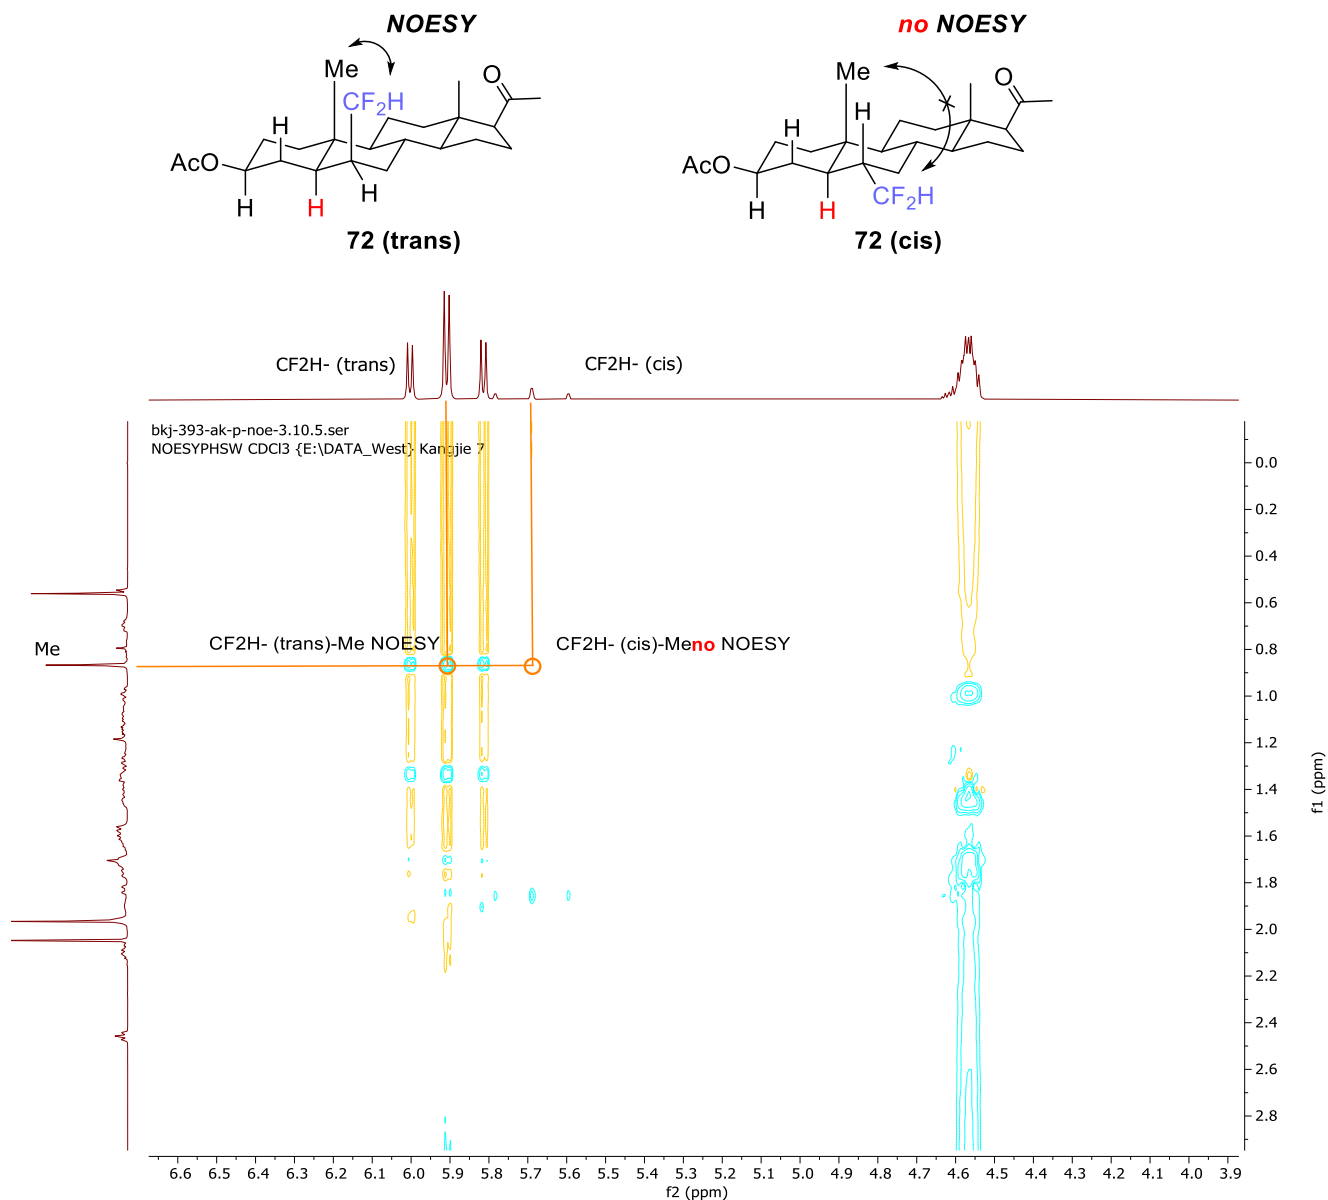

For **72-trans**, a strong NOE was observed for CF<sub>2</sub>H (trans)/Me. However, there is no significant NOE observed for CF<sub>2</sub>H (cis)/Me of **72-cis**. Therefore, major isomer of **72** should be the trans-product, which also correlates the finding by Wu and co-workers.<sup>19</sup>

## 2.6 Deuterium labelling and kinetic isotope effect (KIE) studies

### Deuterium labelling experiments

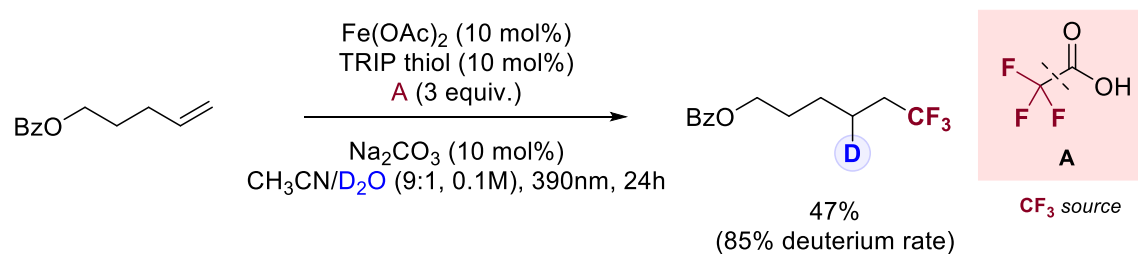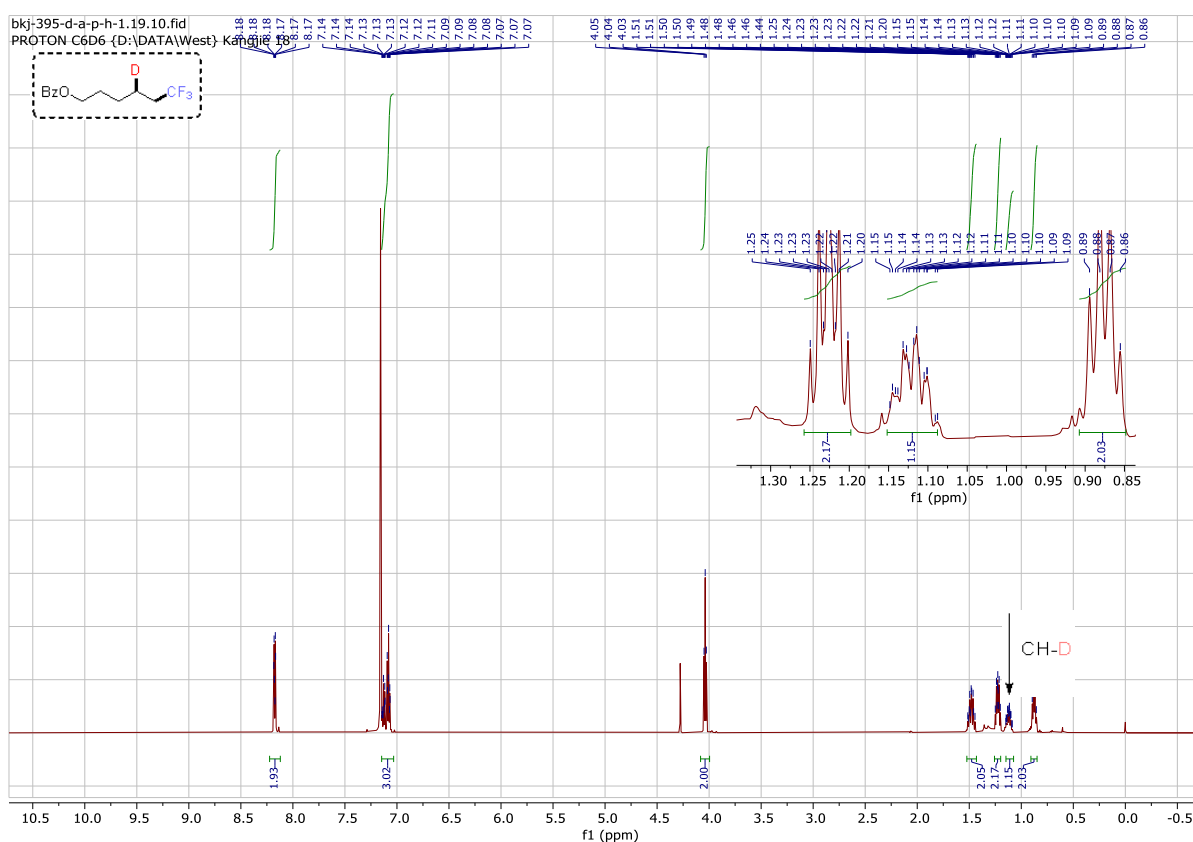

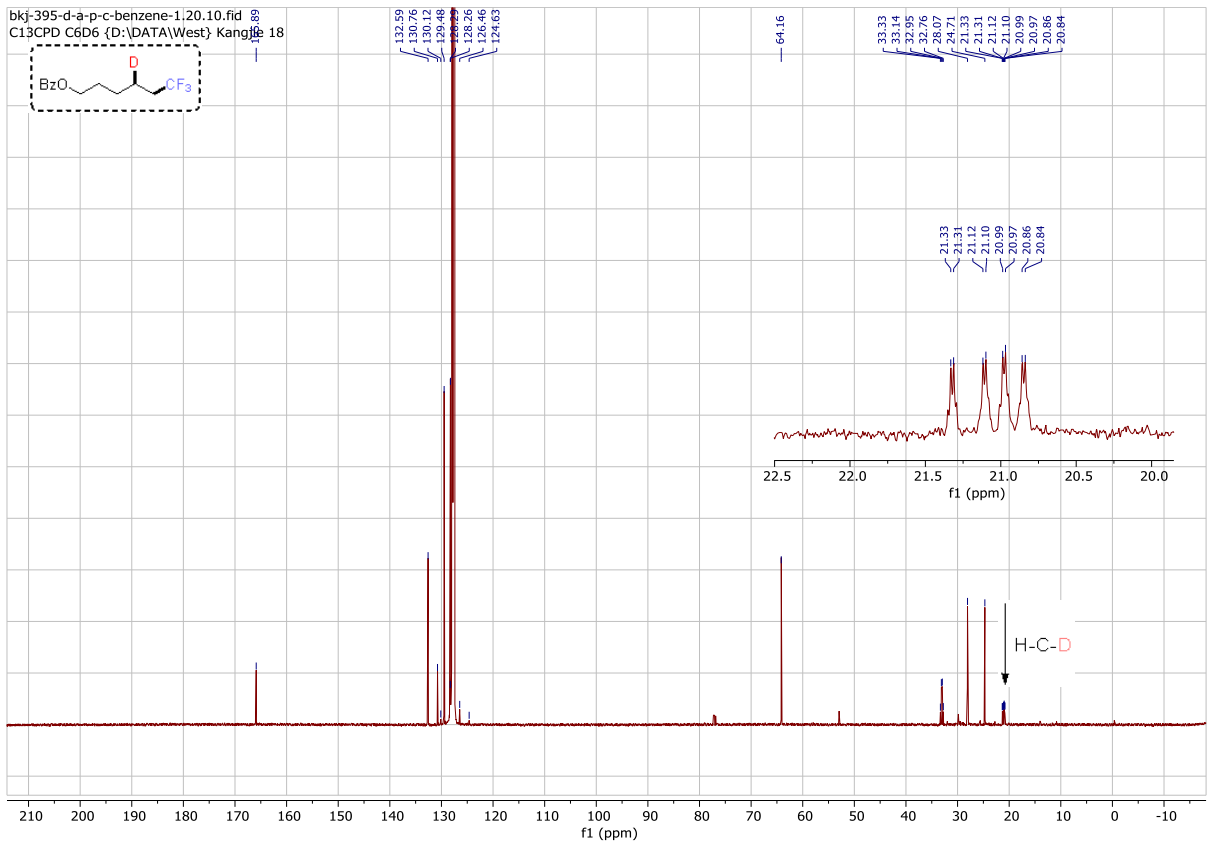

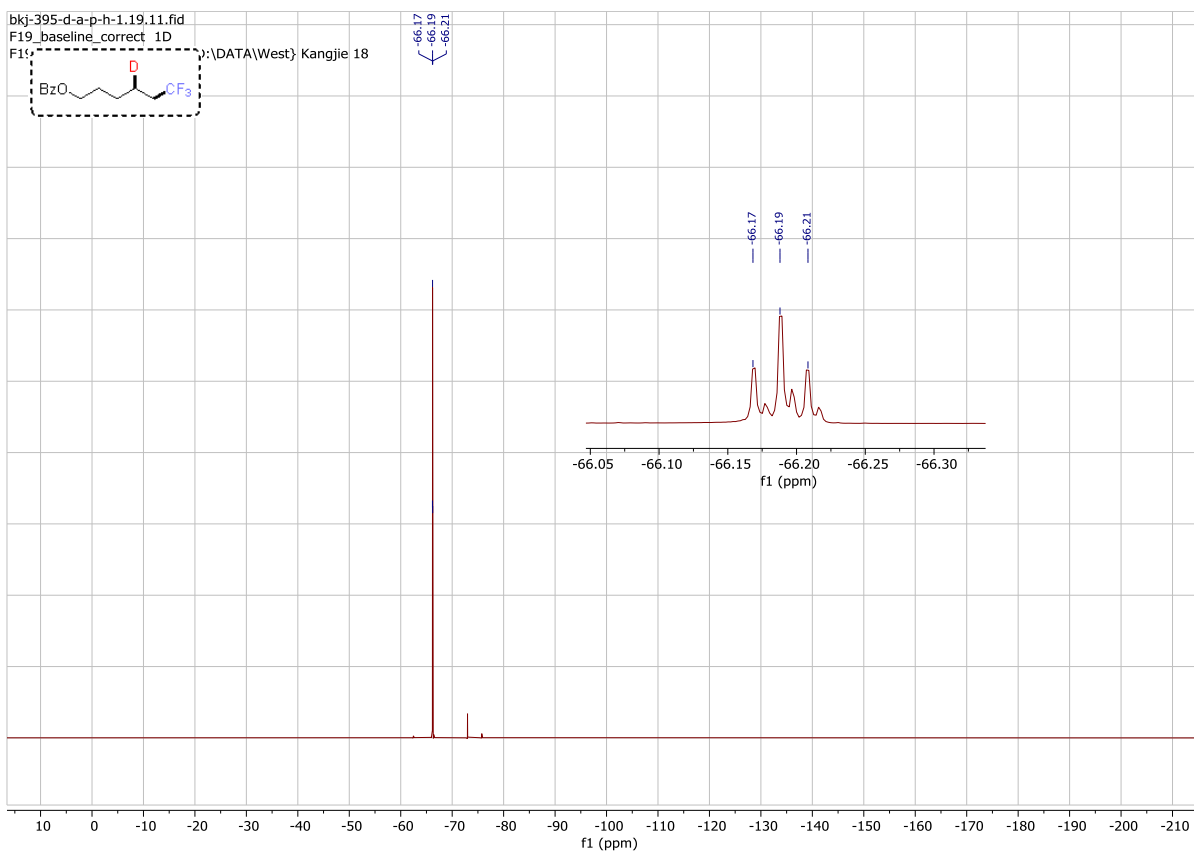

Chemical structure: BzOCCCC[C@H](D)CC(F)(F)F

$^1\text{H}$  NMR (600 MHz, Benzene- $d_6$ )  $\delta$  8.22 – 8.12 (m, 2H), 7.15 – 7.03 (m, 3H), 4.04 (t,  $J$  = 6.6 Hz, 2H), 1.52-1.43 (m, 2H), 1.26 – 1.20 (m, 2H), 1.15-1.08 (m, 1.10H), 0.91-0.85 (m, 2H).  $^{13}\text{C}$  NMR (151 MHz,  $\text{C}_6\text{D}_6$ )  $\delta$  165.89, 132.59, 130.76, 129.48, 128.26, 127.38 (q,  $J$  = 276.5 Hz), 64.16, 33.05 (q,  $J$  = 28.3 Hz), 28.07, 24.71, 21.33, 21.31, 21.12, 21.10, 20.99, 20.97, 20.86, 20.84.  $^{19}\text{F}$  NMR (565 MHz, Benzene- $d_6$ )  $\delta$  -66.19 (t,  $J$  = 11.3 Hz). HRMS APCI:  $[\text{M}+\text{H}]^+$  calcd. for  $\text{C}_{13}\text{H}_{15}\text{DF}_3\text{O}_2$ : 262.1160; Found 262.1156

## Kinetic isotope effect (KIE) experiments

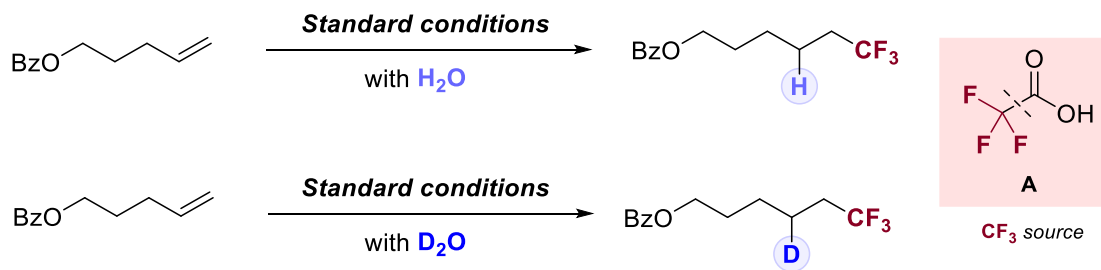

$\text{Fe}(\text{OAc})_2$  and  $\text{Na}_2\text{CO}_3$  were added in an oven-dried 8-mL test vial containing a Teflon®-coated magnetic stir bar. The vial was evacuated and backfilled with  $\text{N}_2$  (repeated for 4 times), followed by addition of alkenes,  $\text{CF}_3\text{COOH}$  and TRIP thiol in  $\text{MeCN}/\text{H}_2\text{O}$  (9:1, 0.1 M in regard to alkenes) via syringe under  $\text{N}_2$ . Note: Both reactions were run on 0.2 mmol of the substrate and  $\text{PhCF}_3$  was added as internal standard. The reaction mixture was placed under 390nm Kessil® light. At different time points, the aliquot of reaction mixture is directly transferred to NMR tube and reaction progress was monitored by  $^{19}\text{F}$  NMR.

| t (s) | $\text{H}_2\text{O}$ (M) | t (s) | $\text{D}_2\text{O}$ (M) |
|-------|--------------------------|-------|--------------------------|
| 0     | 0                        | 0     | 0                        |
| 1800  | 0.004                    | 1800  | 0.002                    |
| 3600  | 0.008                    | 3600  | 0.003                    |
| 5400  | 0.01                     | 5400  | 0.004                    |
| 7200  | 0.016                    | 7200  | 0.005                    |
| 9000  | 0.019                    | 9000  | 0.007                    |
| 10800 | 0.022                    | 10800 | 0.01                     |

| entry                | mmol acid | mmol alkene | mmol iron | mmol thiol | initial rate (M/s)    |
|----------------------|-----------|-------------|-----------|------------|-----------------------|
| H <sub>2</sub> O KIE | 0.3       | 0.1         | 0.01      | 0.01       | $2.06 \times 10^{-6}$ |
| D <sub>2</sub> O KIE | 0.3       | 0.1         | 0.01      | 0.01       | $0.83 \times 10^{-6}$ |

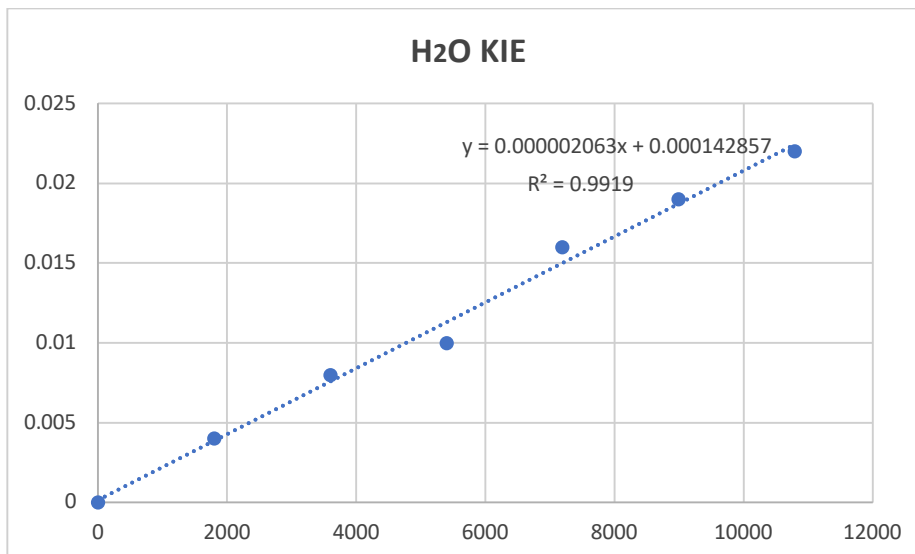

Reaction with H<sub>2</sub>O (standard conditions):  $y = (2.06 \times 10^{-6})(k_H)x + (1.4 \times 10^{-4})$ ,  $R^2 = 0.9916$

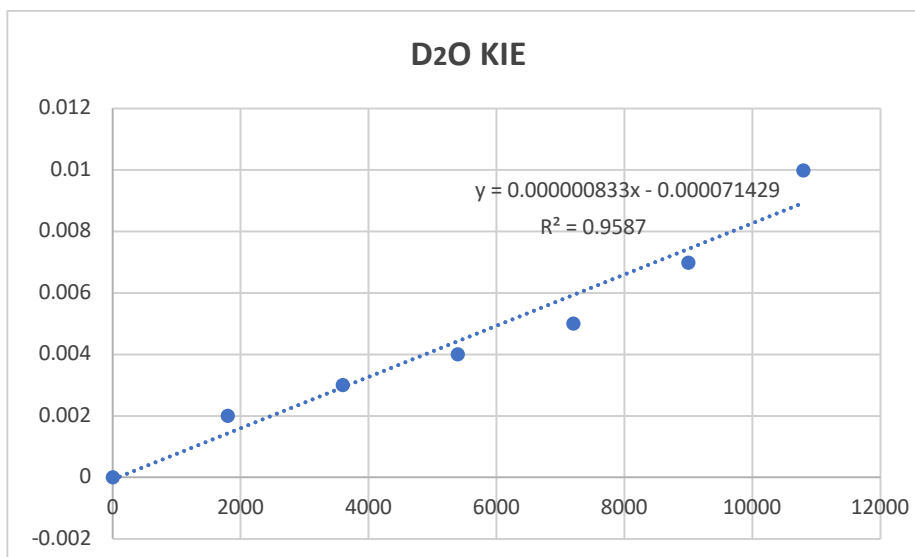

Reaction with D<sub>2</sub>O:  $y = (0.83 \times 10^{-6})(k_D)x - (7.1 \times 10^{-4})$ ,  $R^2 = 0.9587$

KIE:  $k_H/k_D = 2.5$

## 2.7 Kinetic studies to determine reaction rate law

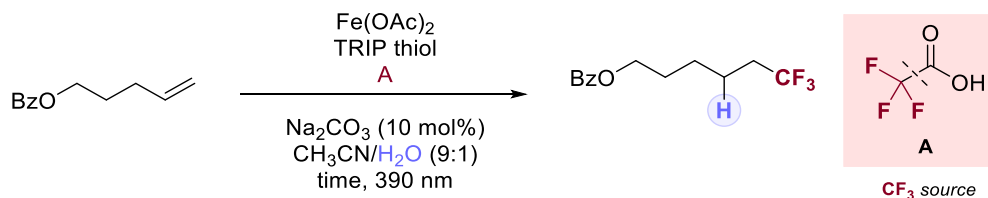

$\text{Fe}(\text{OAc})_2$  and  $\text{Na}_2\text{CO}_3$  were added in an oven-dried 8-mL test vial containing a Teflon®-coated magnetic stir bar. The vial was evacuated and backfilled with  $\text{N}_2$  (repeated for 4 times), followed by addition of alkenes,  $\text{CF}_3\text{COOH}$  and TRIP thiol in  $\text{MeCN}/\text{H}_2\text{O}$  (9:1, 0.1 M in regard to alkenes) via syringe under  $\text{N}_2$ . Note: All reactions were run on 0.2 mmol of the substrate and  $\text{PhCF}_3$  was added as internal standard. The reaction mixture was placed under 390nm Kessil® light. At different time points, the aliquot of reaction mixture is directly transferred to NMR tube and reaction progress was monitored by  $^{19}\text{F}$  NMR.

| entry | mmol acid | mmol alkene | mmol iron | mmol thiol | initial rate (M/s)    |
|-------|-----------|-------------|-----------|------------|-----------------------|
| 1     | 0.3       | 0.1         | 0.01      | 0.01       | $2.06 \times 10^{-6}$ |
| 2     | 0.3       | 0.05        | 0.01      | 0.01       | $2.14 \times 10^{-6}$ |
| 3     | 0.3       | 0.15        | 0.01      | 0.01       | $2.02 \times 10^{-6}$ |
| 4     | 0.2       | 0.1         | 0.01      | 0.01       | $1.98 \times 10^{-6}$ |
| 5     | 0.4       | 0.1         | 0.01      | 0.01       | $2 \times 10^{-6}$    |
| 6     | 0.3       | 0.1         | 0.005     | 0.01       | $5.6 \times 10^{-7}$  |
| 7     | 0.3       | 0.1         | 0.015     | 0.01       | $3.63 \times 10^{-6}$ |
| 8     | 0.3       | 0.1         | 0.01      | 0.0025     | $1.05 \times 10^{-6}$ |
| 9     | 0.3       | 0.1         | 0.01      | 0.0035     | $1.63 \times 10^{-6}$ |
| 10    | 0.3       | 0.1         | 0.01      | 0.005      | $2.28 \times 10^{-6}$ |
| 11    | 0.3       | 0.1         | 0.01      | 0.0075     | $2.5 \times 10^{-6}$  |

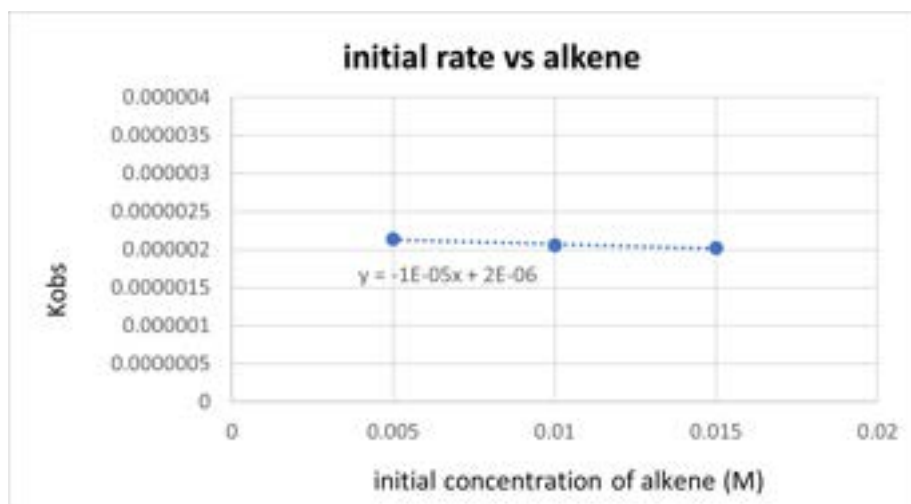



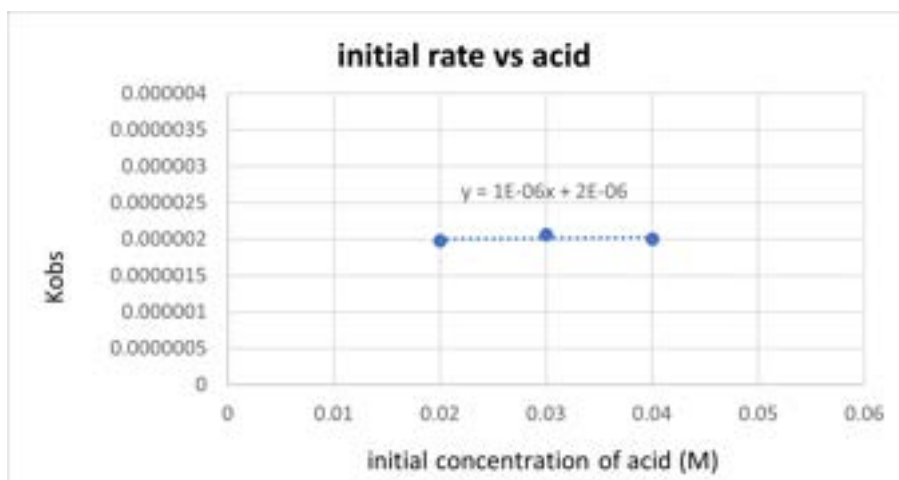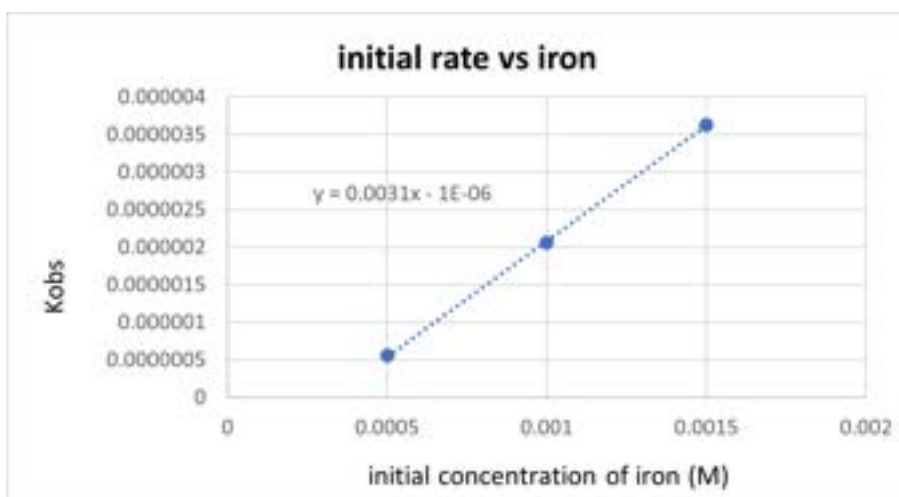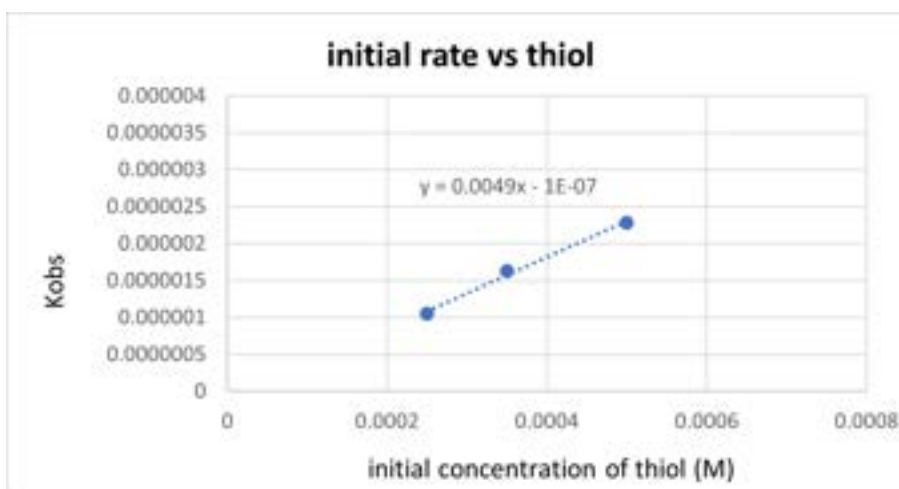

With higher loading of thiol catalyst (15 mol%), negative order of thiol is observed. The oversaturation of thiol catalyst may lead to other side reactions, consuming thiol and circumventing the following dual catalytic cycle with iron and other reactants.

| entry | mmol acid | mmol alkene | mmol iron | mmol thiol | initial rate (M/s)   |
|-------|-----------|-------------|-----------|------------|----------------------|
| 12    | 0.3       | 0.1         | 0.01      | 0.015      | $6.8 \times 10^{-7}$ |

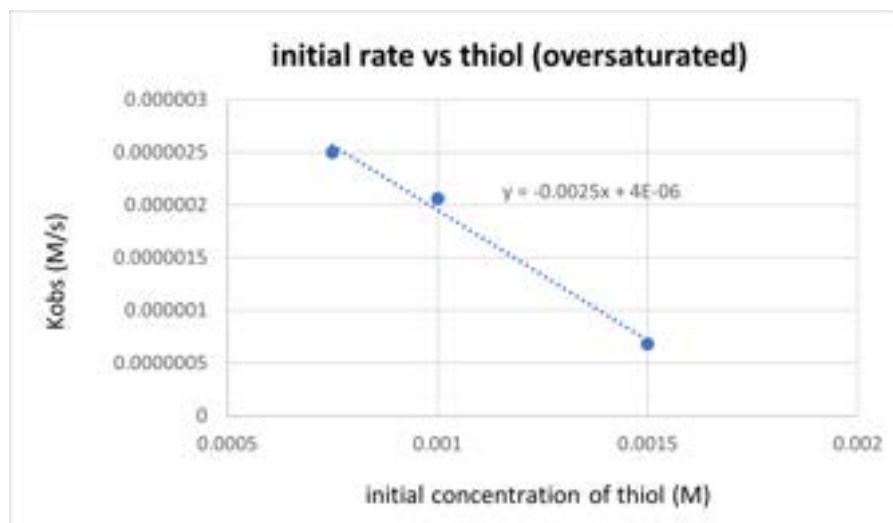

Indicated by previous reports<sup>20-23</sup> and our study on disulfide formation (see 2.7 Study of disulfide formation), thiol catalyst can form disulfide under light irradiation. Furthermore, TEMPO-trapping experiment demonstrates that higher concentration of disulfide could quench  $CF_3$  radical, indicated by peak at -42.74ppm on  $^{19}F$  NMR, suggesting the generation of TRIP- $SCF_3$ .<sup>24</sup>

With higher concentration of TRIP thiol in the system, it is more likely to form disulfide under light irradiation, which can sequester the  $CF_3$  radical, leading to drastically decreased rate of thiol and showing negative order when reaching oversaturation.

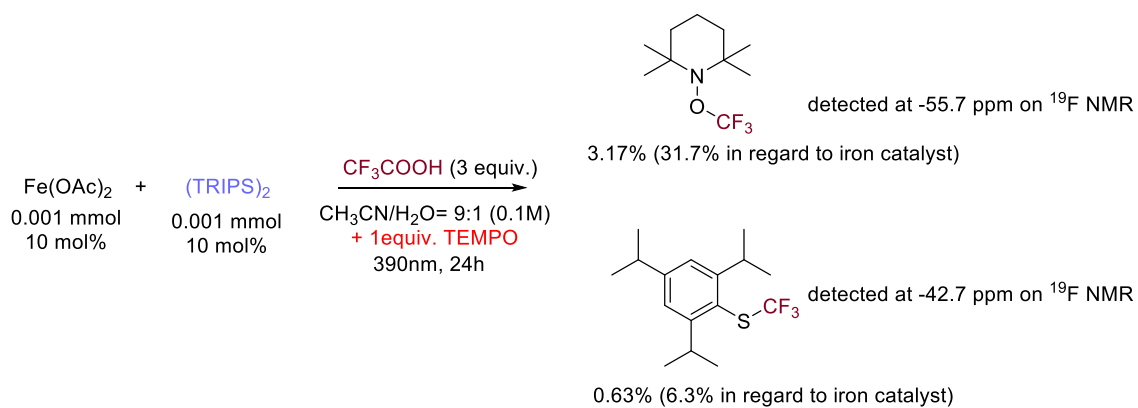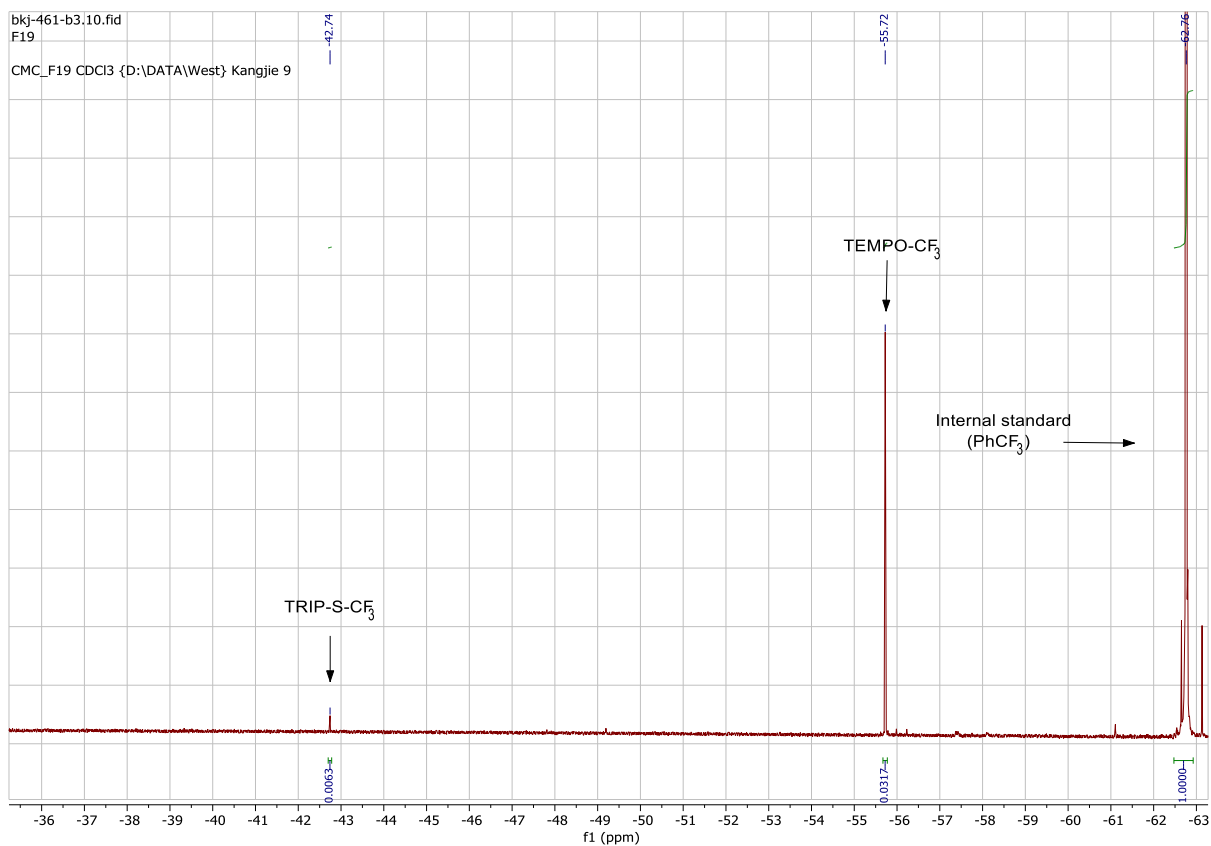

## 2.8 Light intensity impact on reaction rate

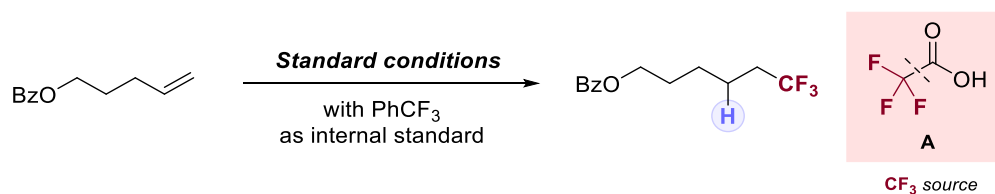

Following General Procedure A, all reactions were run on 0.2 mmol of the substrate and PhCF<sub>3</sub> was added as internal standard. The reaction mixture was placed under 390nm Kessil® light. At different time points, the aliquot of reaction mixture is directly transferred to NMR tube and reaction progress was monitored by <sup>19</sup>F NMR. Reaction rate is correlated to light intensity positively, indicating a light-dependent character of the system.

| entry    | mmol acid | mmol alkene | mmol iron | mmol thiol | initial rate (M/s)      |
|----------|-----------|-------------|-----------|------------|-------------------------|
| 25%, 3cm | 0.3       | 0.1         | 0.01      | 0.01       | 2.06 x 10 <sup>-6</sup> |
| 75%, 3cm | 0.3       | 0.1         | 0.01      | 0.01       | 5.68 x 10 <sup>-6</sup> |
| 25%, 6cm | 0.3       | 0.1         | 0.01      | 0.01       | 7.14 x 10 <sup>-7</sup> |

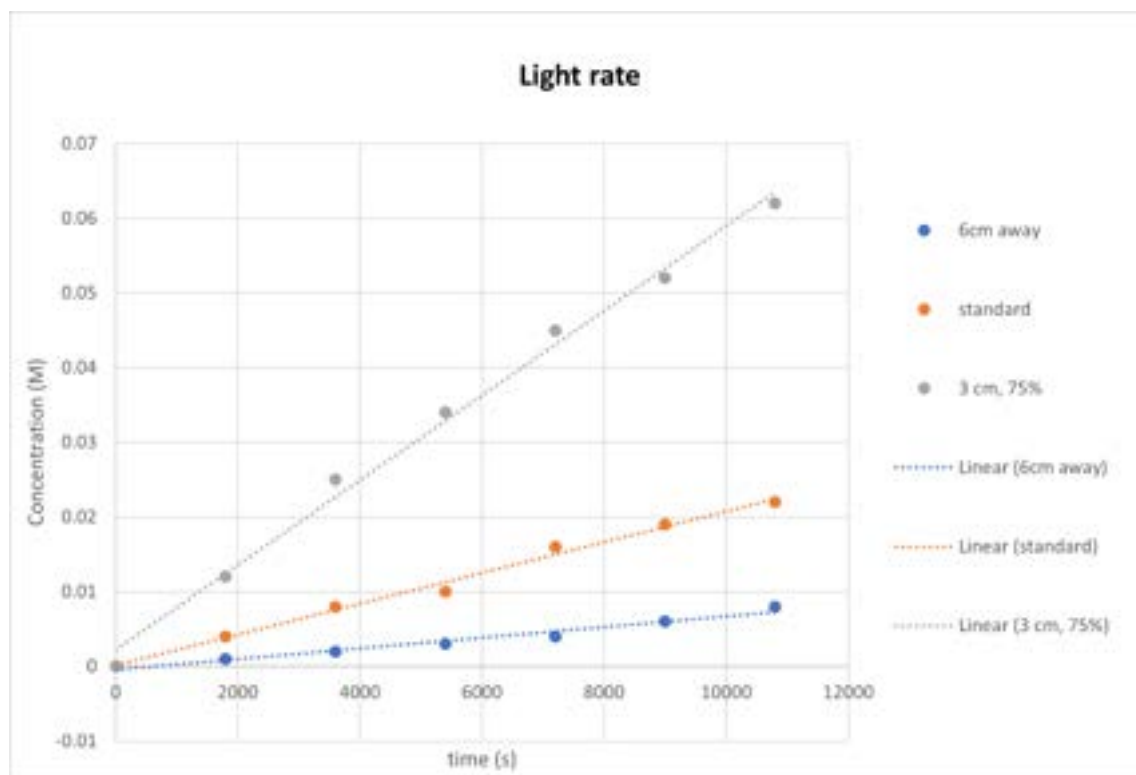

## 2.9 Study of the disulfide formation

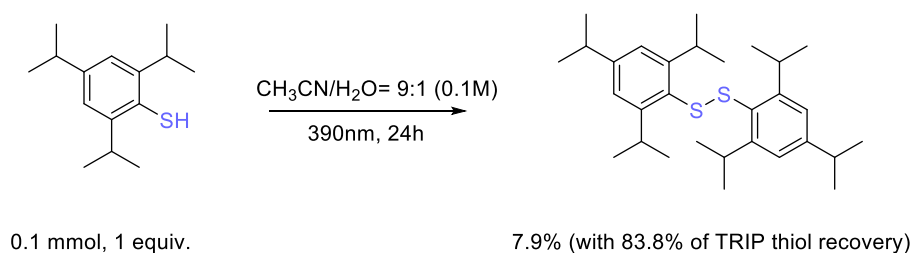

TRIP thiol (0.1 mmol, 1 equiv. was added to MeCN/H<sub>2</sub>O (9:1, 0.1 M) via syringe after backfilling with N<sub>2</sub>) was added in an oven-dried 8-mL test vial containing a Teflon®-coated magnetic stir bar. The reaction mixture was placed under 390nm Kessil® light after sealing the punctured holes of the vial cap with vacuum grease and electric tape/parafilm for better air-tight protection and allowed to react at room temperature for 24 h. With solid formation observed over time, crude NMR indicated the formation of TRIP disulfide in 7.9% yield with 83.8% TRIP thiol recovery. The formation of disulfide could further engage in homolysis under light irradiation, leading to generation of thiyl radical, which can oxidize Fe(II) catalyst to photoreactive Fe(III) species, initiating the fluoroalkyl radical generation.<sup>20-23</sup>

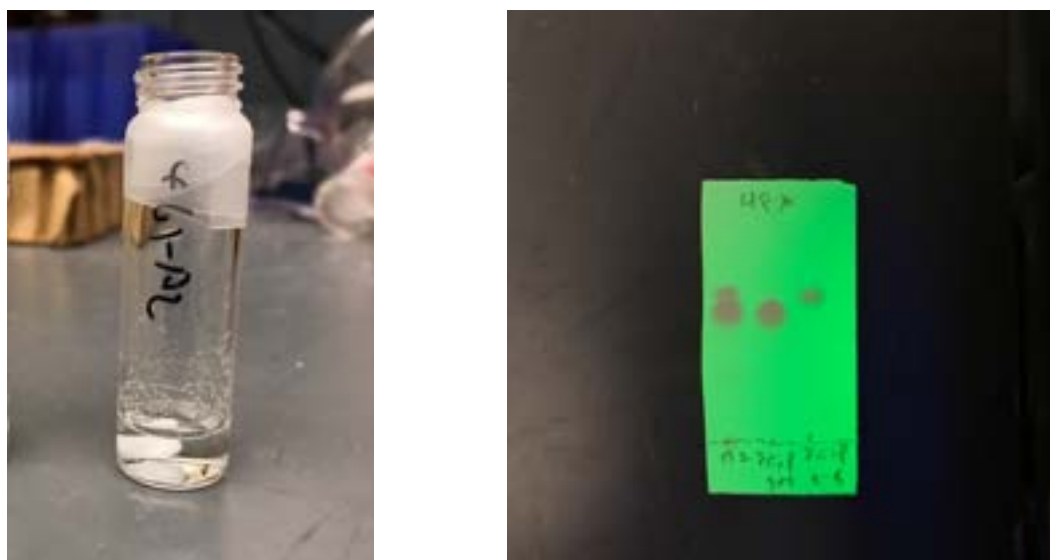

**Figure S1.** Left: solid formation (TRIP disulfide). Right: TLC spotting (left to right: reaction mixture, pure TRIP thiol, pure TRIP disulfide).

bkj-461-a2.10.fid  
PROTON CDCl3 (D:\DATA\West\ Kangjie 4

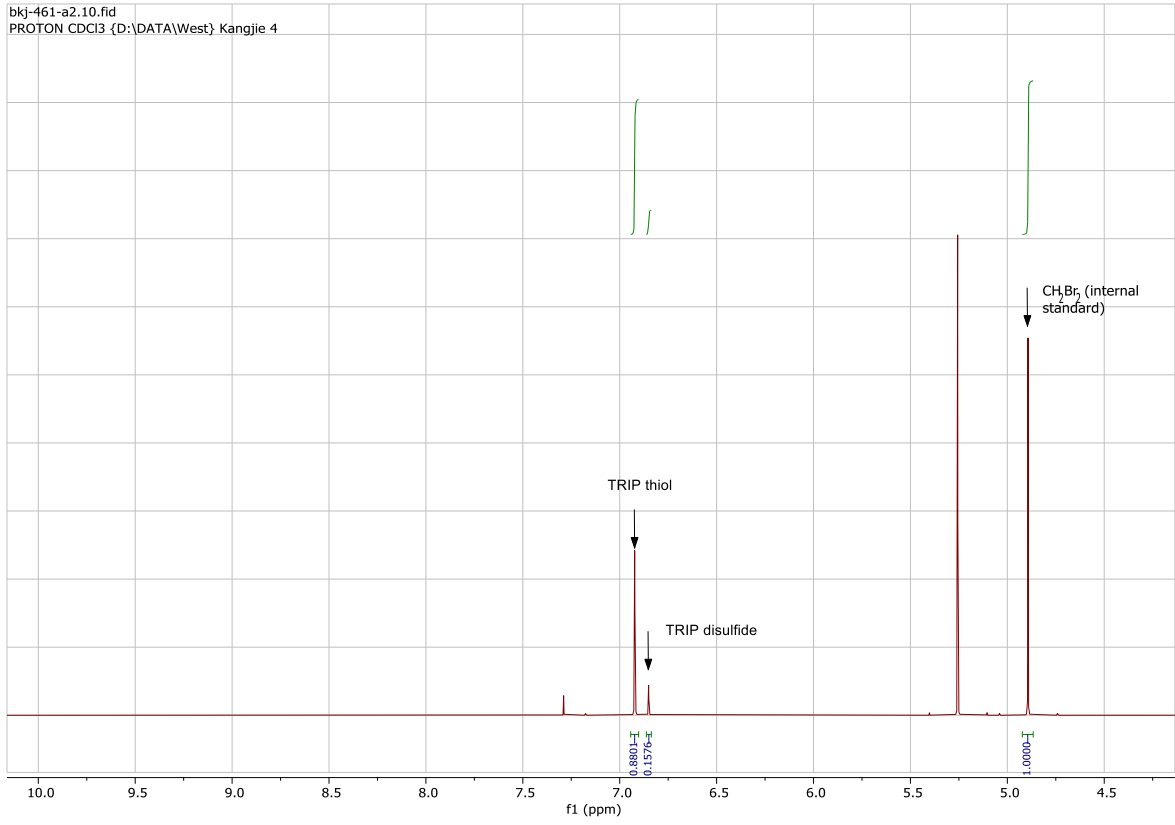

## 2.10 TEMPO experiment study

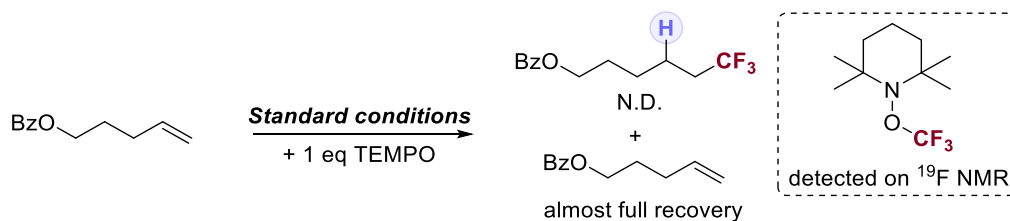

Fe(OAc)<sub>2</sub> (10 mol%, 0.1 equiv.), Na<sub>2</sub>CO<sub>3</sub> (10 mol%, 0.1 equiv.) and TEMPO (1 equiv.) were added via syringe after backfilling with N<sub>2</sub>) was added in an oven-dried 8-mL test vial containing a Teflon®-coated magnetic stir bar. The vial was evacuated and backfilled with N<sub>2</sub> (repeated for 4 times), followed by addition of alkenes (0.1 mmol, 1.0 equiv.) TRIP thiol (10 mol%, 0.1 equiv.) and CF<sub>3</sub>COOH (0.30 mmol, 3.0 equiv) in MeCN/H<sub>2</sub>O (9:1, 0.1 M in regard to alkenes) via syringe under N<sub>2</sub>. The reaction mixture was placed under 390nm Kessil® light after sealing the punctured holes of the vial cap with vacuum grease and electric tape/parafilm for better air-tight protection and allowed to react at room temperature for 24 h. Following this, the reaction mixture was filtered through a pad of celite which was subsequently rinsed with DCM. The filtrate was concentrated and directly applied for crude <sup>19</sup>F NMR (with PhCF<sub>3</sub> as internal standard). The detection of TEMPO-CF<sub>3</sub> at -55.70 ppm suggested CF<sub>3</sub> radical generation in the system.<sup>25</sup>

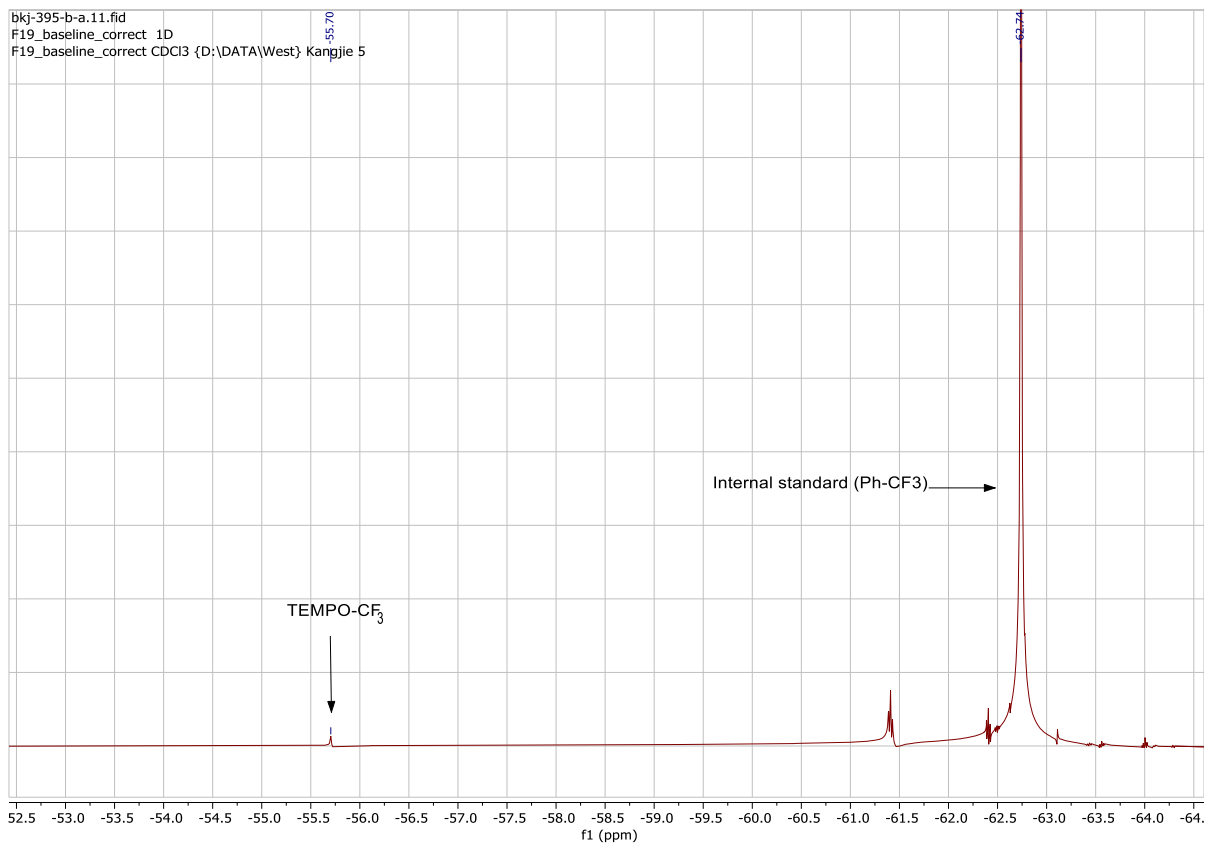



## 2.11 Evidence of visible-light induced homolysis of trifluoroacetic acid with iron

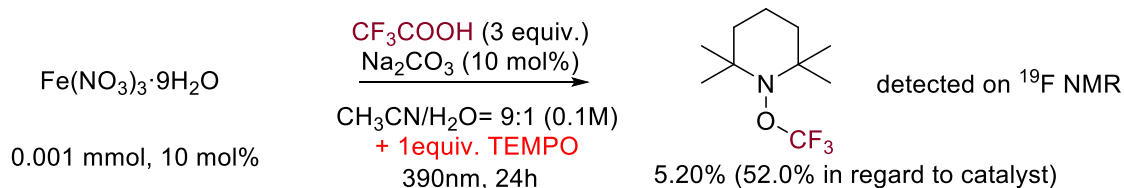

$\text{Fe}(\text{NO}_3)_3 \cdot 9\text{H}_2\text{O}$  (10 mol%, 0.1 equiv.),  $\text{Na}_2\text{CO}_3$  (10 mol%, 0.1 equiv.) and TEMPO (1 equiv.) were added via syringe after backfilling with  $\text{N}_2$ ) was added in an oven-dried 8-mL test vial containing a Teflon®-coated magnetic stir bar. The vial was evacuated and backfilled with  $\text{N}_2$  (repeated for 4 times), followed by  $\text{CF}_3\text{COOH}$  (0.30 mmol, 3.0 equiv.) in MeCN/ $\text{H}_2\text{O}$  (9:1, 0.1M) via syringe under  $\text{N}_2$ . The reaction mixture was placed under 390nm Kessil® light after sealing the punctured holes of the vial cap with vacuum grease and electric tape/parafilm for better air-tight protection and allowed to react at room temperature for 24 h. Following this, the reaction mixture was filtered through a pad of celite which was subsequently rinsed with DCM. The filtrate was concentrated and directly applied for crude  $^{19}\text{F}$  NMR (with  $\text{PhCF}_3$  as internal standard).

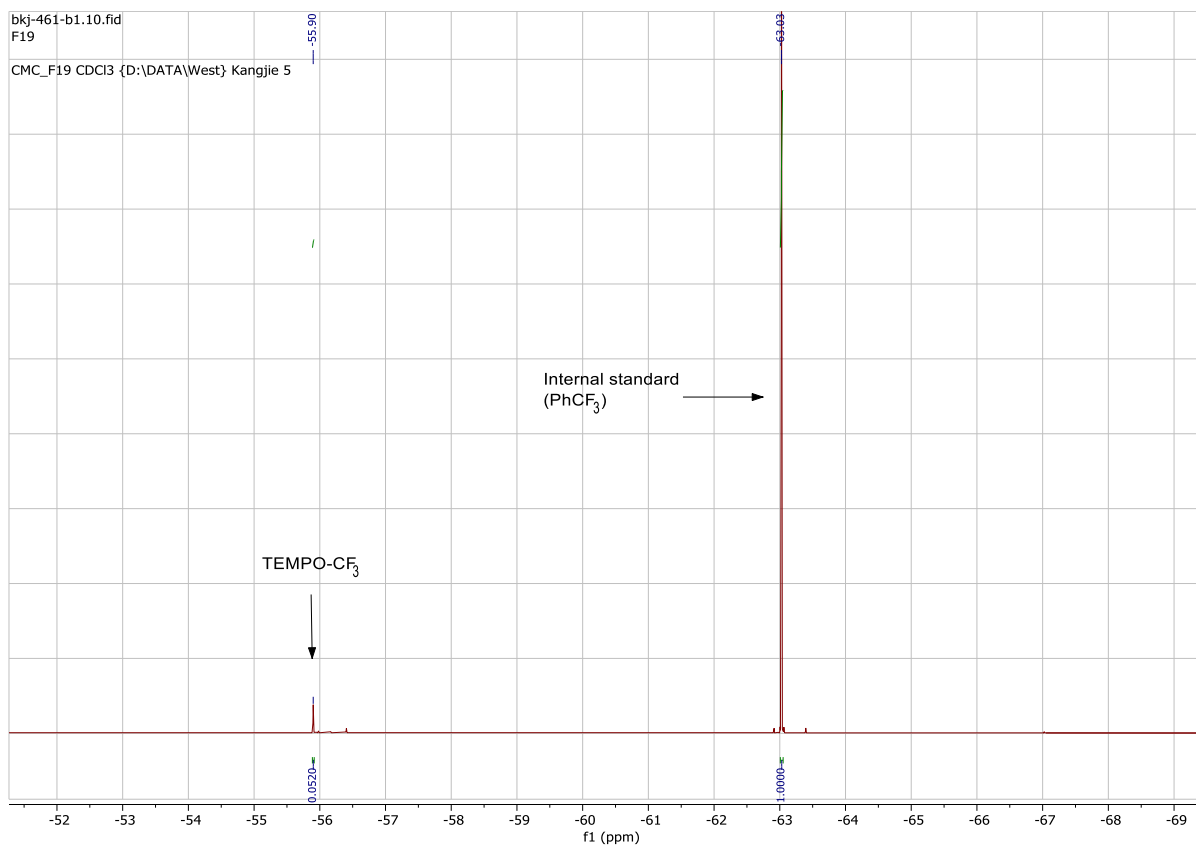

Indicated by <sup>19</sup>F NMR, photoactive Fe(III) (Fe(NO<sub>3</sub>)<sub>3</sub>·9H<sub>2</sub>O) could induce the homolysis of trifluoroacetic acid (TFA) under light irradiation, as TEMPO-CF<sub>3</sub> was detected at -55.9 ppm in 5.2% yield (52.0% in regard to iron).

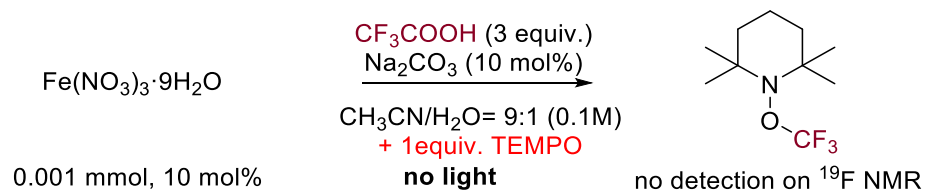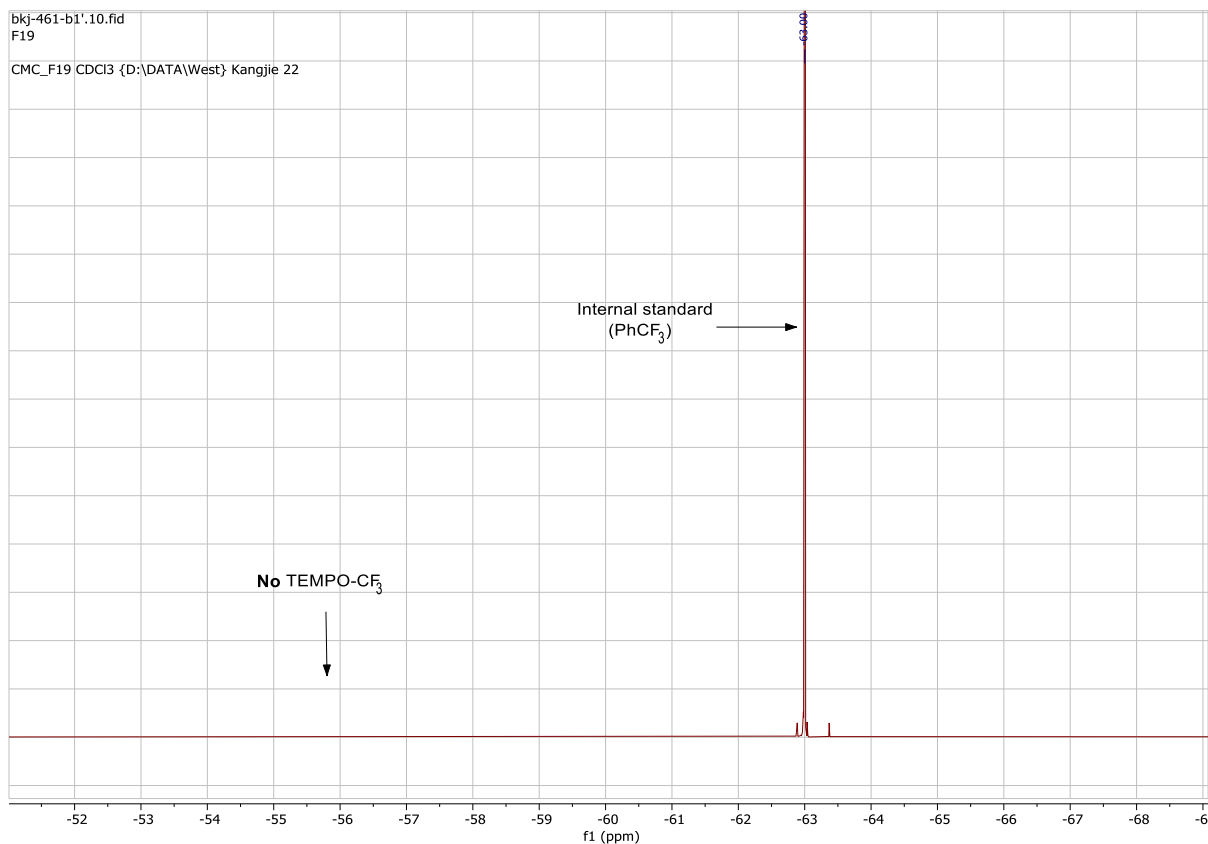

Indicated by  $^{19}\text{F}$  NMR, in the absence of light irradiation, the homolysis of trifluoroacetic acid (TFA) by Fe(III) ( $\text{Fe}(\text{NO}_3)_3 \cdot 9\text{H}_2\text{O}$ ) is not observed, supporting light is necessary in promoting homolysis of TFA to afford  $\text{CF}_3$  radical.

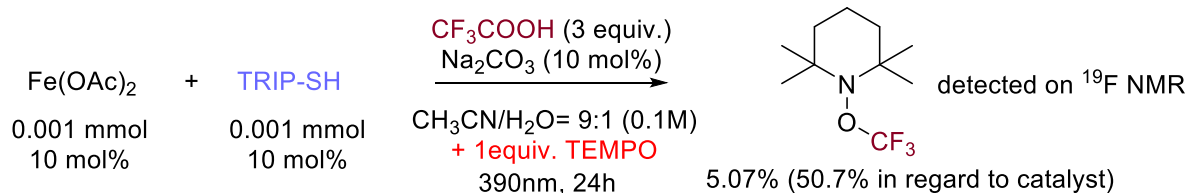

$\text{Fe}(\text{OAc})_2$  (10 mol%, 0.1 equiv.),  $\text{Na}_2\text{CO}_3$  (10 mol%, 0.1 equiv.) and TEMPO (1 equiv.) were added via syringe after backfilling with  $\text{N}_2$  was added in an oven-dried 8-mL test vial containing a Teflon®-coated magnetic stir bar. The vial was evacuated and backfilled with  $\text{N}_2$  (repeated for 4 times), followed by TRIPSH (10 mol%, 0.1 equiv.),  $\text{CF}_3\text{COOH}$  (0.30 mmol, 3.0 equiv.) in  $\text{MeCN}/\text{H}_2\text{O}$  (9:1, 0.1M) via syringe under  $\text{N}_2$ . The reaction mixture was placed under 390nm Kessil® light after sealing the punctured holes of the vial cap with vacuum grease and electric tape/parafilm for better air-tight protection and allowed to react at room temperature for 24 h. Following this, the reaction mixture was filtered through a pad of celite which was subsequently rinsed with DCM. The filtrate was concentrated and directly applied for crude  $^{19}\text{F}$  NMR (with  $\text{PhCF}_3$  as internal standard).

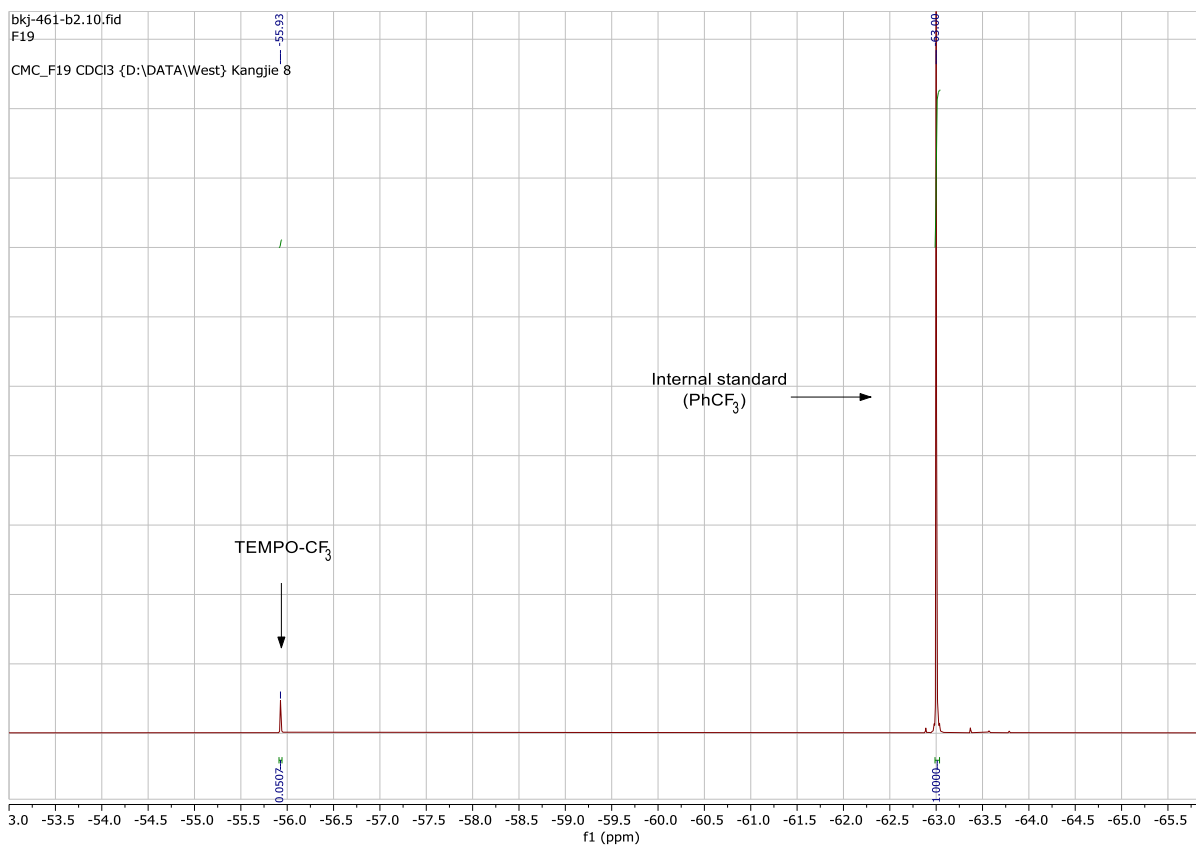

As demonstrated in the section of 2.7 Study of disulfide formation and illustrated by previous reports,<sup>20-23</sup> thiol or disulfide can undergo homolysis under light irradiation, which is capable of oxidizing lower-valent iron species to photoactive iron (III) species, engaging in the following photoinduced homolysis of trifluoroacetic acid.

Indicated by <sup>19</sup>F NMR, the mixture of Fe(OAc)<sub>2</sub> and TRIP thiol could induce the homolysis of trifluoroacetic acid (TFA) under light irradiation, as TEMPO-CF<sub>3</sub> was detected at -55.9 ppm in 5.07% yield (50.7% in regard to iron).

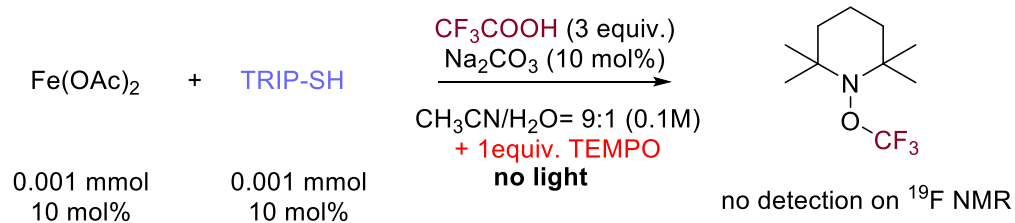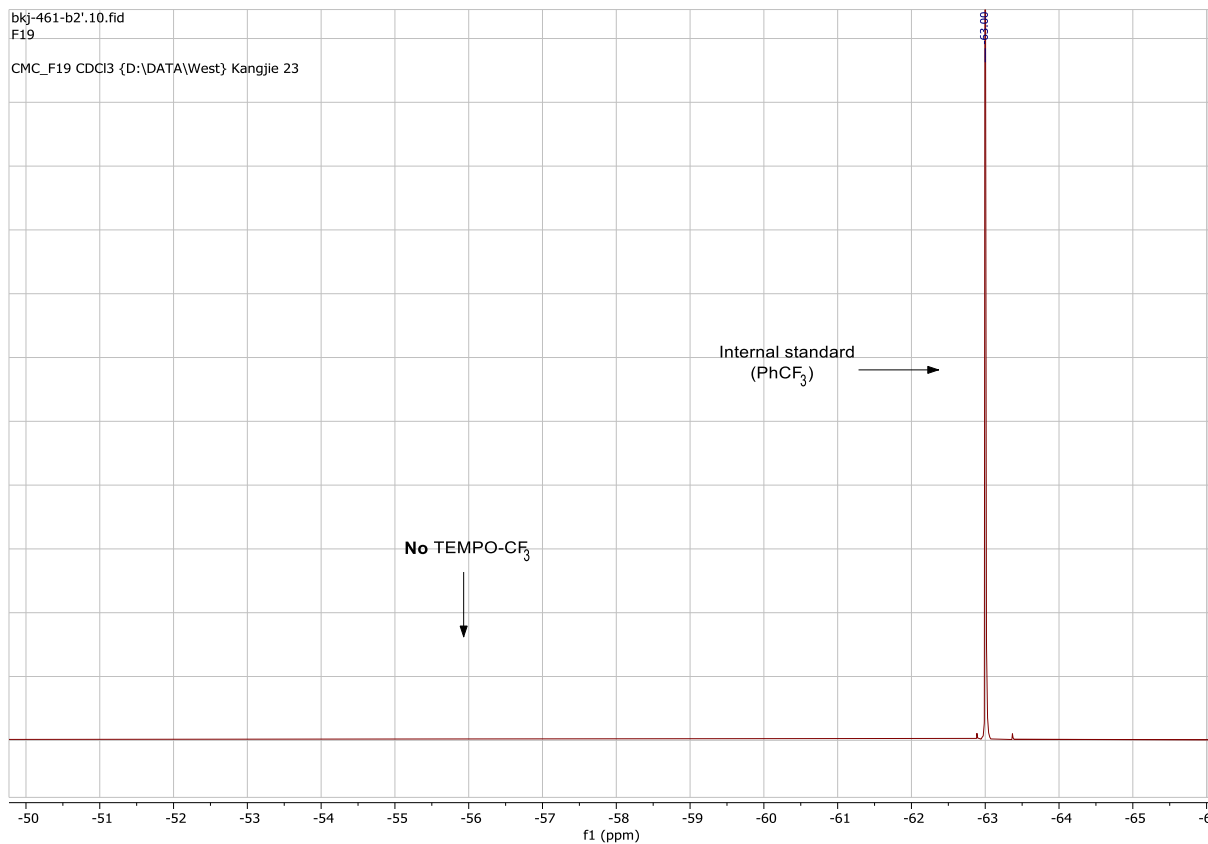

Similar to Fe(III) counterpart and indicated by  $^{19}\text{F}$  NMR, the homolysis of trifluoroacetic acid is not observed by the combination of Fe(II) ( $\text{Fe}(\text{OAc})_2$ ) and TRIP thiol in the absence of light irradiation, confirming light is necessary in inducing homolysis of trifluoroacetic acid to afford  $\text{CF}_3$  radical.

## 2.12 Mass balance studies of hydrofluoroalkylation of representative examples

### Mass balance studies of heterocycle-containing substrates

#### Trifluoromethylation Examples

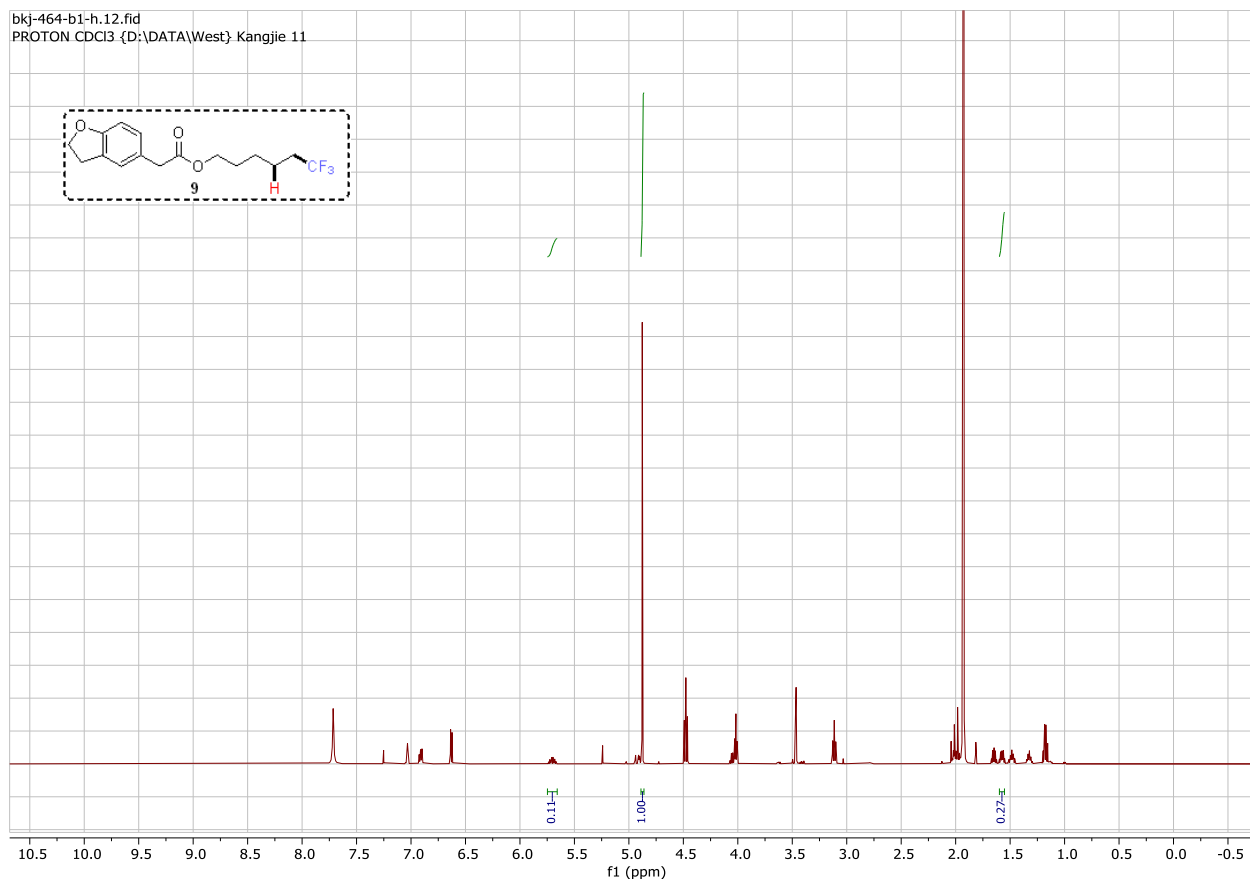

As indicated in the crude <sup>1</sup>H NMR, **9** is produced in 54% NMR yield at 1.60-1.55 (m, 2H) with 44% residual starting material rat (5.75-5.66, m, 1H) (in regard to 0.1 mmol CH<sub>2</sub>Br<sub>2</sub> as internal standard). The mass-balance of this reaction is 98%.

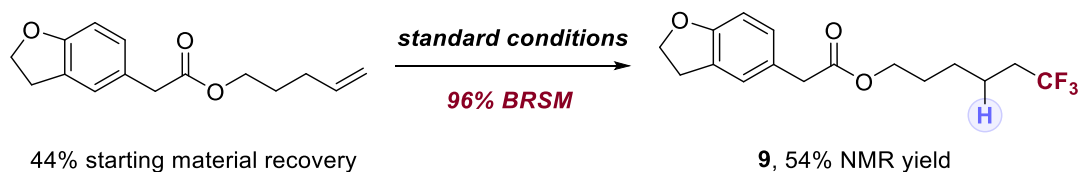

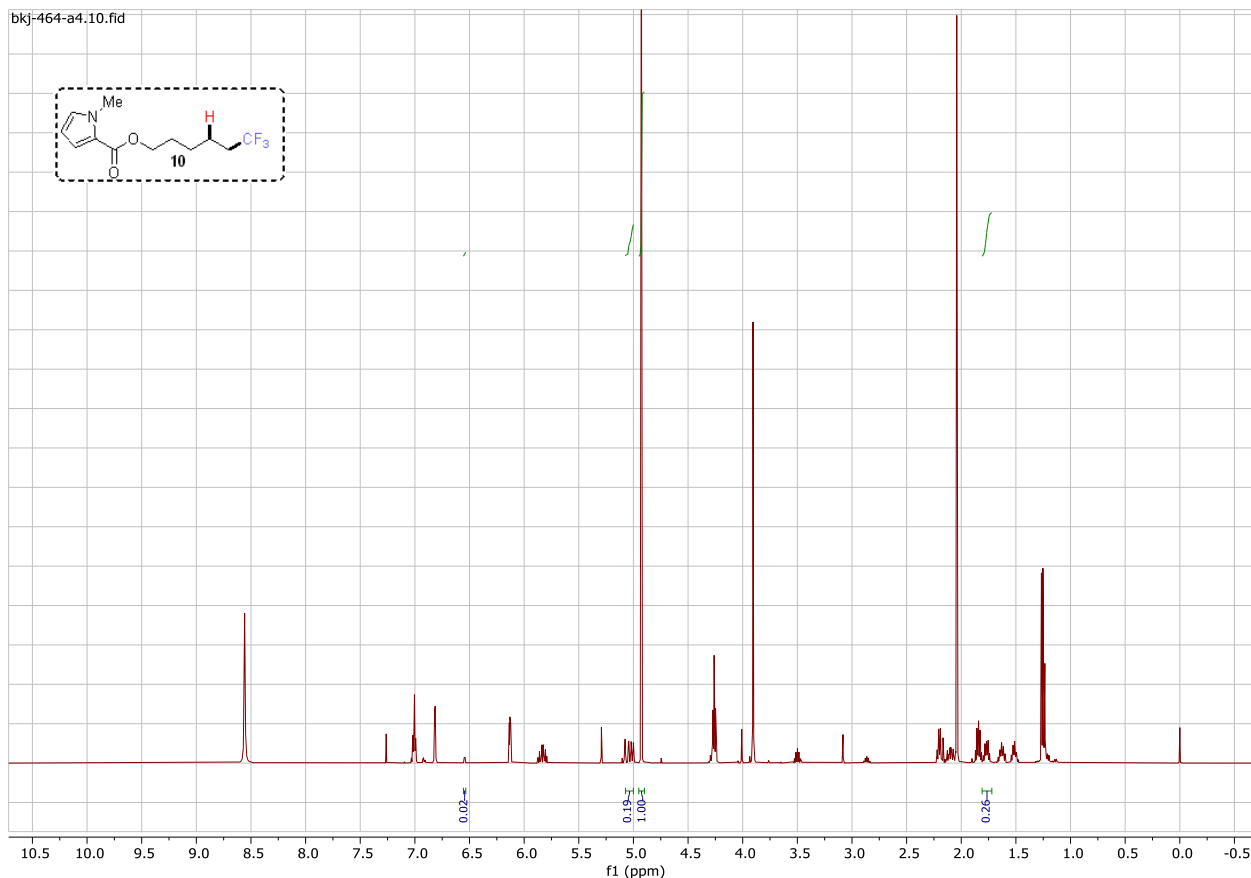

As indicated in the crude  $^1\text{H}$  NMR, **10** is observed in 52% NMR yield at 1.81-1.71 (m, 2H) with 38% residual starting material recovery at (5.07-5.00, m, 1H) (in regard to 0.1 mmol  $\text{CH}_2\text{Br}_2$  as internal standard). The mass-balance is 90% from these two species.

The reduced mass balance from can be explained by slightly competitive trifluoromethylation of the pyrrole ring (diagnostic peak at 6.56-6.53 (m, 1H)) to form trifluoromethylated starting material **10'** (single isomer), accounting for 8% NMR yield. This species has been isolated and characterization is provided below. With this, the overall mass balance is 98%.

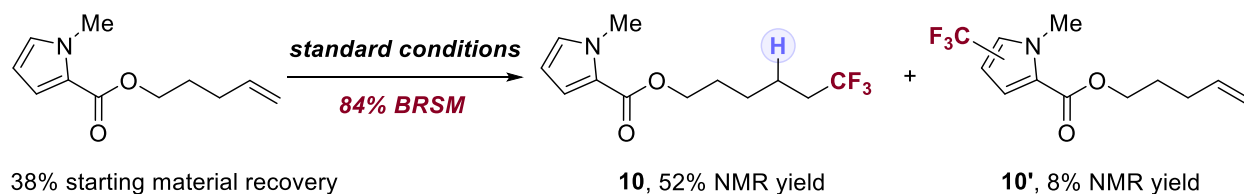



The characterization data of **10'** is shown below,

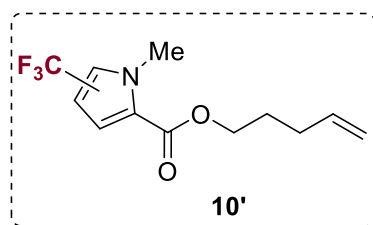

<sup>1</sup>H NMR (600 MHz, Chloroform-*d*) δ 6.89 (d, *J* = 4.1 Hz, 1H), 6.53 (d, *J* = 4.1 Hz, 1H), 5.89-5.79 (m, 1H), 5.10 – 4.97 (m, 2H), 4.27 (t, *J* = 6.6 Hz, 2H), 4.02 (s, 3H), 2.22 – 2.17 (m, 2H), 1.86 – 1.80 (m, 2H). <sup>13</sup>C NMR (151 MHz, CDCl<sub>3</sub>, 3 mm tube) δ 160.83, 137.36, 120.68 (q, *J* = 267.8 Hz), 115.93 (q, *J* = 2.4 Hz), 115.46, 110.34 (q, *J* = 7.6 Hz), 63.89, 30.12, 27.87. <sup>19</sup>F NMR (565 MHz, Chloroform-*d*) δ -59.62. HRMS APCI: [M+H]<sup>+</sup> calcd. for C<sub>12</sub>H<sub>15</sub>F<sub>3</sub>NO<sub>2</sub>: 262.1049; Found 262.1054

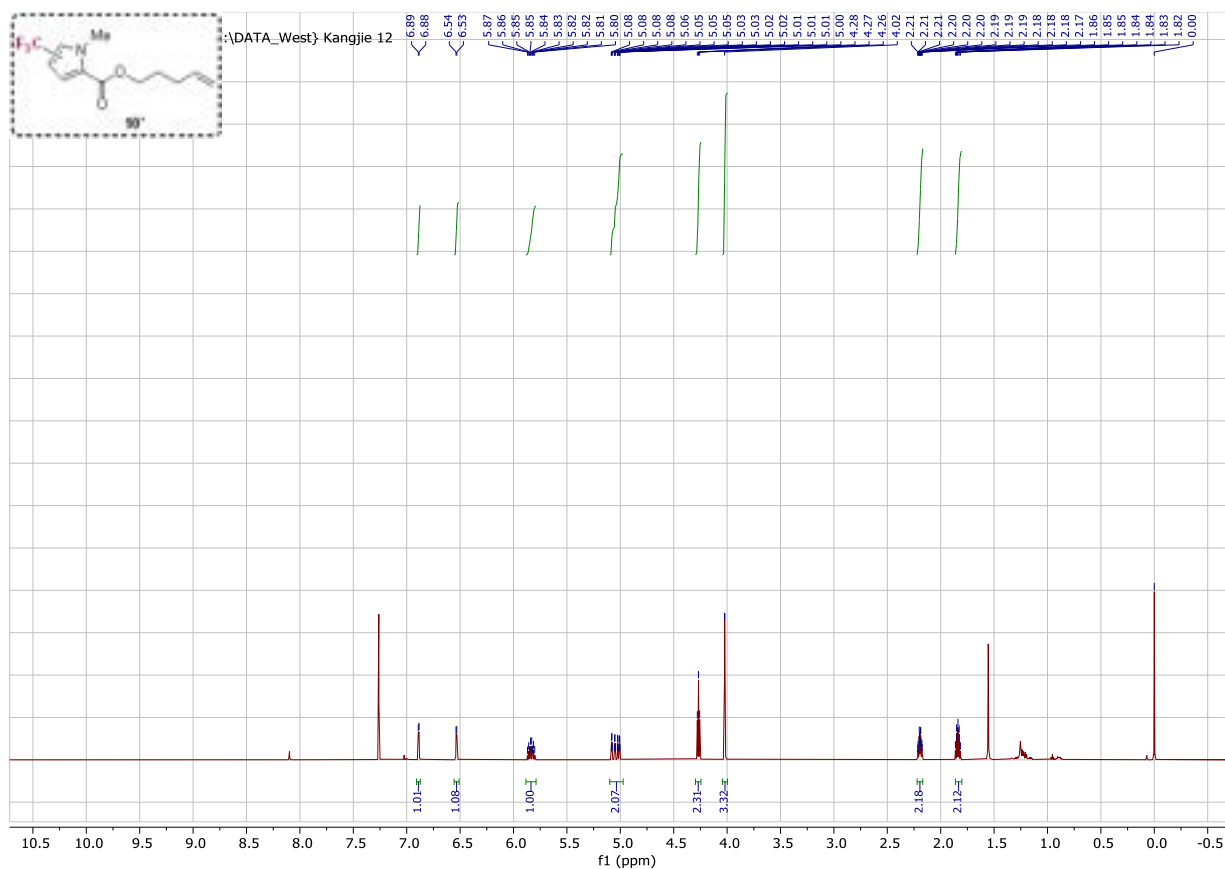

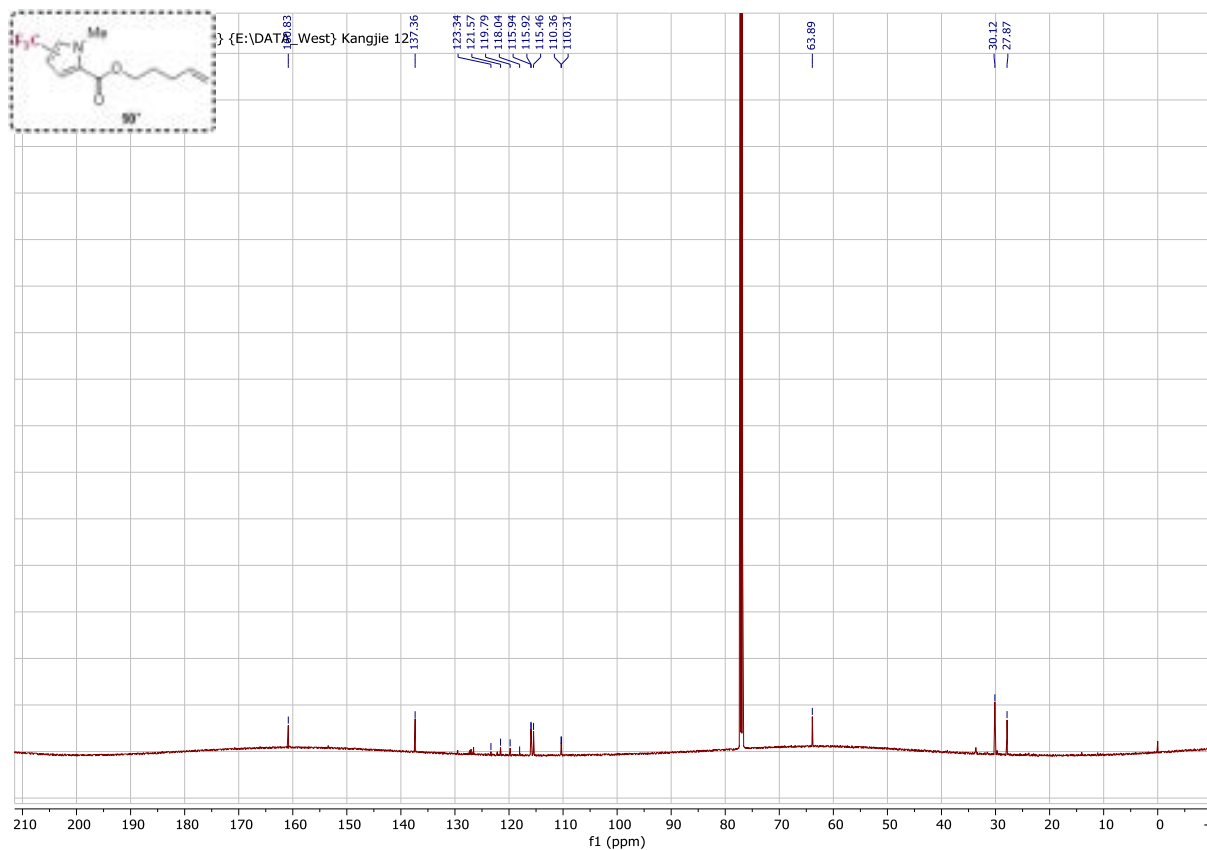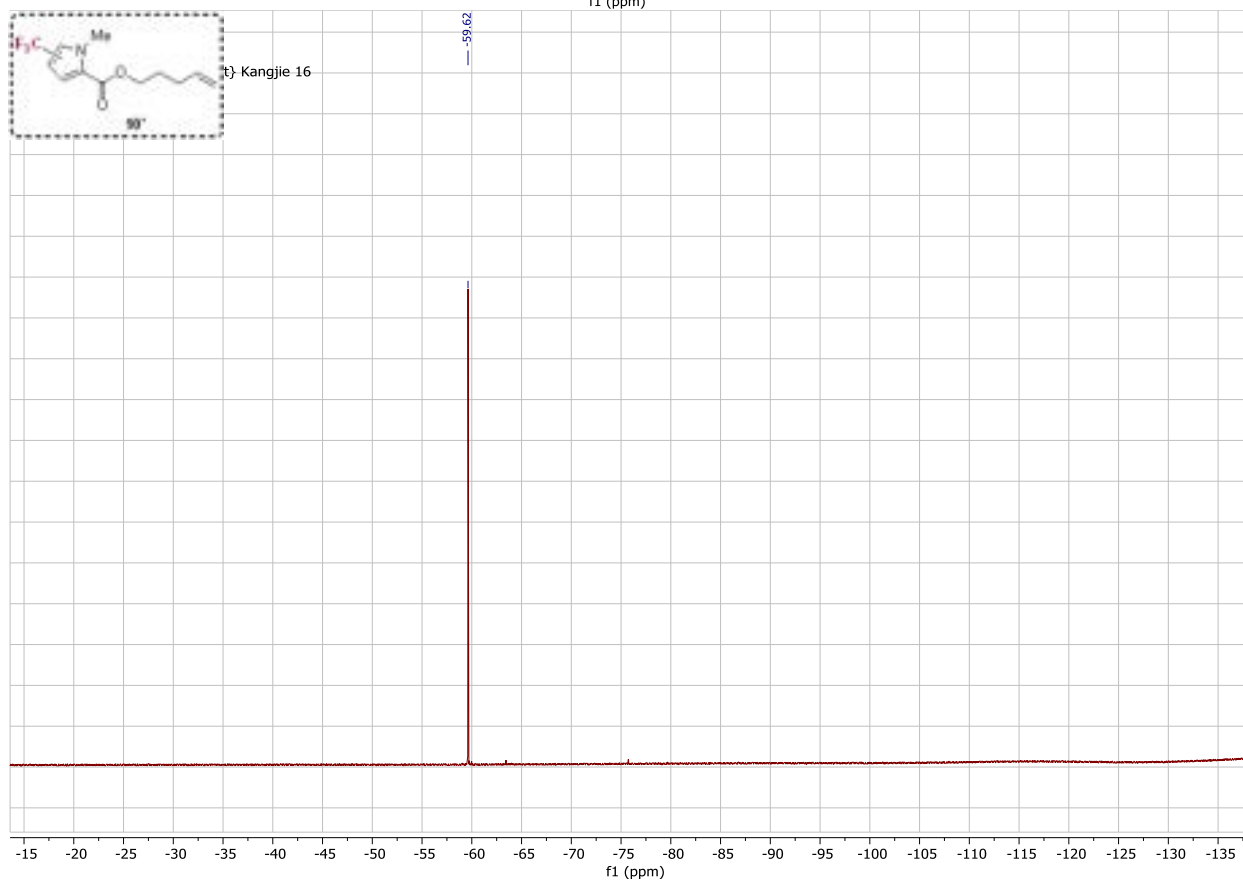

## Difluoromethylation examples.

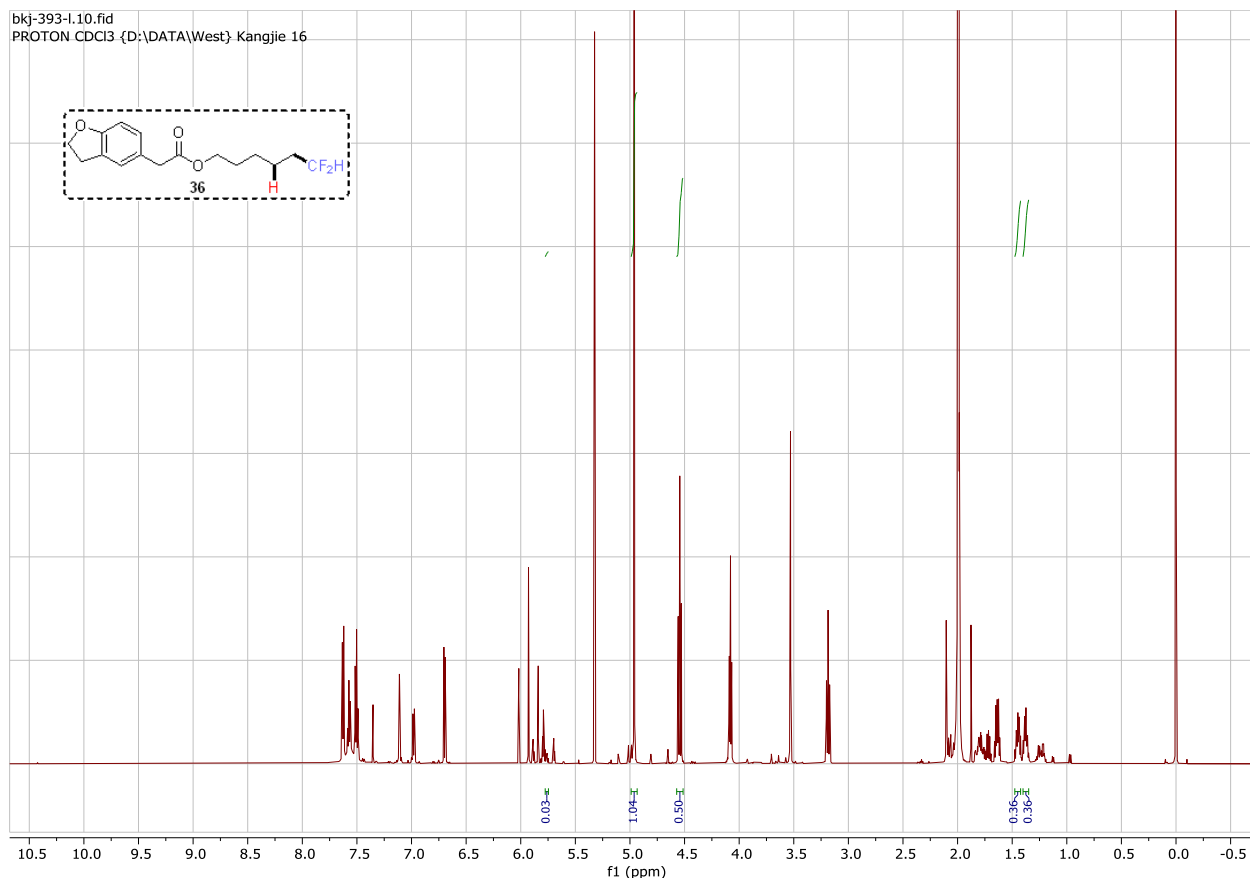

As indicated in the crude  $^1\text{H}$  NMR, **36** is produced in 72% NMR yield (1.48-1.42, m, 2H) with 24% residual starting material at 5.81-5.74 (partially overlapped with product peak) (m, 1H) (in regard to 0.1 mmol  $\text{CH}_2\text{Br}_2$  as internal standard). The internal standard is slightly overlapped with substrate peak which shows integration of 1.04 at 4.9 ppm. No other significant products are observed. The mass balance is approximately 96%.

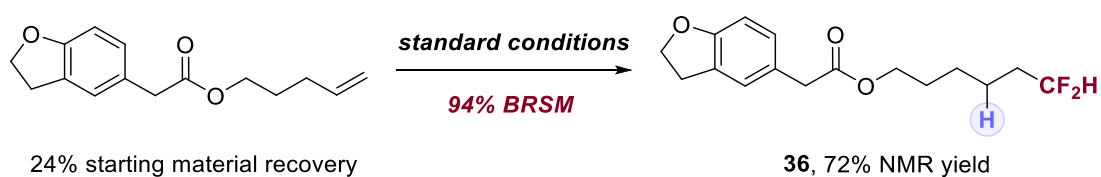



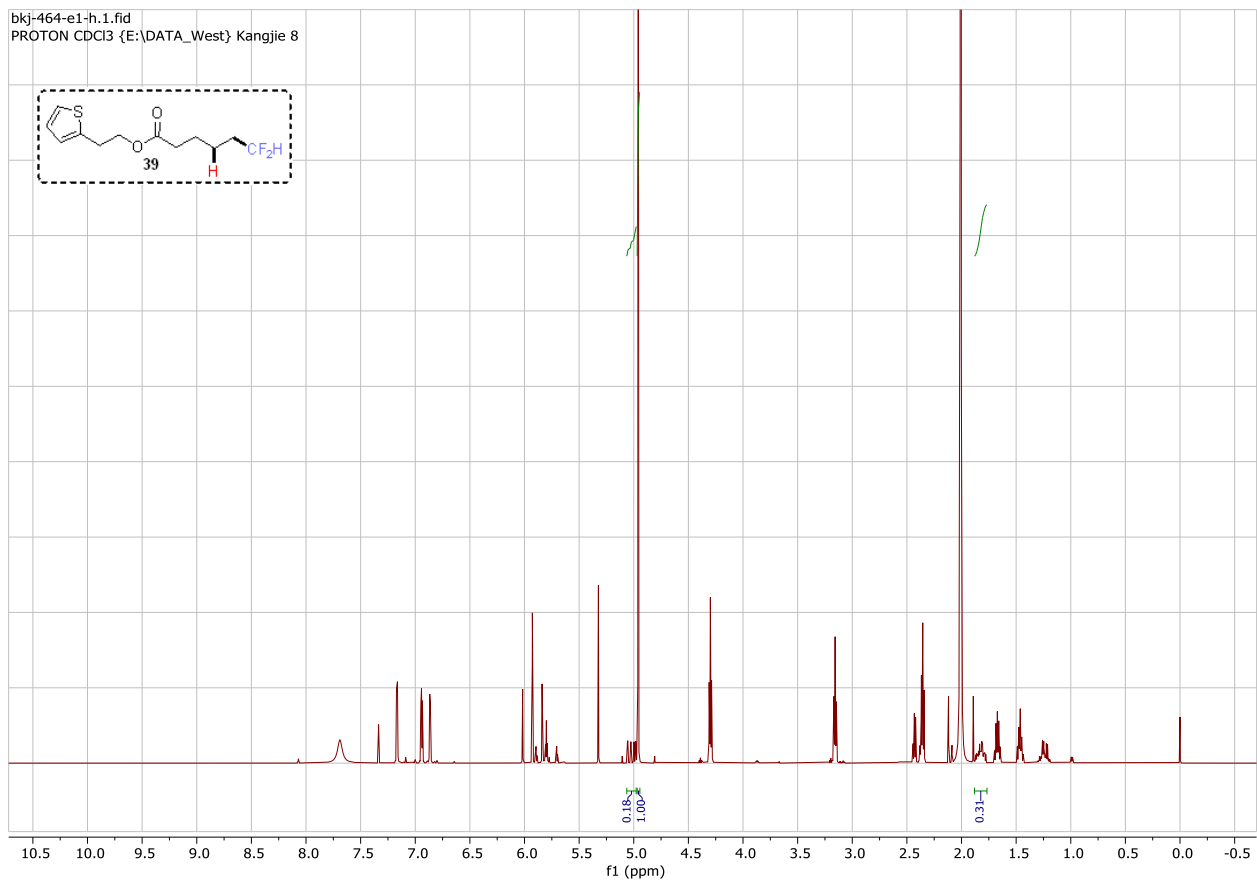

As indicated in the crude  $^1\text{H}$  NMR, **39** is produced in 62% NMR yield (1.88-1.77, m, 2H) with 36% residual starting material at 5.07-4.98 (m, 1H) (in regard to 0.1 mmol  $\text{CH}_2\text{Br}_2$  as internal standard). No other significant products are observed. The mass-balance of the reaction is 98%.

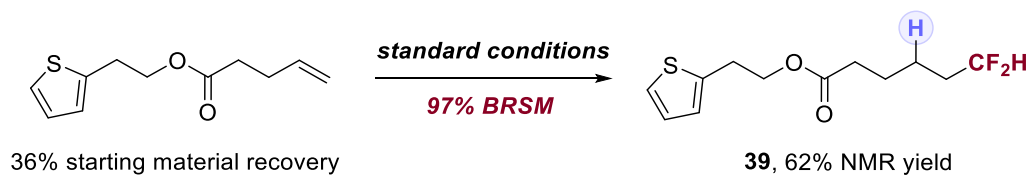

## Mass balance studies of representative substrates

### Hydrotrifluoromethylation of representative examples

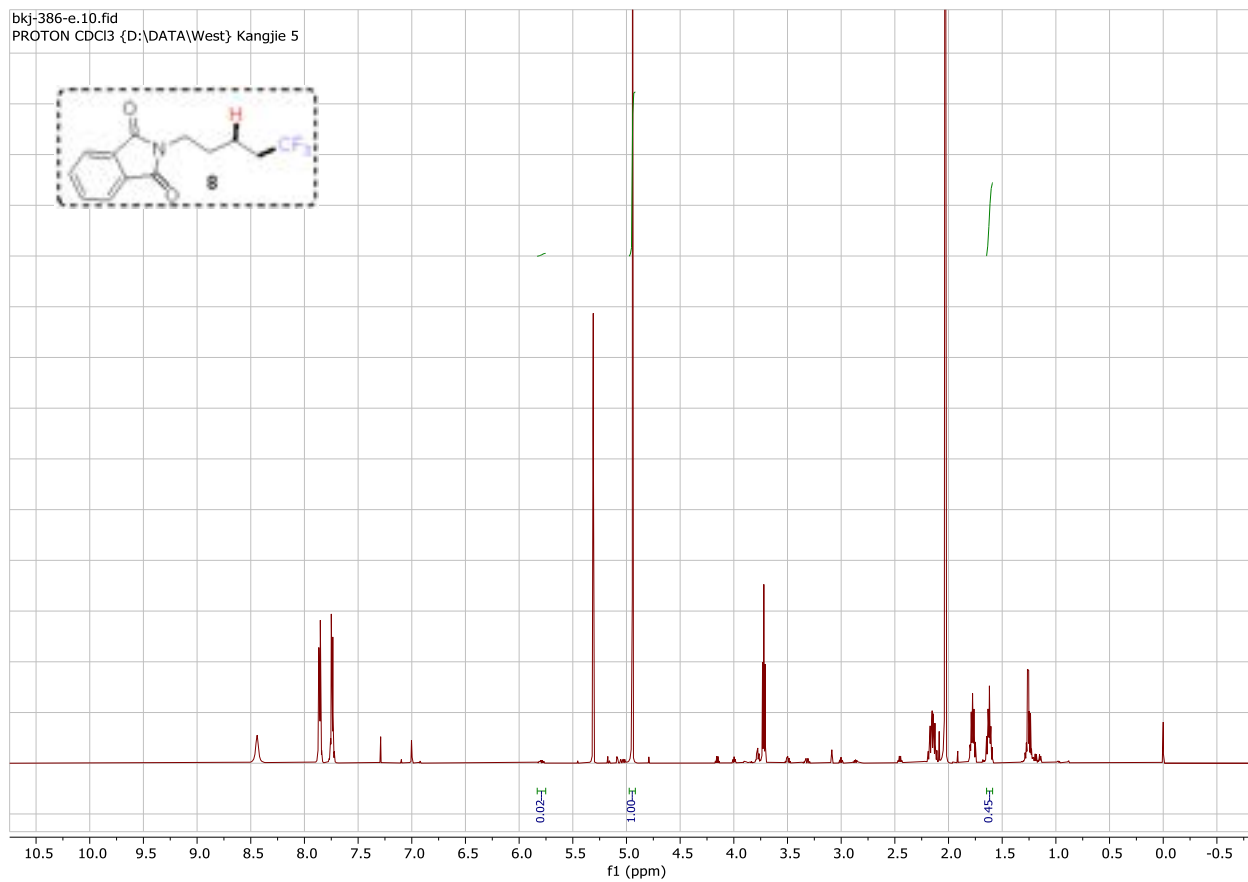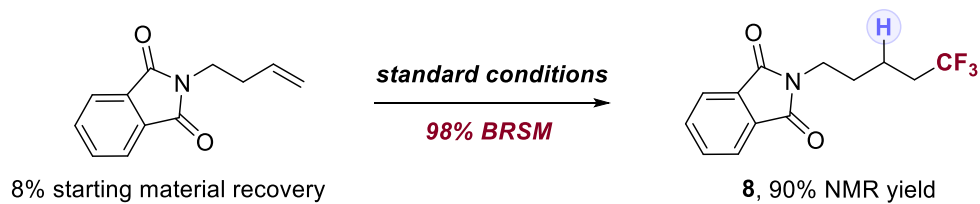

bkj-386-ae-a.10.fid  
PROTON CDCl3 {D:\DATA\West\ Kangjie 4

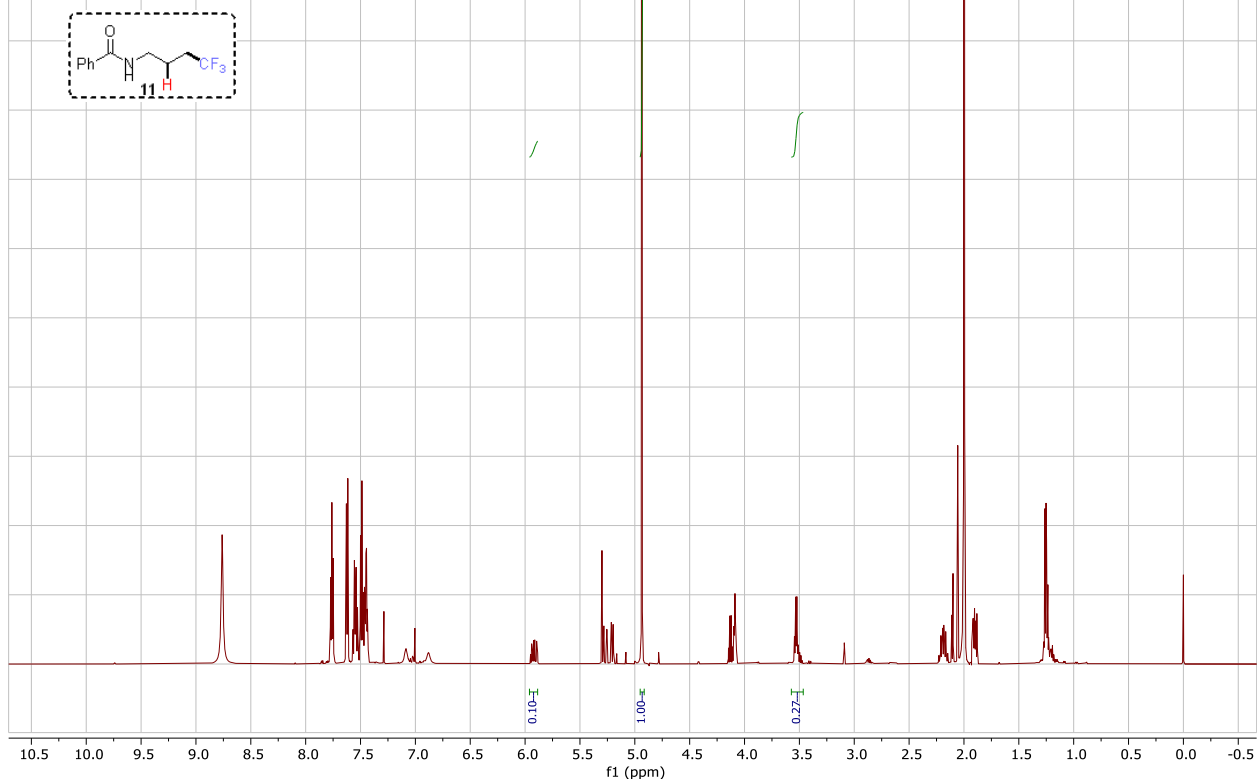

As indicated in the crude  $^1\text{H}$  NMR, **11** is produced in 54% NMR yield at 3.59-3.45 (m, 2H) with 40% residual starting material (5.97-5.87, m, 1H) (in regard to 0.1 mmol  $\text{CH}_2\text{Br}_2$  as internal standard). No other significant products are observed. The mass-balance is 94%.

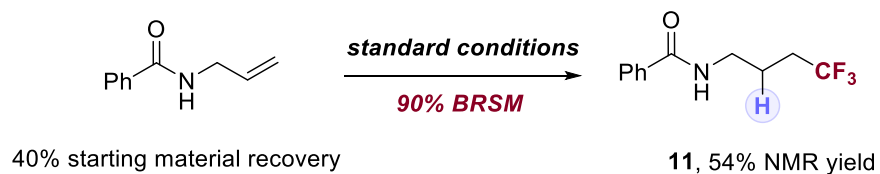

### Hydrodifluoromethylation of representative examples

bkj-393-q.10.fid  
PROTON CDCl3 {D:\DATA\West\ Kangjie 19

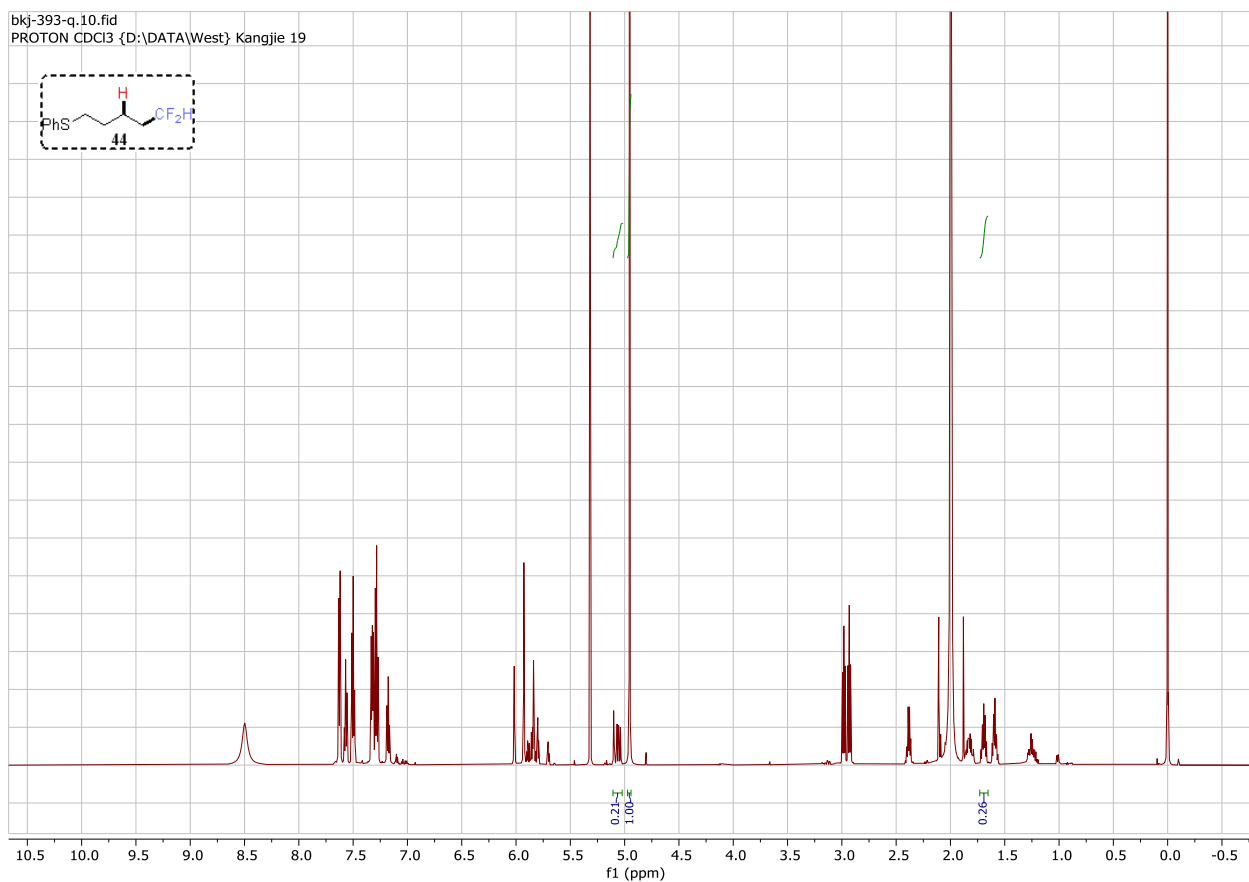

As indicated in the crude  $^1\text{H}$  NMR, **44** is produced in 52% NMR yield at 1.73-1.65 (m, 2H) with 42% residual starting material at (5.11-5.803, m, 2H) (in regard to 0.1 mmol  $\text{CH}_2\text{Br}_2$  as internal standard). No other significant products are observed. The mass-balance is 94%.

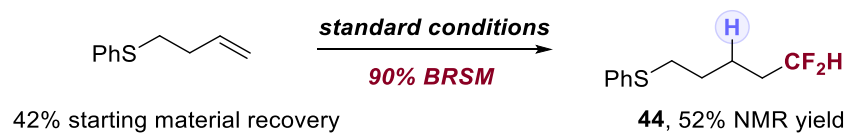



bkj-393-ak.10.fid  
PROTON CDCl3 {D:\DATA\West\ Kangjie 6

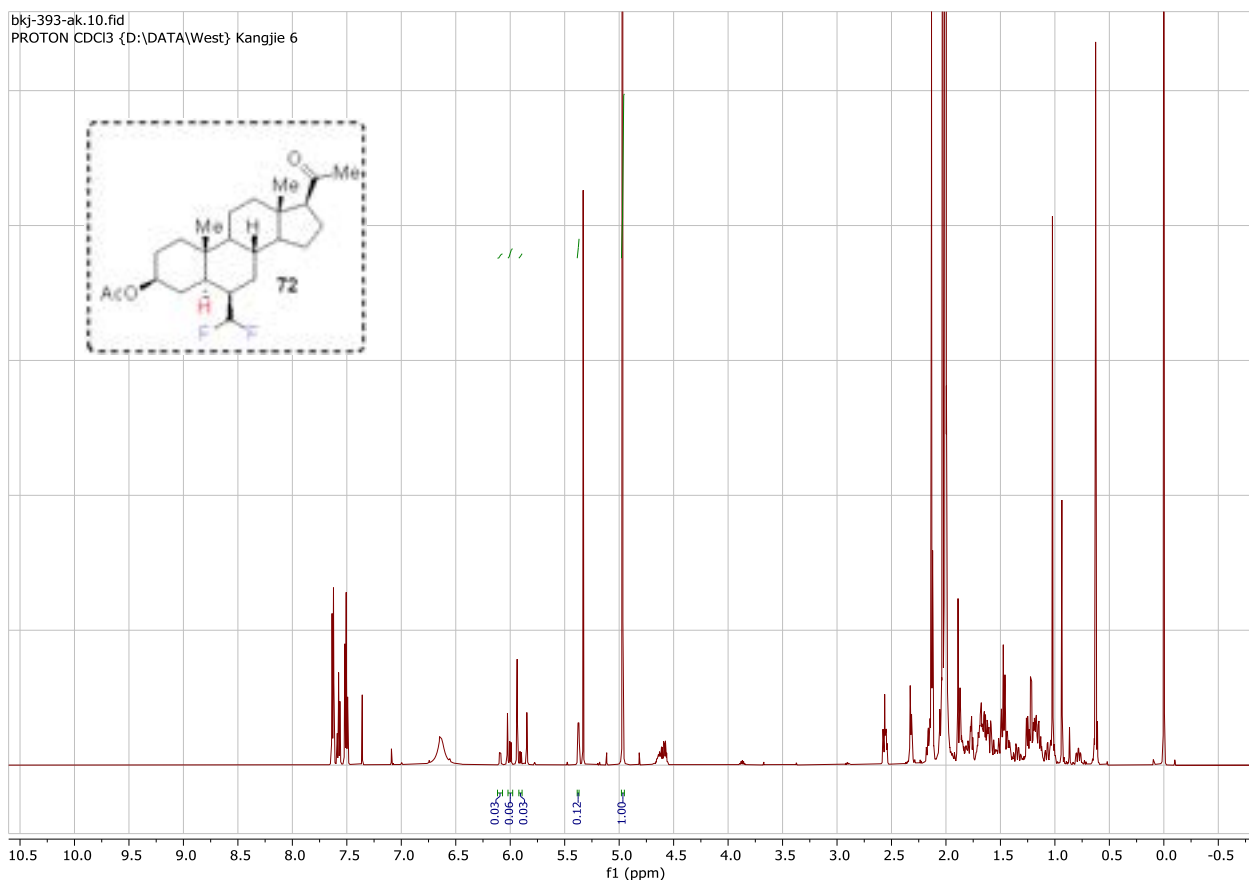

As indicated in the crude  $^1\text{H}$  NMR, **72** is produced in 48% NMR yield at 1.73-1.65 (m, 2H) with 48% residual starting material at 5.39-5.36 (m, 1H) (in regard to 0.1 mmol  $\text{CH}_2\text{Br}_2$  as internal standard). No other significant products are observed. The mass-balance is 96%.

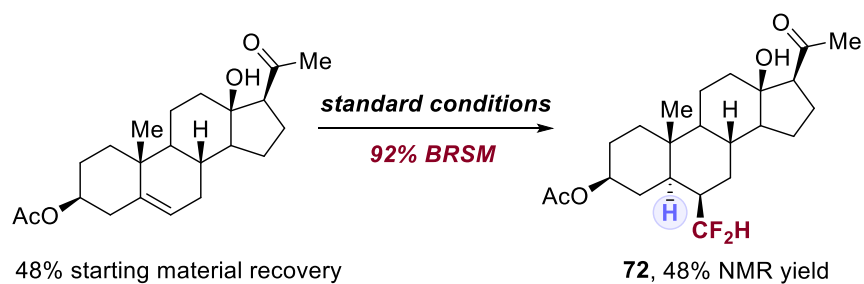

### Hydrofluoroalkylation of a representative substrate

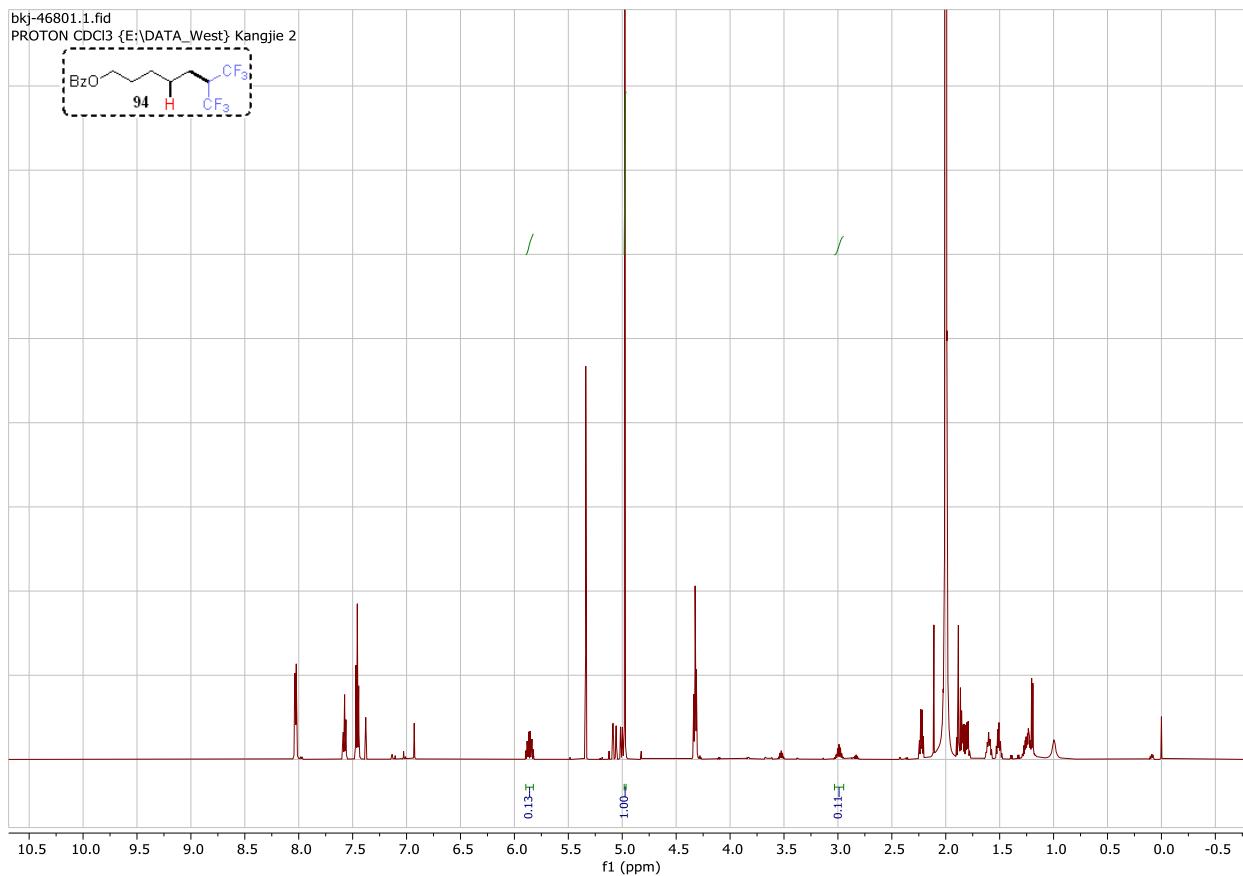

As indicated in the crude  $^1\text{H}$  NMR, **94** is produced in 44% NMR yield at 3.03-2.95 (m, 1H) with 52% residual starting material at 5.90-5.82 (m, 1H) (in regard to 0.1 mmol  $\text{CH}_2\text{Br}_2$  as internal standard). No other significant products are observed. The mass-balance is 96%.

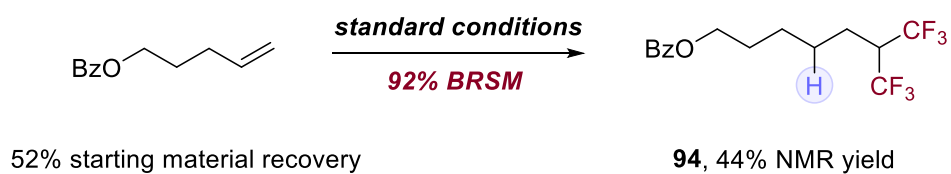

### **III. Supplemental Figure**

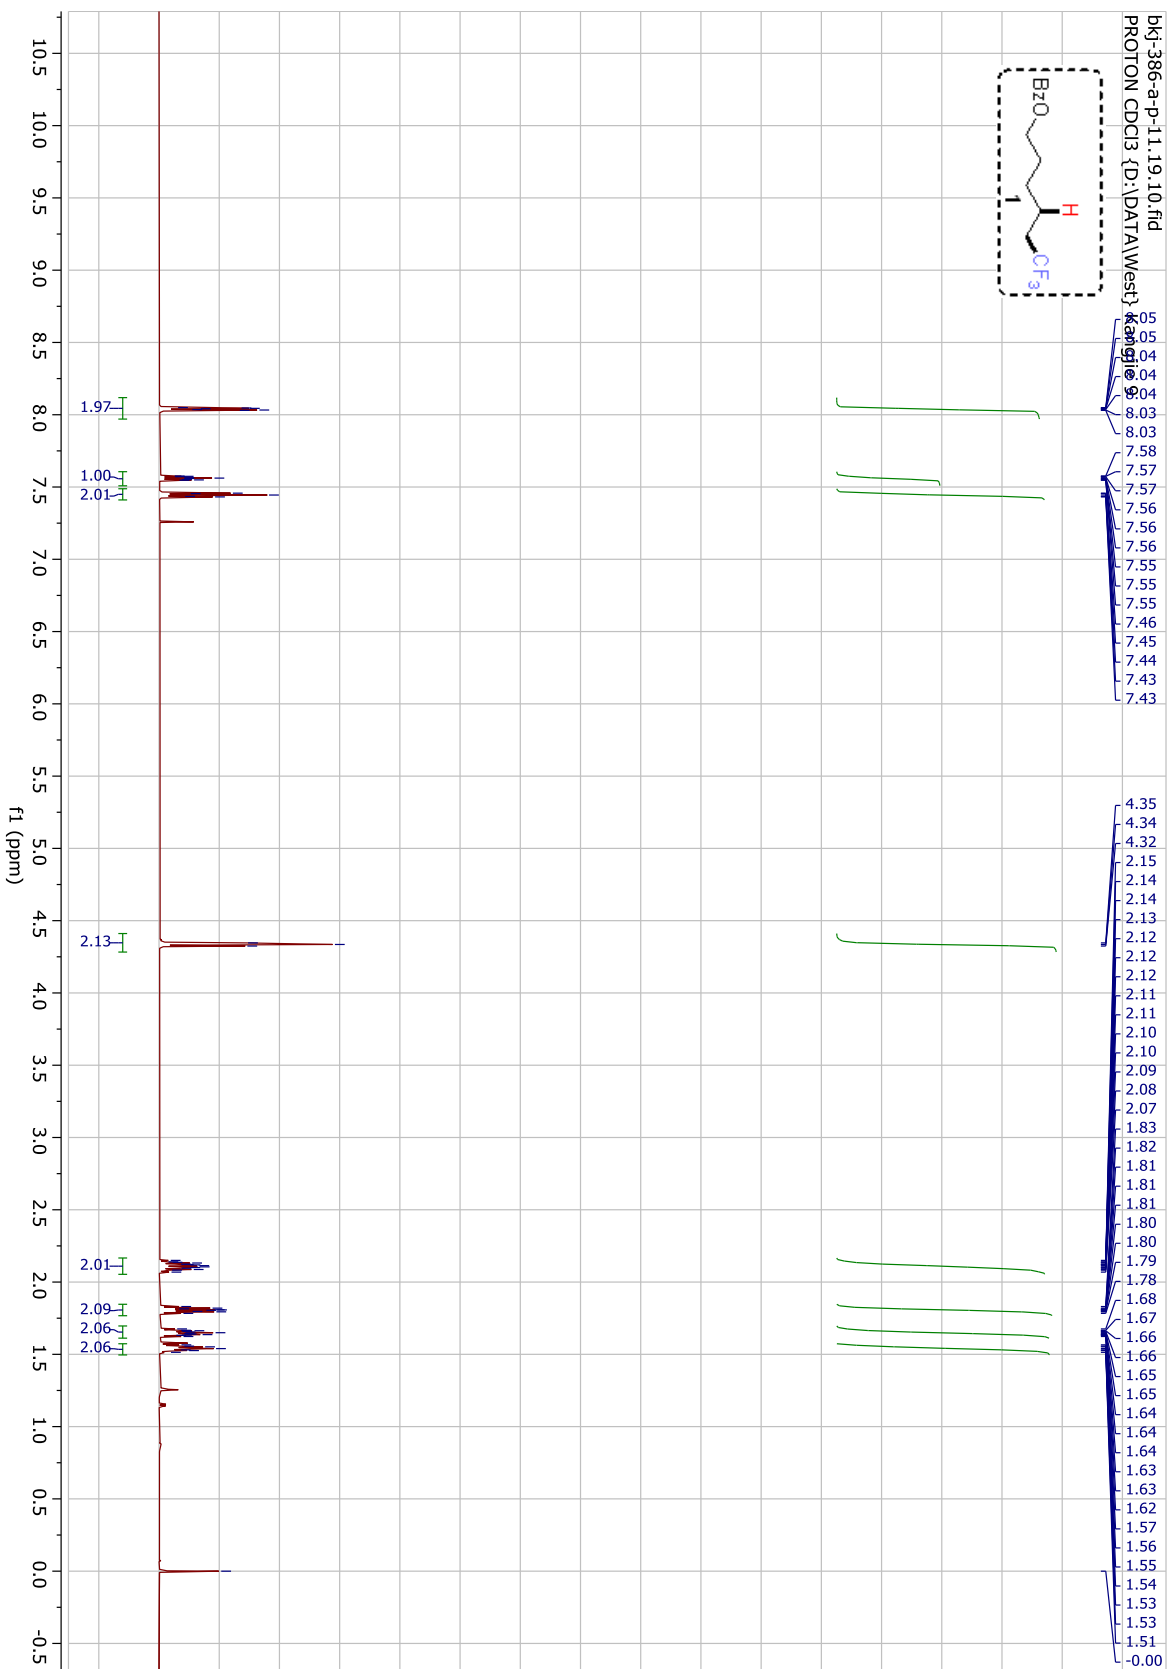

bkj-386-a-p-1:19.11.fid  
C13CPD CDCl3 (D:\DATA\West) Kanjil

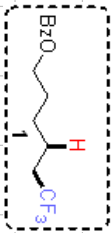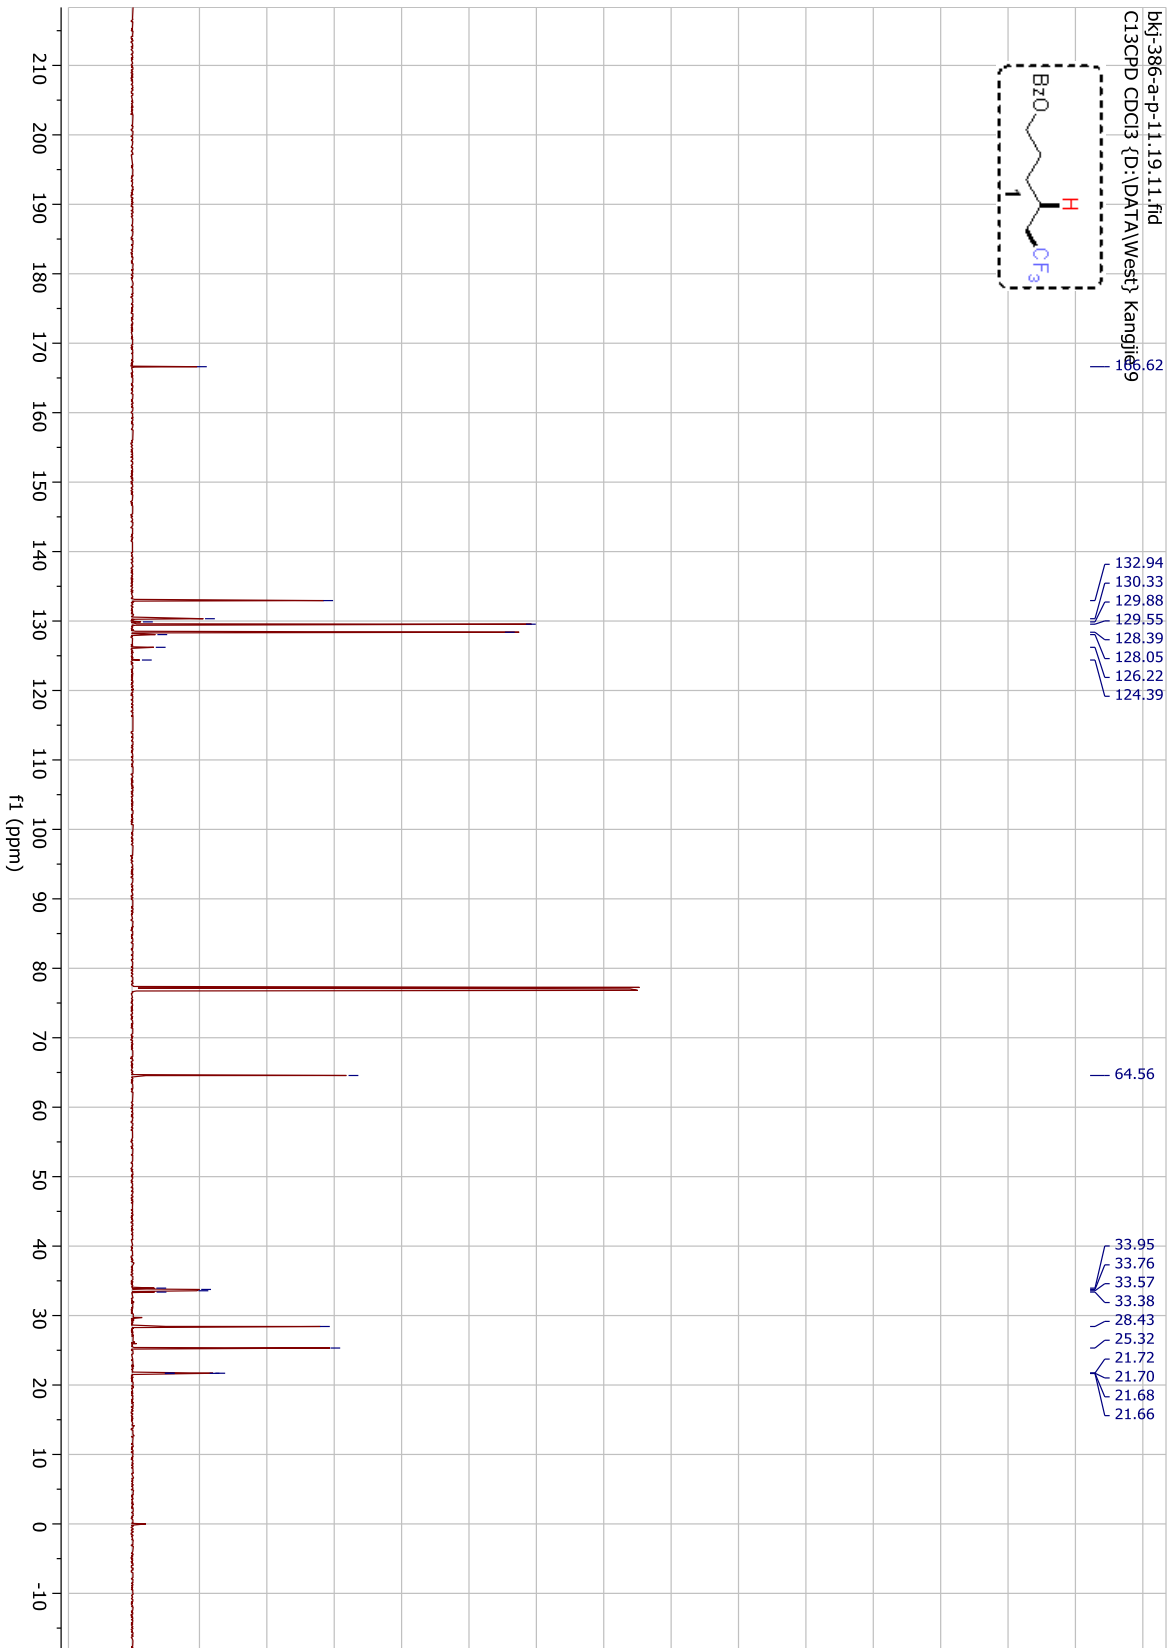

bkj-386-a-p-11.19.12.fid  
F19\_baseline\_correct ID  
F19\_baseline\_correct F1919\_19\DATA\West\ Kangjie 9

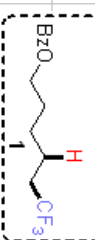

66.36  
66.38  
66.40

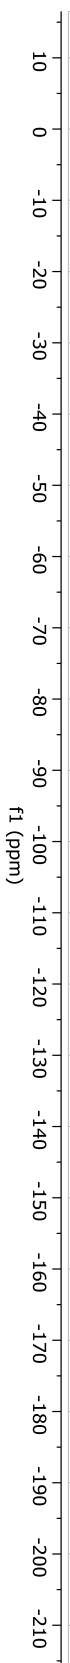

bk1-386-1-p-h-11.18.10.fid  
PROTON CDCl3 {D:\DATA\West\Kangjie 23

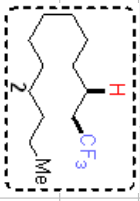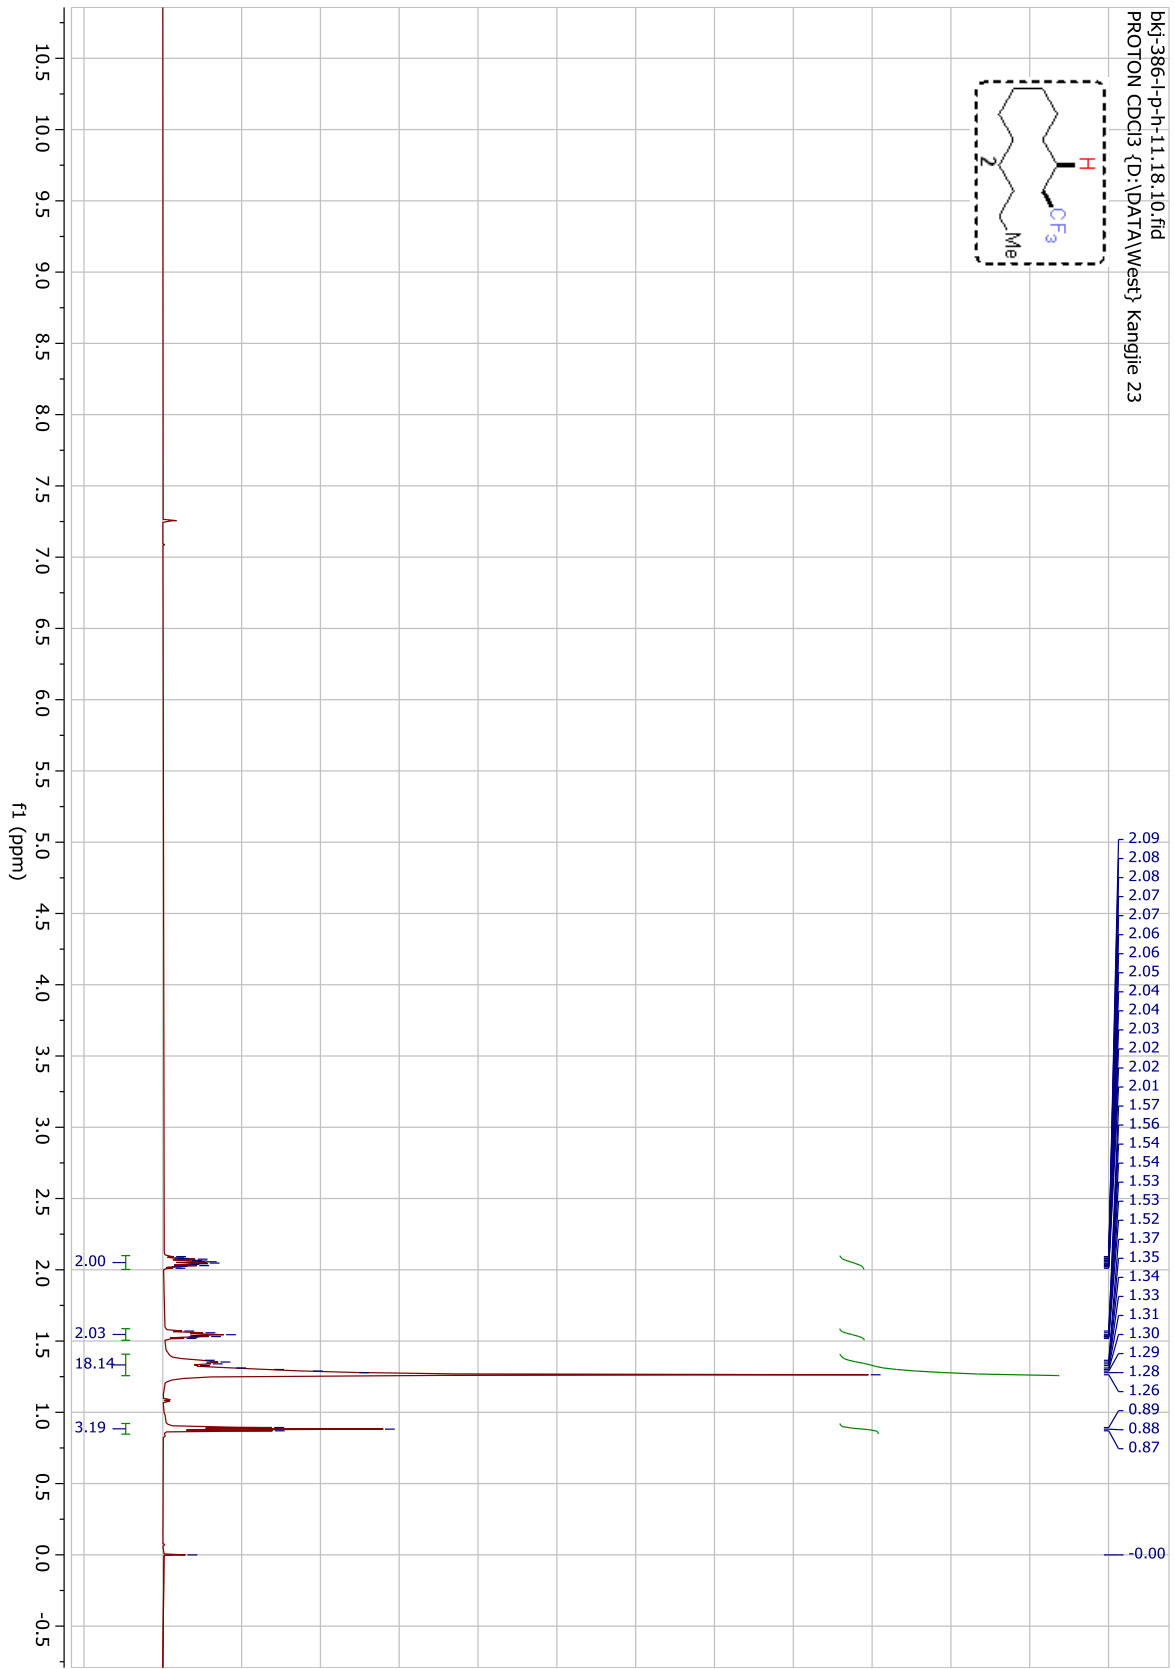

hkl-386-1-p-c-11.18.10.fid  
C13CPD CDCl3 (D:\DATA\Westj Kangjie 23

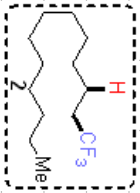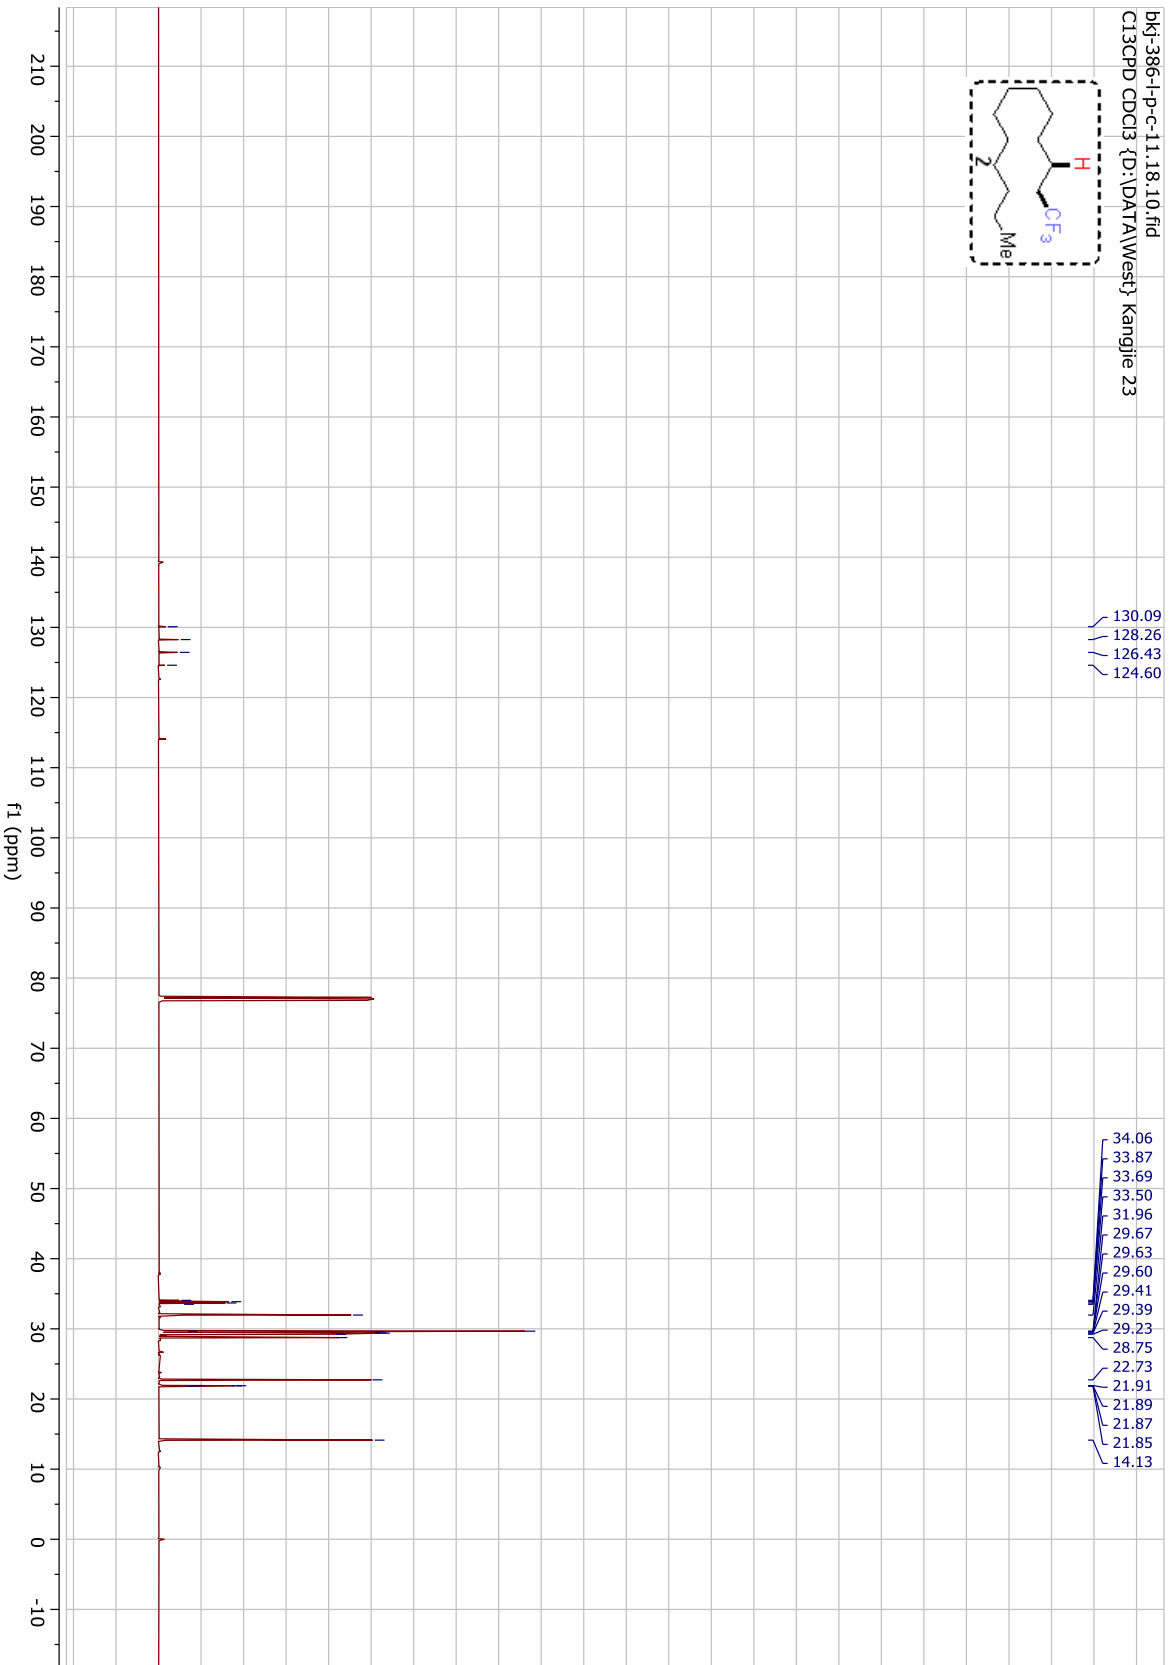



bkj-386-l-p-h-11.18.11.fid  
F19\_baseline\_correct ID  
F19\_baseline\_correct F1919 {D:\DATA\West} Kangjie 23

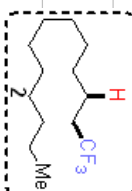

-66.46  
-66.48  
-66.50

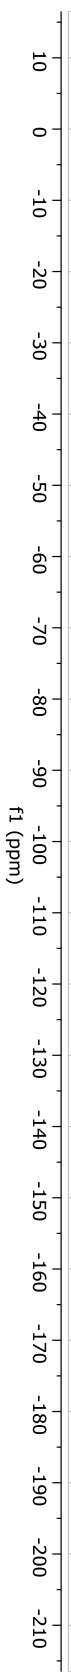

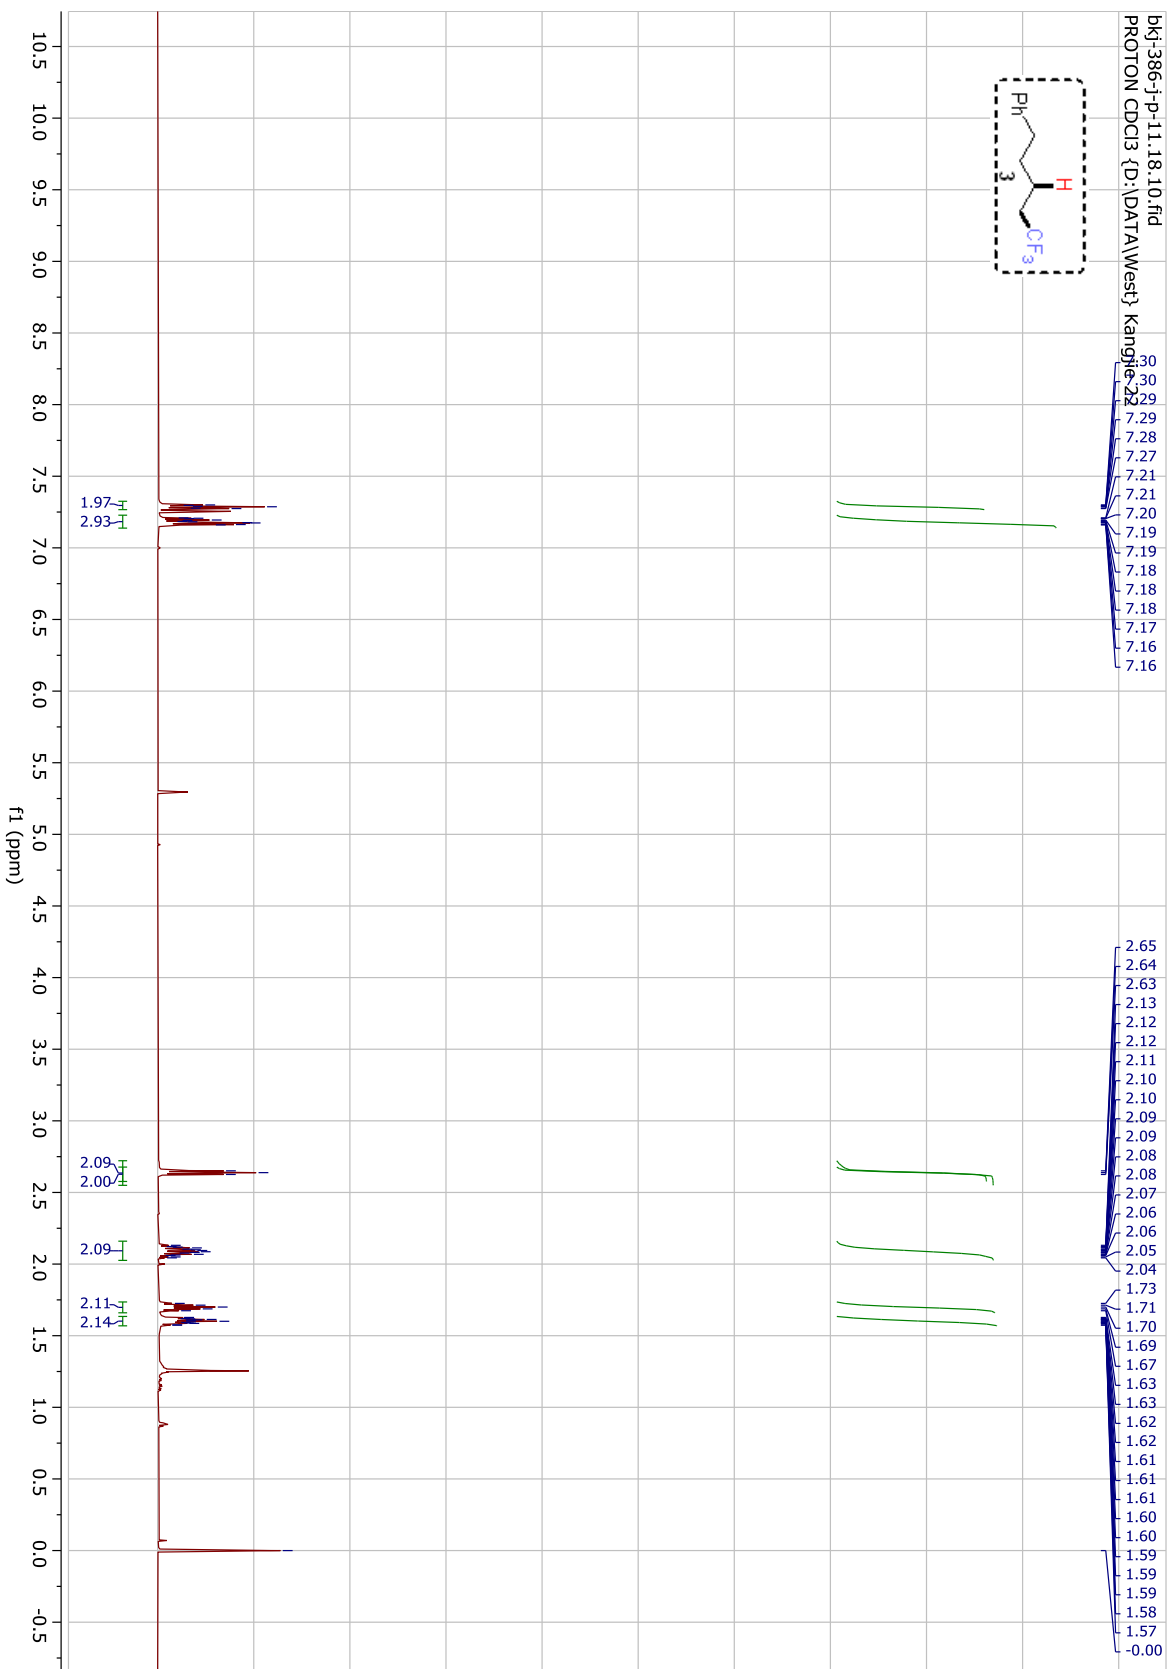

bkj-386-j-p-11.18.11.fid  
C13CPD CDCl3 (D:\DATA\Westj Kangjie 22

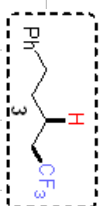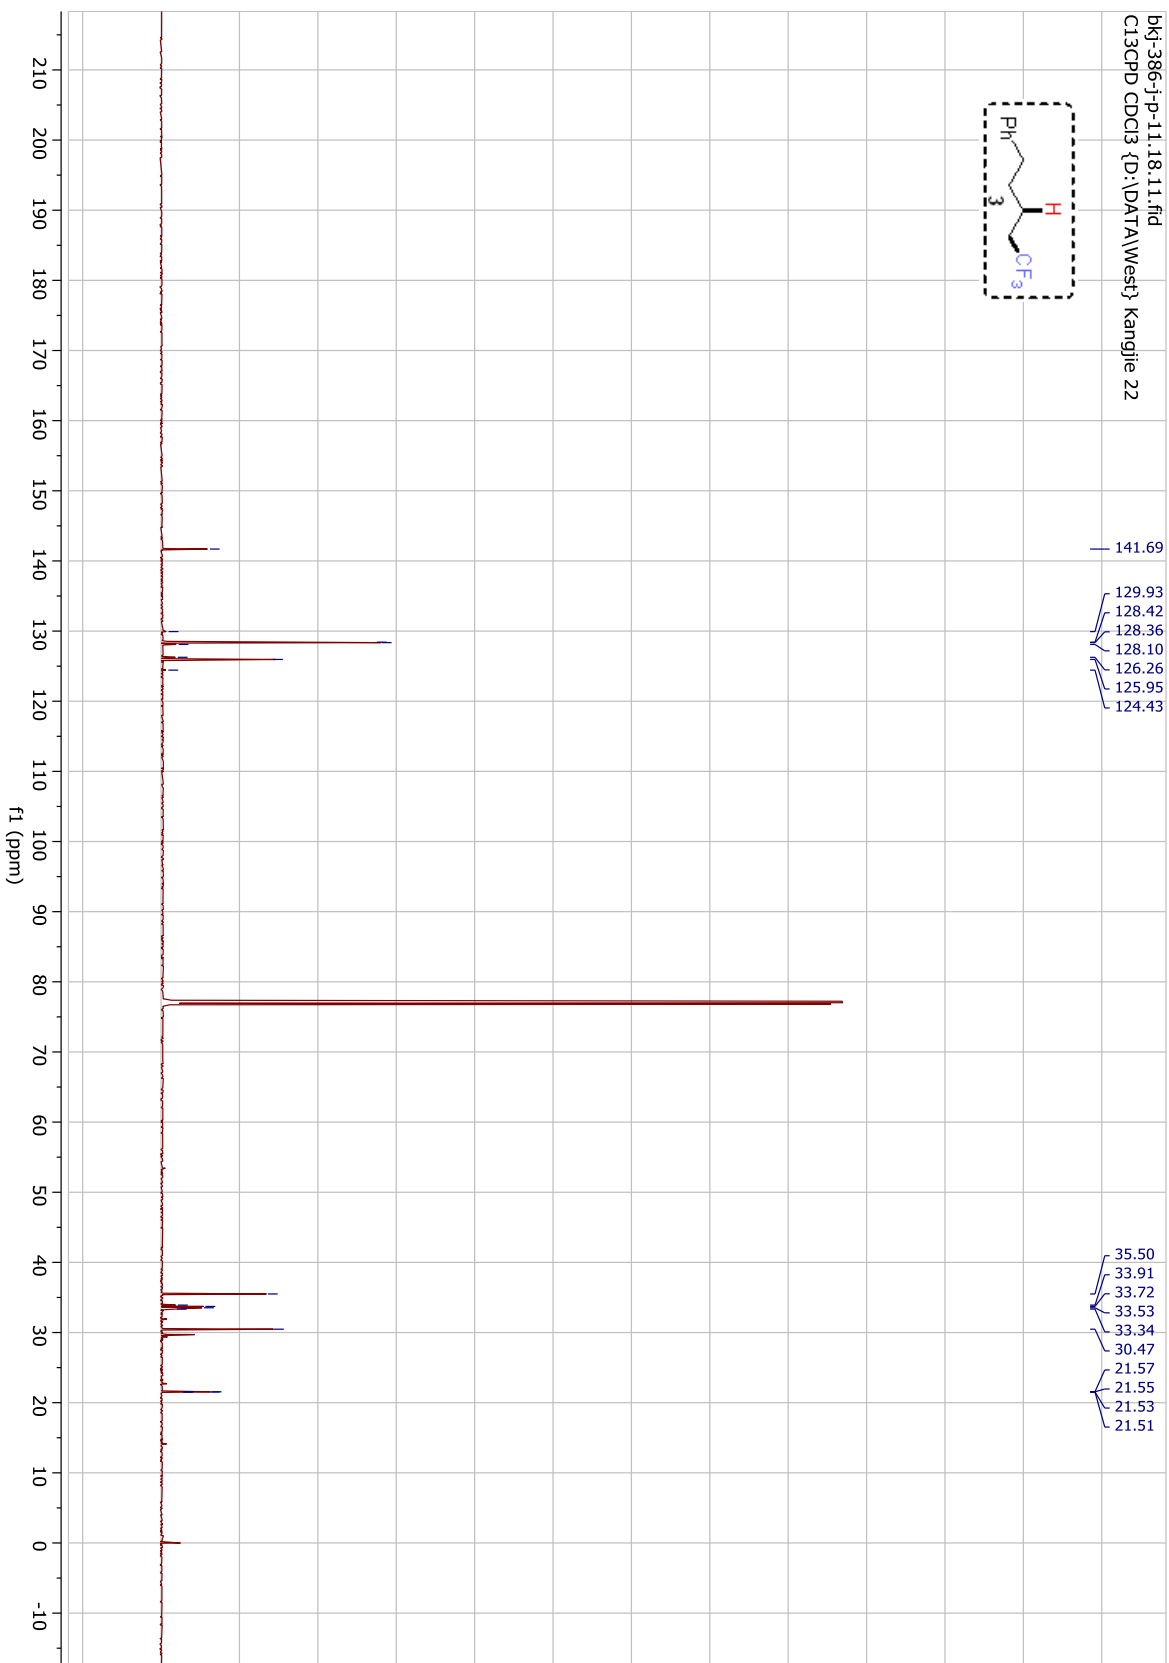

bkj-386-j-p-11.18.12.fid  
F19\_baseline\_correct\_1D  
F19\_baseline\_correct CDCl3 {D:\DATA\West\ Kangjie 22

96.30  
96.32  
96.33  
96.34

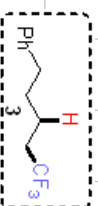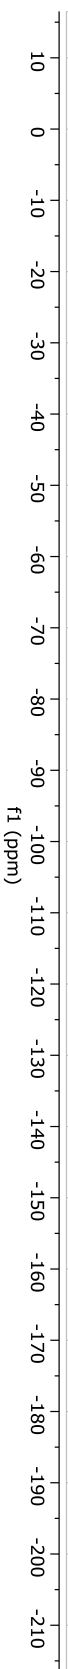

bkt-386-b-p-11.17.10.fid  
PROTON CDCl3 {D:\DATA\West\ Kangjie 9

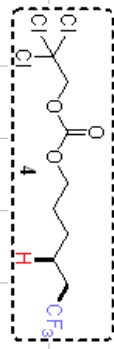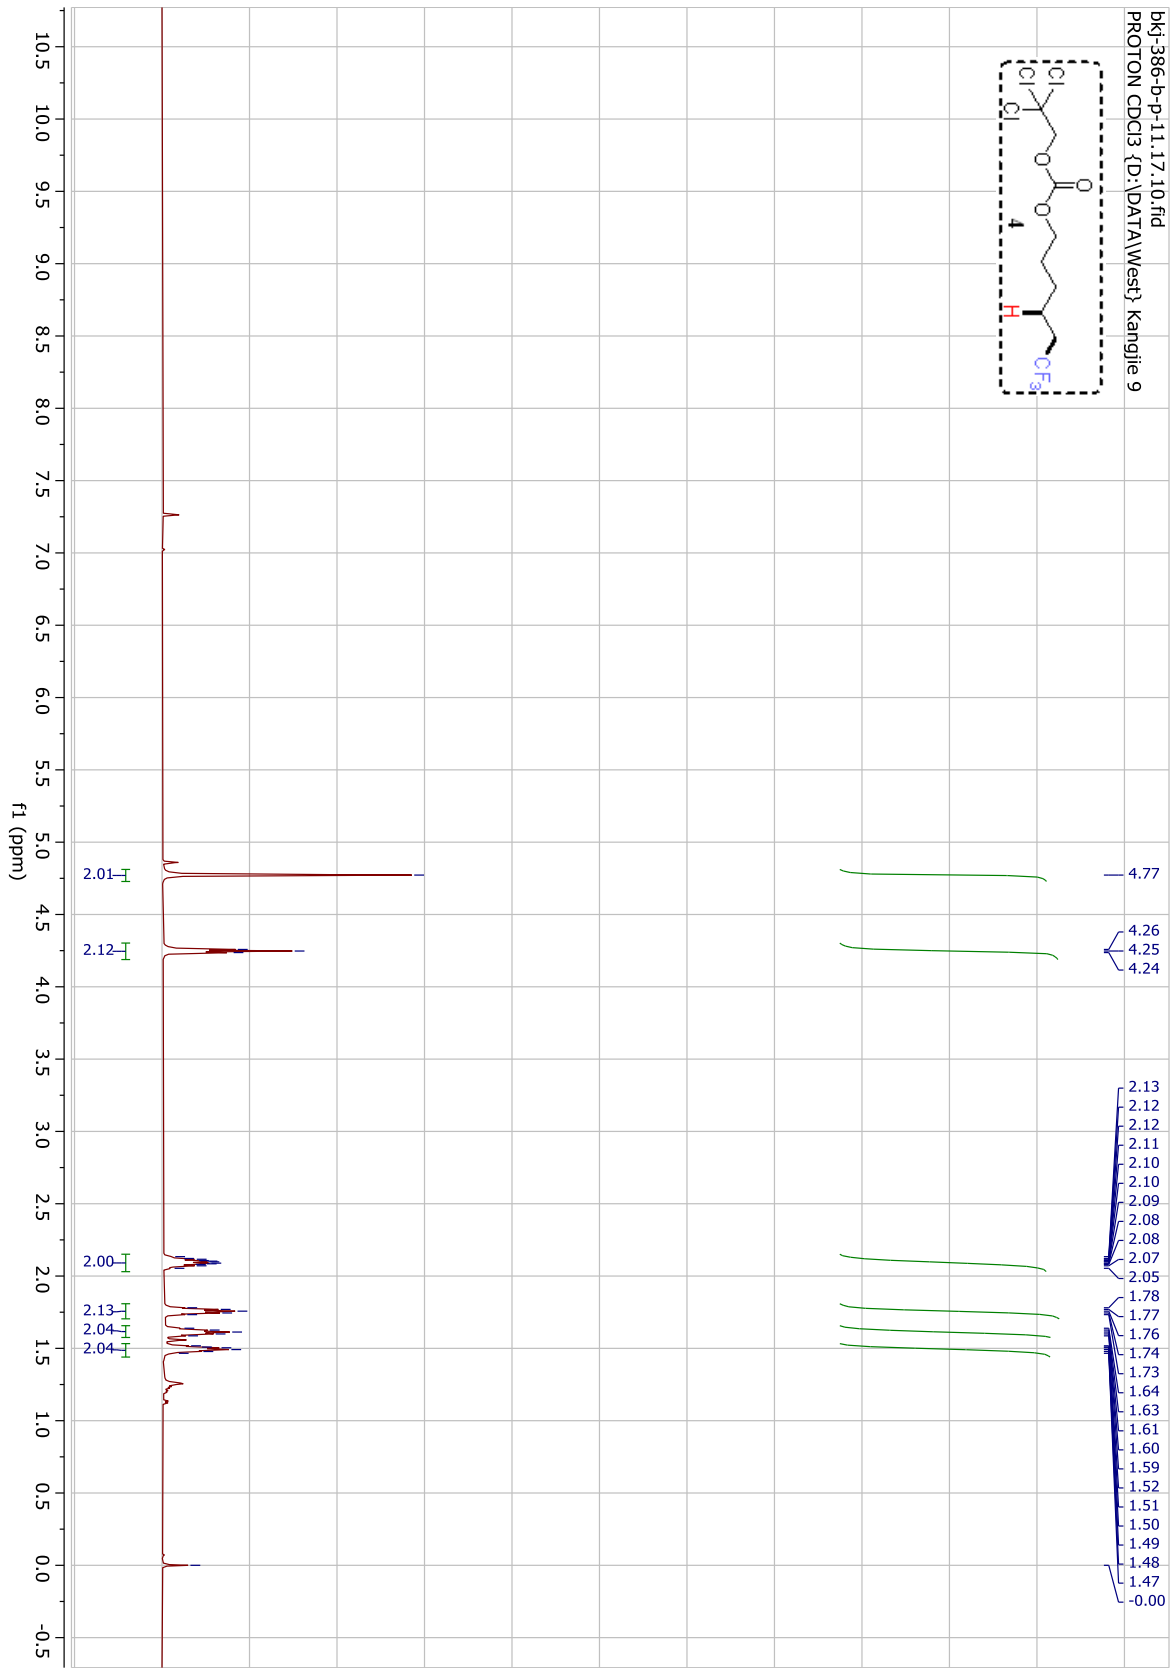

bkj-386-b-p-11.17.11.fid  
C13CPD CDCl3 (D:\DATA\Westj Kangjie 9

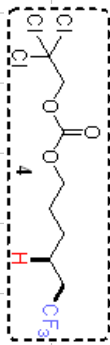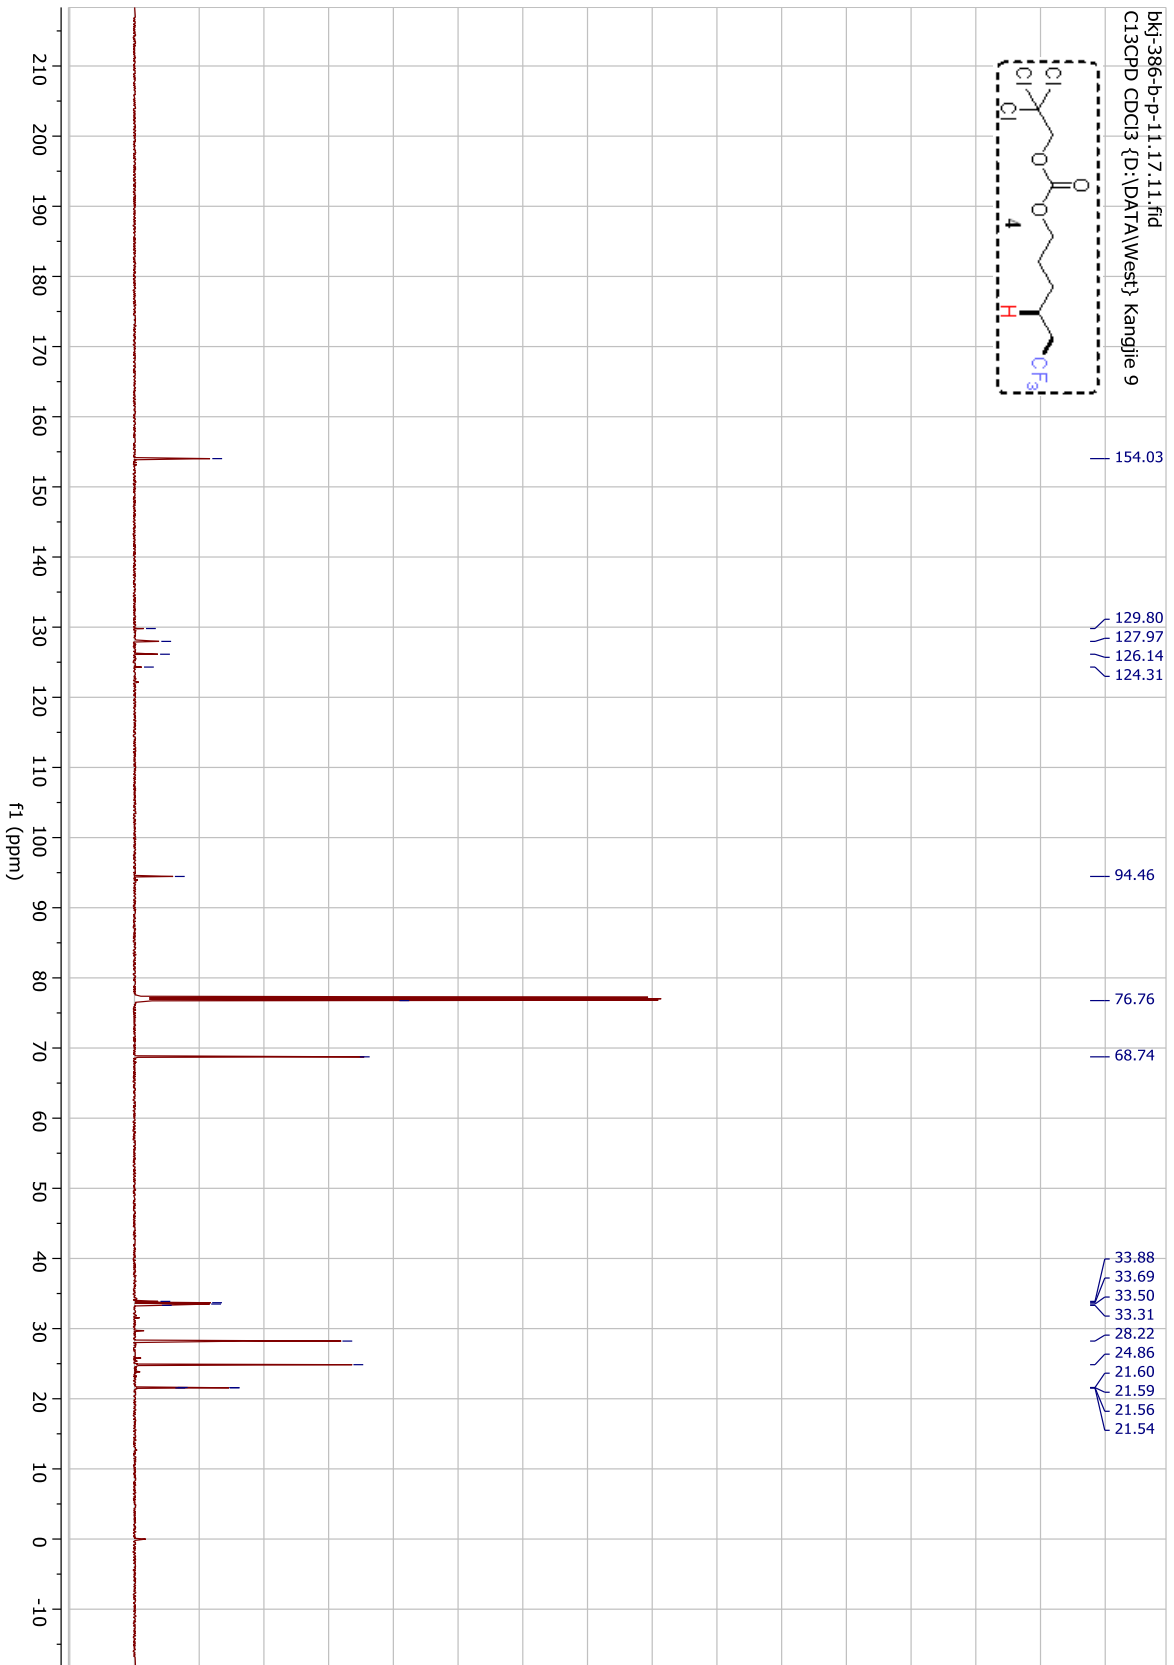

bkj-386-b-p-11.17.12.fid  
F19\_baseline\_correct\_1D  
F19\_baseline\_correct\_C13 {D:\DATA\West}\Kangjie 9

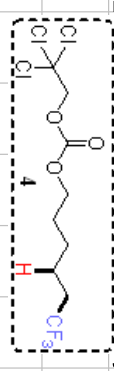

-66.37  
-66.39  
-66.41

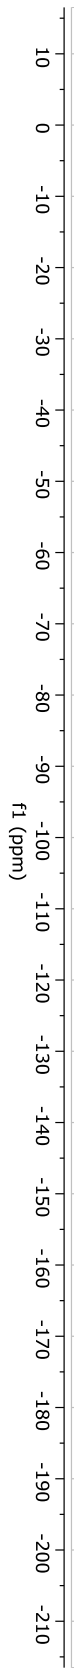

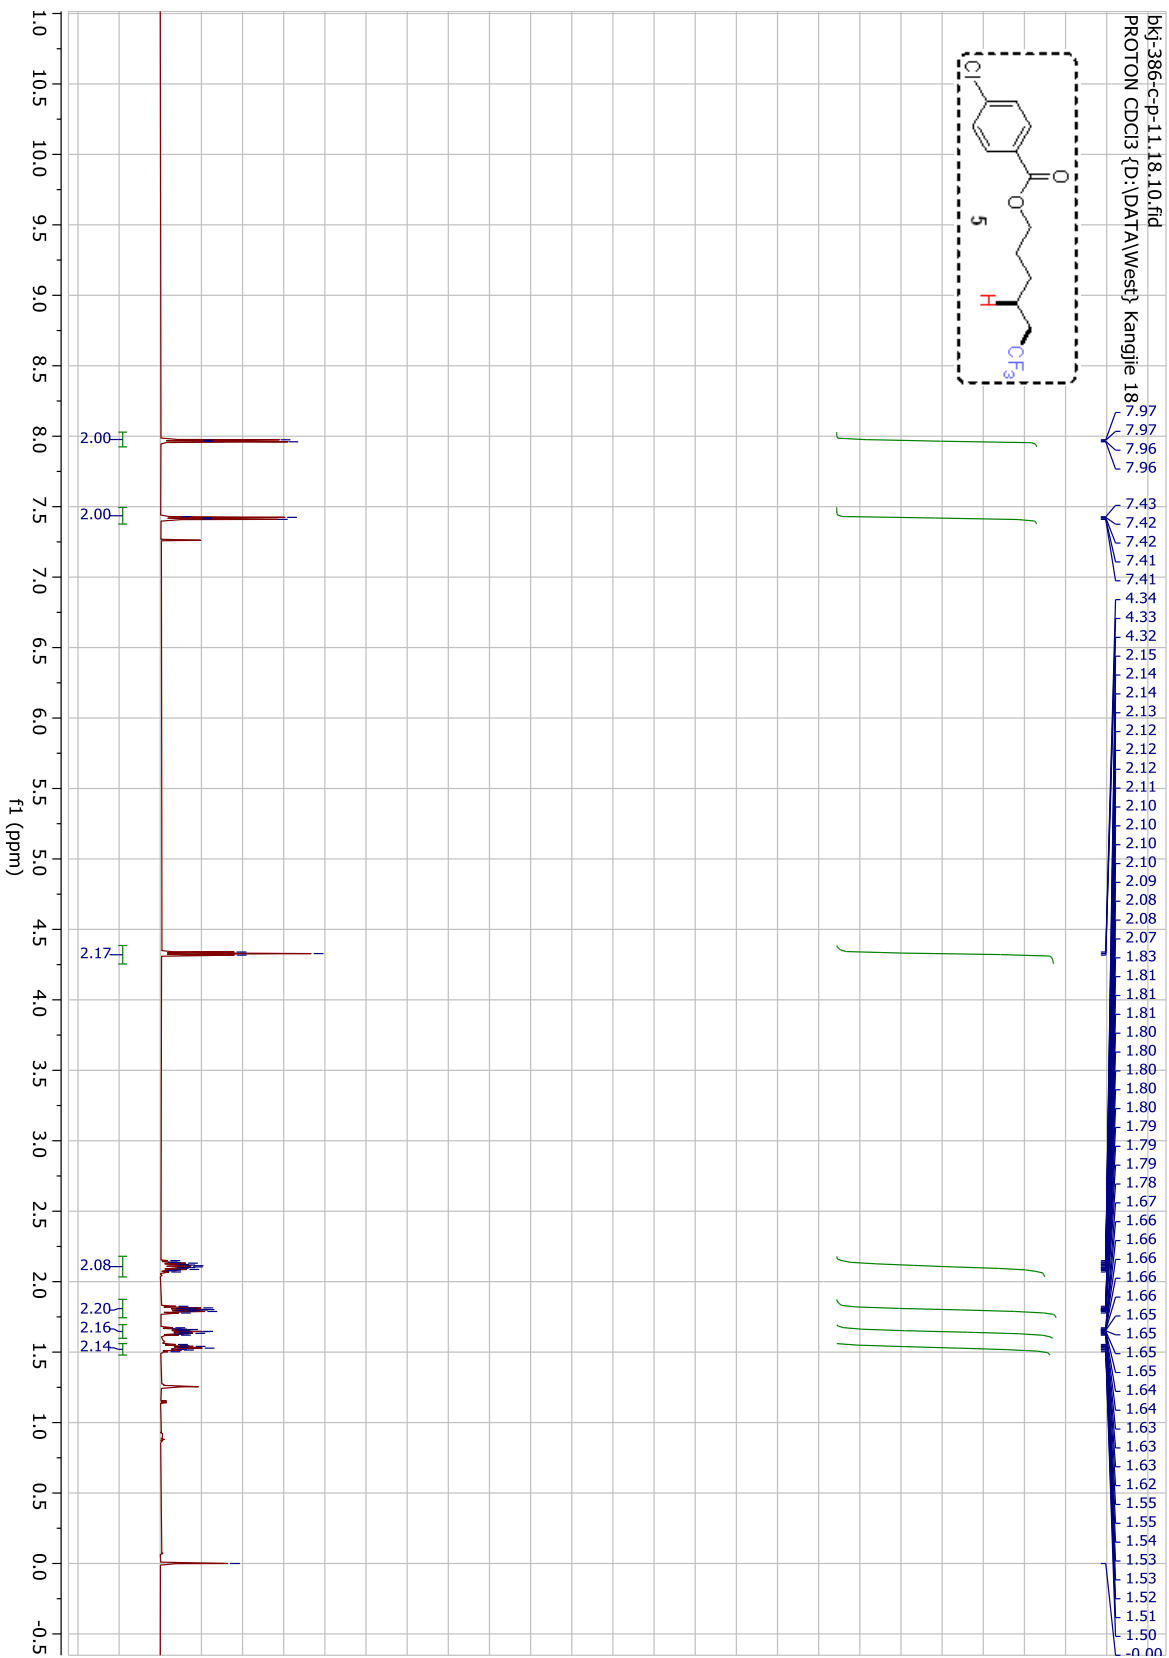



bkj-386-c-p-11:18:11.fid  
C13CPD CDCl3 (D:\DATA\Westj Kangjie\58

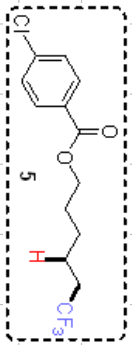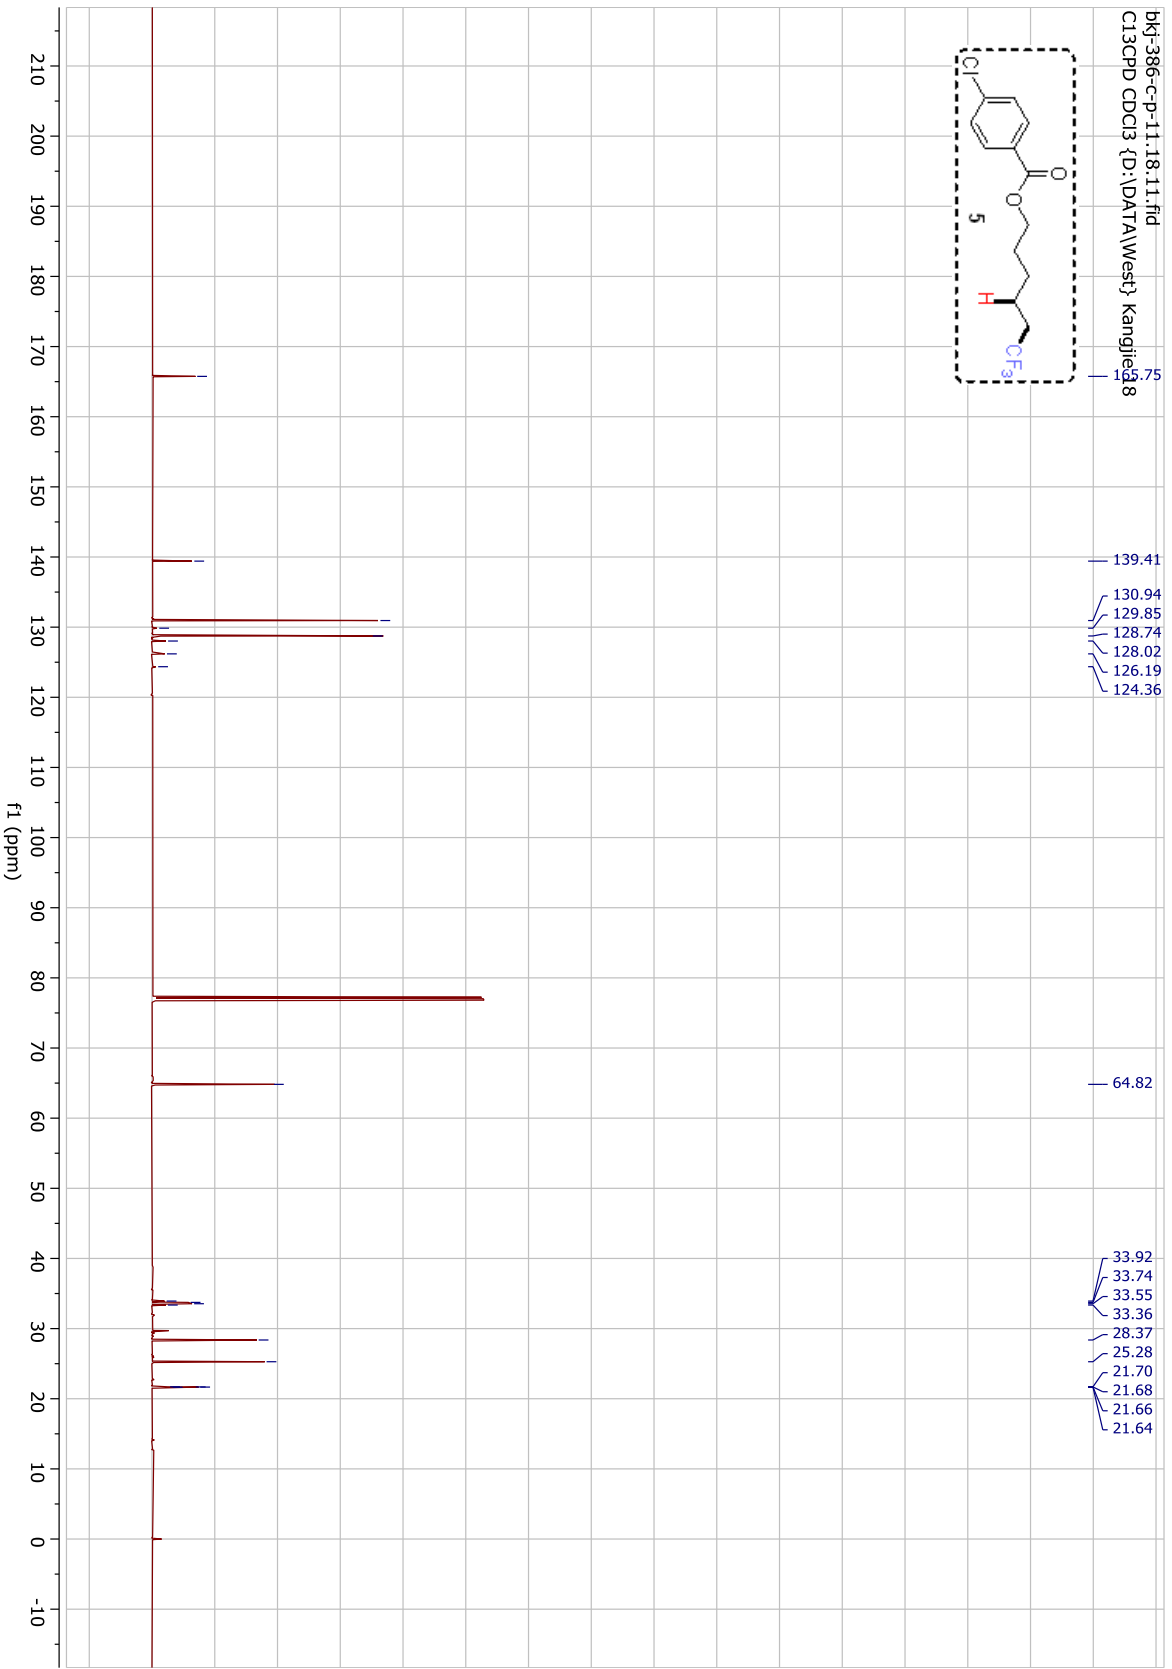

bkj-386-c-p-11.18.12.fid  
F19\_baseline\_correct ID  
F19\_baseline\_correct CDCI3 {D:\DATA\West} Kangjie 18

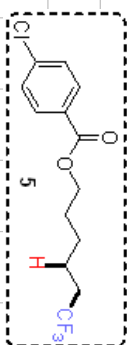

-66.34  
-66.36  
-66.38

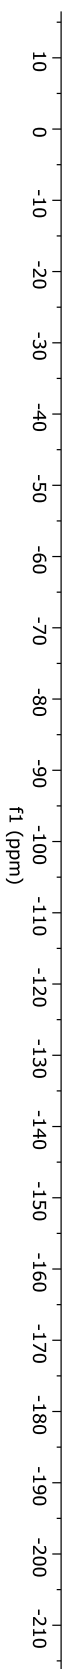

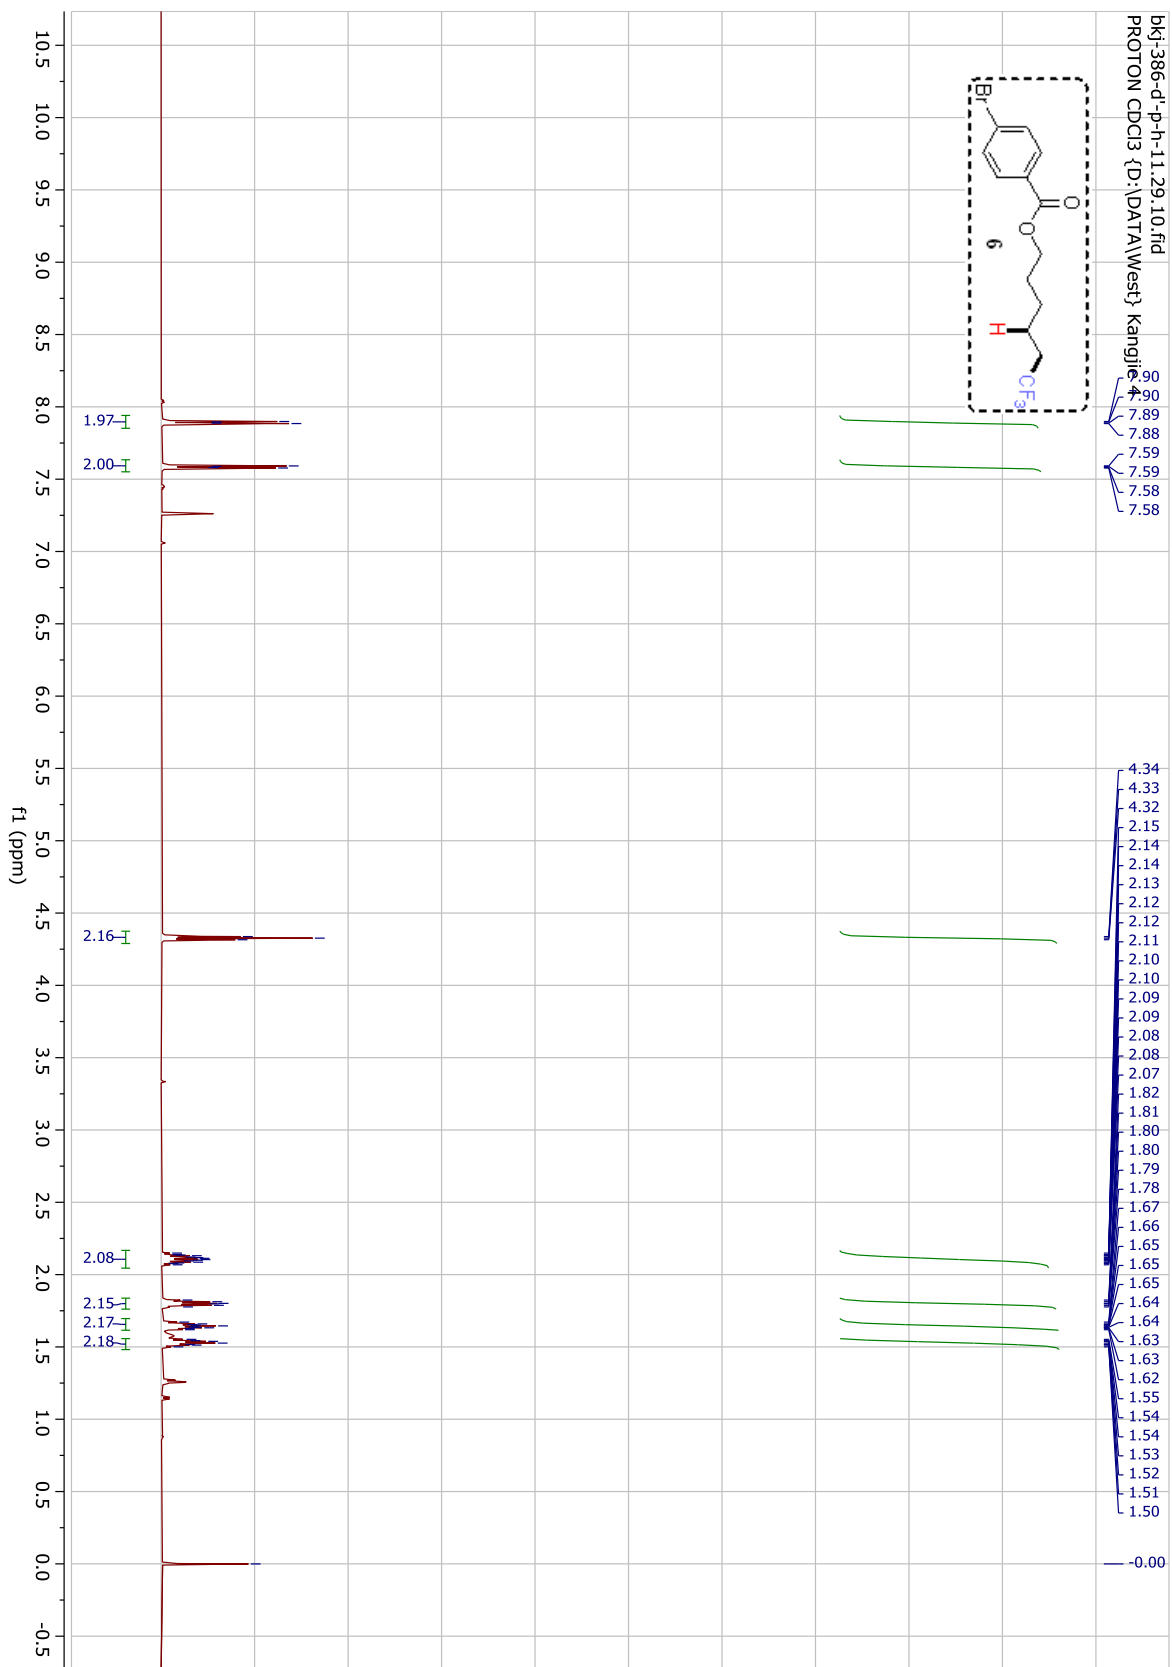

bkj-386-d'-p-c-11-29-11.fid  
C13CPD CDCl3 (D:\DATA\Westj Kangjief)

88

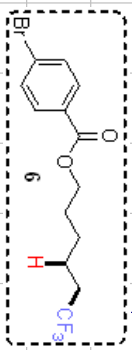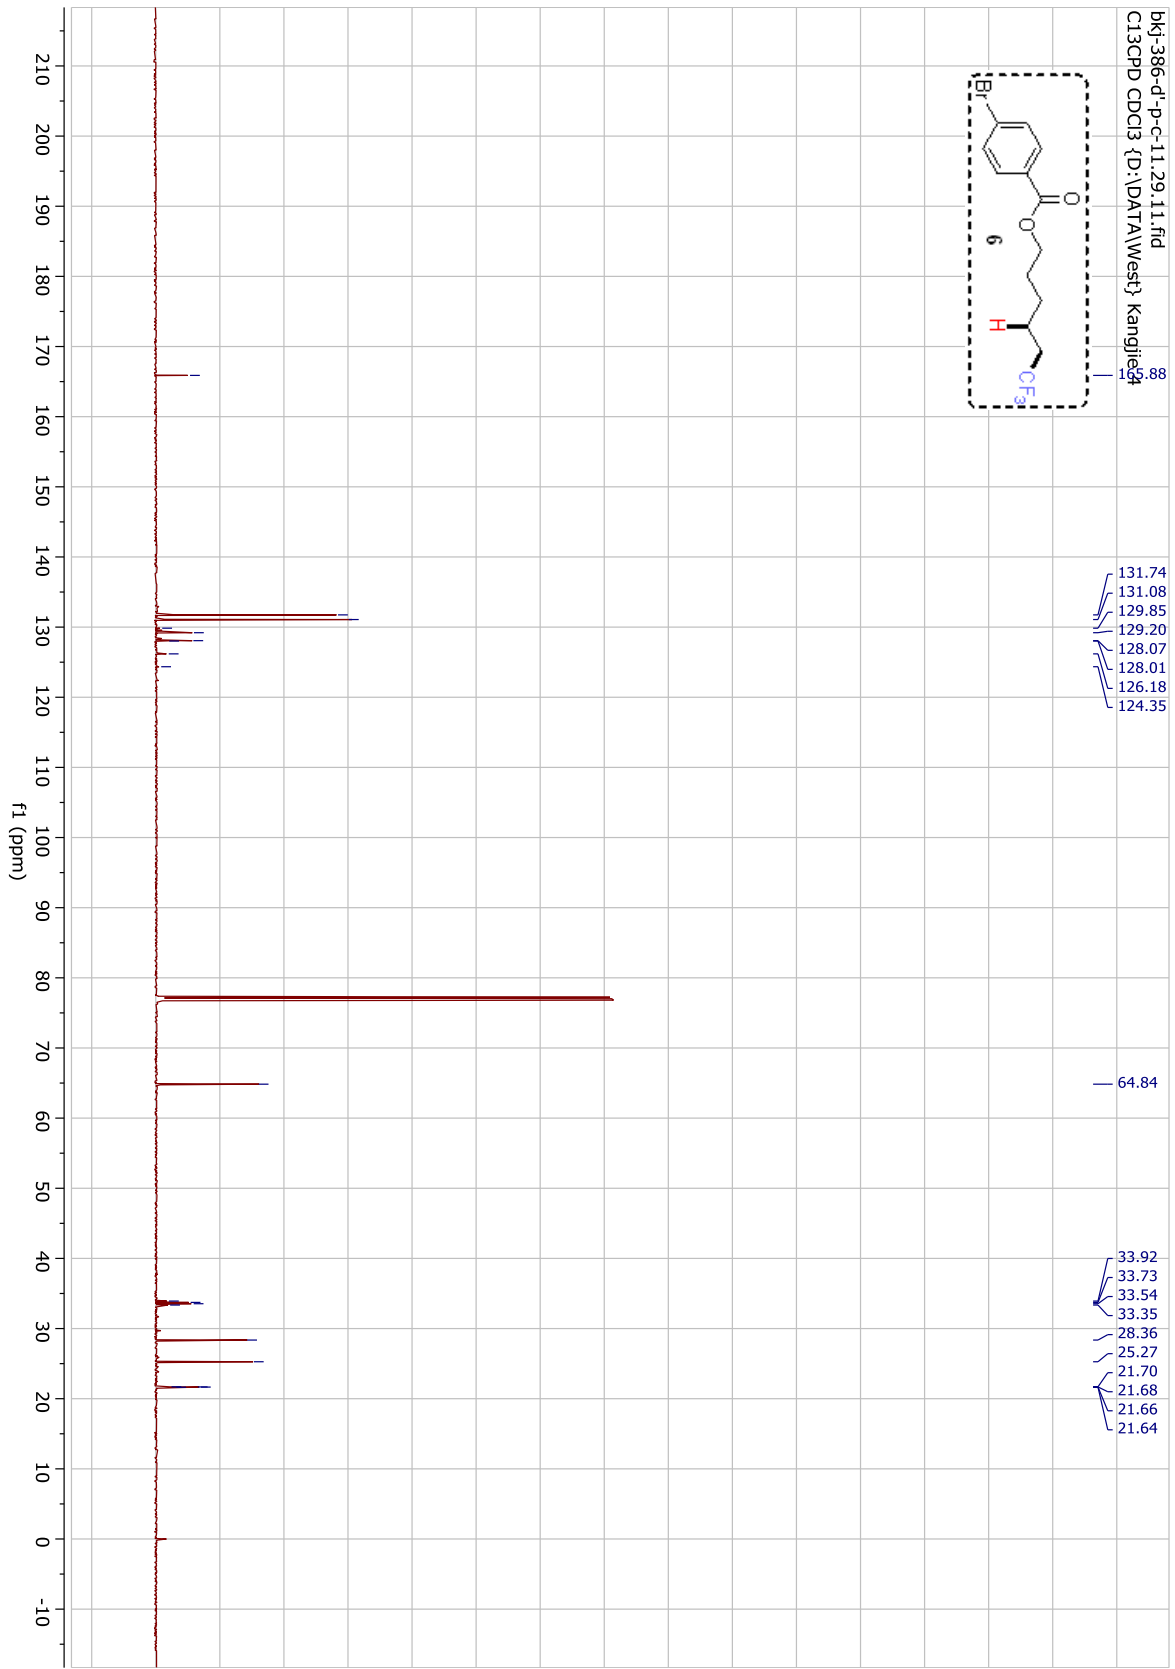

bkj-386-d-p-h-11-29-11.fid  
F19\_baseline\_correct ID  
F19\_baseline\_correct CDCl3 {D:\DATA\West} Kangjie 4

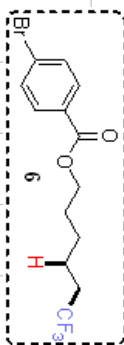

-66.34  
-66.36  
-66.38



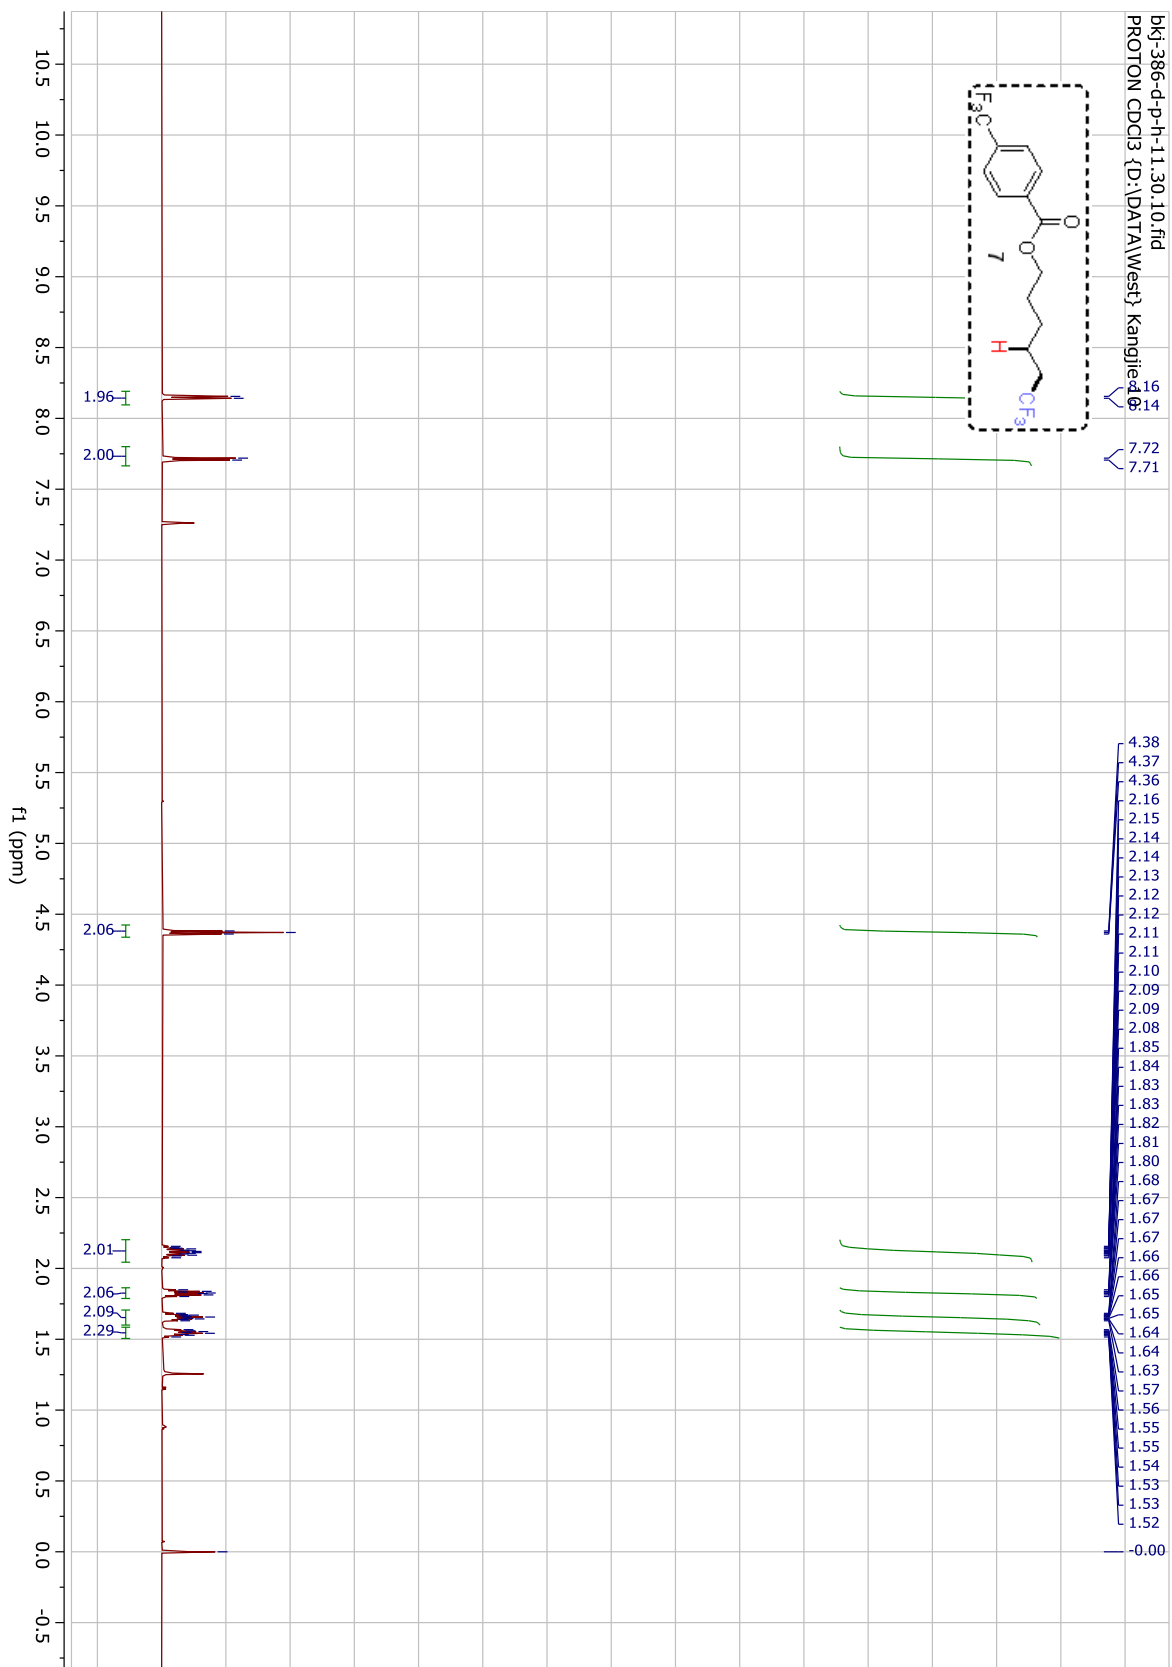

bjf-386-d-p-h-11.30.11.ftd  
C13CPD CDCl3 (D:\DATA\Westy\Kangjie\90

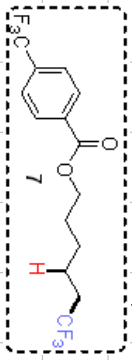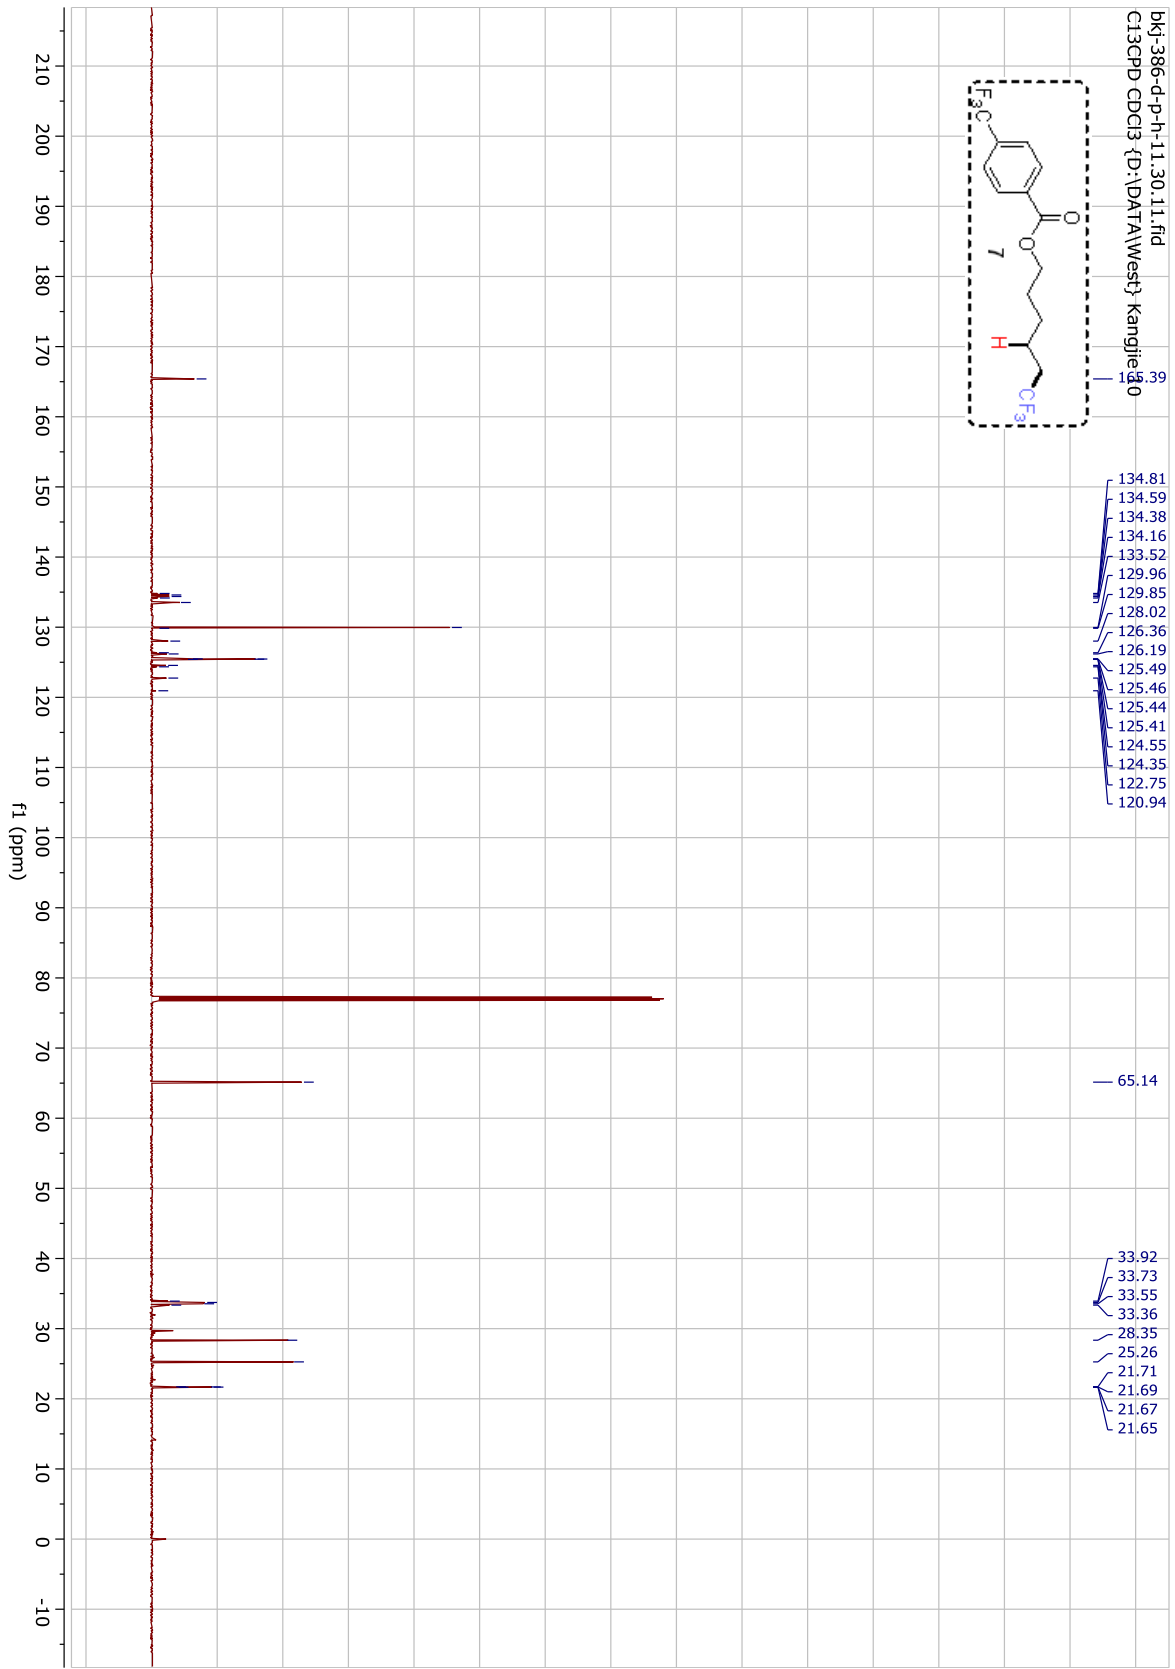

bkj-386-d-p-h-11.30.12.fid

F19\_baseline\_correct 1D

F19\_baseline\_correct CDCl3 {D:\DATA\West\ Kangjie 10

63.13  
66.35  
66.37  
66.37  
66.39  
66.39

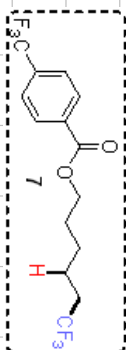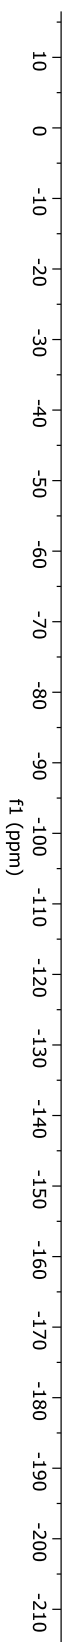



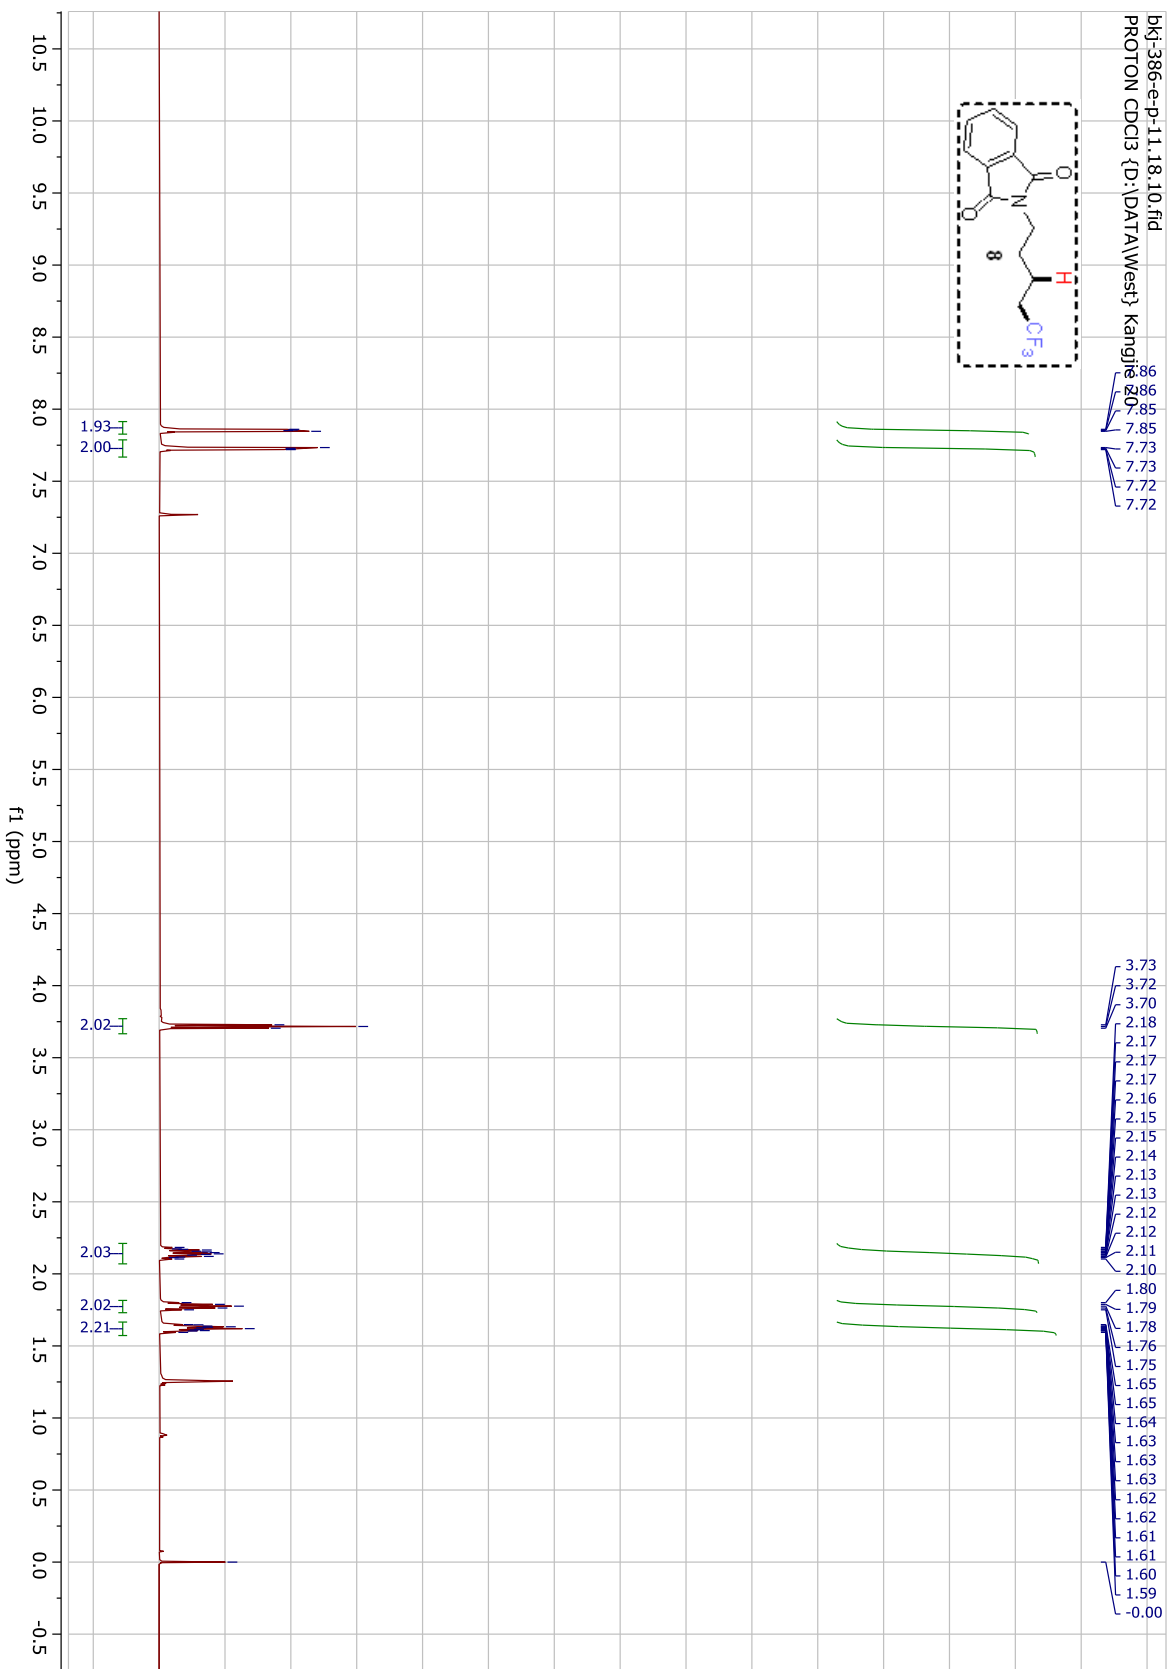

bjl-386-e-p-11-18-11.fid  
C13CPD CDCl3 (D:\DATA\Westj Kang) 20

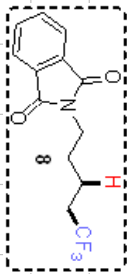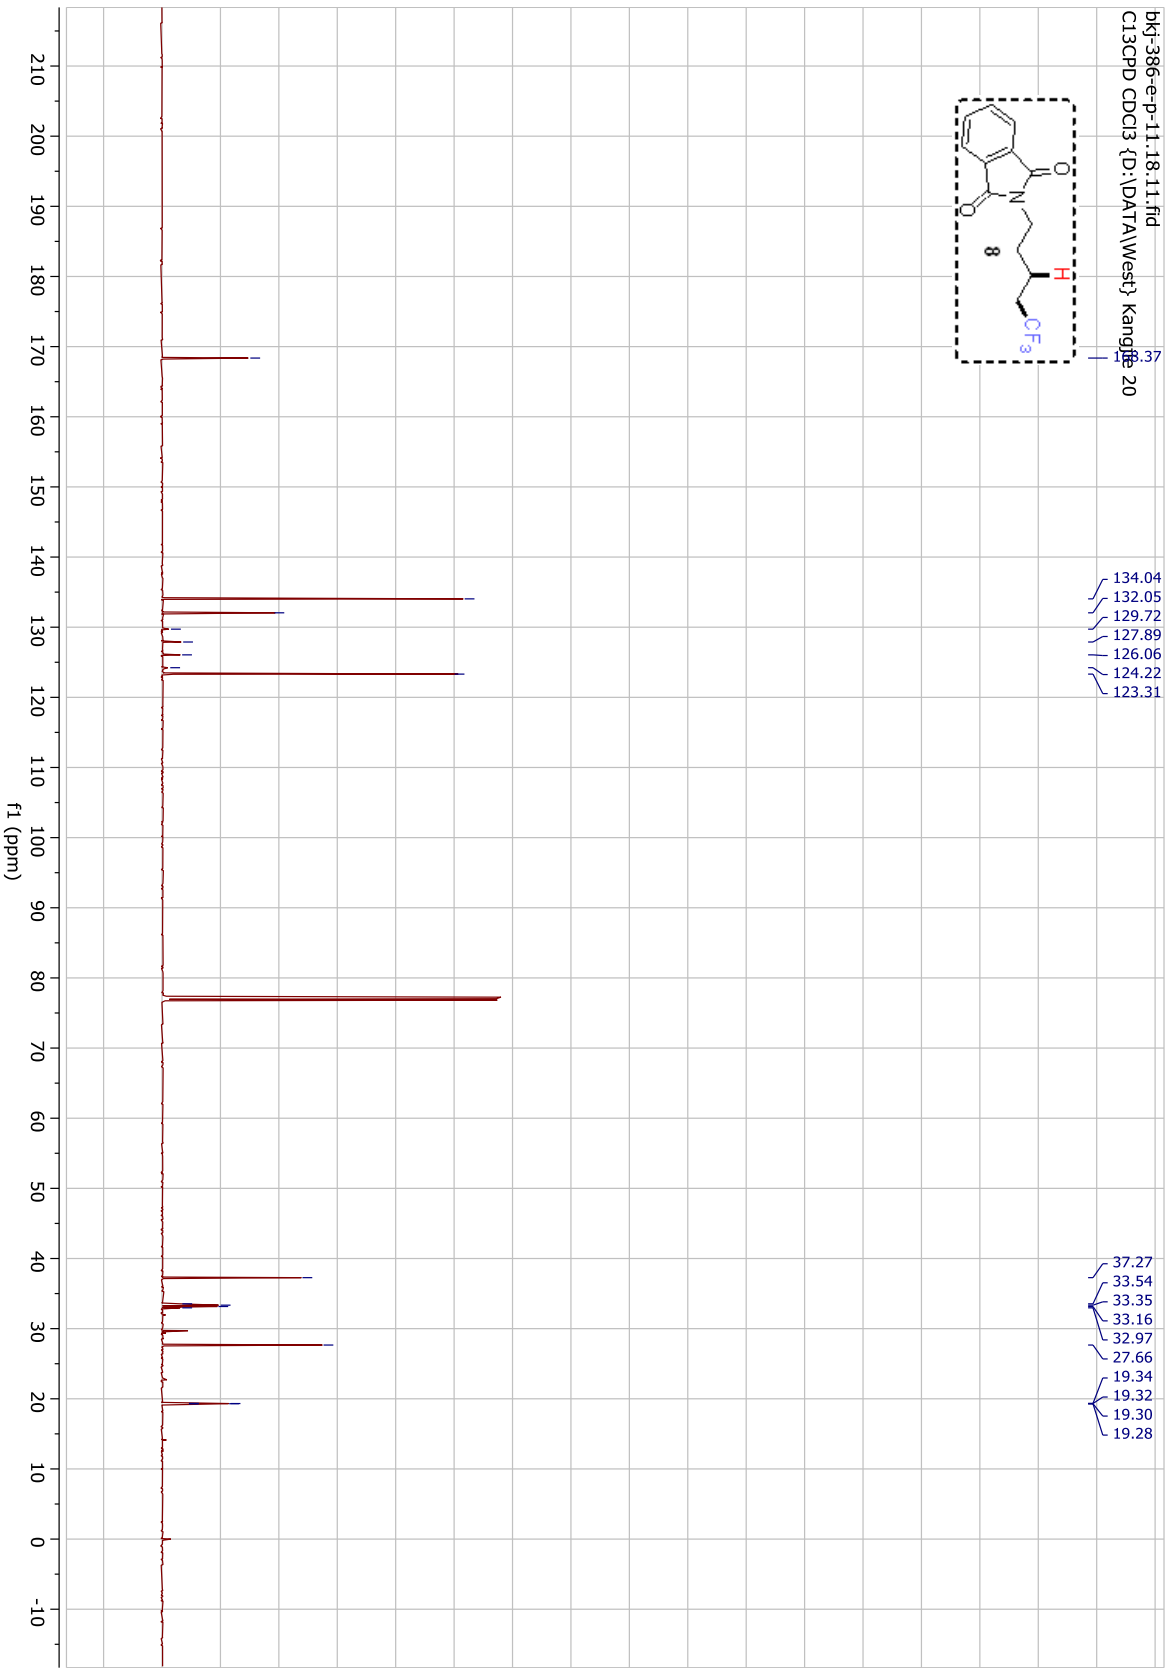

bkj-386-e-p-11.18.12.fid  
F19\_baseline\_correct 1D  
F19\_baseline\_correct CDCl3 {D:\DATA\West} Kangjie 20

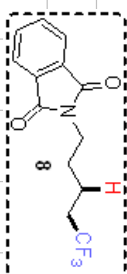

-66.33  
-66.35  
-66.37



bk1-386-h-p-11.18.10.fid  
PROTON CDCl3 {D:\DATAWest\Kanglie 21

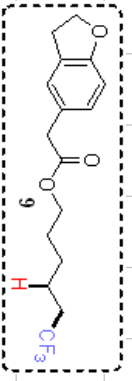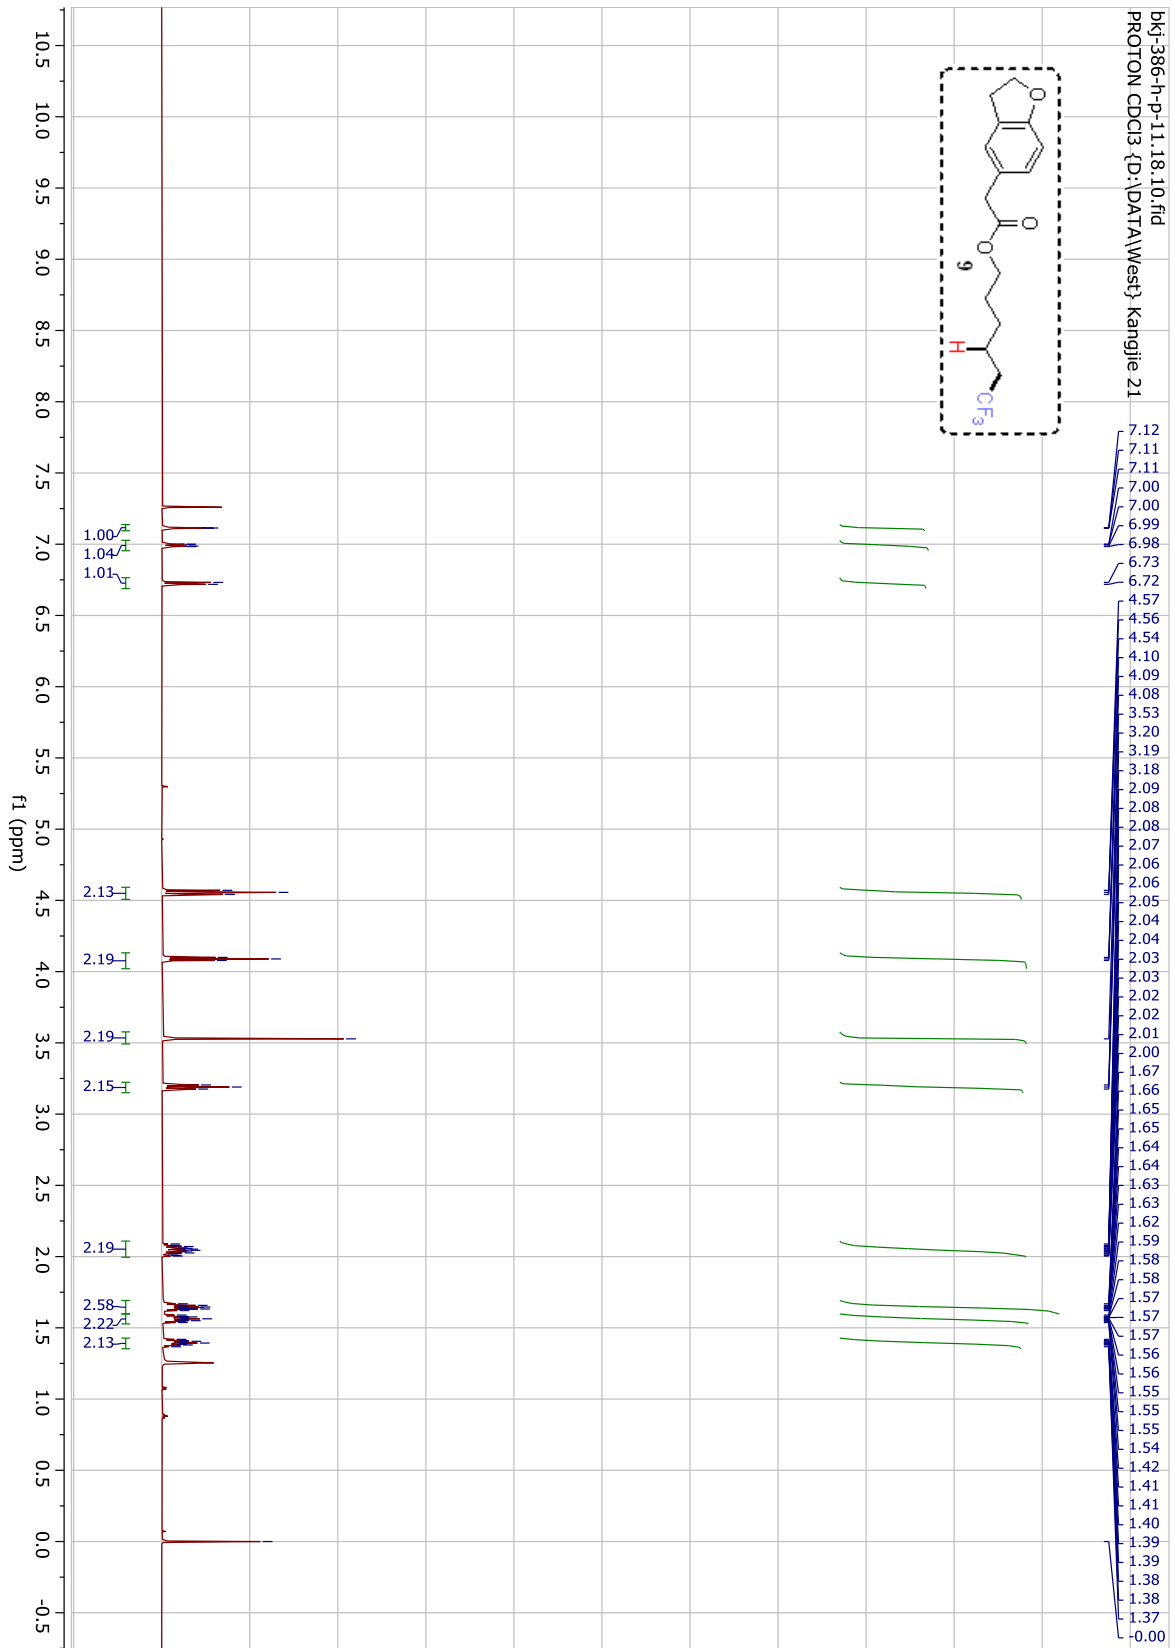

bkj-386-h-p-11.18.11.fid  
C13CPD CDCl3 (D:\DATA\Westj\_kapjije 21

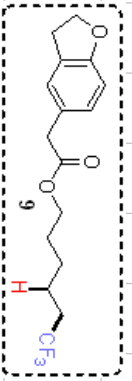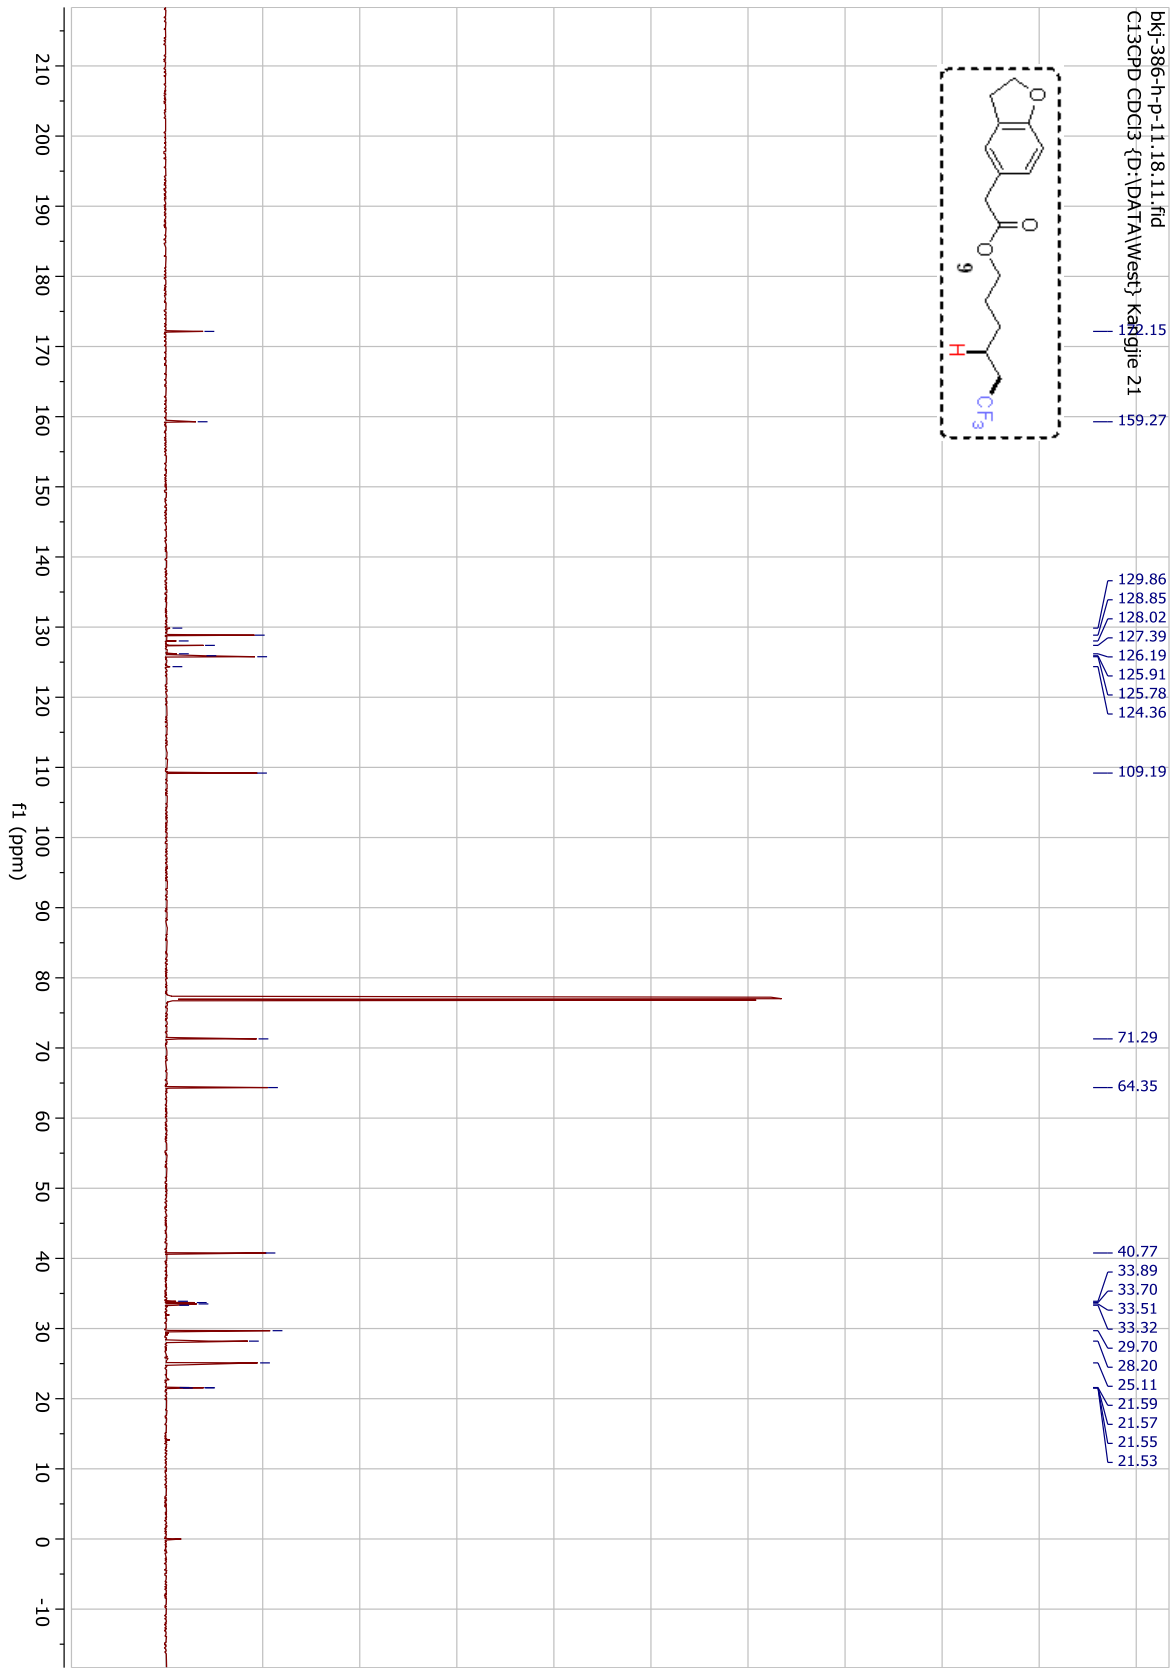

bkj-386-h-p-11.18.12.fid  
F19\_baseline\_correct 1D  
F19\_baseline\_correct CDCl3 {D:\DATA\West}\Kangjie 21

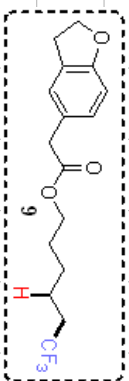

-66.34  
-66.36  
-66.38



bk1-386-k-p-11.20.10.fid  
PROTON CDCl3 {D:\DATA\West\} Kangjie 6

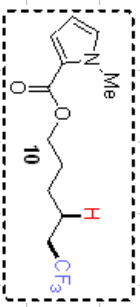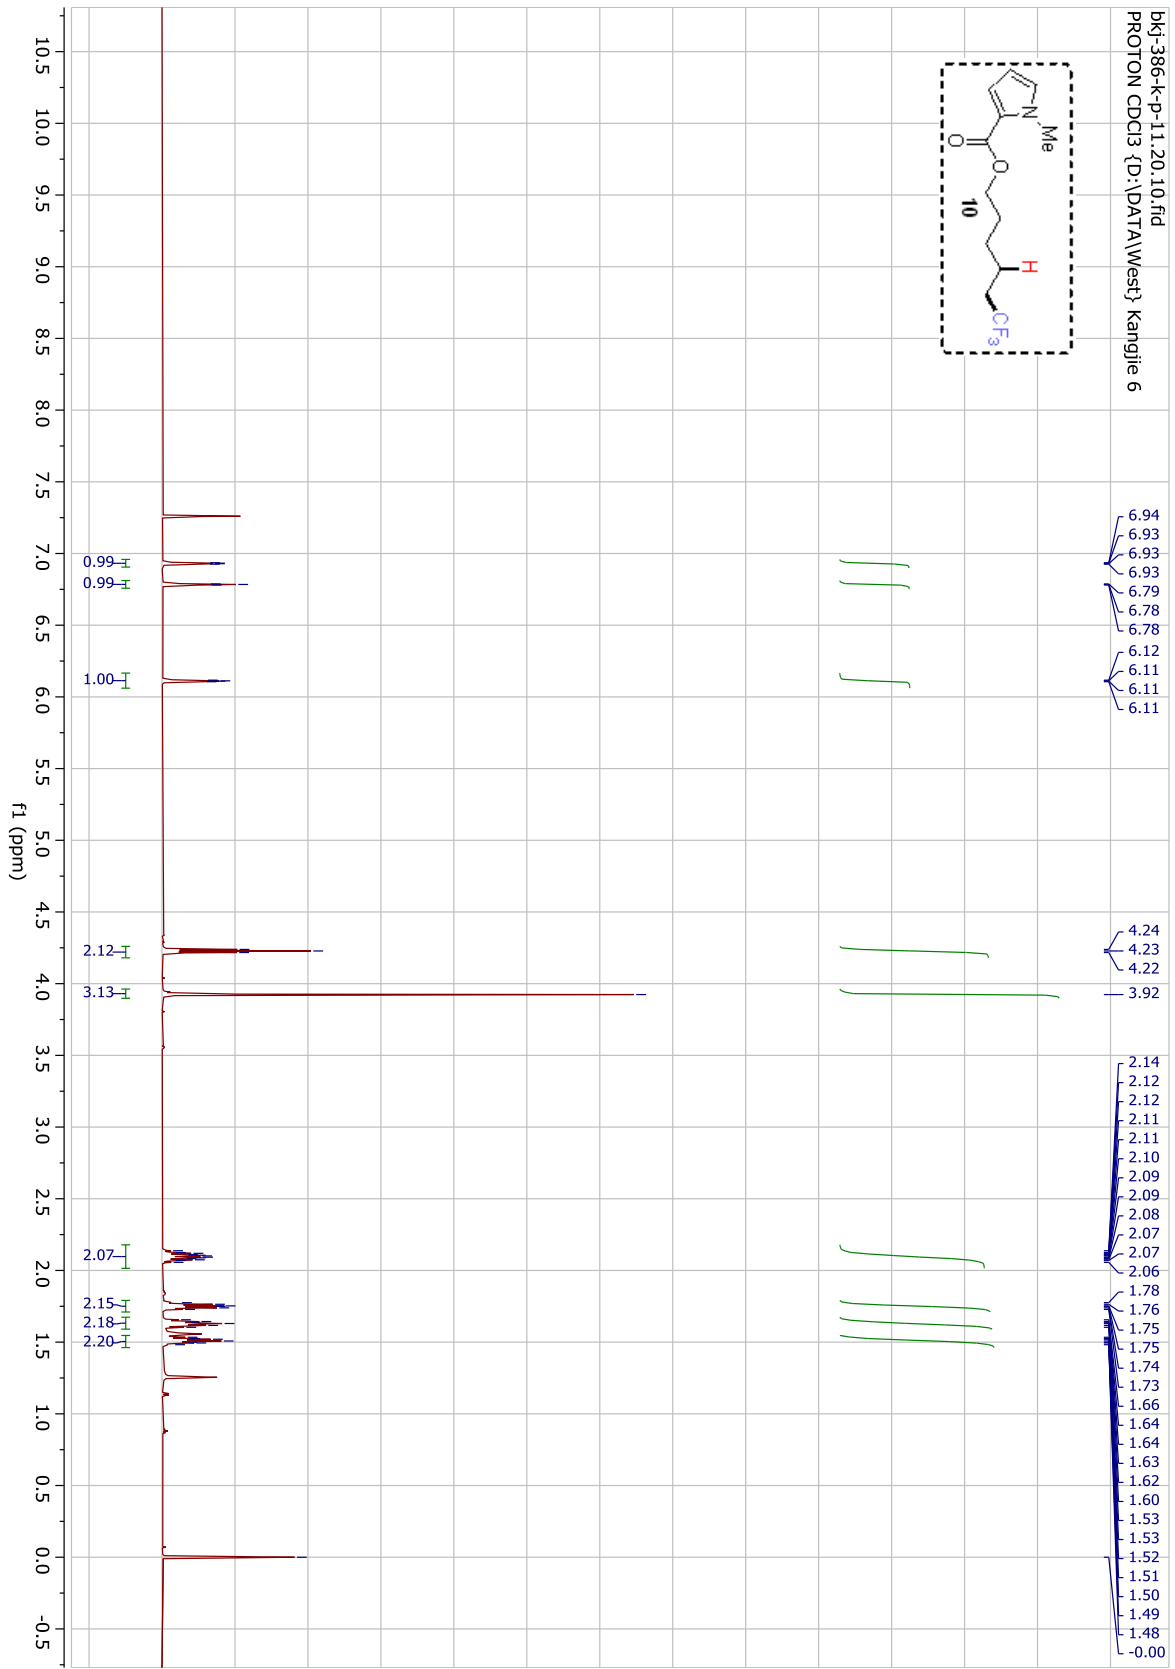





bkj-386-k-p-11.20.12.fid  
F19\_baseline\_correct ID  
F19\_baseline\_correct CDCI3 {D:\DATA\West} Kangjie 6

-66.36  
-66.38  
-66.39

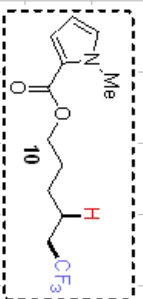

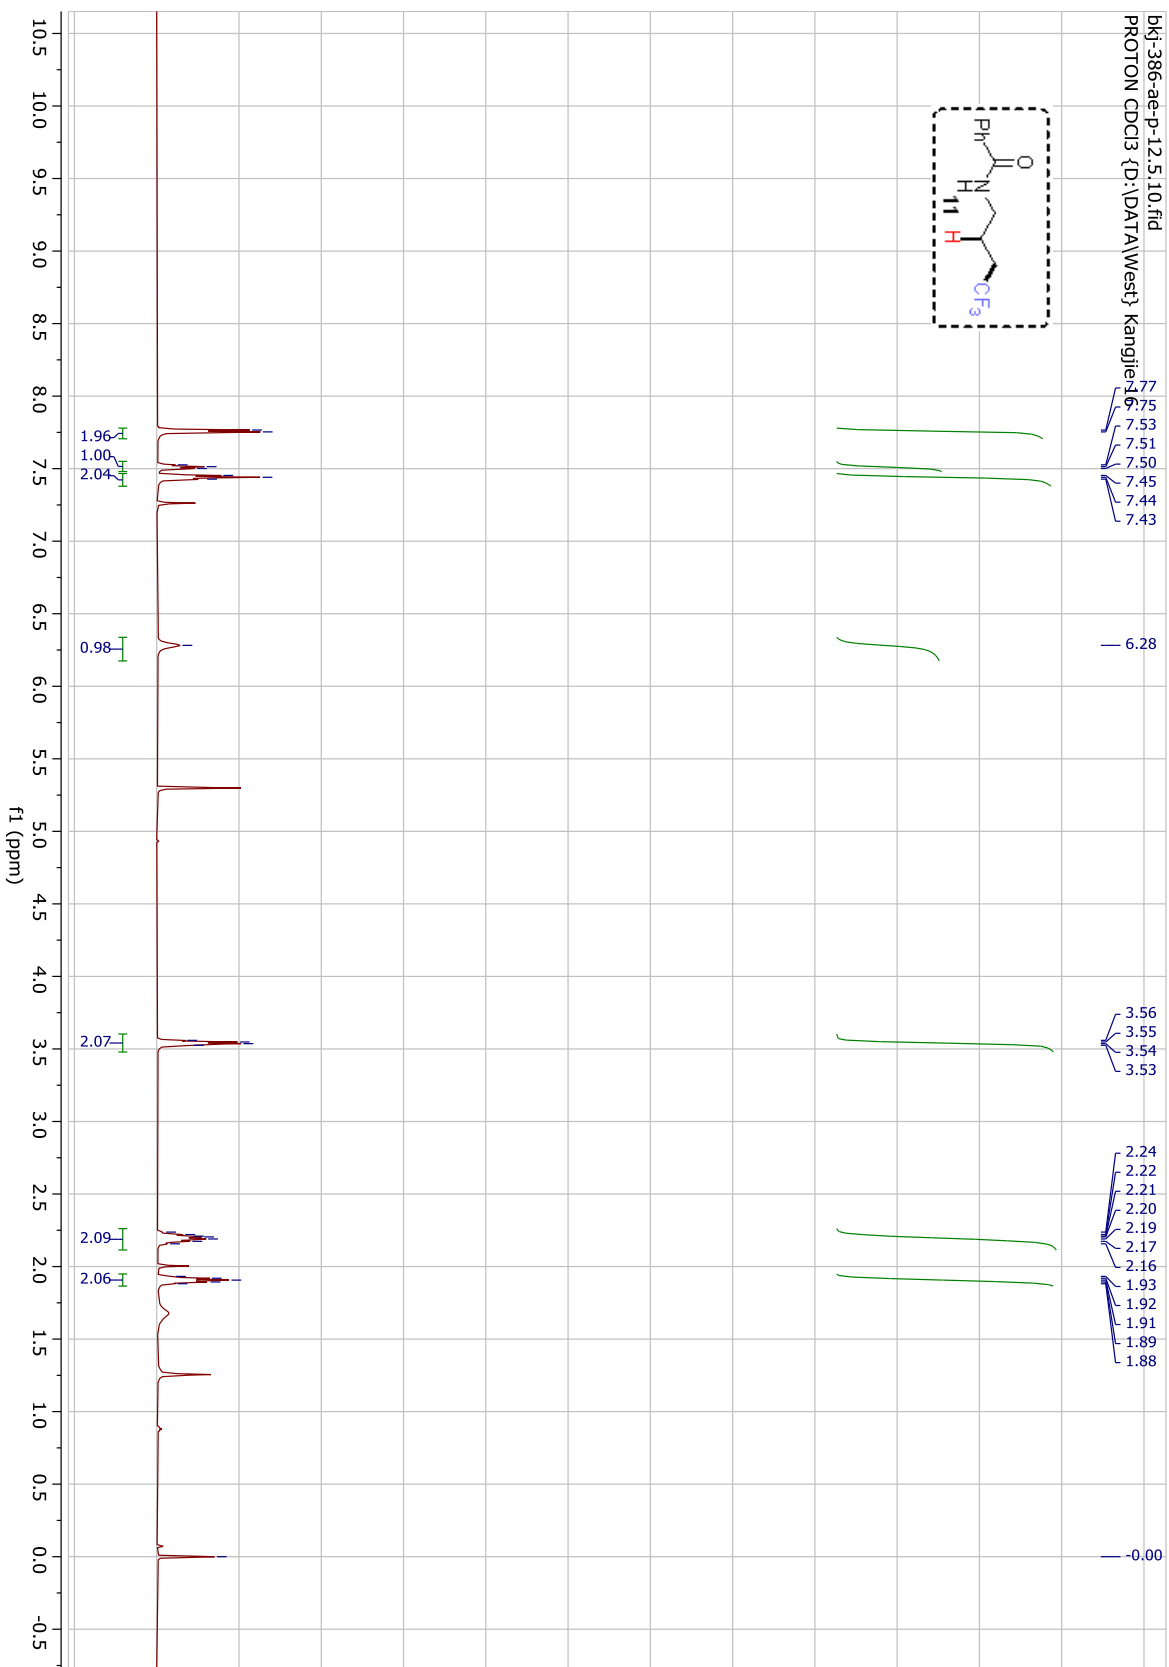

bkj-386-ae-p-12.5.12.fid  
C13CPD CDCl3 (D:\DATA\Westj Kangji)  
16

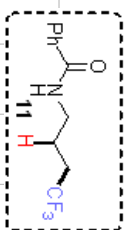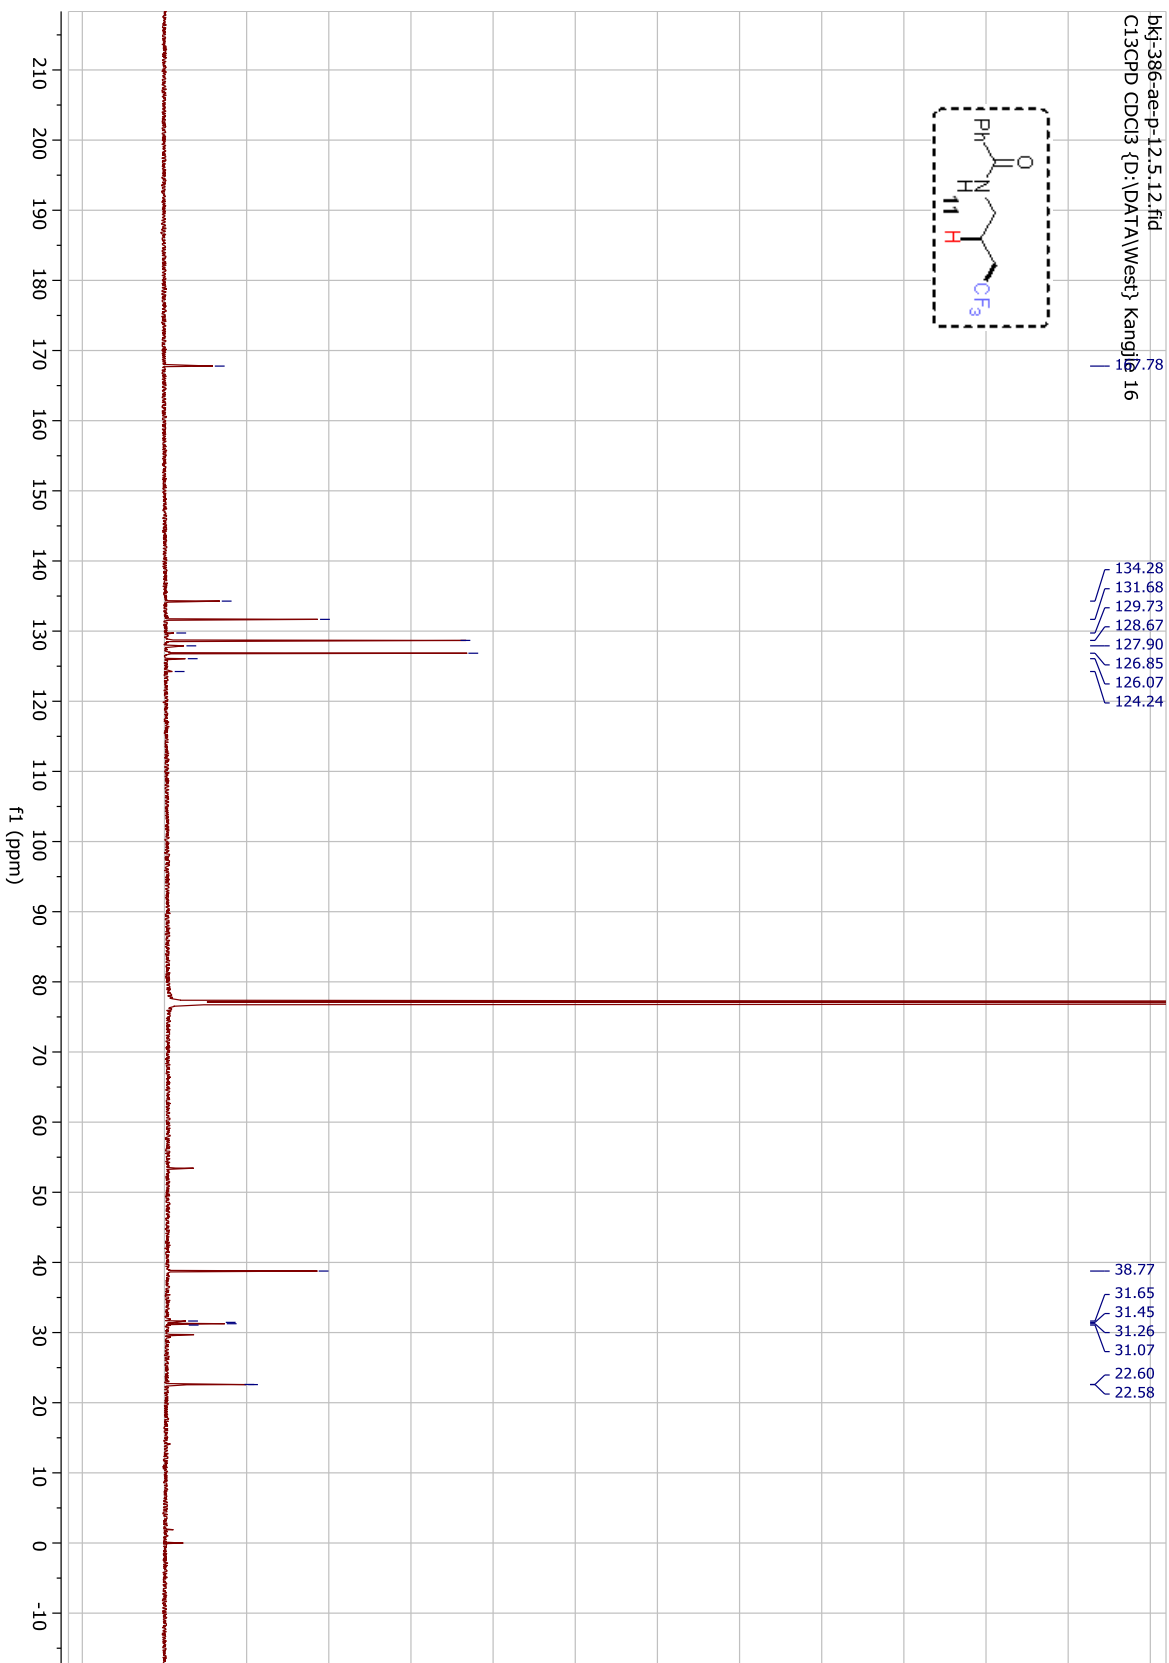

bkj-386-ae-p-12.5.11.fid  
F19\_baseline\_correct ID  
F19\_baseline\_correct CDC13 {D:\DATA\West} Kangjie 16

-66.11  
-66.13  
-66.15

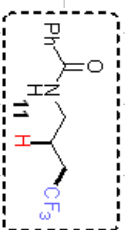

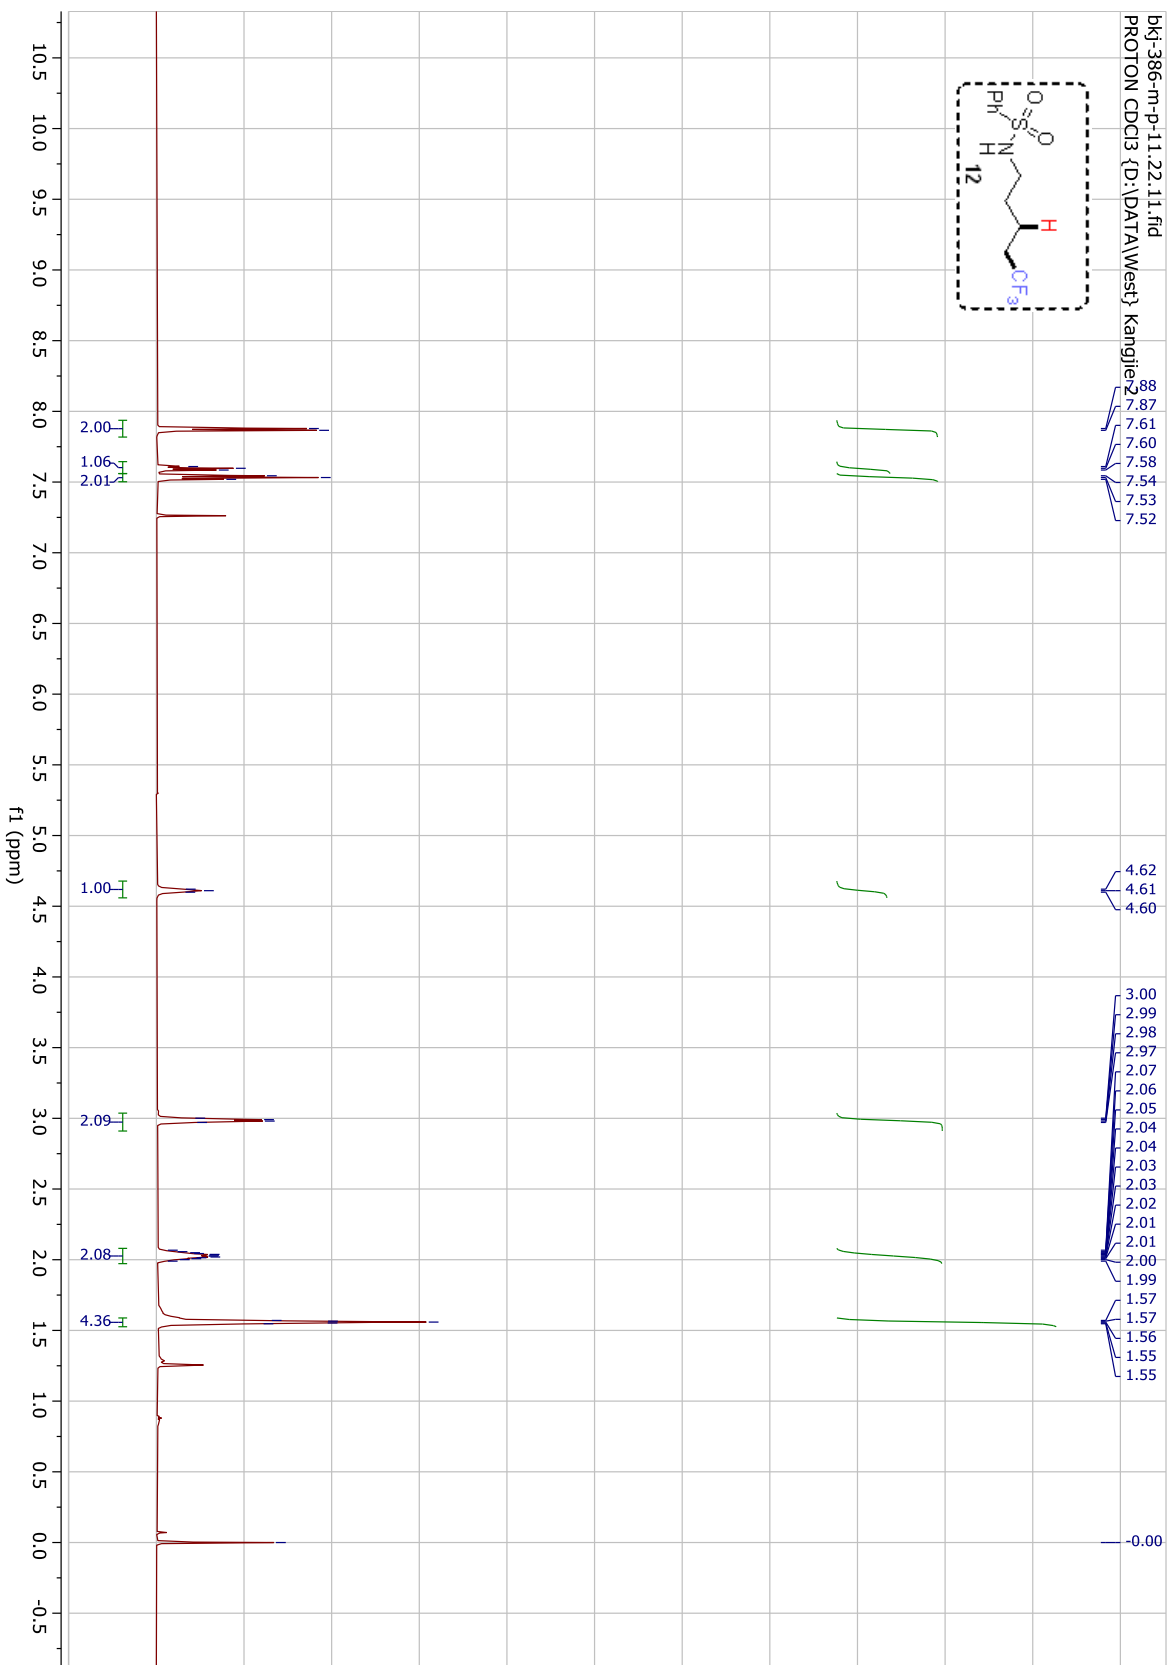

bjf-386-m-p-11-22.10.fid  
C13CPD CDCl3 (D:\DATA\Westj Kangjie 2

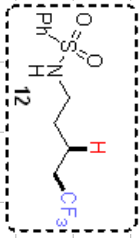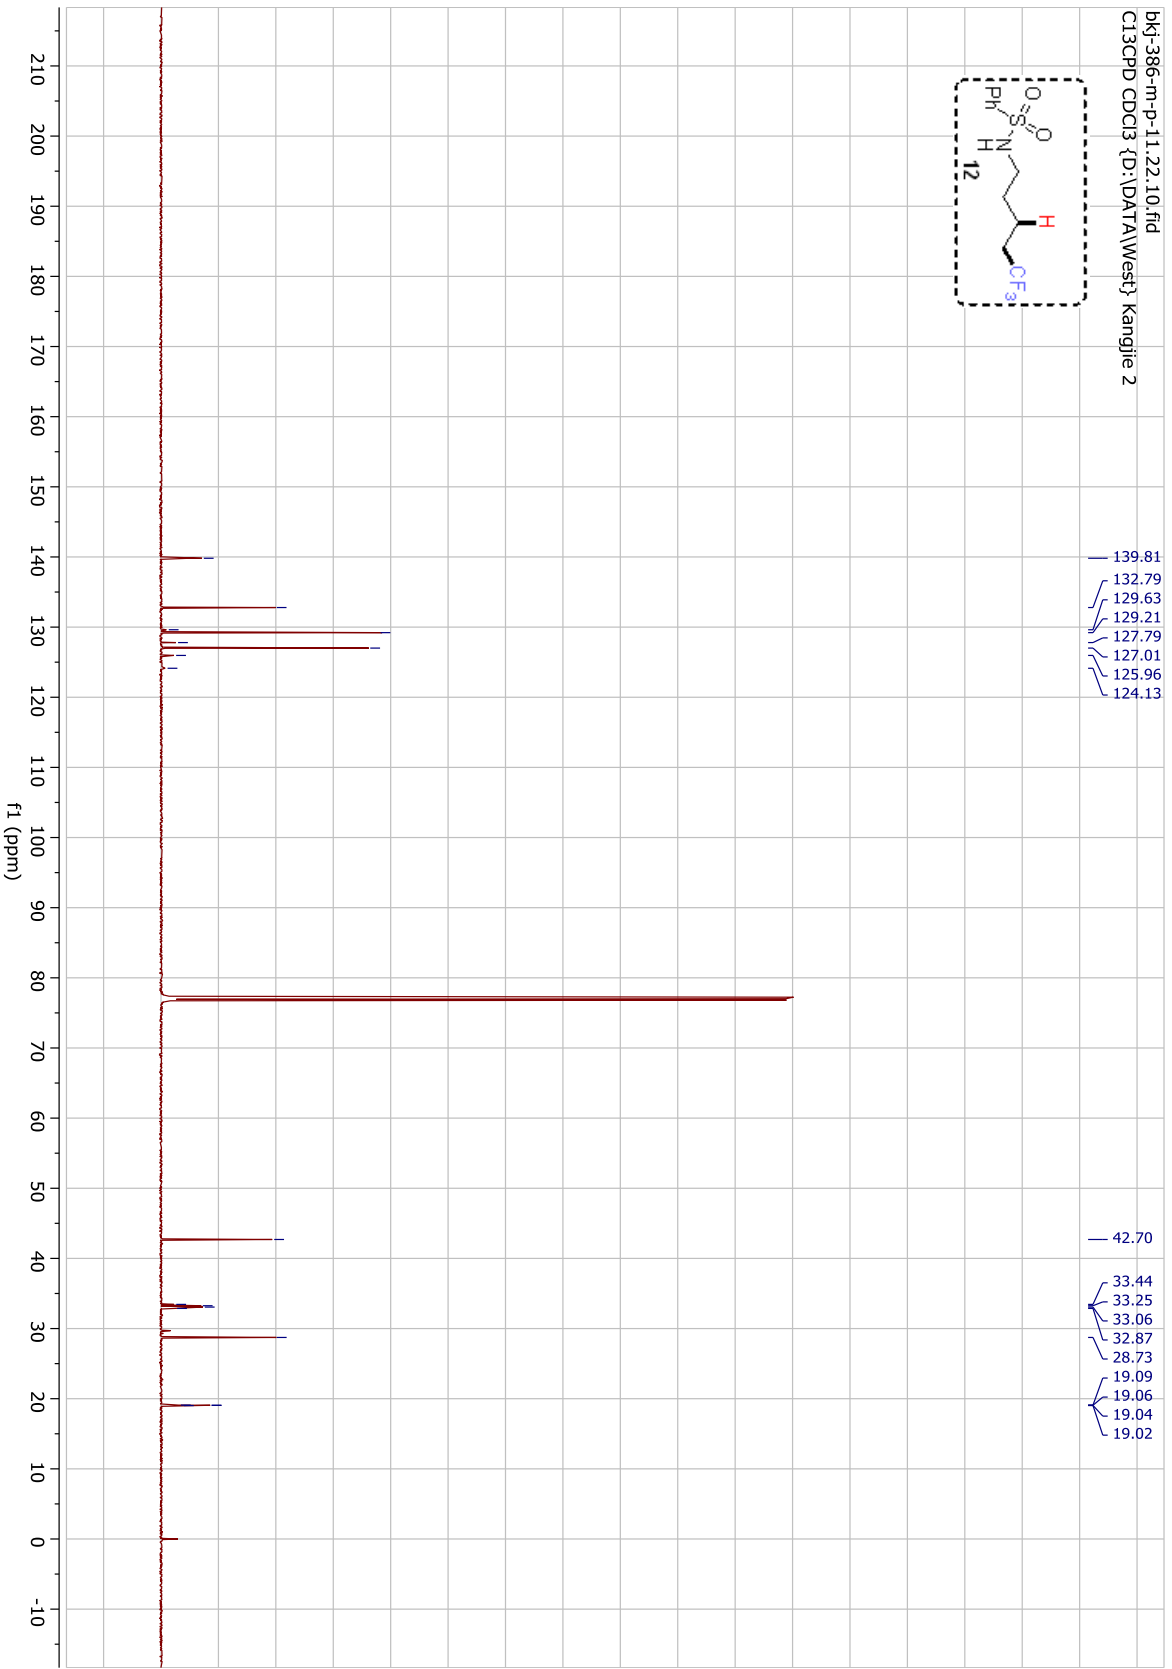

bkj-386-m-p-11.22.12.fid  
F19\_baseline\_correct 1D  
F19\_baseline\_correct CDC13 {D:\DATA\West} Kangjie 2

-66.32  
-66.34  
-66.36

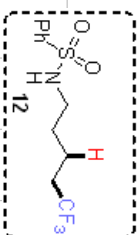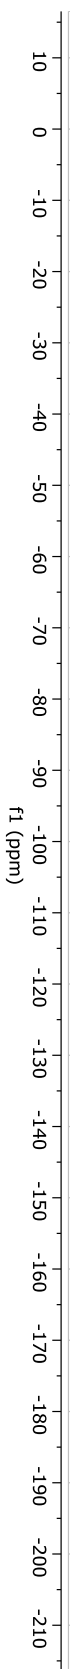

bkl-386-az-p-h-1.22.10.fid  
PROTON CDCl3 {D:\DATA\West\ Kangjie 4

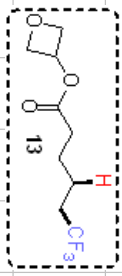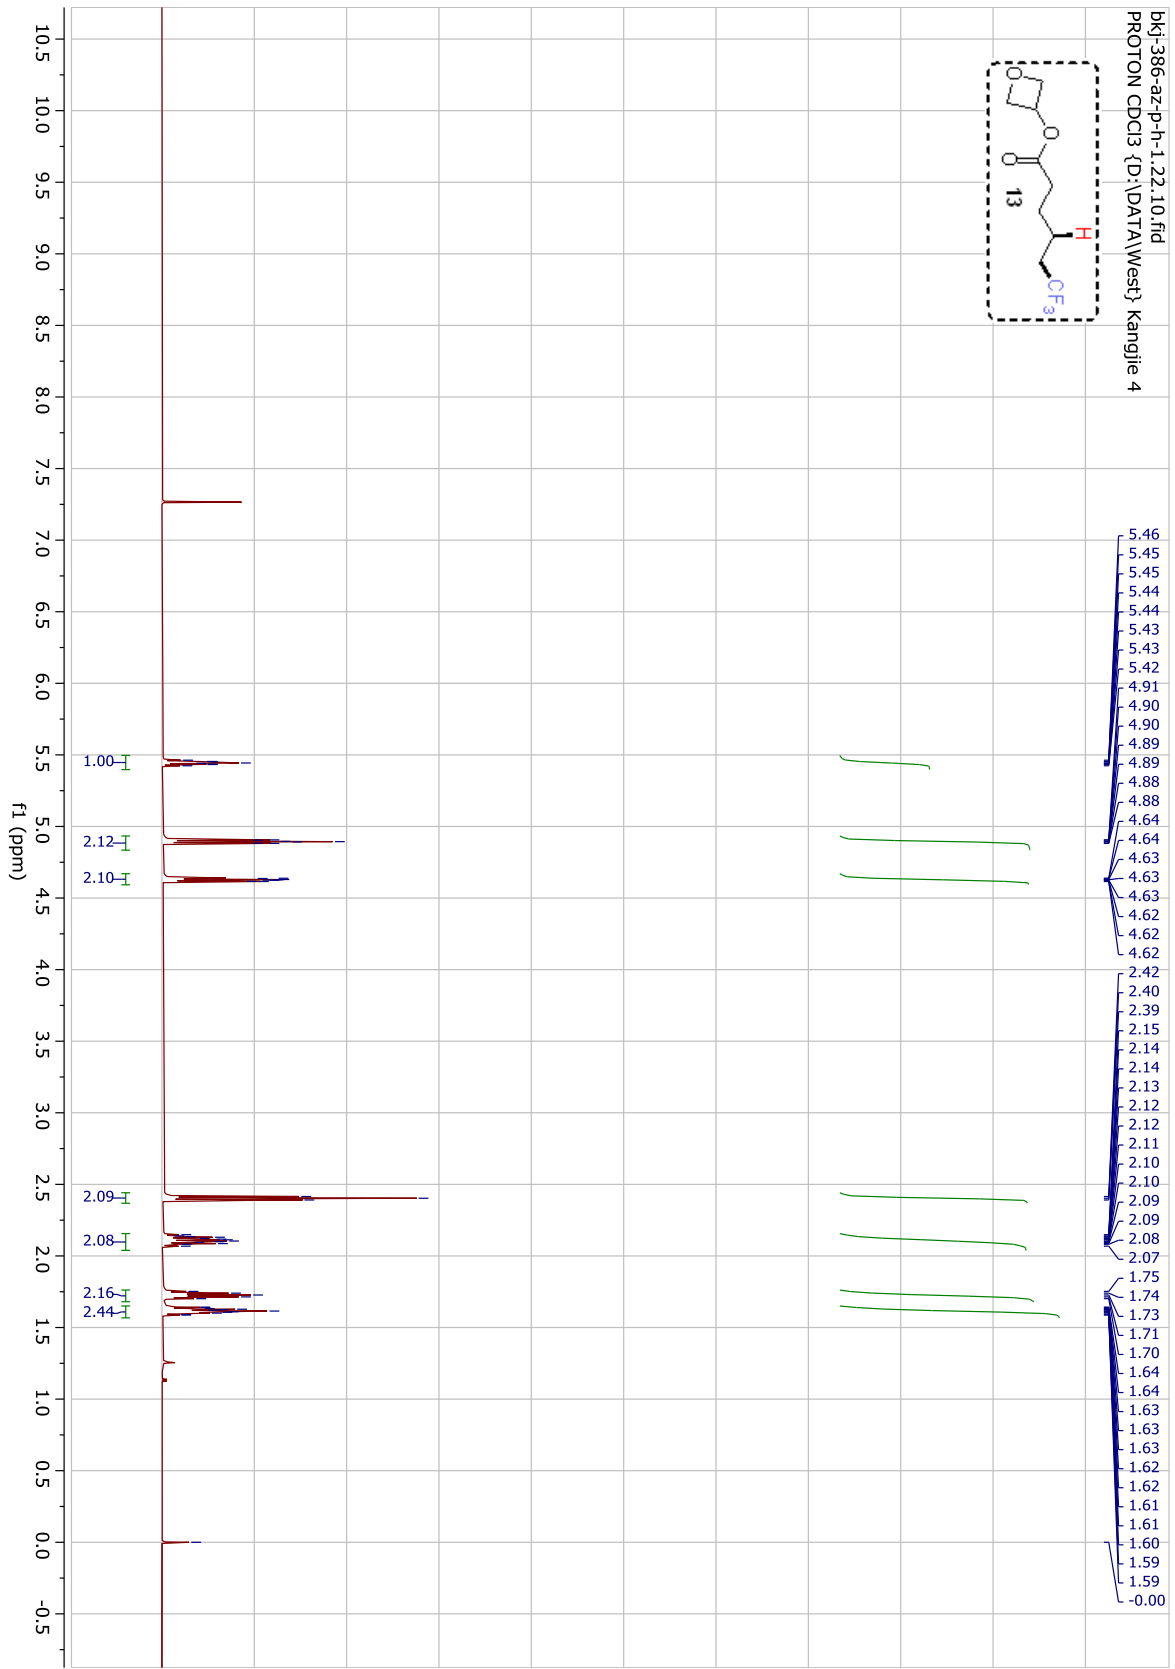



bkj-386-az-p-c-1.23.10.fid  
C13CPD CDCl3 (D:\DATA\Westj) Kapjele 18

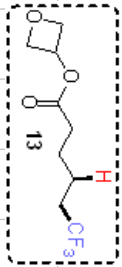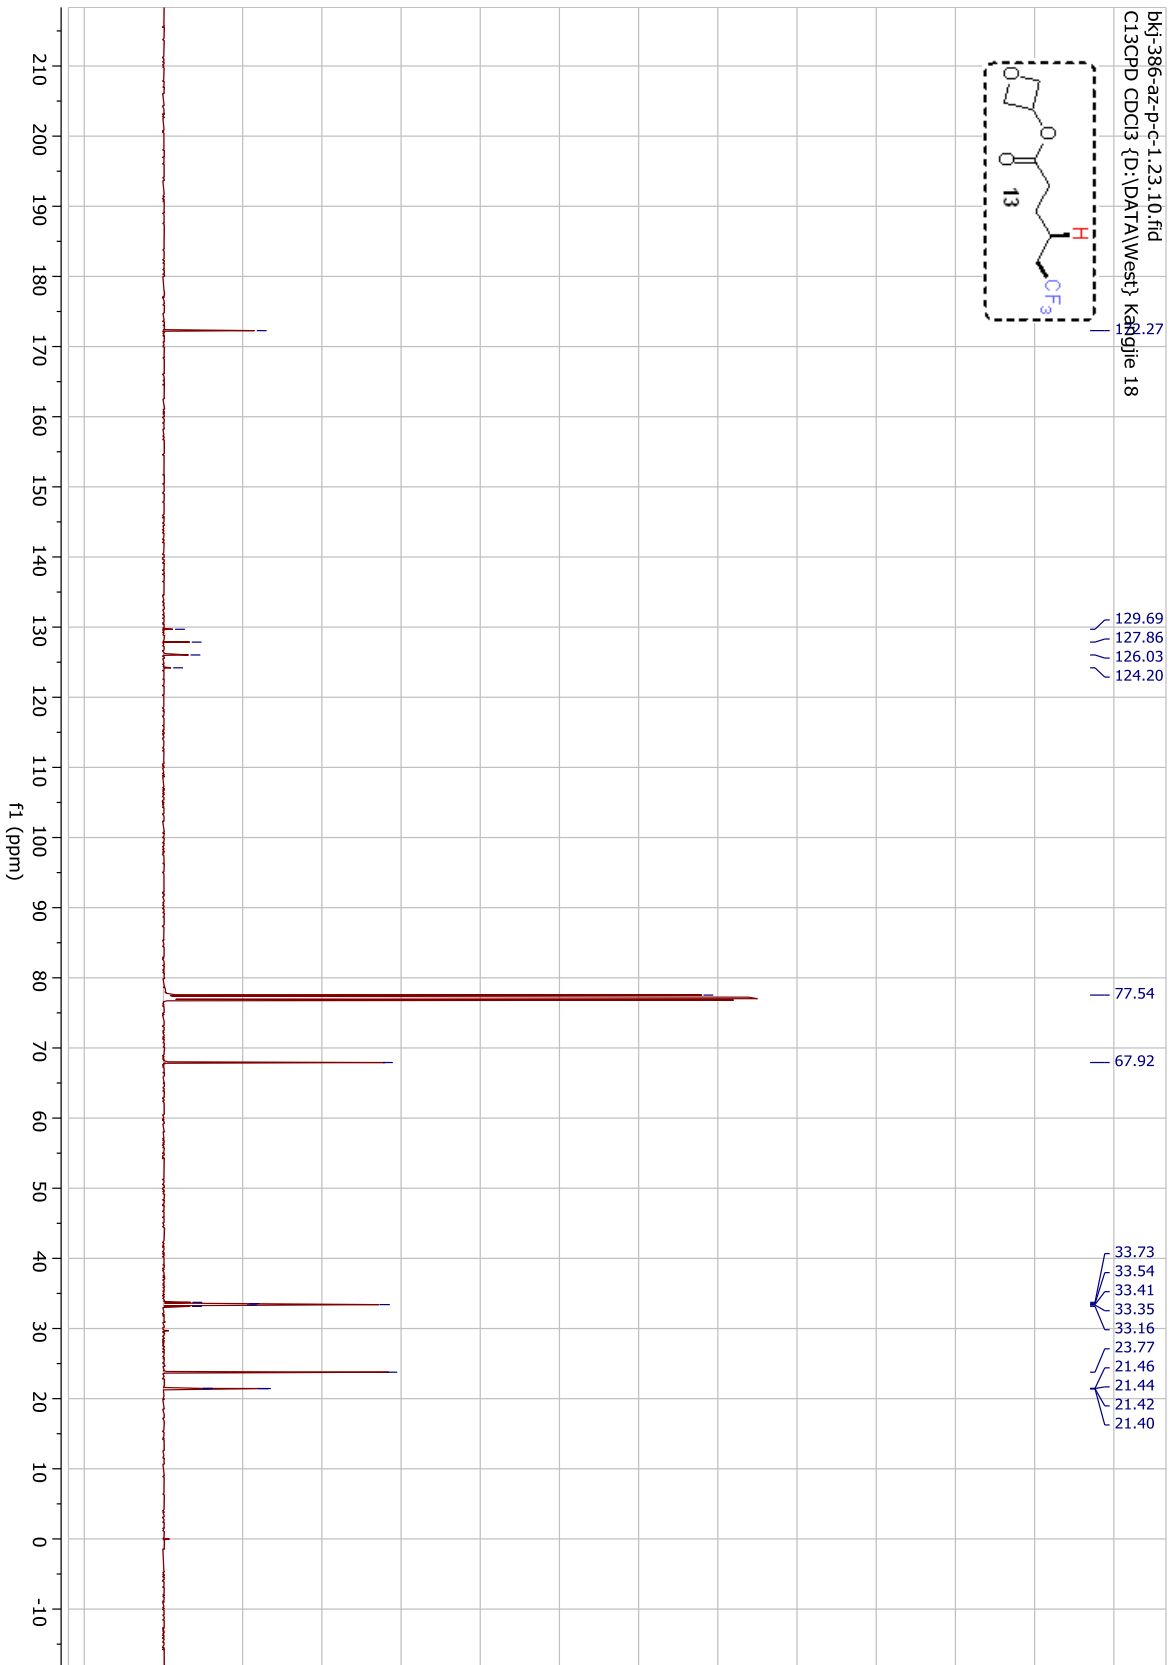

bkj-386-az-p-h-1.22.11.fid  
F19\_baseline\_correct\_ID  
F19\_baseline\_correct\_CDCl3 {D:\DATA\West\ Kangjie 4

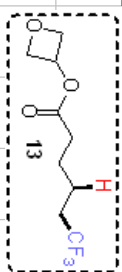

66.35  
66.37  
66.39

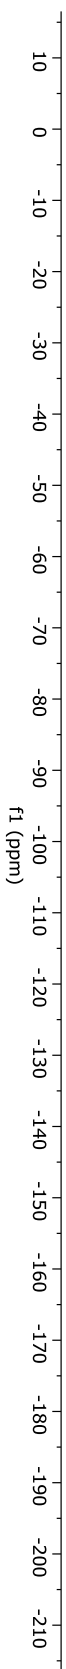

bk1-386-r-p-11.29.11.fid  
PROTON CDCl3 {D:\DATA\West\} Kangjie 2

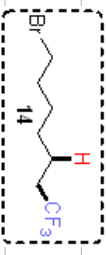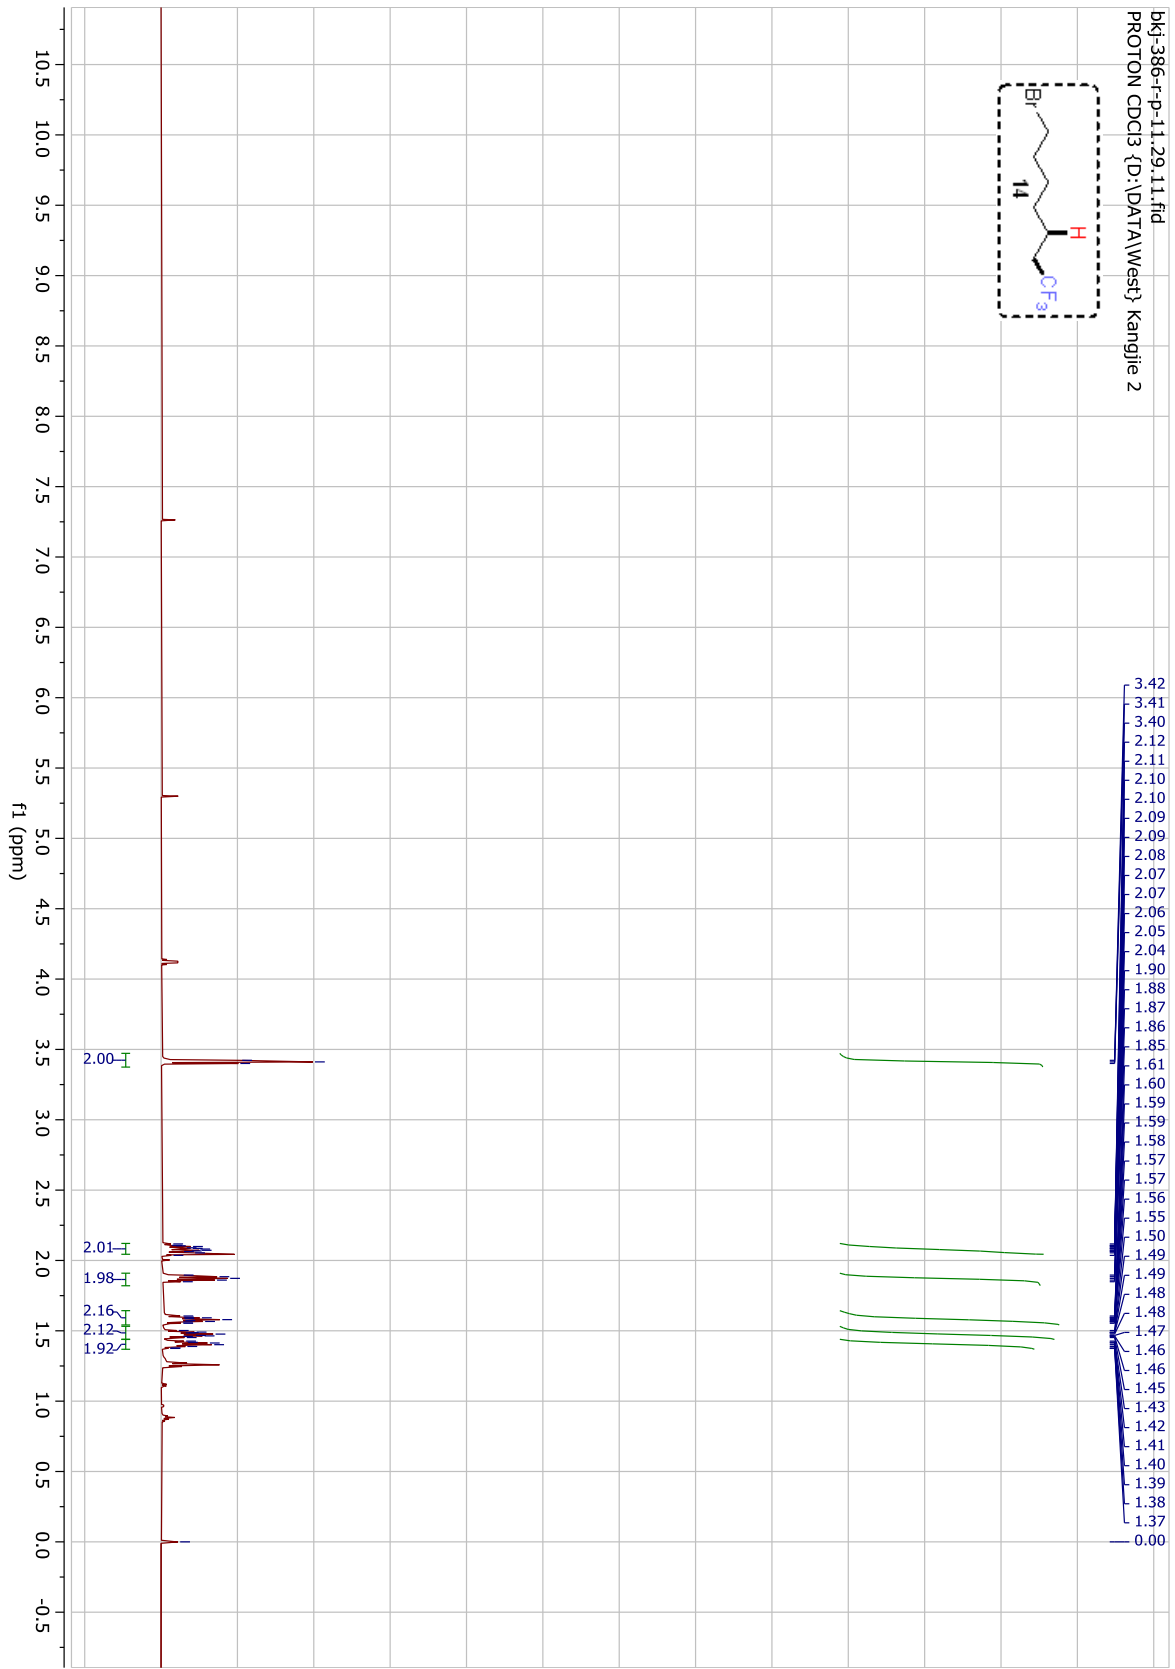

bk1-386-r-p-11.29.10.fid  
C13CPD CDCl3 (D:\DATA\Westj Kangjie 2

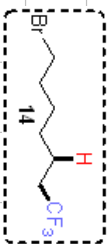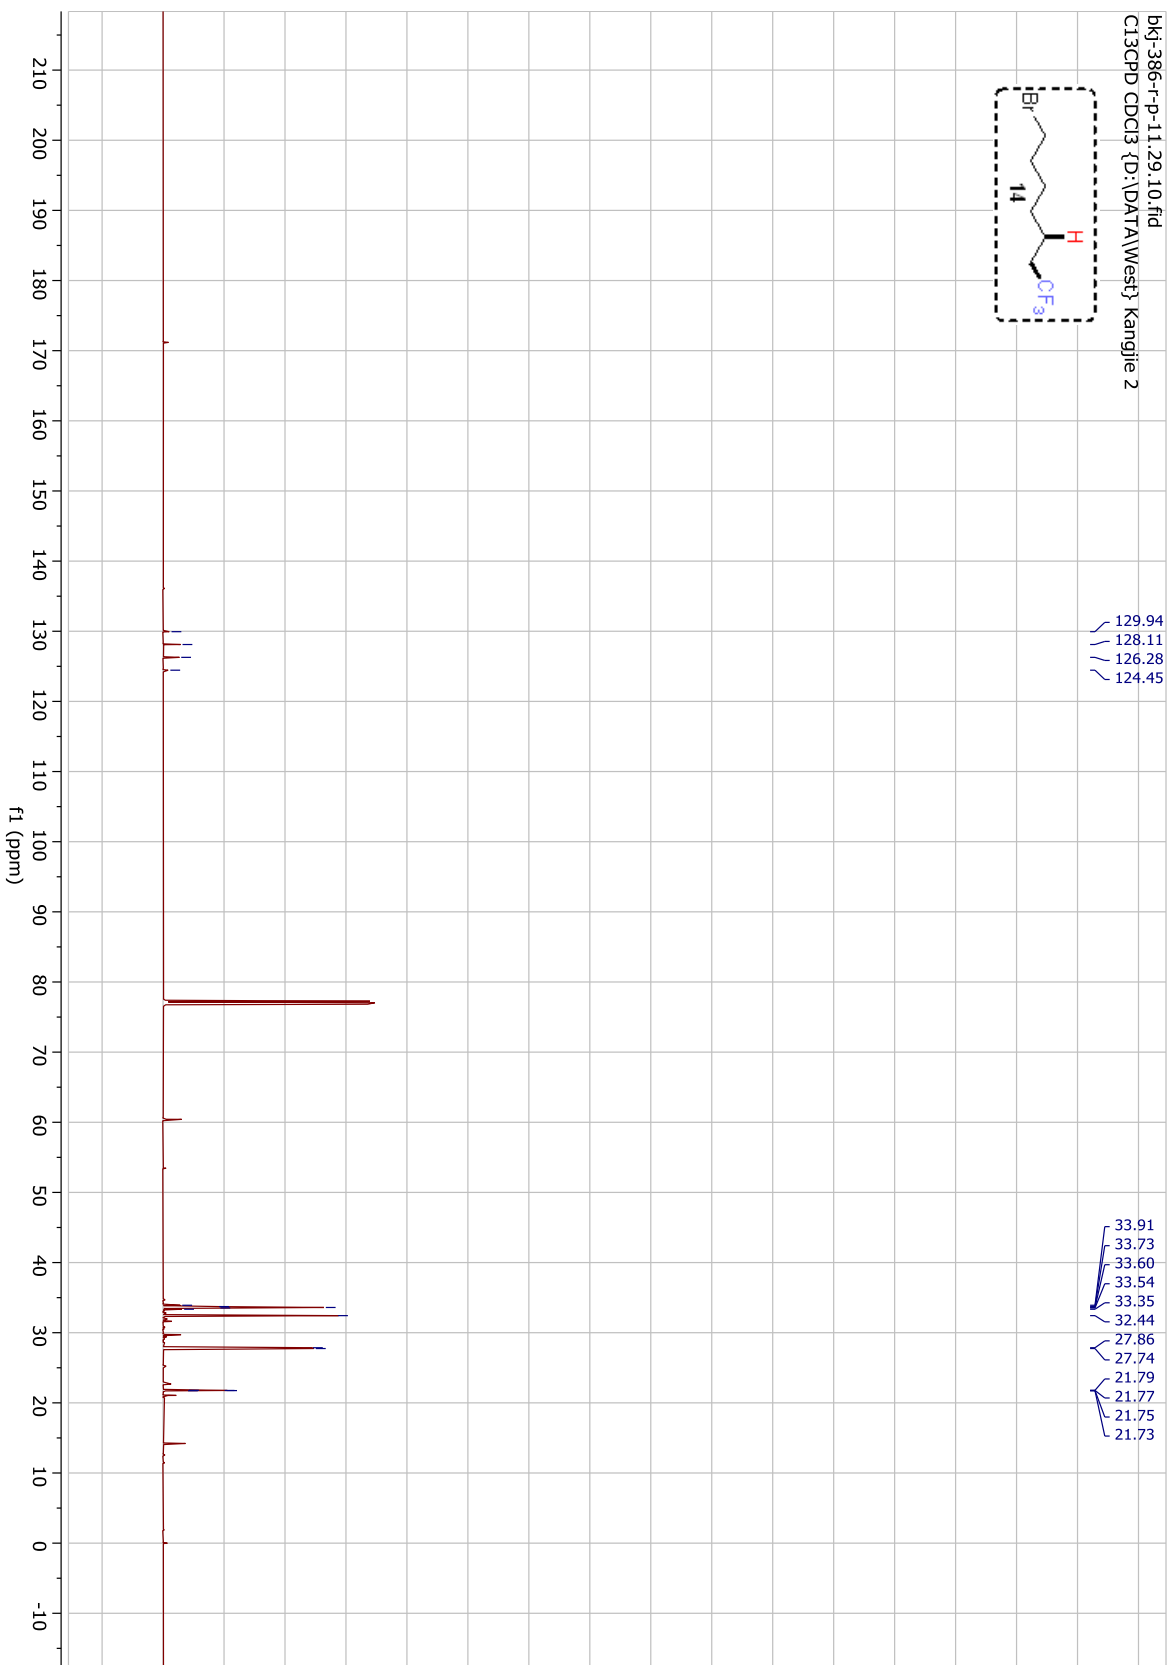

bkj-386-r-p-11.29.12.fid  
F19\_baseline\_correct 1D  
F19\_baseline\_correct CDCl3 {D:\DATA\West} Kangjie 2

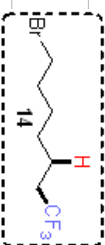

-66.39  
-66.41  
-66.43

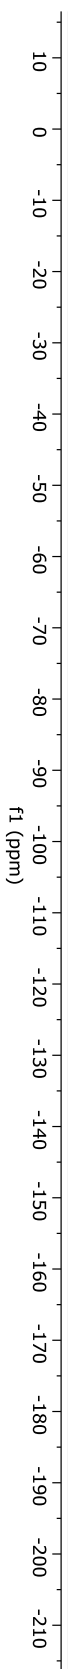

bk1-386-n-p-11.20.10.fid  
PROTON CDCl3 {D:\DATA\West\ Kangjie 7

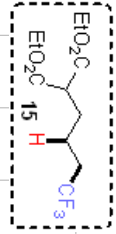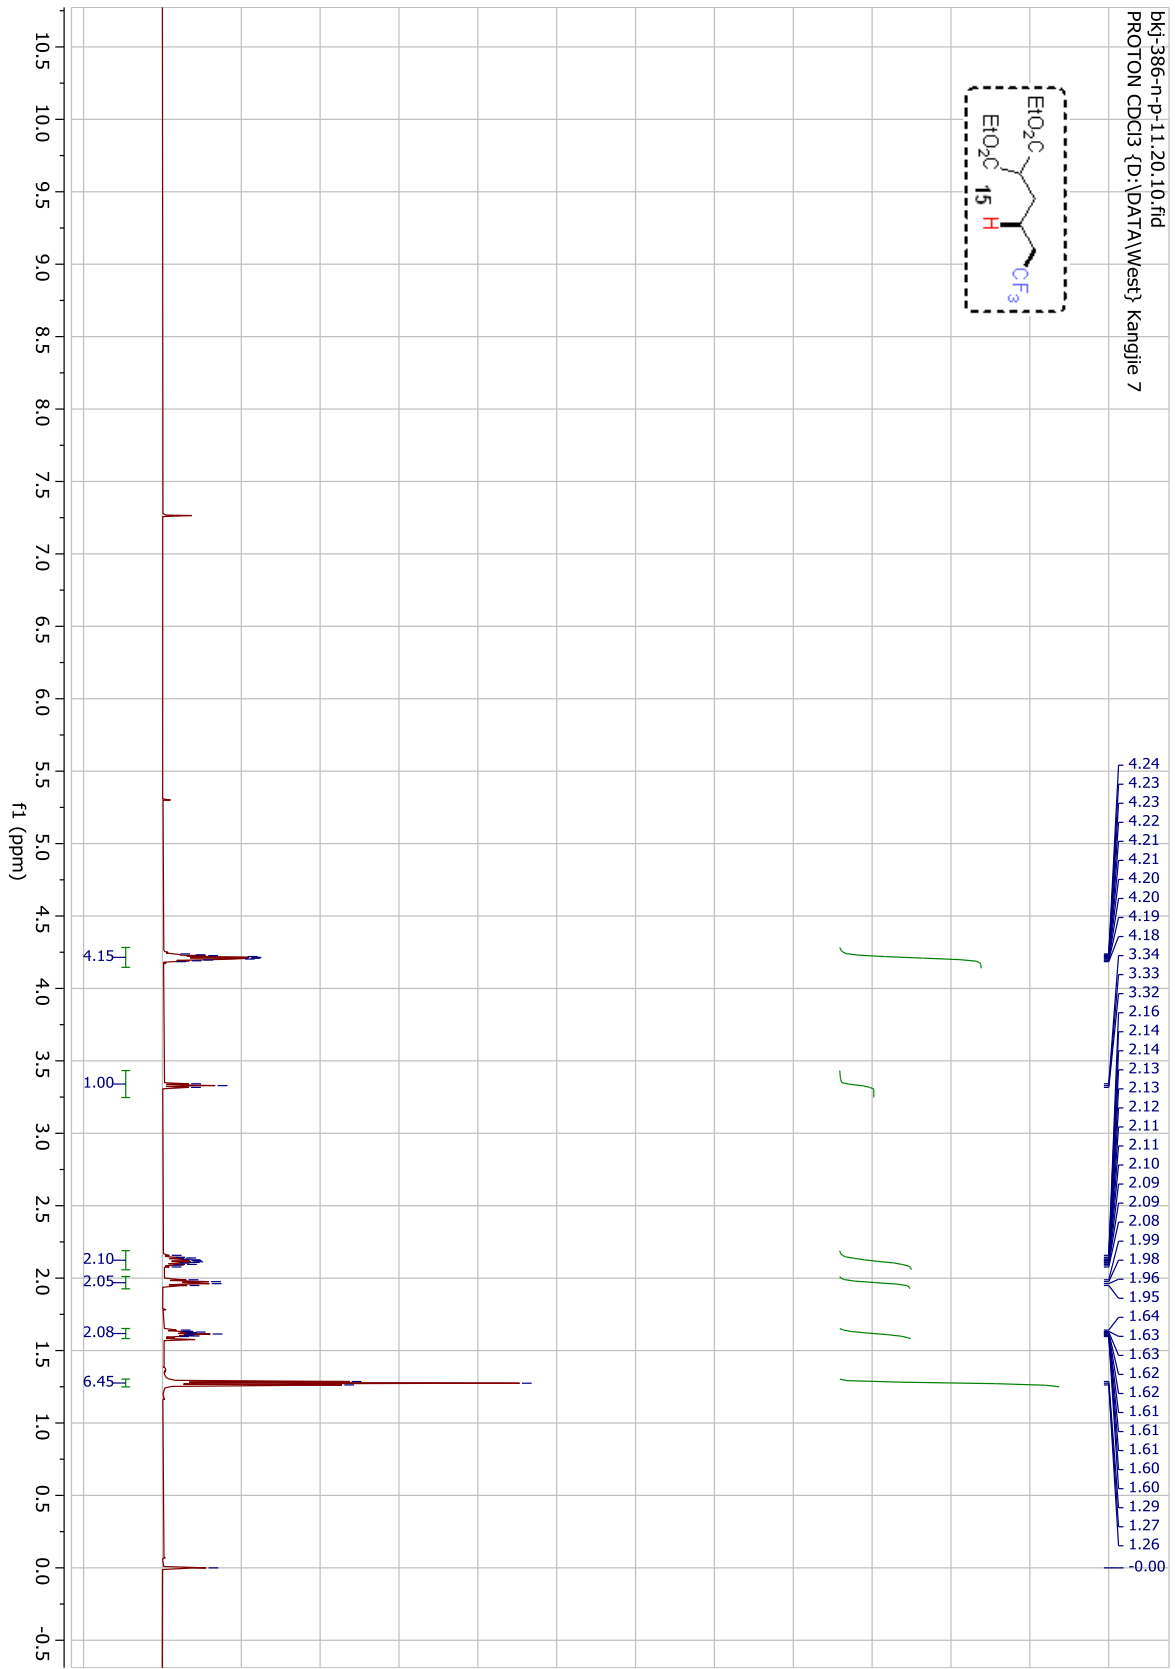

bkj-386-n-p-11.20.11.fid  
C13CPD CDCl3 (D:\DATA\Westj\_Kang) Page 7

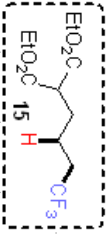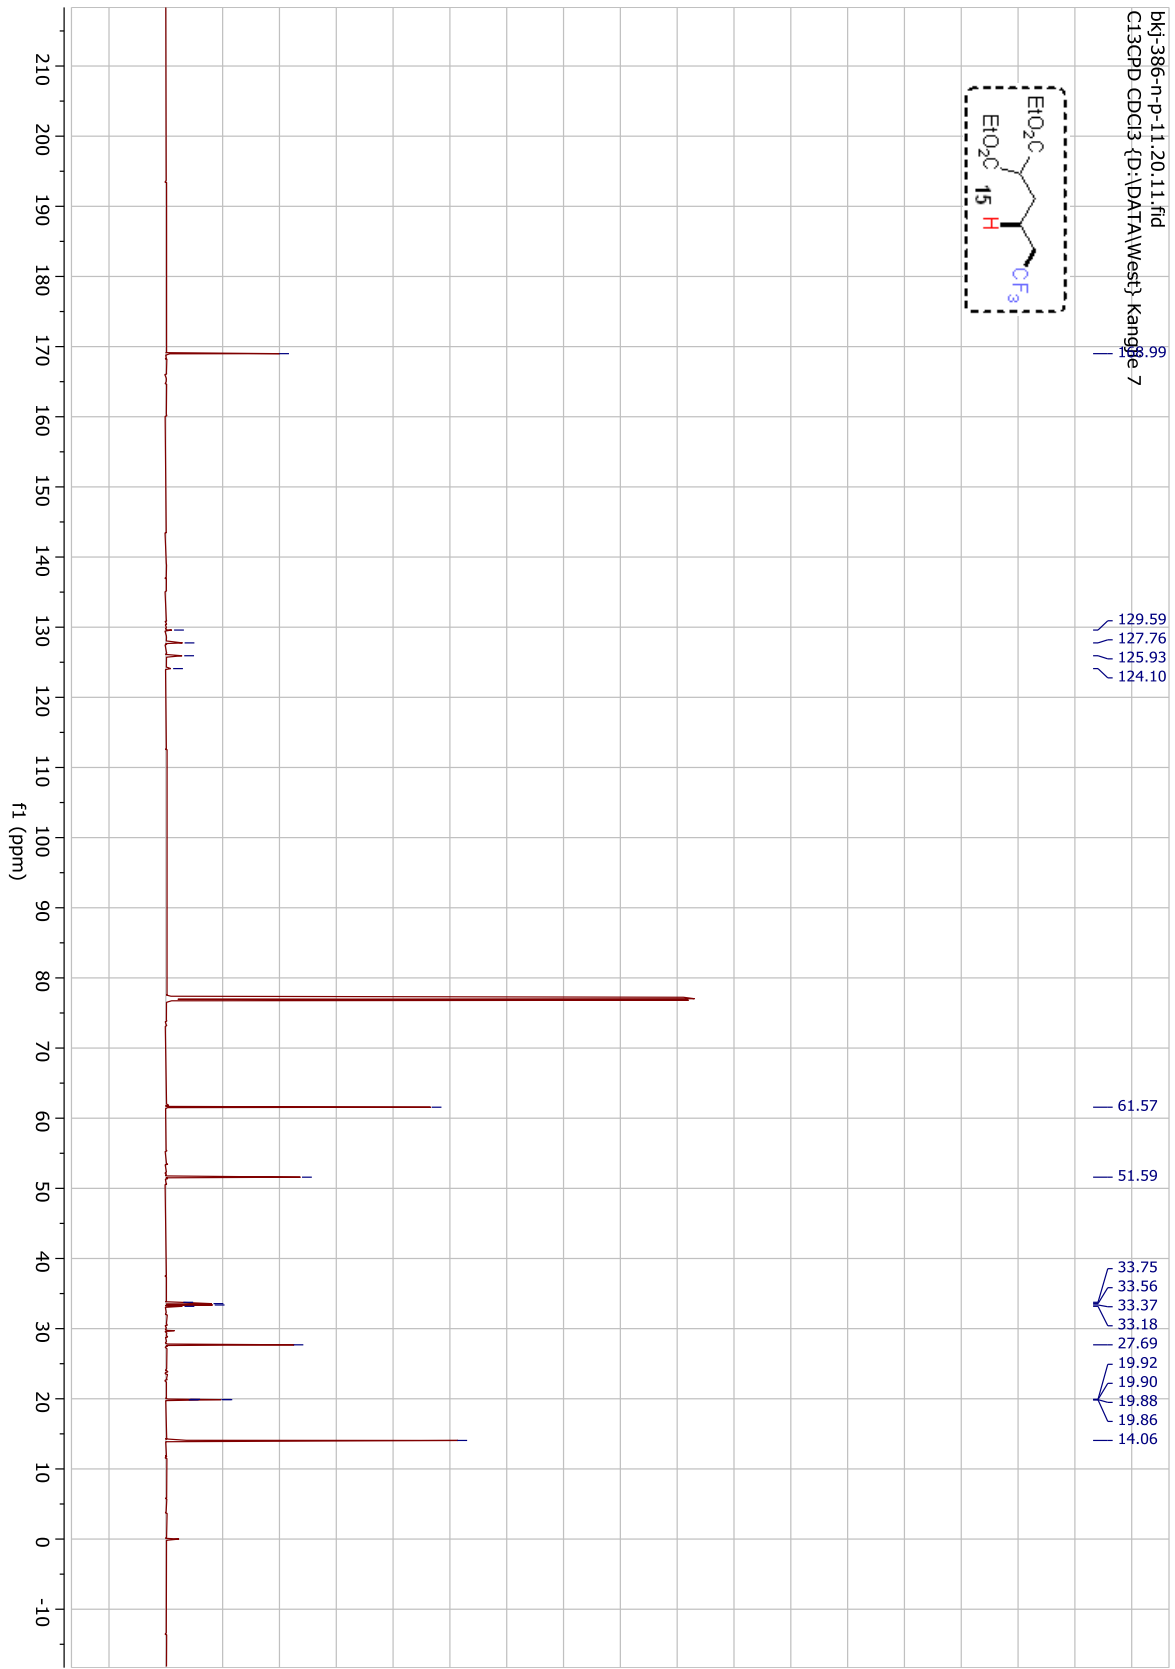

bkj-386-n-p-11.20.12.fid  
F19\_baseline\_correct\_1D  
F19\_baseline\_correct CDC13 {D:\DATA\West} Kangjie 7

96.38  
96.40  
96.42

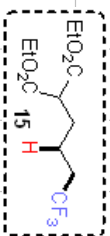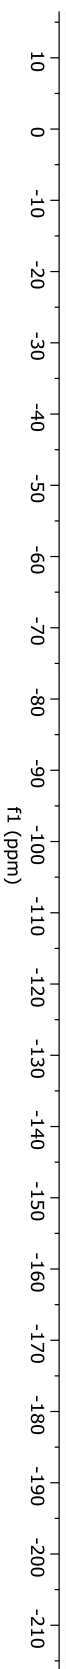



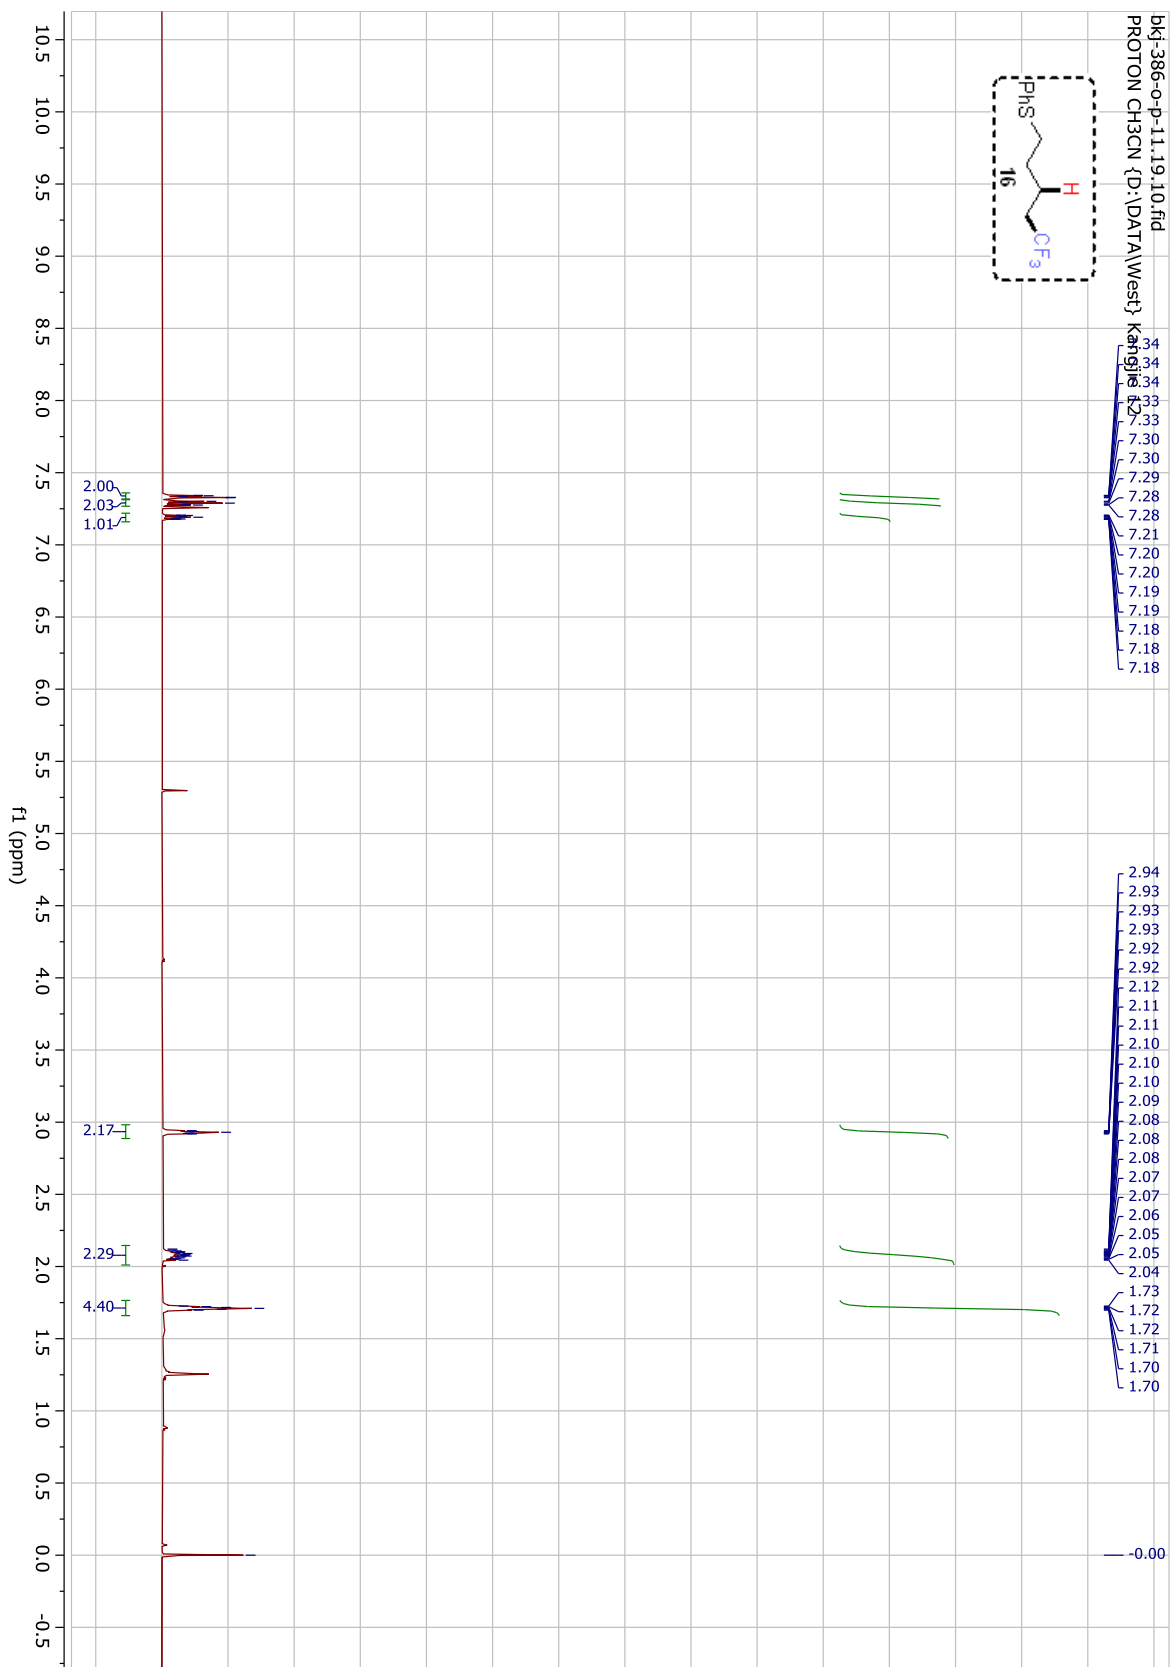

bkj-386-o-p-11.19.11.fid  
C13CPD CDCl3 (D:\DATA\Westj\_Kangjie 12

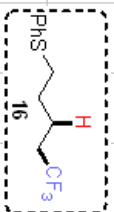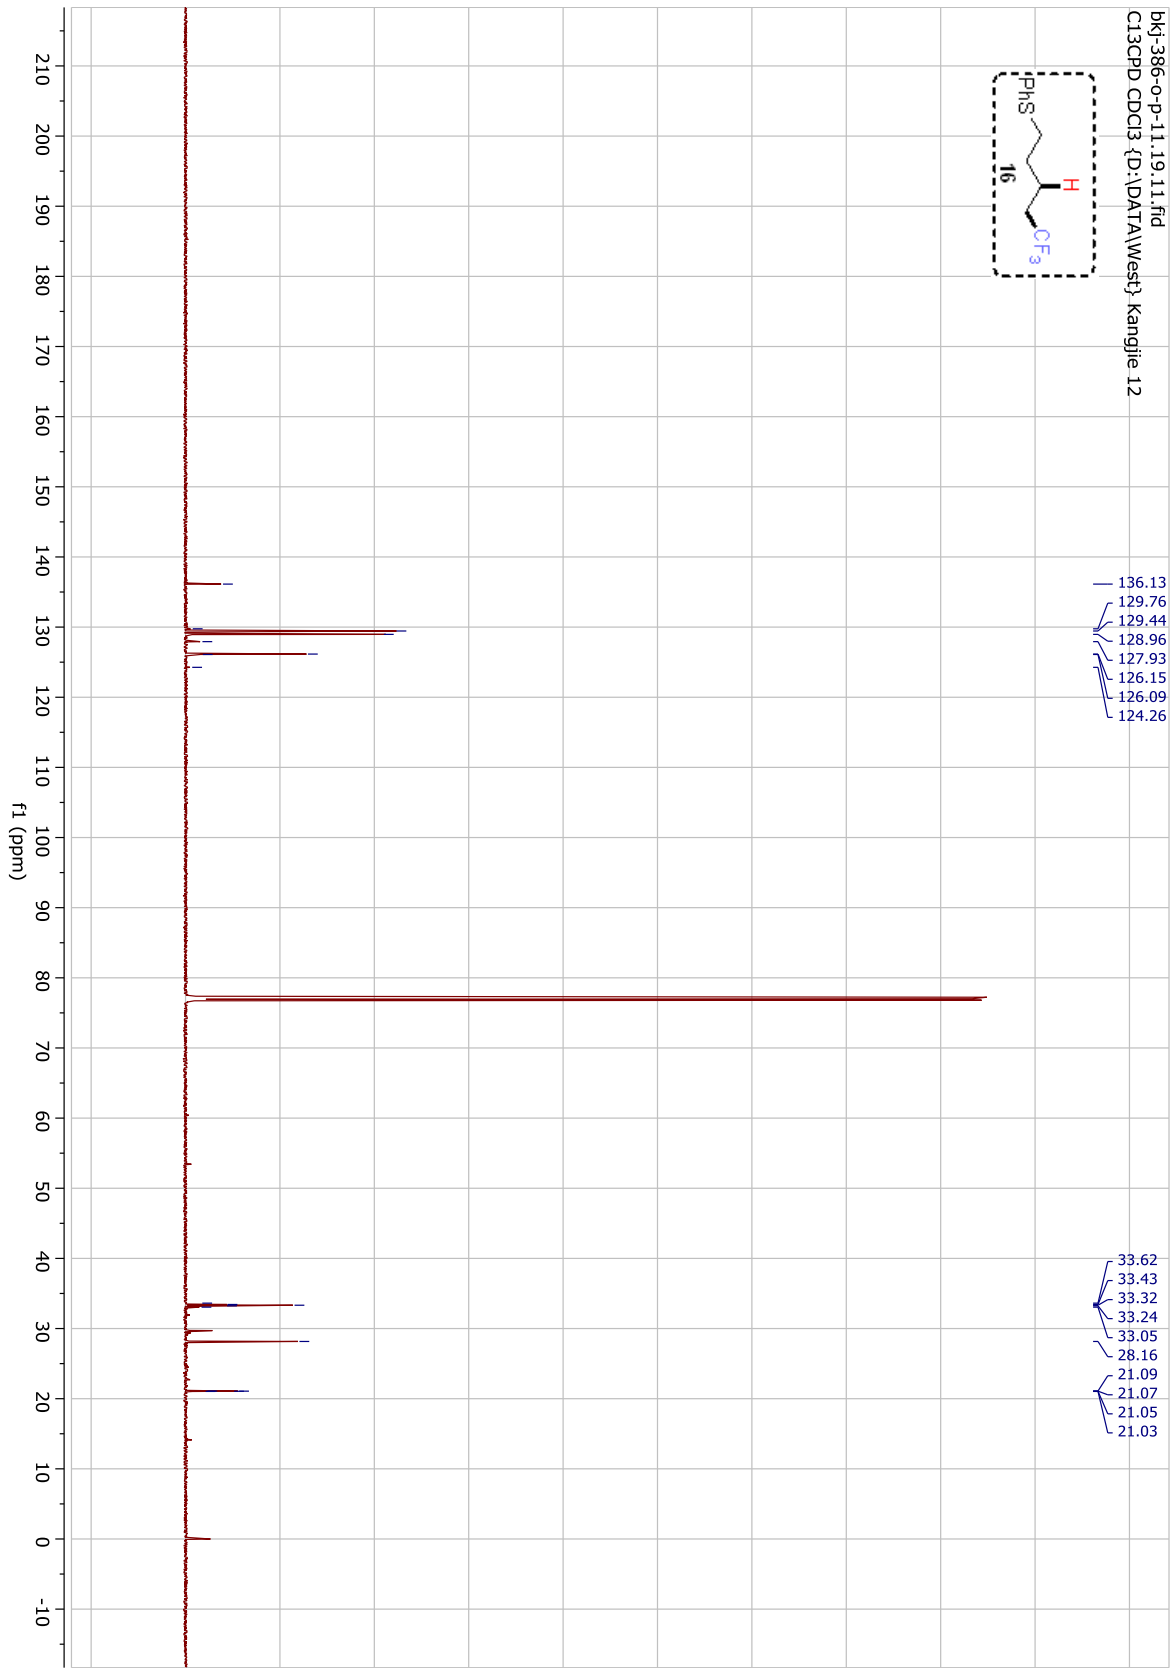

bkj-386-o-p-11.19.12.fid  
F19\_baseline\_correct 1D  
F19\_baseline\_correct CDCl3 {D:\DATA\West\ Kangjie 12

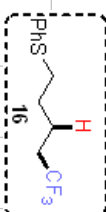

66.33  
66.35  
66.37



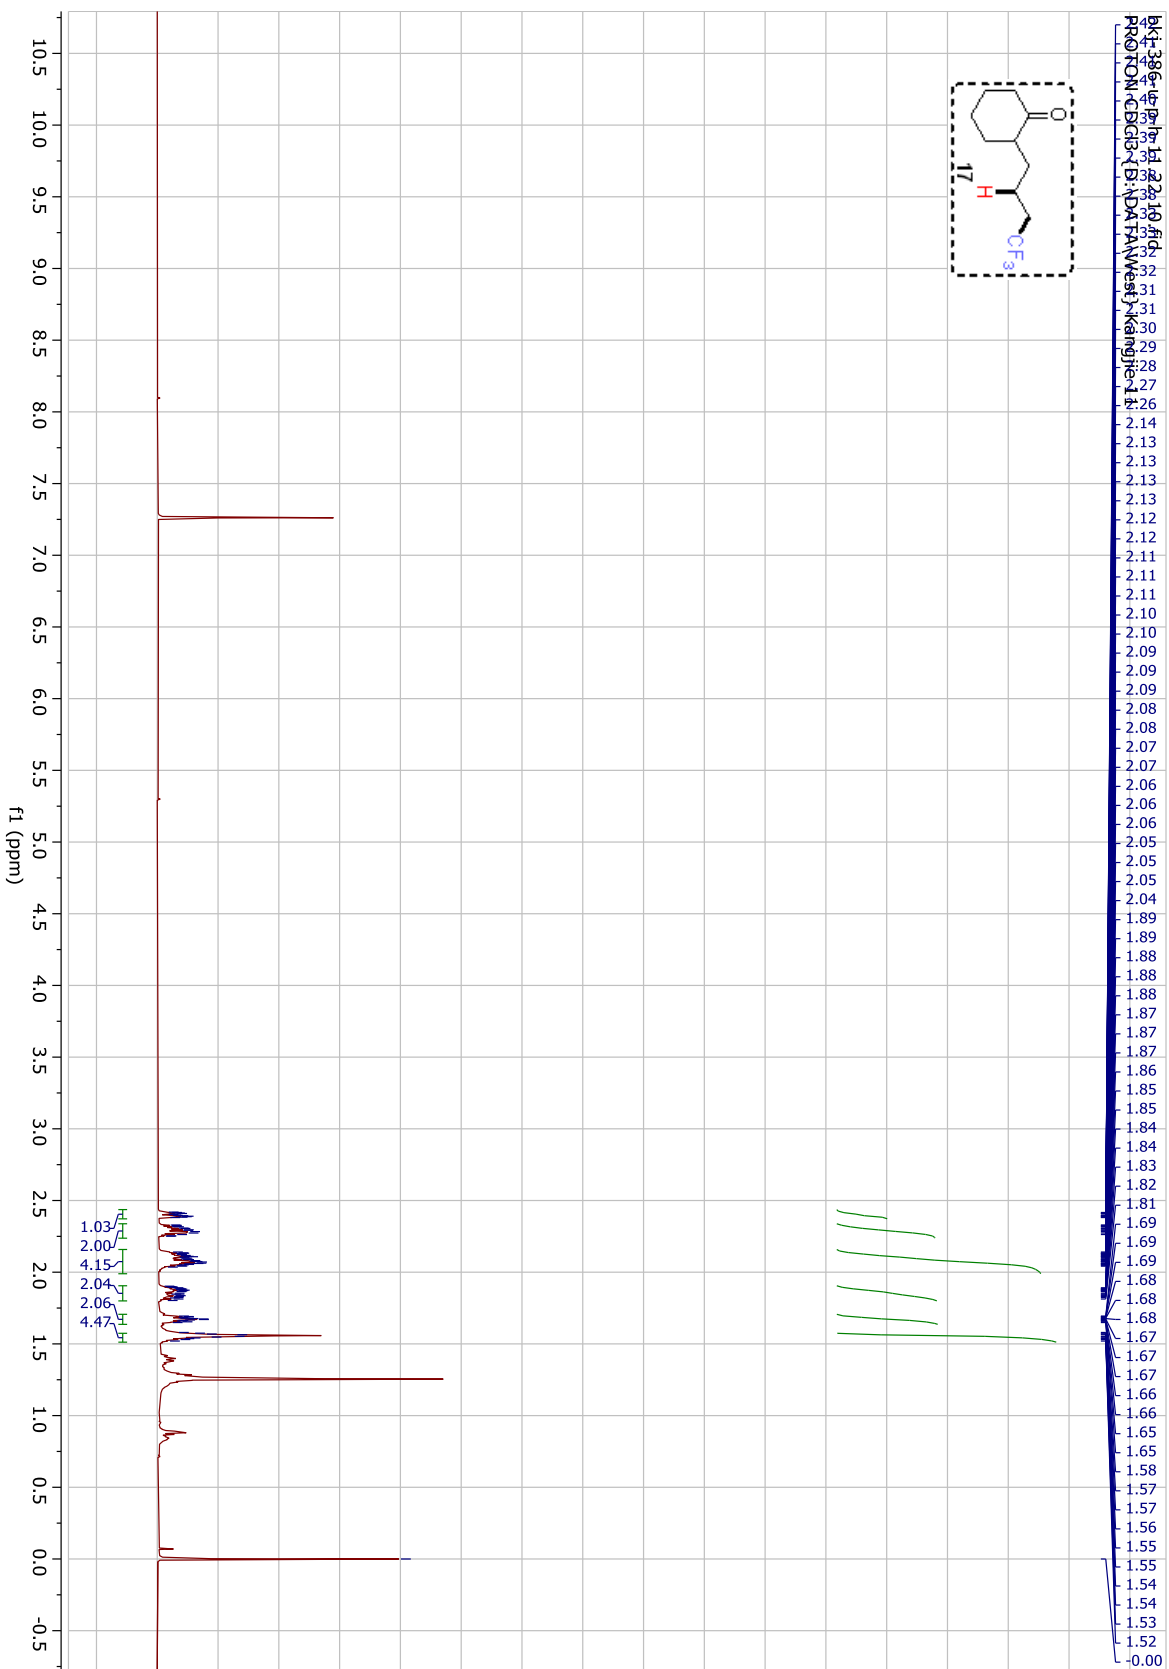

bk1386-u-p-c-11.22.13.fid  
C138PD CDCl3 (D:\DATA\West\ Kangjie 11

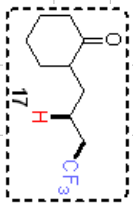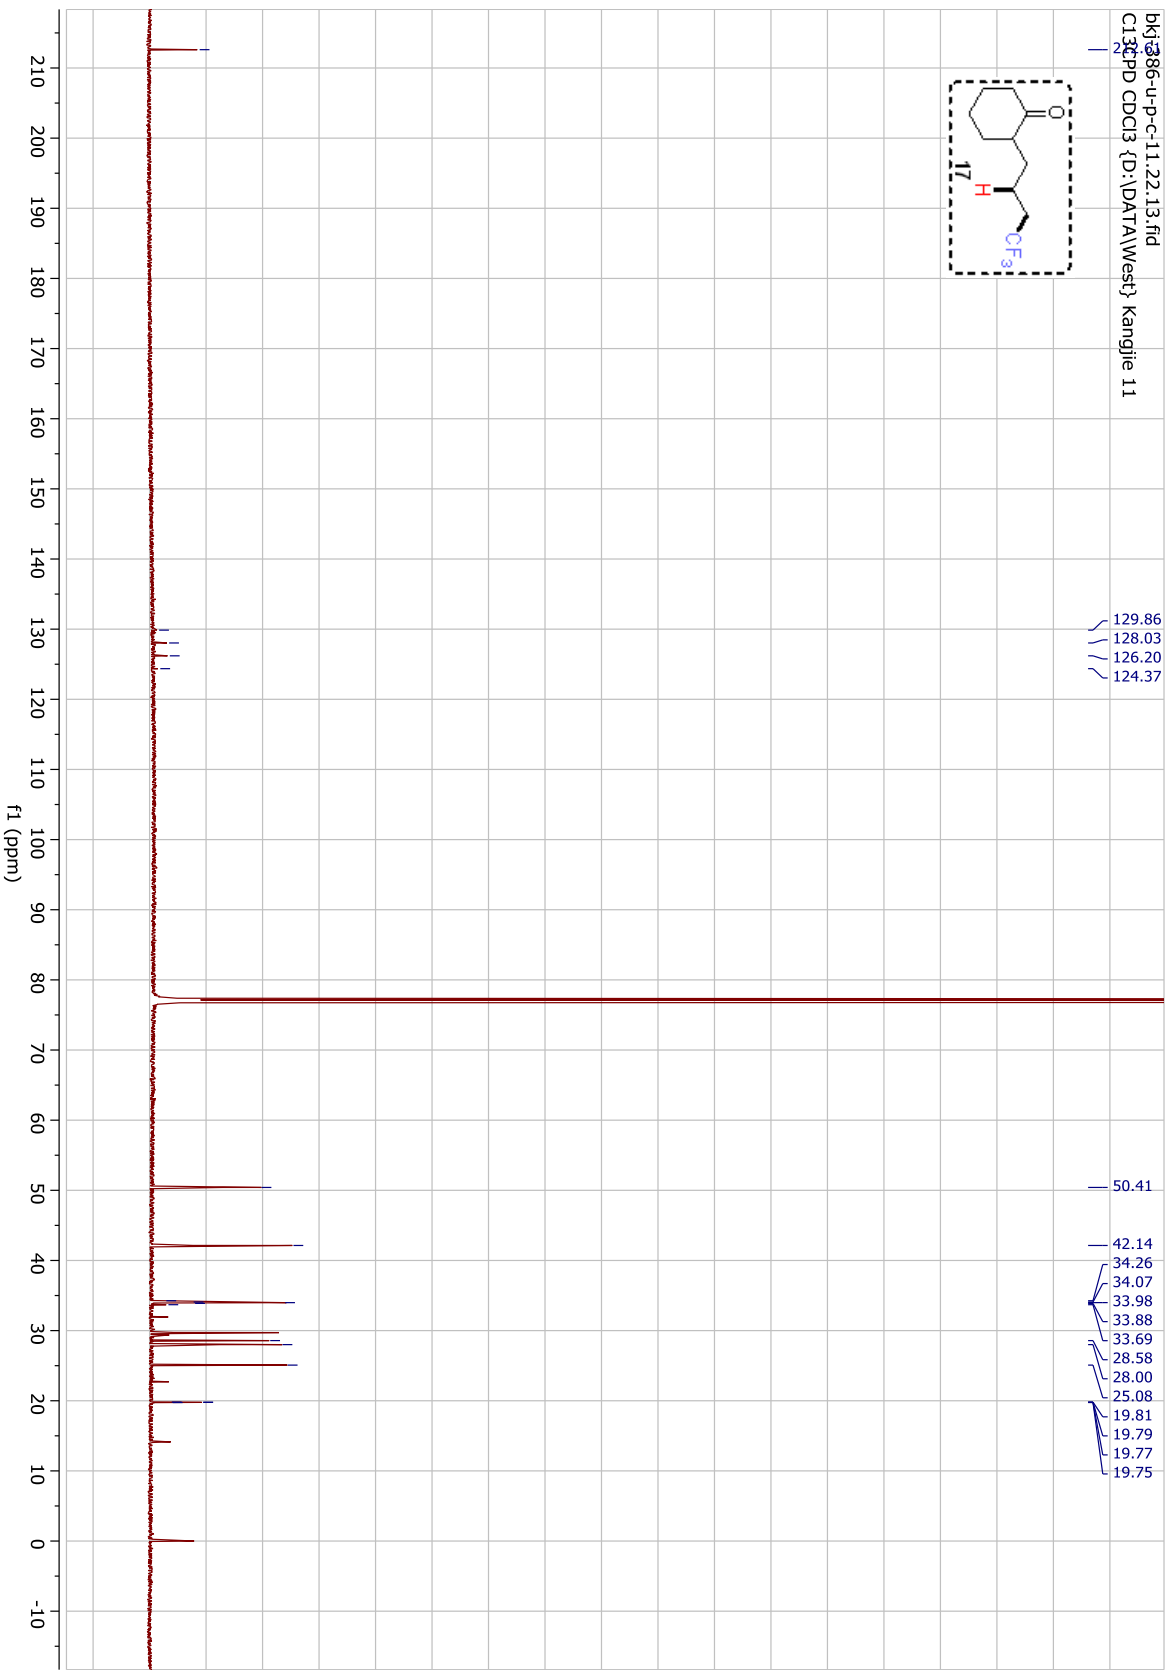

bkj-386-u-p-h-11-22-11.ftd  
F19\_baseline\_correct ID  
F19\_baseline\_correct CDCI3 {D:\DATA\West\ Kangjie 11

96.36  
96.38  
96.40

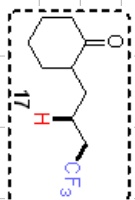

bkj-386-aab-p-h-3.7.3.fid  
PROTON CDCl3 {E:\DATA\_West\Kangjie 9

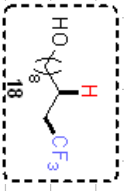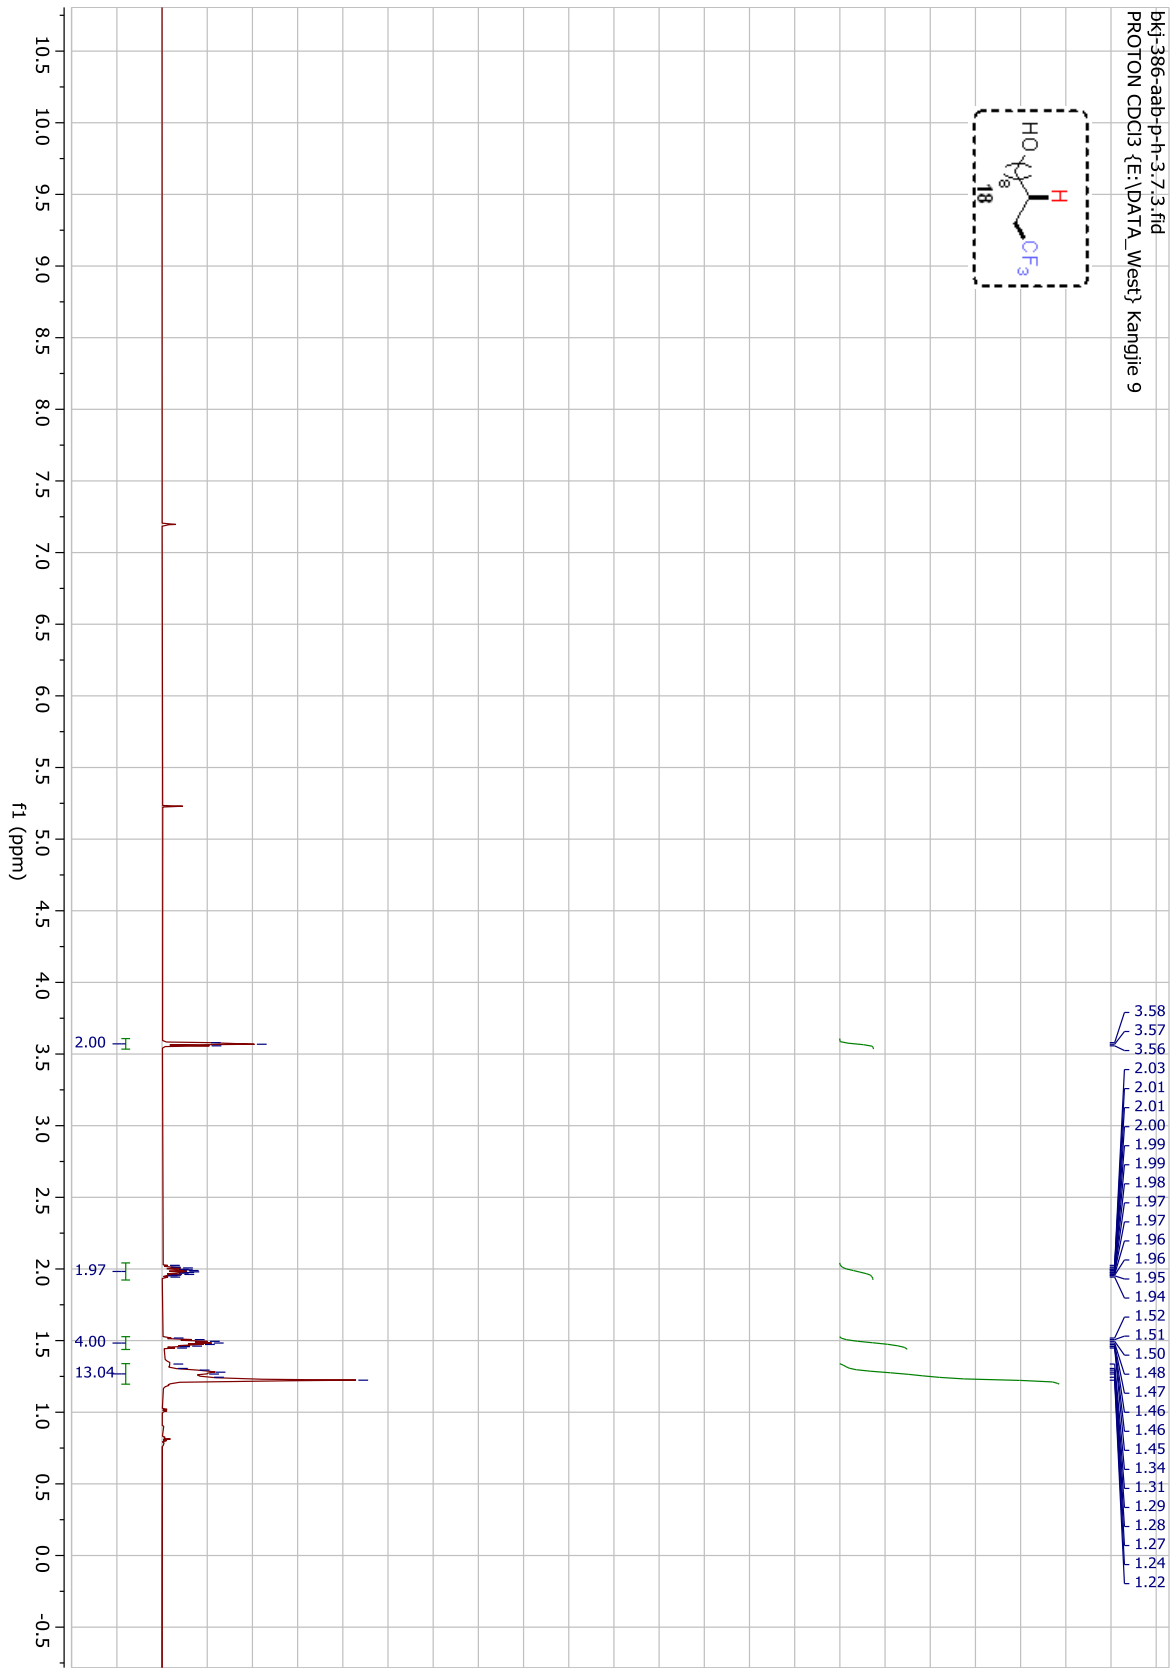

bkj-386-aab-p-c-3-7-4.ftd  
C13CPD CDCl3 {E:\DATA\_West\Kangjie 9

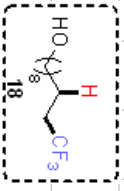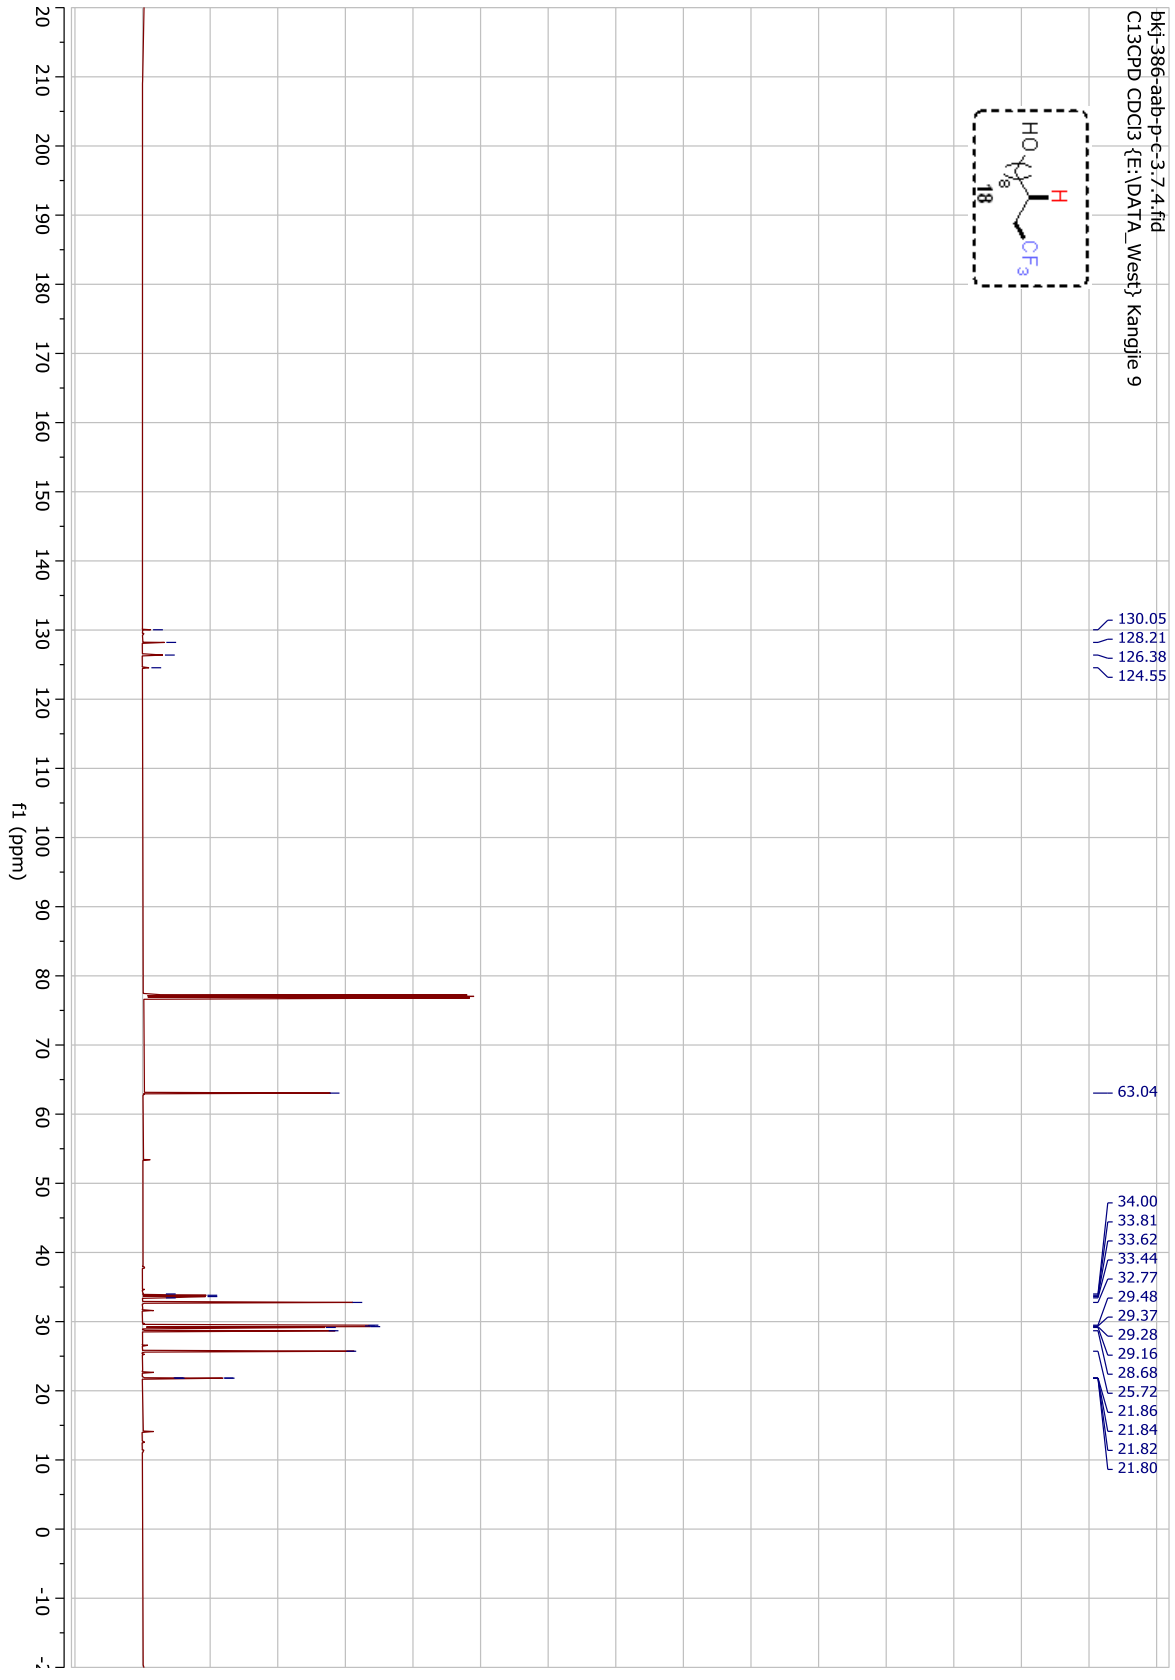



bkj-386-aab-p-f-3.7.10.fid  
F19

F19 CDCl3

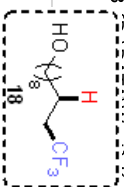

-66.42  
-66.44  
-66.46

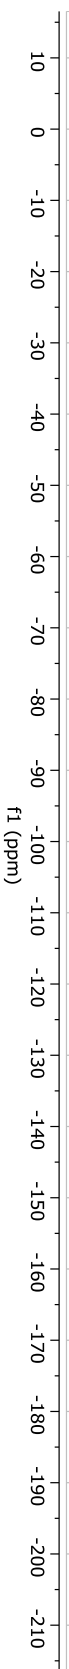

bkj-386-q-p-h-1.22.10.fid  
PROTON CDCl<sub>3</sub> {D:\DATA\West\ Kangjie 9

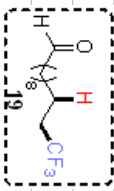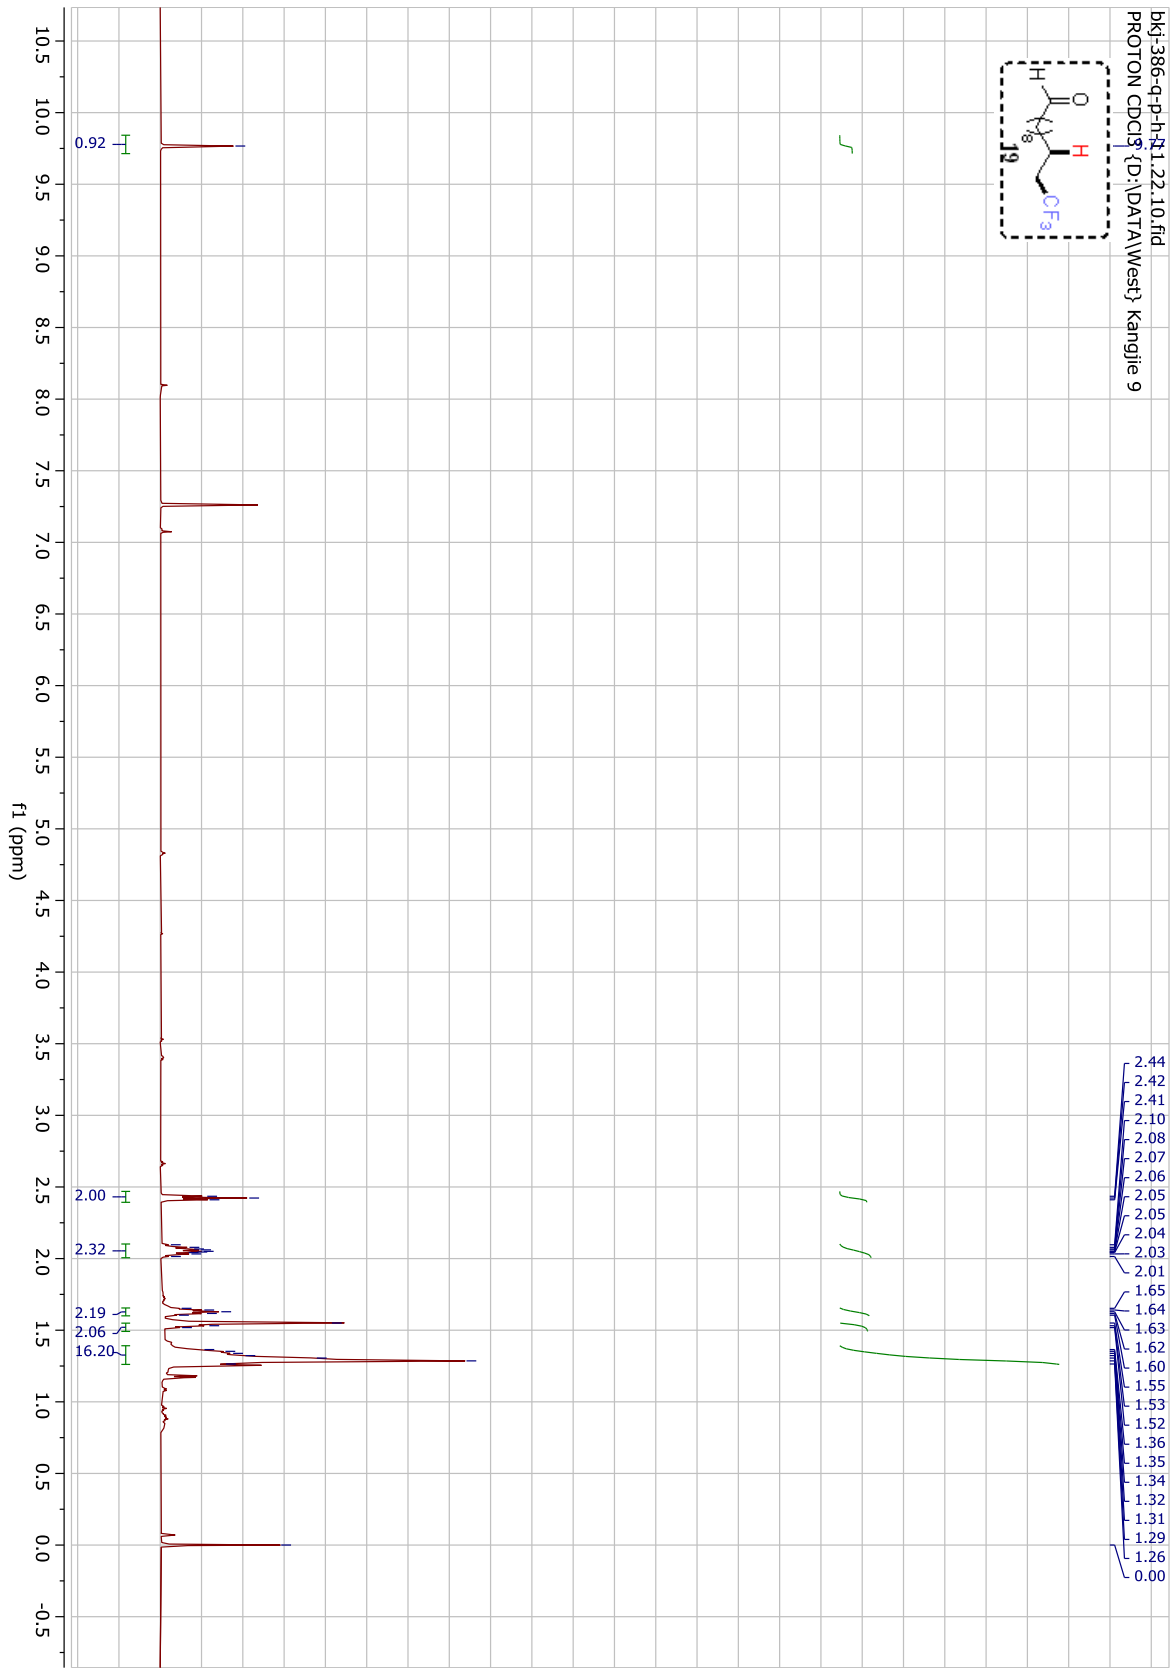

bkj-386-q-p-h-11.22.11.ftd  
C130 CDCl3 (D:\DATA\Westj kangjie 9

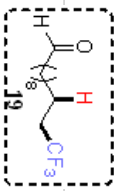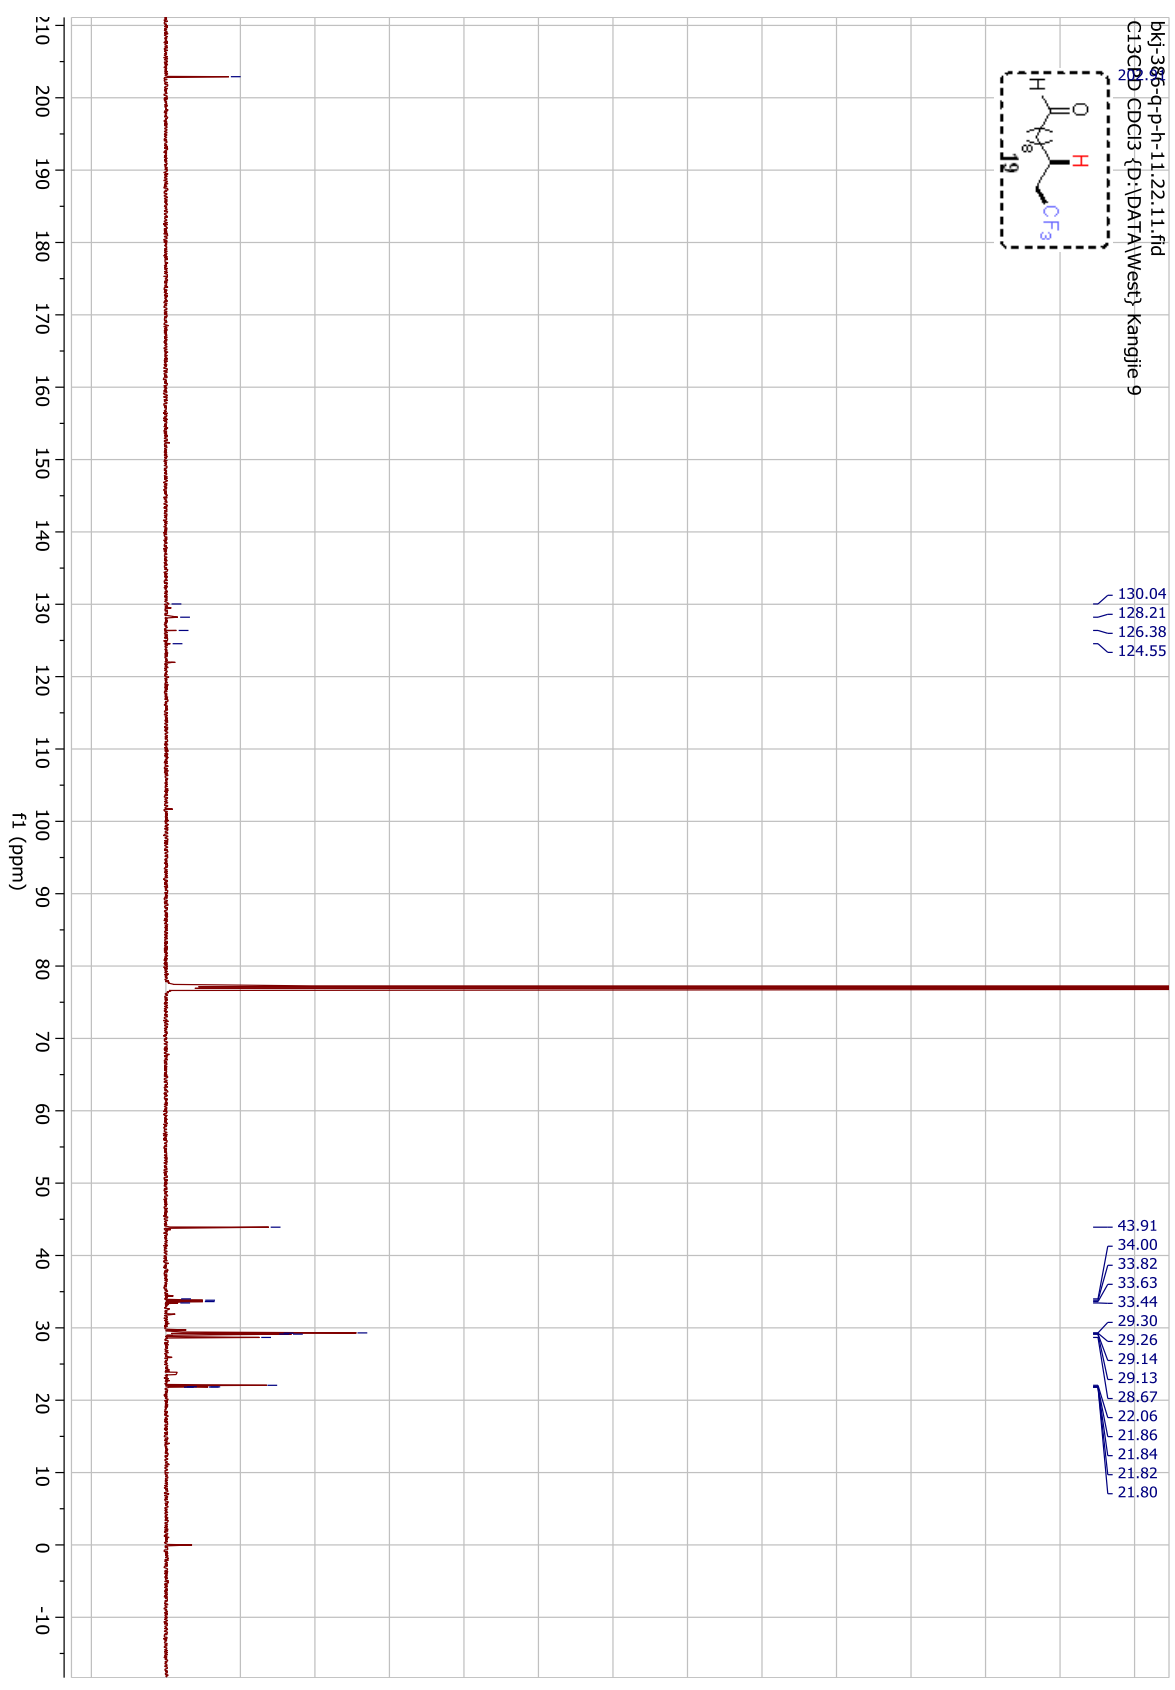

bkj-386-q-p-h-11-22-12.fid  
F19\_baseline\_correct ID

13 {D:\DATA\West\ Kangjie 9

66.39  
66.40  
66.41  
66.42  
66.43

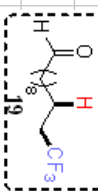

bkj-386-s-p-c-11.22.10.fid  
PROTON CDQ3 {D:\DATA\West\ Kangjie 3

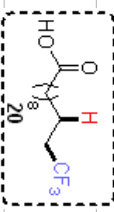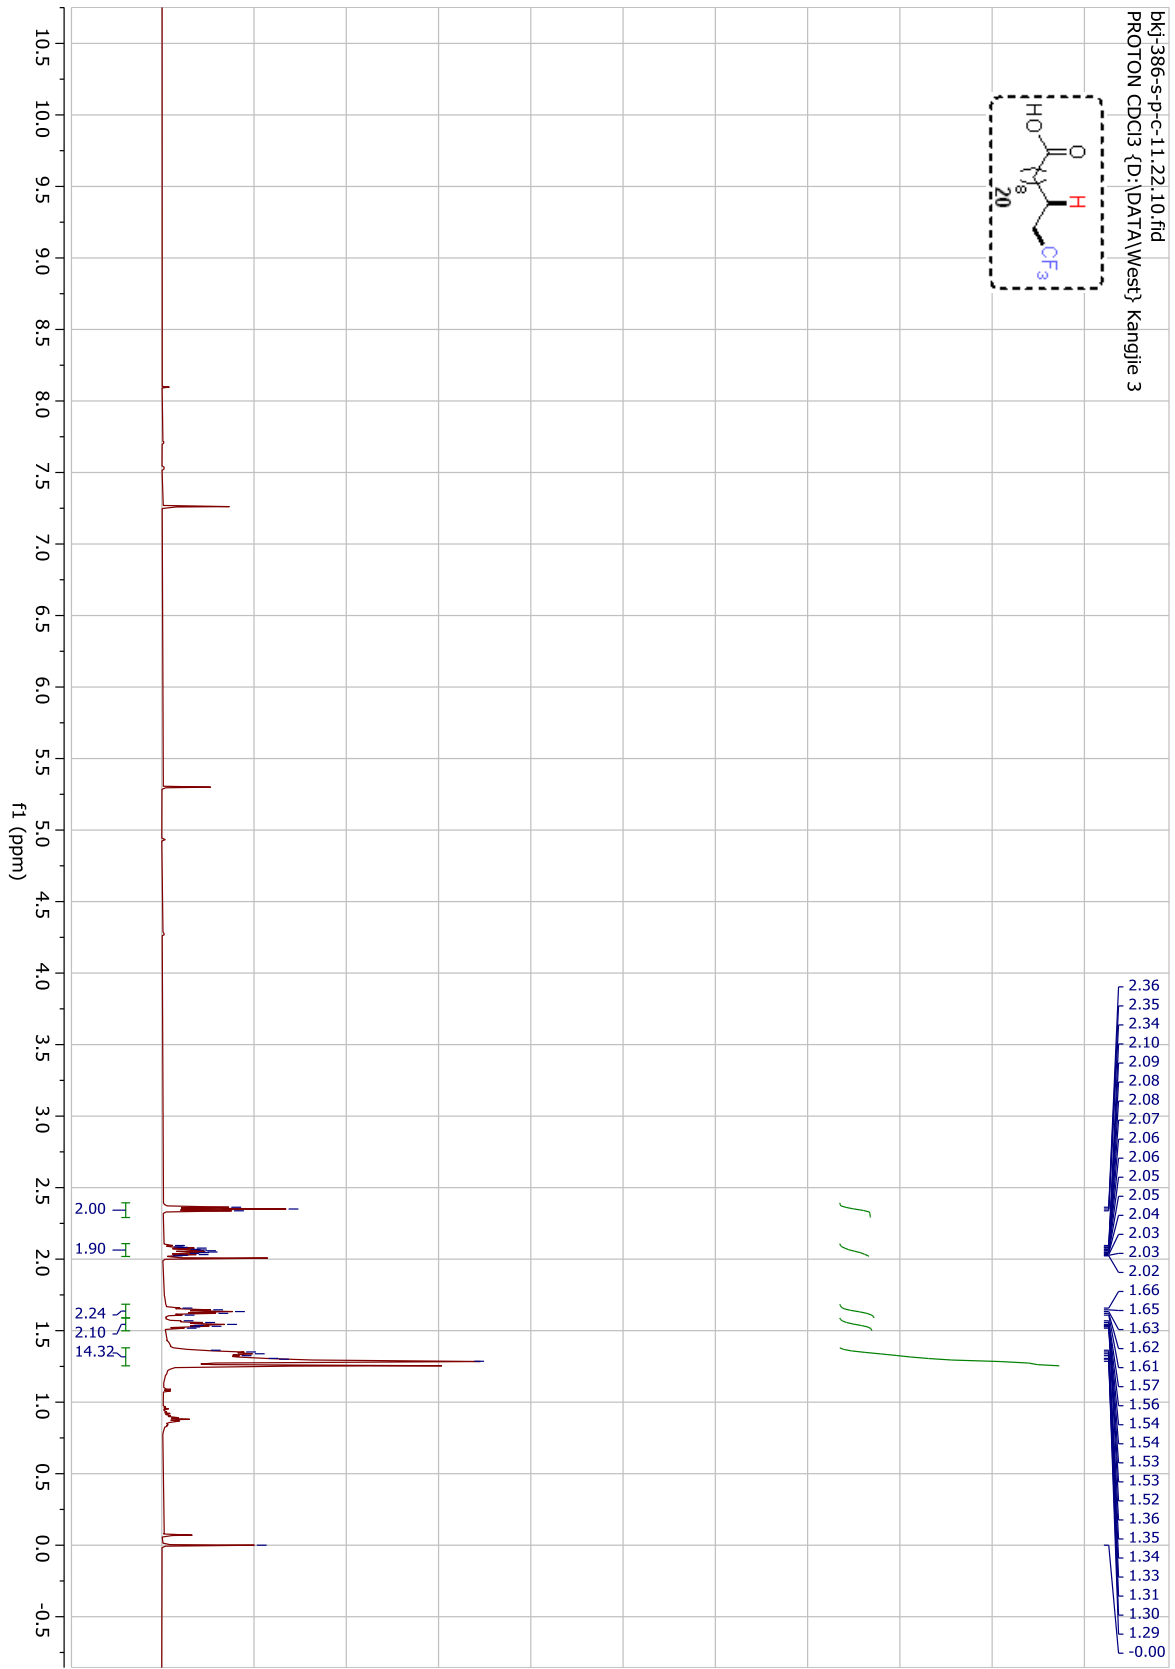

bkj-386-s-p-c-11.22.11.fid  
C13CPD CDCl3 (D:\DATA\We...)  
Kangjie 3

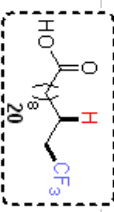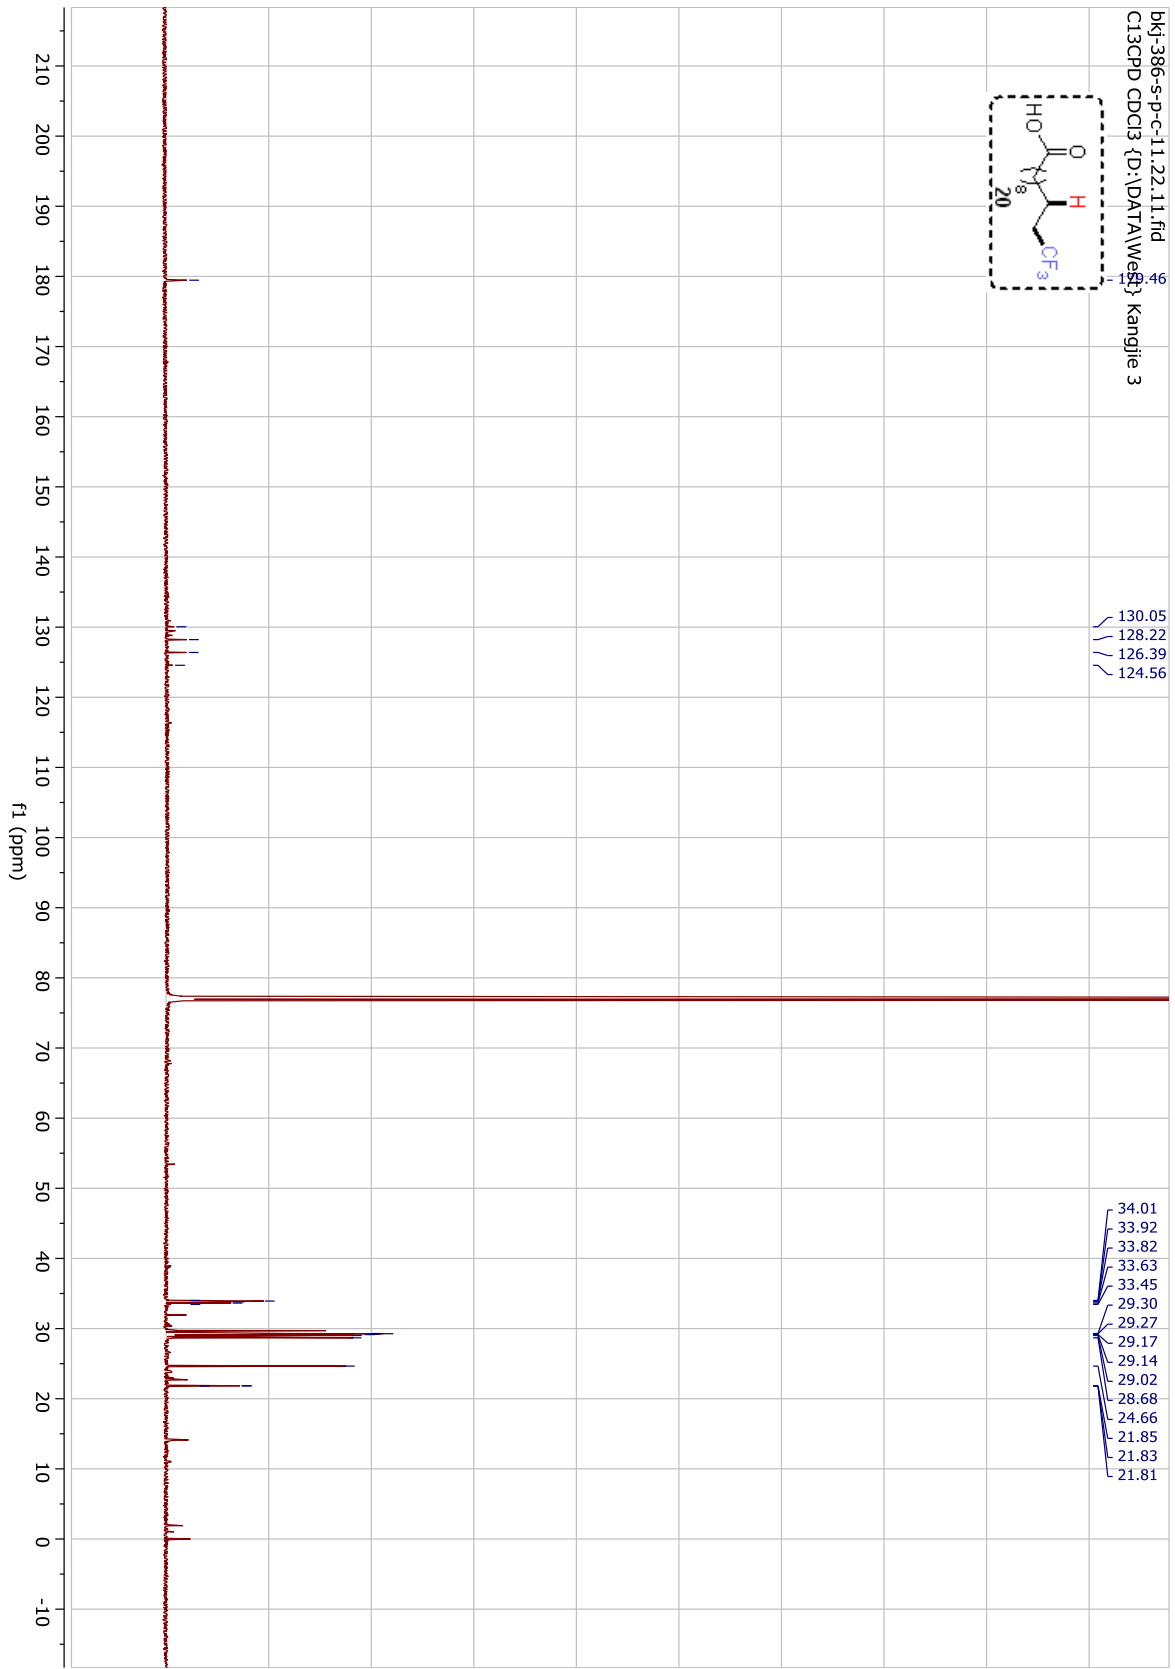

bkj-386-s-p-c-11.22.12.fid  
F19\_baseline\_correct ID  
F19\_baseline\_correct F1913 1D \DATA\West\ Kangjie 3

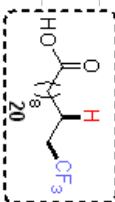

-66.40  
-66.42  
-66.44



bj1-386-v-p-h-11.24.10.fid  
PROTON CDCl3 {D:\DATA\Westf\Kanglie 4

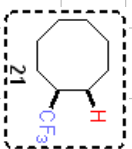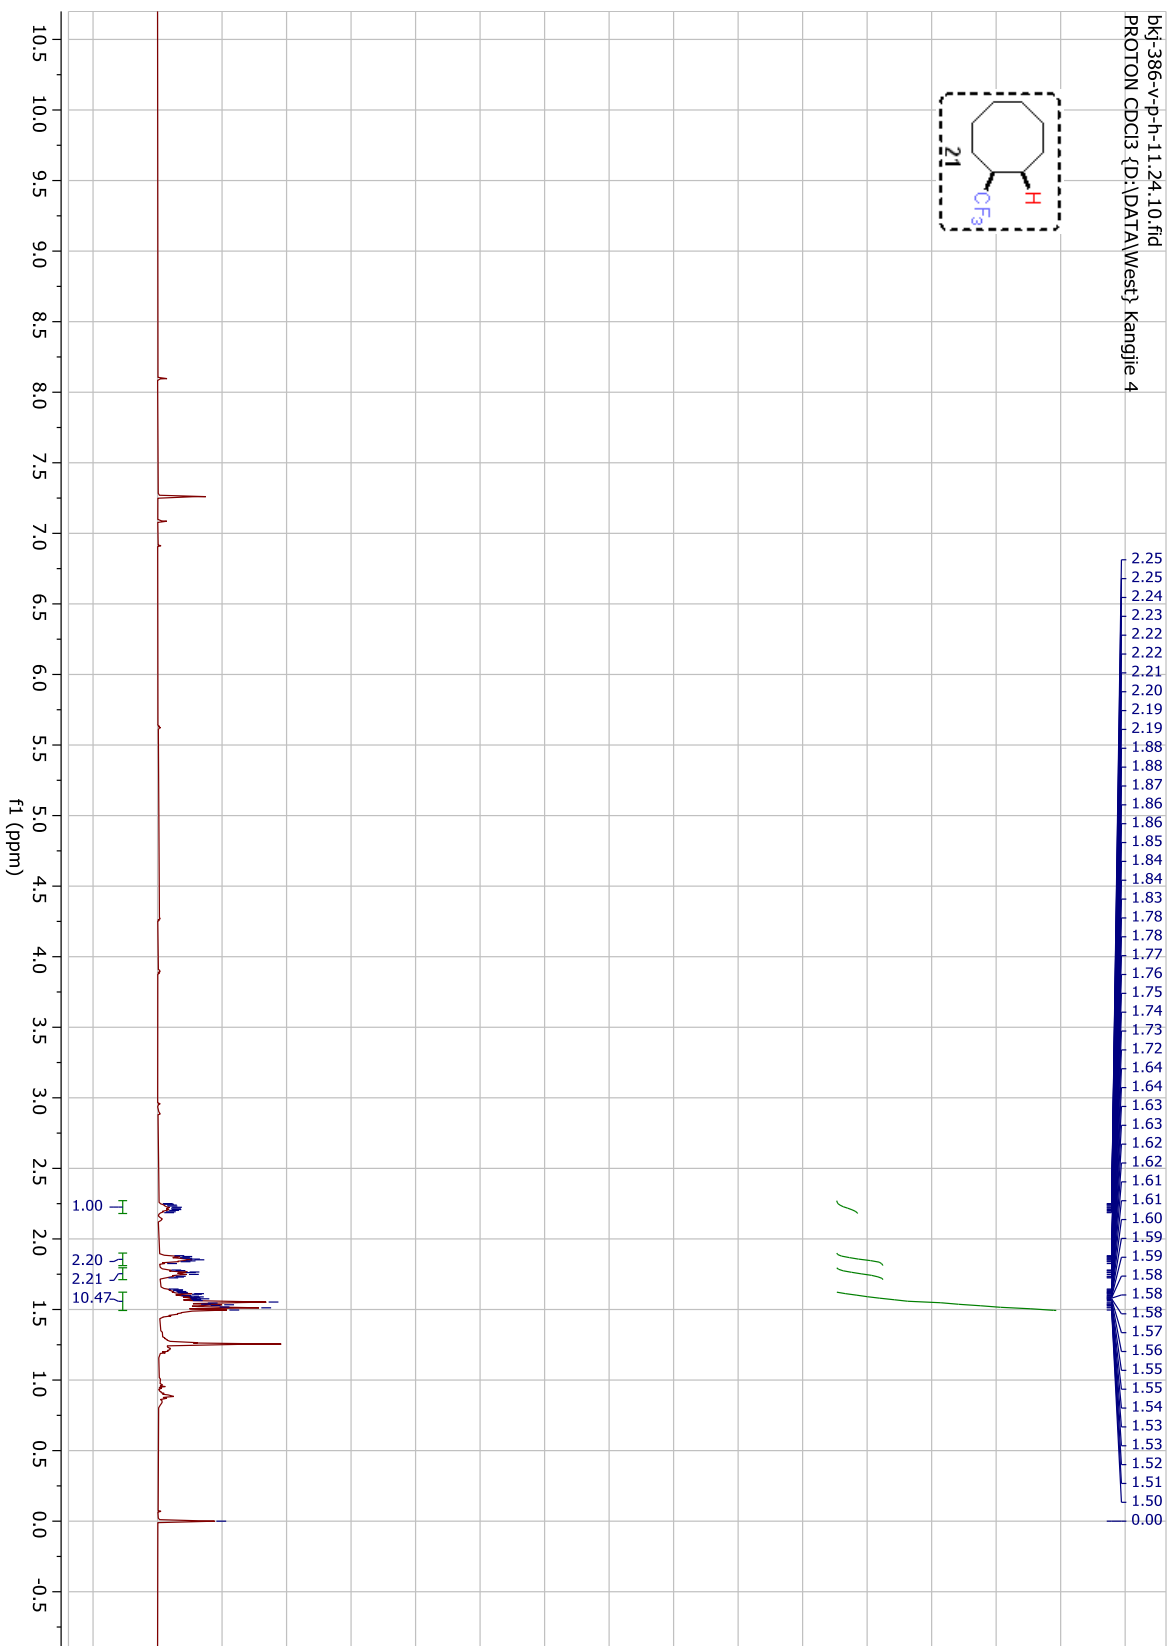



bjf-386-v-p-h-11.24.12.fid  
C13CPD CDCl3 (D:\DATA\Westj\_Kangjie\_4

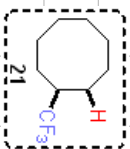

131.75  
129.90  
128.05  
126.19

42.16  
42.00  
41.84  
41.68  
26.38  
26.29  
25.59  
25.58  
25.56  
25.54  
25.11

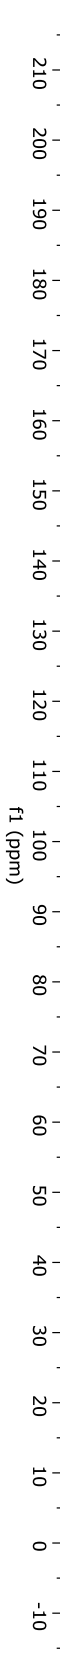

bkj-386-v-p-h-11.24.11.fid  
F19\_baseline\_correct ID  
F19\_baseline\_correct CDCI3 {D:\DATA\West} Kangjie 4

-73.33  
-73.35

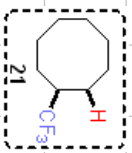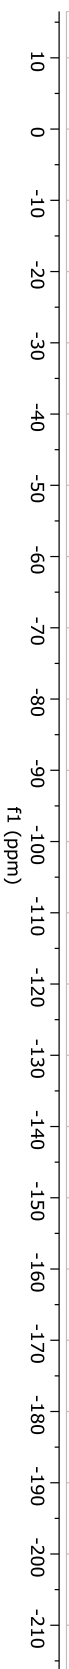

bk1-386-x-p-h-11.23.10.fid  
PROTON CDG3 {D:\DATA\Westfj\_Kangjie 22

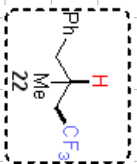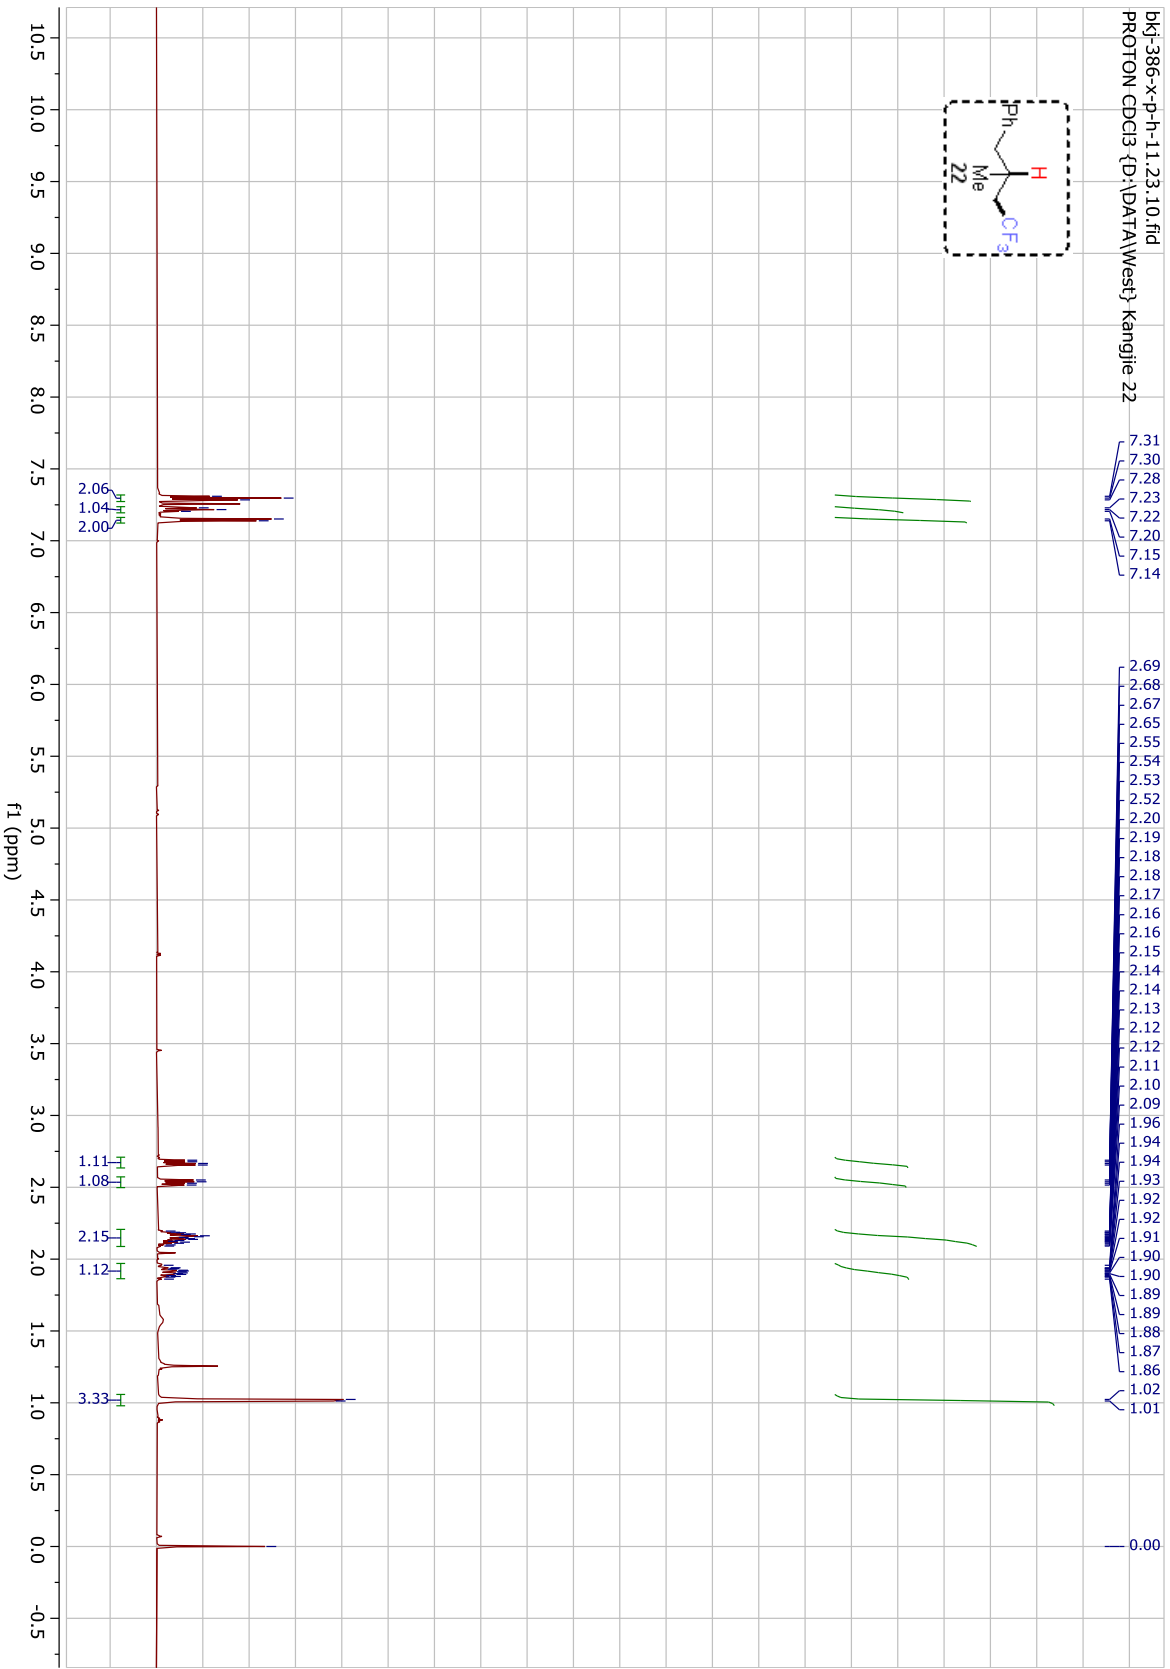

bjf-386-x-p-c-11.23.10.fid  
C13CPD CDCl3 (D:\DATA\Westj Kangjie 22

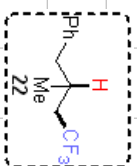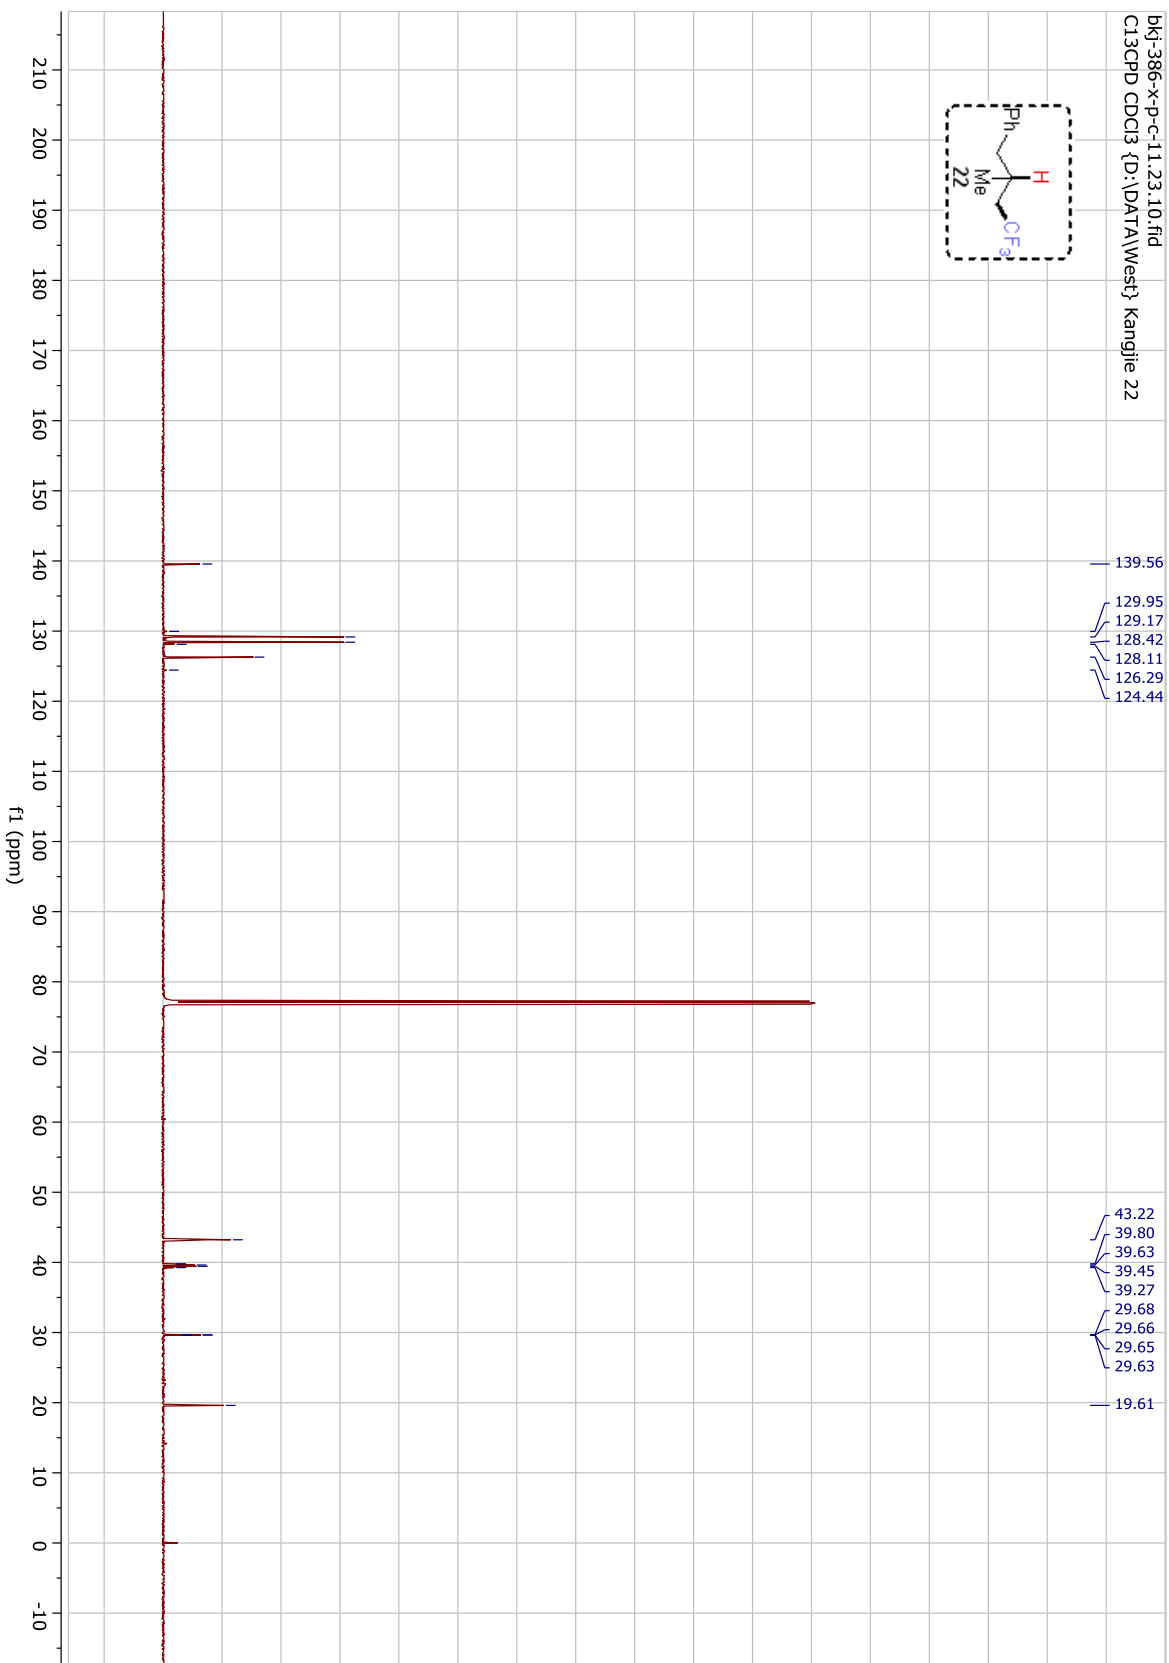

bkj-386-x-p-f-11.23.10.fid  
F19\_baseline\_correct 1D  
F19\_baseline\_correct CDC13 {D:\DATA\West\ Kangjie 22

63.09  
63.11  
63.13

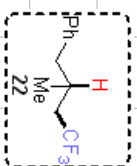

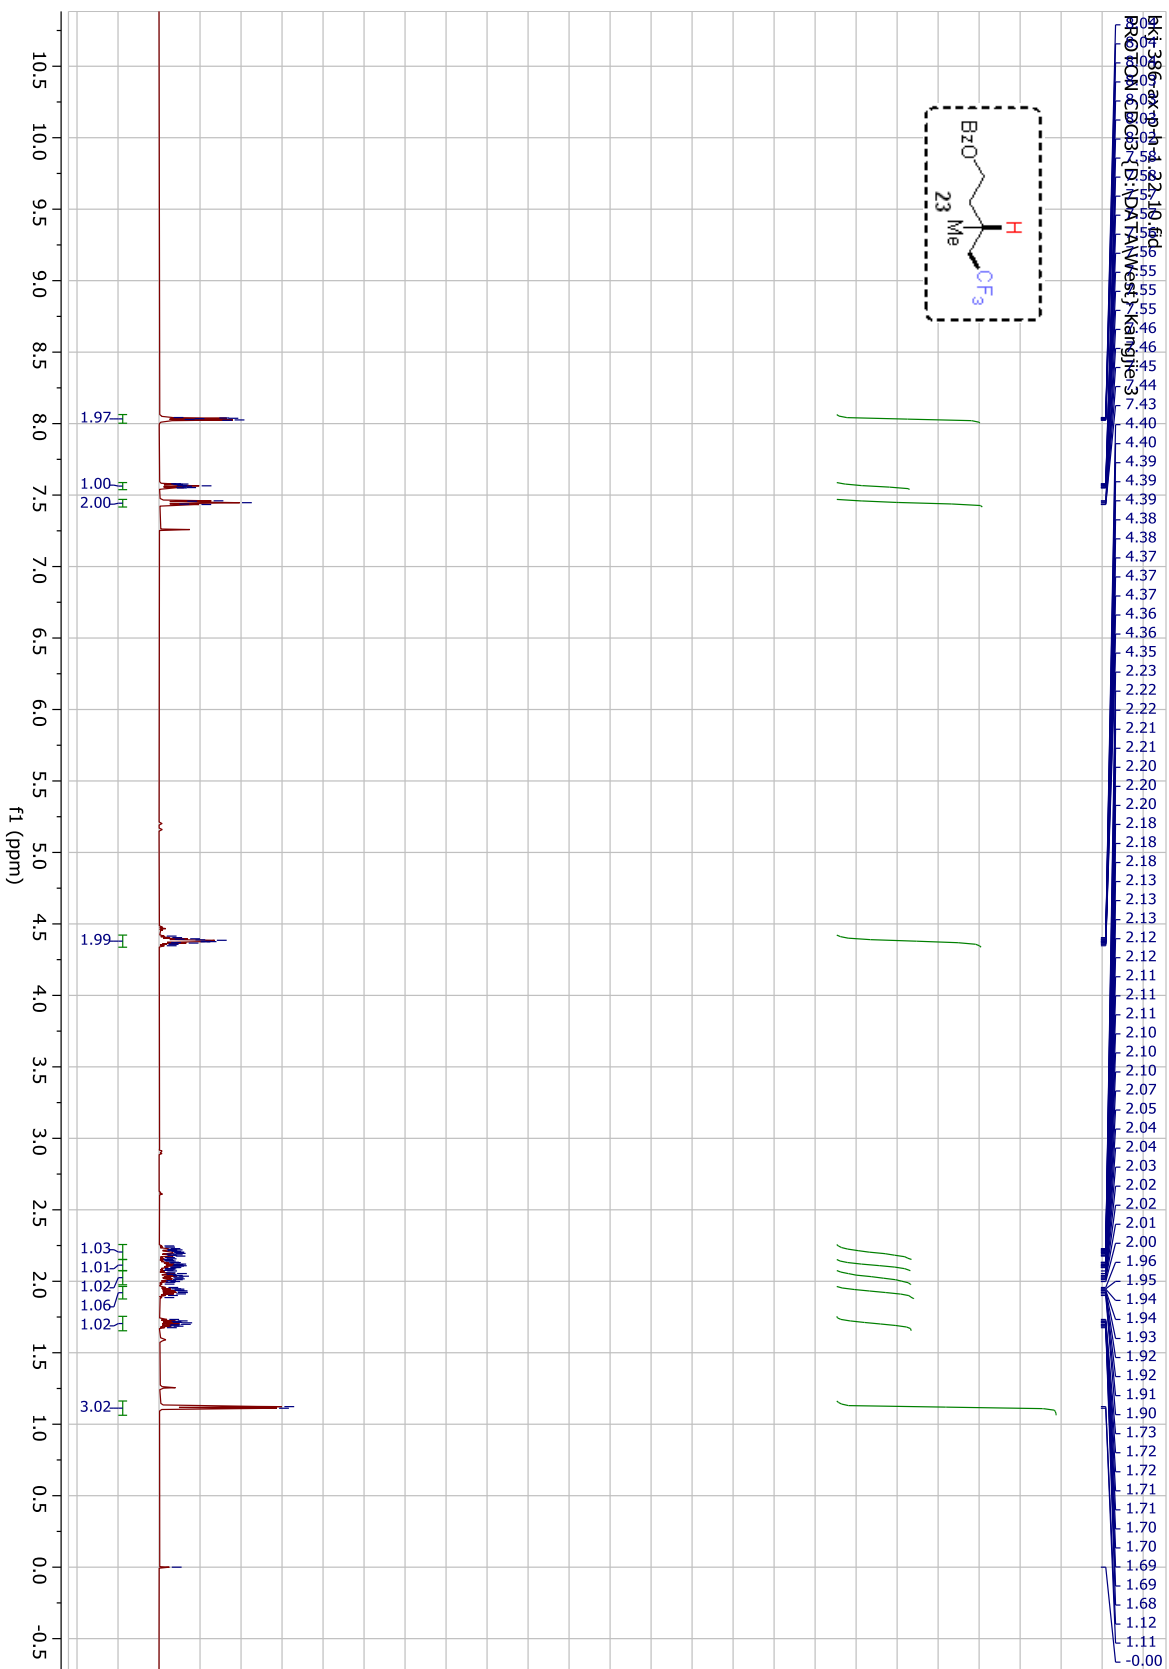

bkj-386-ax-p-c-1.23.10.fid  
C13CPD CDCl3 (D:\DATA\Westj Kangjil) 17

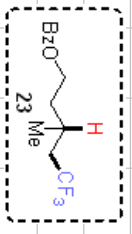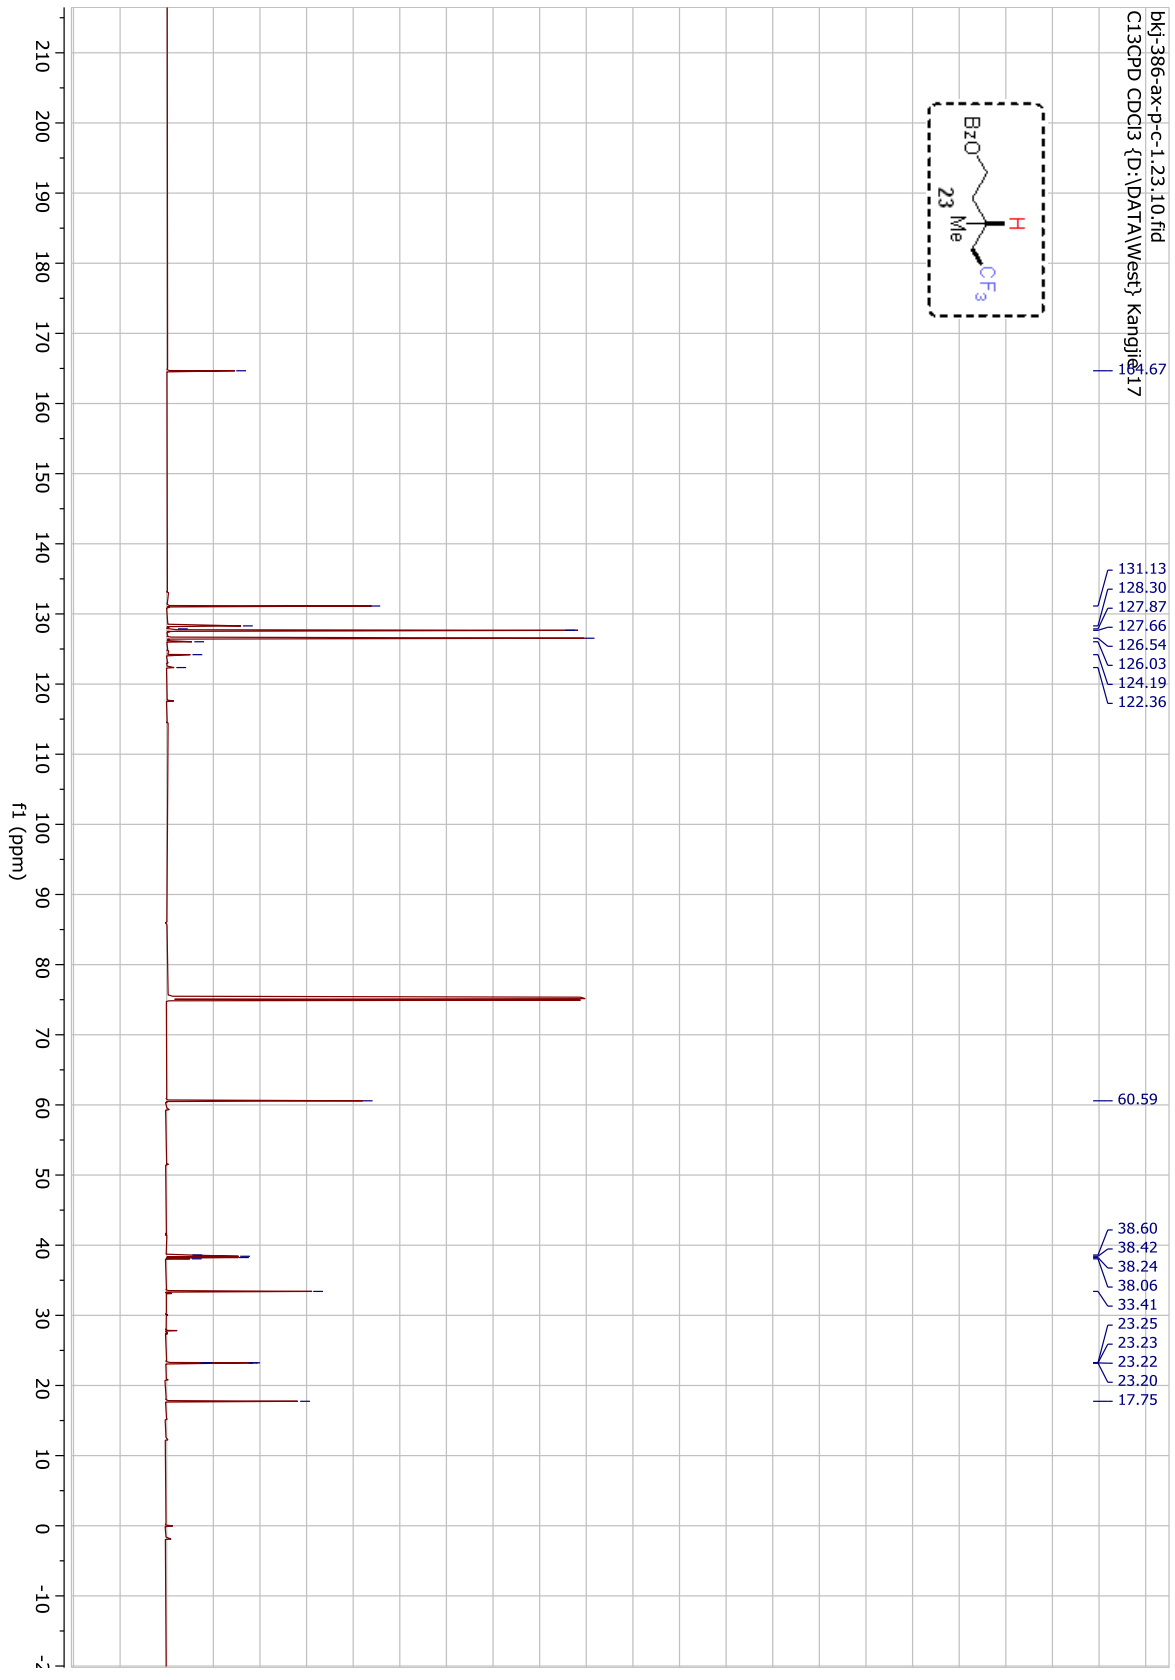

bkt-386-ax-p-h-1.22.11.fid  
F19\_baseline\_correct ID  
F19\_baseline\_correct CDC13 {D:\DATA\West} Kangjie 3

63.28  
63.30  
63.32

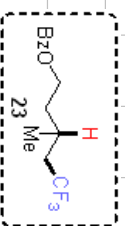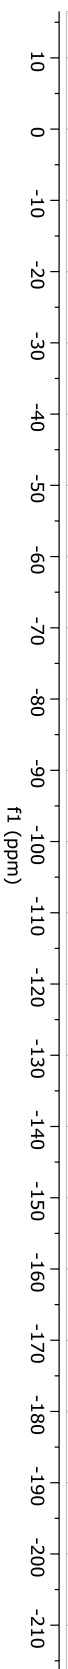





hkl-386-am-mix-p-1.1.11.fid  
C13CPD CDCl3\_3mm\_tubes {D:\DATA\MSF\Kangjie 2

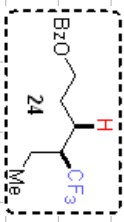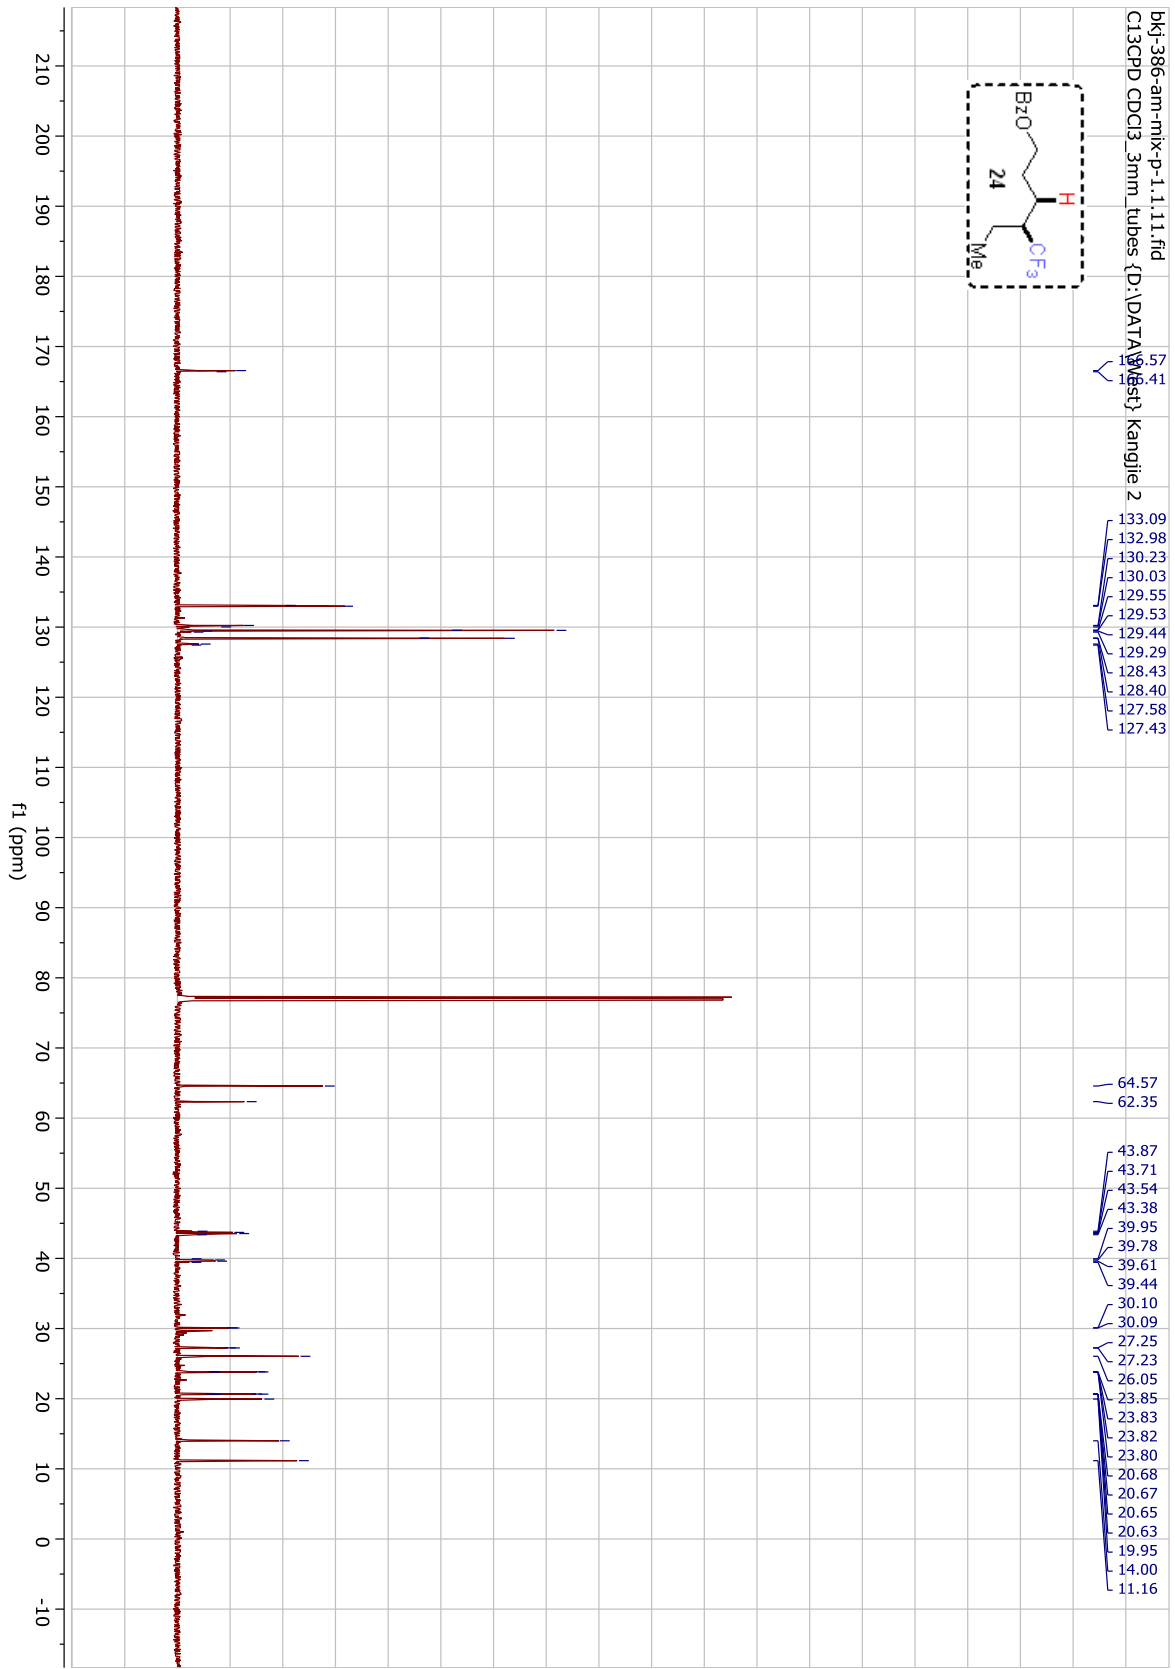

bkj-386-am-mix-p-1.1.12.fid  
F19\_baseline\_correct ID  
F19\_baseline\_correct CDCl3\_3mm\_tubes {D:\DATA\West} Kangjie  
-69.84  
-69.85  
-70.49  
-70.51

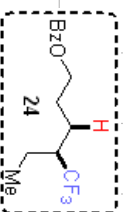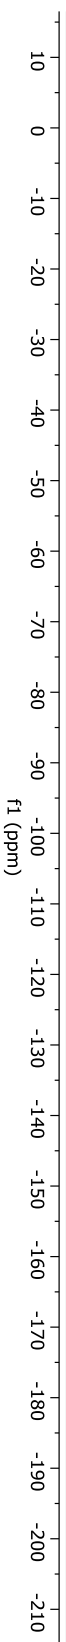

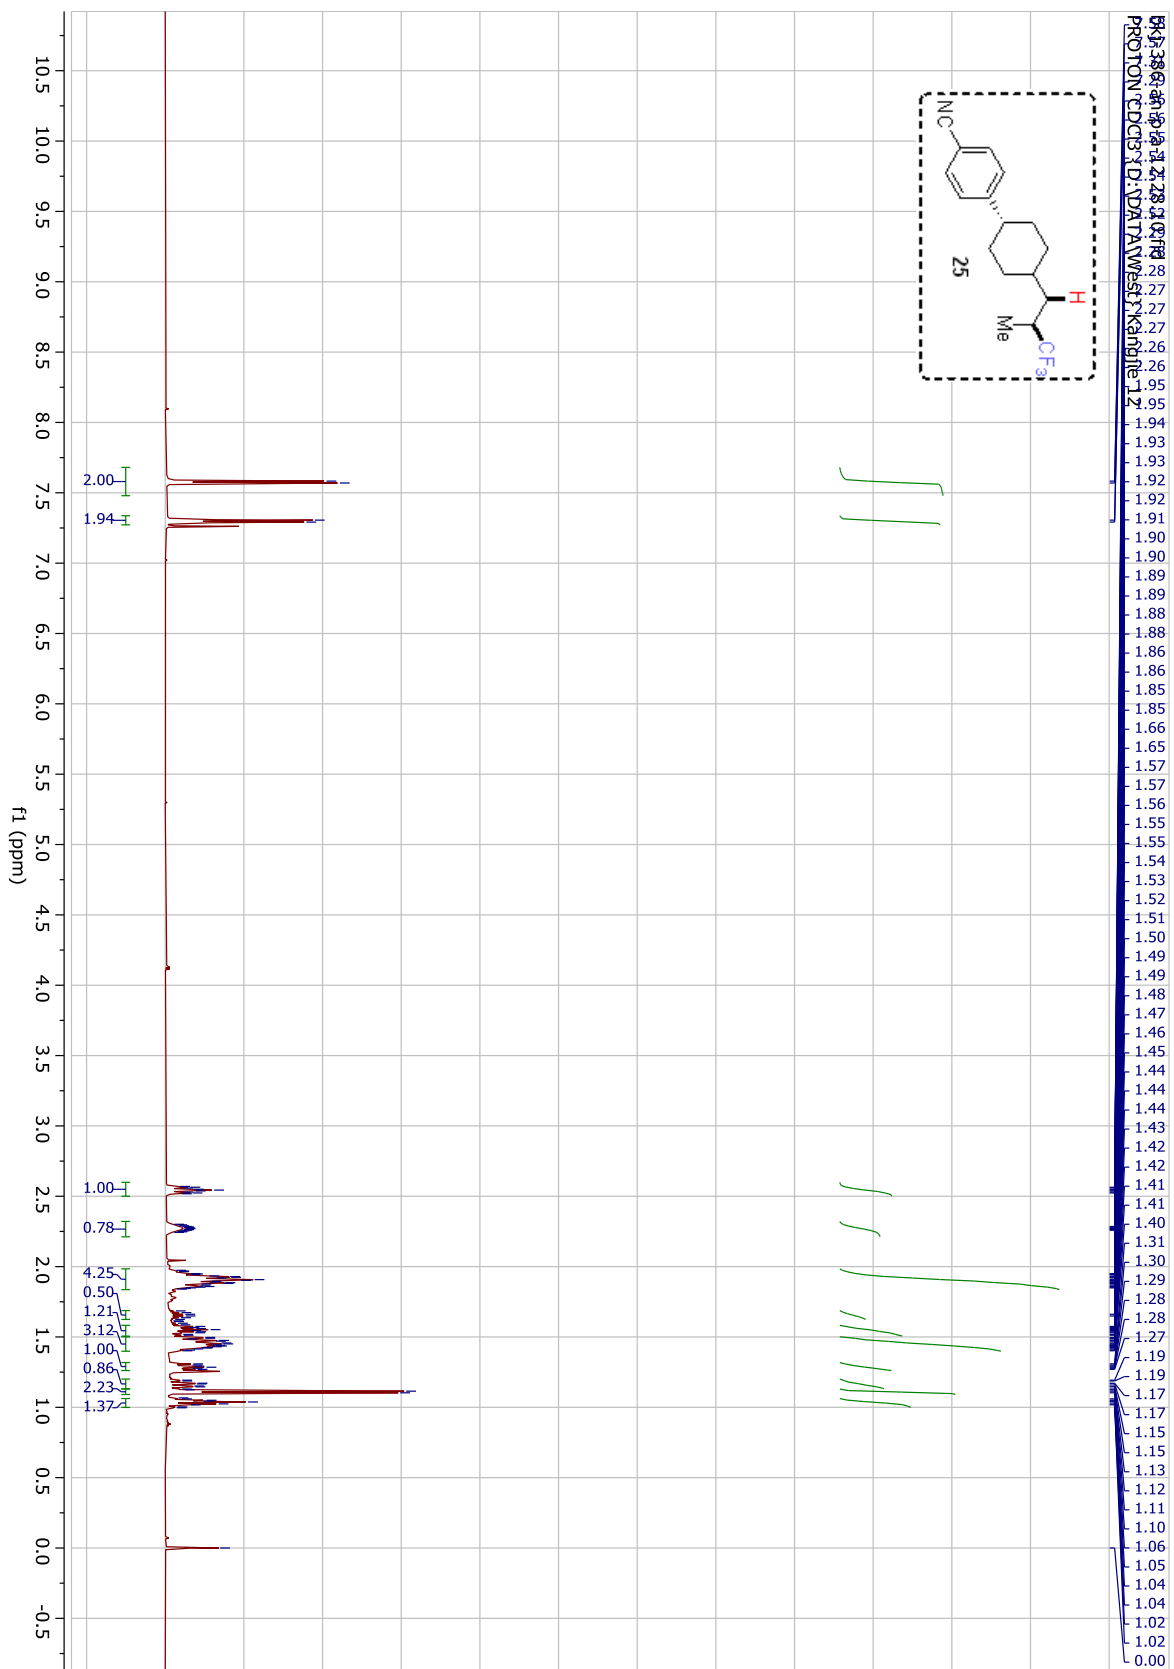

bjf-386-an-p-a-12.28.11.fid  
C13CPD CDCl3 (D:\DATA\Westj Kangjle 12

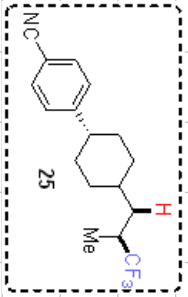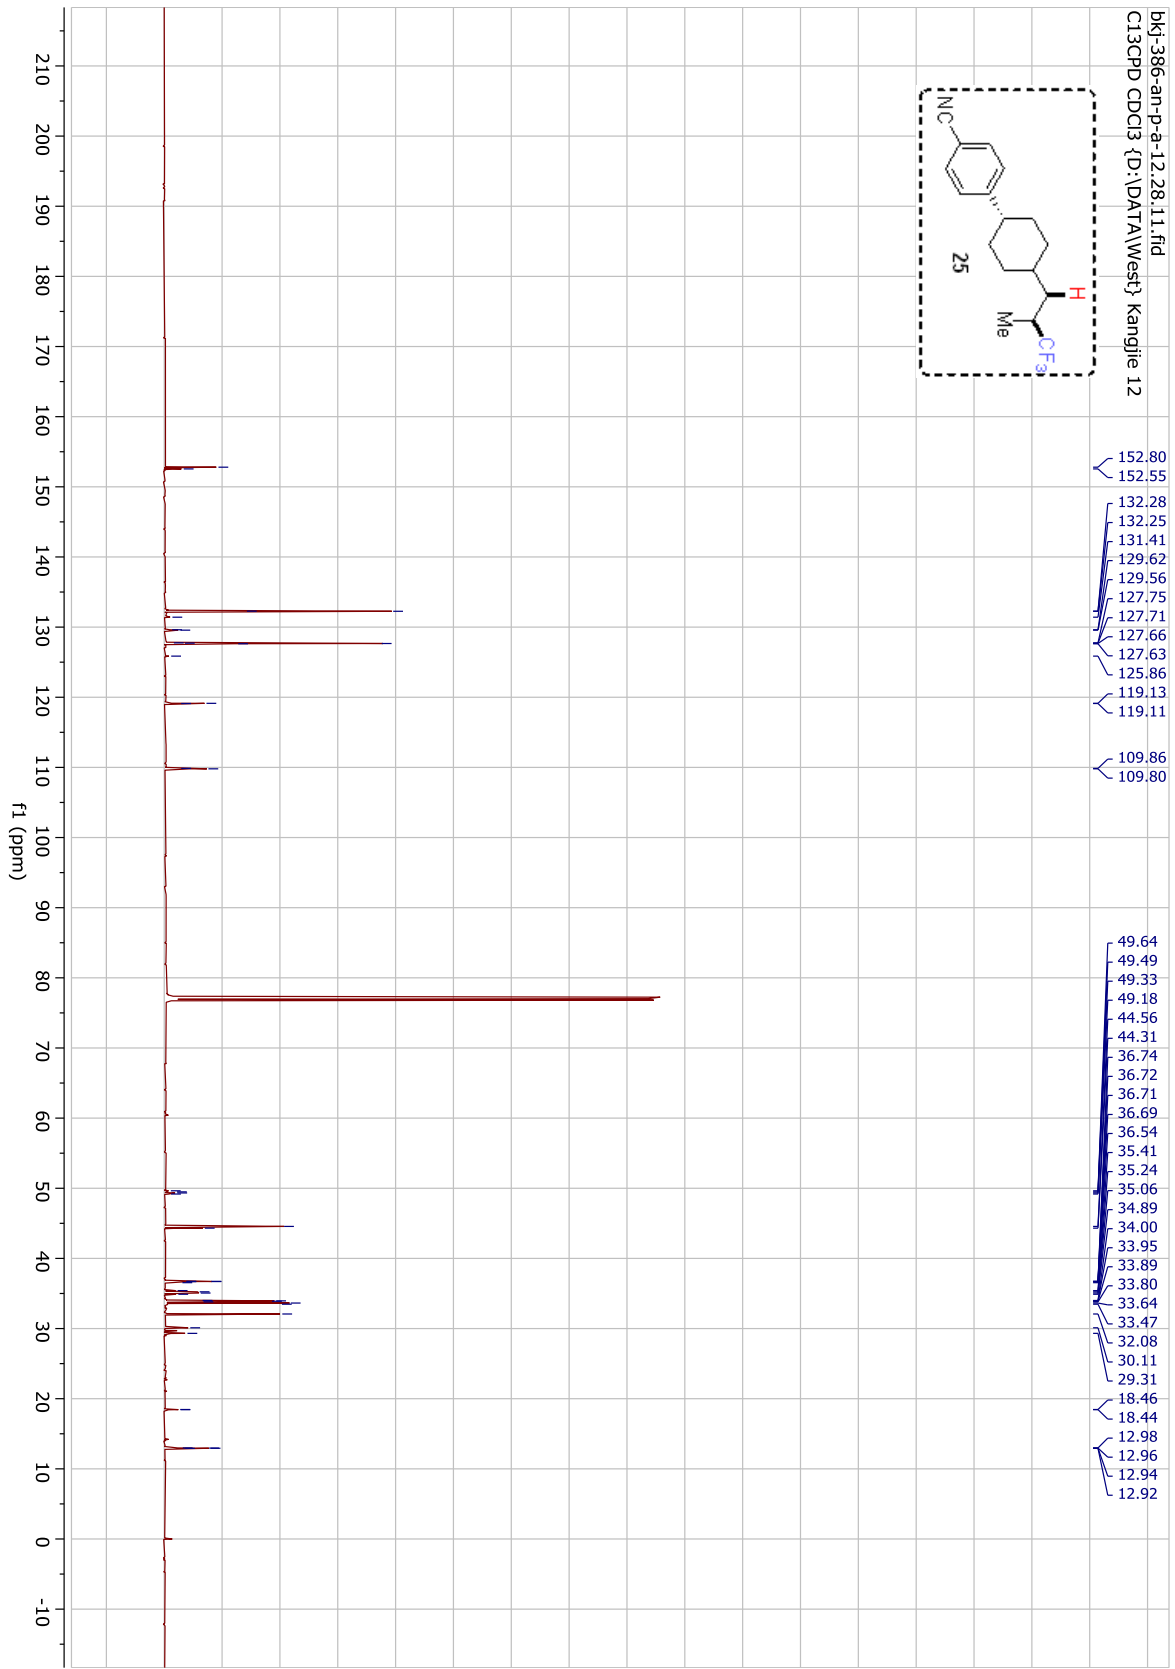

bkj-386-an-p-a-12.28.12.fid  
F19\_baseline\_correct ID  
F19\_baseline\_correct CDCl3 {D:\DATA\West\ Kangjie 12

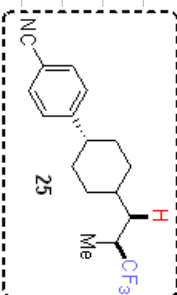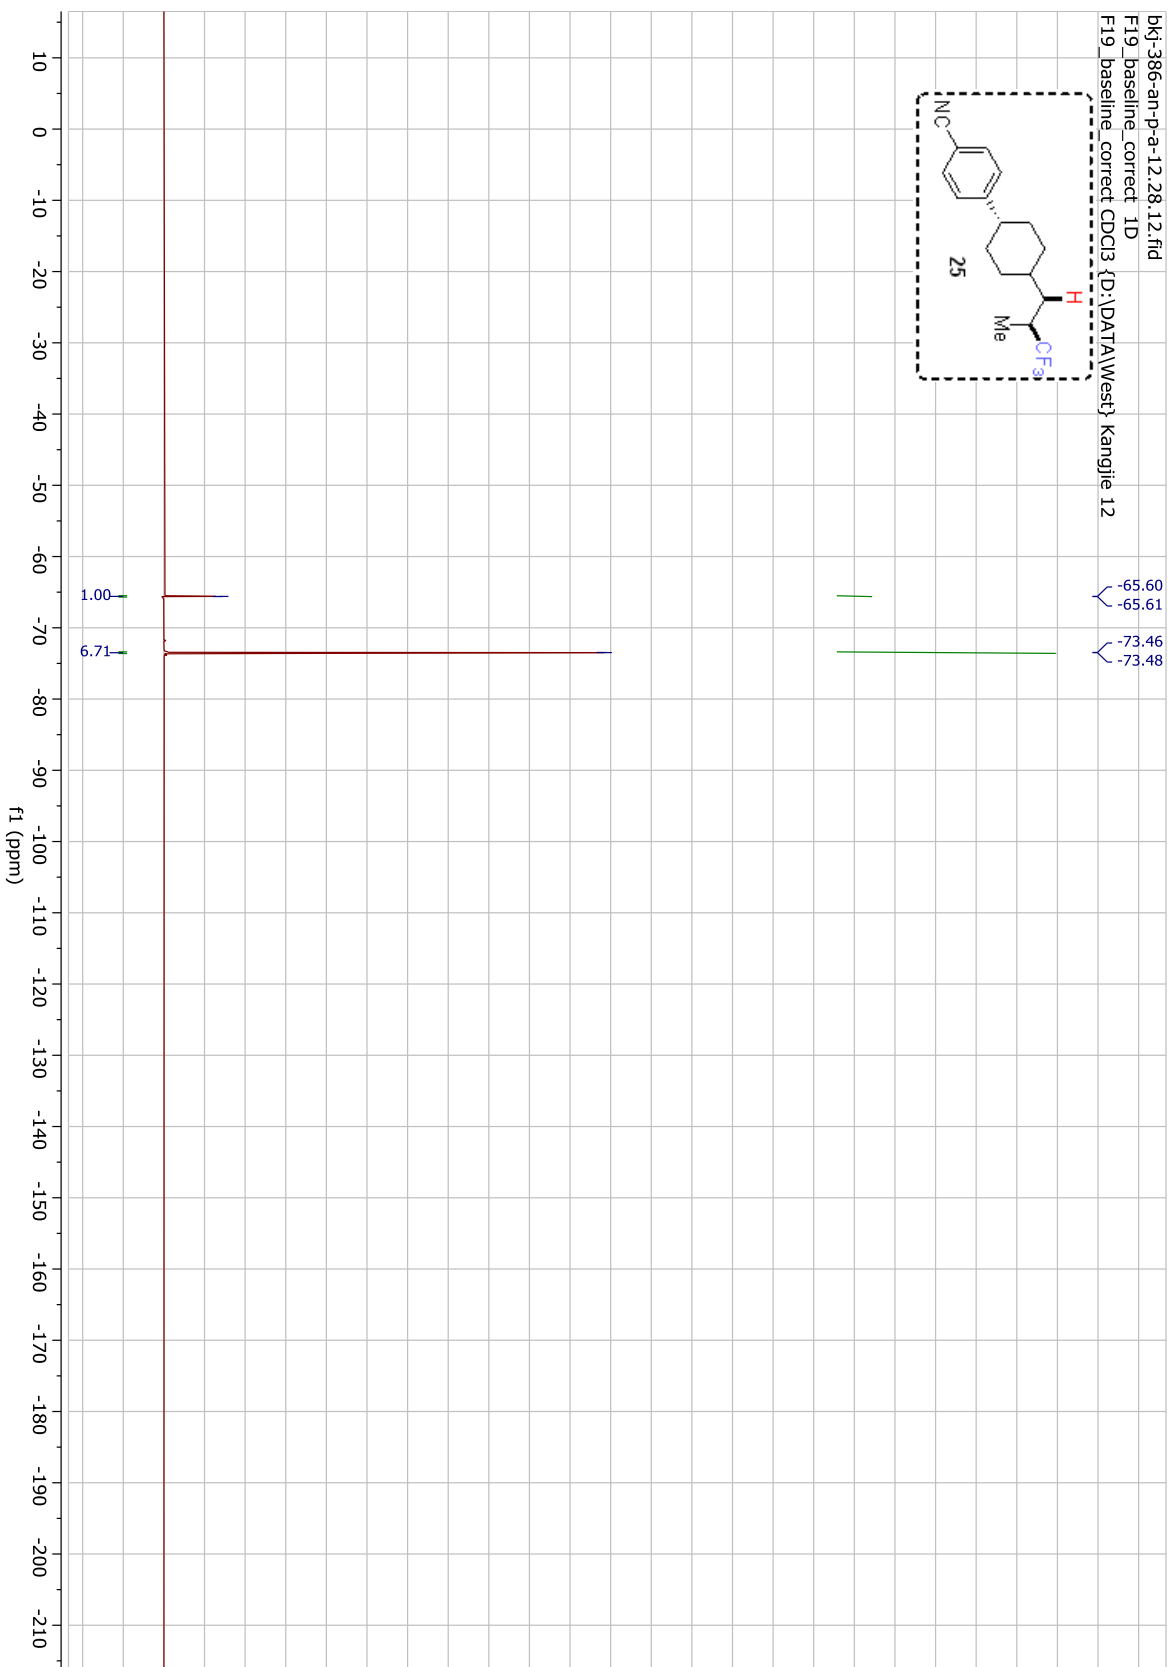

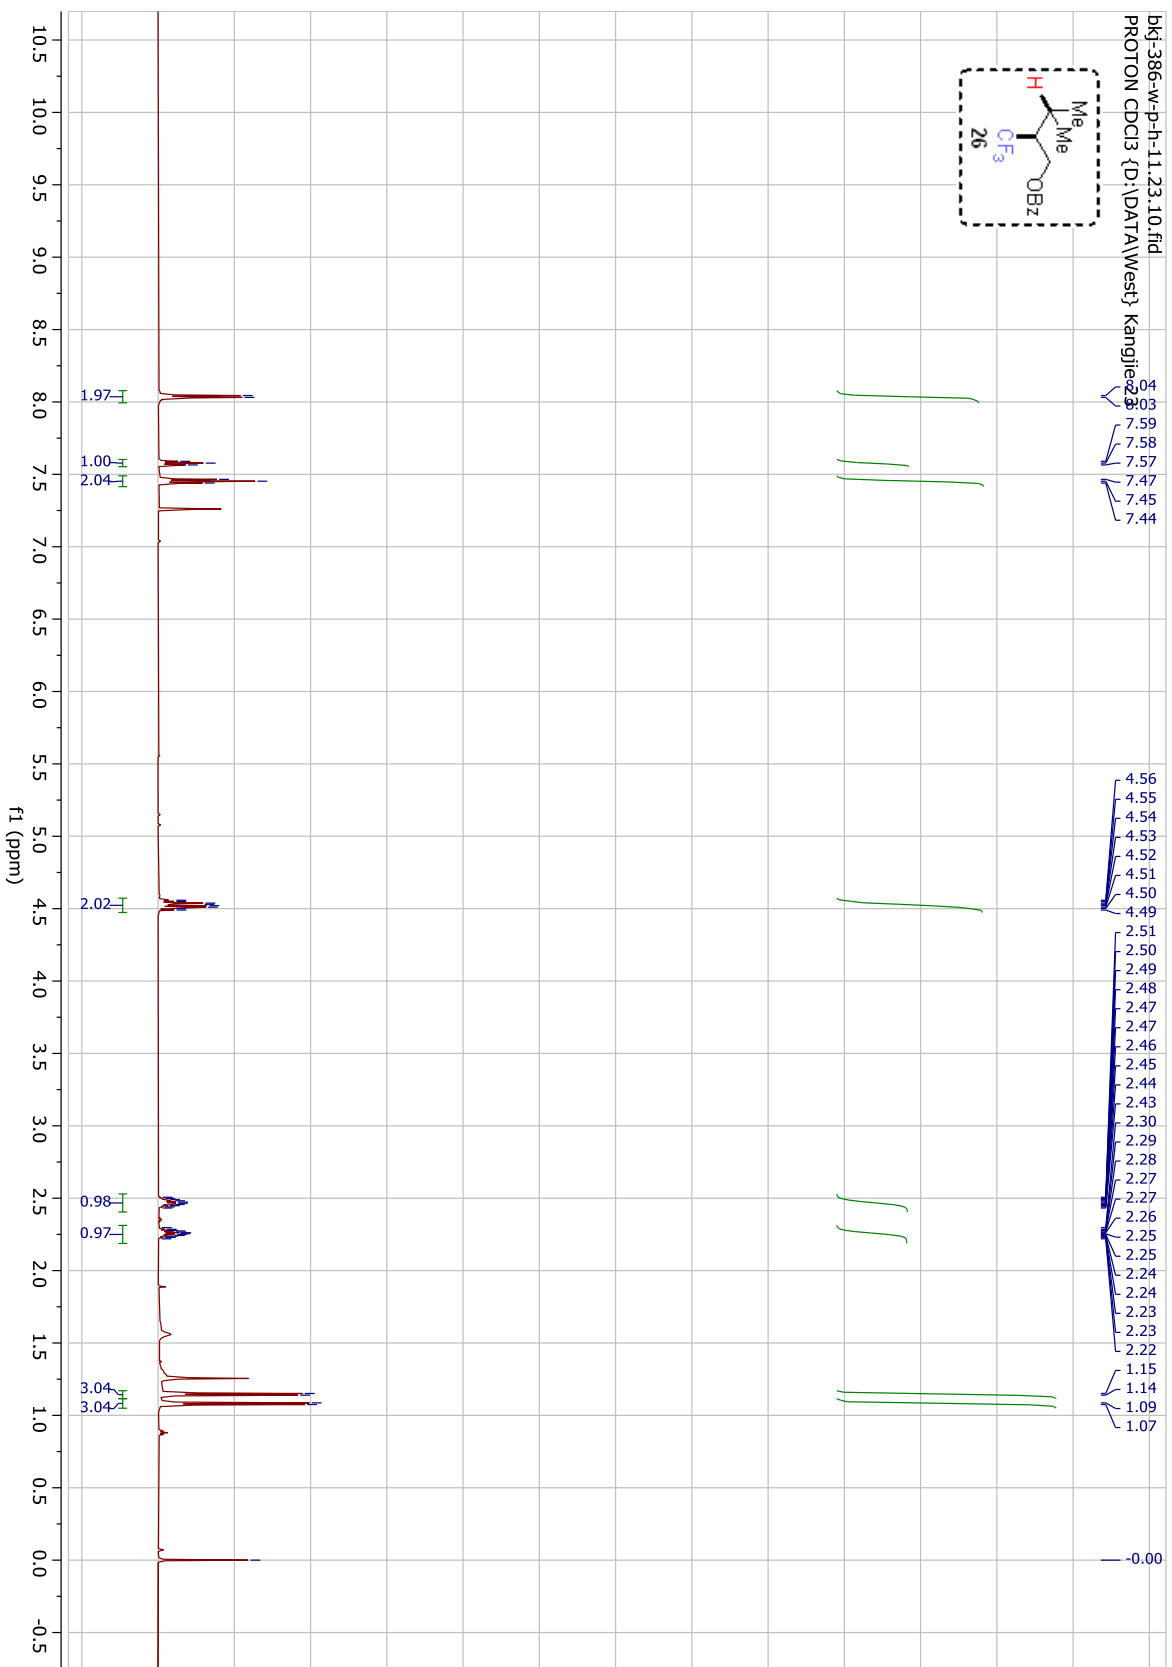

bjf-386-w-p-c-11.23.10.fid  
C13CPD CDCl3 (D:\DATAWestfj Kangjief23

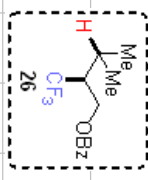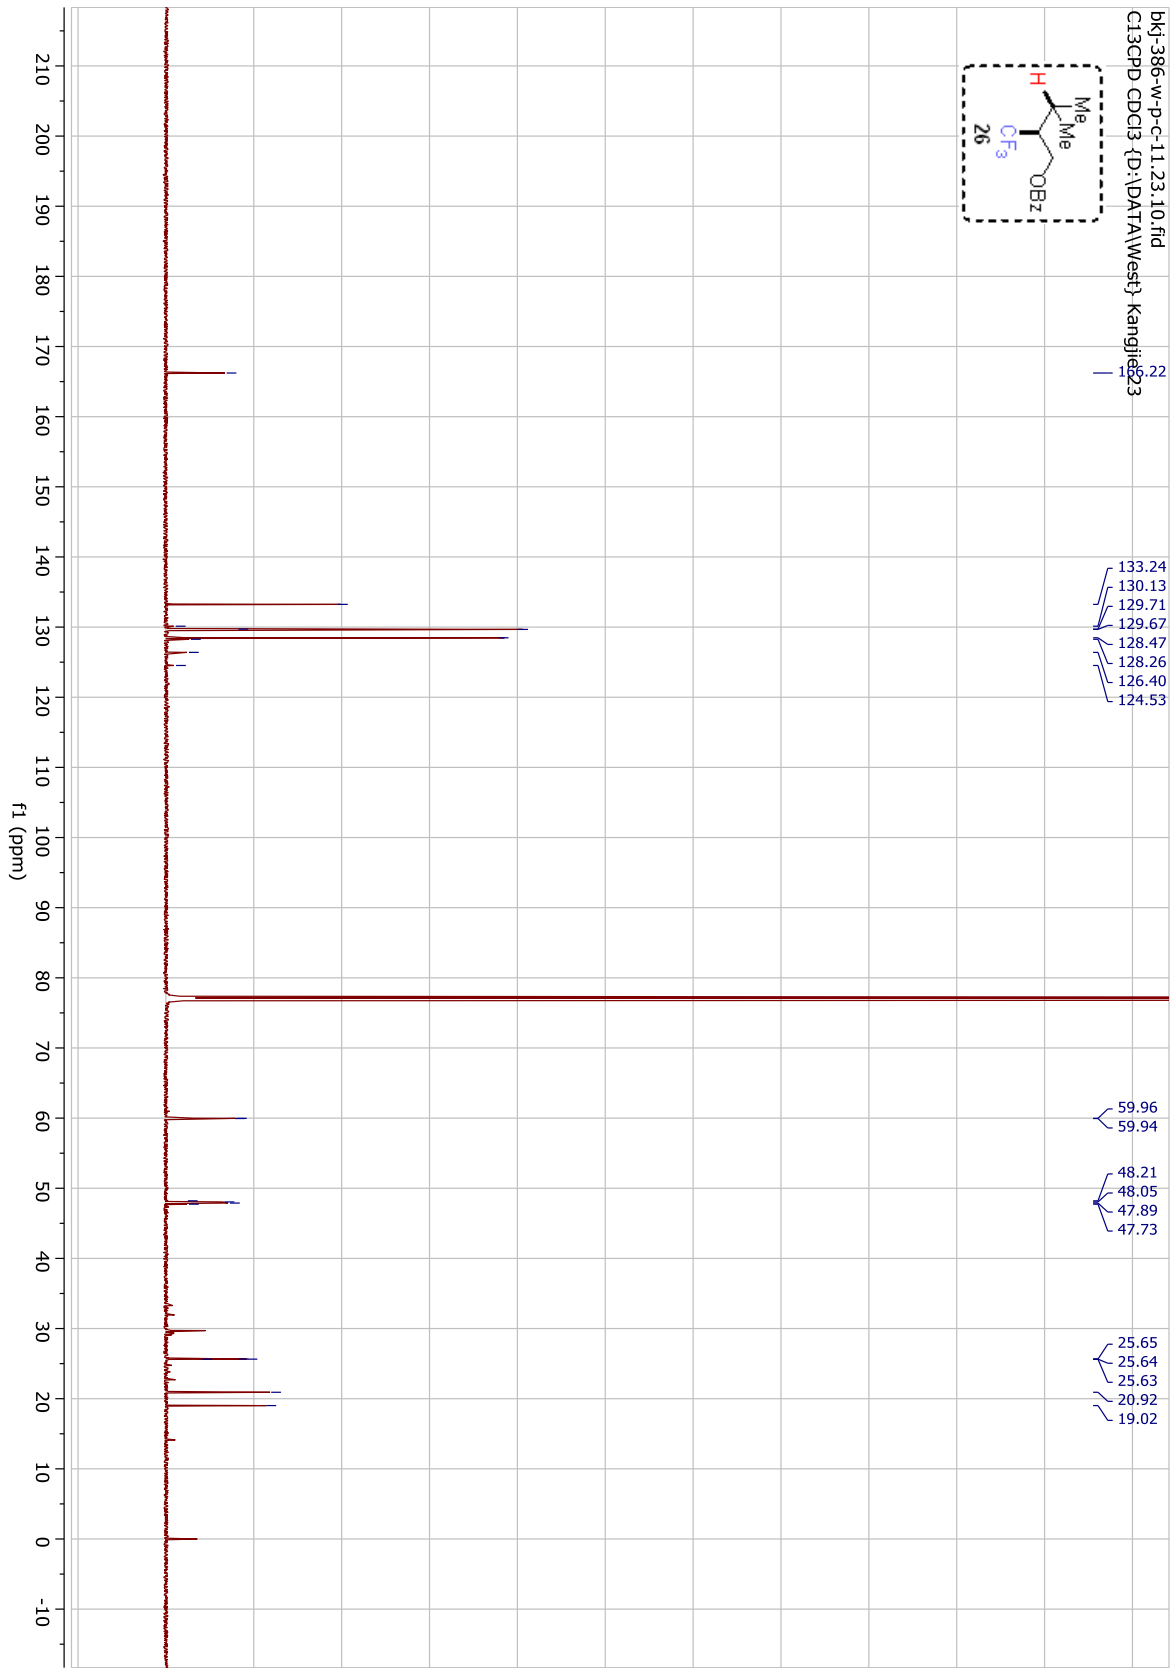



bkj-386-w-p-f-11.23.10.ftd  
F19\_baseline\_correct ID  
F19\_baseline\_correct FIDC13 {D:\DATA\West} Kangjie 23

-65.98  
-65.99

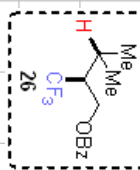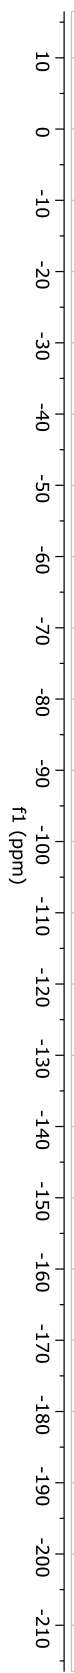

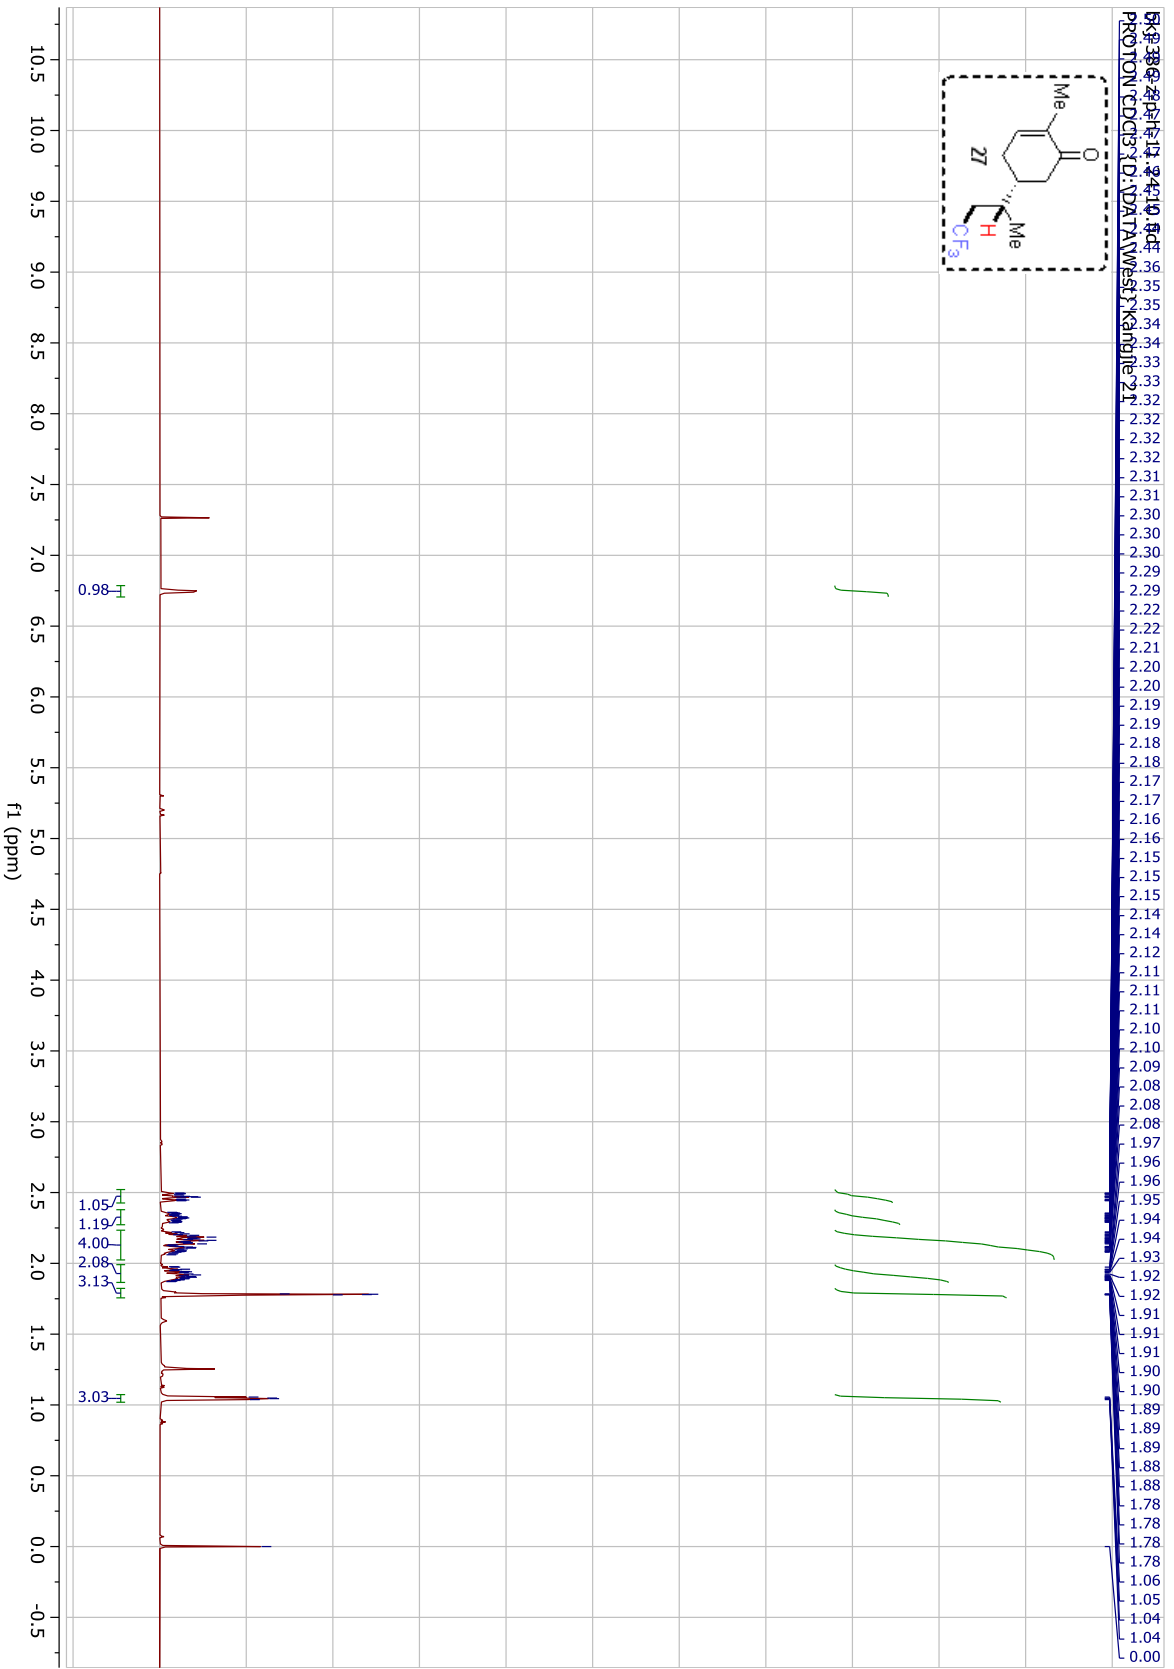

hkl-386-z-p-11-24-12.fid  
C13CPD CDCl3 24.12.12

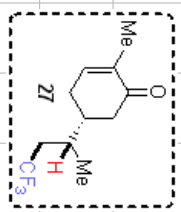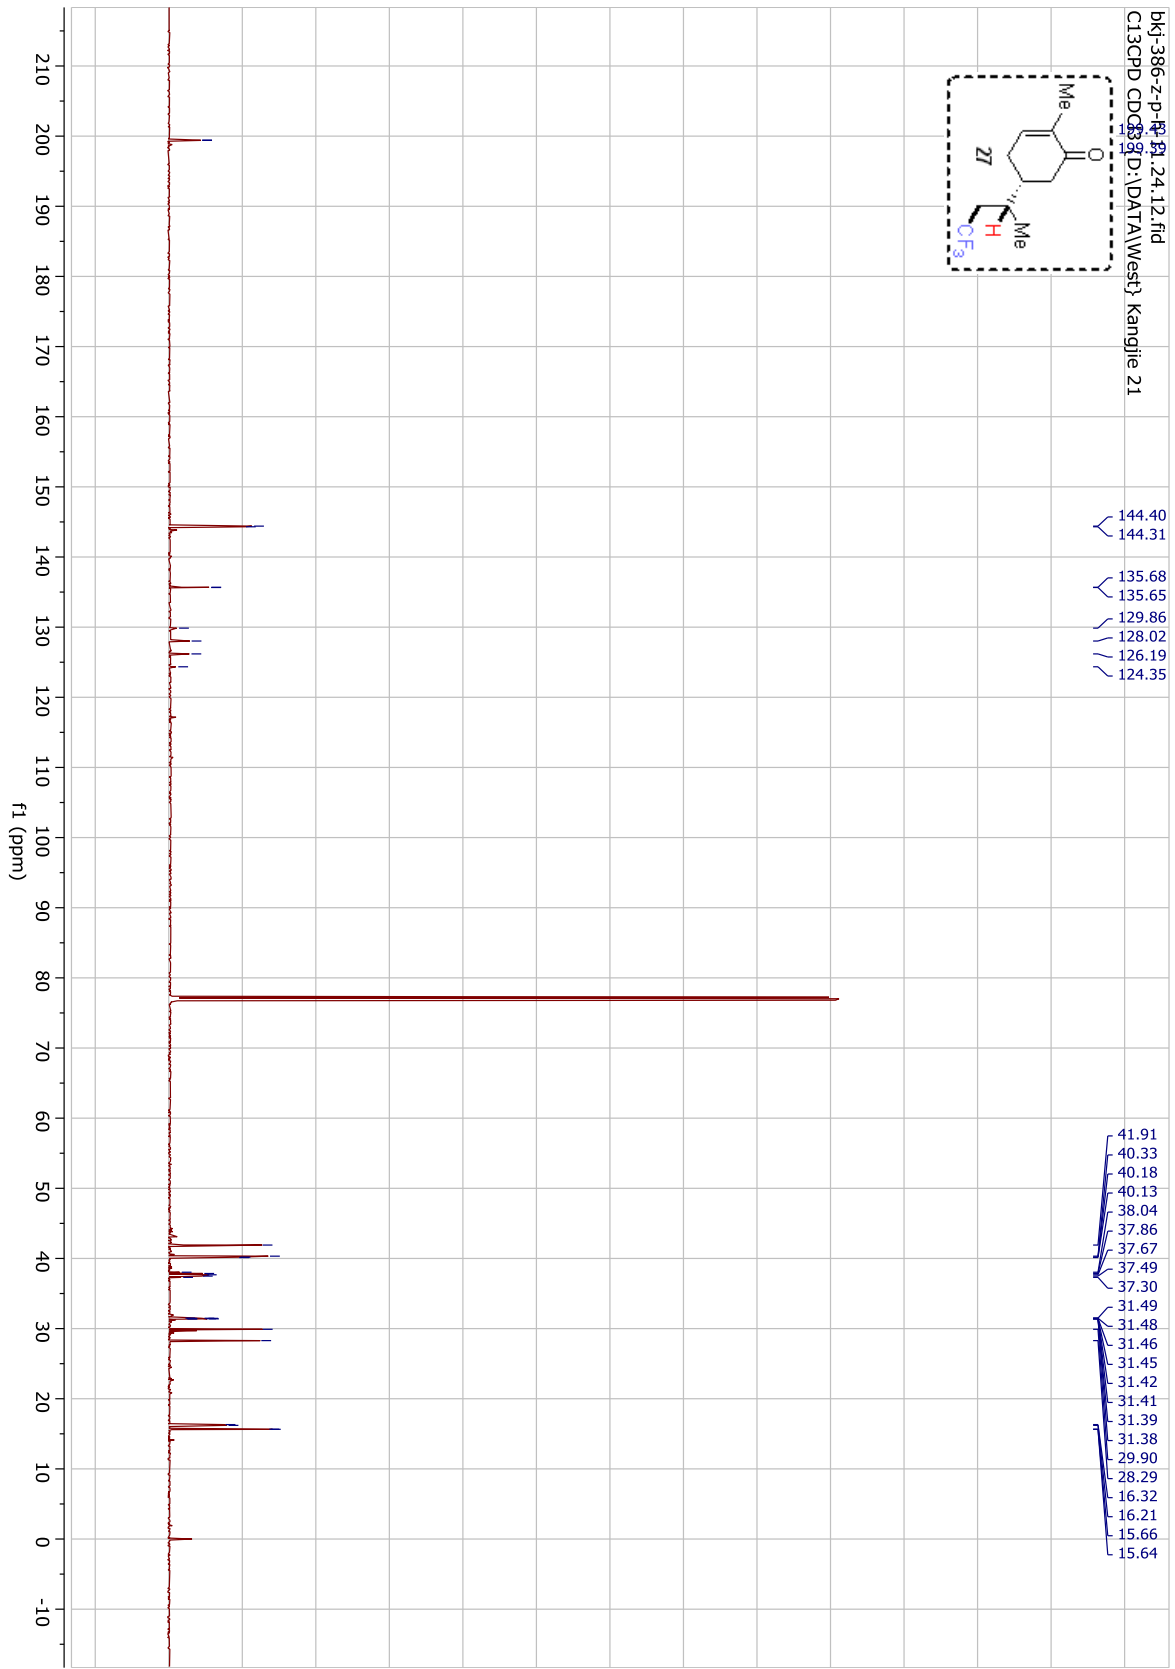

bkj-386-z-p-h-11.24.11.fid  
F19\_baseline\_correct ID

D:\DATA\West\ Kangjie 21

63.51  
63.52  
63.52  
63.54  
63.54  
63.55

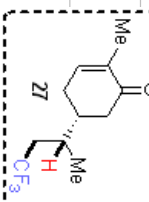

bk1-393-p-p-1.5.10.fid  
PROTON CDCl3 {D:\DATA\West\Kangjie 21

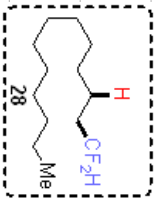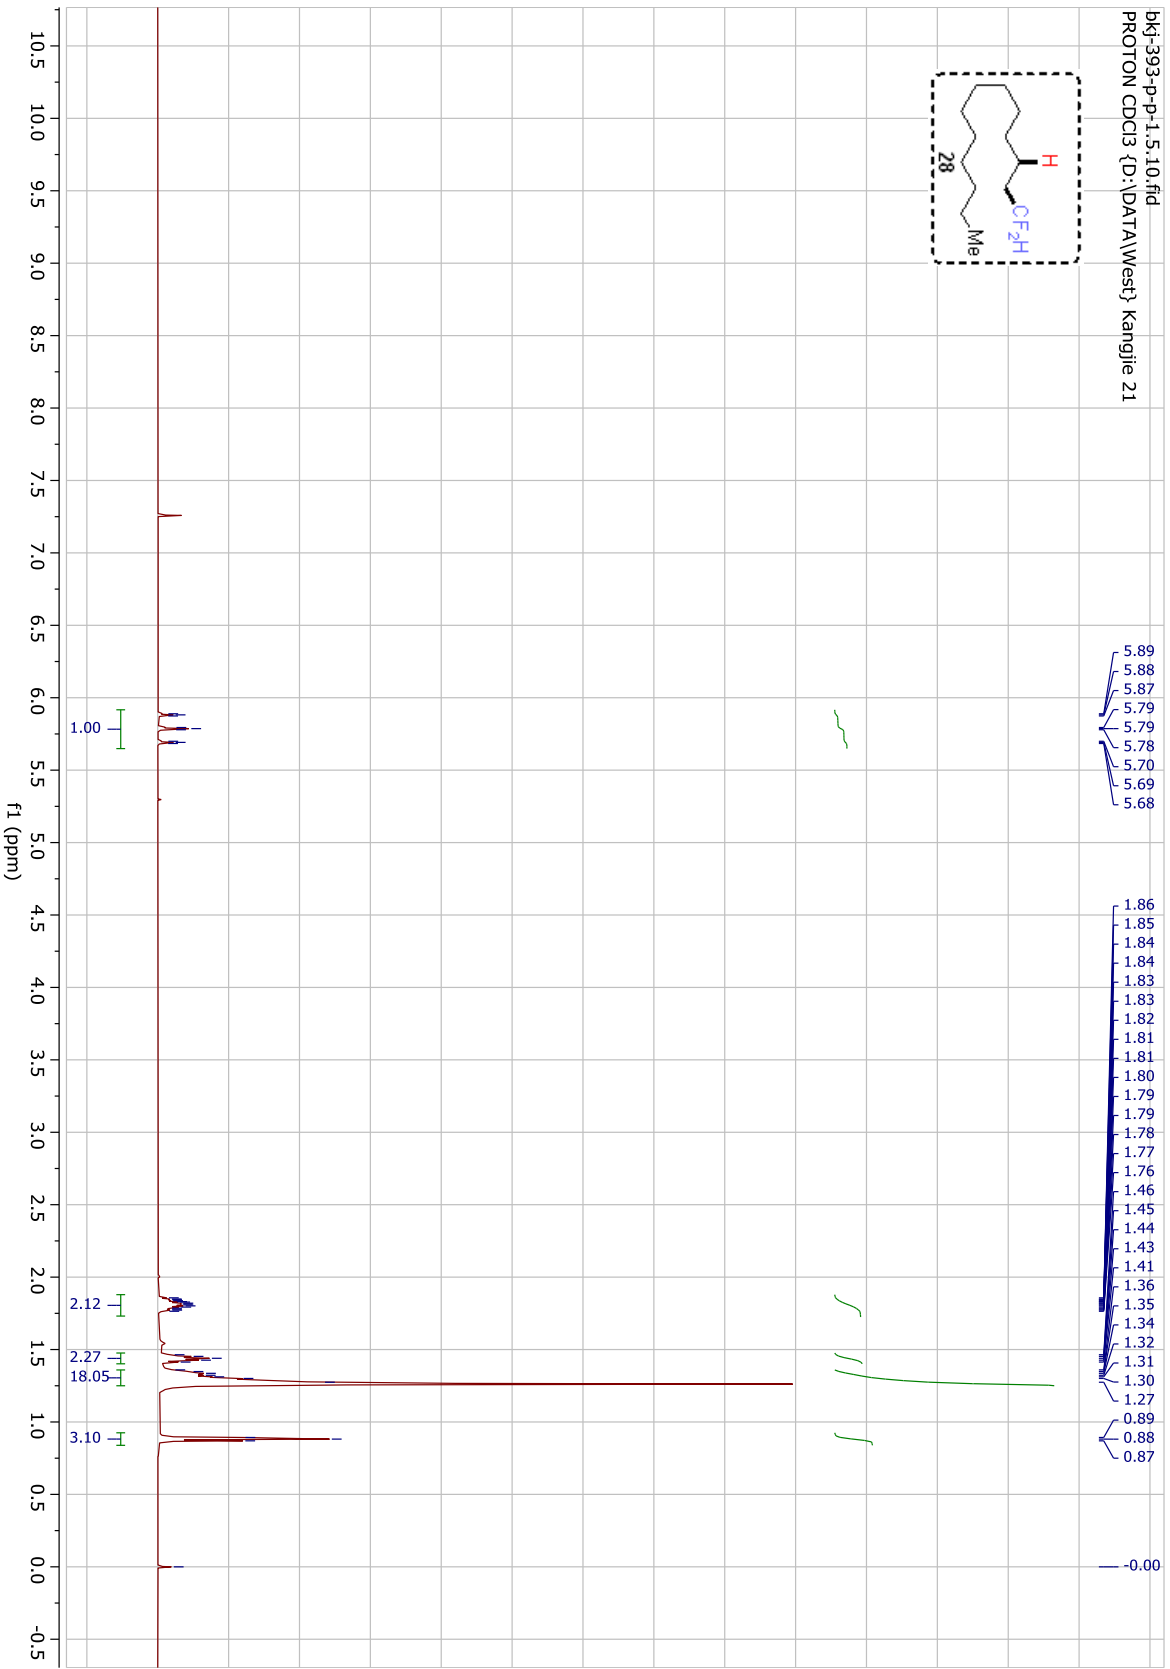

bkt-393-p-p-1,5,11.fid  
C13CPD CDCl3 (D:\DATAWest\ Kangjie 21

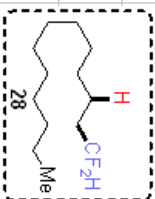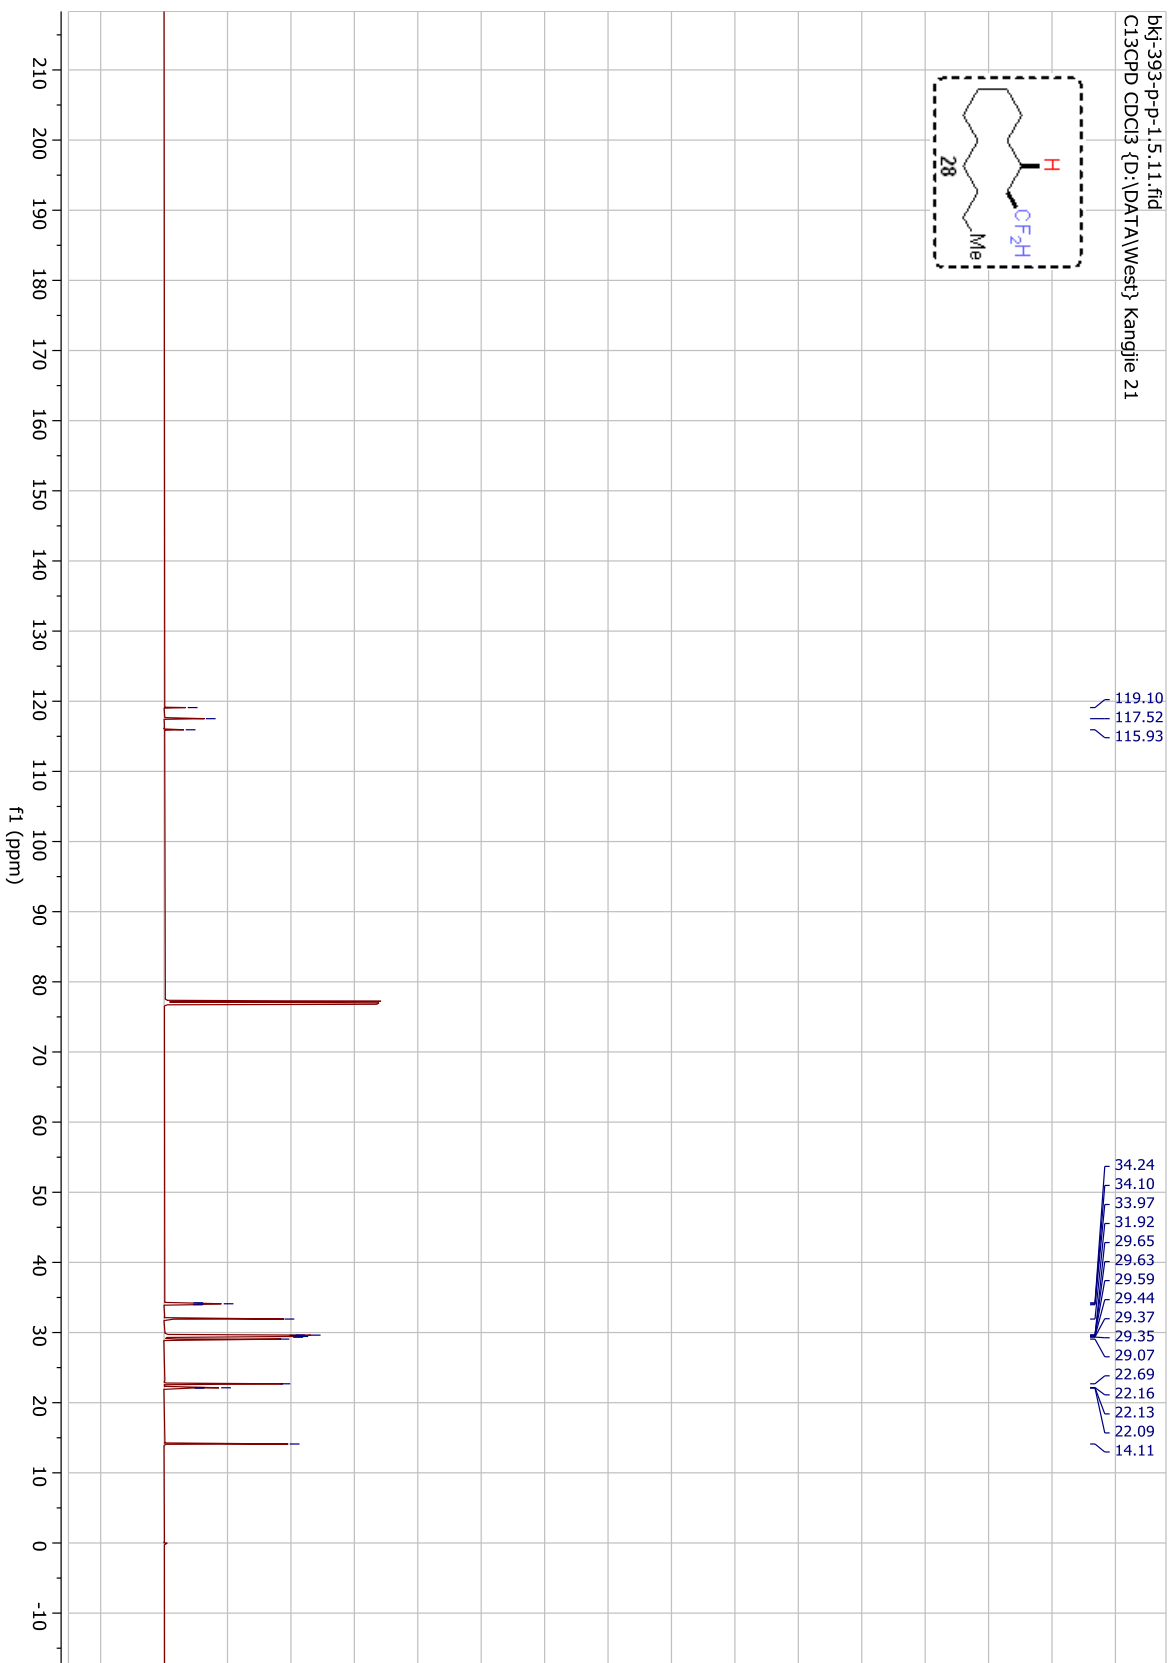

bkj-393-p-p-1.5.12.fid  
F19\_baseline\_correct ID  
F19\_baseline\_correct CDCI3 {D:\DATA\West} Kangjie 21

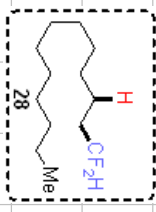

-115.65  
-115.68  
-115.71  
-115.75  
-115.78  
-115.81



160

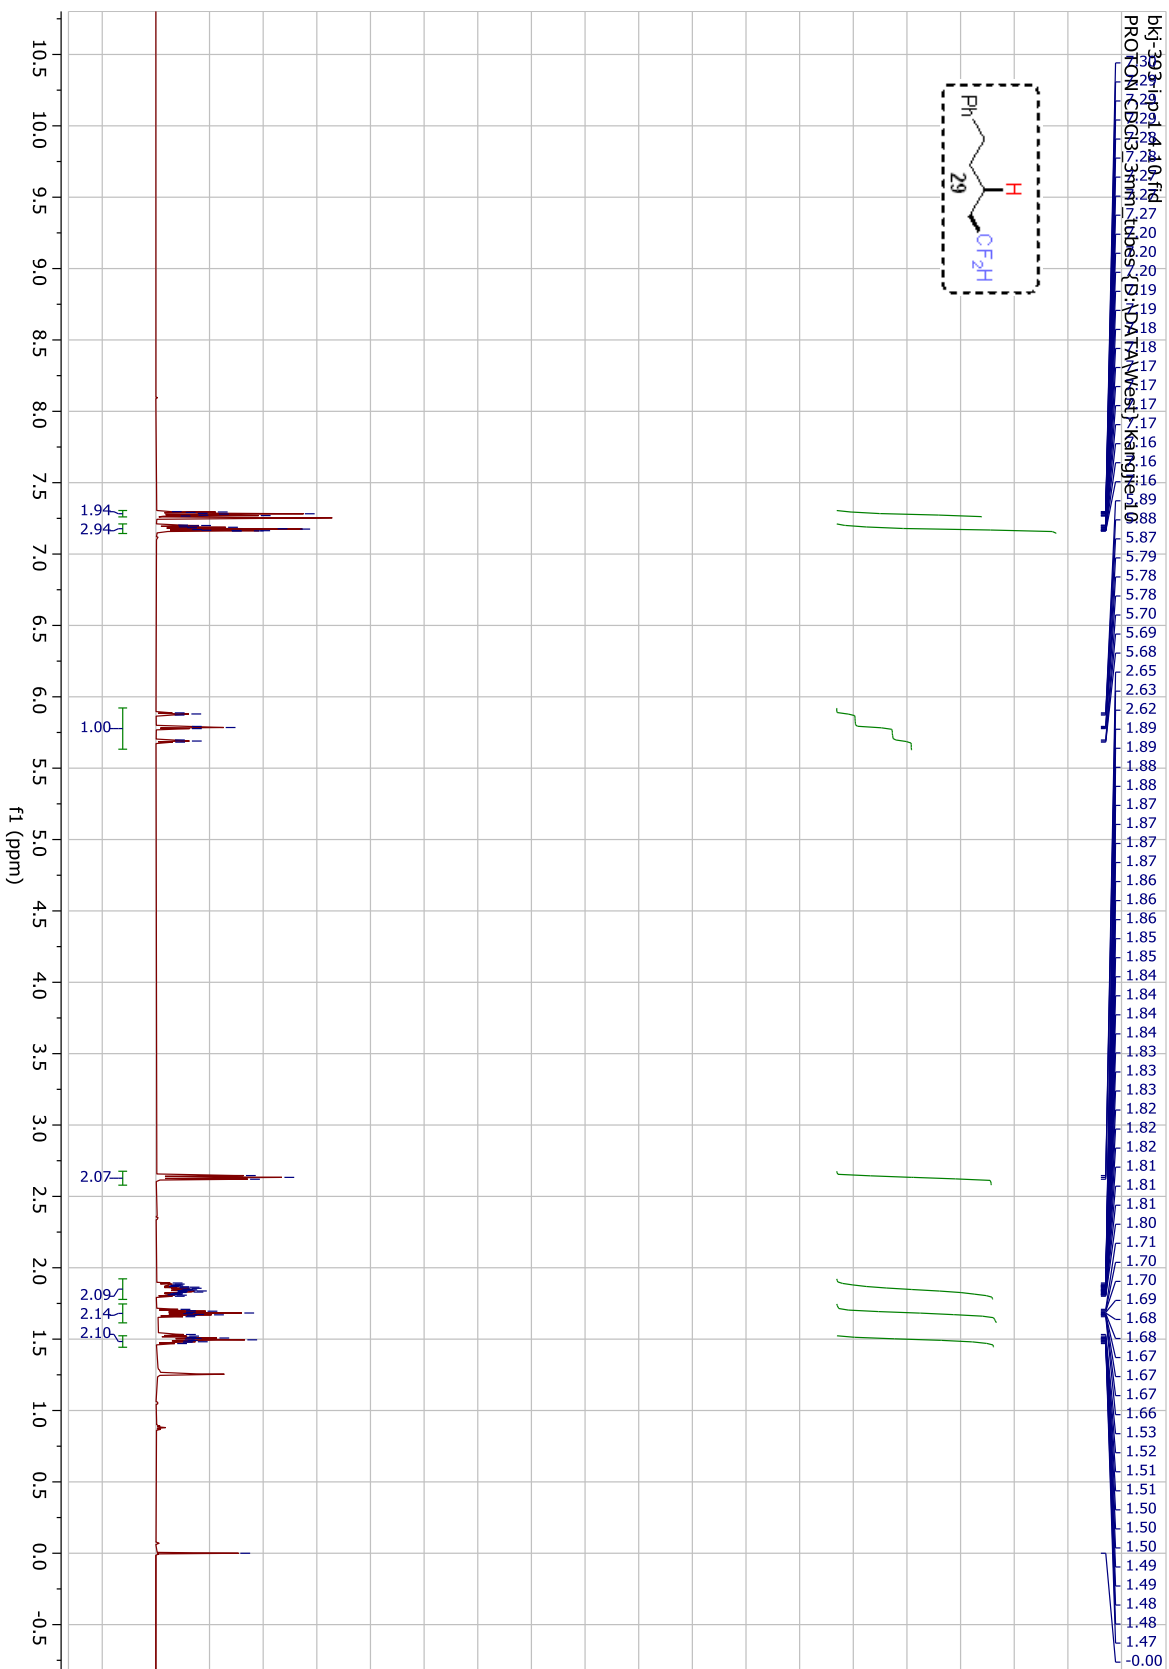



bk1-393-i-p-1.5.10.fid  
C13CPD CDCl3\_3mm\_tubes {D:\DATA\Westf\Kangjie 10

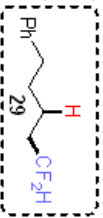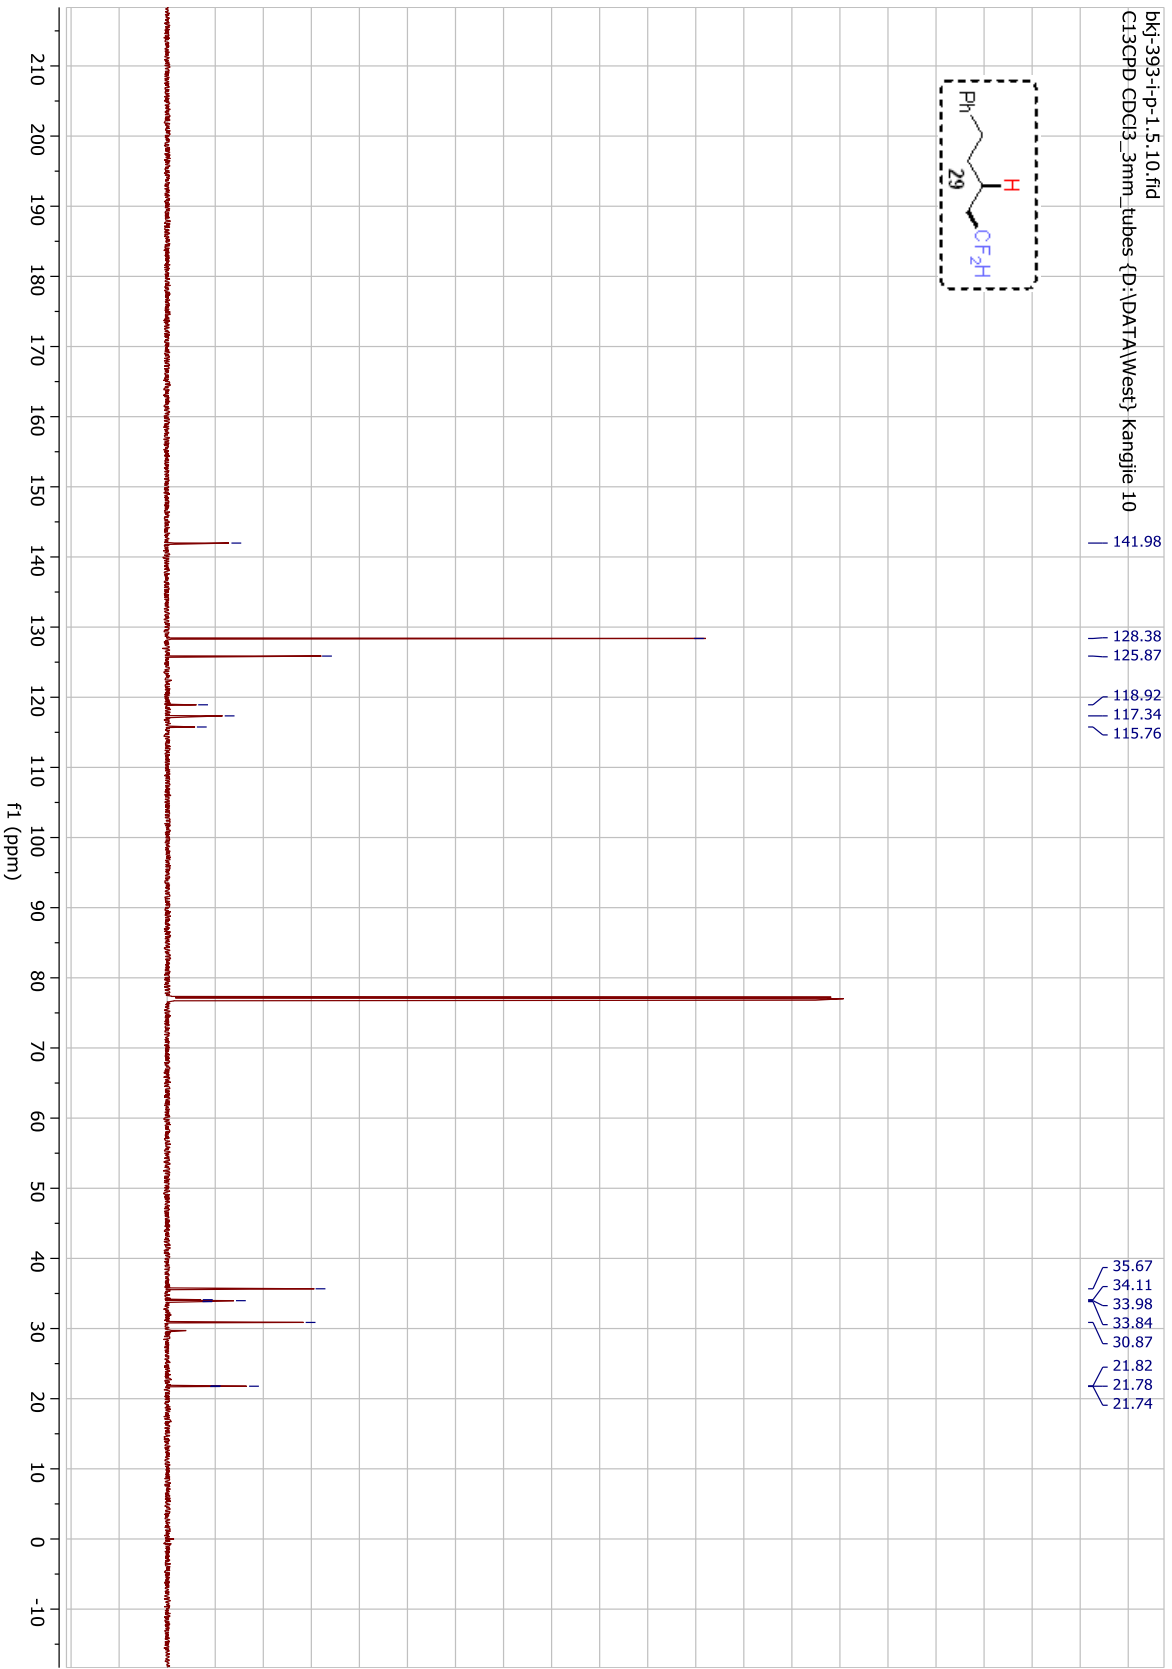

bkj-393-i-p-1.4.12.fid  
F19\_baseline\_correct ID  
F19\_baseline\_correct CDCl3\_3mm\_tubes {D:\DATA\West\ Kangjie 10

-115.64  
-115.67  
-115.70  
-115.74  
-115.77  
-115.80

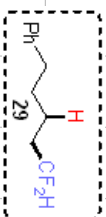

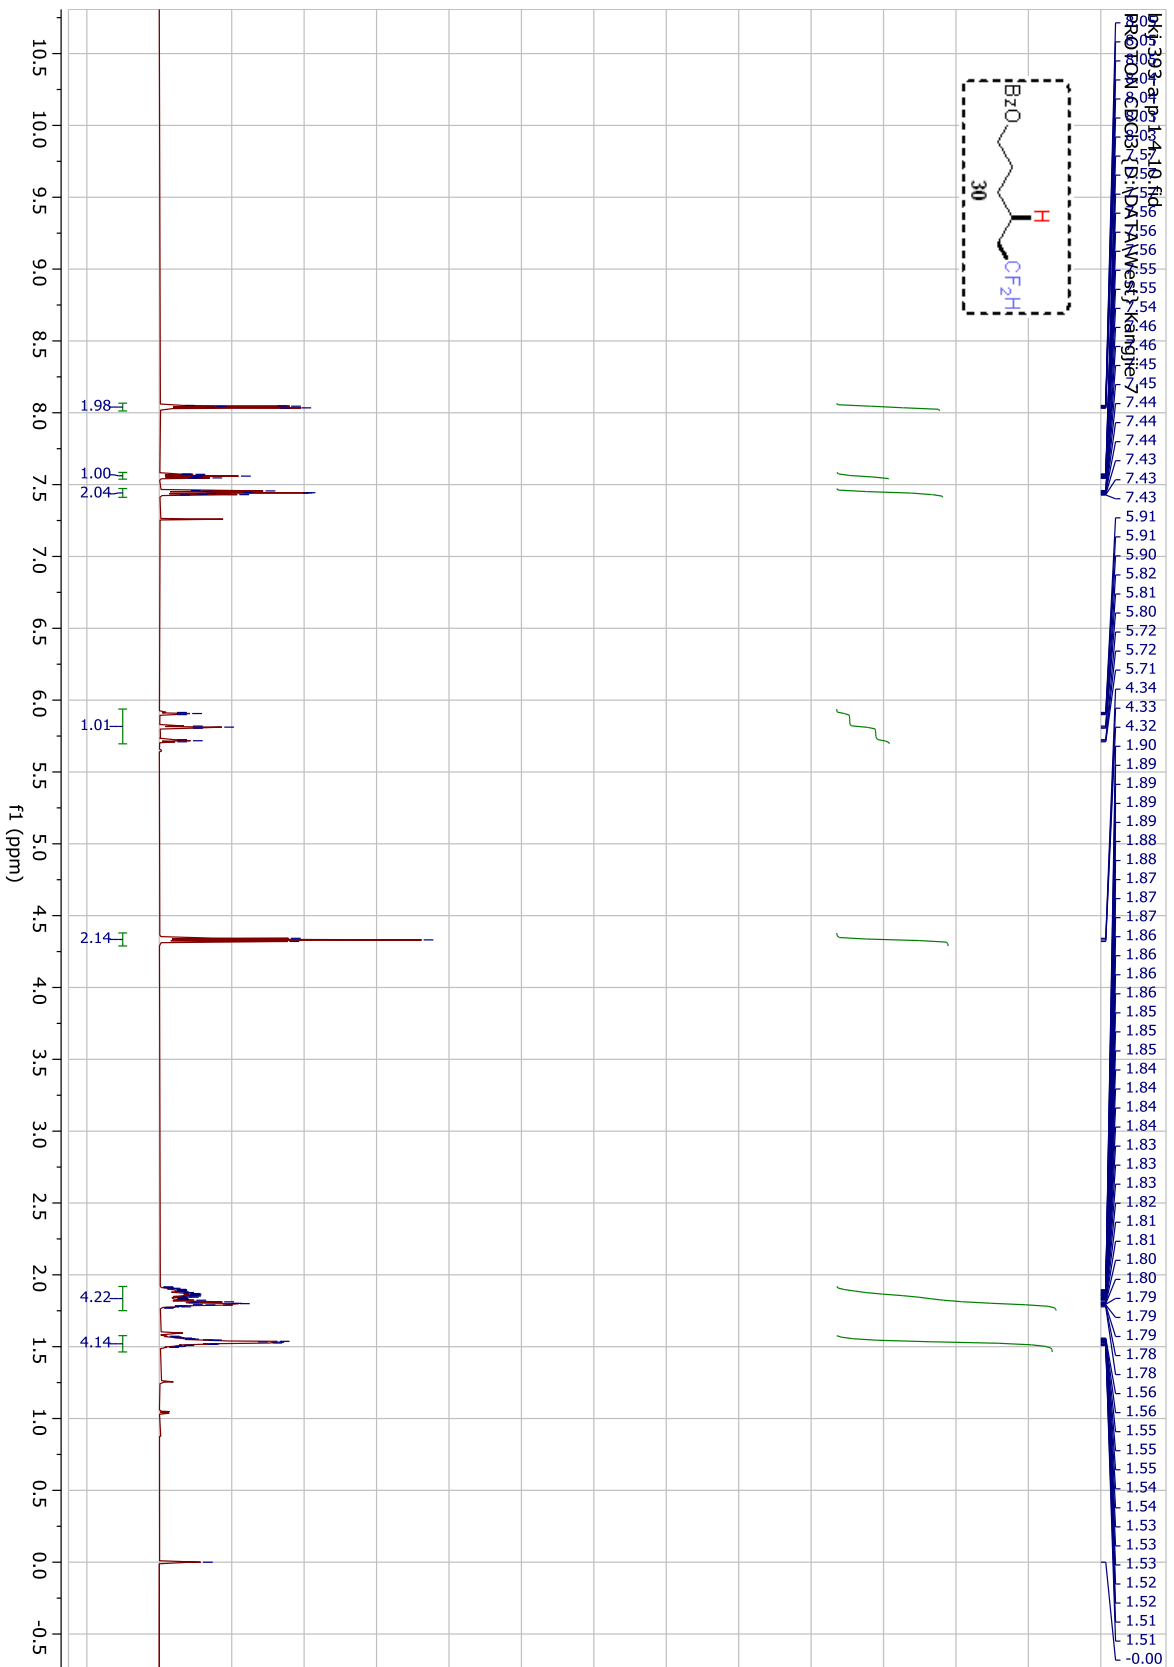

bkt-393-a-p-1,4,11.fid  
C13CPD CDCl3 (D:\DATA\Westj Kangji)

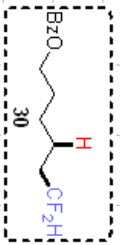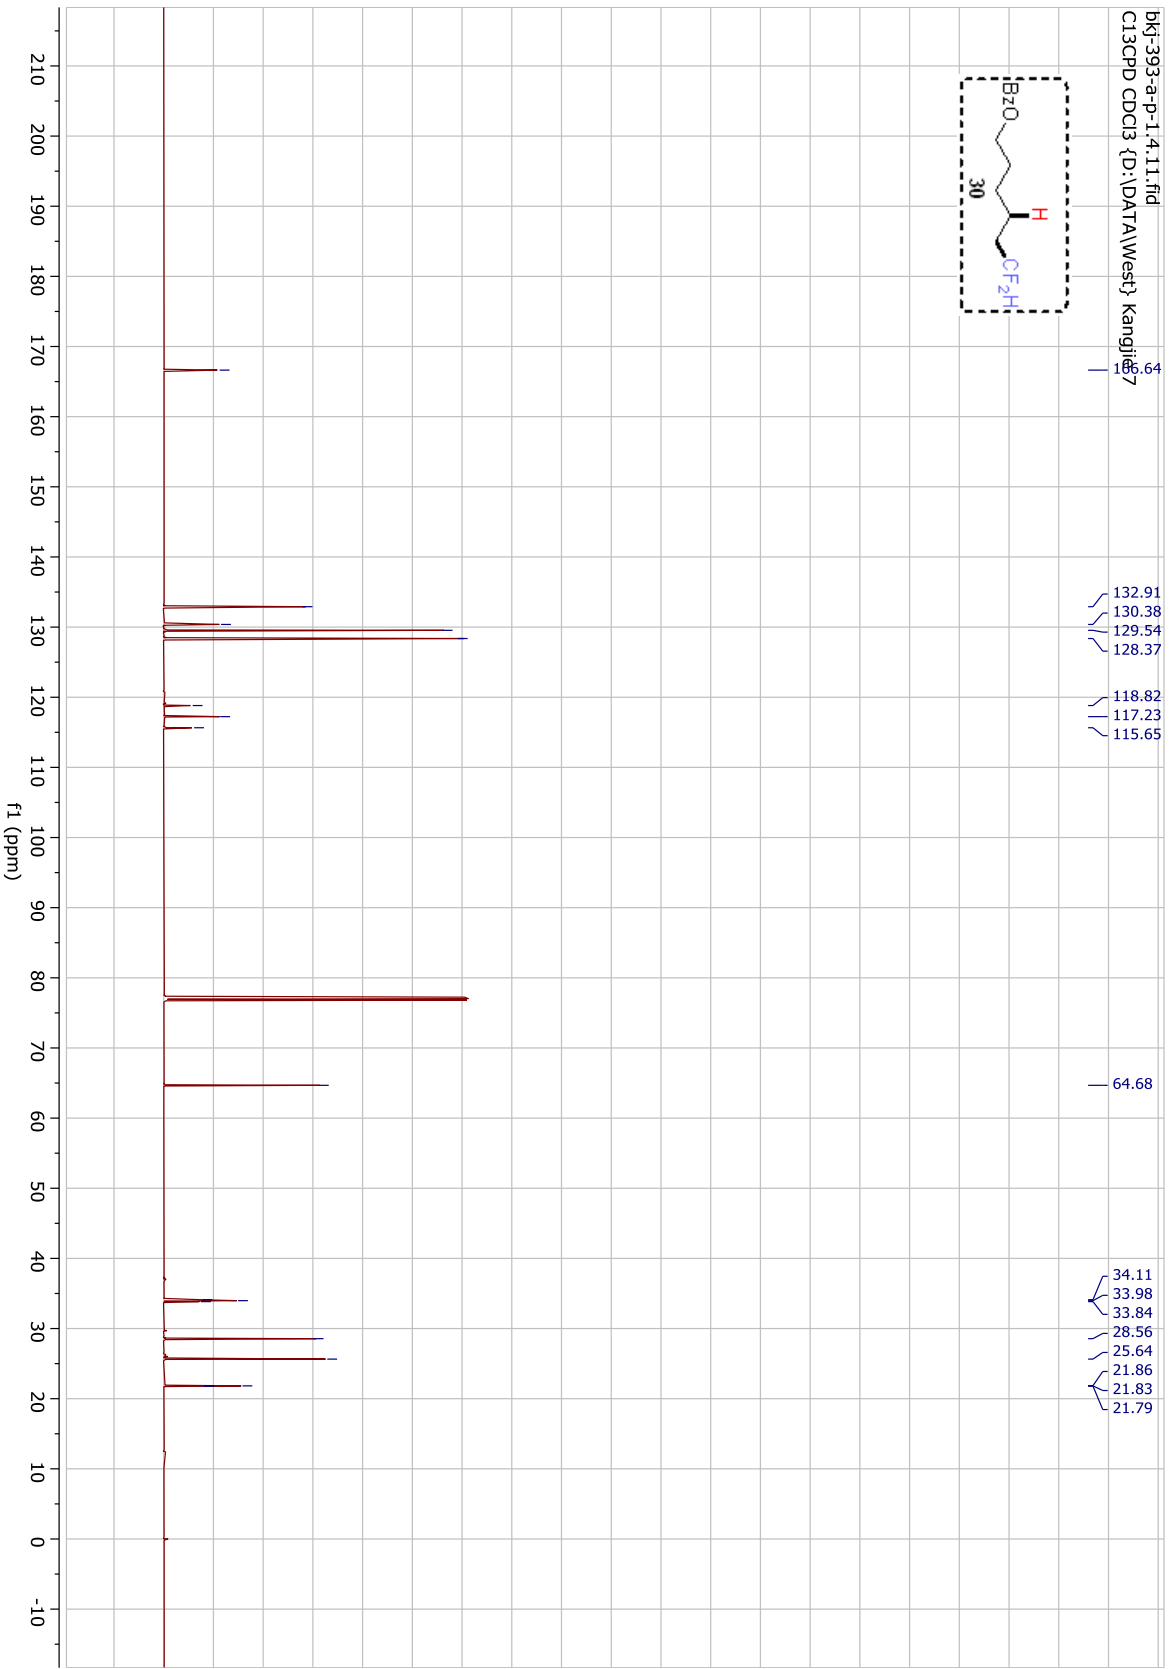

bkj-393-a-p-1-4-12.fid  
F19\_baseline\_correct ID  
F19\_baseline\_correct CDCl3 {D:\DATA\West\ Kangjie 7

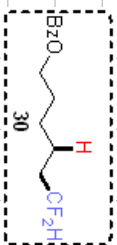

-115.80  
-115.83  
-115.86  
-115.90  
-115.93  
-115.96

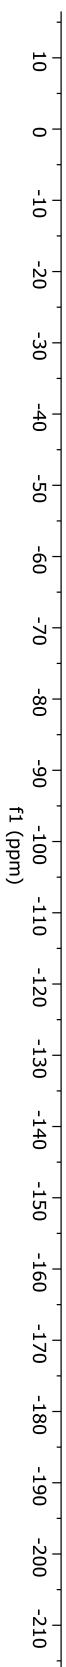

bkl-393-c-p-h-1.2.10.fid  
PROTON CDCl3\_3mm\_tubes {D:\DATA\Wesley\_Kangji\}

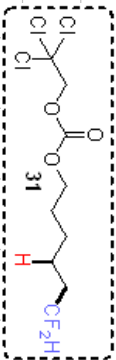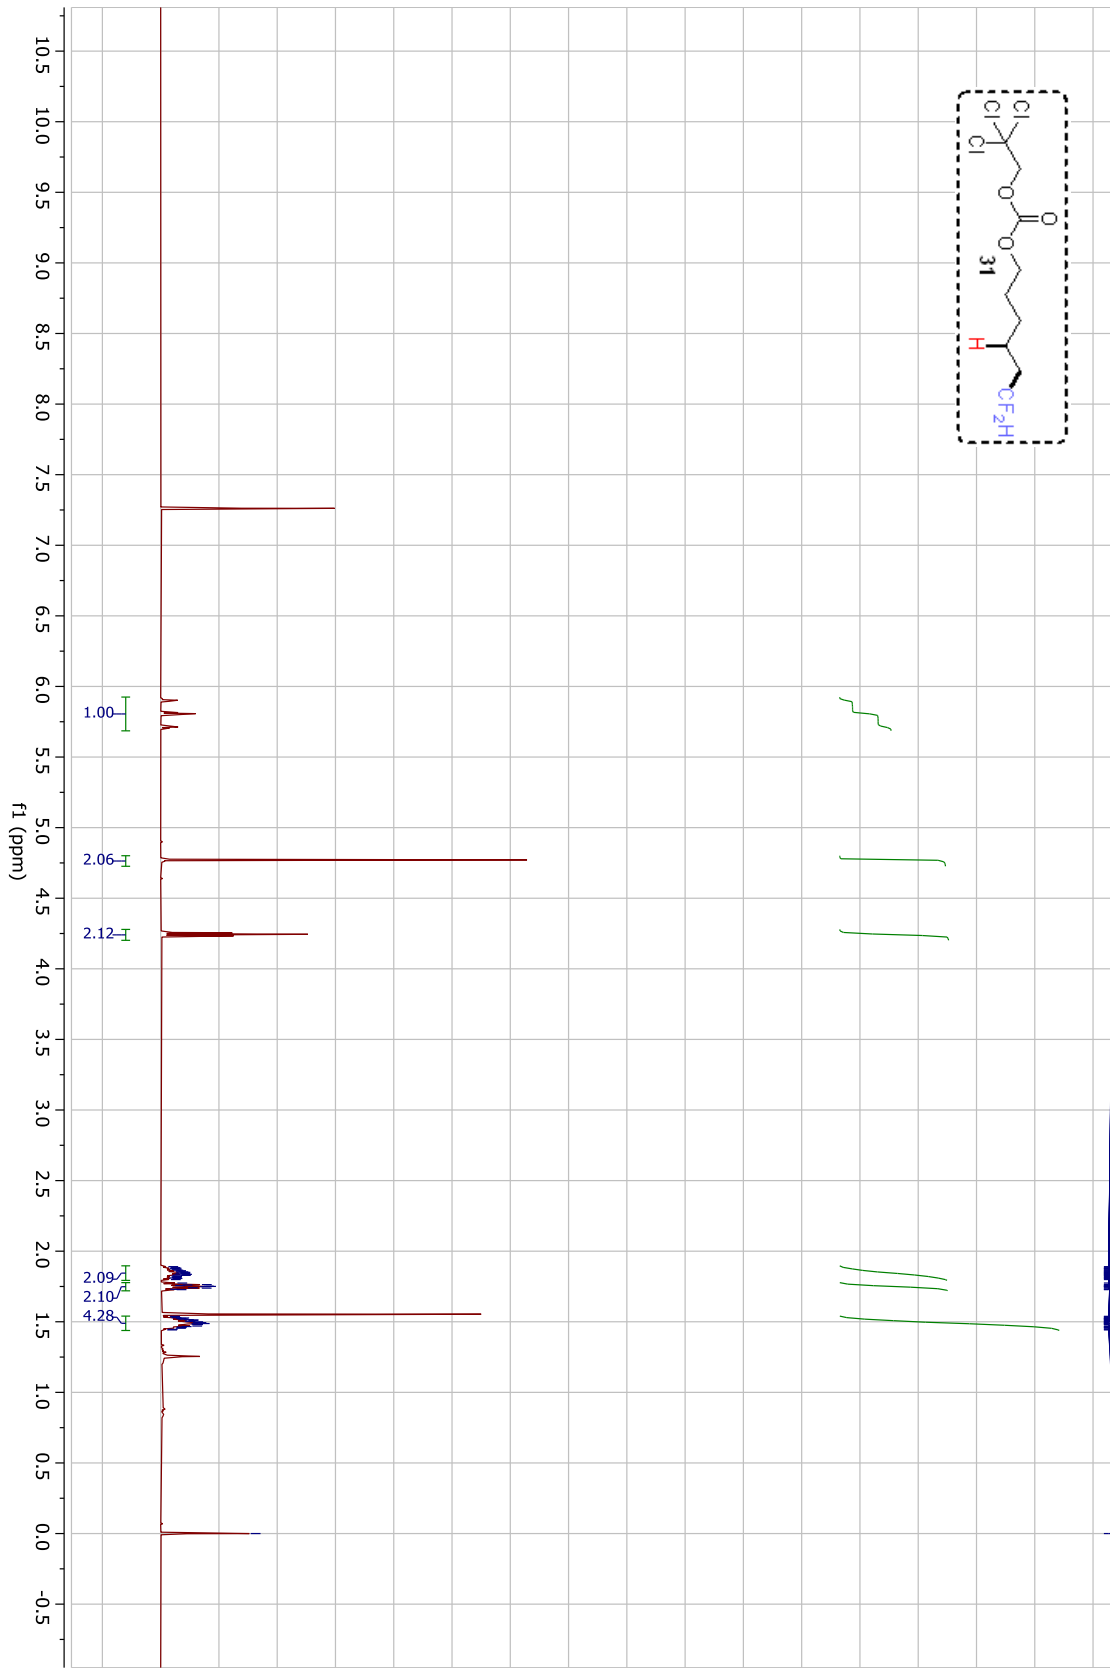

bk1-393-c-p-h-1.2.11.fid  
C13CPD CDCl3\_3mm\_tubes {D:\DATA\Westfy\Kangjie 2

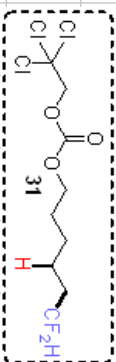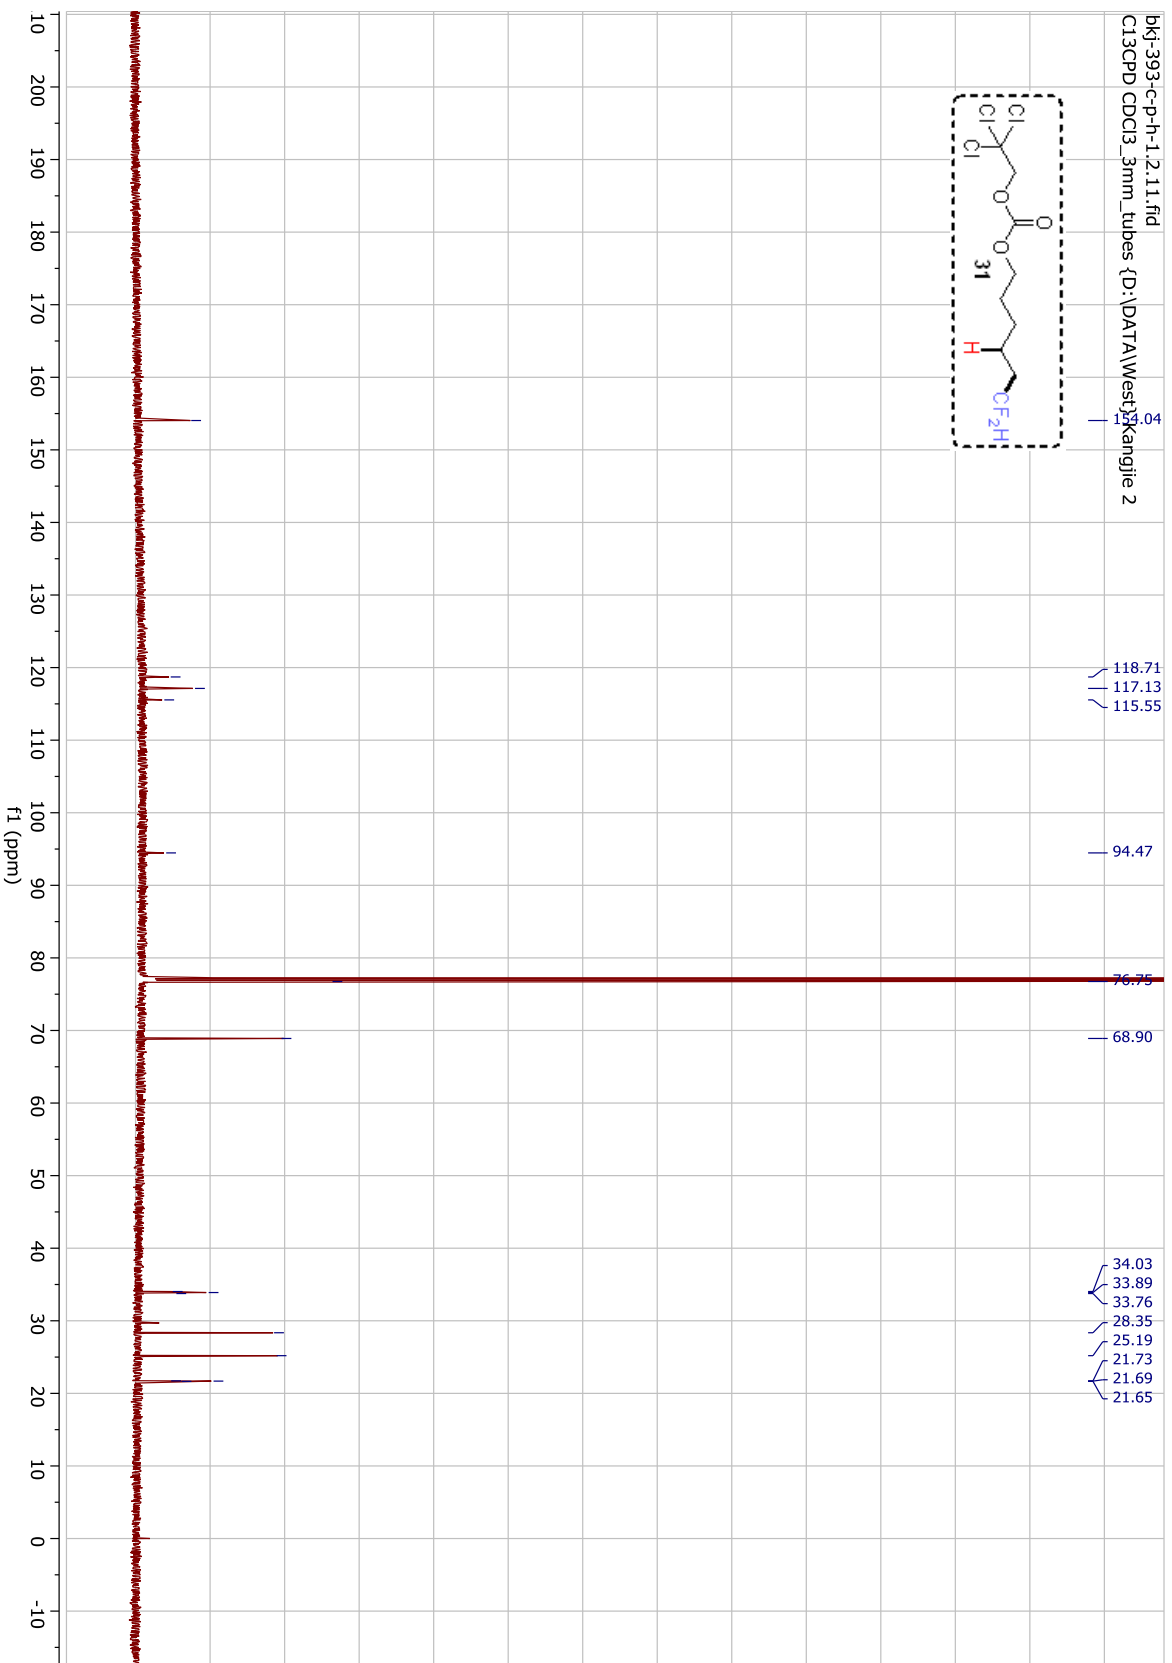

bkj-393-c-p-h-1.2.12.fid  
F19\_baseline\_correct\_1D  
F19\_baseline\_correct CDCl3 3mm\_tubes {D:\DATA\West} Kangjie 2

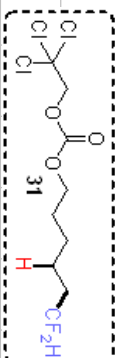

-115.88  
-115.91  
-115.91  
-115.94  
-115.94  
-115.98  
-116.01  
-116.04

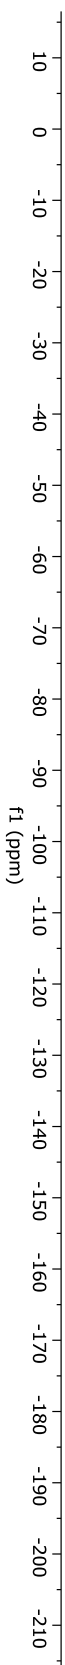



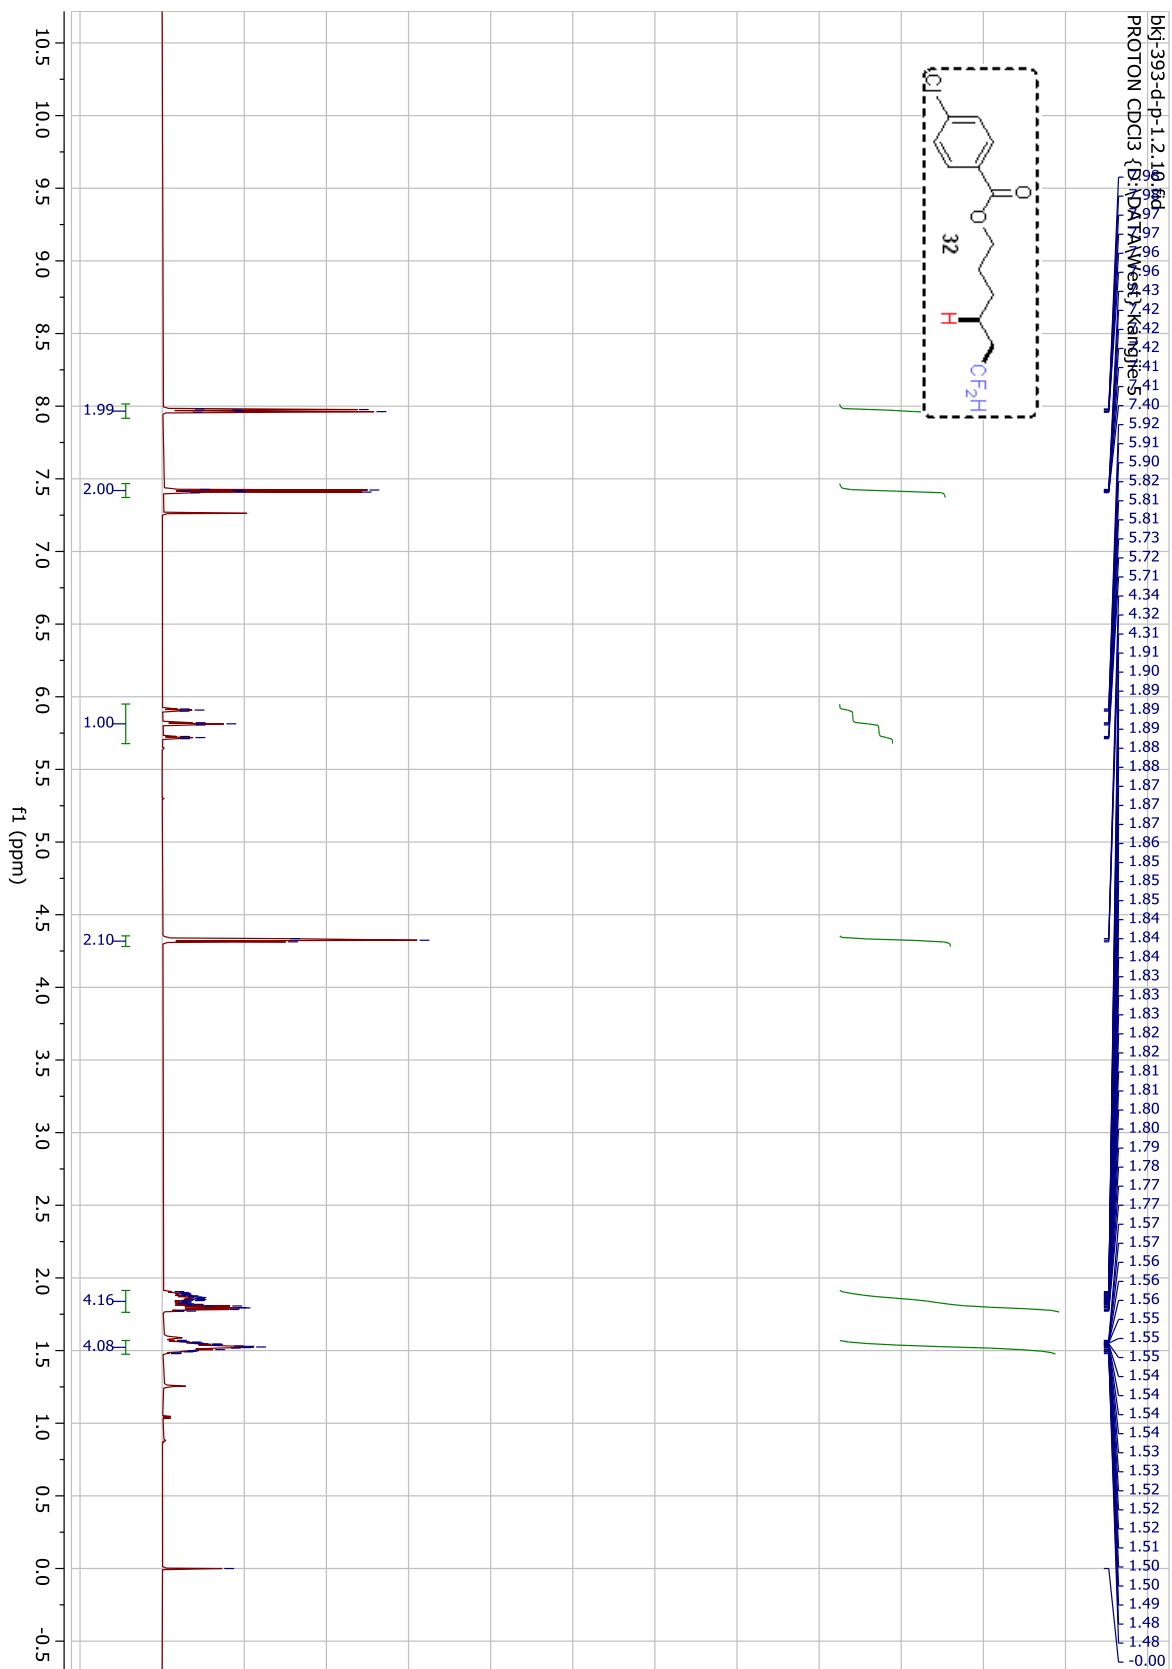

bkj-393-d-p-1,2,1,1.fid  
C13CPD CDCl3 (D:\DATA\Westj Kangjief5

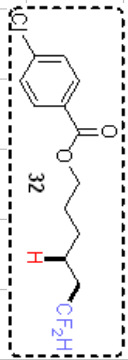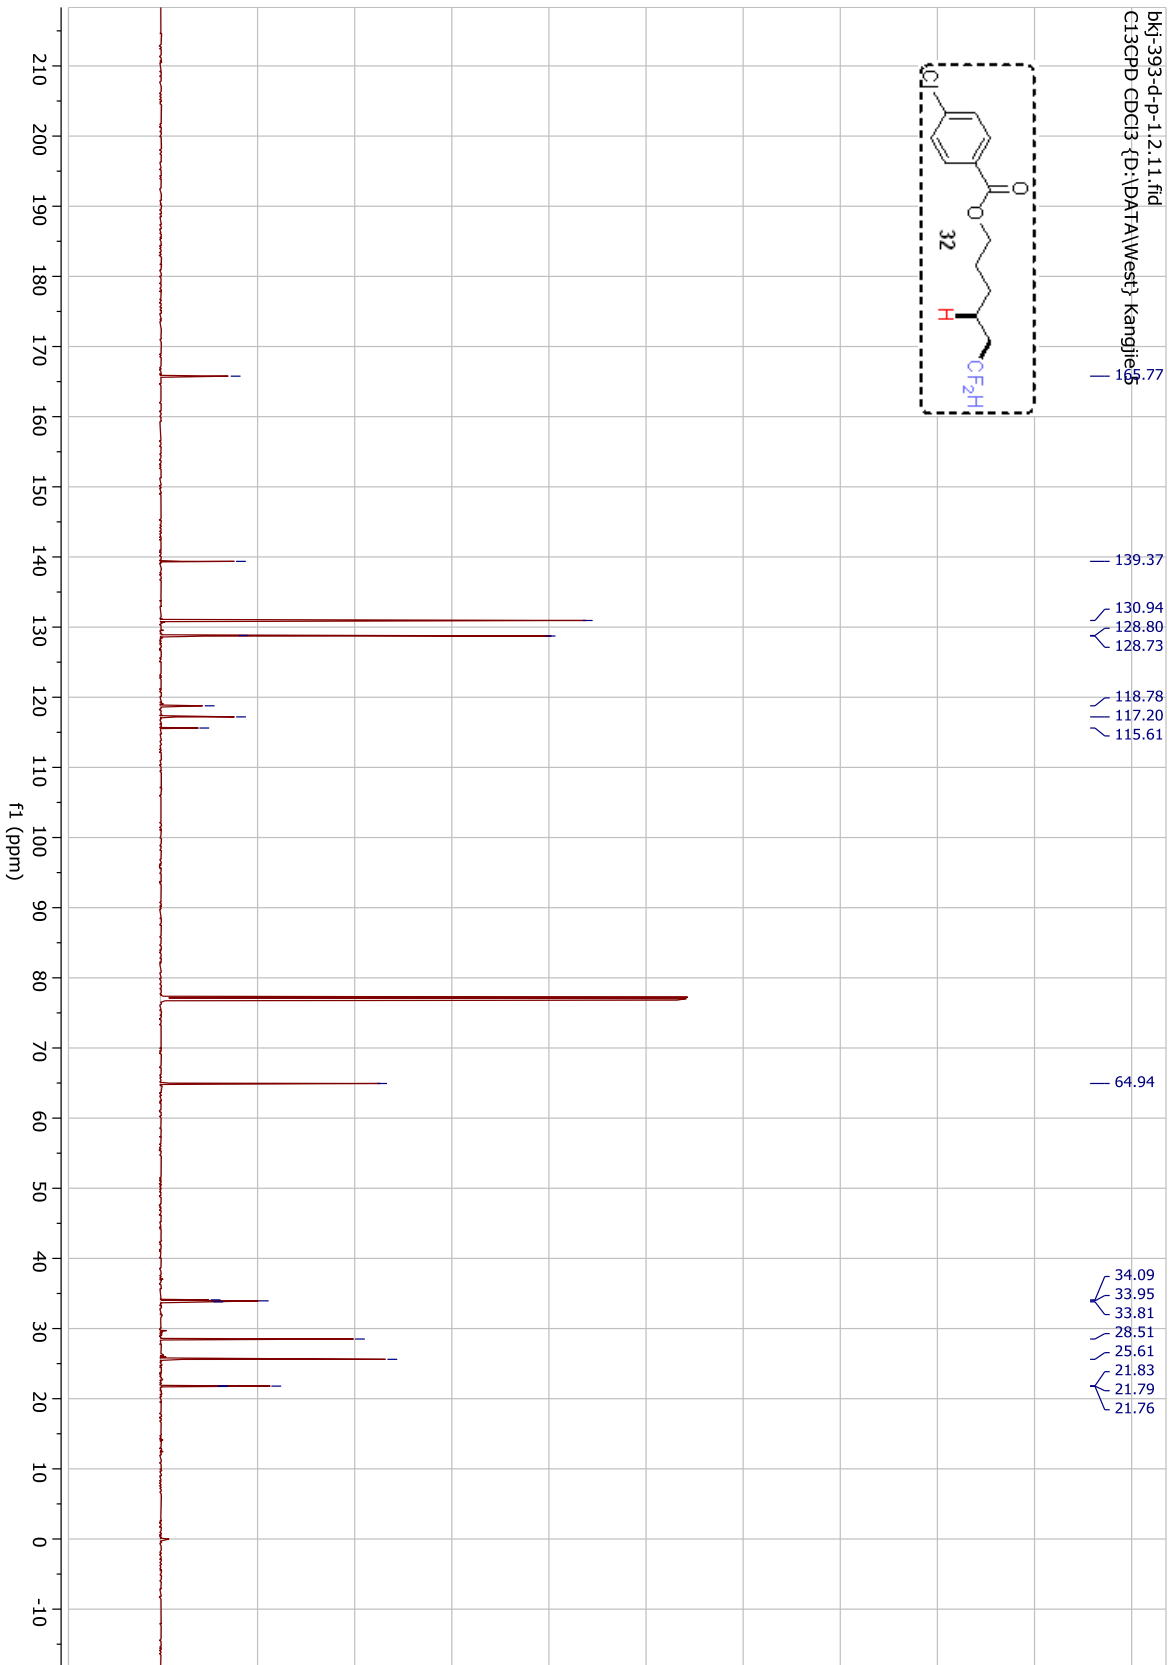

bkj-393-d-p-1.2.12.fid  
F19\_baseline\_correct 1D  
F19\_baseline\_correct CDCI3 {D:\DATA\West} Kangjie 5

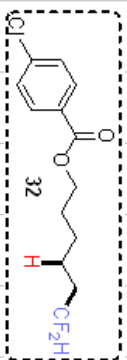

-115.82  
-115.85  
-115.88  
-115.92  
-115.92  
-115.95  
-115.98



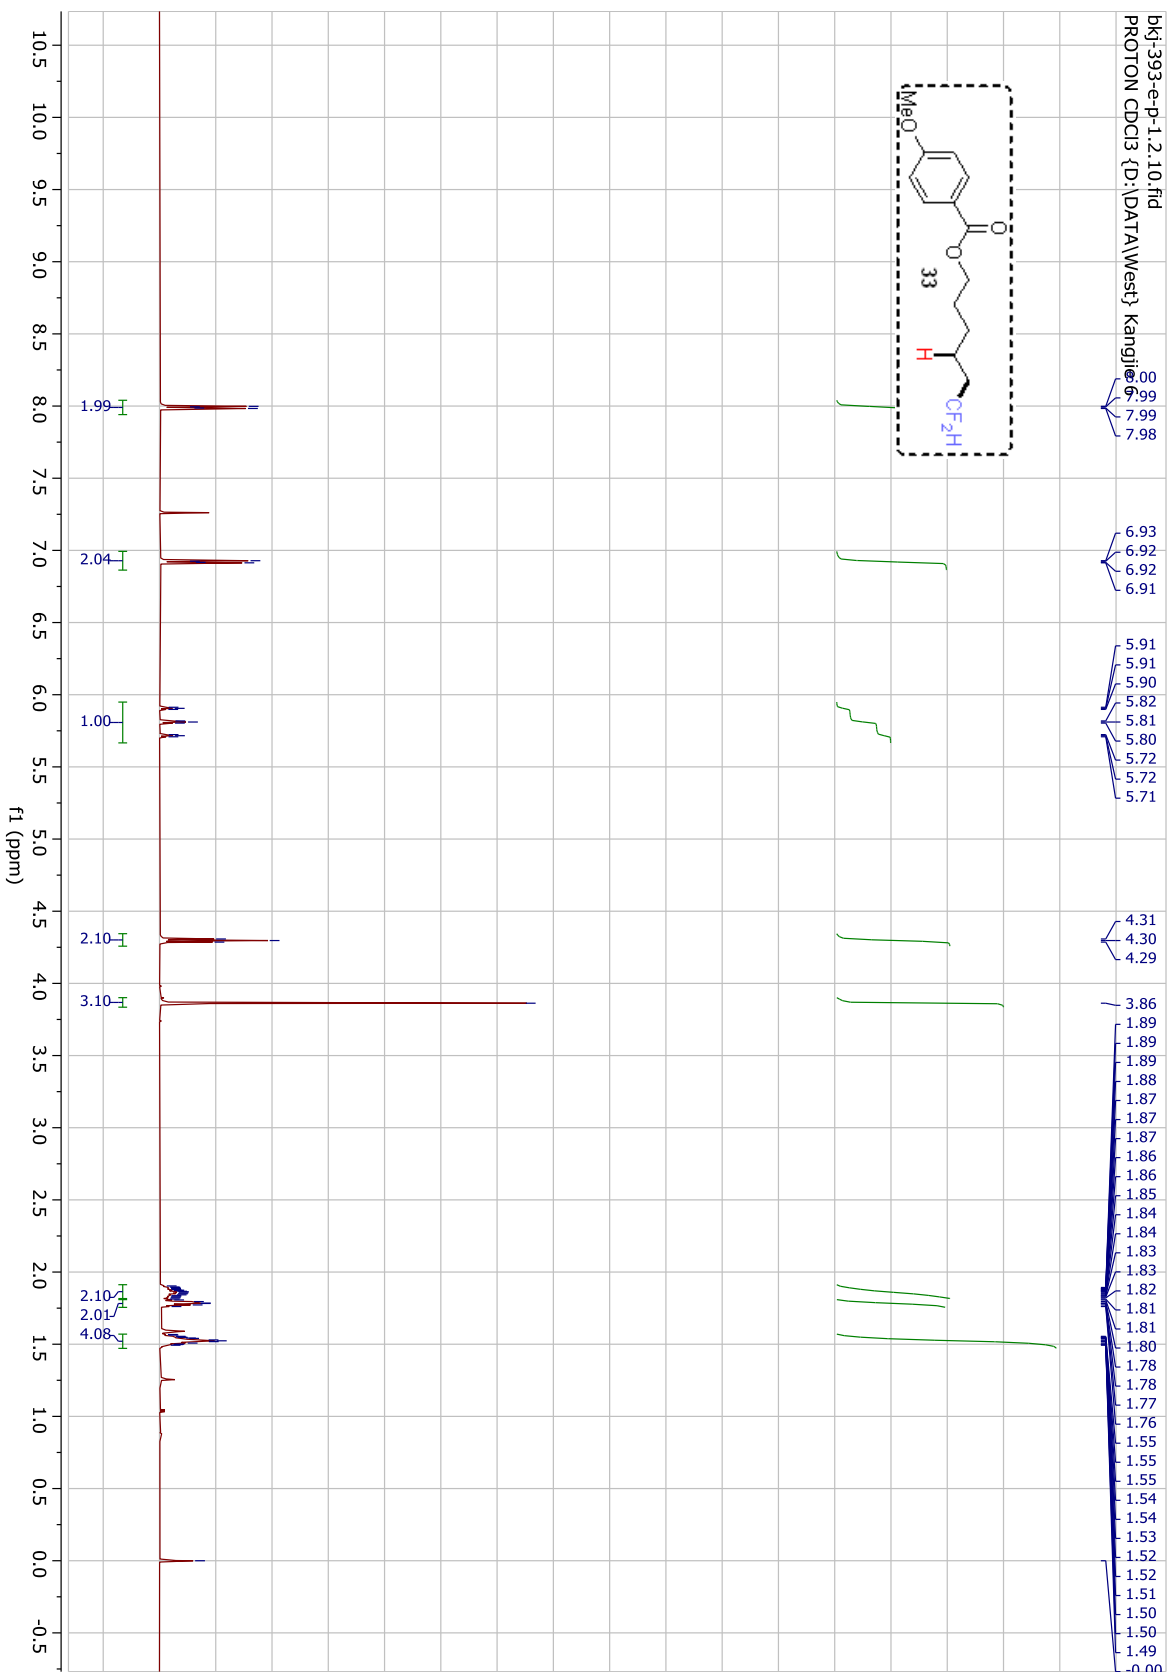

bkt-393-e-p-1,2,11.fid  
C13CPD CDCl3 (D:\DATA\Westj Kanji)

40  
163.34  
131.55  
122.81  
118.83  
117.25  
115.67  
113.61

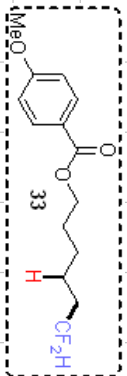

64.38  
55.44  
34.12  
33.98  
33.84  
28.60  
25.66  
21.87  
21.84  
21.80

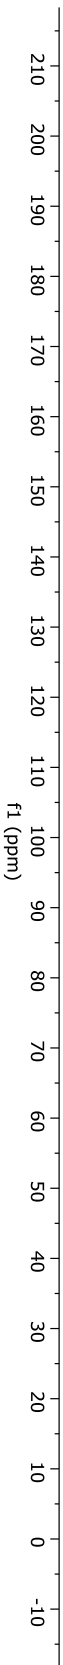

bkj-393-e-p-1.2.12.fid  
F19\_baseline\_correct 1D  
F19\_baseline\_correct CDC13 {D:\DATA\West\ Kangjie 6

-115.78  
-115.81  
-115.84  
-115.88  
-115.91  
-115.94

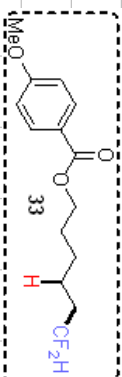

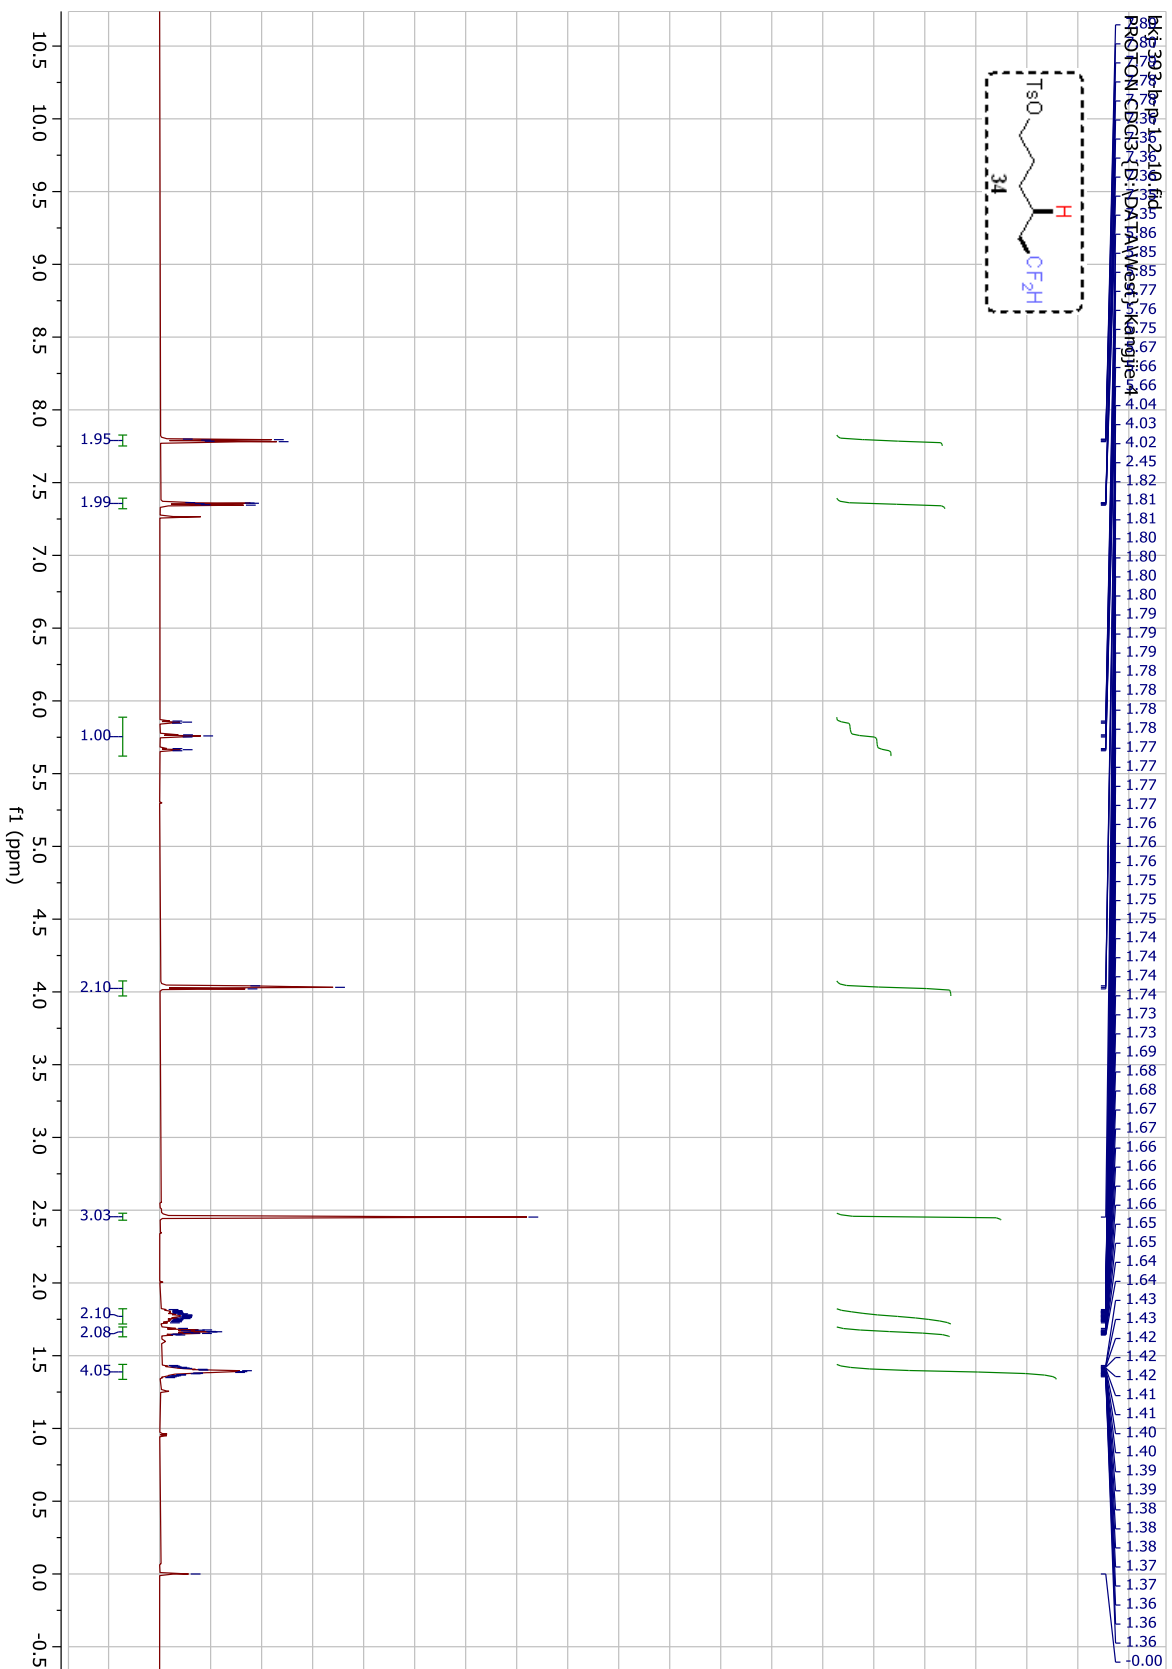

bkj-393-b-p-1,2,1,1.fid  
C13CPD CDCl3 (D:\DATA\Westj\_Kangjie 4

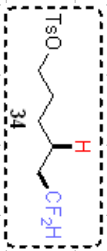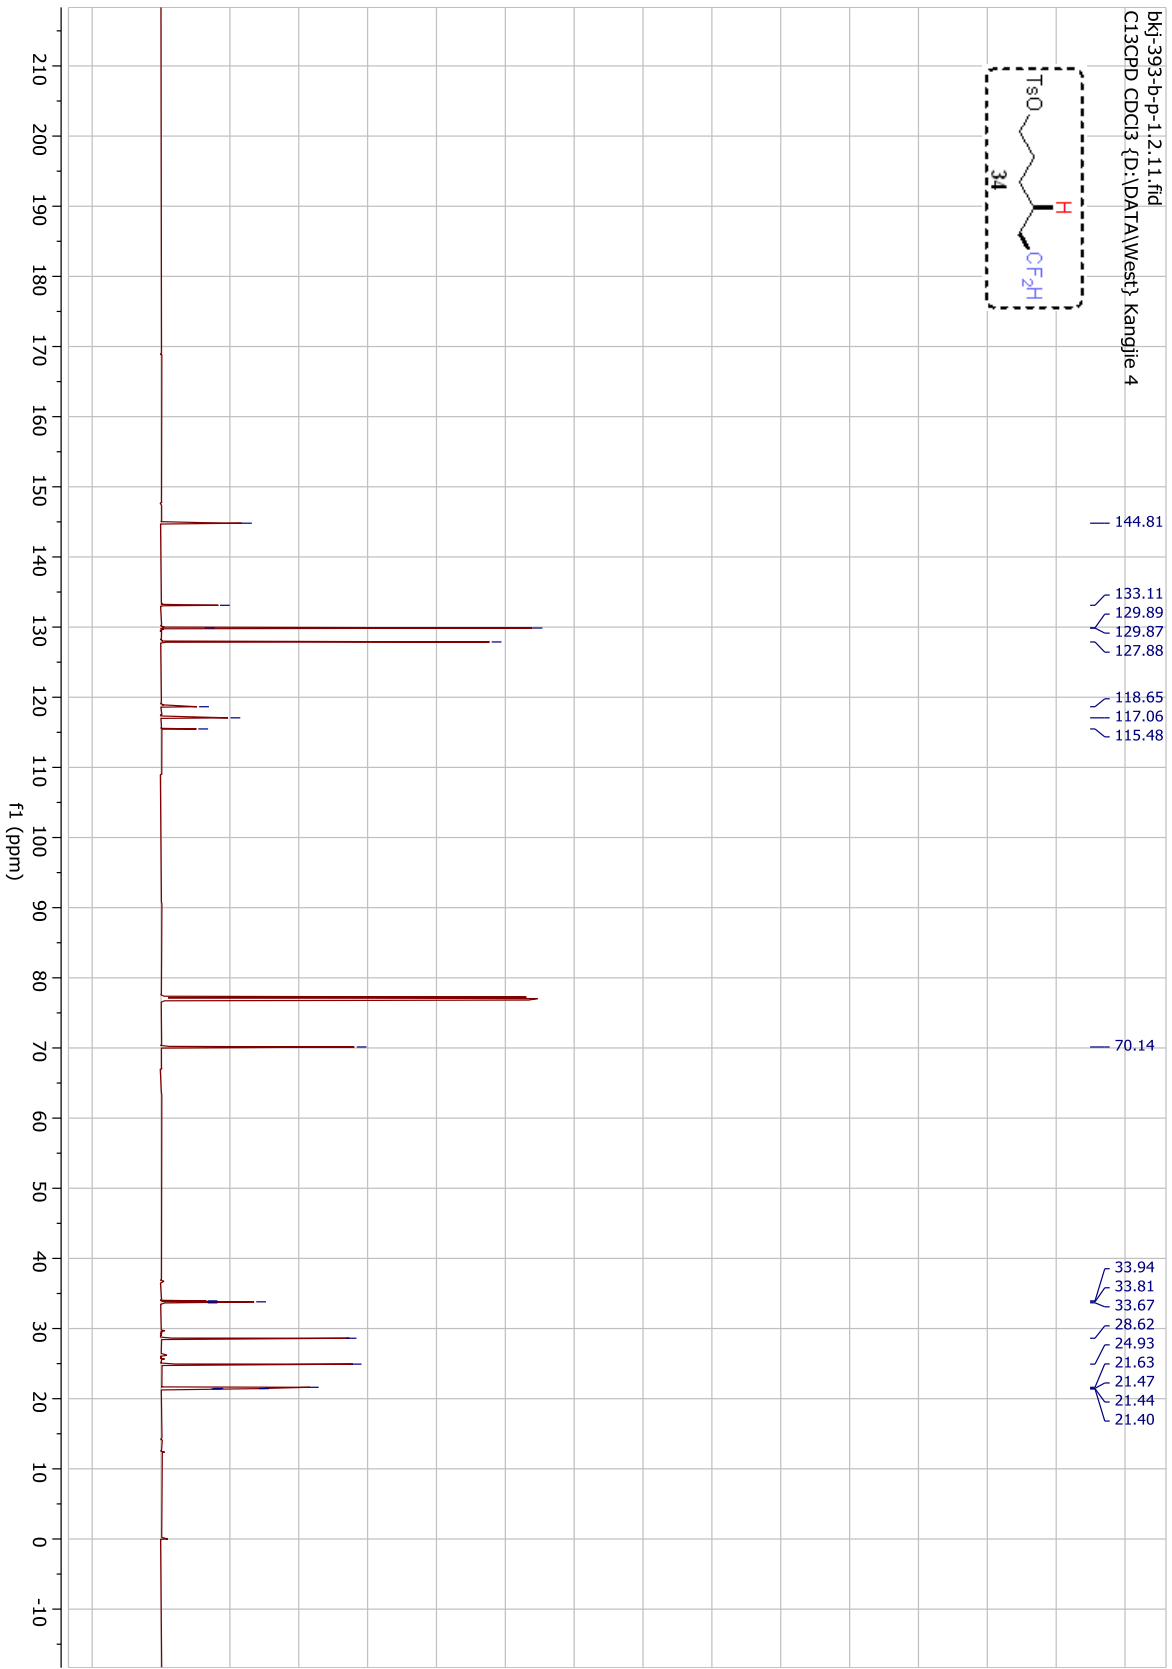



bkj-393-b-p-1.2.12.fid  
F19\_baseline\_correct ID  
F19\_baseline\_correct CDCl3 {D:\DATA\West\ Kangjie 4

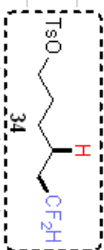

-115.92  
-115.95  
-115.98  
-116.02  
-116.05  
-116.08



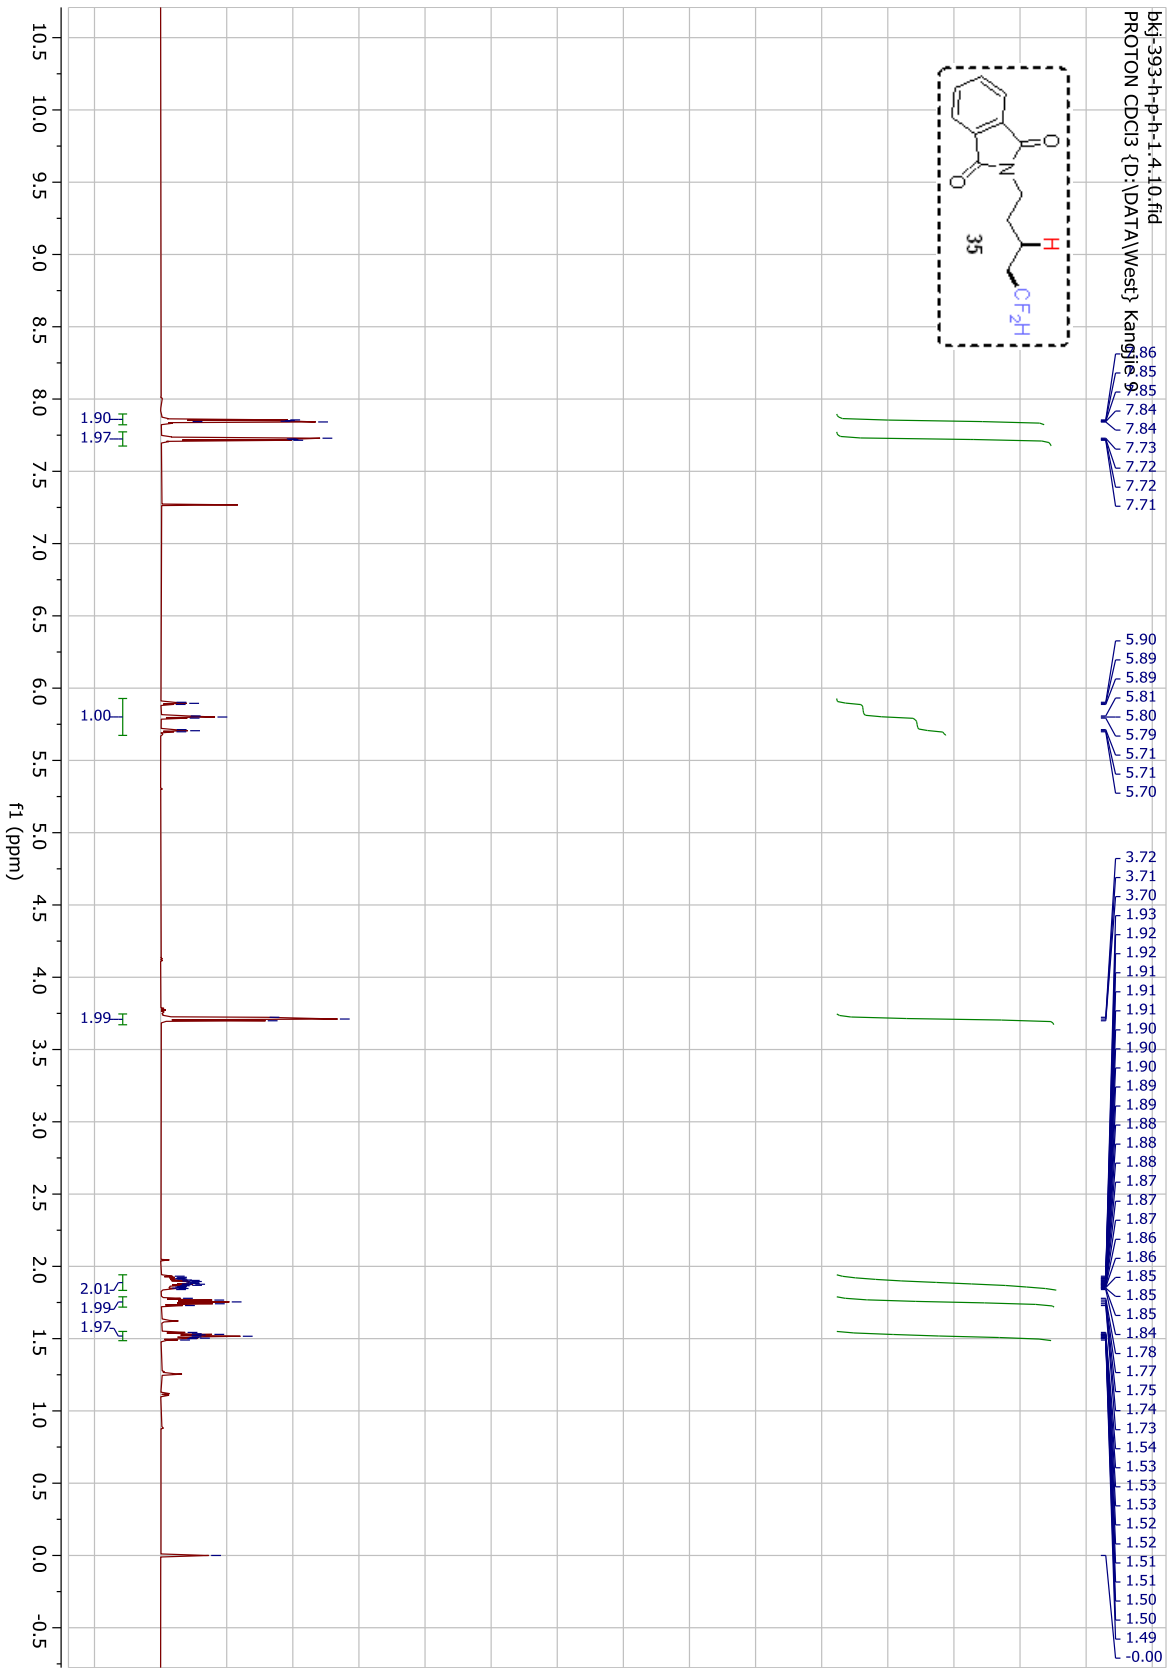

bkt-393-h-p-1,4,1,1.fid  
C13CPD CDCl3 (D:\DATA\Westj\_Kanfig  
9

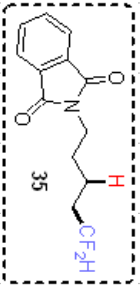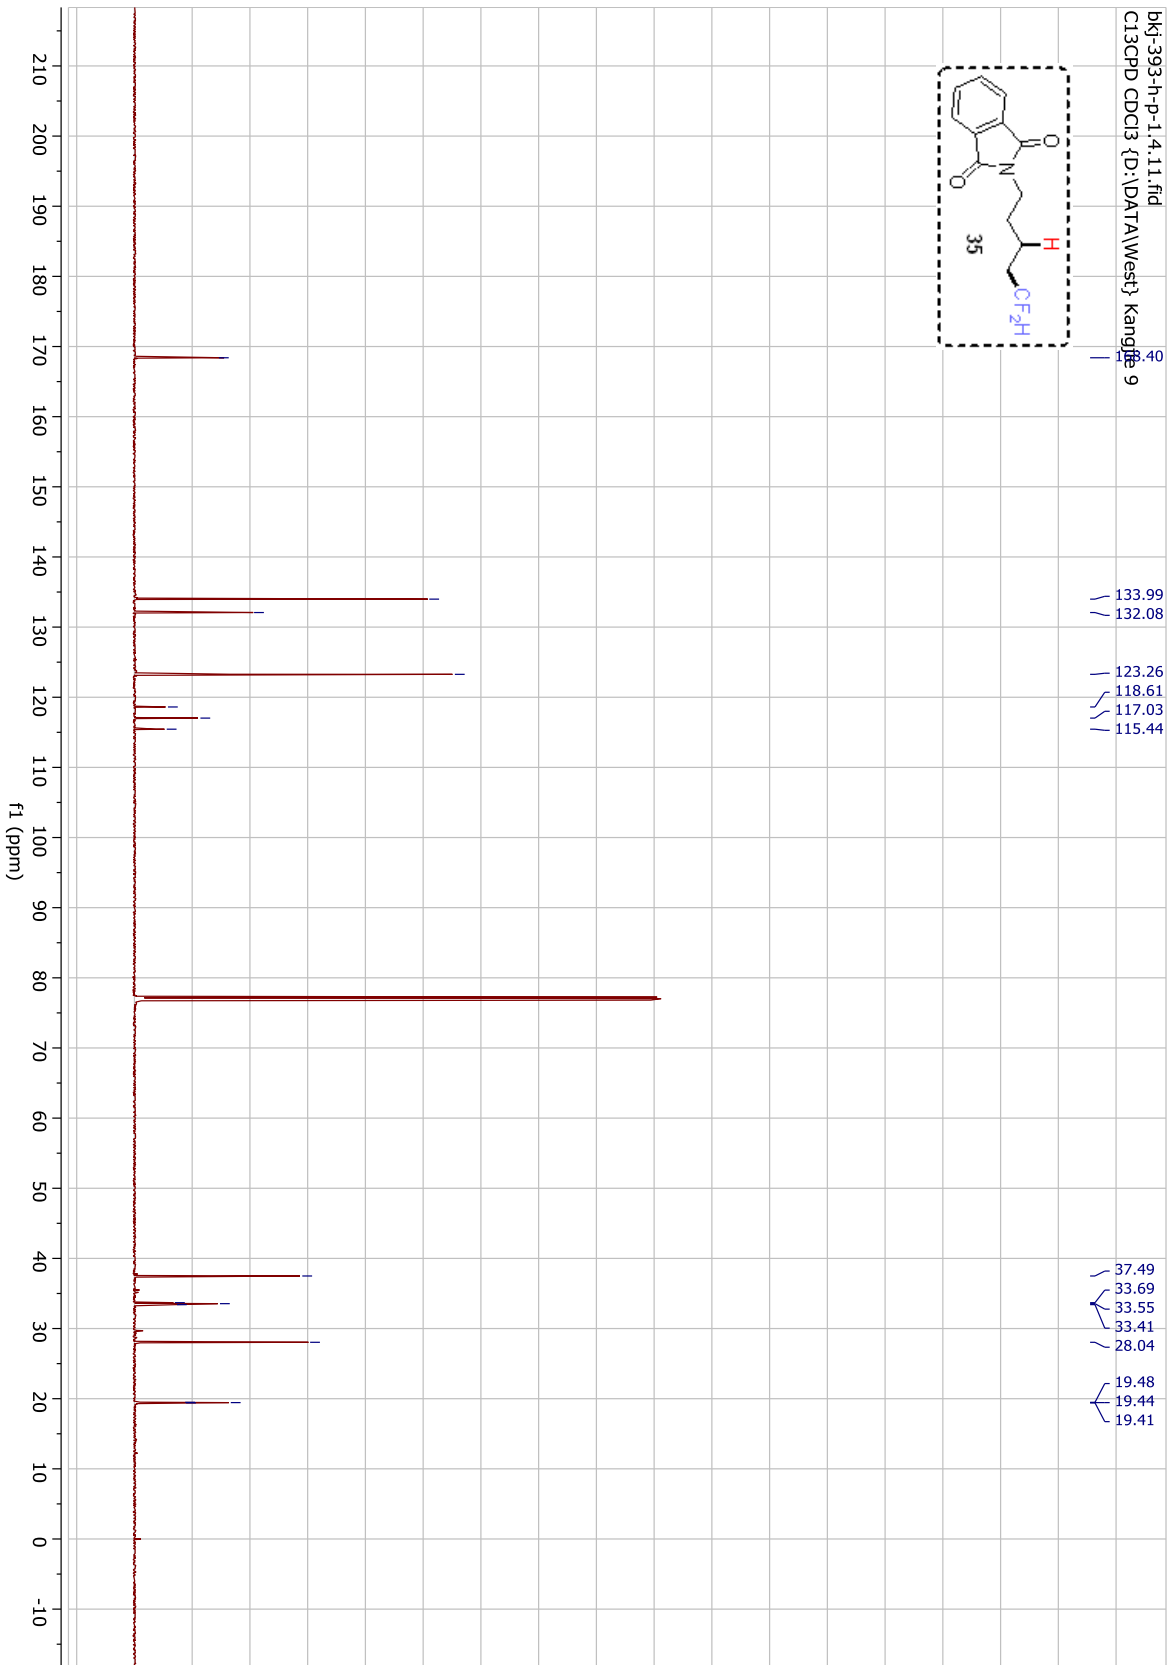

bkj-393-h-p-1-4.12.fid  
F19\_baseline\_correct ID  
F19\_baseline\_correct CDCl3 {D:\DATA\West} Kangjie 9

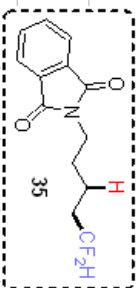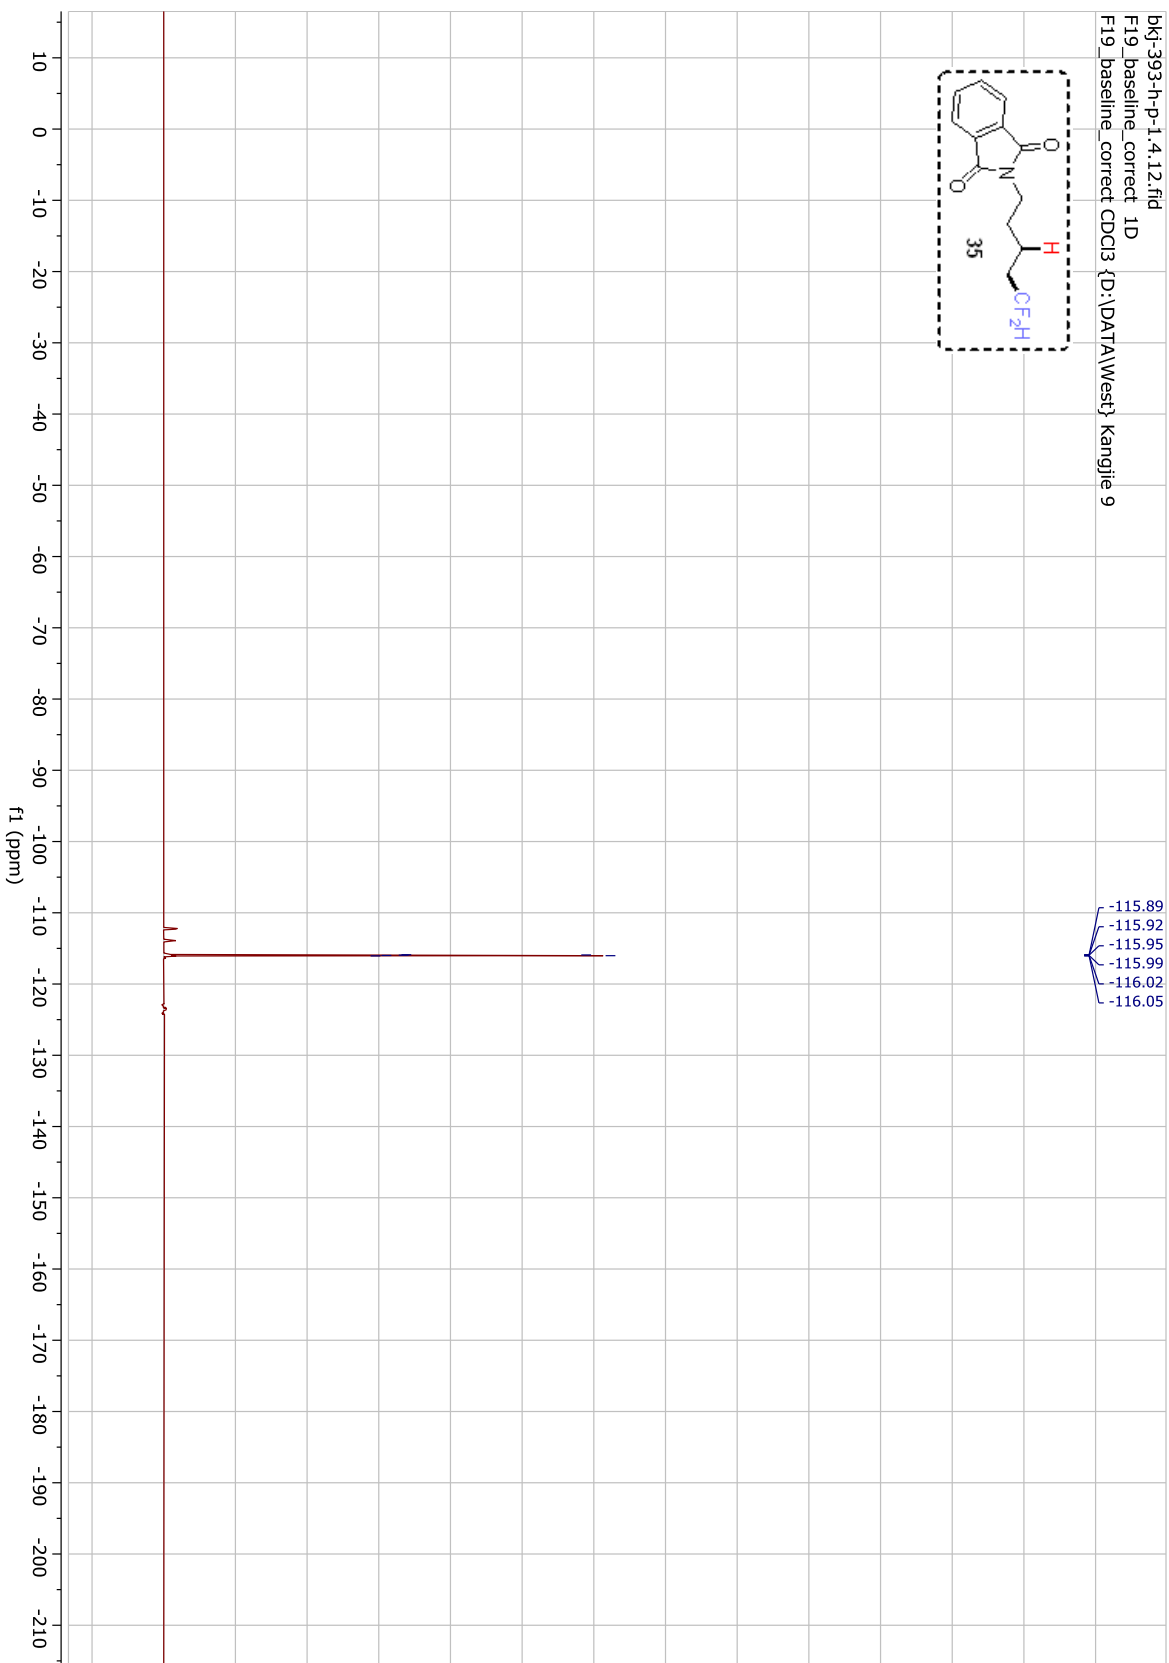

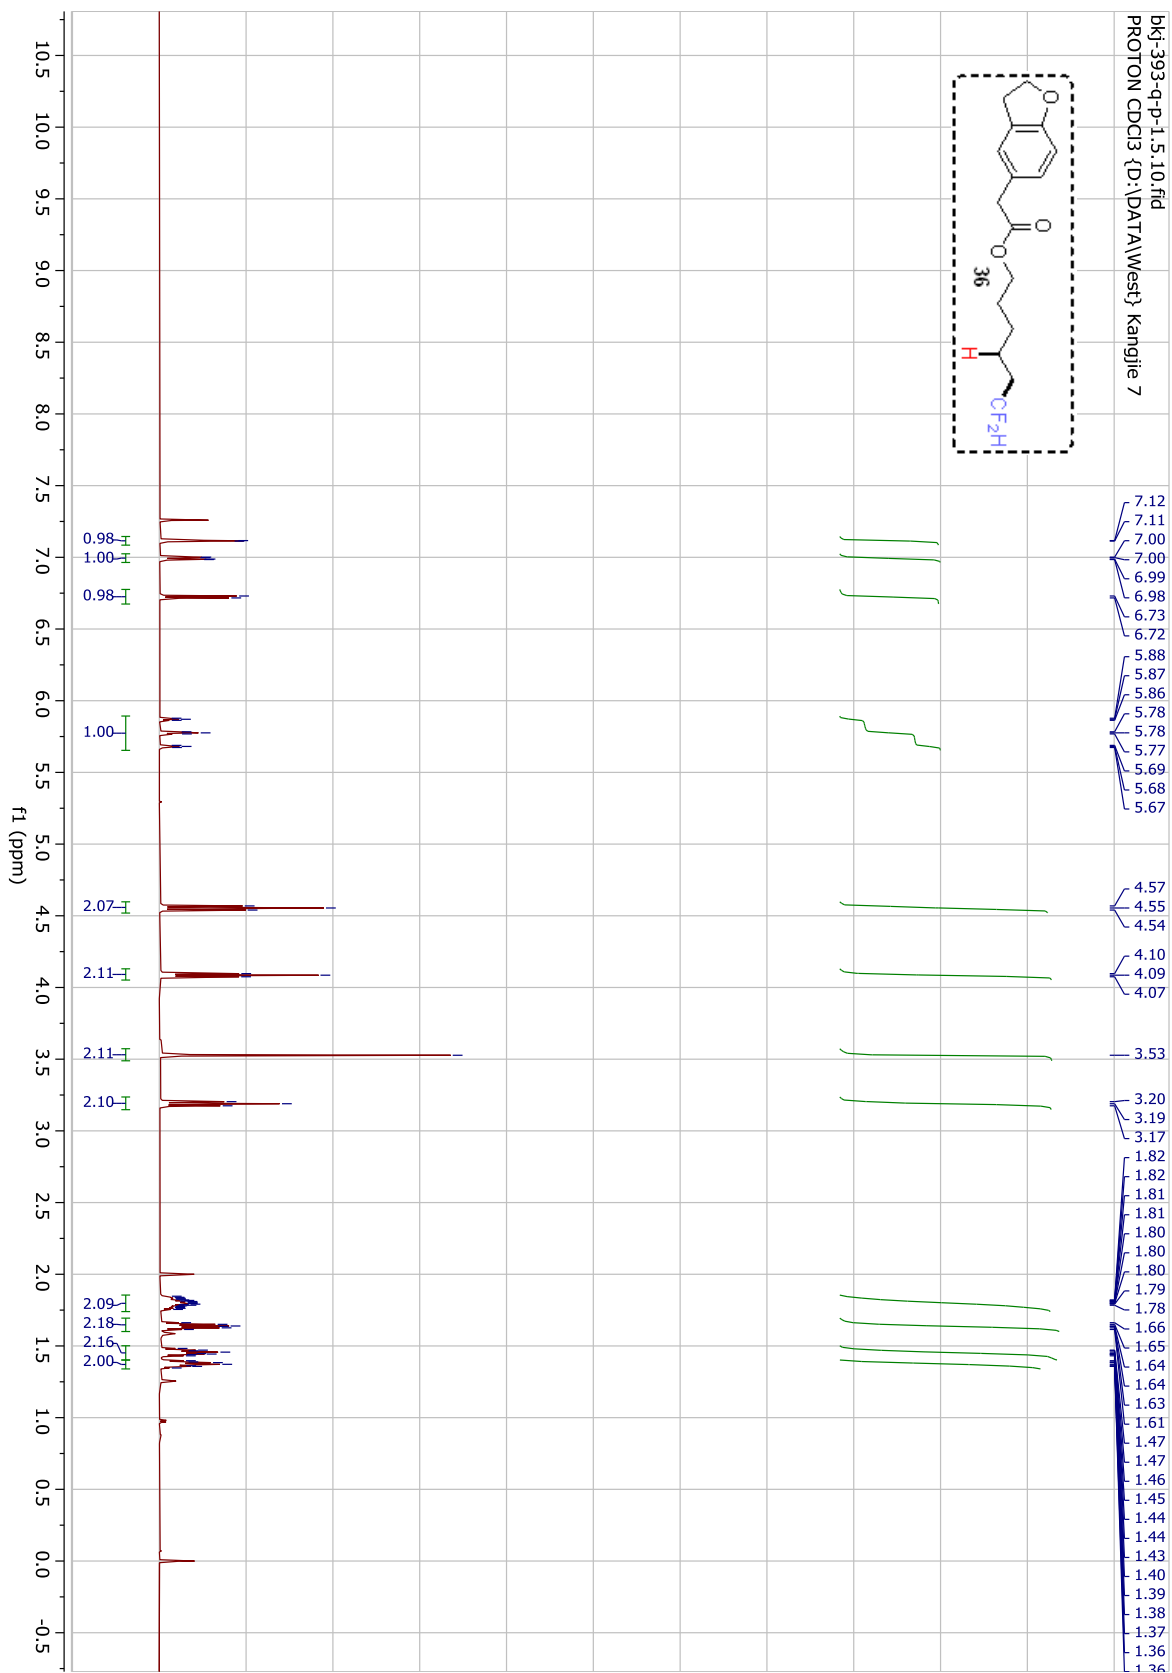

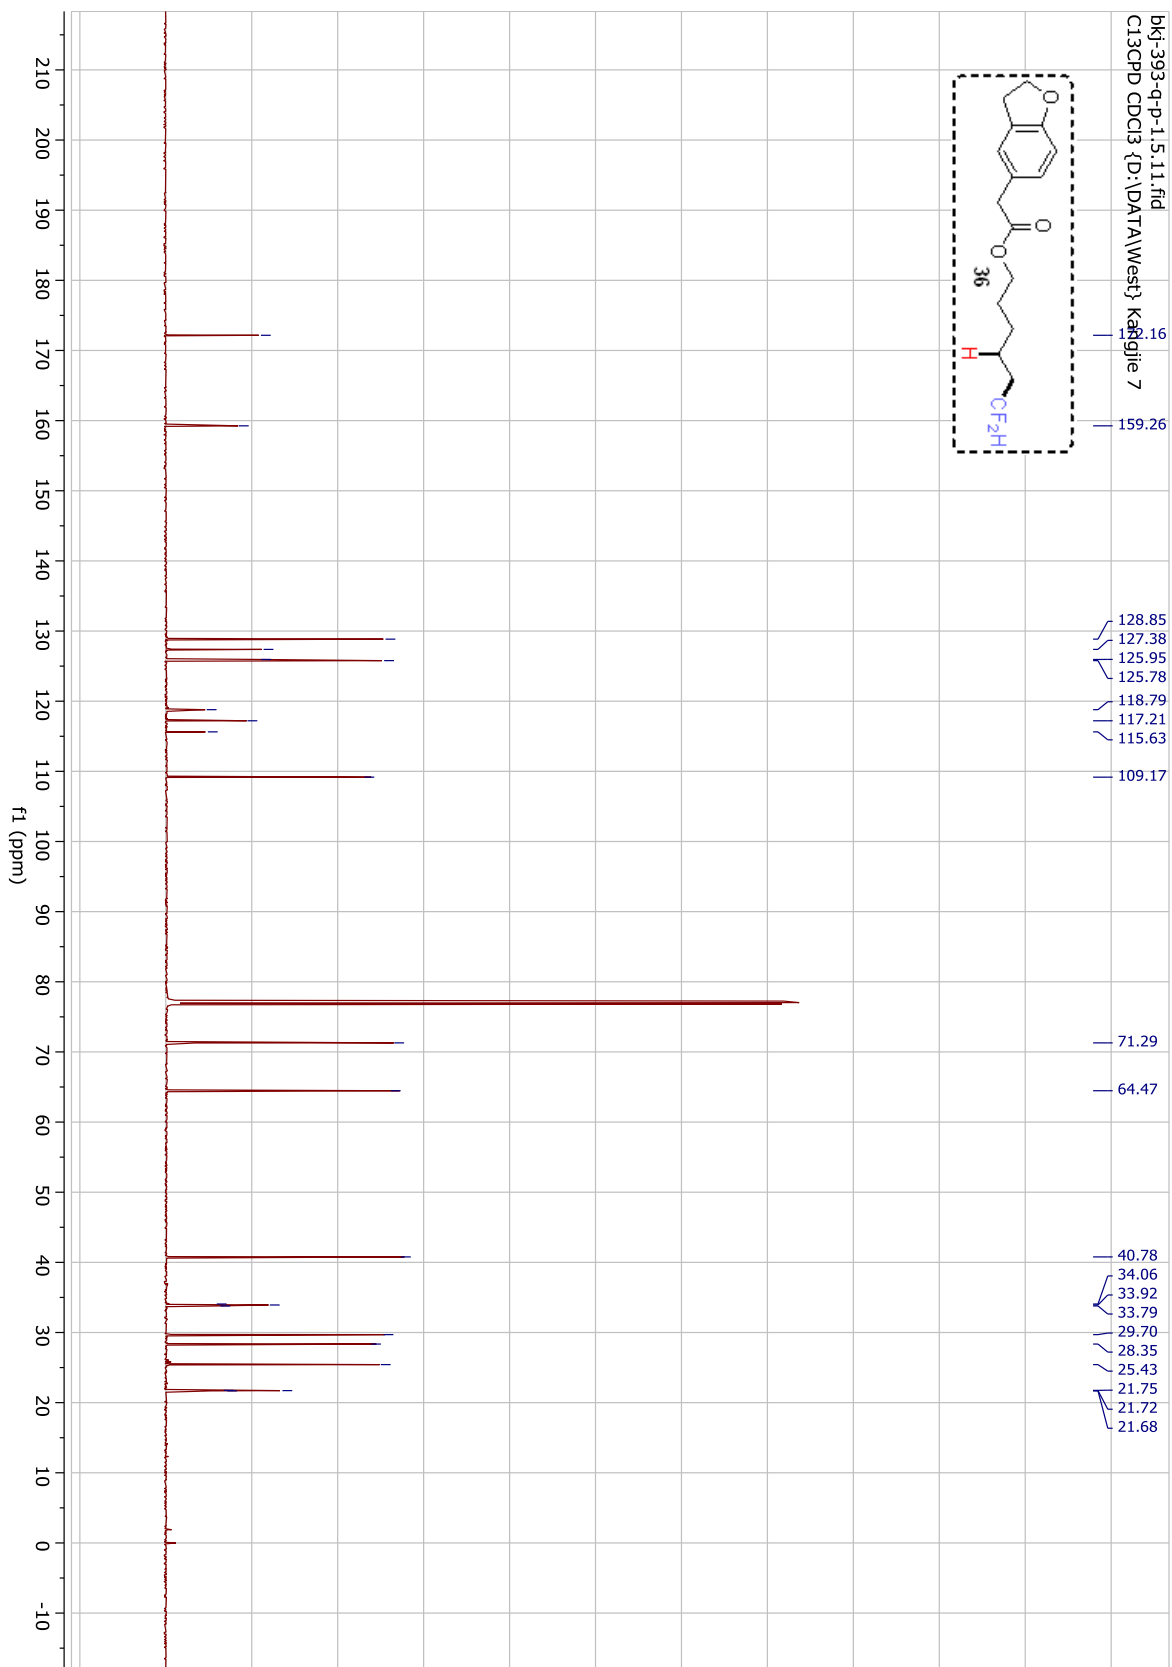

bkj-393-q-p-1.5.12.fid  
F19\_baseline\_correct 1D  
F19\_baseline\_correct CDC13 {D:\DATA\West\ Kangjie 7

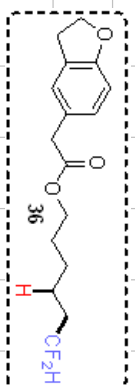

-115.78  
-115.81  
-115.82  
-115.82  
-115.85  
-115.88  
-115.91  
-115.95

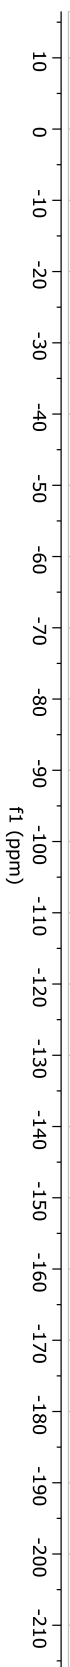





bkj-393-j-p-1,4,11.fid  
C13CPD CDCl3 (D:\DATAWestj\_Kangjie 11

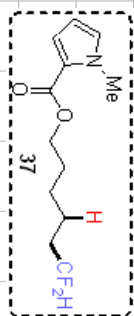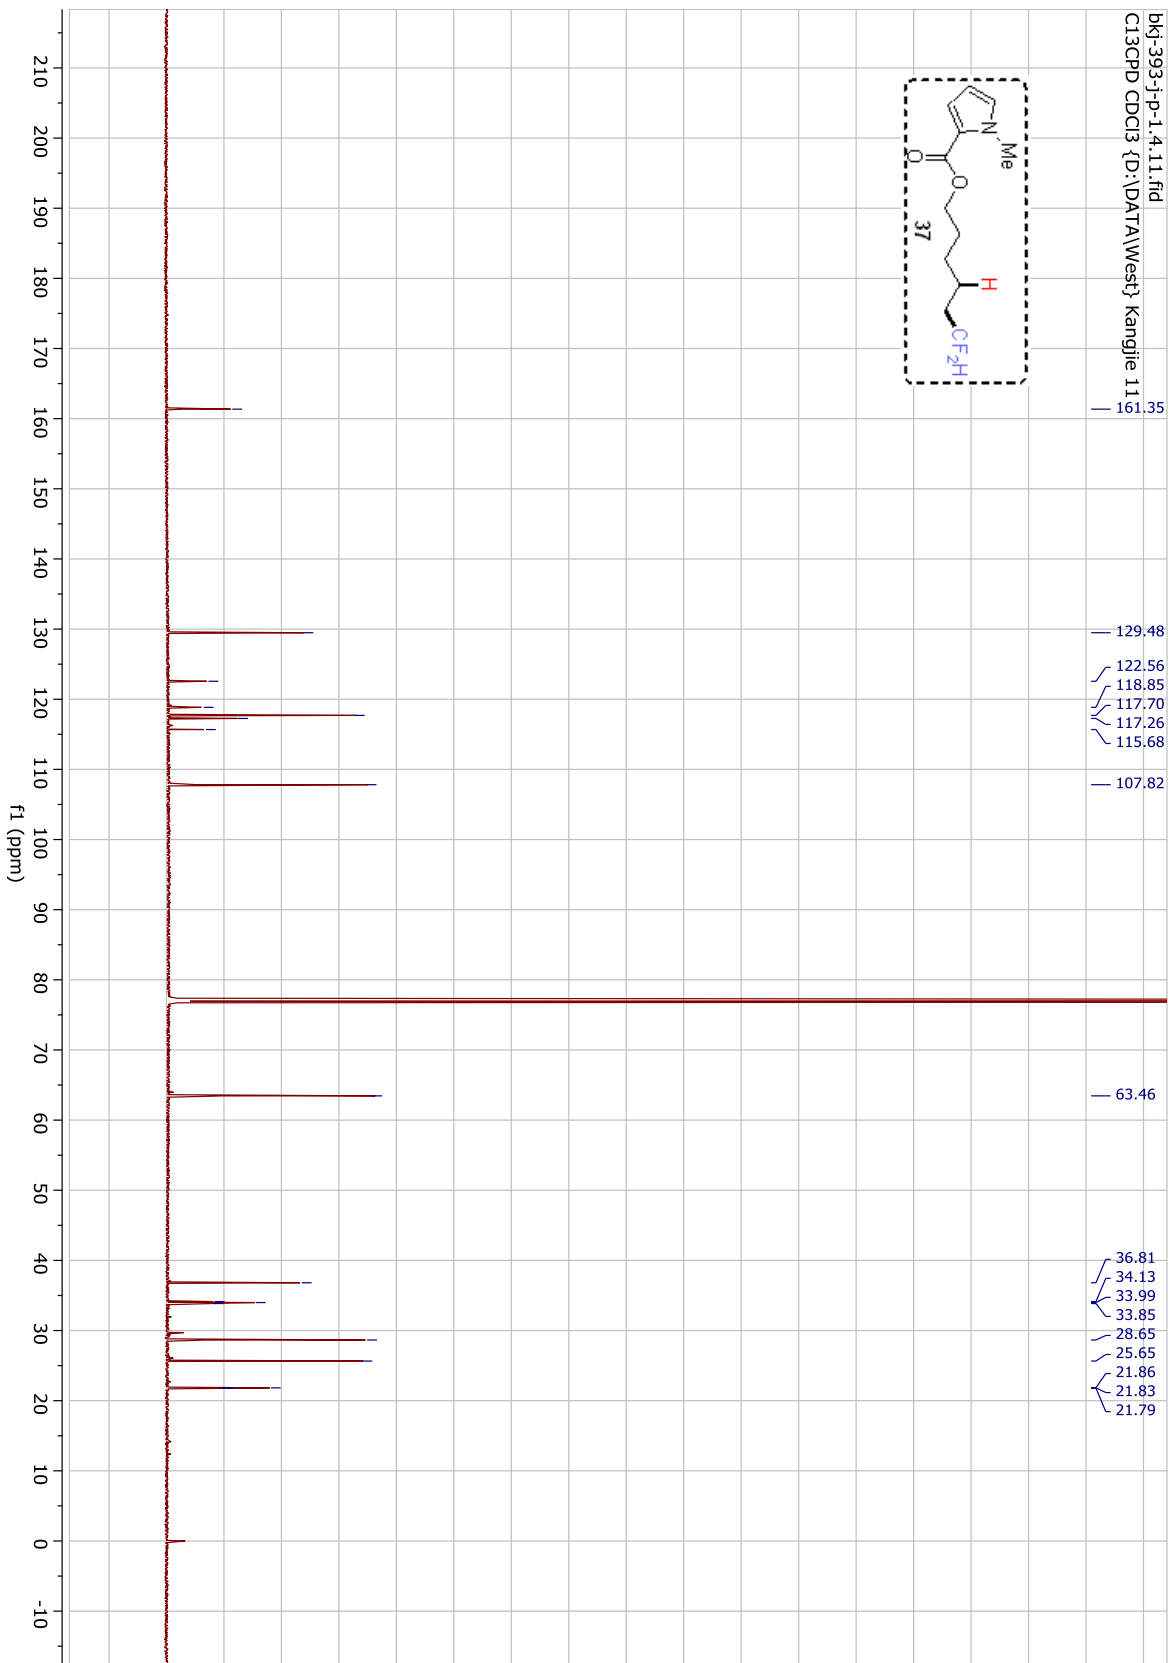

bkj-393-j-p-1.4.12.ftd  
F19\_baseline\_correct ID  
F19\_baseline\_correct CDC13 {D:\DATA\West} Kangjie 11

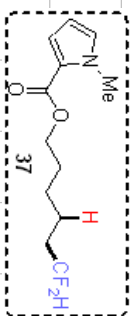

-115.77  
-115.80  
-115.83  
-115.87  
-115.90  
-115.93

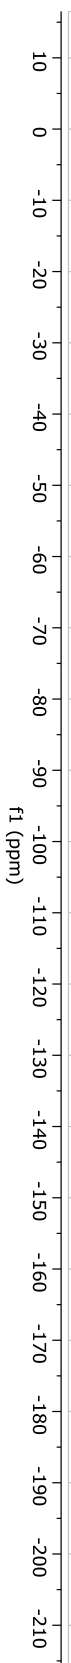

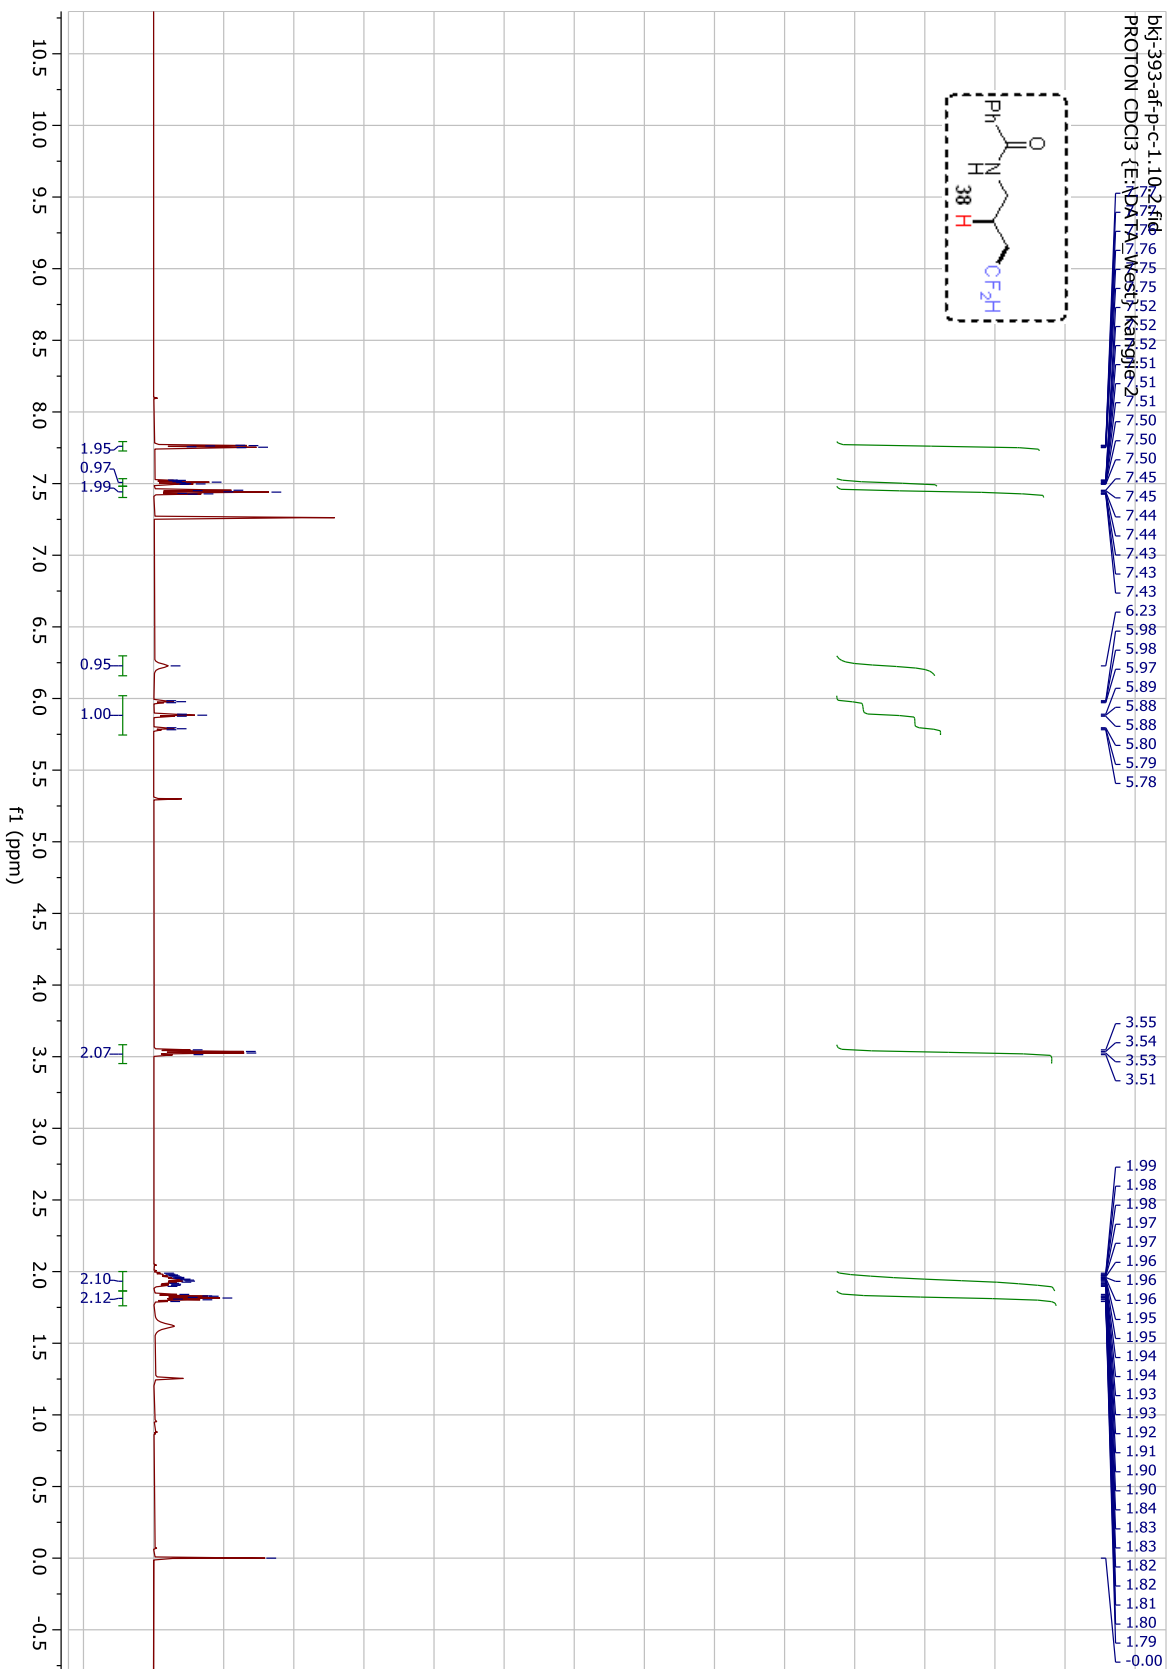

bkj-393-at-p-c-1.10.1.fid  
C13CPD CDCl3 {E:\DATA\_West\Kangjie 2

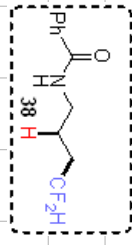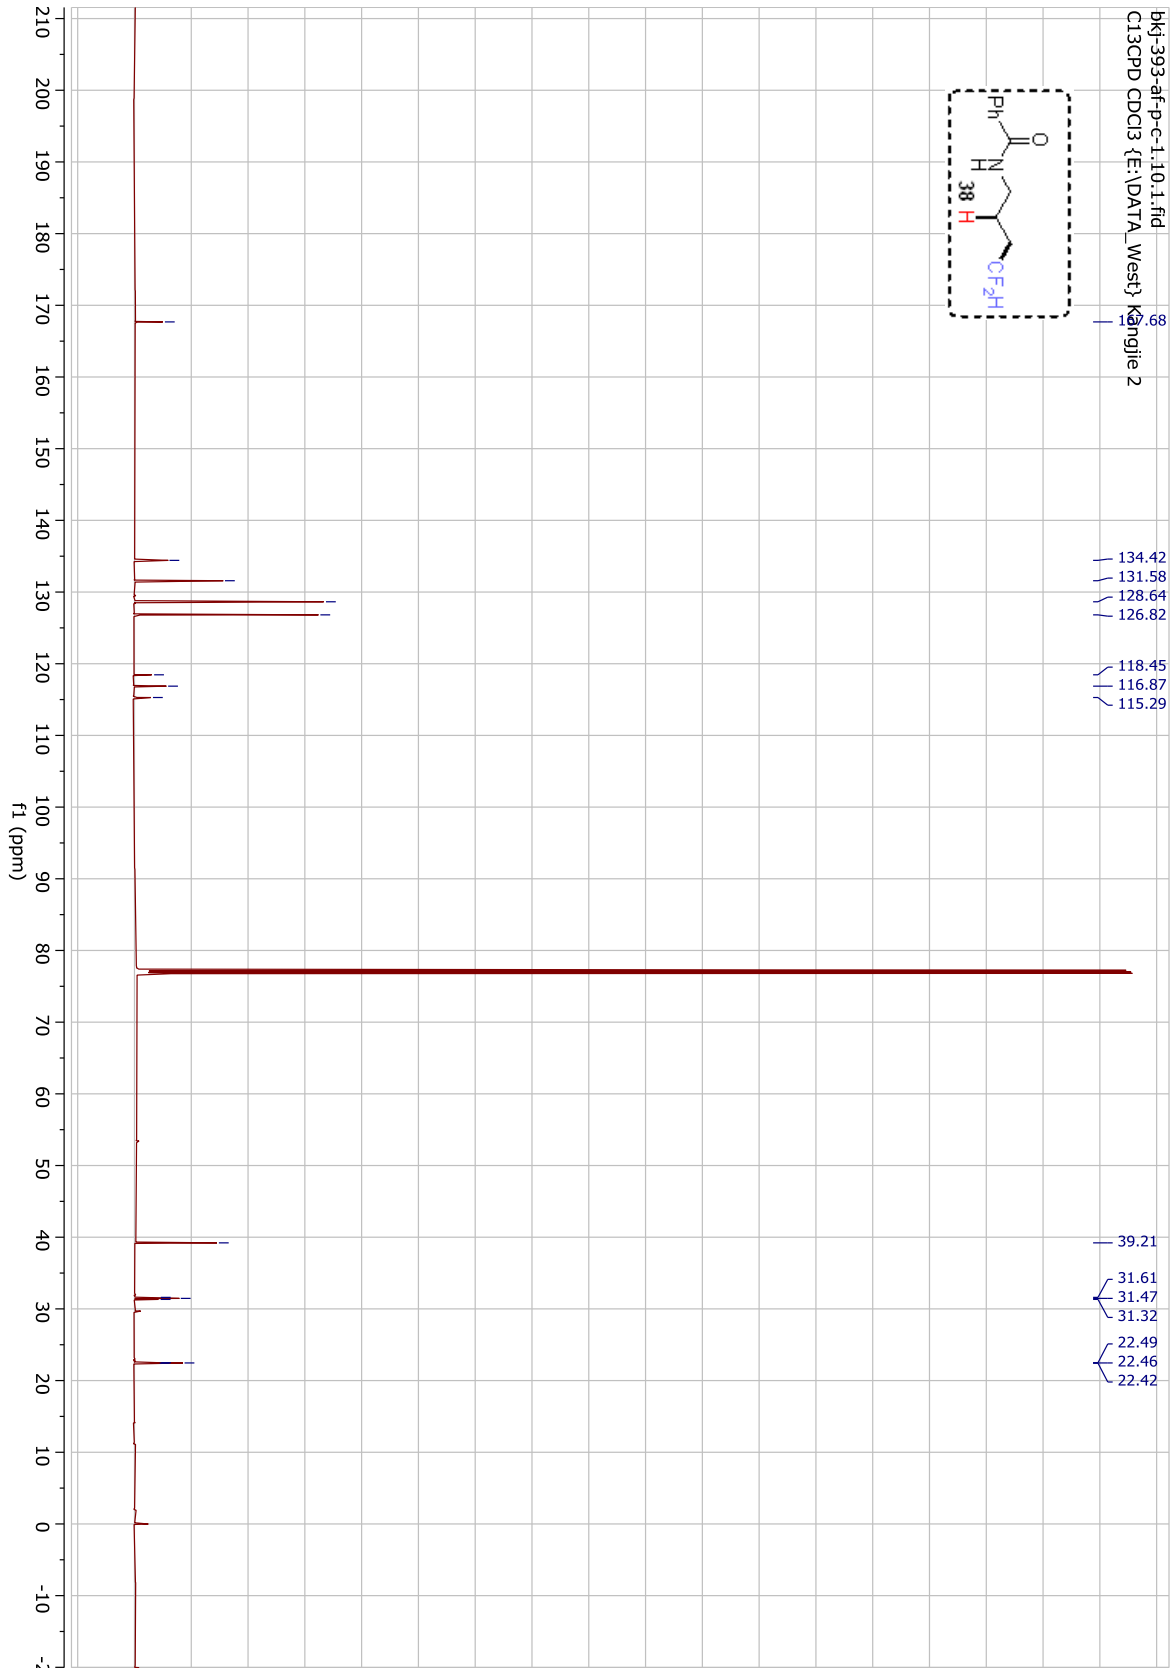

bkj-393-af-p-h-1.9.11.ftd  
F19\_baseline\_correct\_1D  
F19\_baseline\_correct CDC13 {D:\DATA\West} Kangjie 19

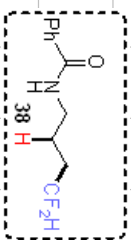

-115.91  
-115.94  
-115.97  
-116.01  
-116.04  
-116.07



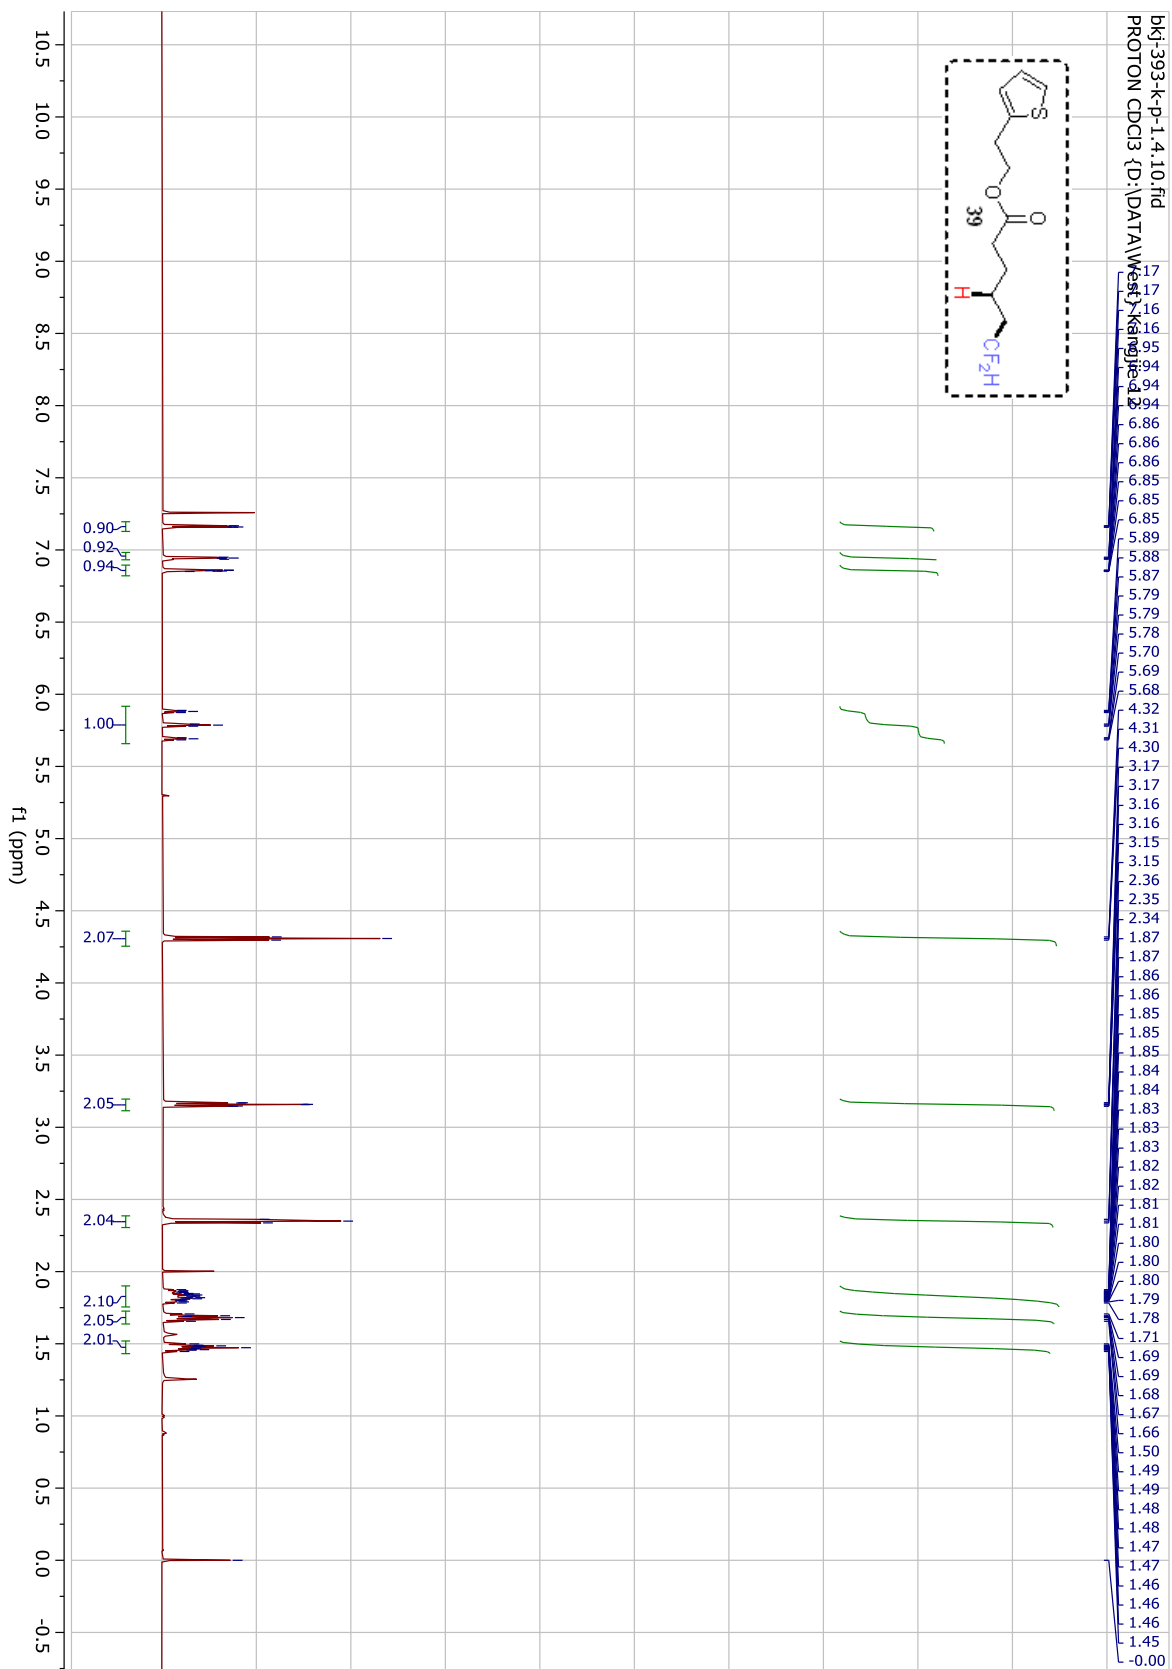

bkj-393-k-p-1,4,11.fid  
C13CPD CDCl3 (D:\DATA\Westj k\ngjle-12

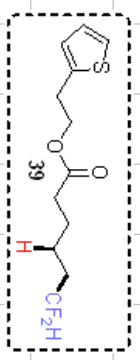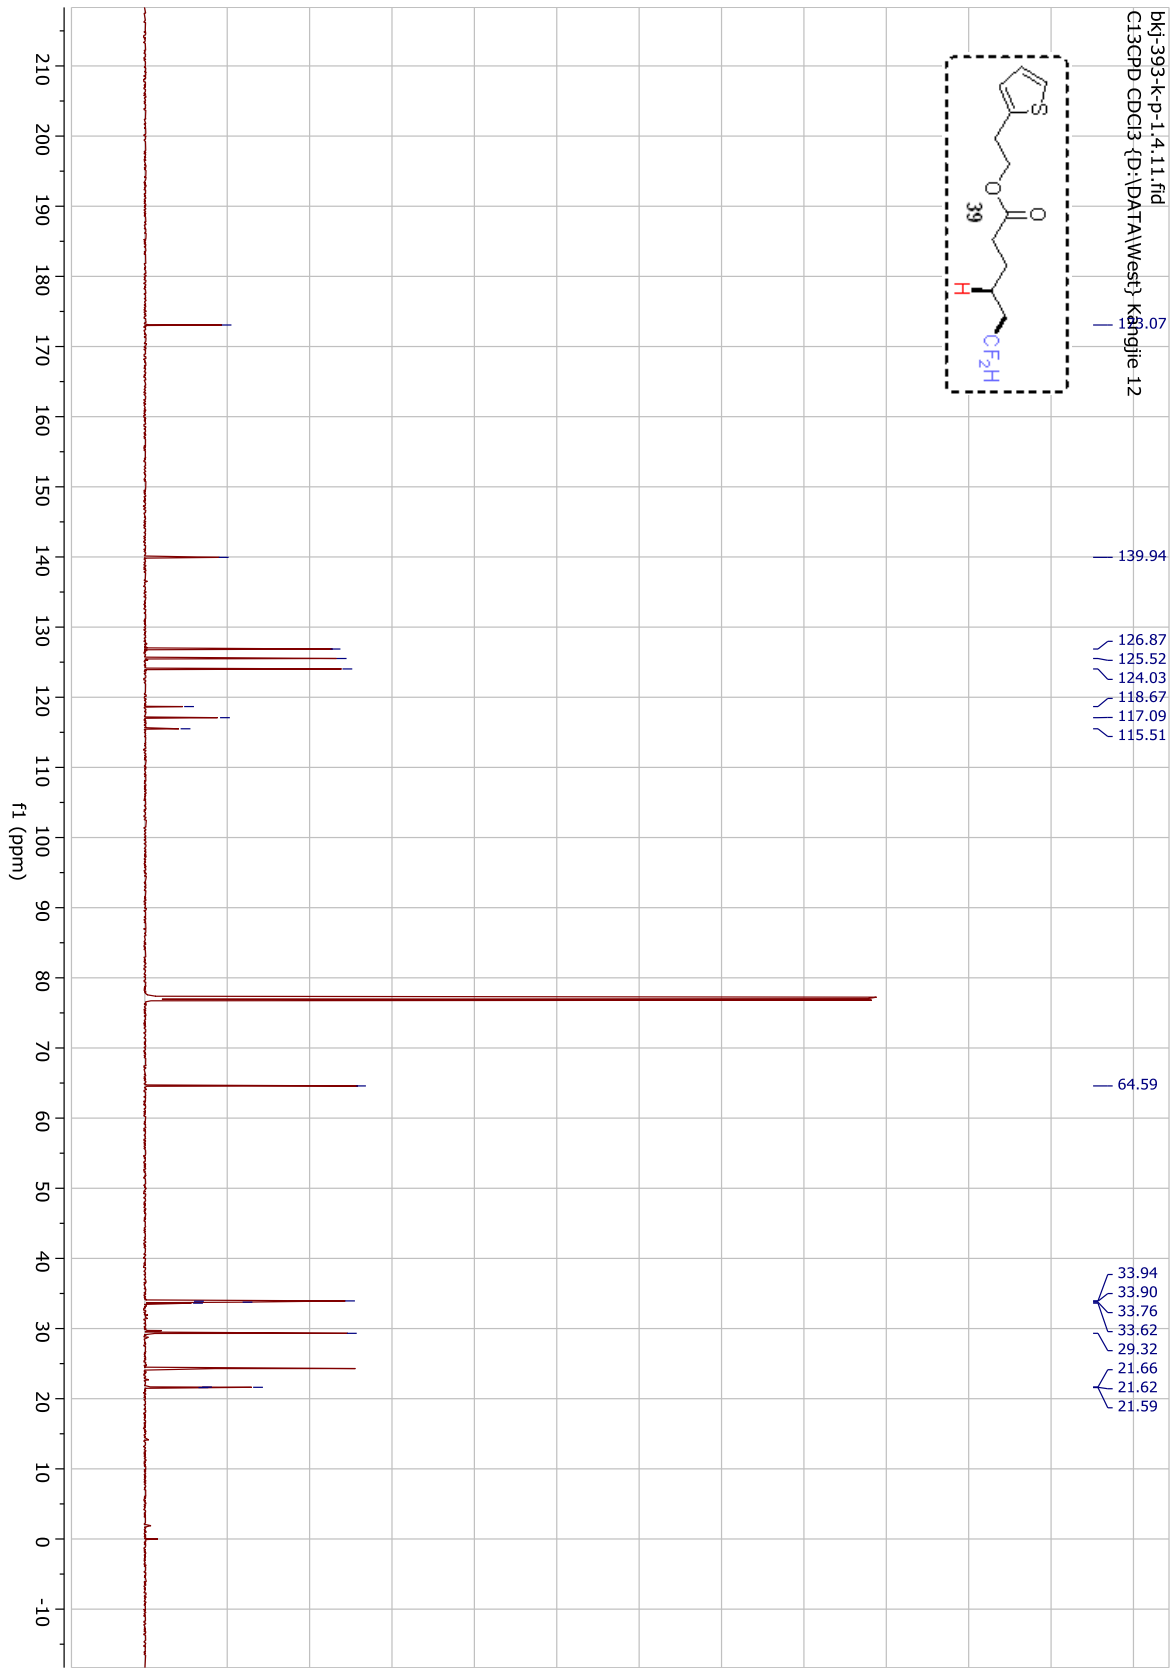

bkj-393-k-p-1-4.12.fid  
F19\_baseline\_correct ID  
F19\_baseline\_correct CDCI3 {D:\DATA\West} Kangjie 12

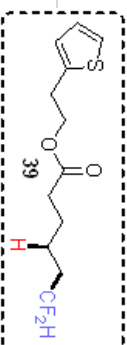

-115.82  
-115.86  
-115.89  
-115.92  
-115.96  
-115.99

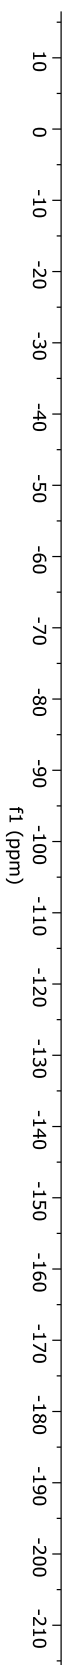



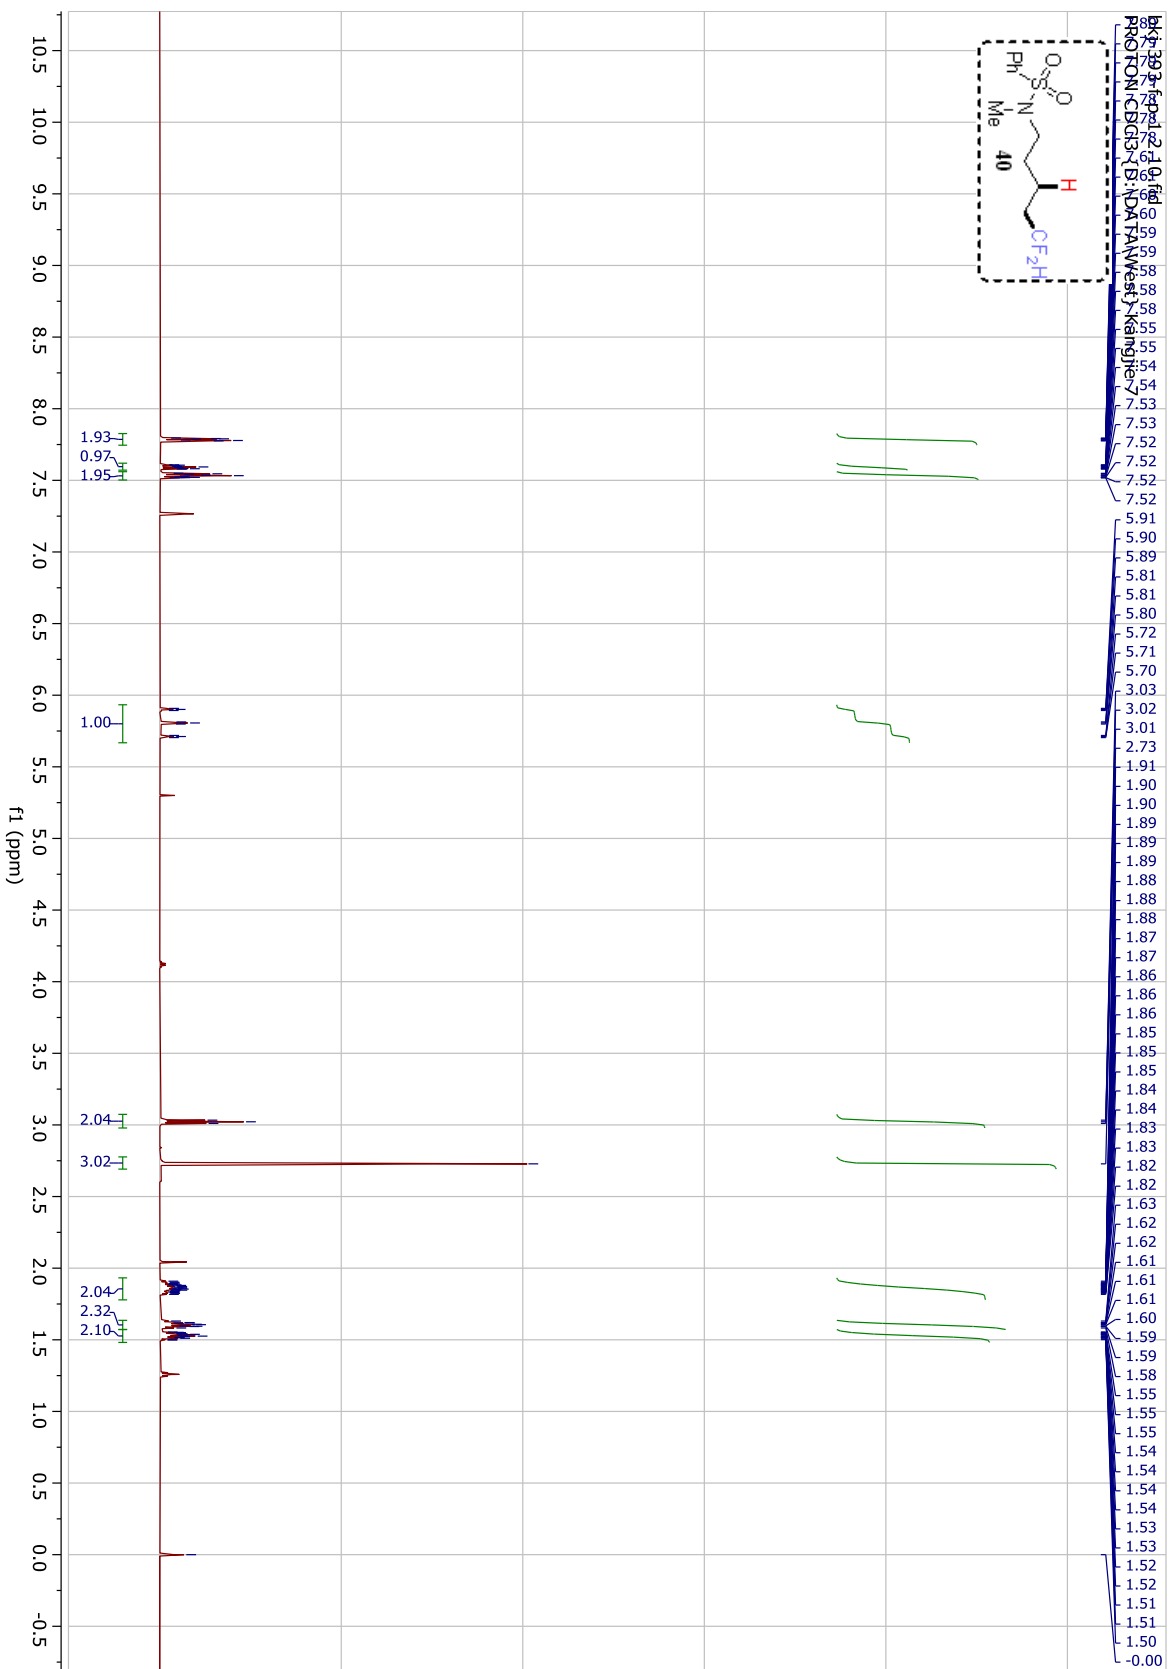

bkt-393-f-p-1.2.11.fid  
C13CPD CDCl3 (D:\DATA\Westj Kangjie 7

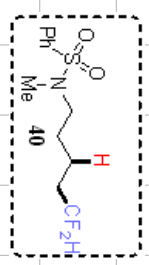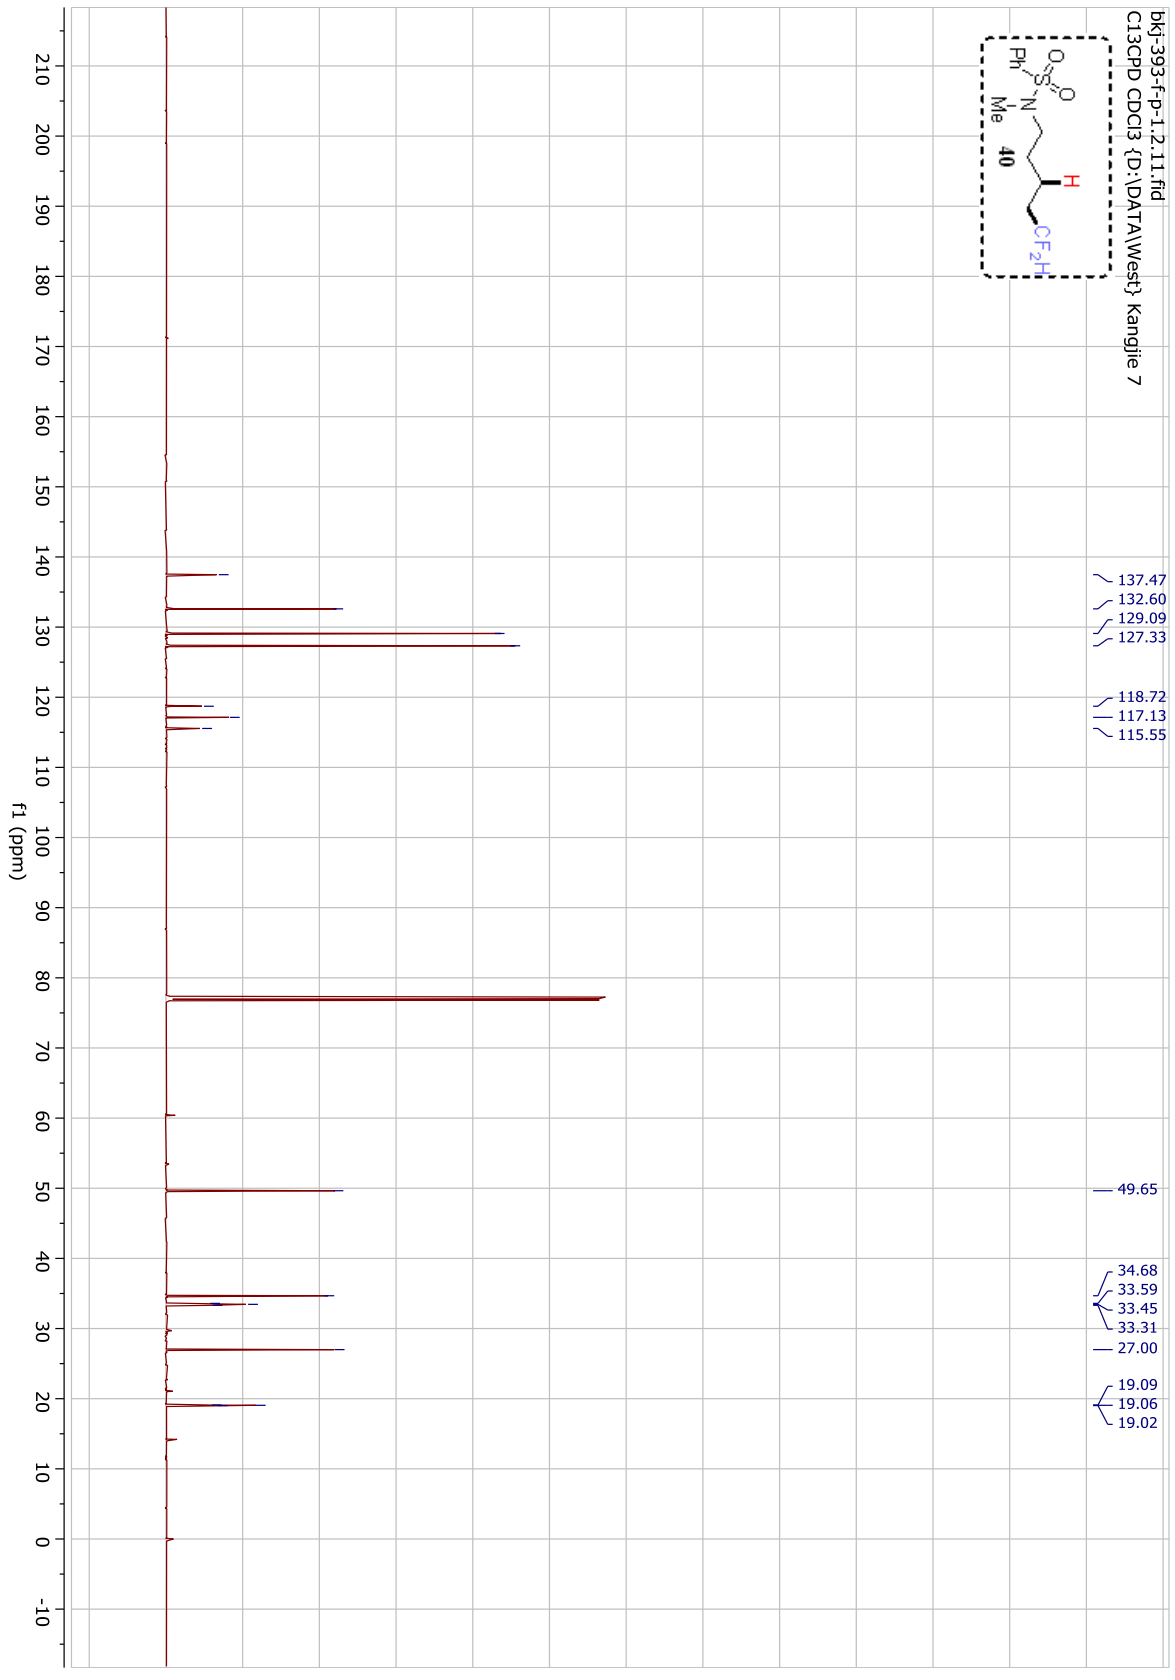

bkj-393-f-p-1.2.12.ftd  
F19\_baseline\_correct ID  
F19\_20120120\_001.D\\DATA\\West\\Kangjie 7

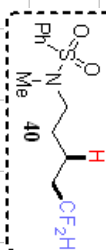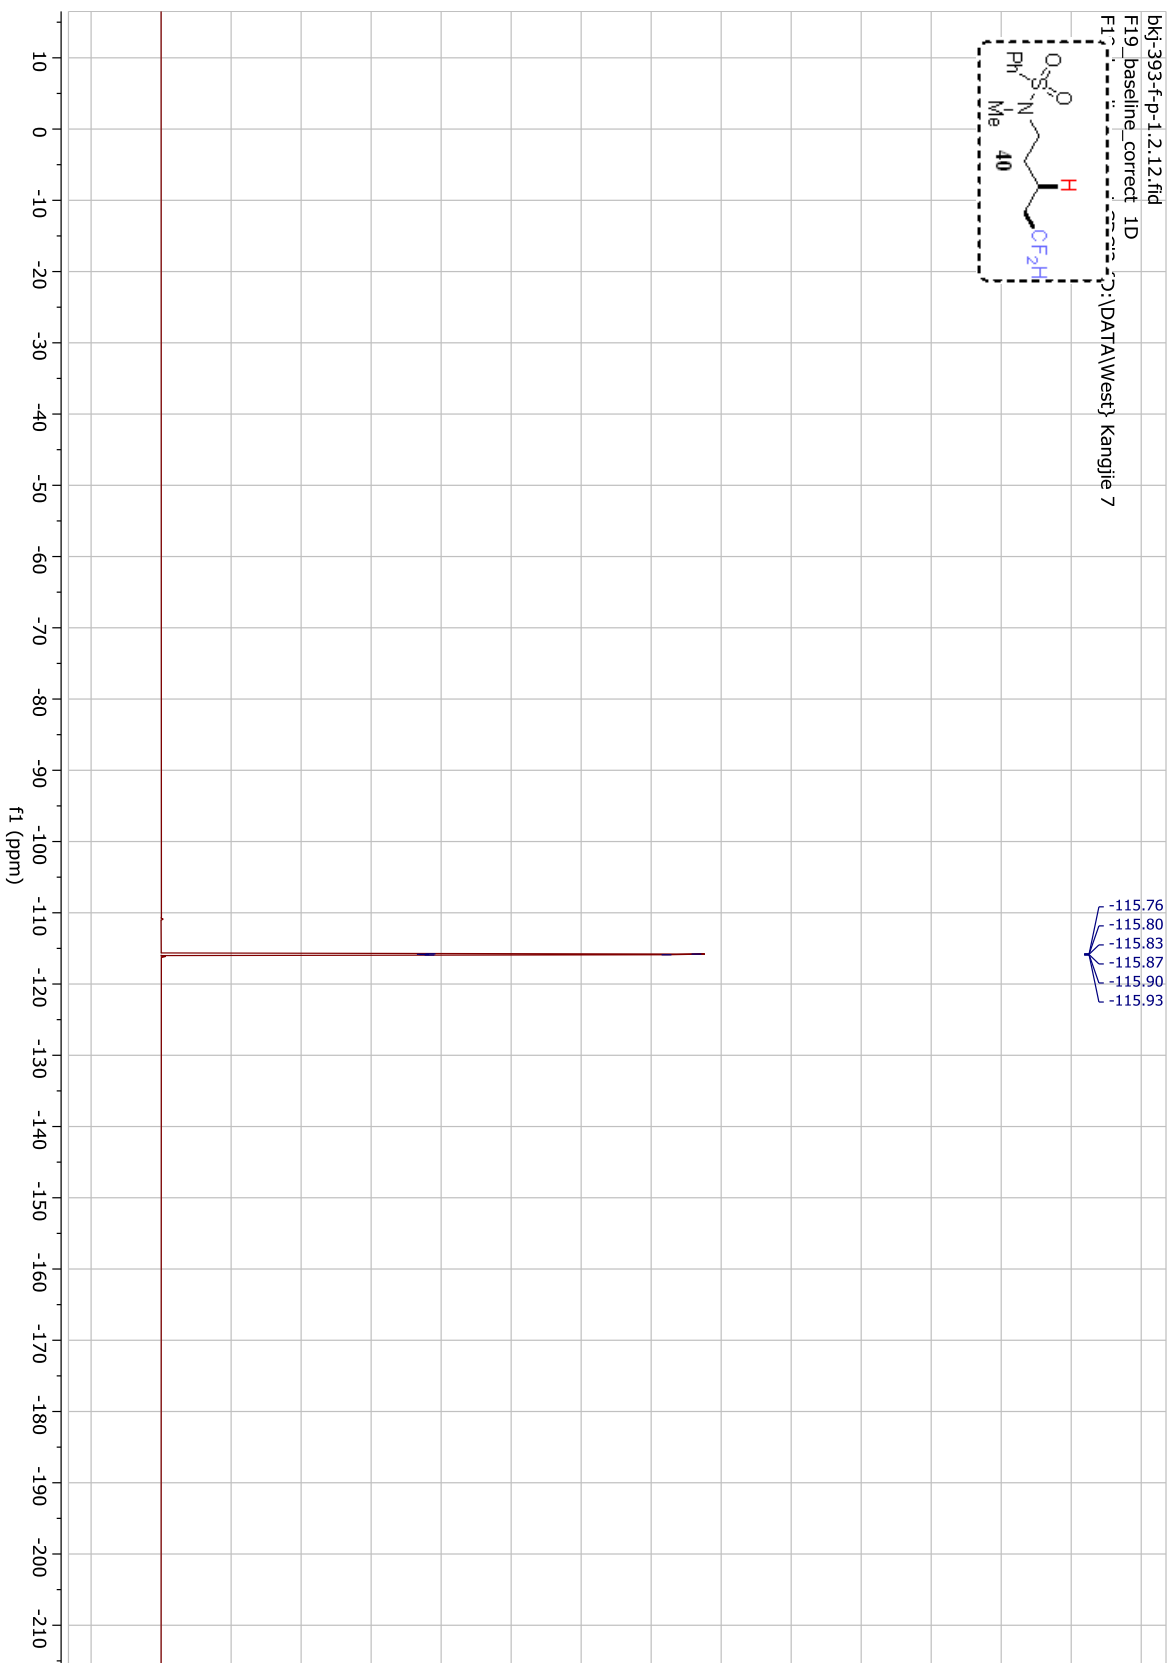



bkj-393-g-p-1-5-11.fid  
C13CPD CDCl3 (D:\DATA\Westj Kangjie 5

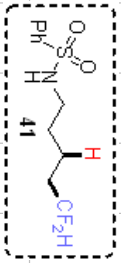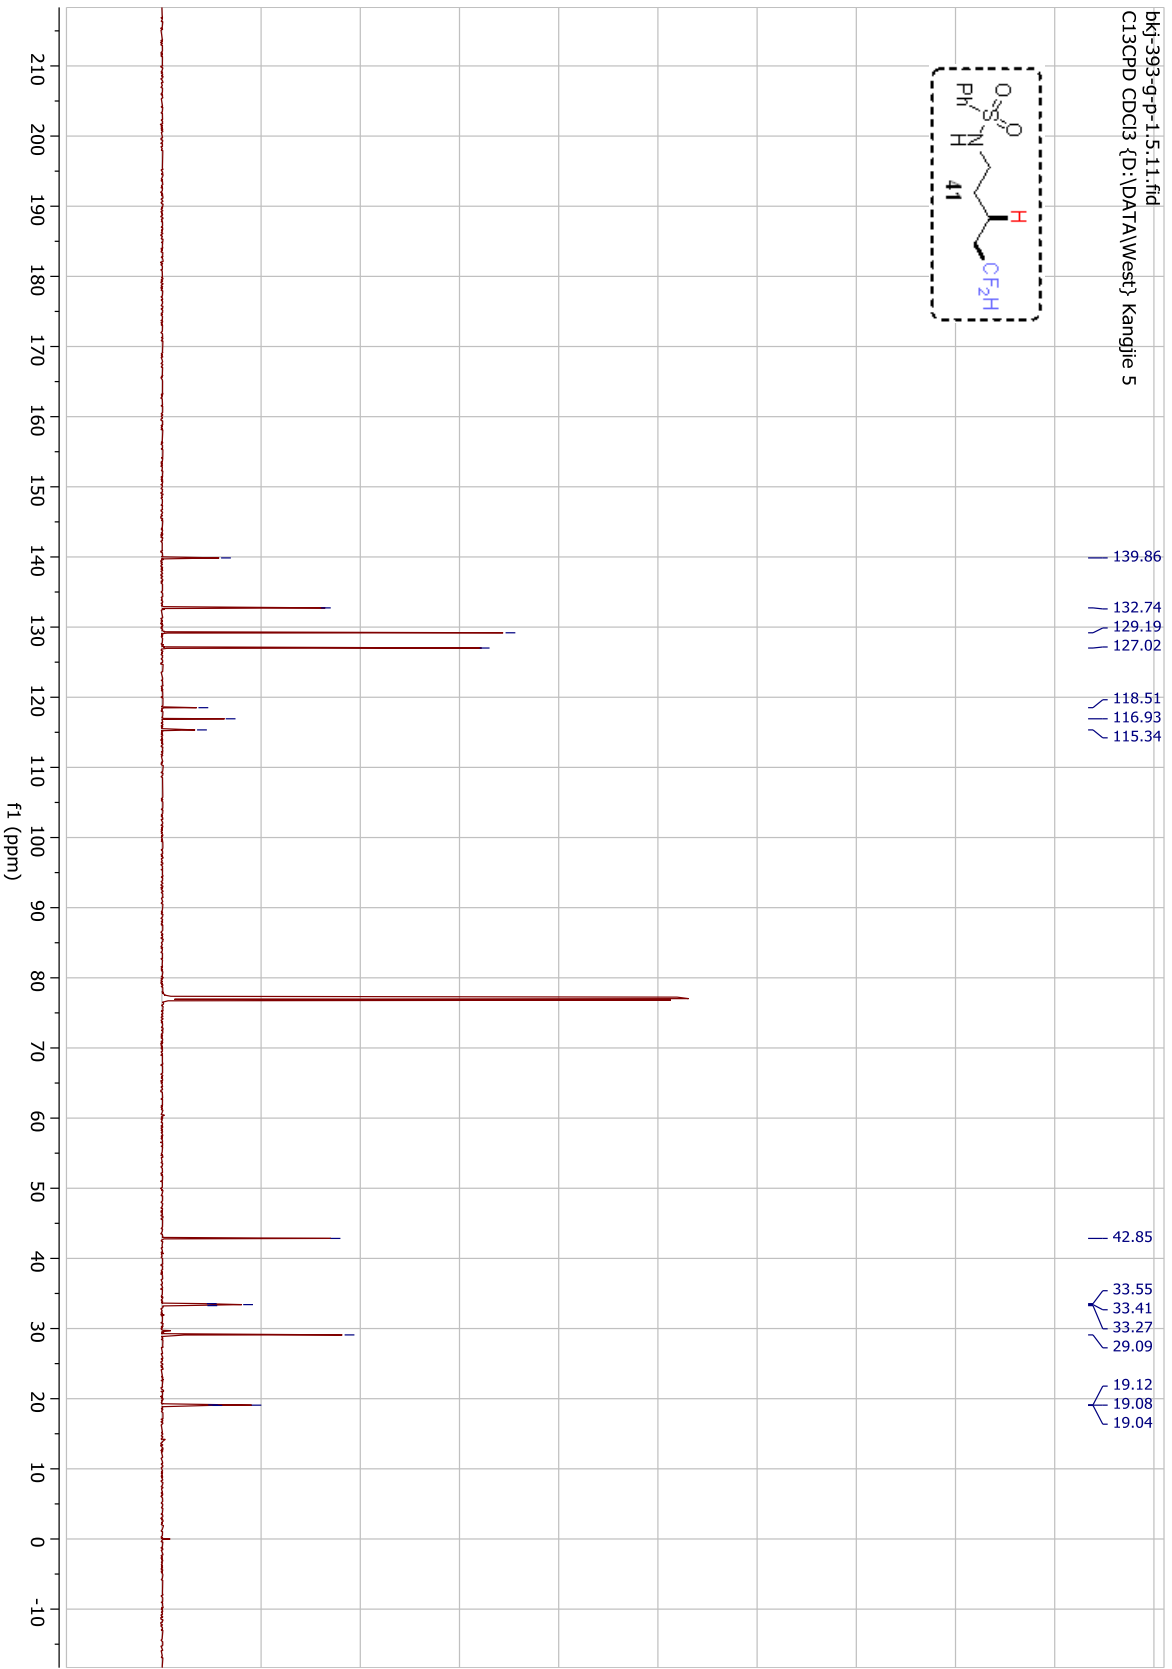

bkj-393-g-p-1.5.12.fid  
F19\_baseline\_correct ID  
F19\_baseline\_correct CDCI3 {D:\DATA\West} Kangjie 5

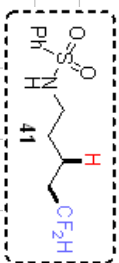

-115.97  
-116.00  
-116.00  
-116.03  
-116.07  
-116.10  
-116.14

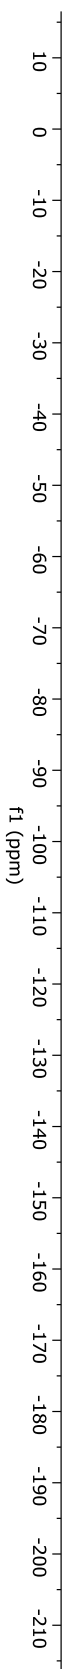

bk1-393-r-p-h-1-7.10.fid  
PROTON CDCl3 {D:\DATA\West\Kangjie 10

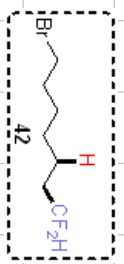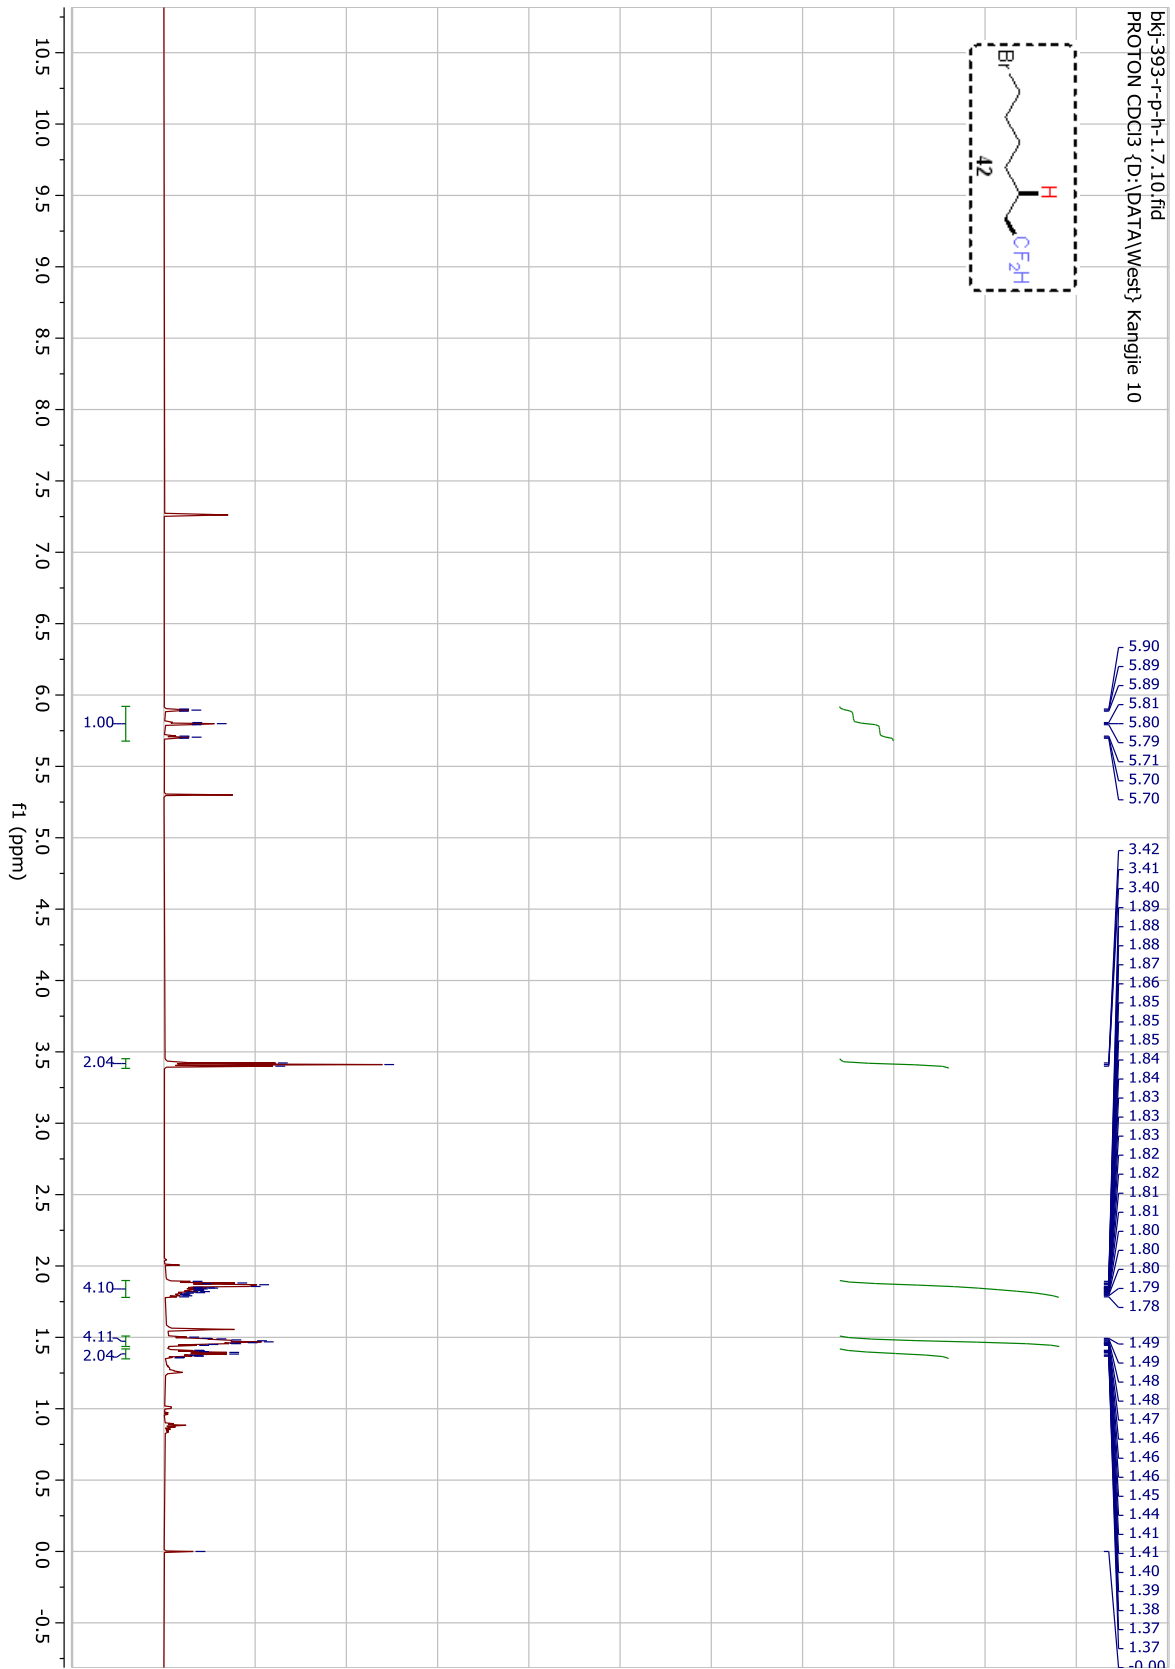

bkt-393-r-p-c-1.7.10.fid  
C13CPD CDCl3 (D:\DATA\Westj) Kangle 10

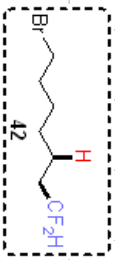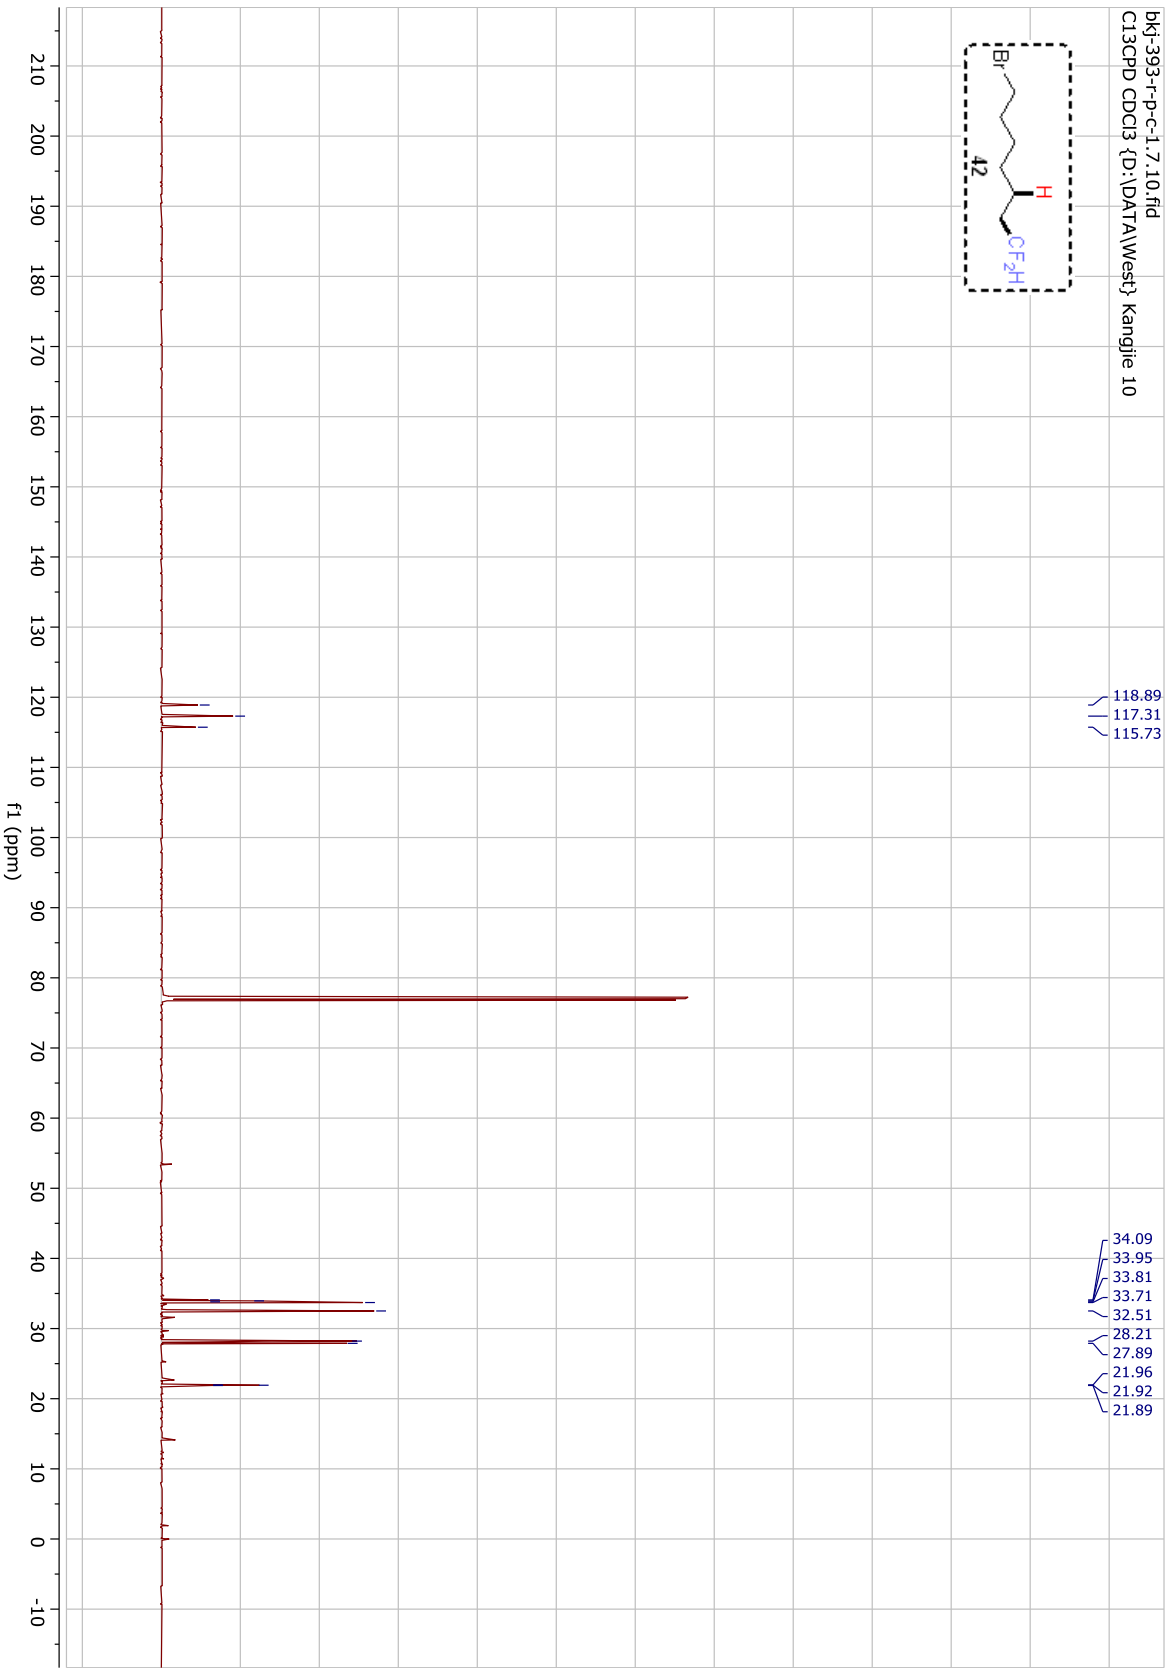



bkj-393-r-p-h-1-7.11.fid  
F19\_baseline\_correct\_1D  
F19\_baseline\_correct CDC13 {D:\DATA\West\ Kangjie 10

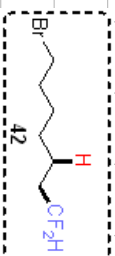

-115.76  
-115.80  
-115.83  
-115.87  
-115.90  
-115.93



bj1-393-ae-p-h-1.9.10.fid  
PROTON CDCl3 {D:\DATA\West\Kangjie 18

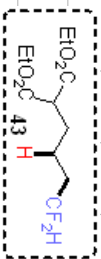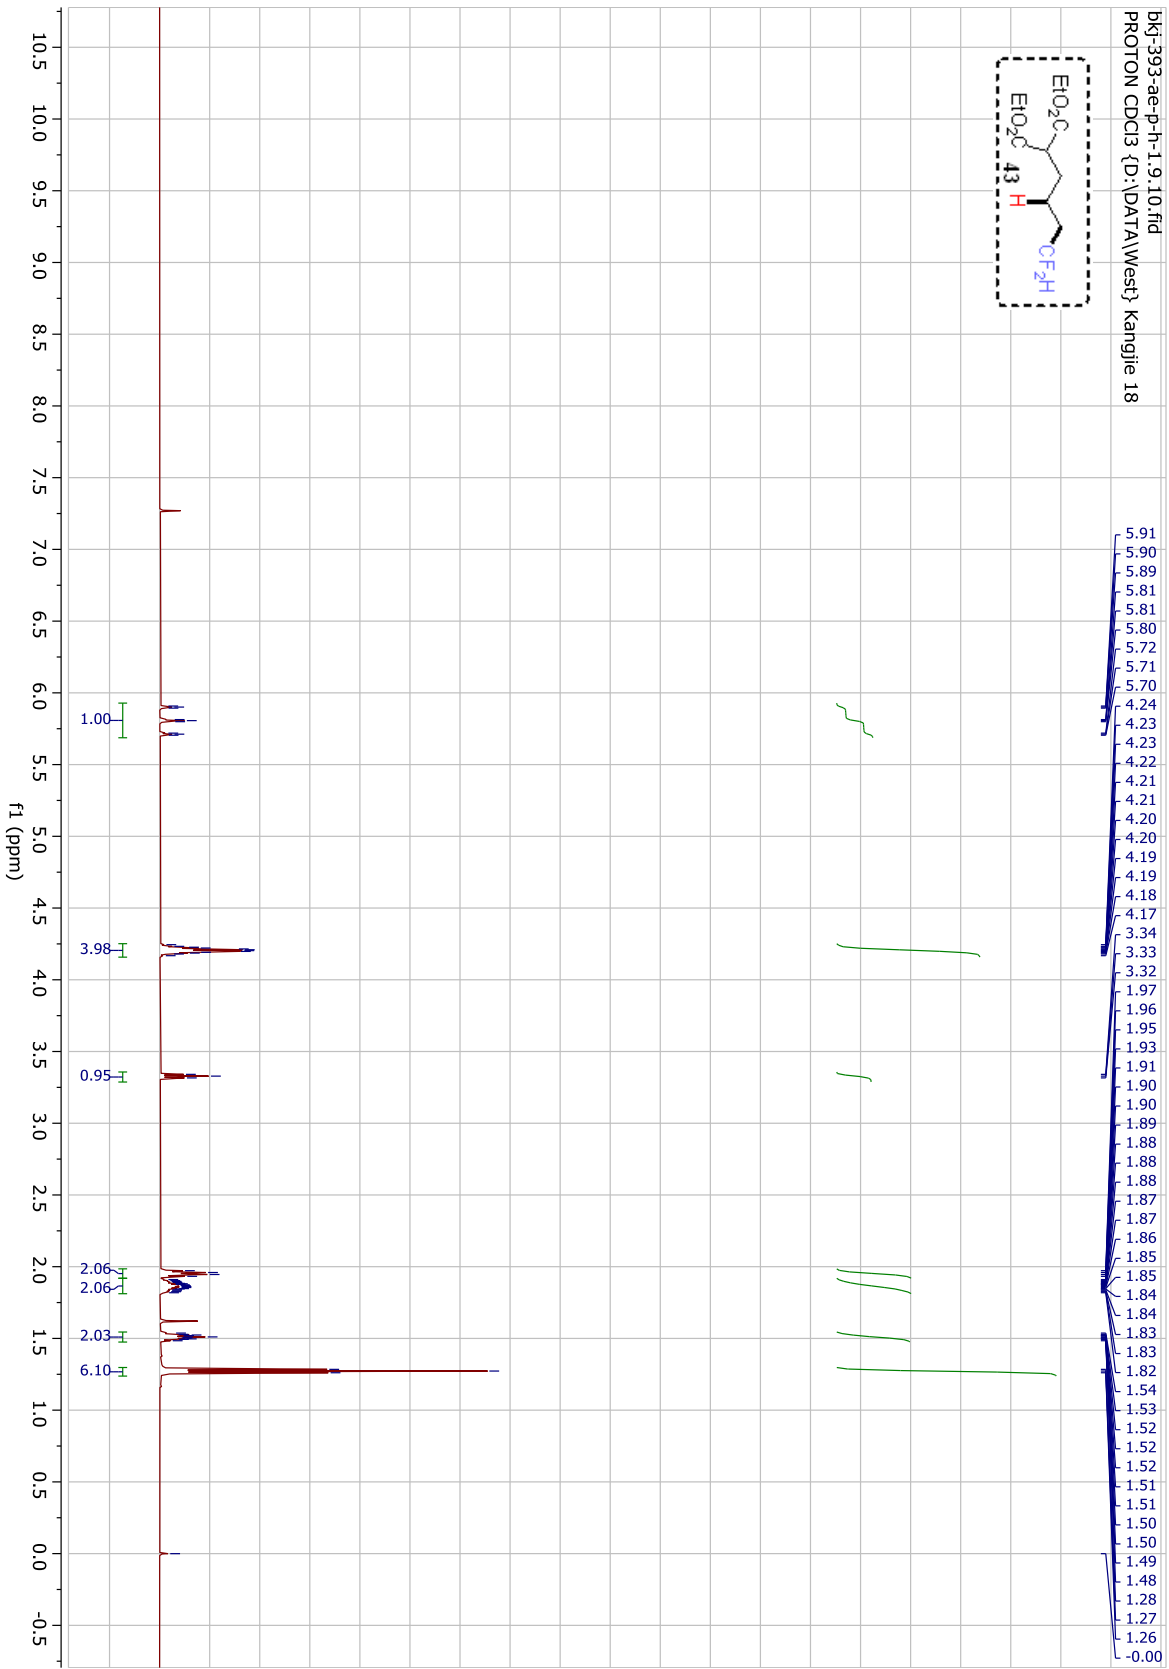

bjt-393-ae-p-c-1.10.1.fid  
C13CPD CDCl3 (E:\DATA\_West\ Kang) 1

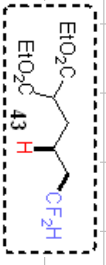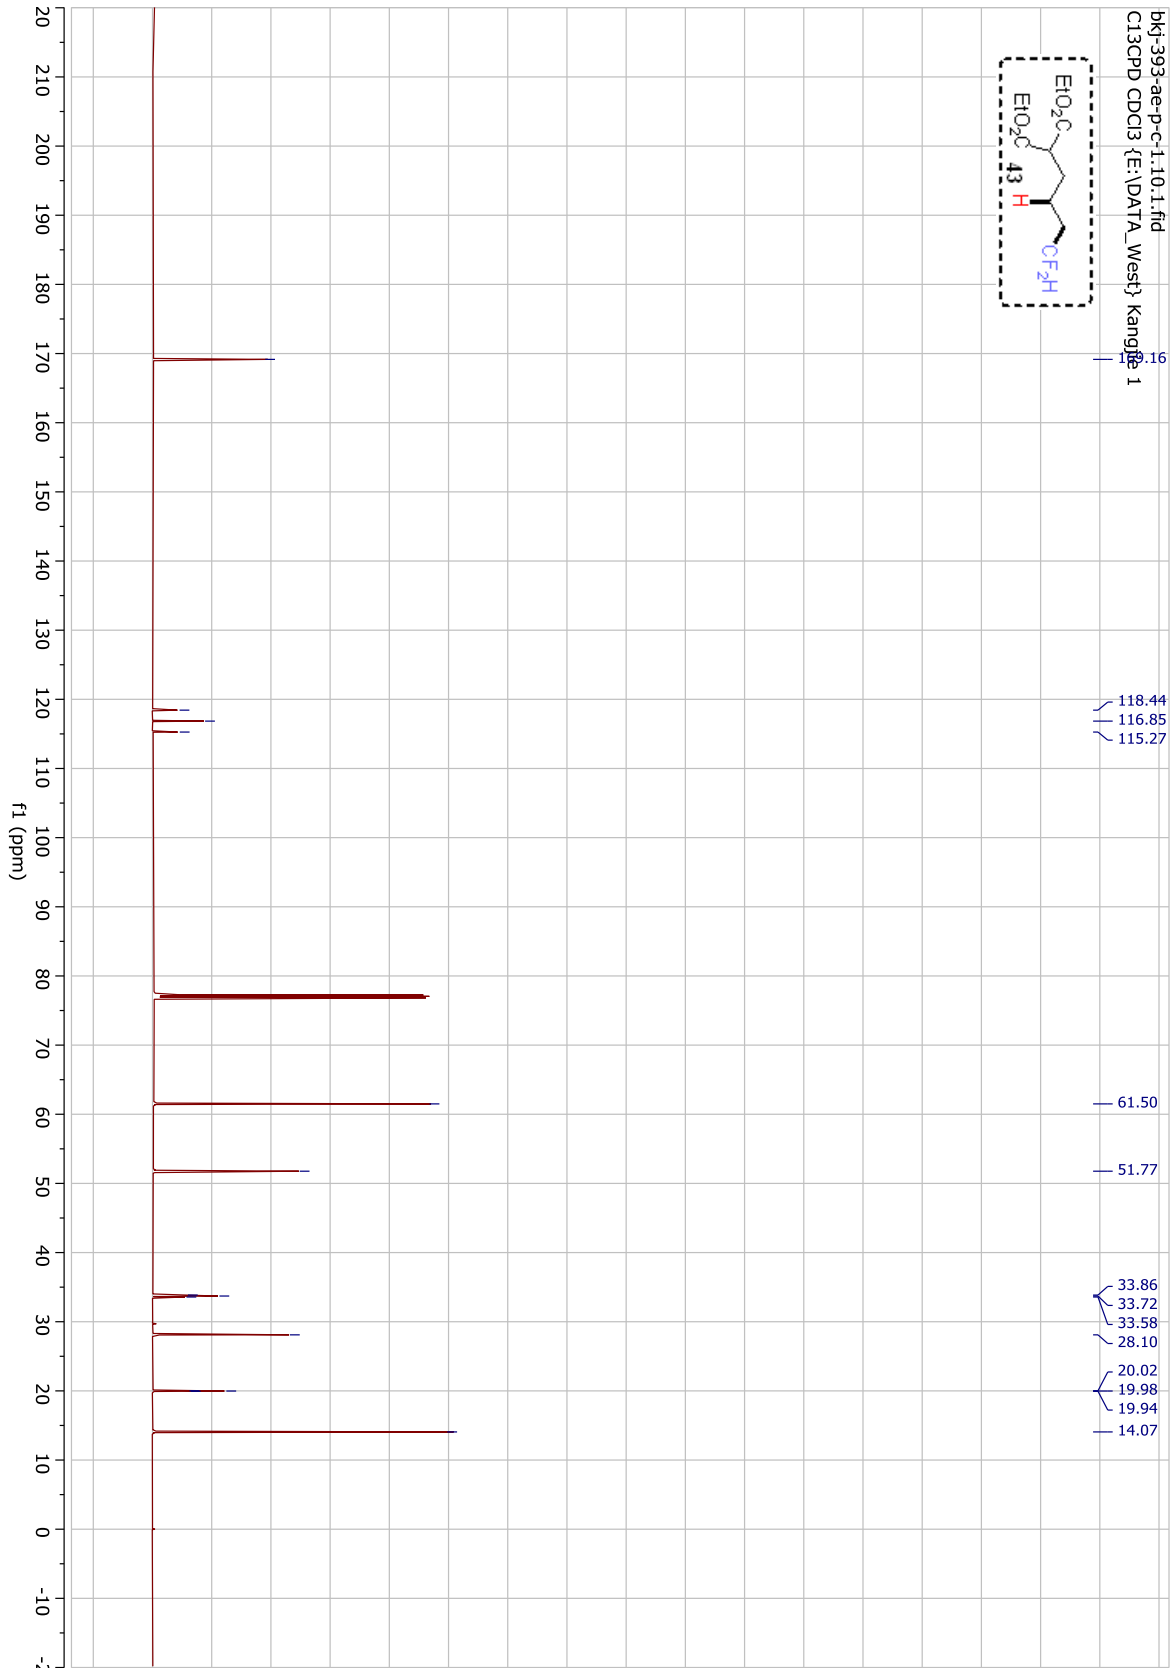

bk1-393-ae-p-h-1.9.11.fid  
F19\_baseline\_correct ID  
F19\_baseline\_correct CDCl3 {D:\DATA\West\ Kangjie 18

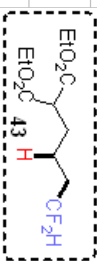

-116.04  
-116.07  
-116.10  
-116.14  
-116.17  
-116.20



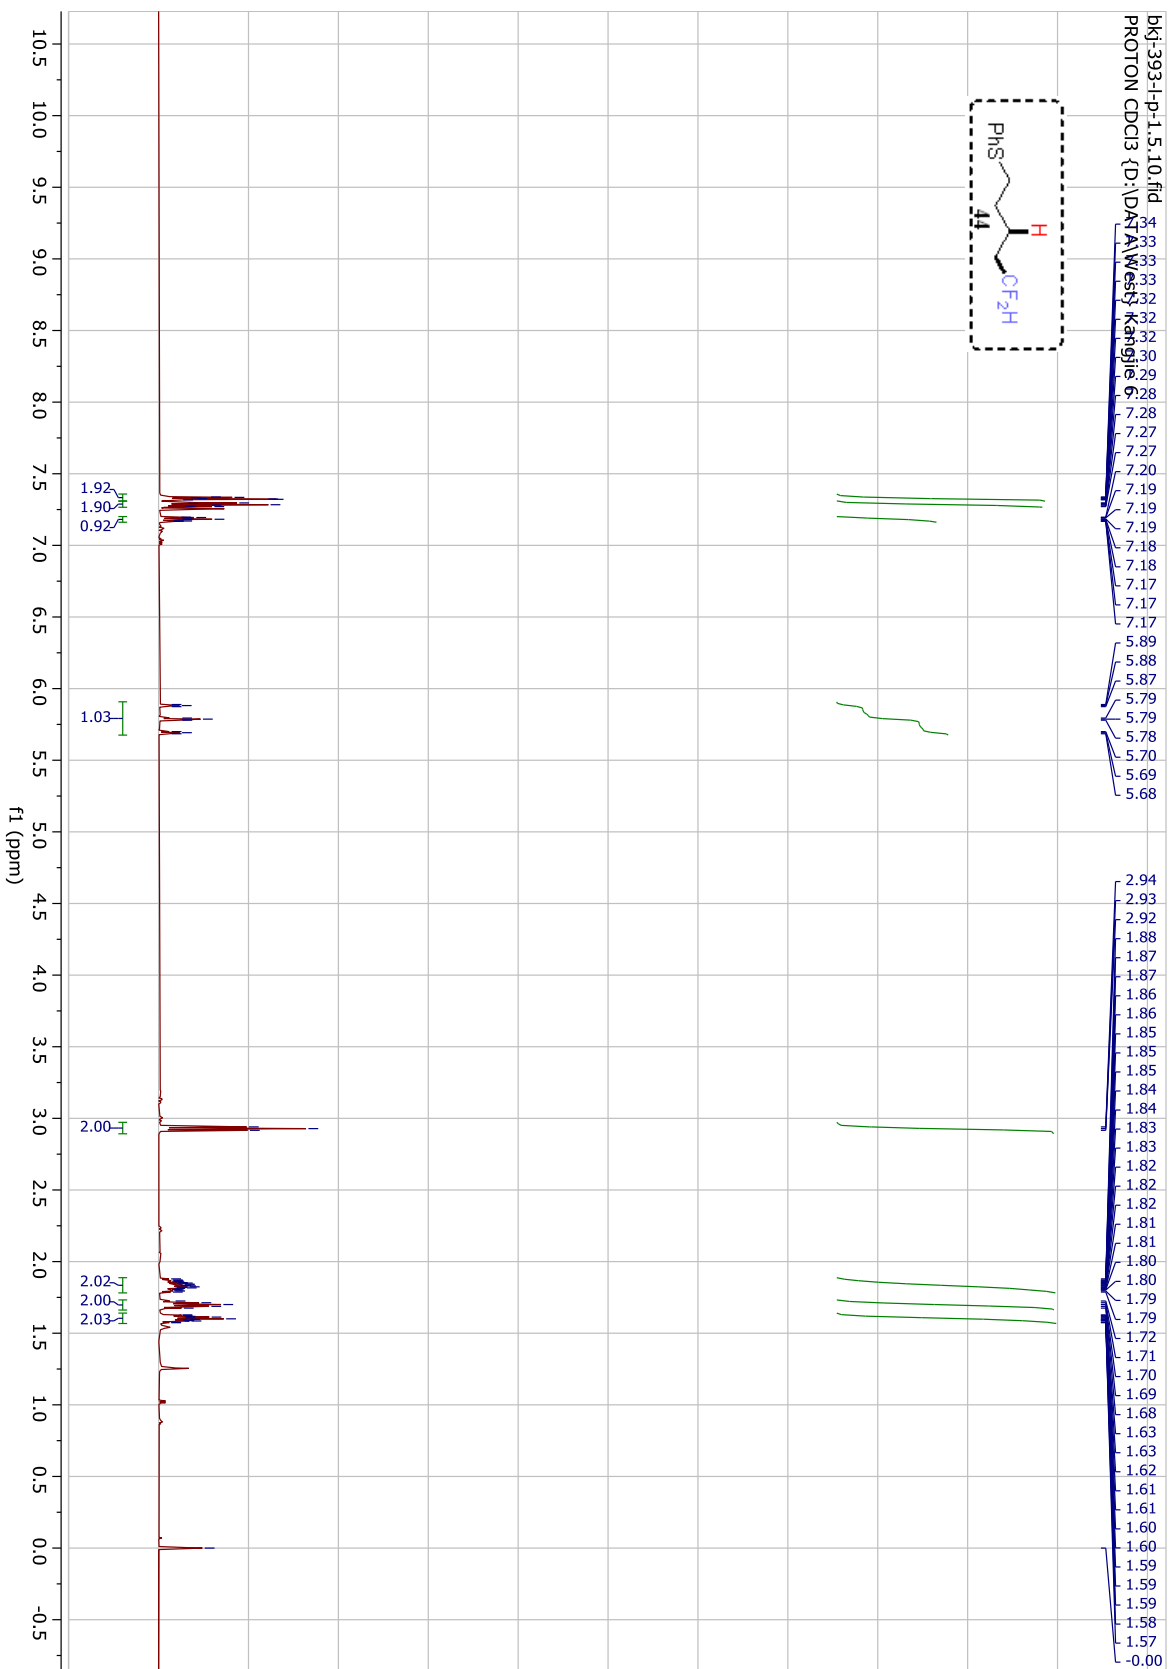

bjl-393-l-p-1-5-11.fid  
C13CPD CDCl3 (D:\DATA\Westj Kangjie 6

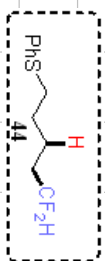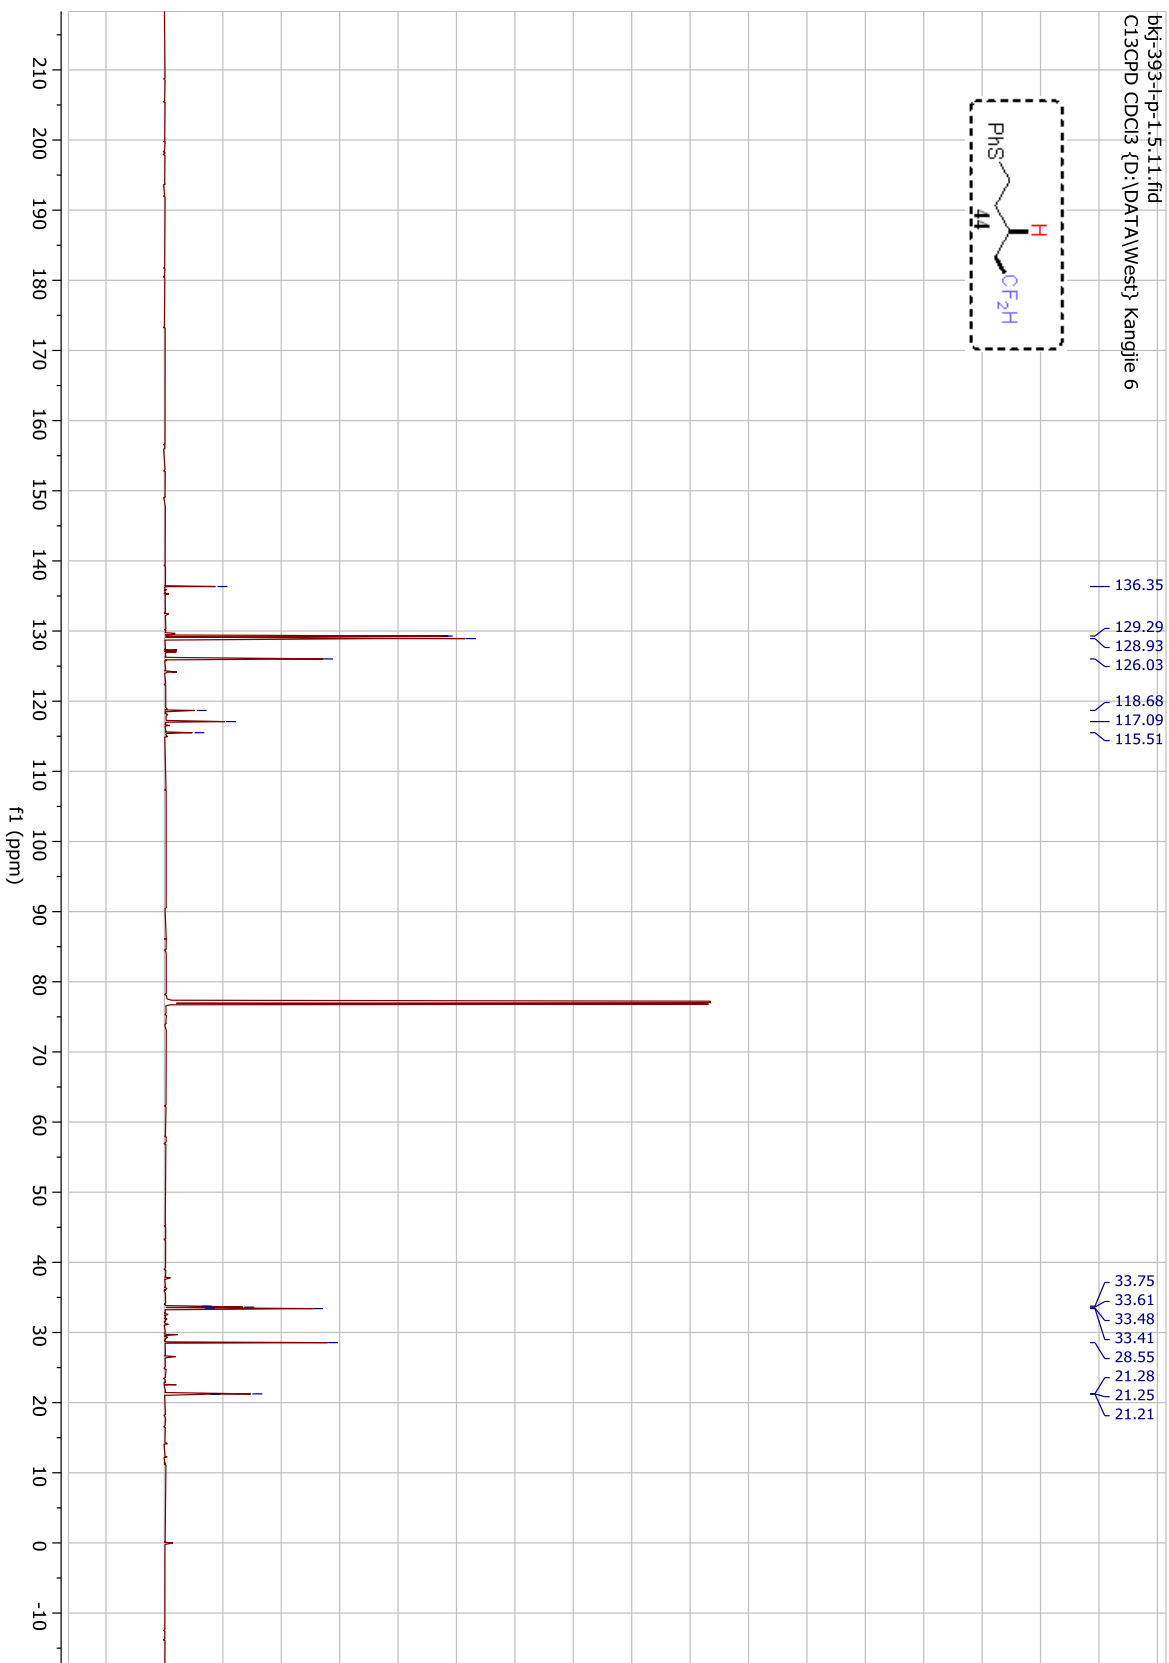

bkj-393-l-p-1.5.12.fid  
F19\_baseline\_correct 1D  
F19\_baseline\_correct CDC13 {D:\DATA\West} Kangjie 6

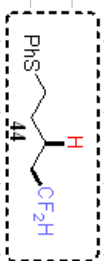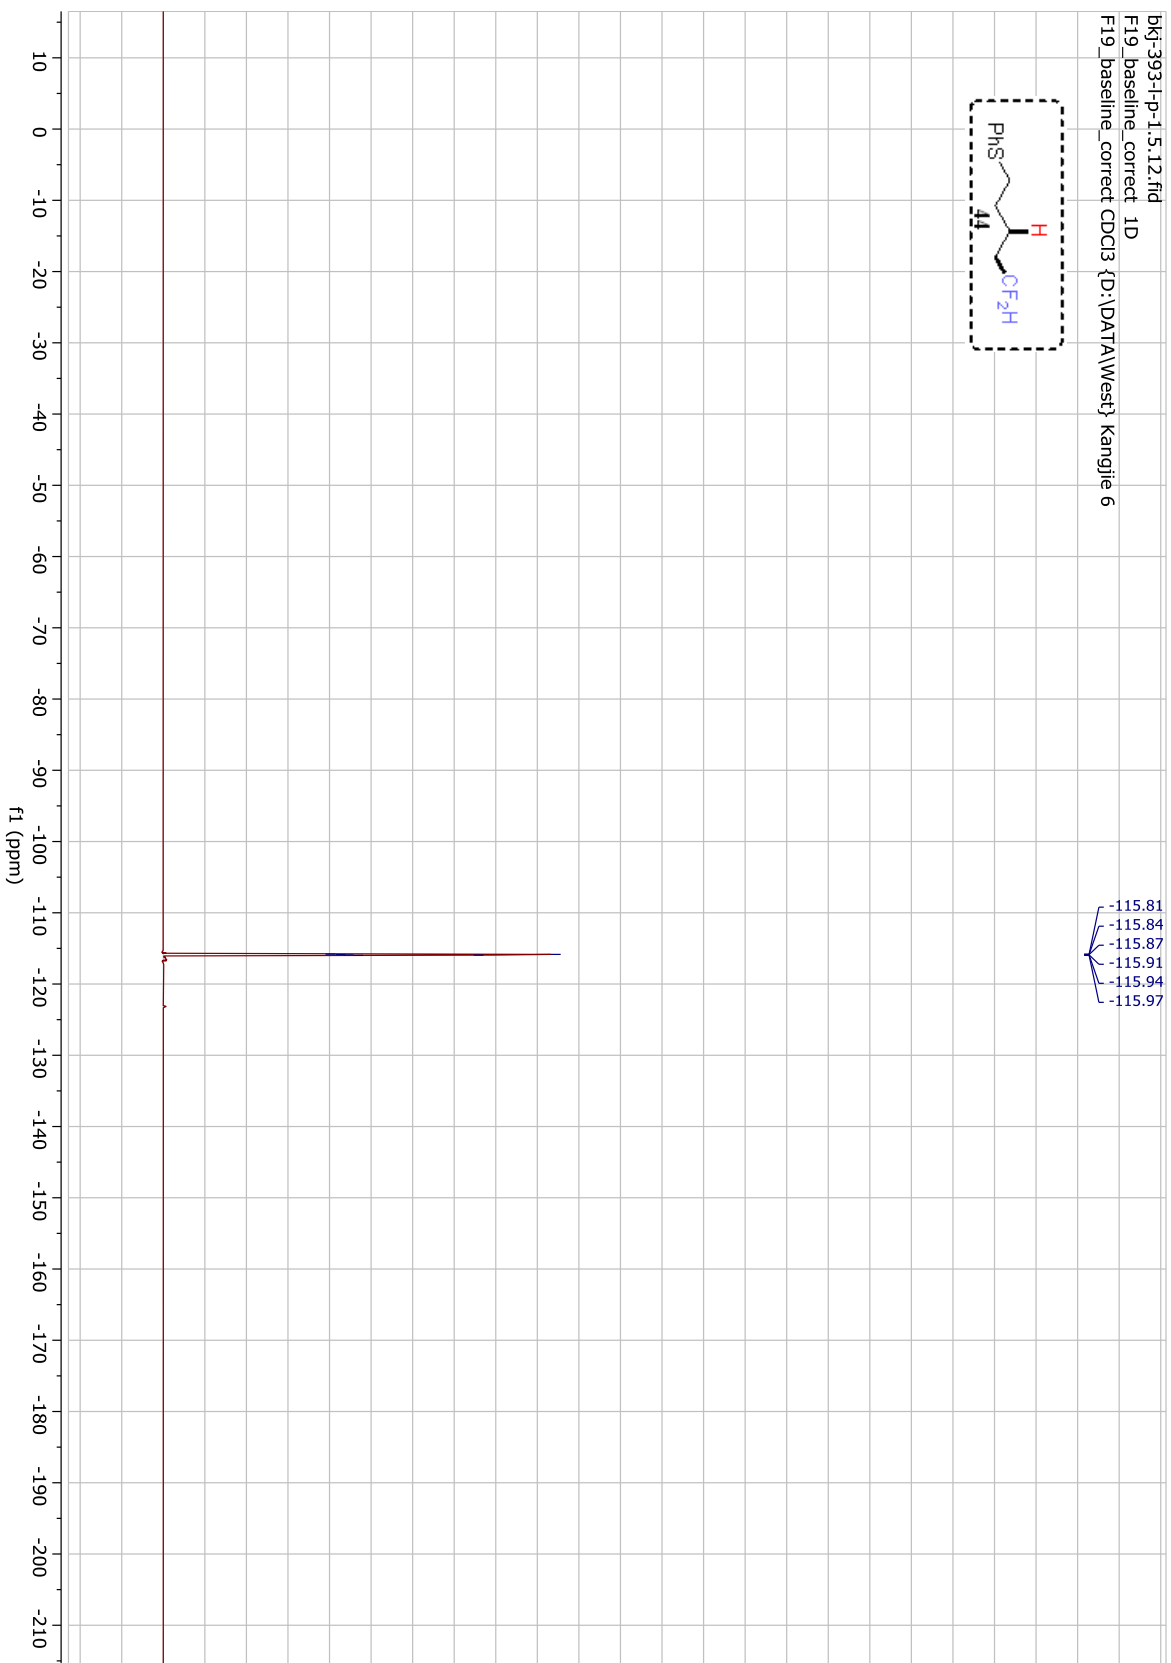

bkl-393-s-p-1-5-10.fid  
PROTON CDCl3 {D:\DATA\West\ Kangjie 19

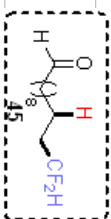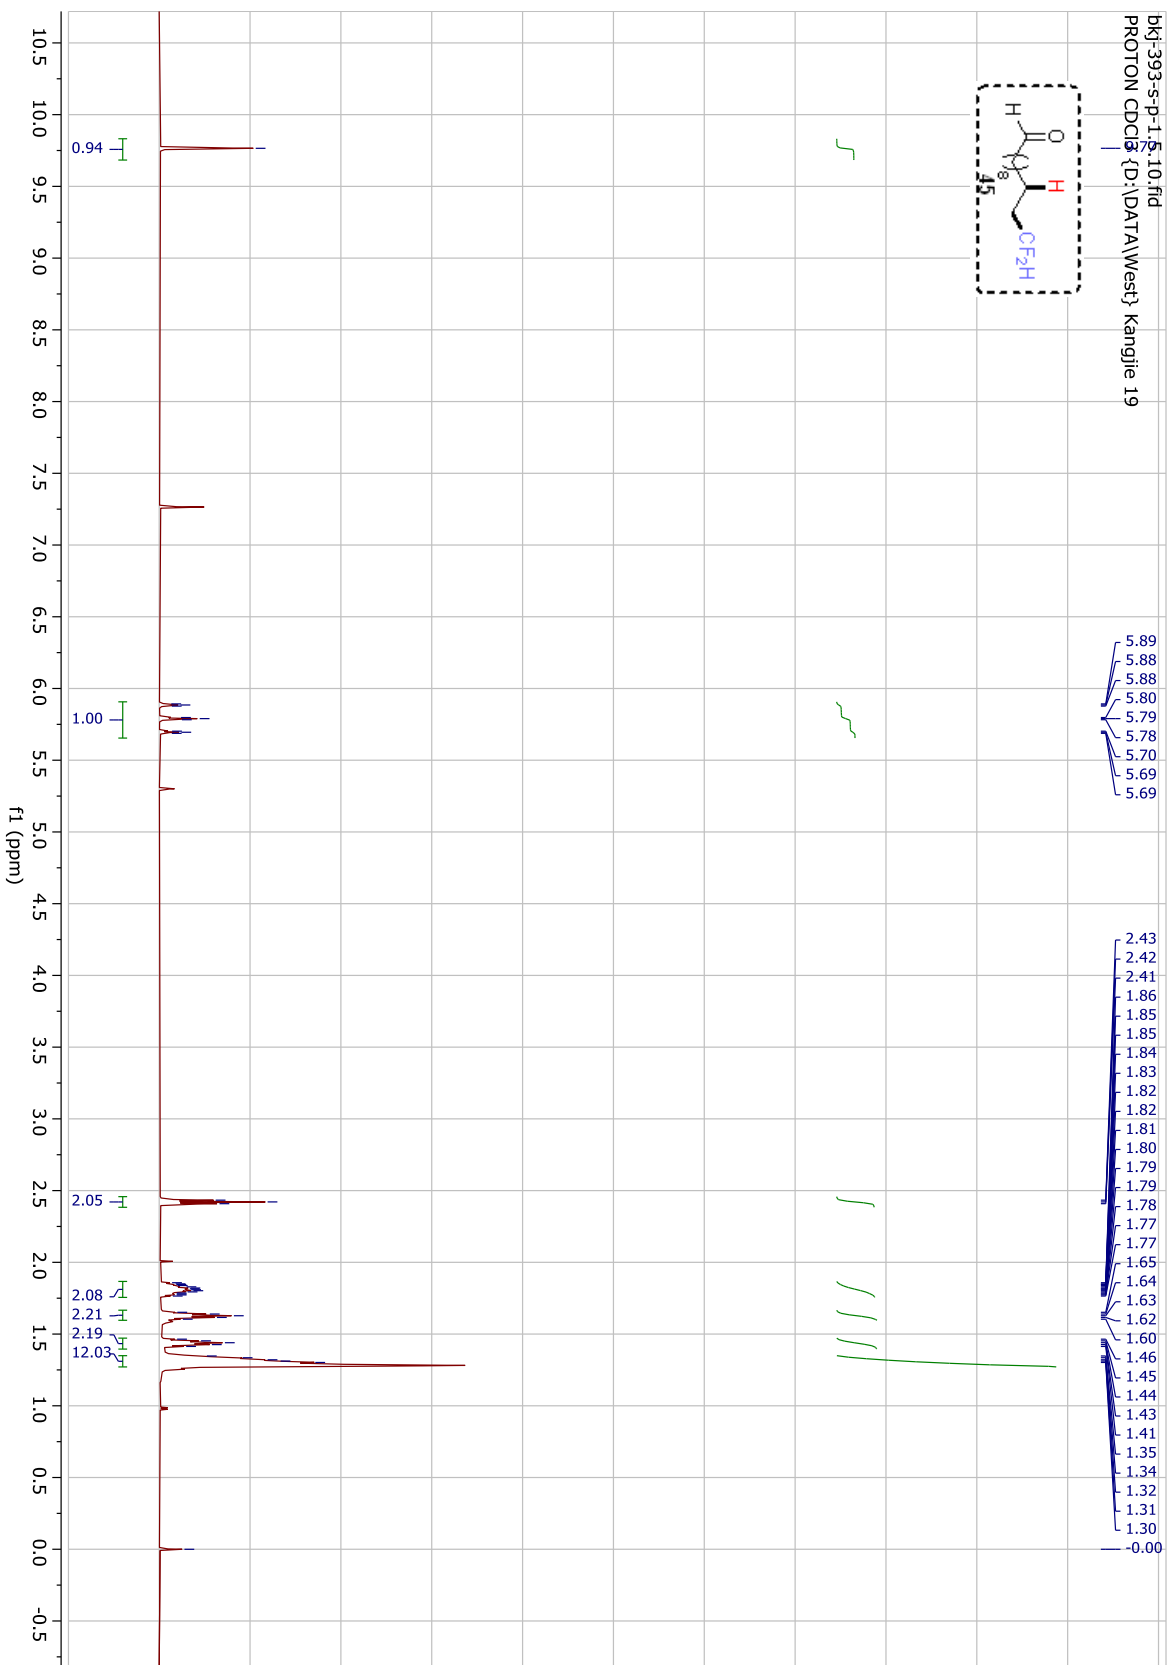



bkf-393-s-p815-11.fid  
C13CPD Q823 (D:\DATAWest\ Kangjie 19

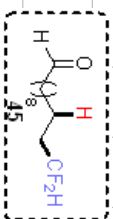

119.08  
117.50  
115.91

43.92  
34.22  
34.08  
33.95  
29.33  
29.32  
29.14  
29.03  
22.13  
22.10  
22.07

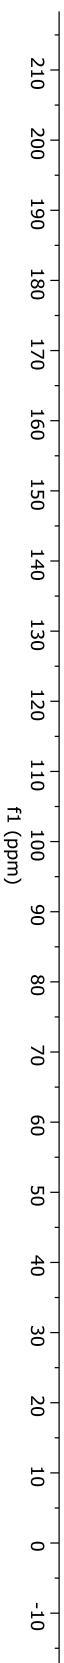

bkj-393-s-p-1.5.12.ftd  
F19\_baseline\_correct 1D  
F19\_baseline\_correct CDCl3 {D:\DATA\West} Kangjie 19

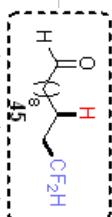

-115.67  
-115.70  
-115.73  
-115.77  
-115.80  
-115.83



bk1-386-t-p-h-1.6.10.fid  
PROTON CDCl3 {D:\DATA\West\ Kangjie 20

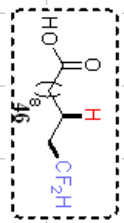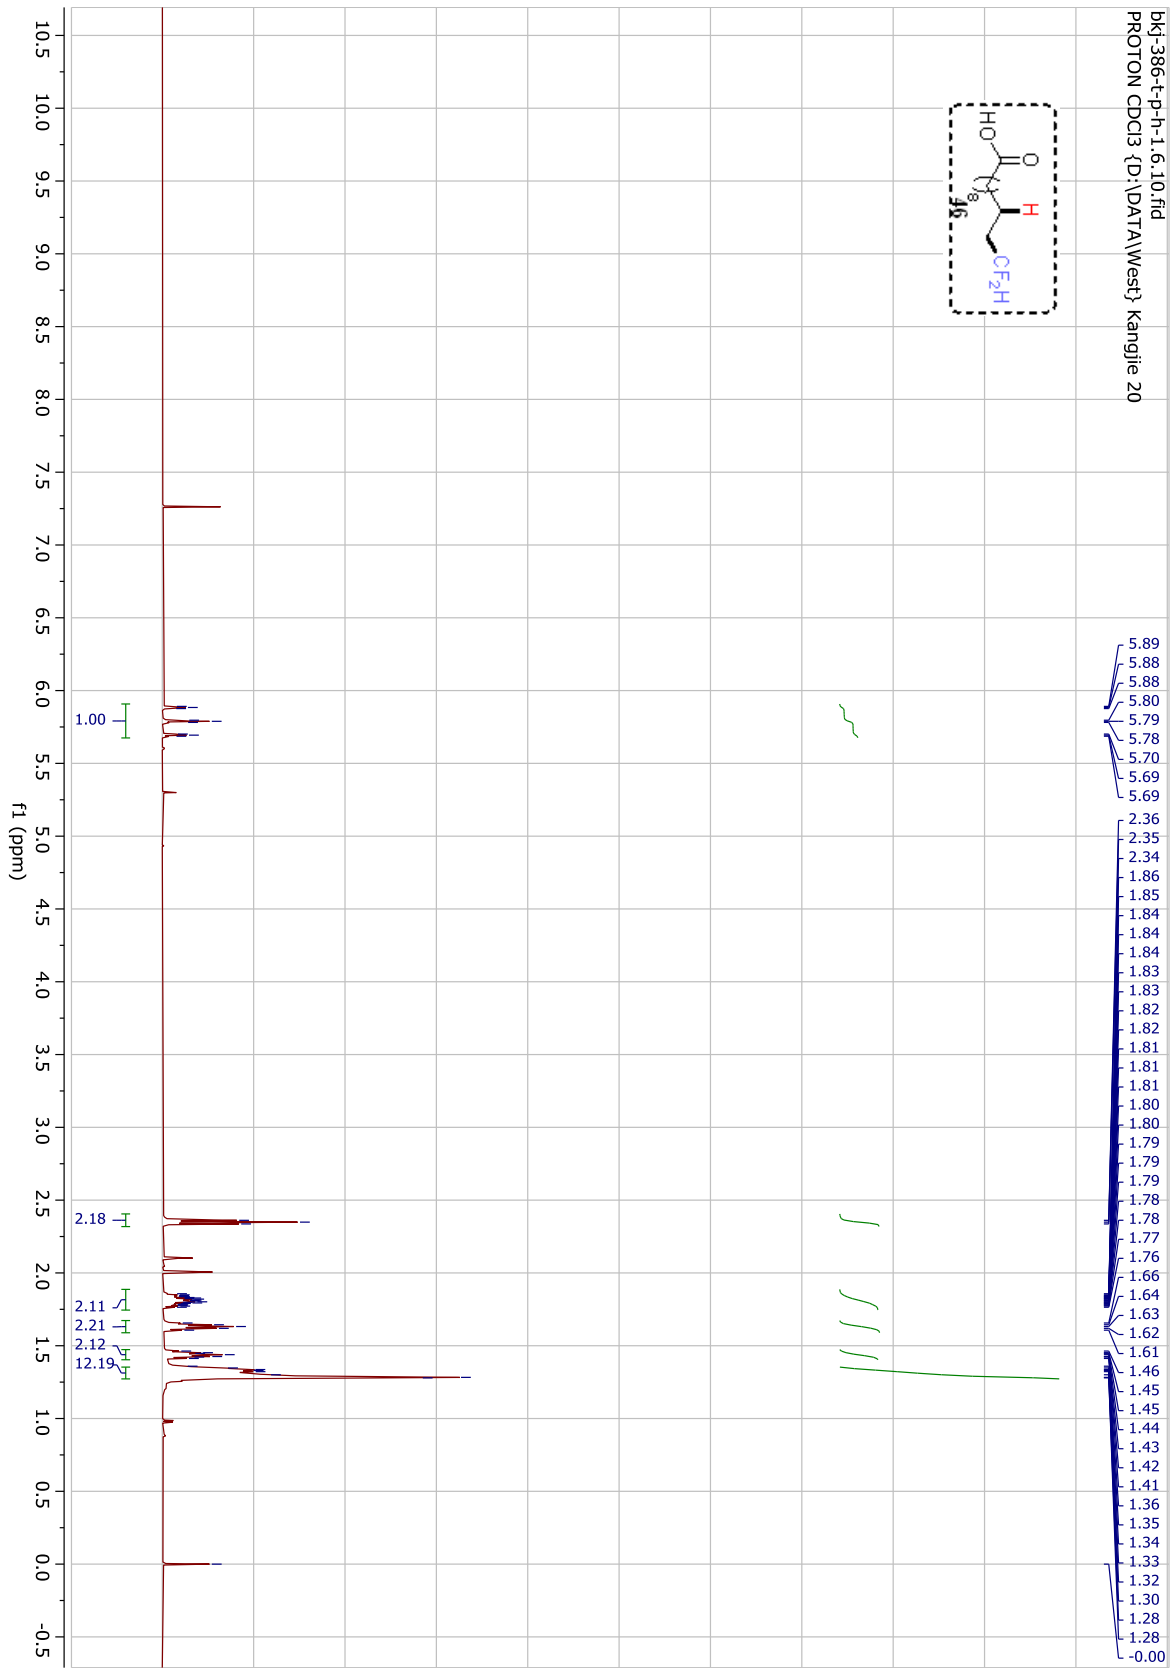

bkt-393-t-p-1-5-11.fid  
C13CPD CDCl3 (D:\DATA\W...  
Kangjie 20

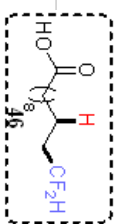

119.08  
117.50  
115.92

34.22  
34.08  
34.03  
33.95  
29.32  
29.18  
29.03  
24.65  
22.14  
22.10  
22.07

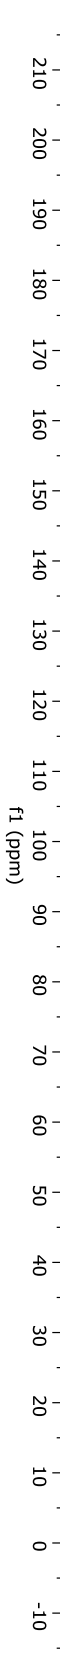

bkj-393-t-p-1.5.12.ftd  
F19\_baseline\_correct ID  
F19\_baseline\_correct CDC13 {D:\DATA\West} Kangjie 20

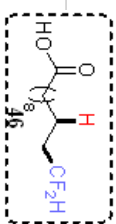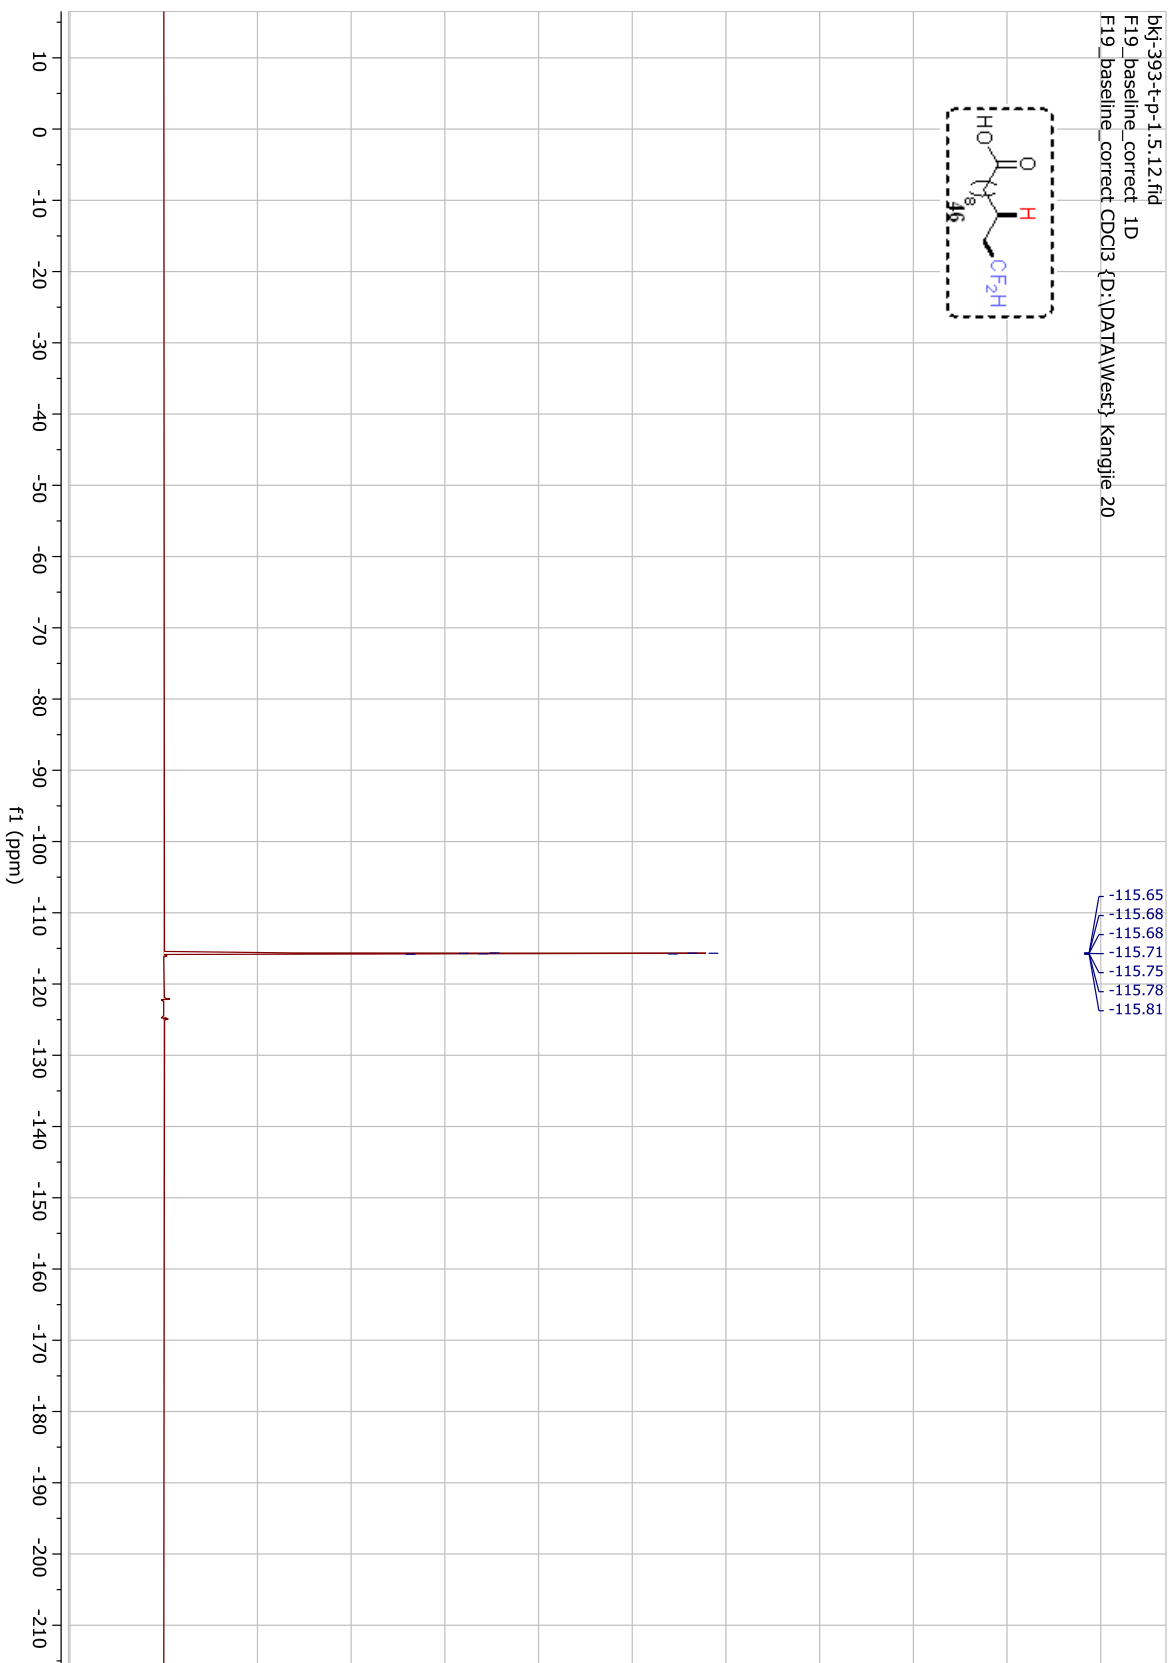

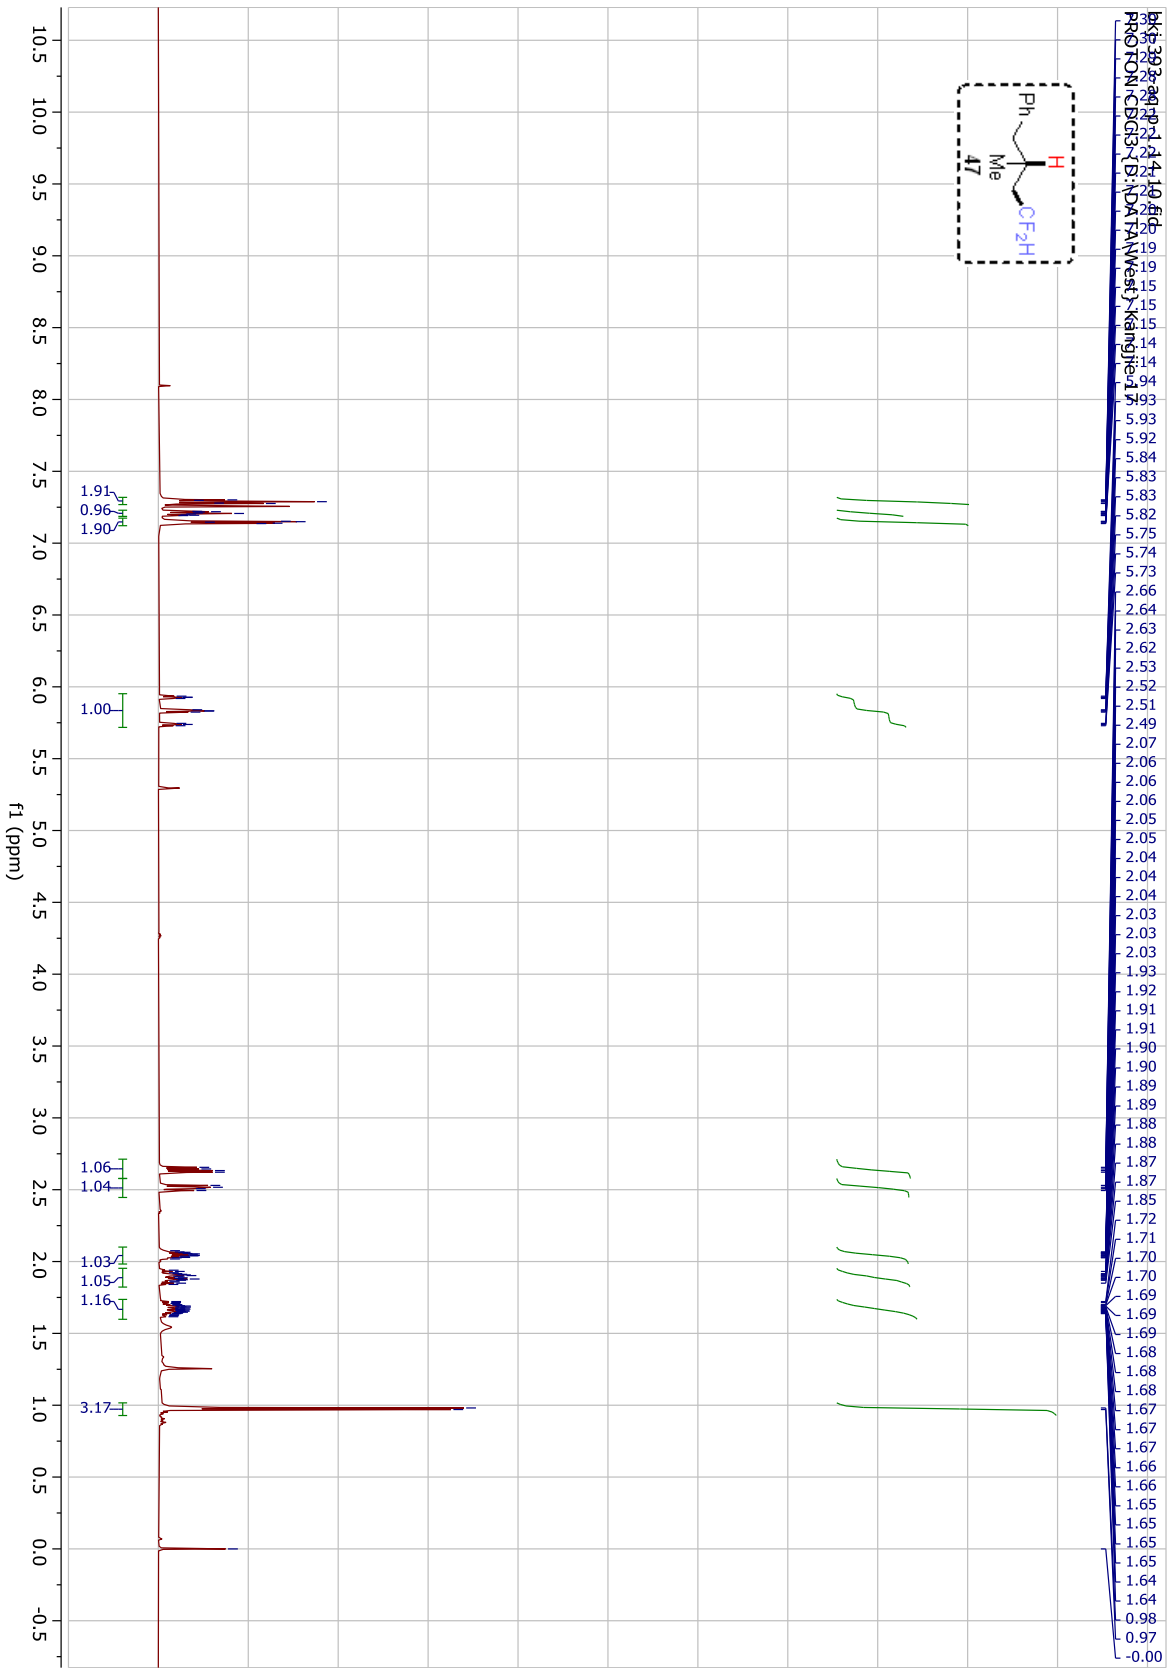

bkj-393-aq-p-1.14.12.fid  
C13CPD CDCl3 (D:\DATA\Westj kangjie 17

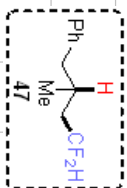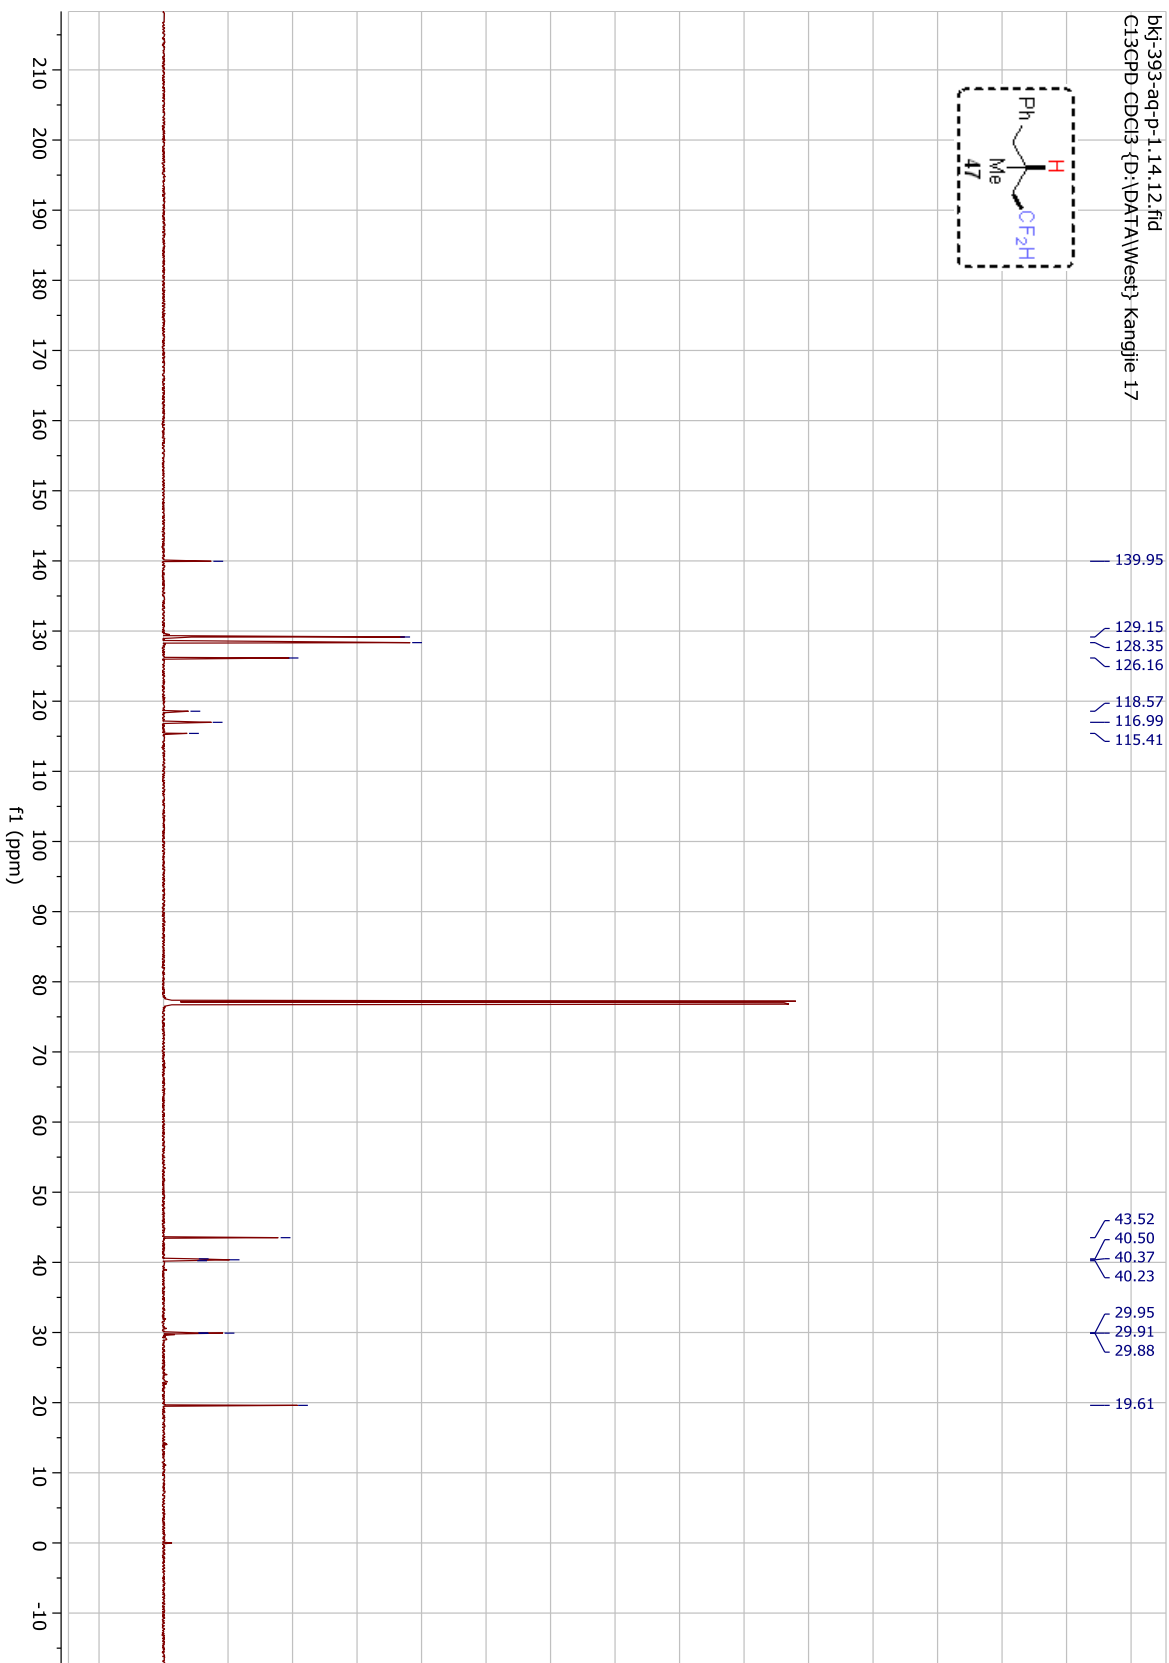

bkj-393-aq-p-1.14.11.fid  
F19\_baseline\_correct ID  
F19\_baseline\_correct CDC13 {D:\DATA\West}\Kangjie 17

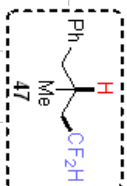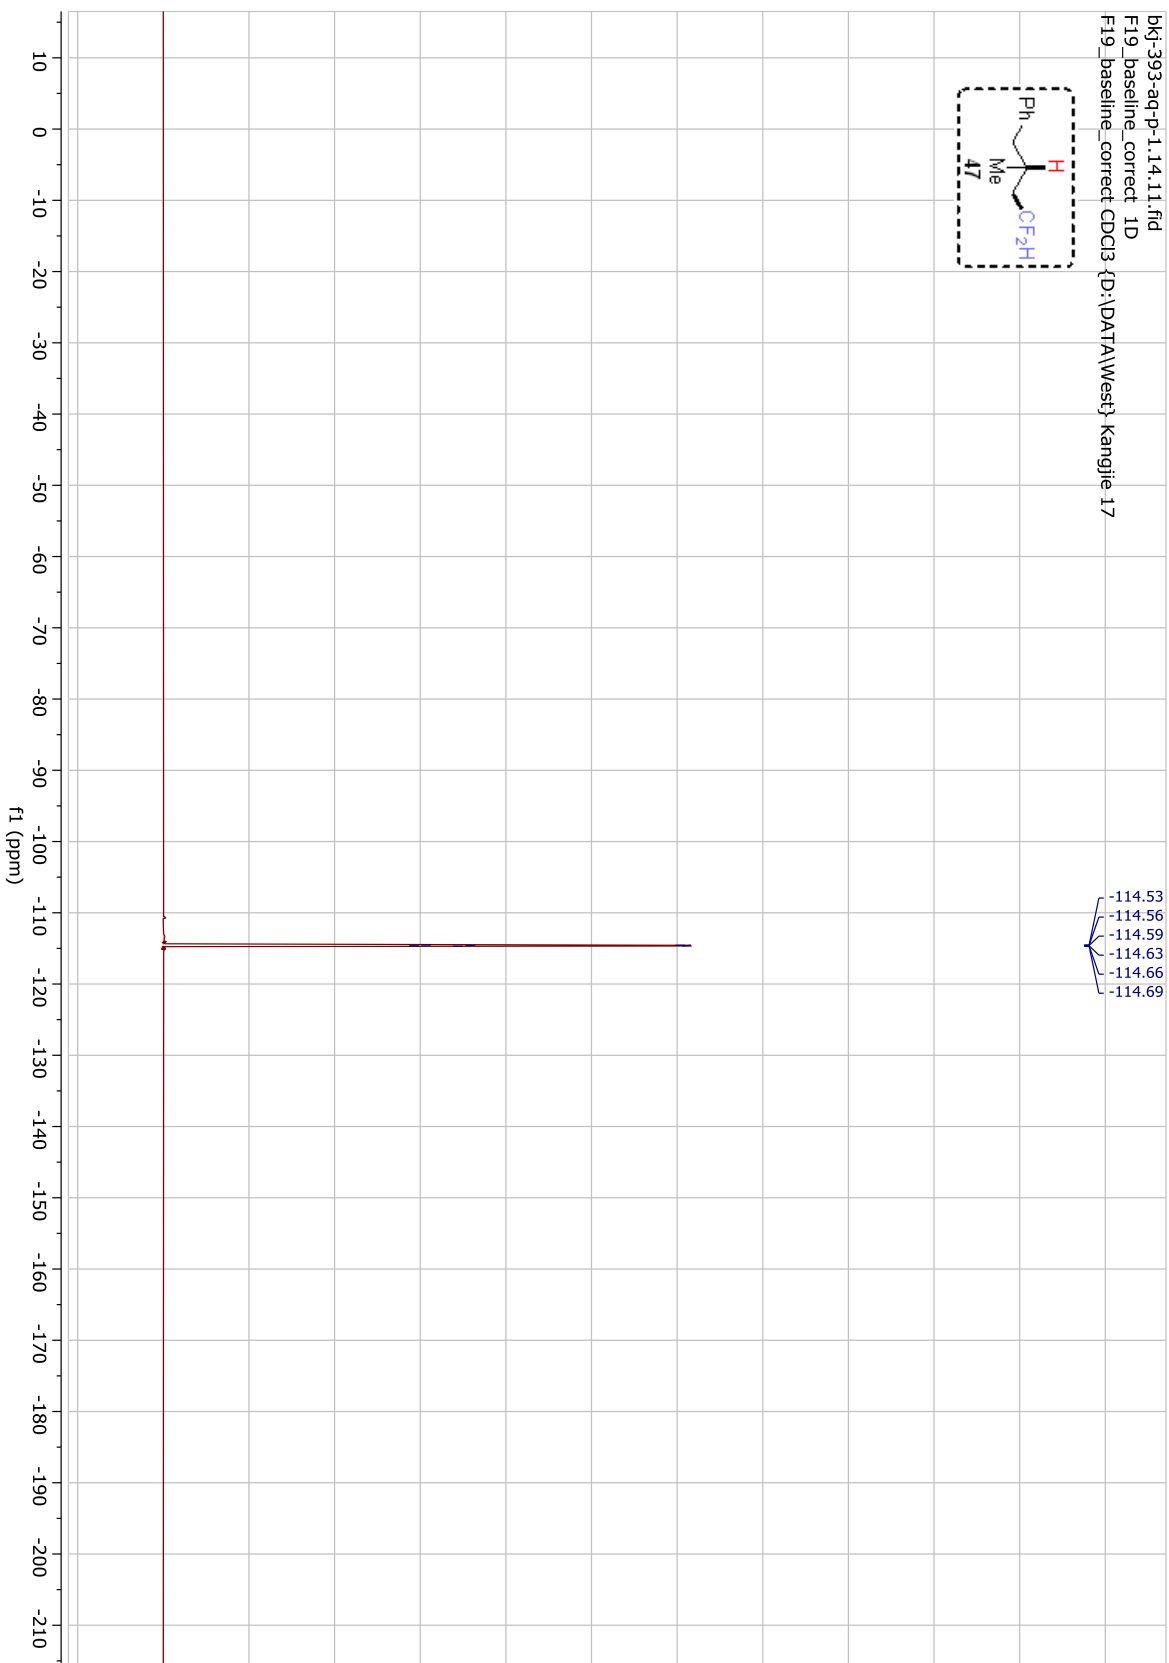



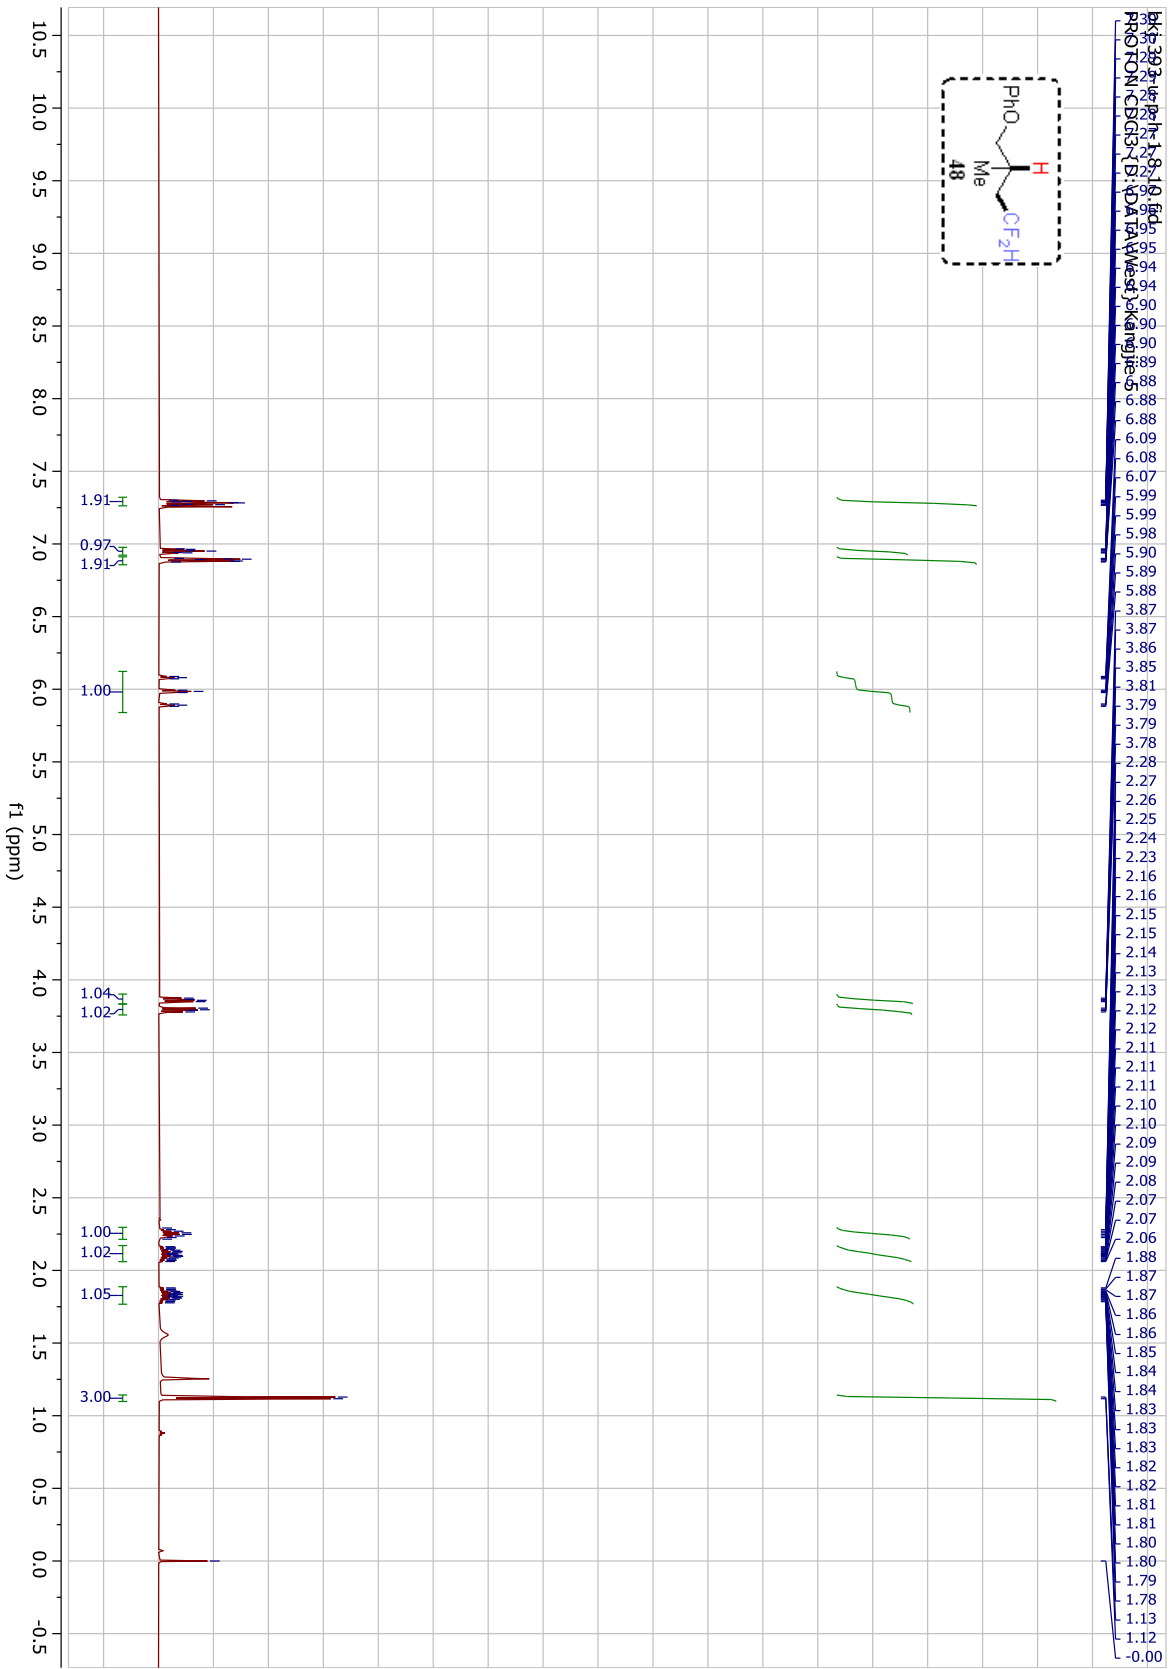

bkt-393-u-p-17.11.fid  
C13CPD CDCl3 (D:\DATAWest\ Kangjie 11

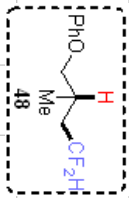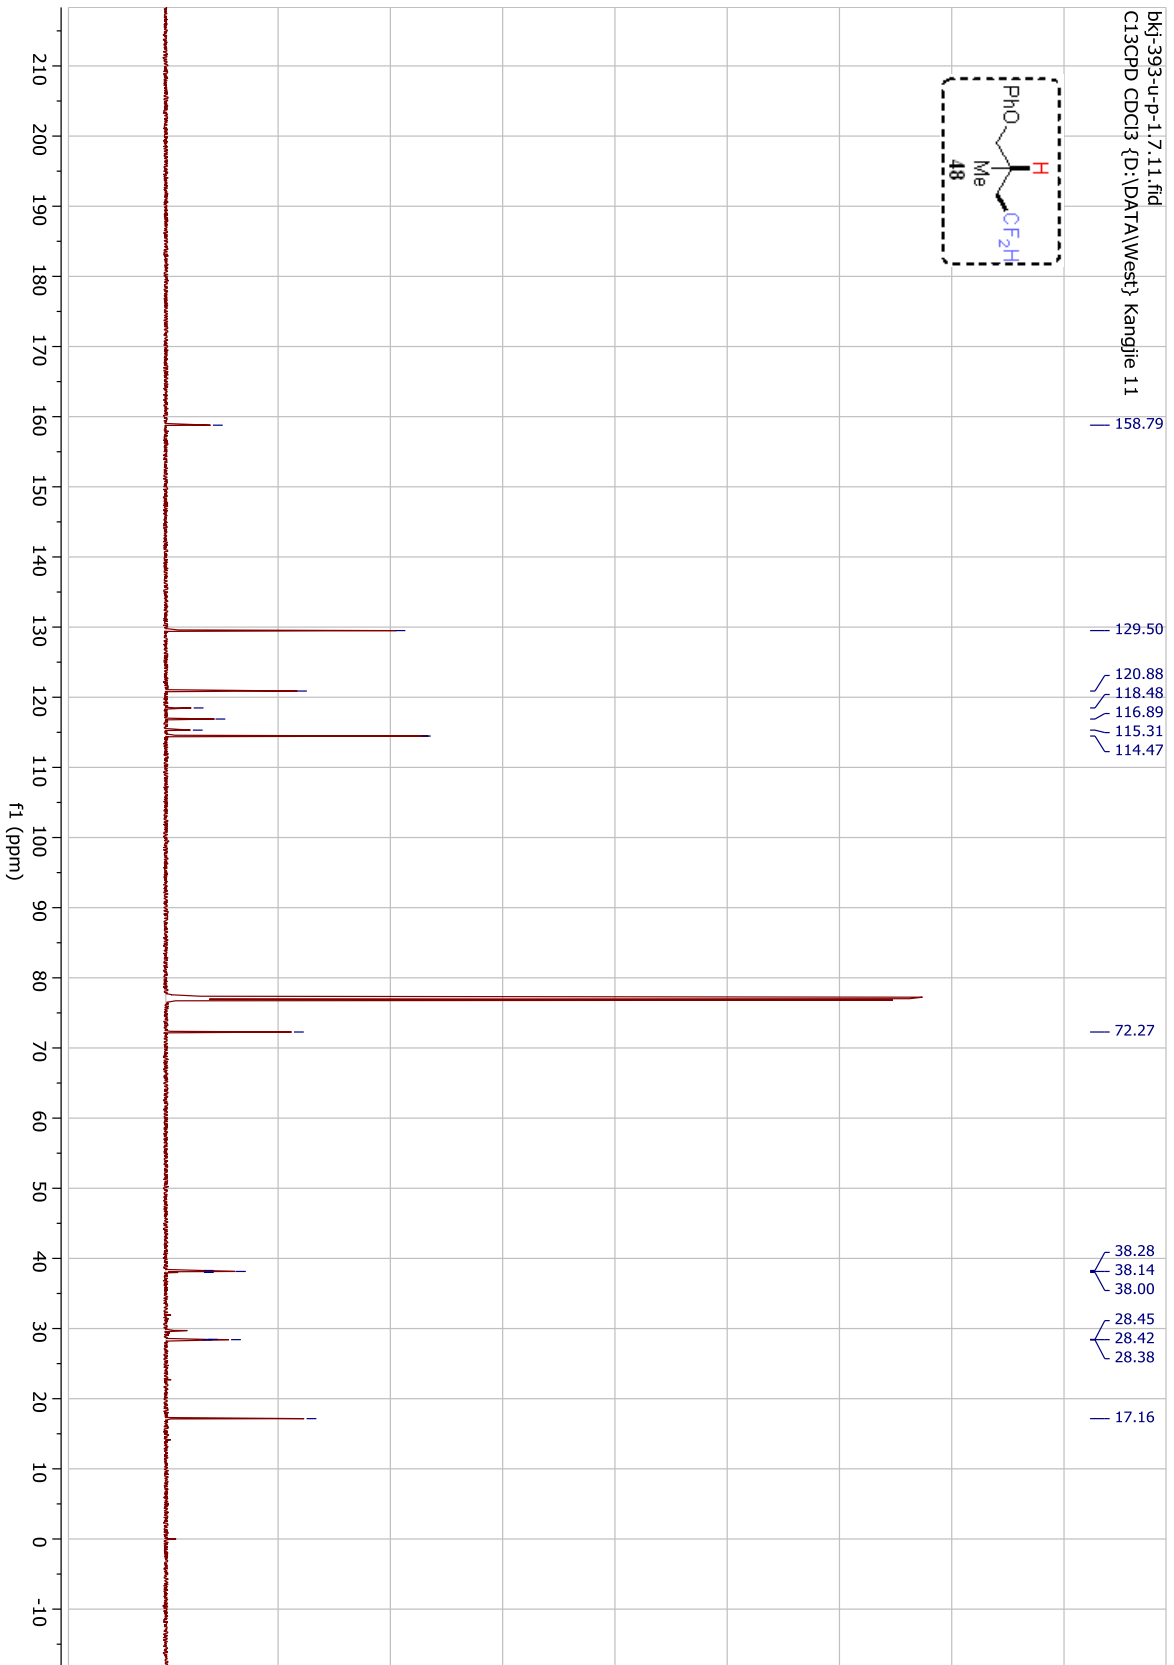

bkt-393-u-p-1.7.12.fid  
F19\_baseline\_correct 1D  
F19\_baseline\_correct CDCl3 {D:\DATA\West\ Kangjie 11

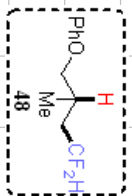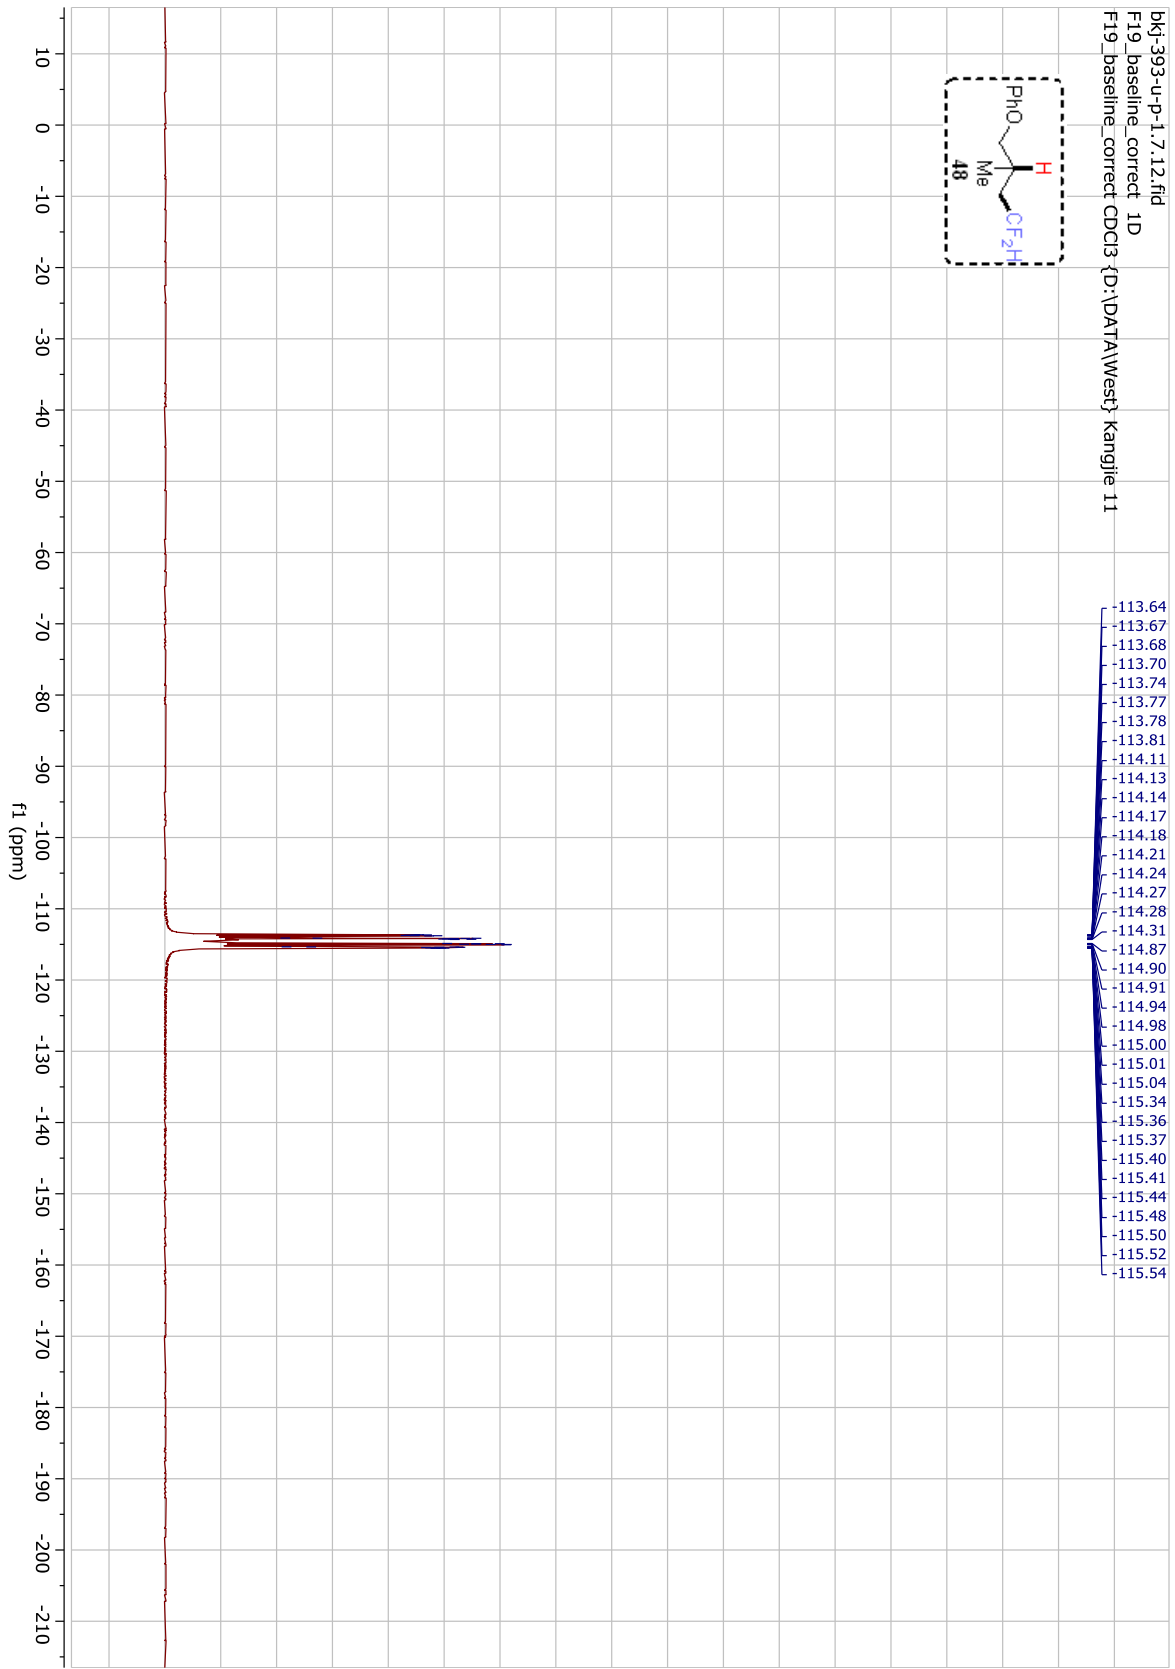

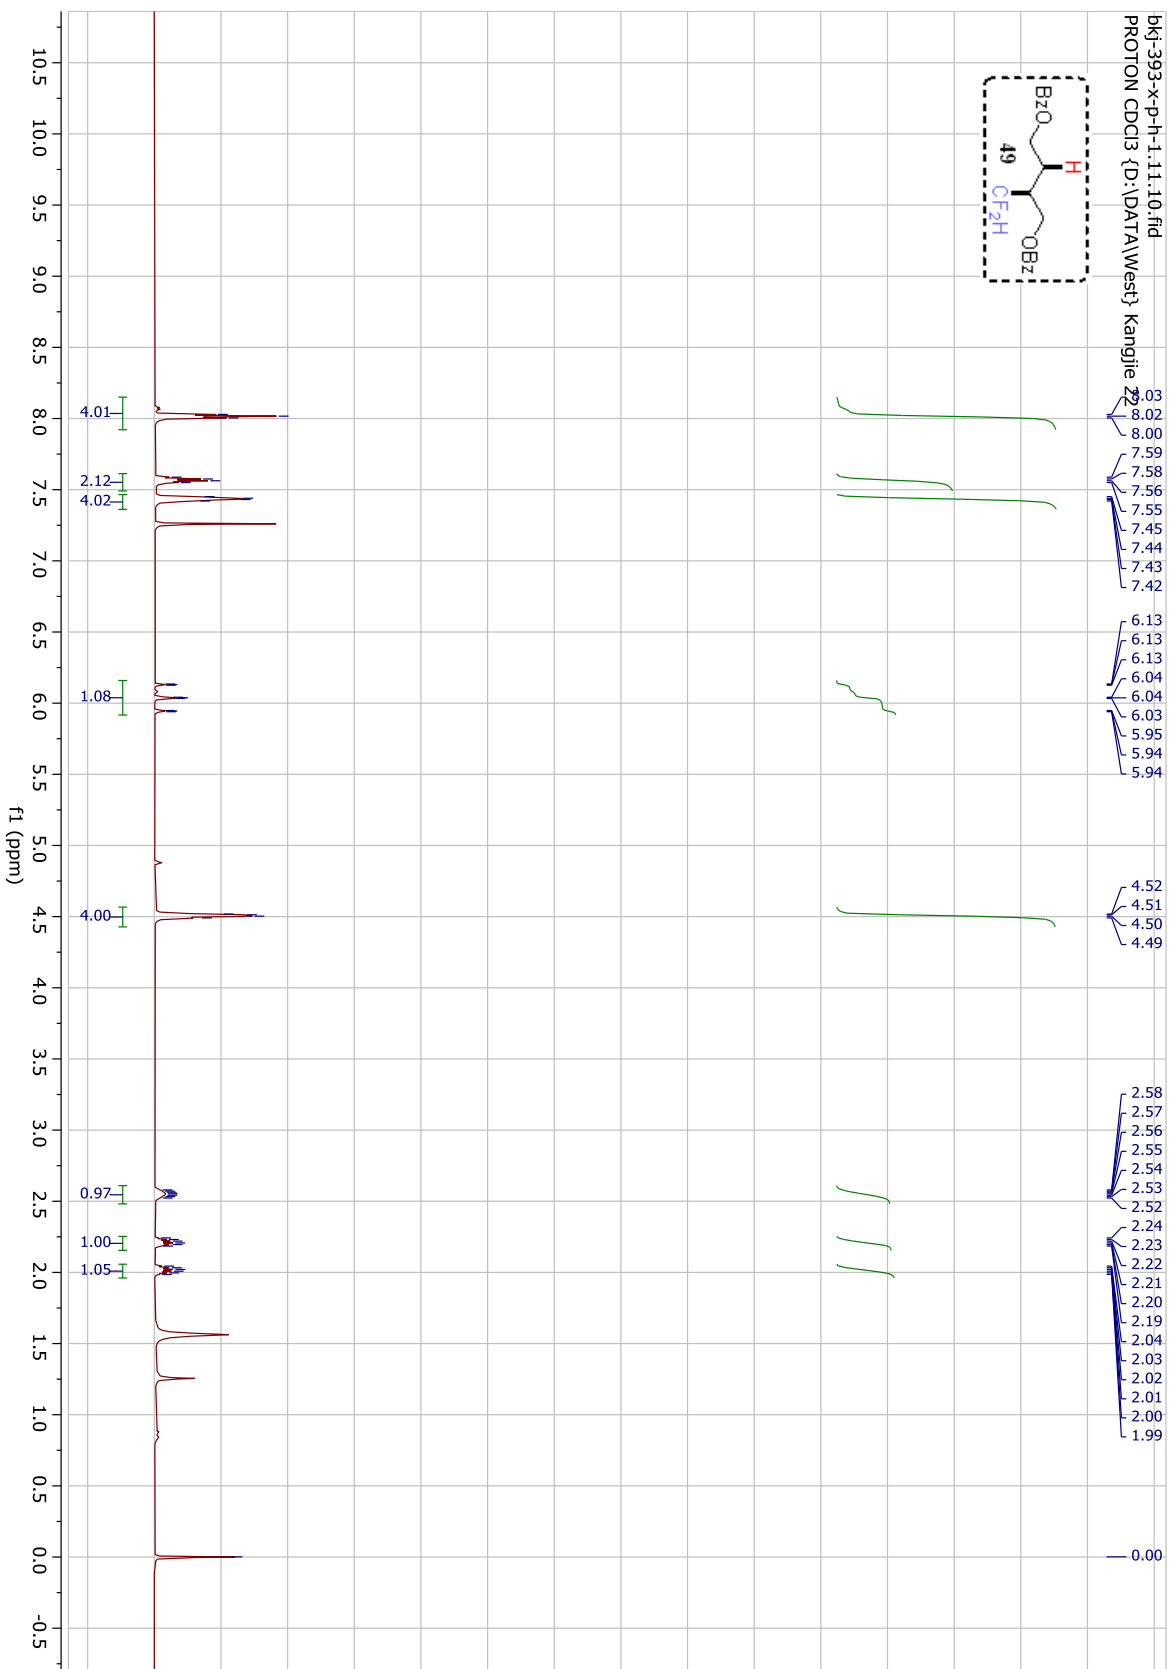

bkj-393-x-p-1-8-11.fid  
C13CPD CDCl3 (D:\DATA\Westj Kangjil)

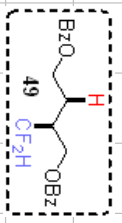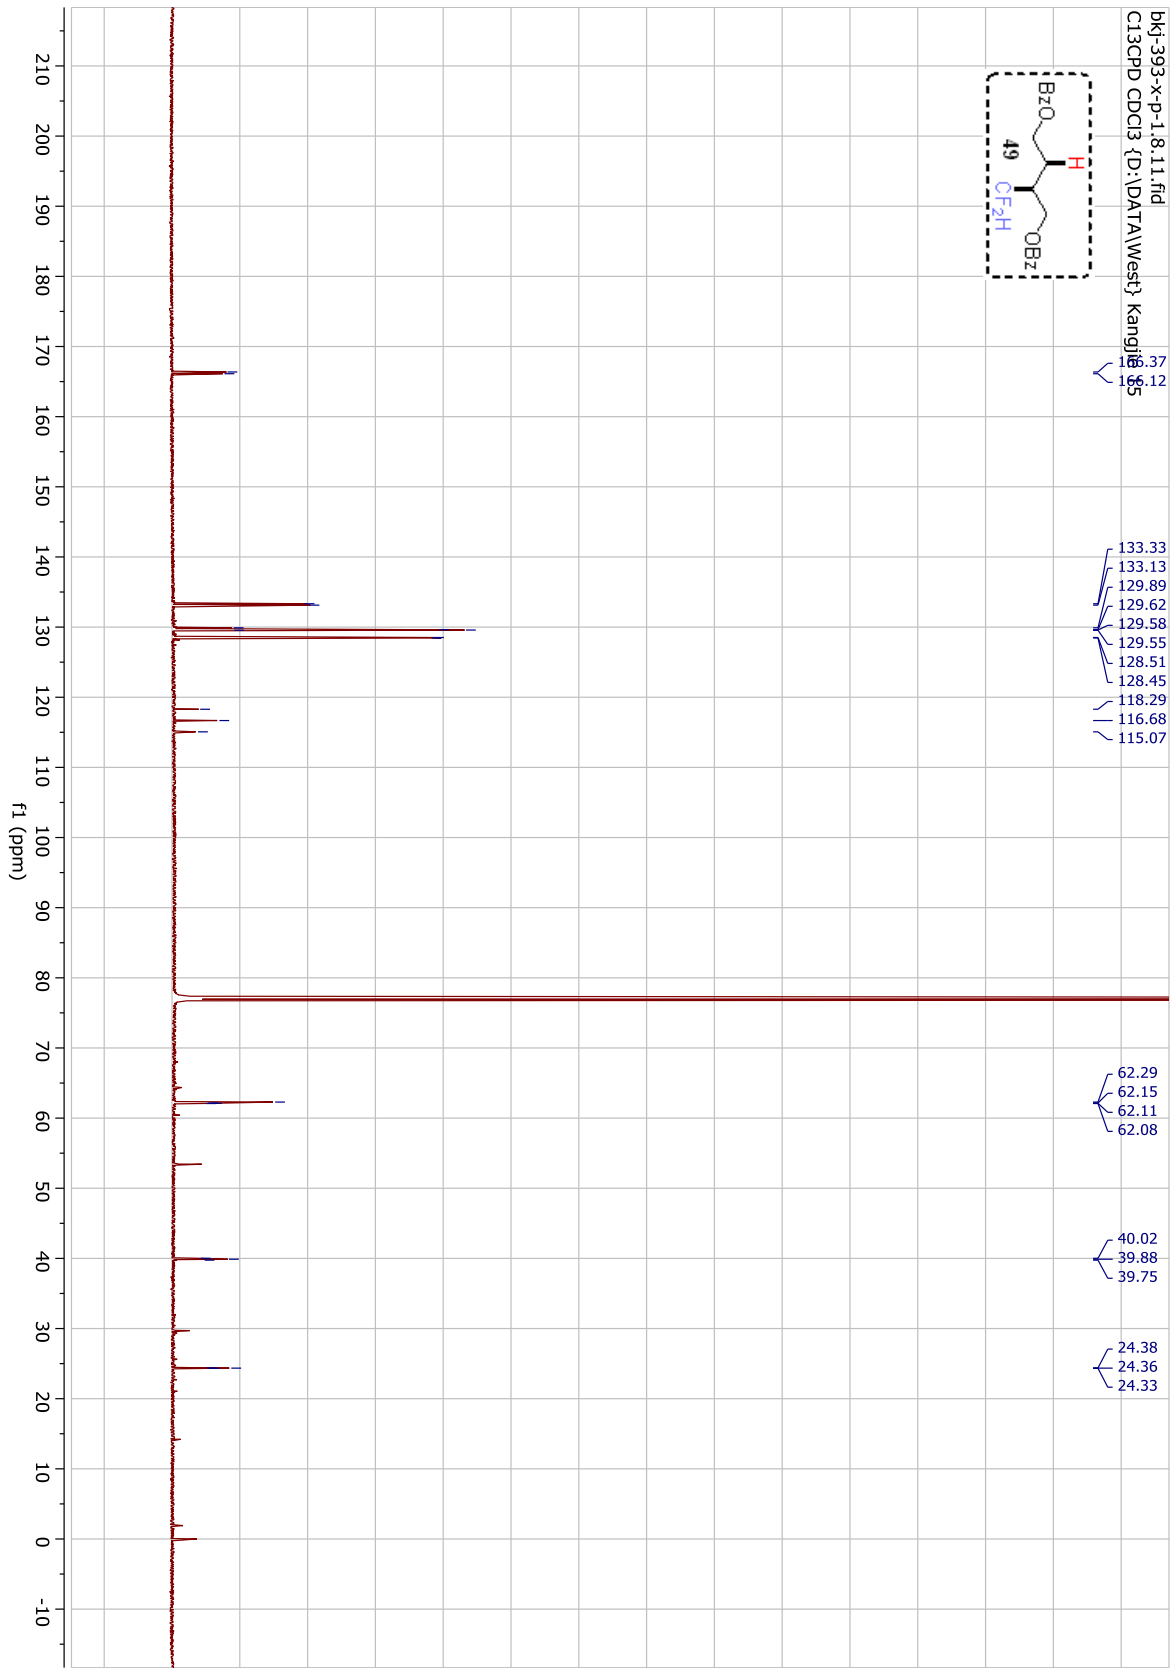

bkj-393-x-p-1.8.12.fid  
F19\_baseline\_correct 1D  
F19\_baseline\_correct CDCl3 {D:\DATA\West\ Kangjie 15

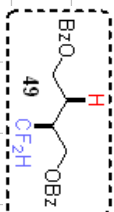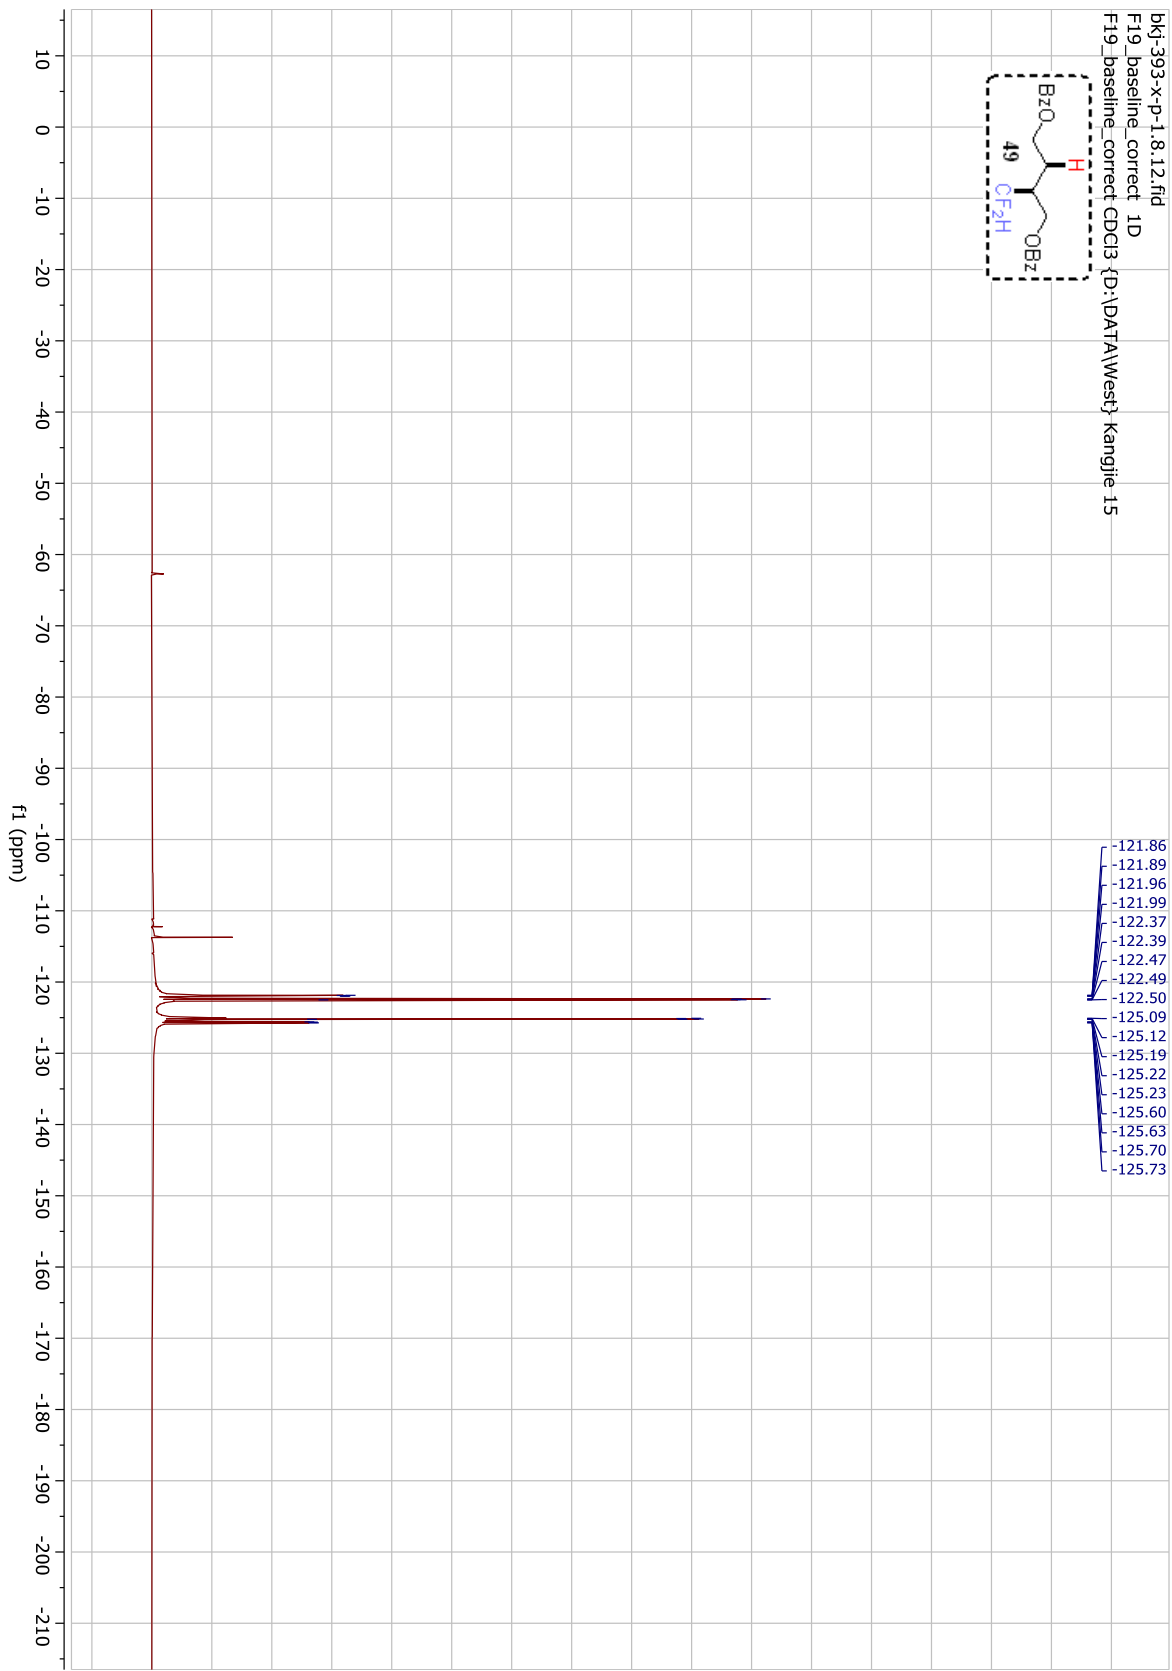

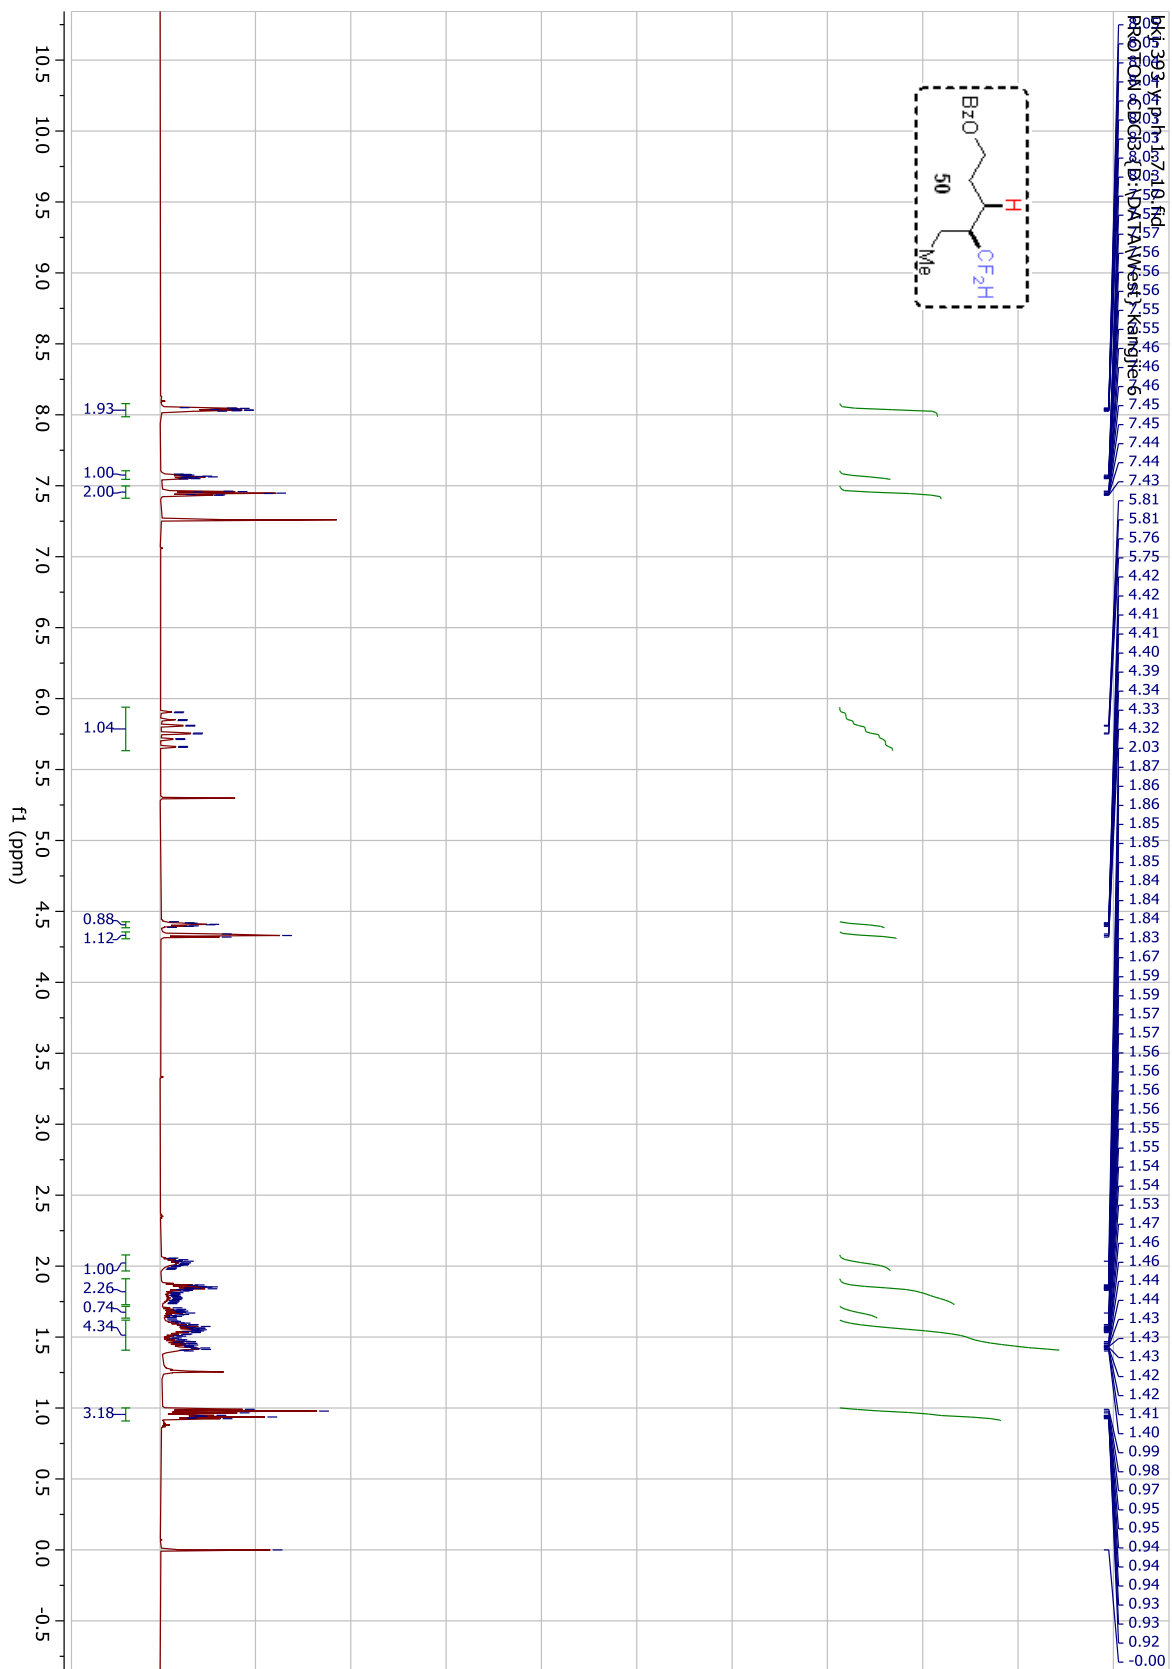

bjl-393-y-p-c-1,8,11.fid  
C13CPD CDCl3 (D:\DATA\Westj\_Kangjil)

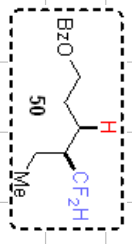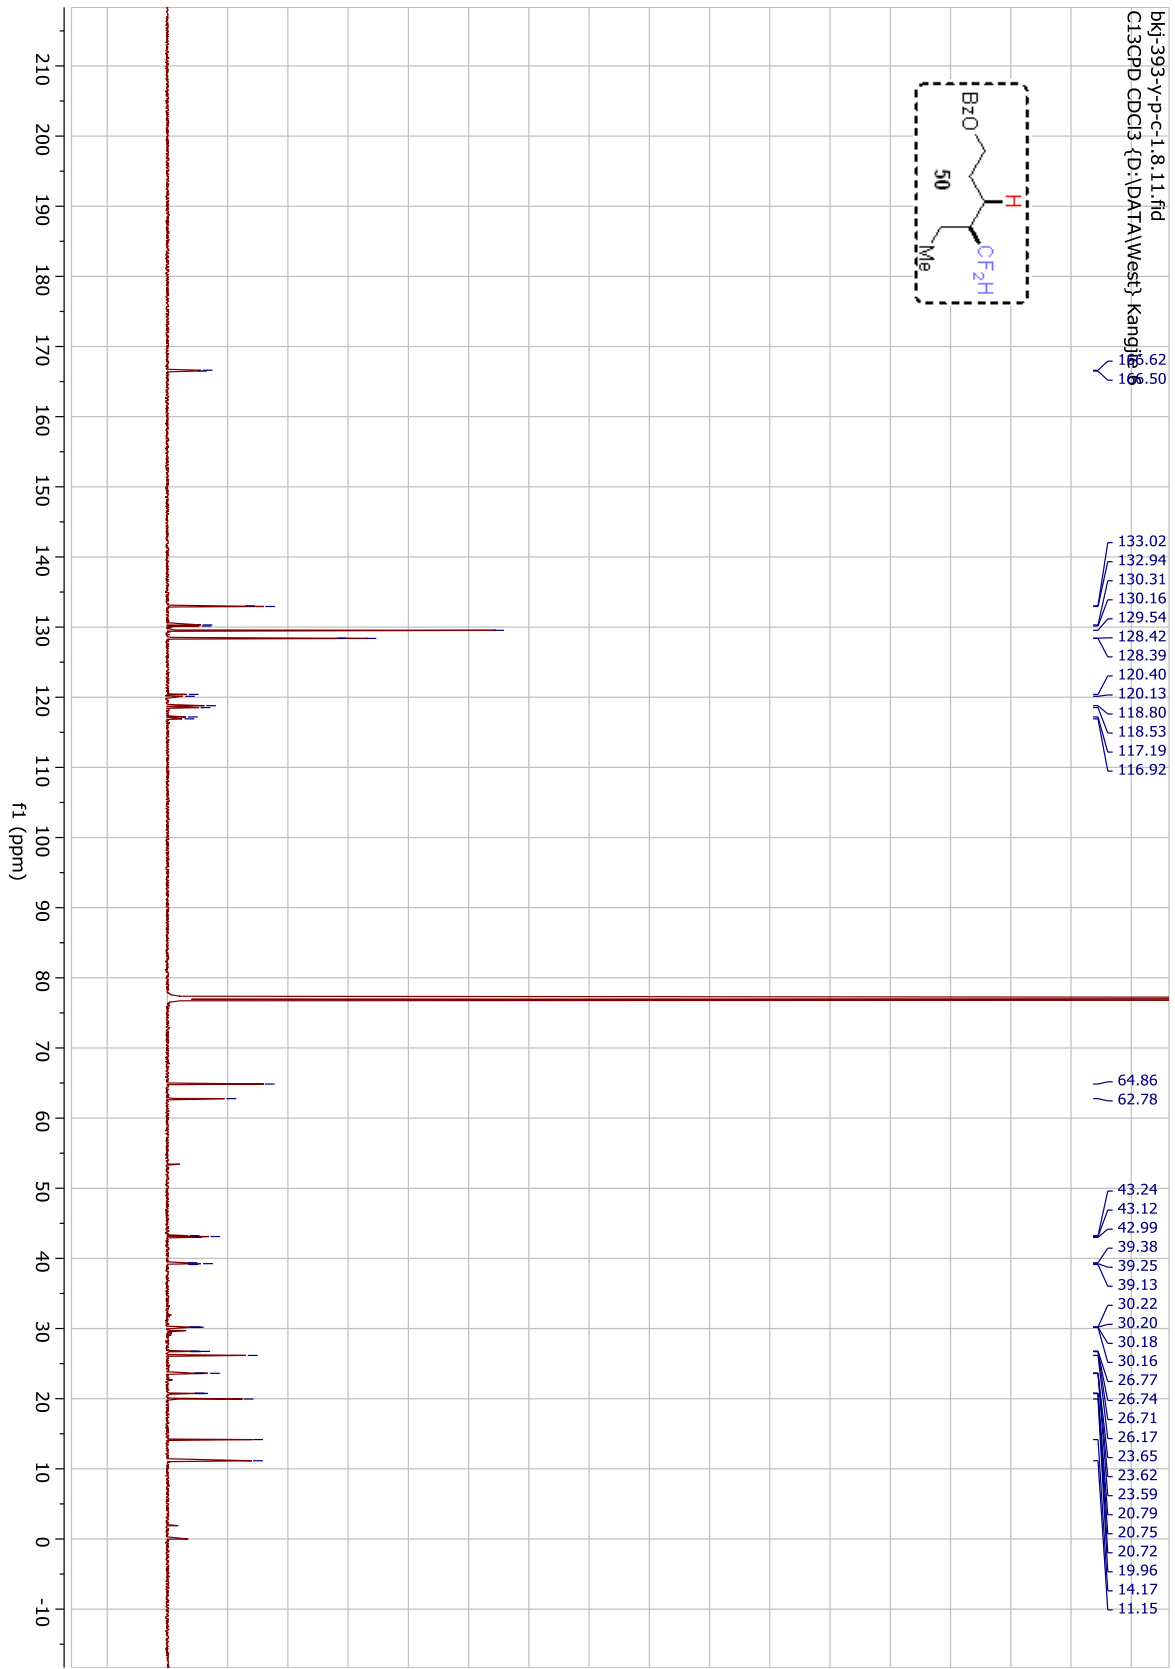



bkj-393-y-p-h-1-7.11.fid  
F19\_baseline\_correct\_1D  
F19\_baseline\_correct\_CDCl3 {D:\DATA\West} Kangjie 6

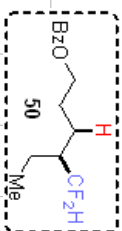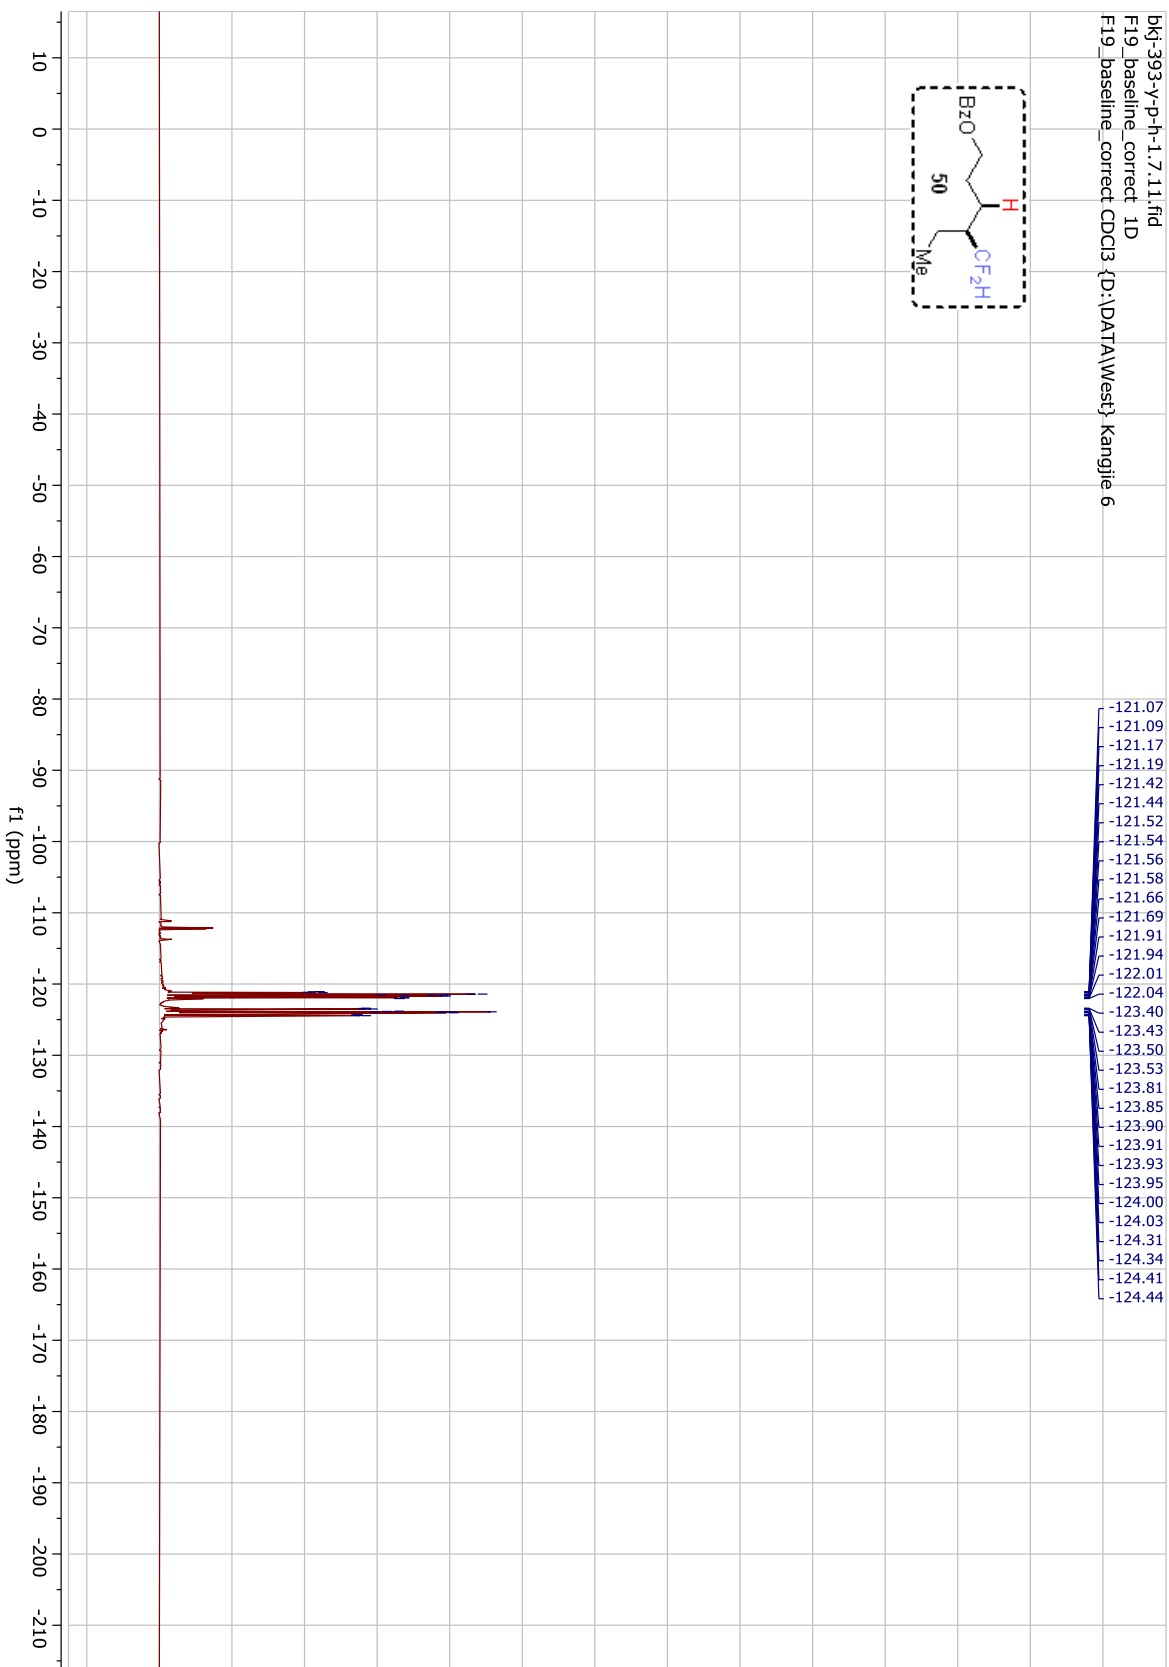

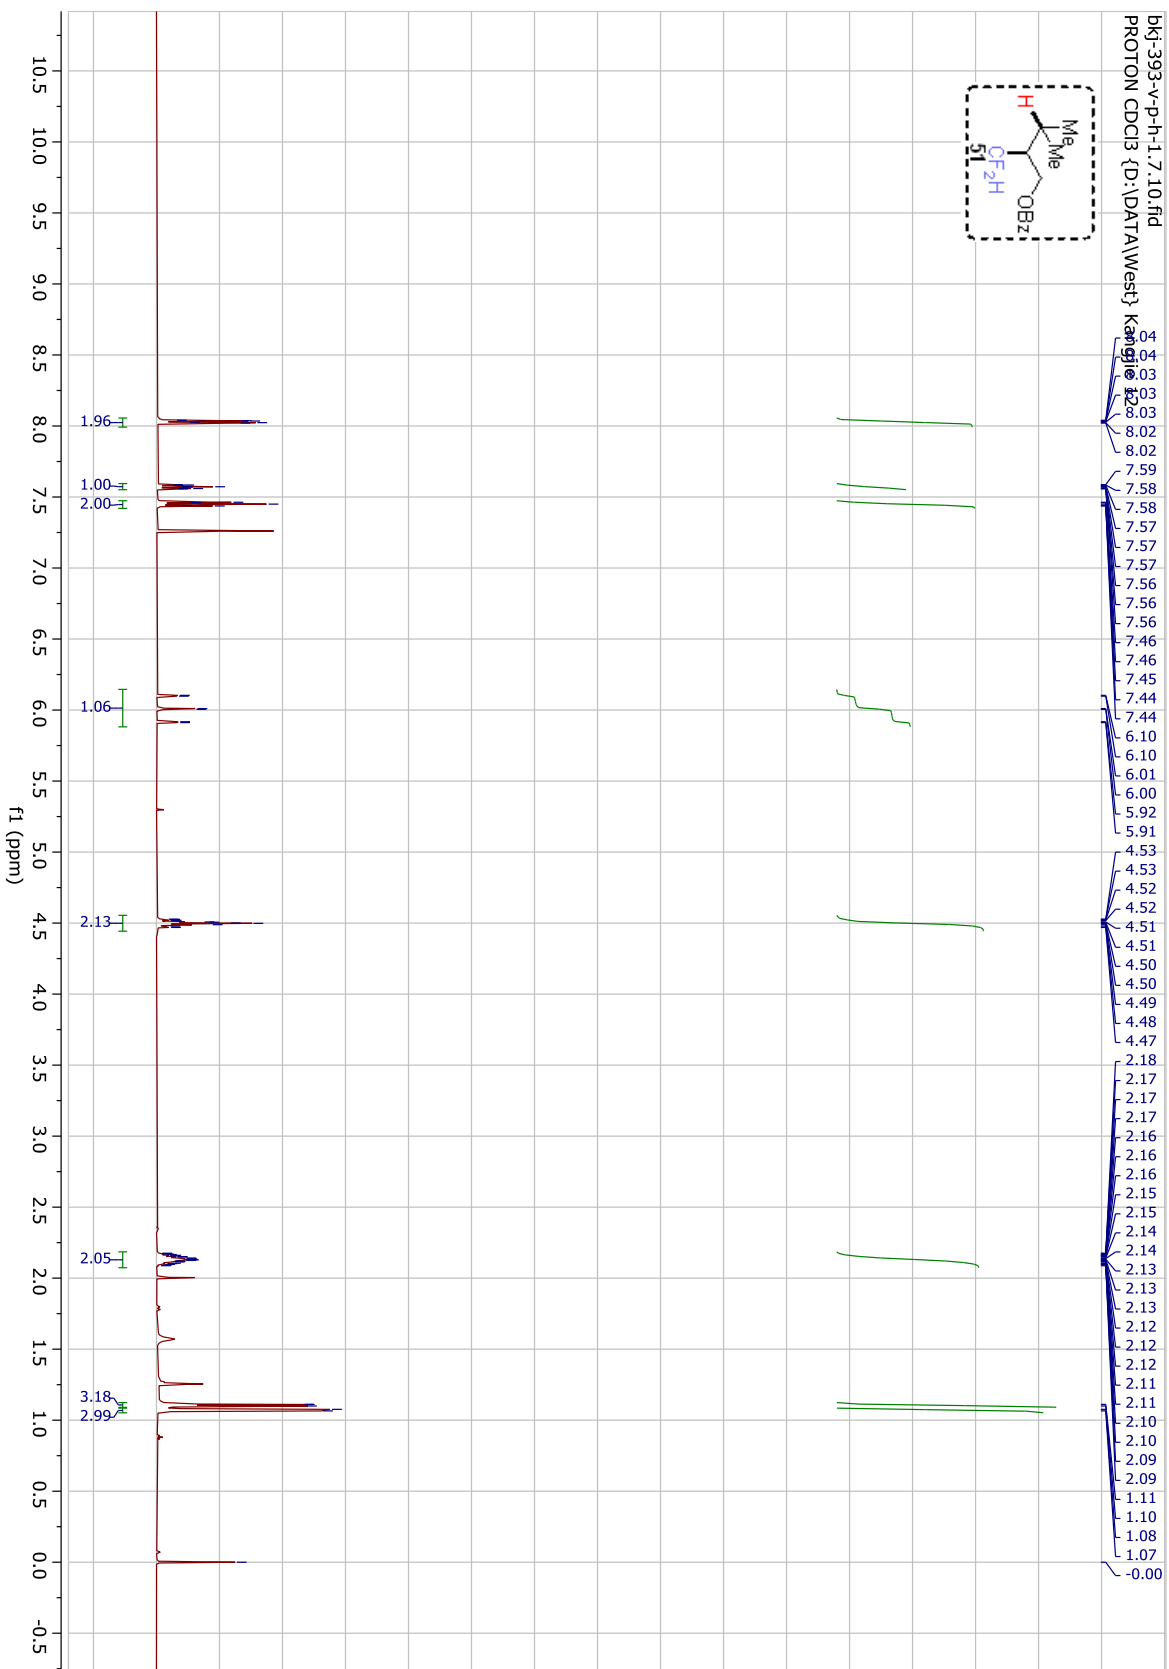

bkt-393-v-p-c-1.7.11.fid  
C13CPD CDCl3 (D:\DATA\Westj Kangjil) 812

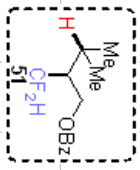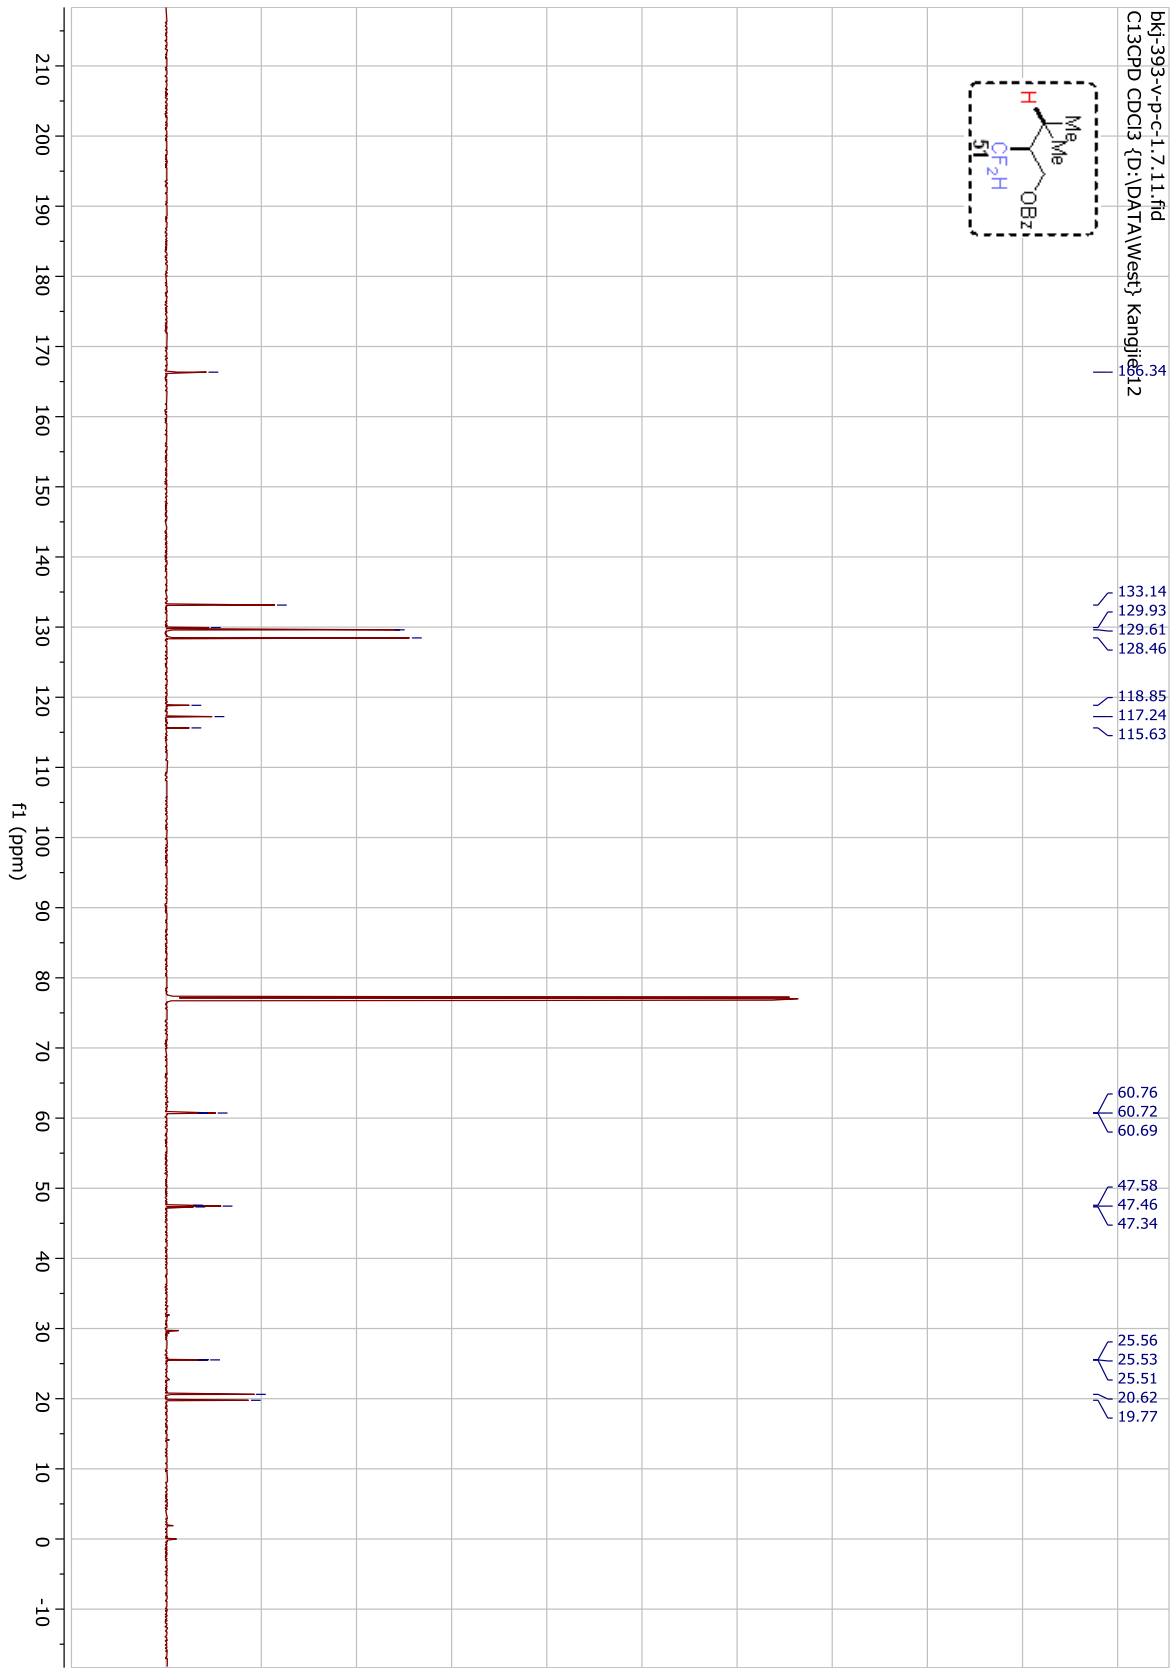

bkj-393-v-p-h-1.7.11.fid  
F19\_baseline\_correct ID  
F19\_baseline\_correct CDC13 {D:\DATA\West} Kangjie 12

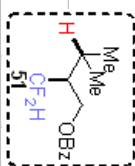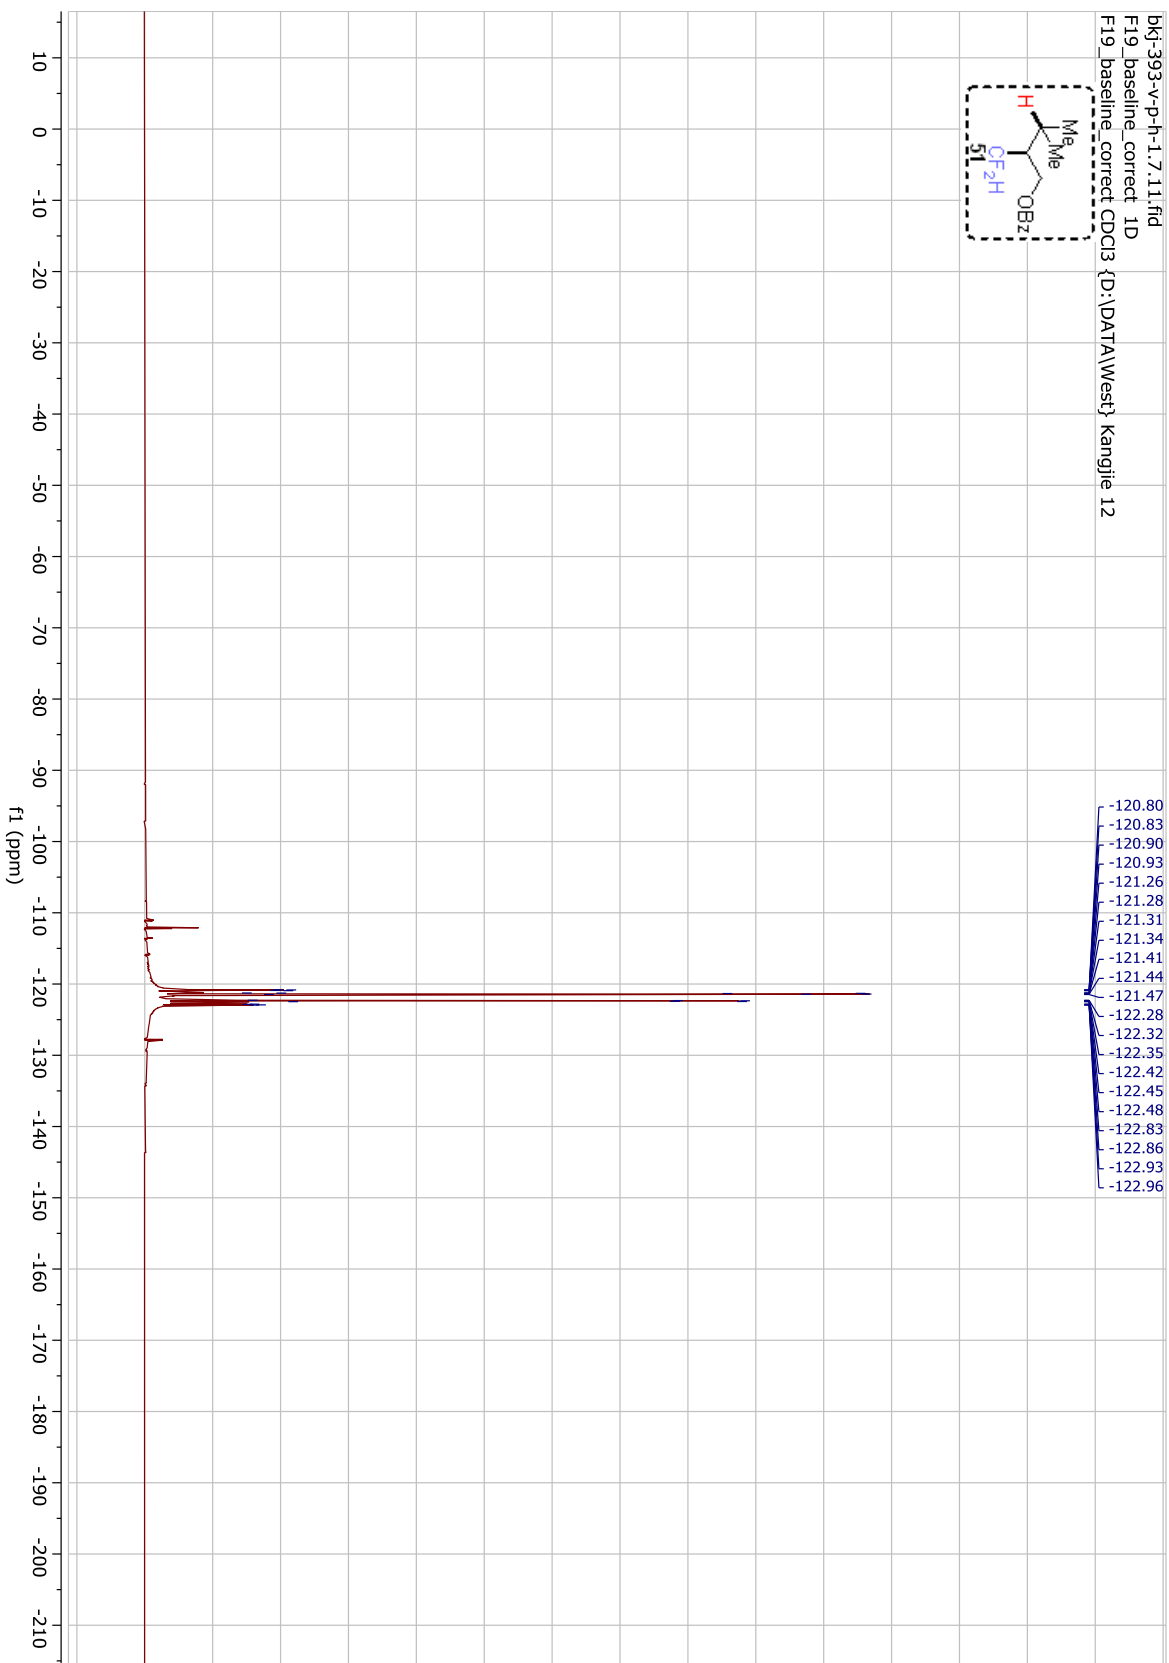





bjt-393-ag-p-h-1.9.11.fid  
F19\_baseline\_correct\_1D  
F19\_baseline\_correct\_1DCl3 {D:\DATA\West}\Kangjie 20

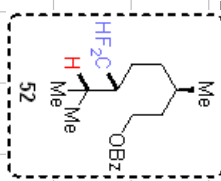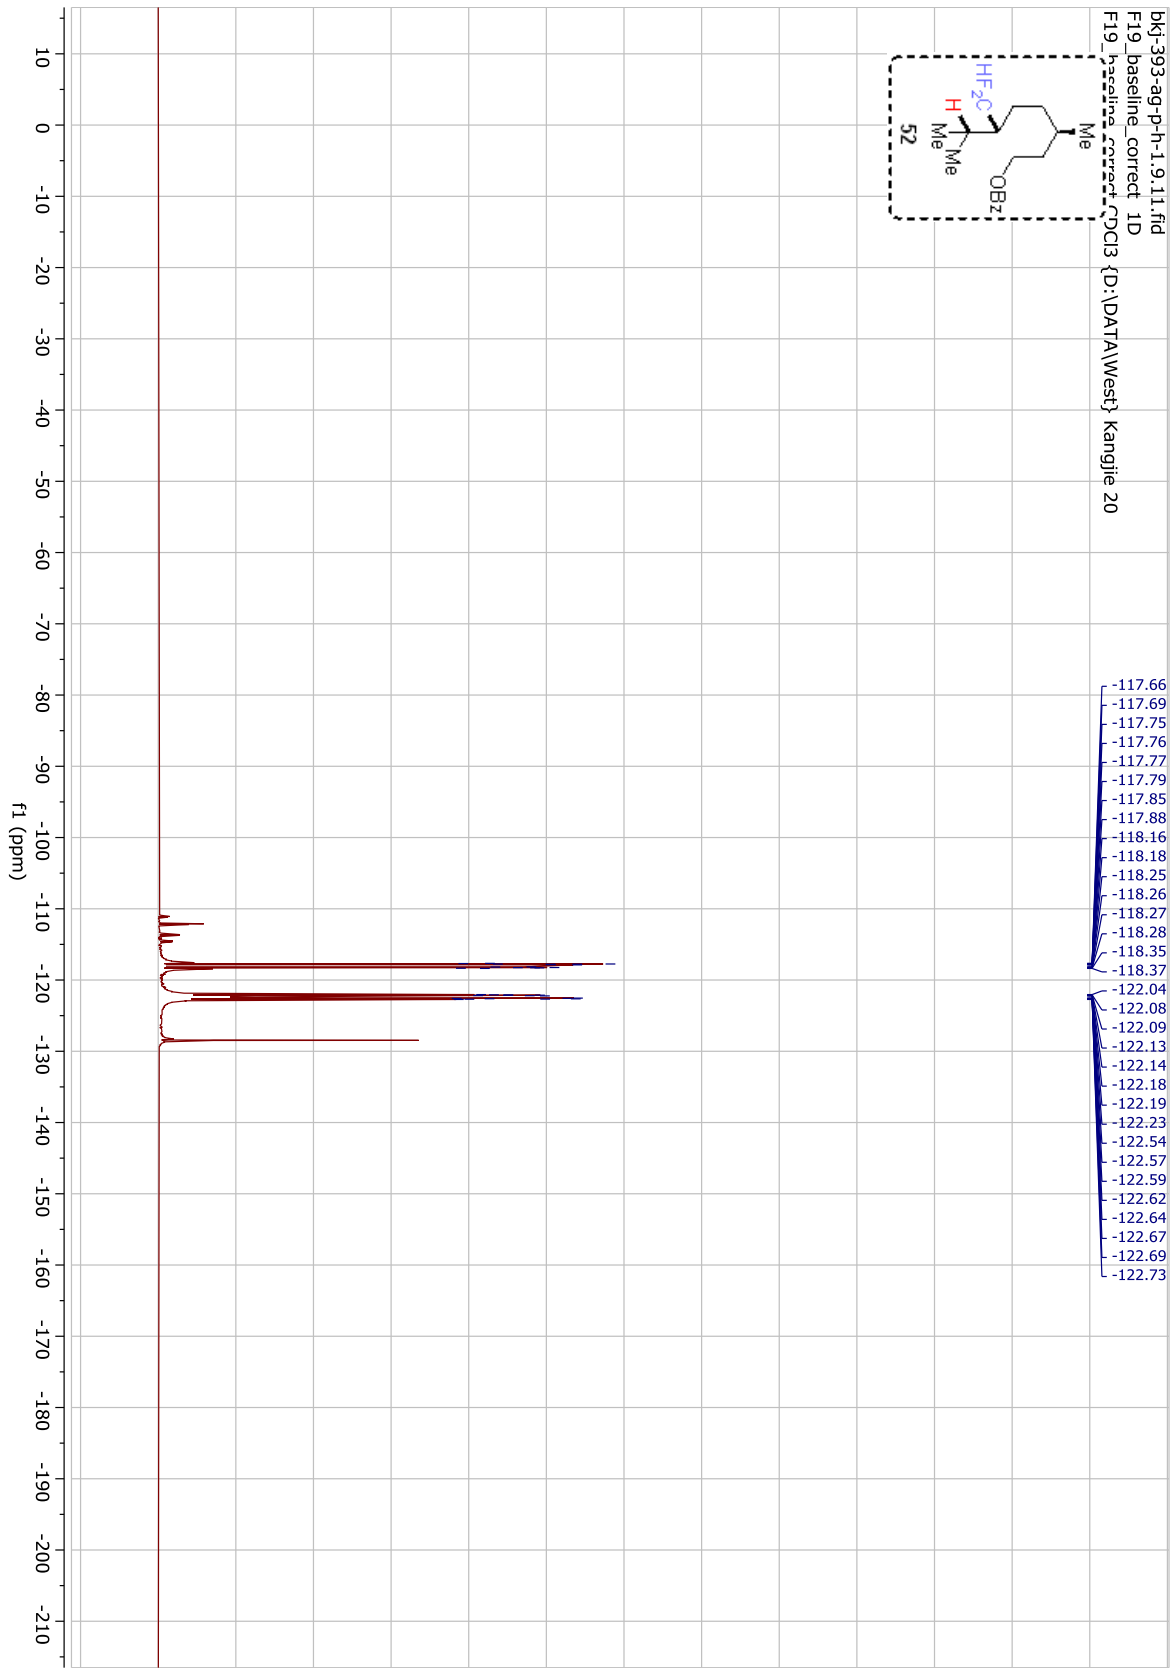

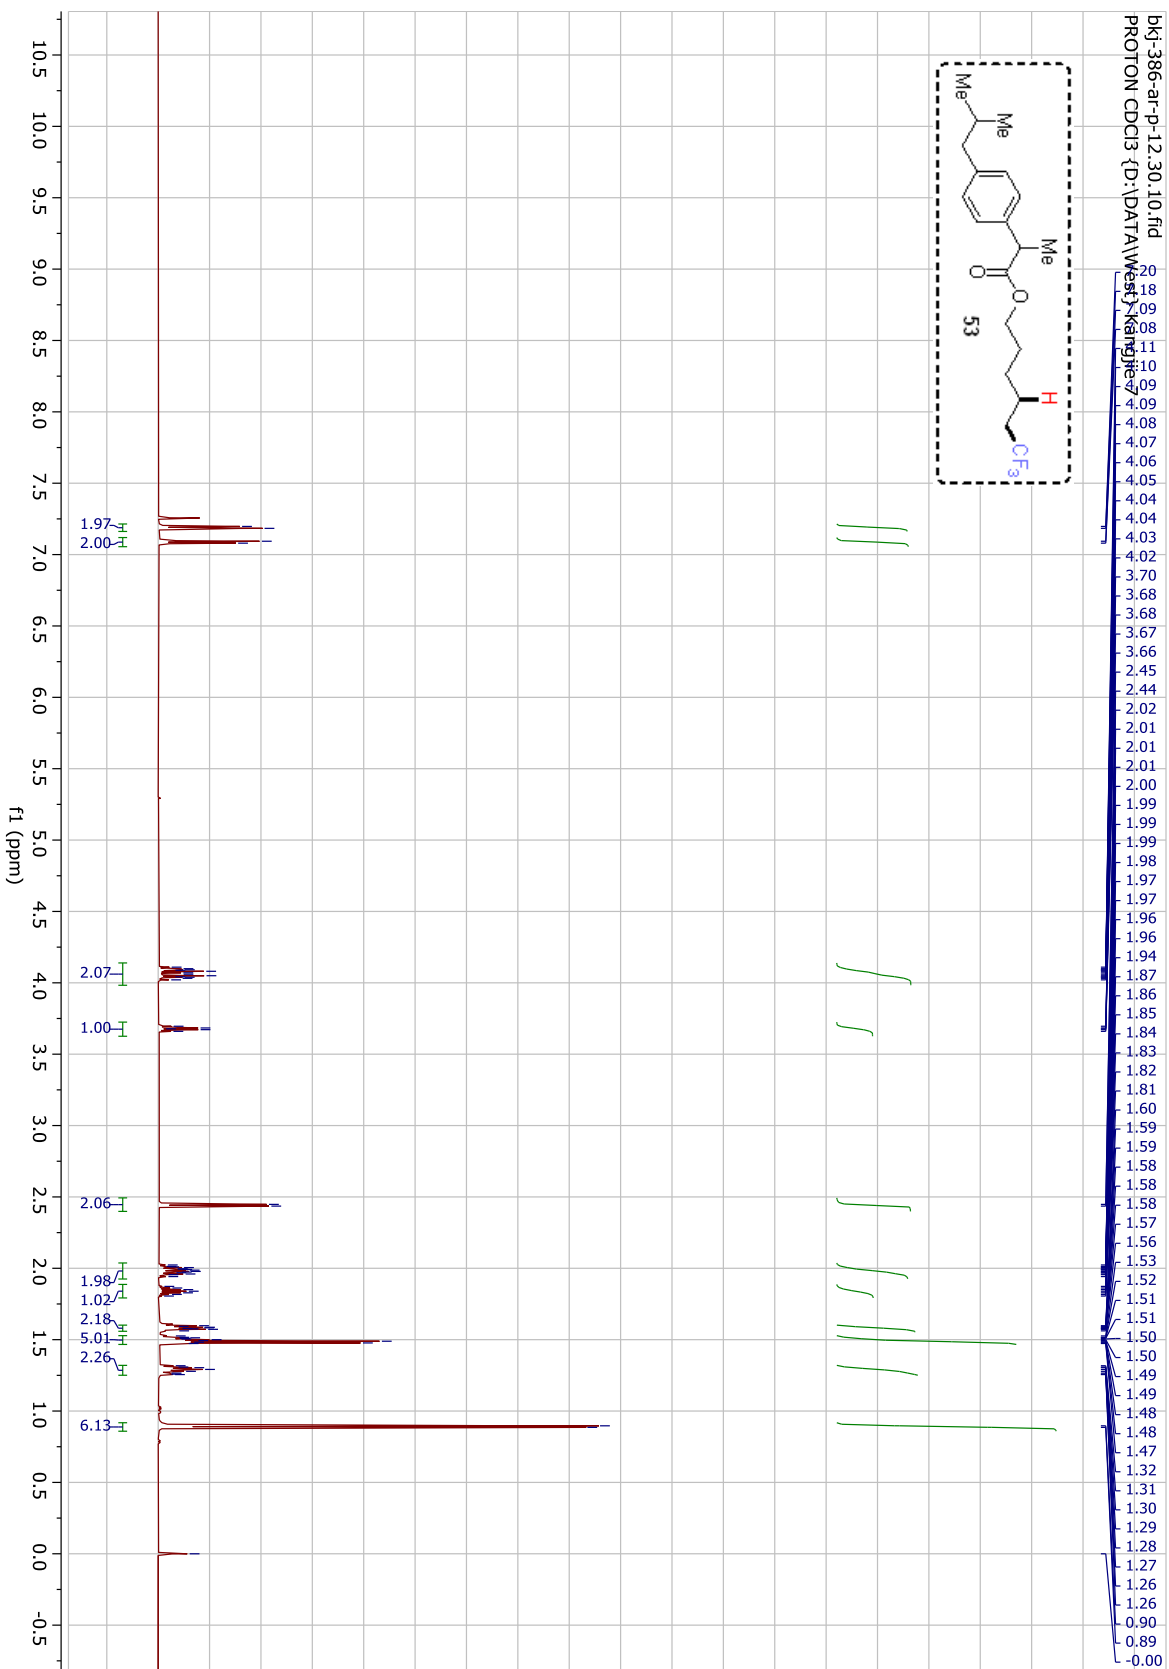



bk1-386-ar-p-12.30.13.fid  
C13CPD CDCl3 (D:\DATA\West)\Kangjie 7

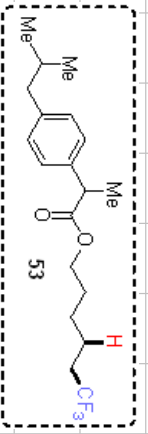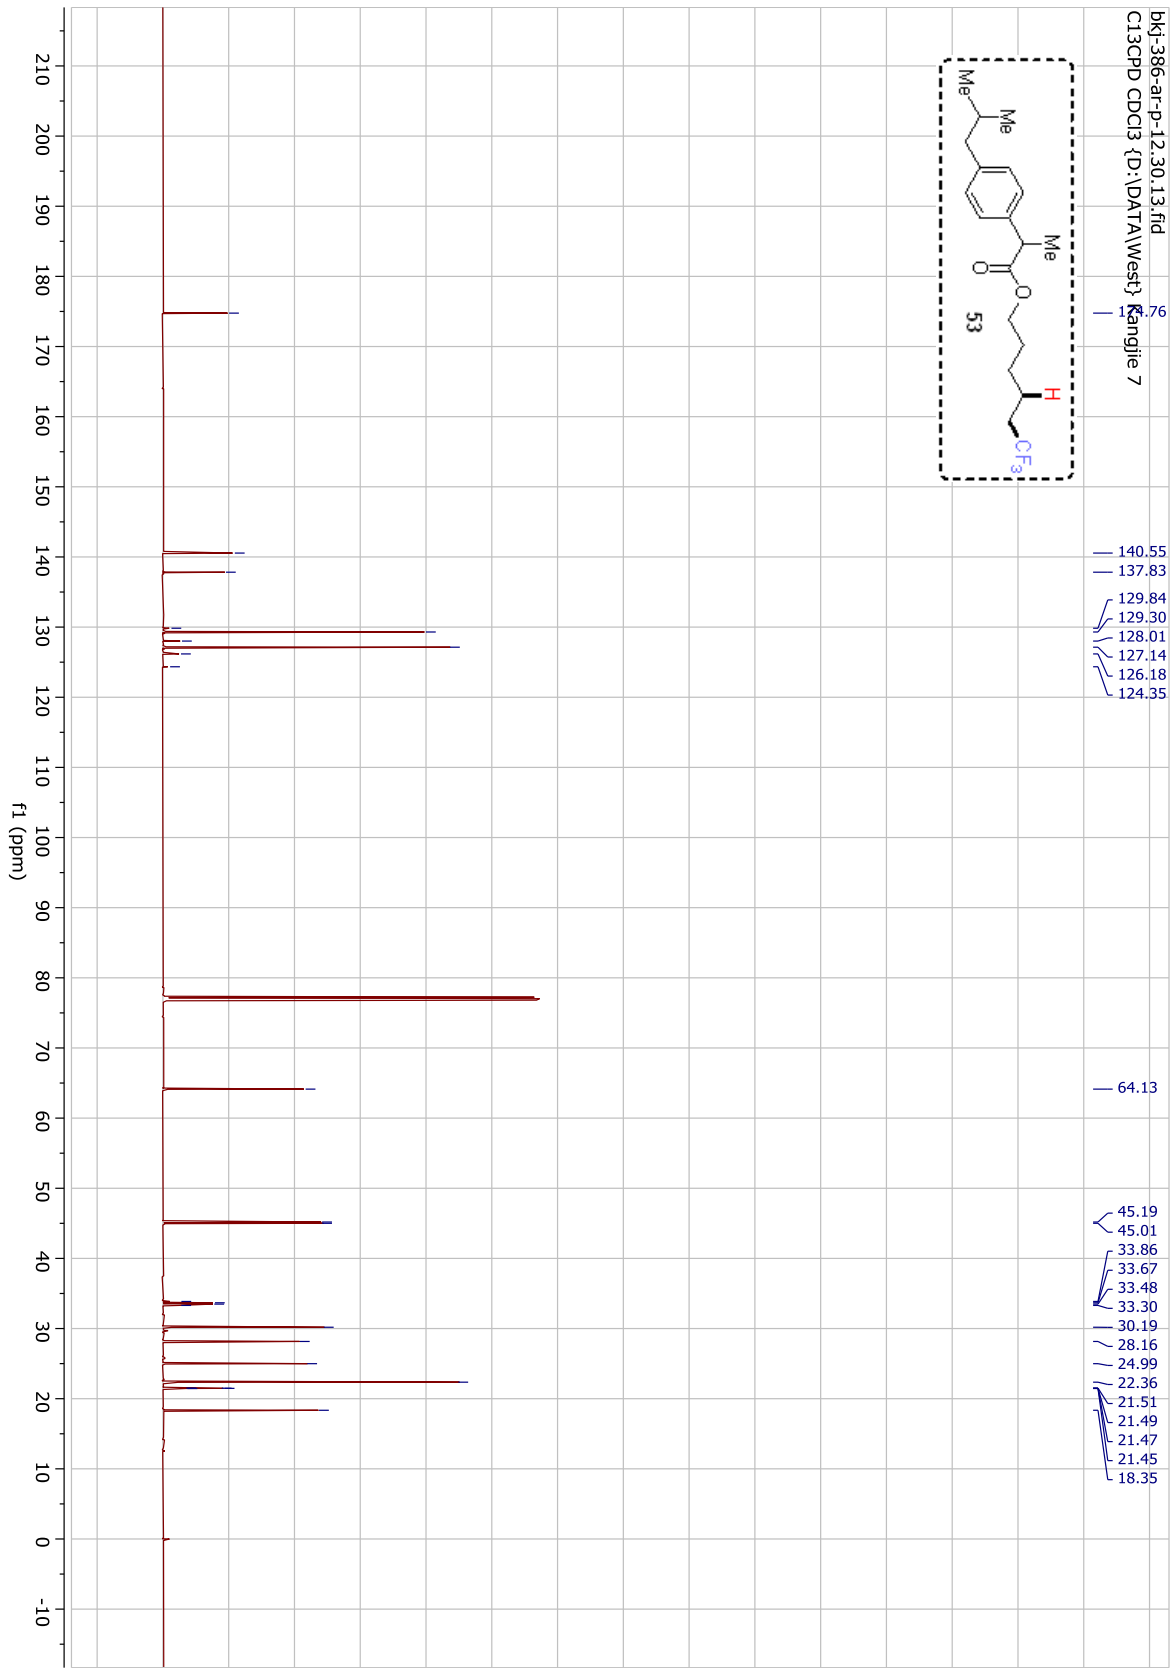

bkj-386-ar-p-12.30.12.ftd  
F19\_baseline\_correct 1D  
F19\_baseline\_correct CDC13 {D:\DATA\West\ Kangjie 7

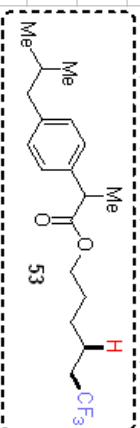

-66.40  
-66.42  
-66.44



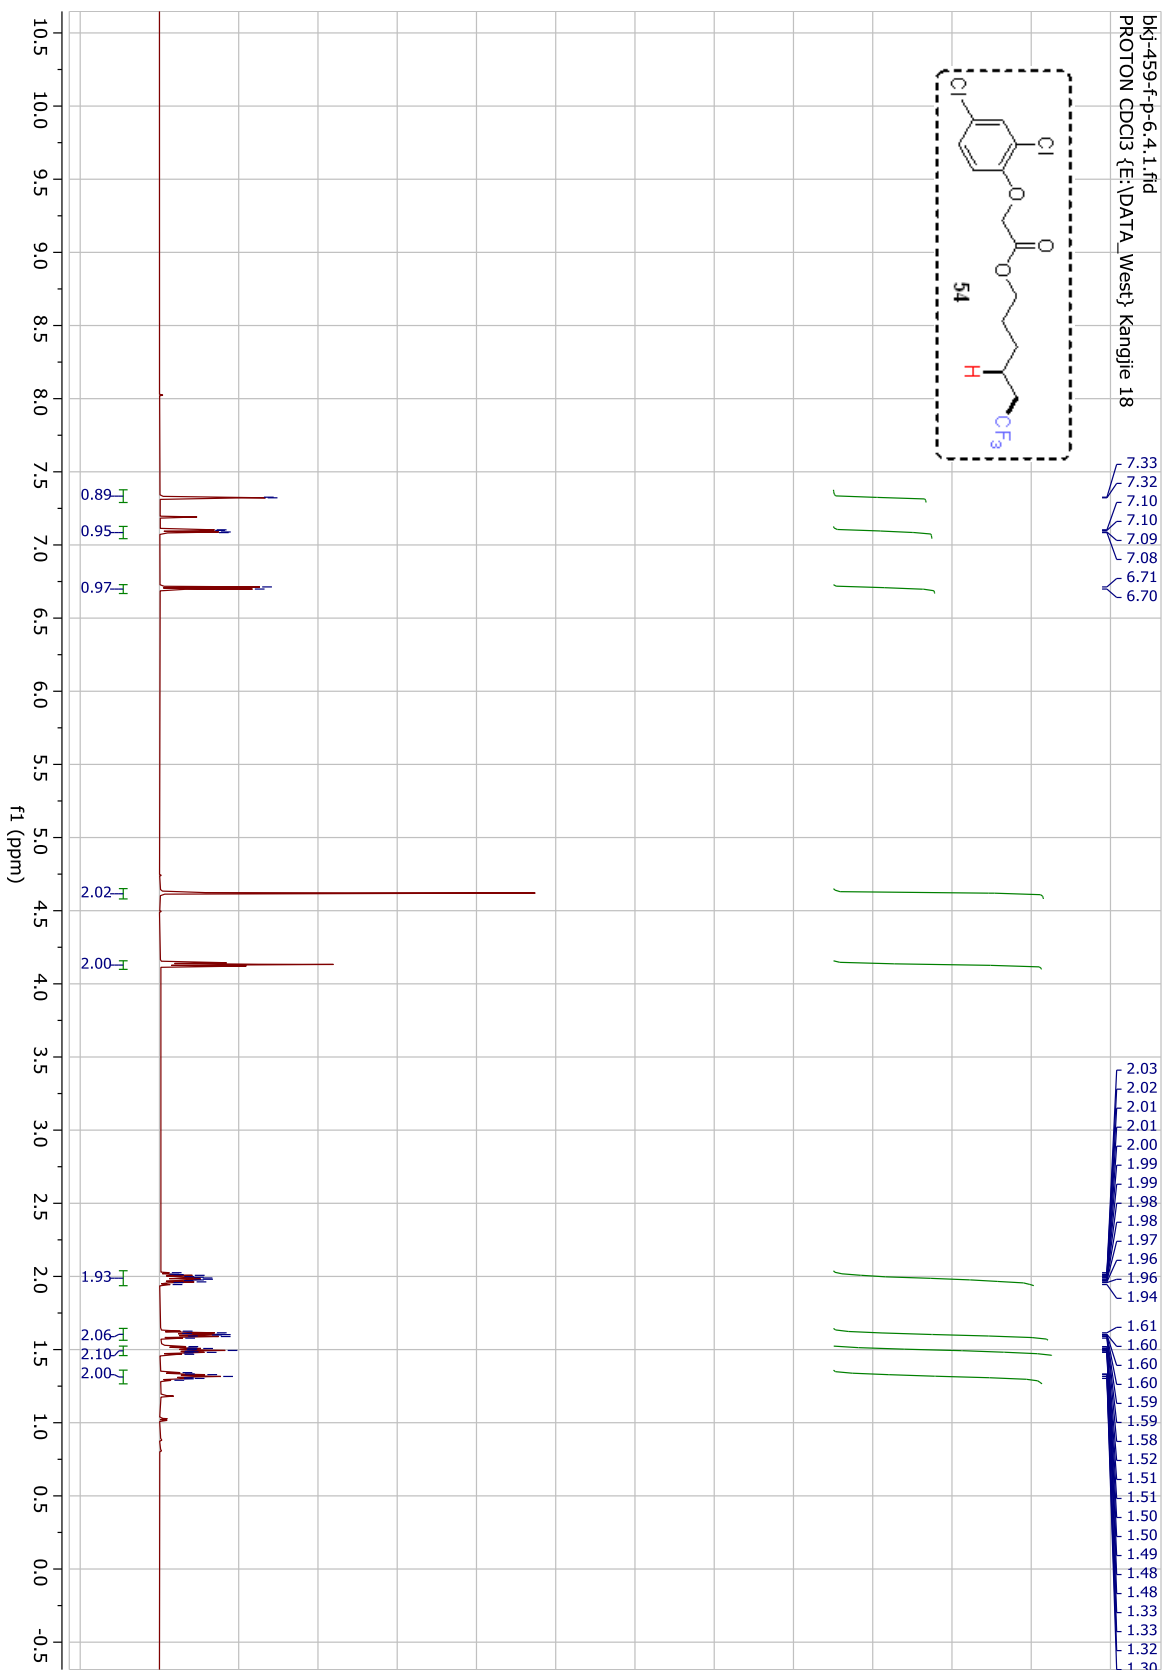

bkj-459-f-p-6-4-2.fid  
C13CPD.opt CDCl3 {E:\DATA\_Westf\Kaggle 18

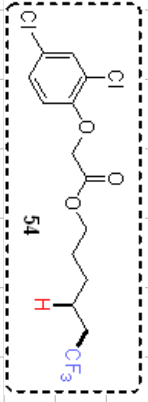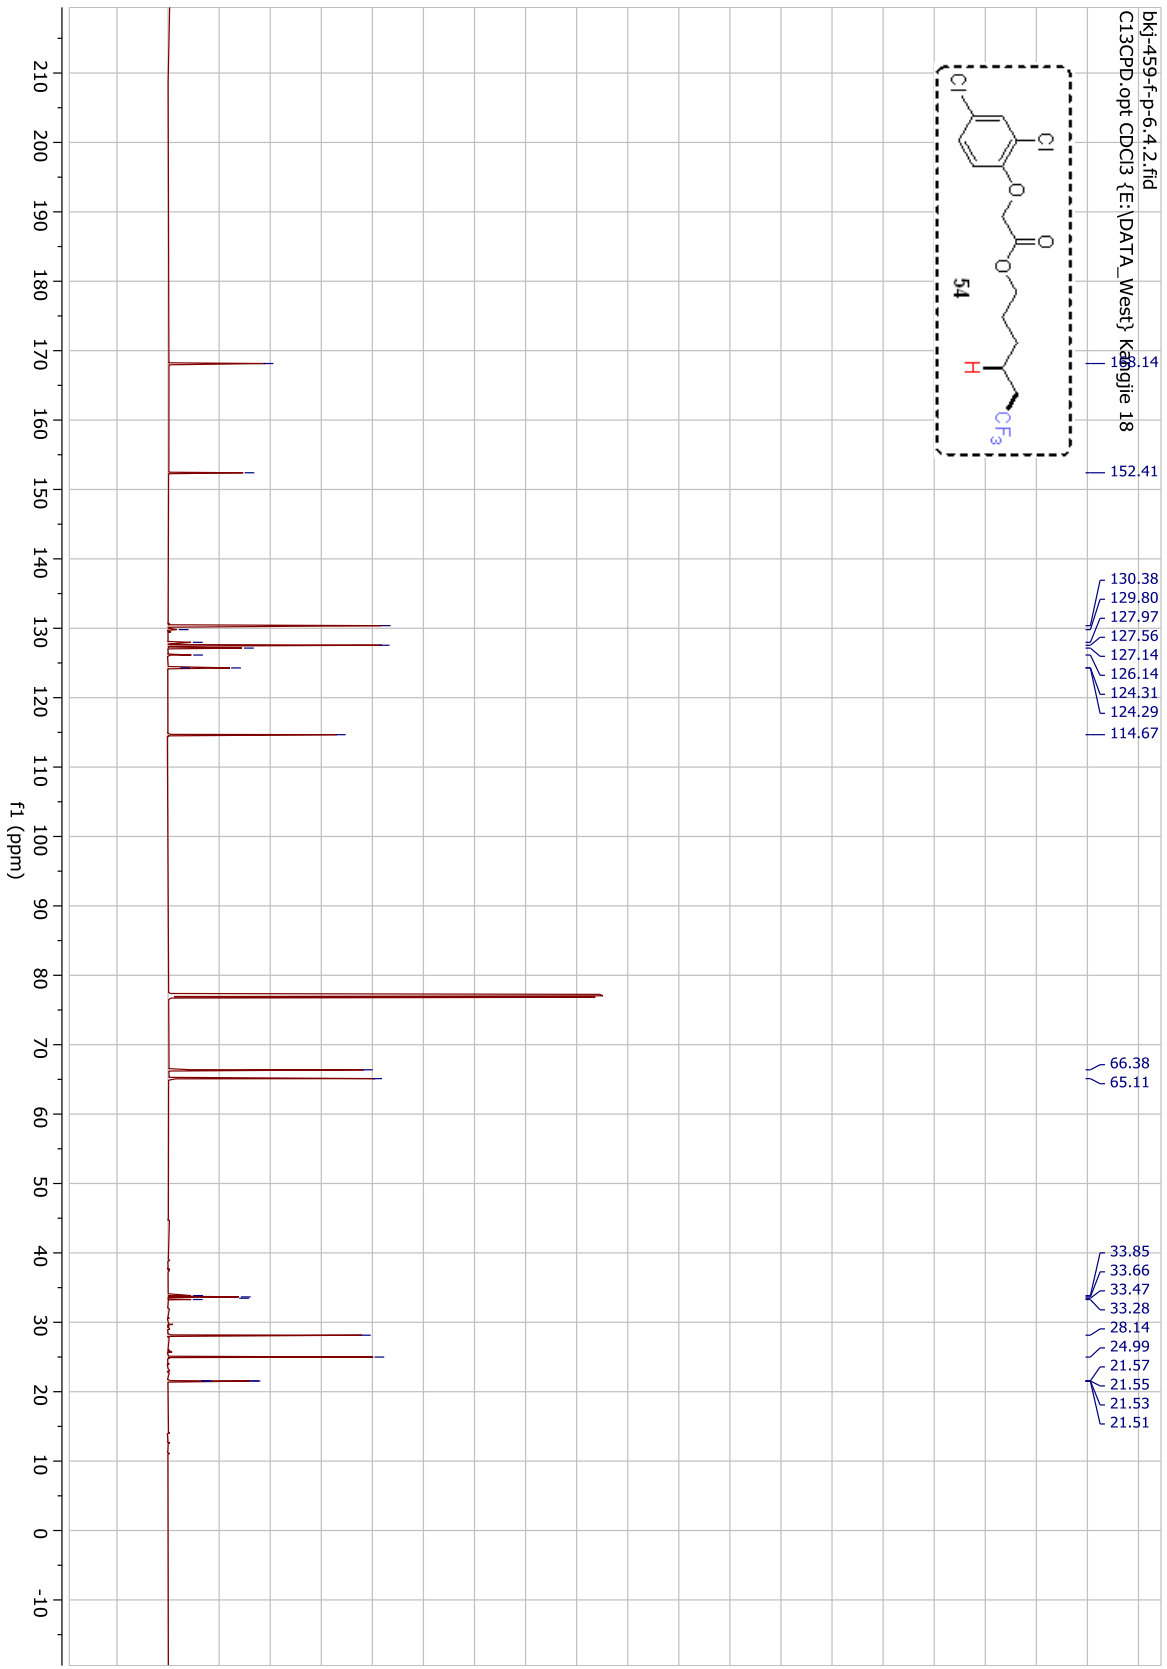

bkj-459-f-p-f-6.5.10.ftd  
F19

CMC\_F19.CDCI3 (D:\DATA\West\Kantile 21

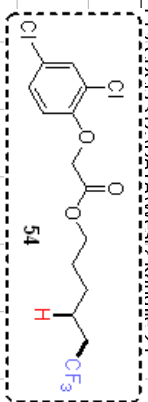

-66.34  
-66.36  
-66.38

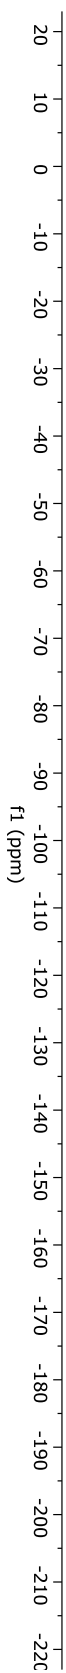

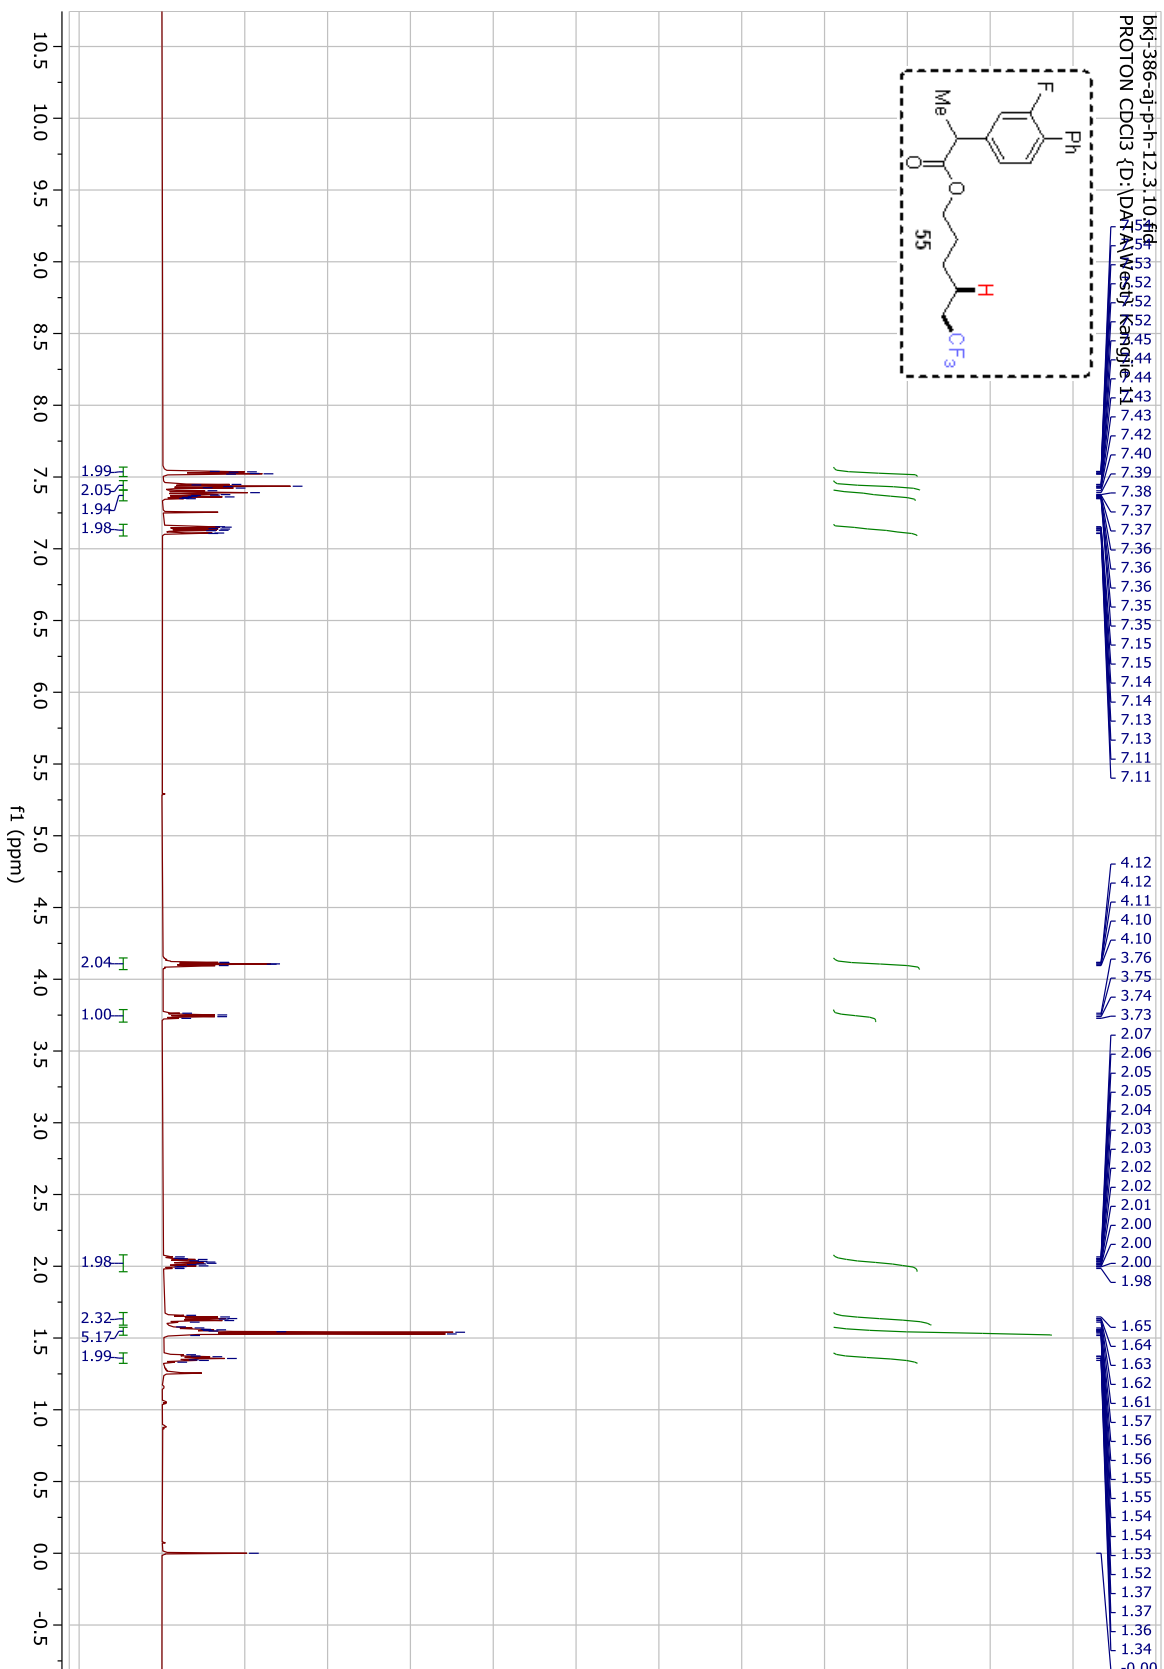

bj1-386-aj-p-h-12.3.12.fid  
C13CPD CDCl3 (D:\DATA\Westy K\Engle 11

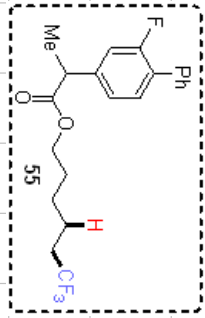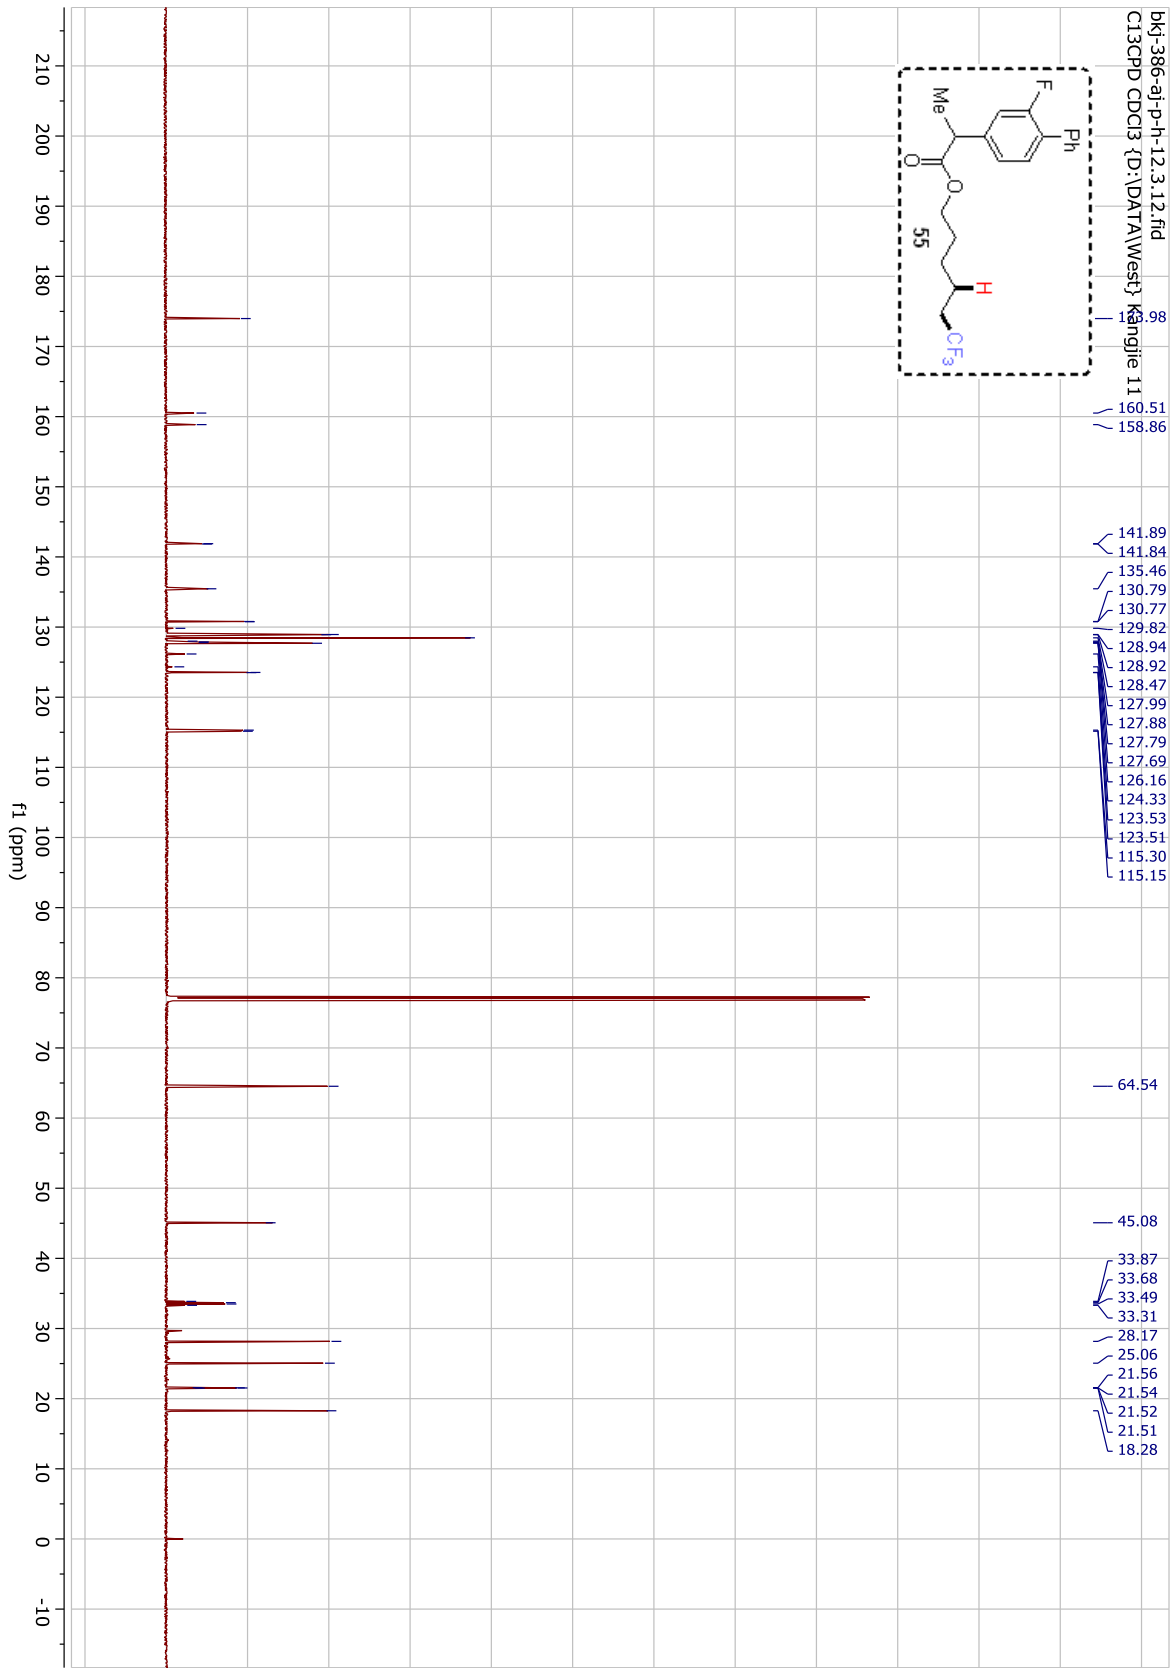

bkj-386-aj-p-h-12.3.11.fid  
F19\_baseline\_correct ID  
F19\_baseline\_correct CDCl3 {D:\DATA\West} Kangjie 11

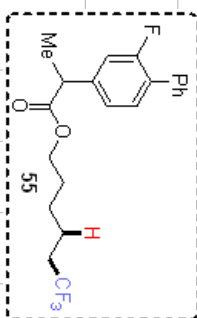

-66.34  
-66.36  
-66.38

-117.65  
-117.67  
-117.67  
-117.69





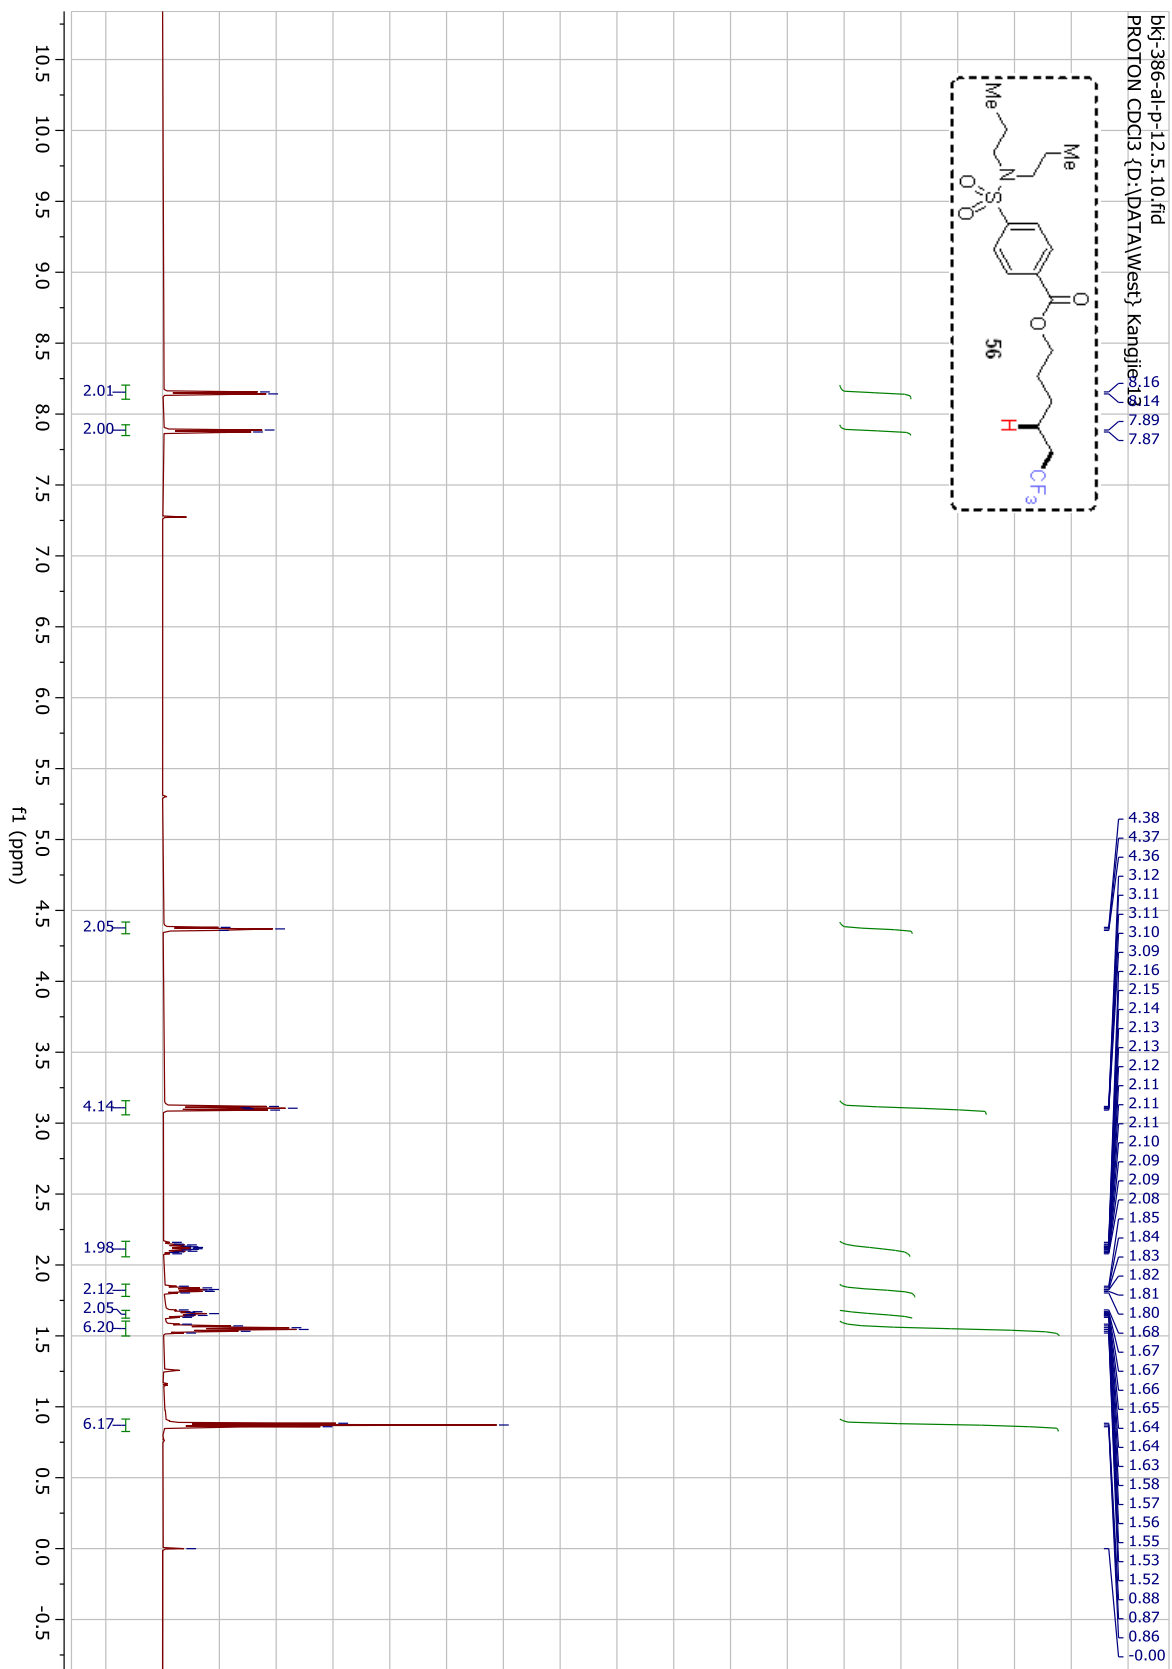

bk1-386-al-p-12.5.12.fid  
C13CPD CDCl3 (D:\DATA\Westj\_Kangjie\_93

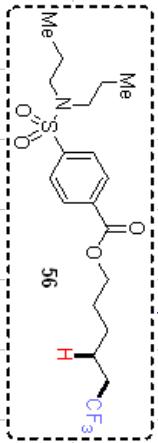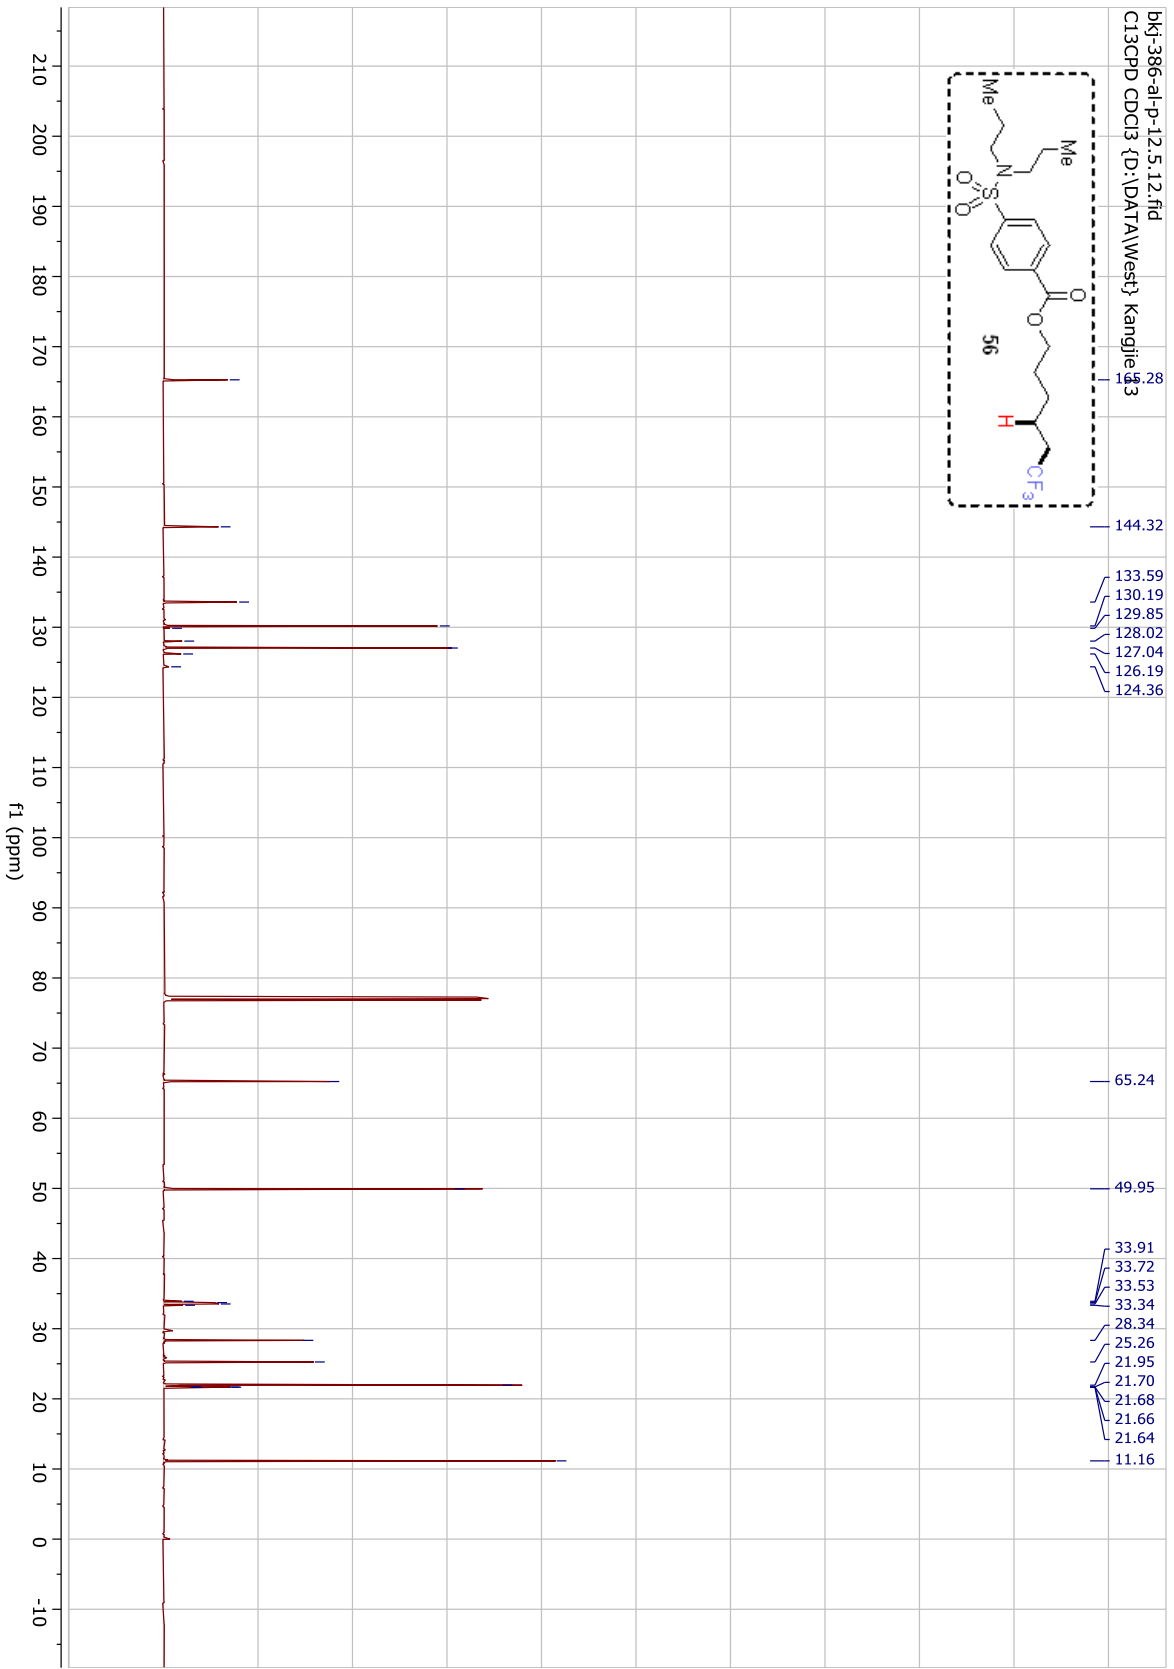

bkj-386-al-p-12.5.11.fid  
F19\_baseline\_correct ID  
F19\_baseline\_correct CDCl3 {D:\DATA\West} Kangjie 13

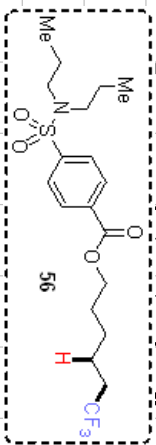

-66.33  
-66.35  
-66.37



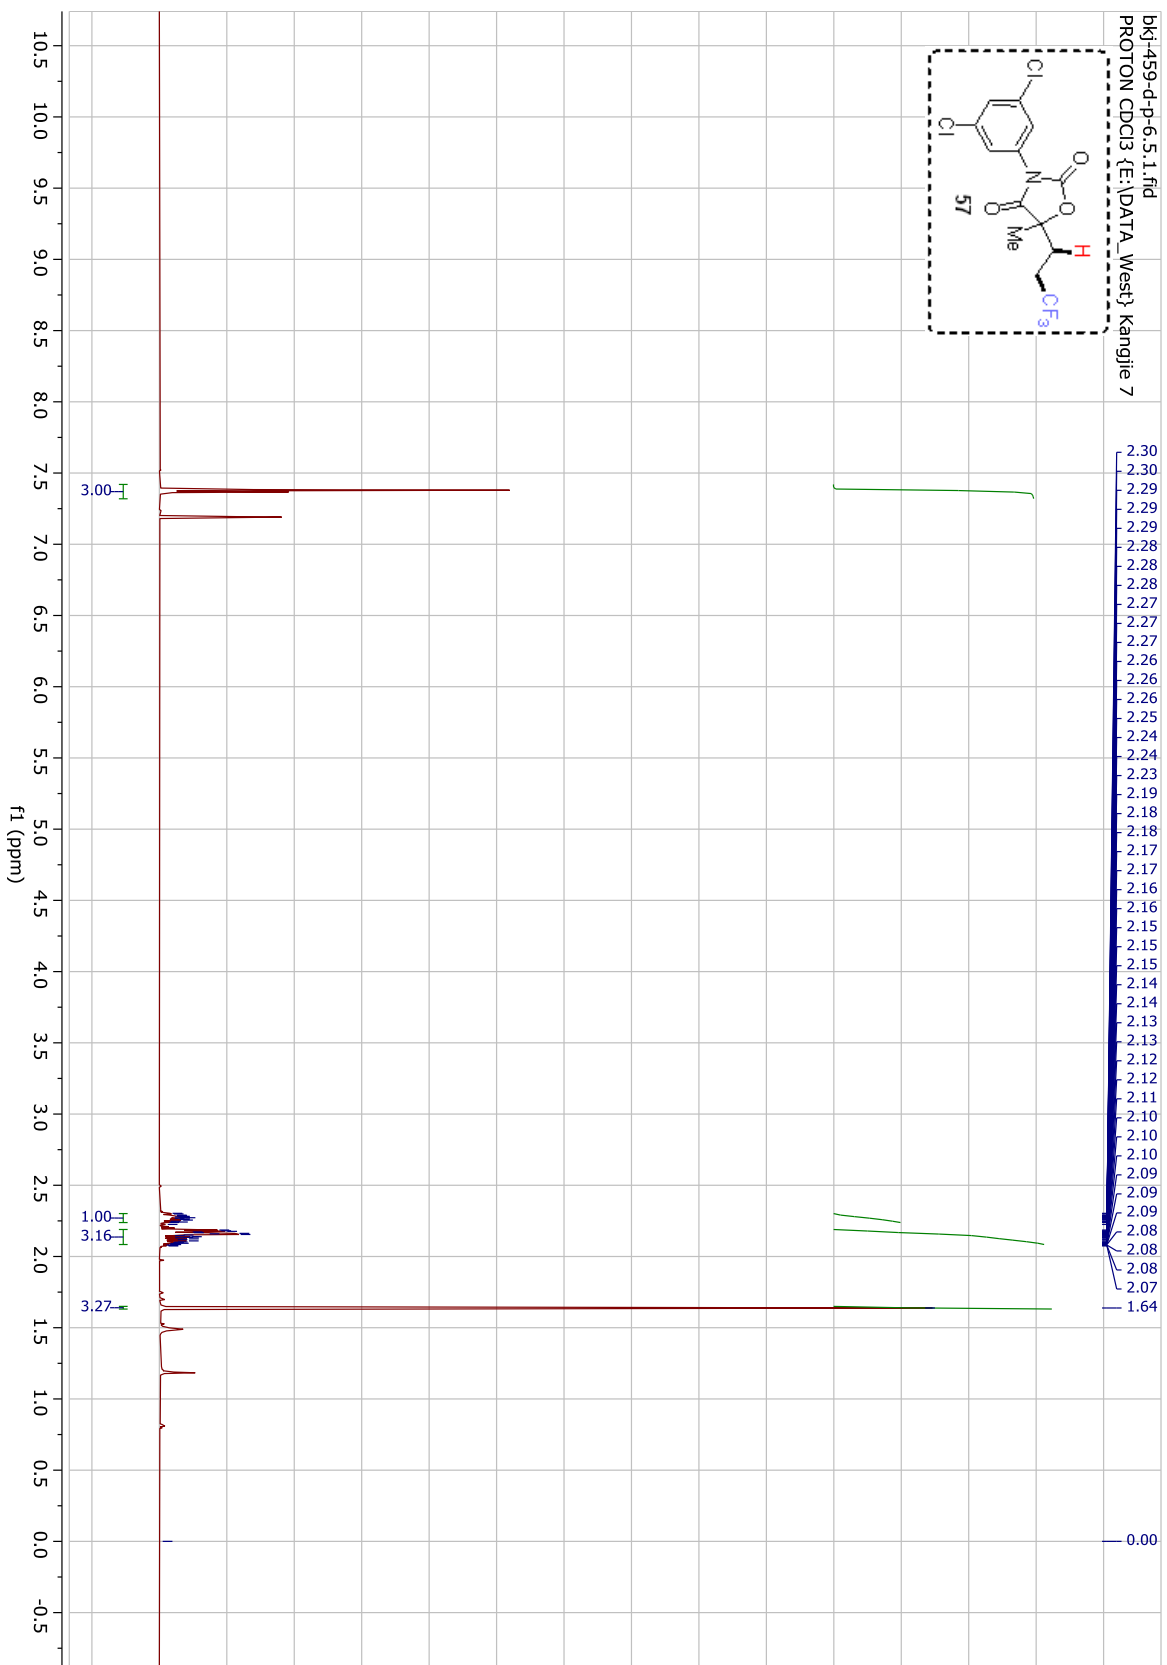

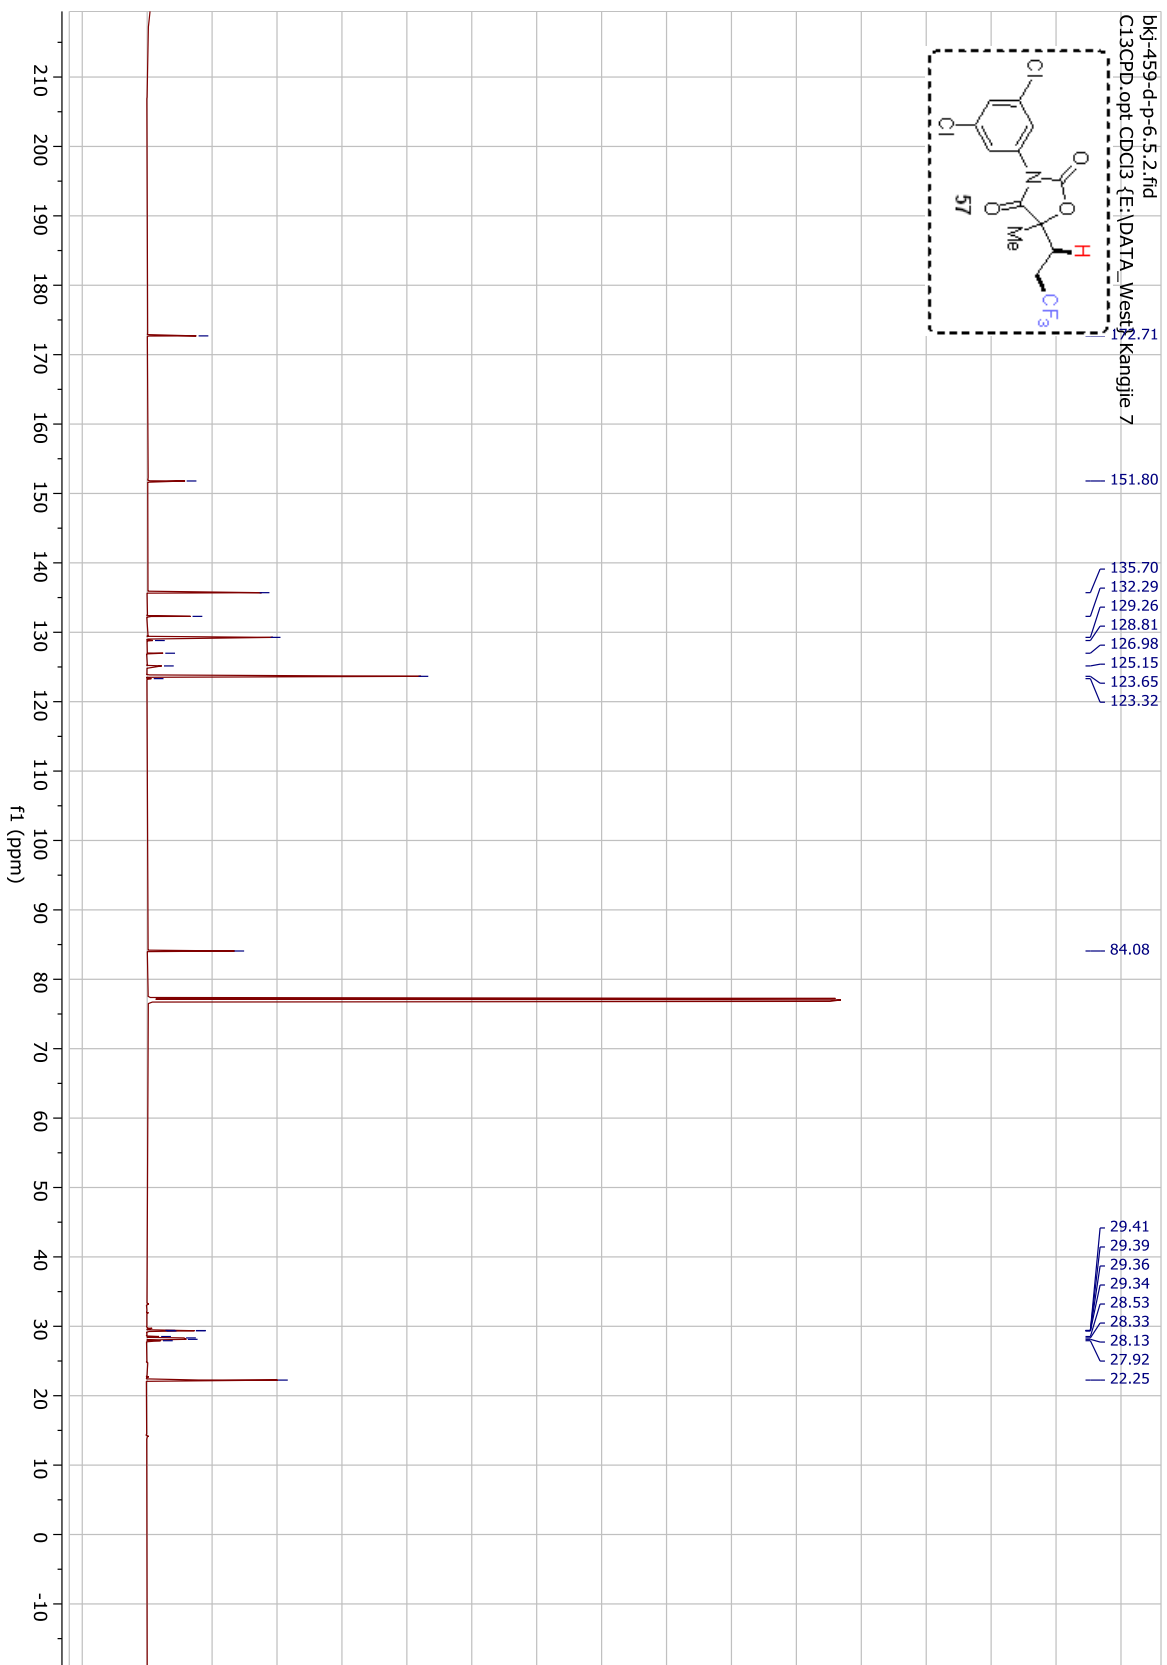

bkj-459-d-p-f-6.6.30.fid  
F19

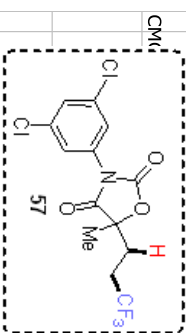

-66.38  
-66.40  
-66.41



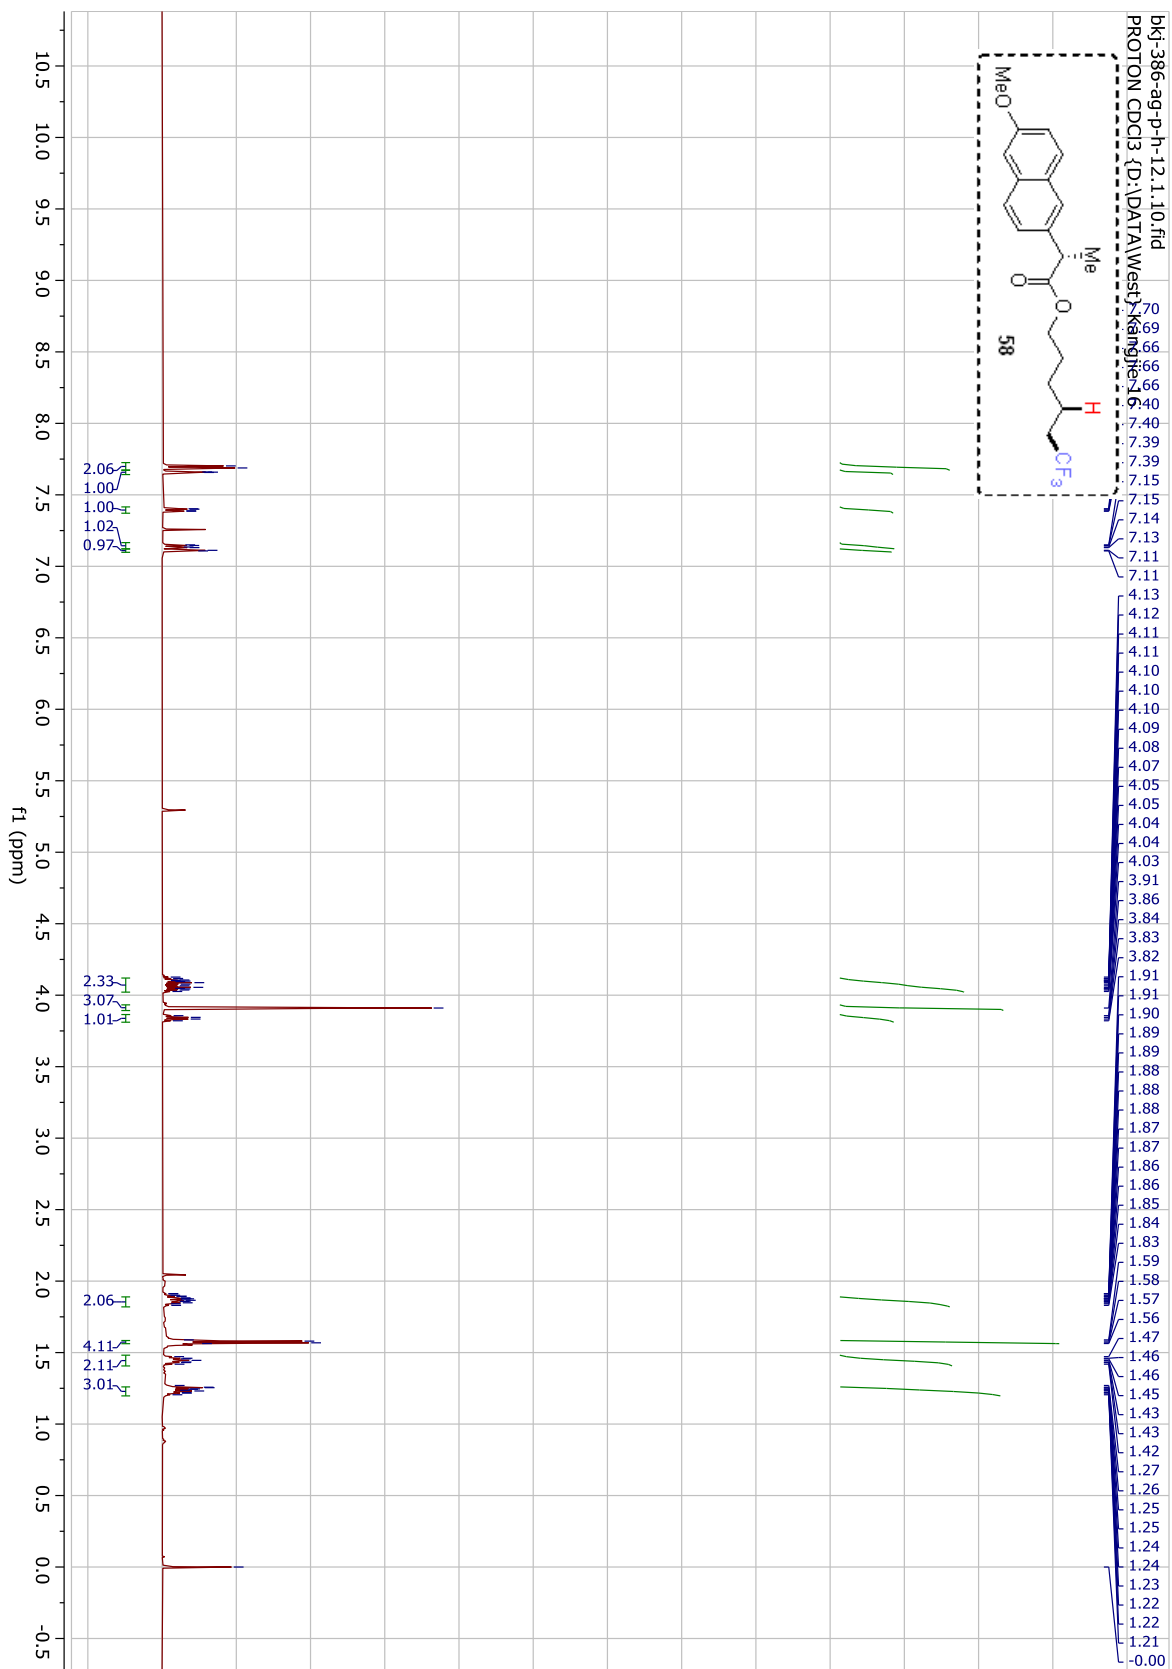

hkl-386-ag-p-c-12.3.10.fid  
C13CPD CDCl3 (D:\DATA\West) Sample 7

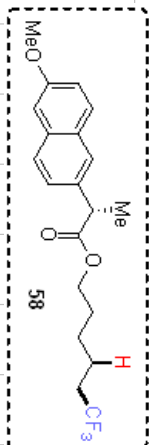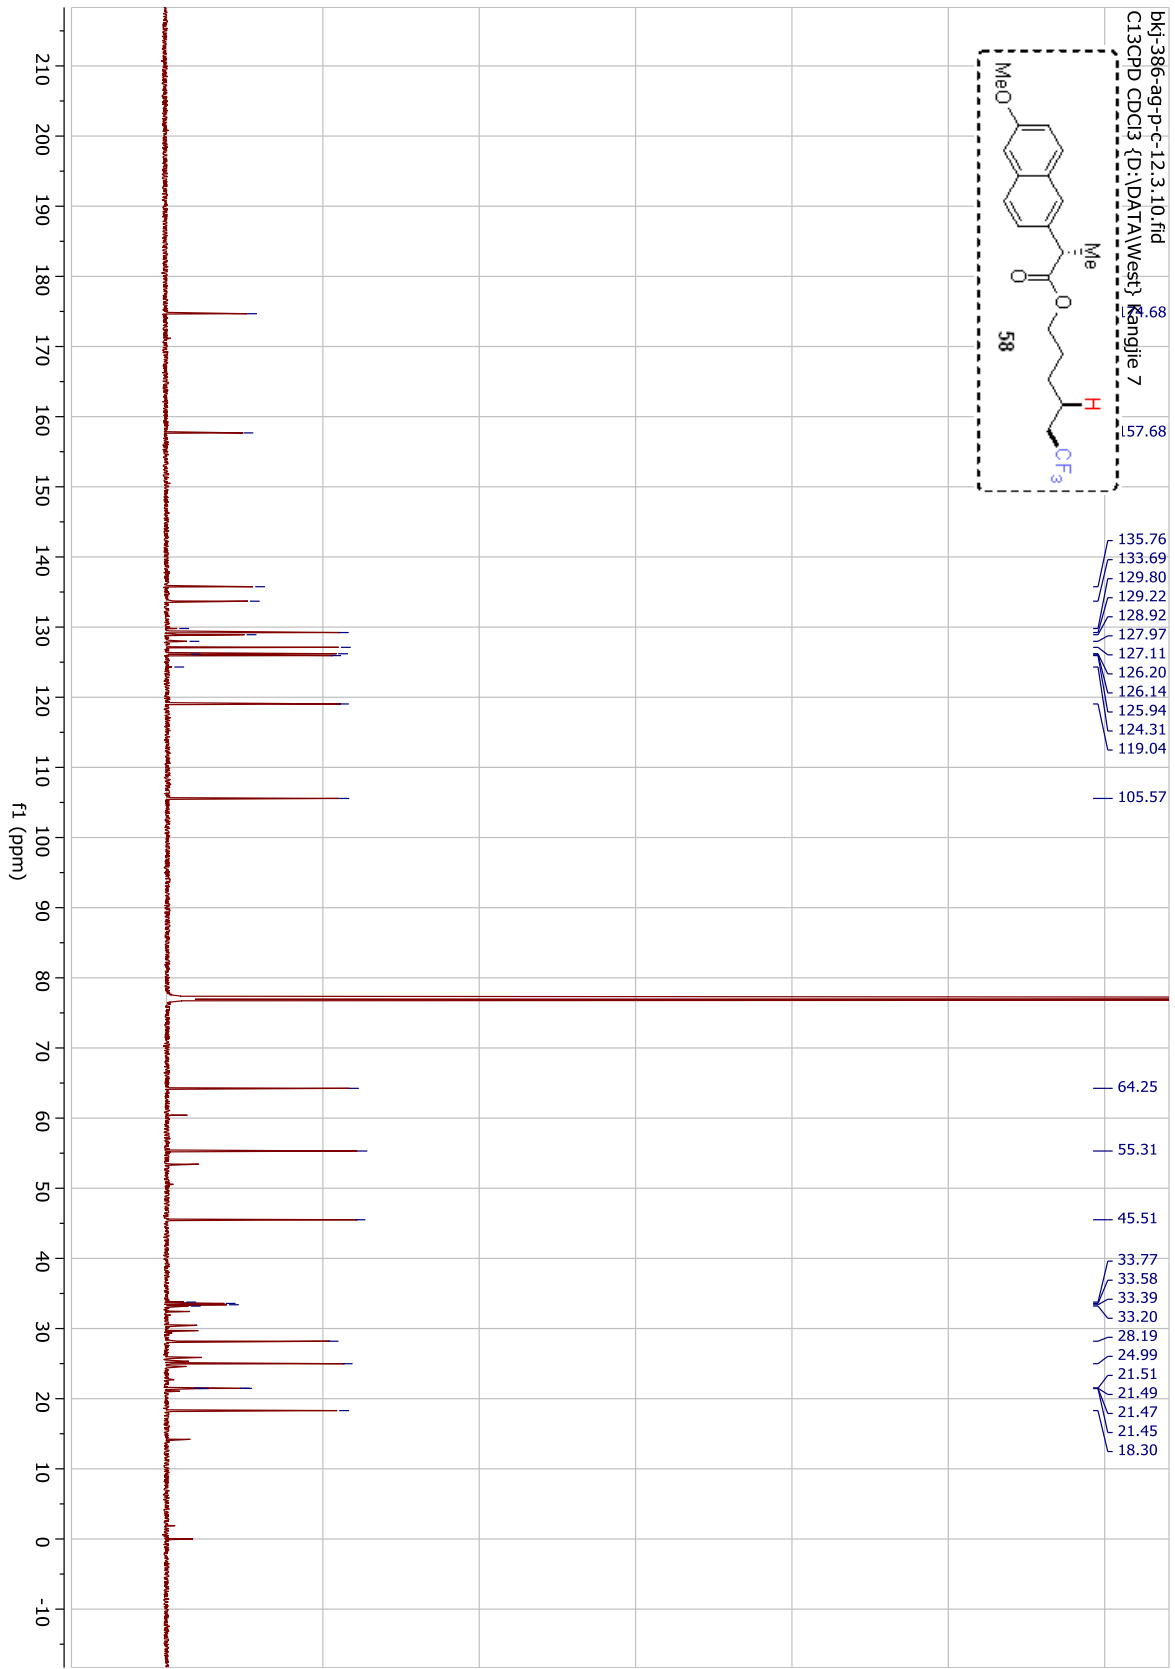



bkj-386-ag-p-h-12.1.11.ftd  
F19\_baseline\_correct\_ID

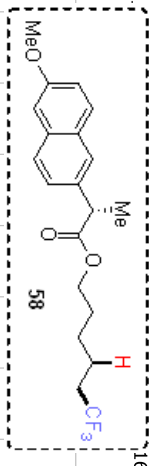

-66.42  
-66.44  
-66.46



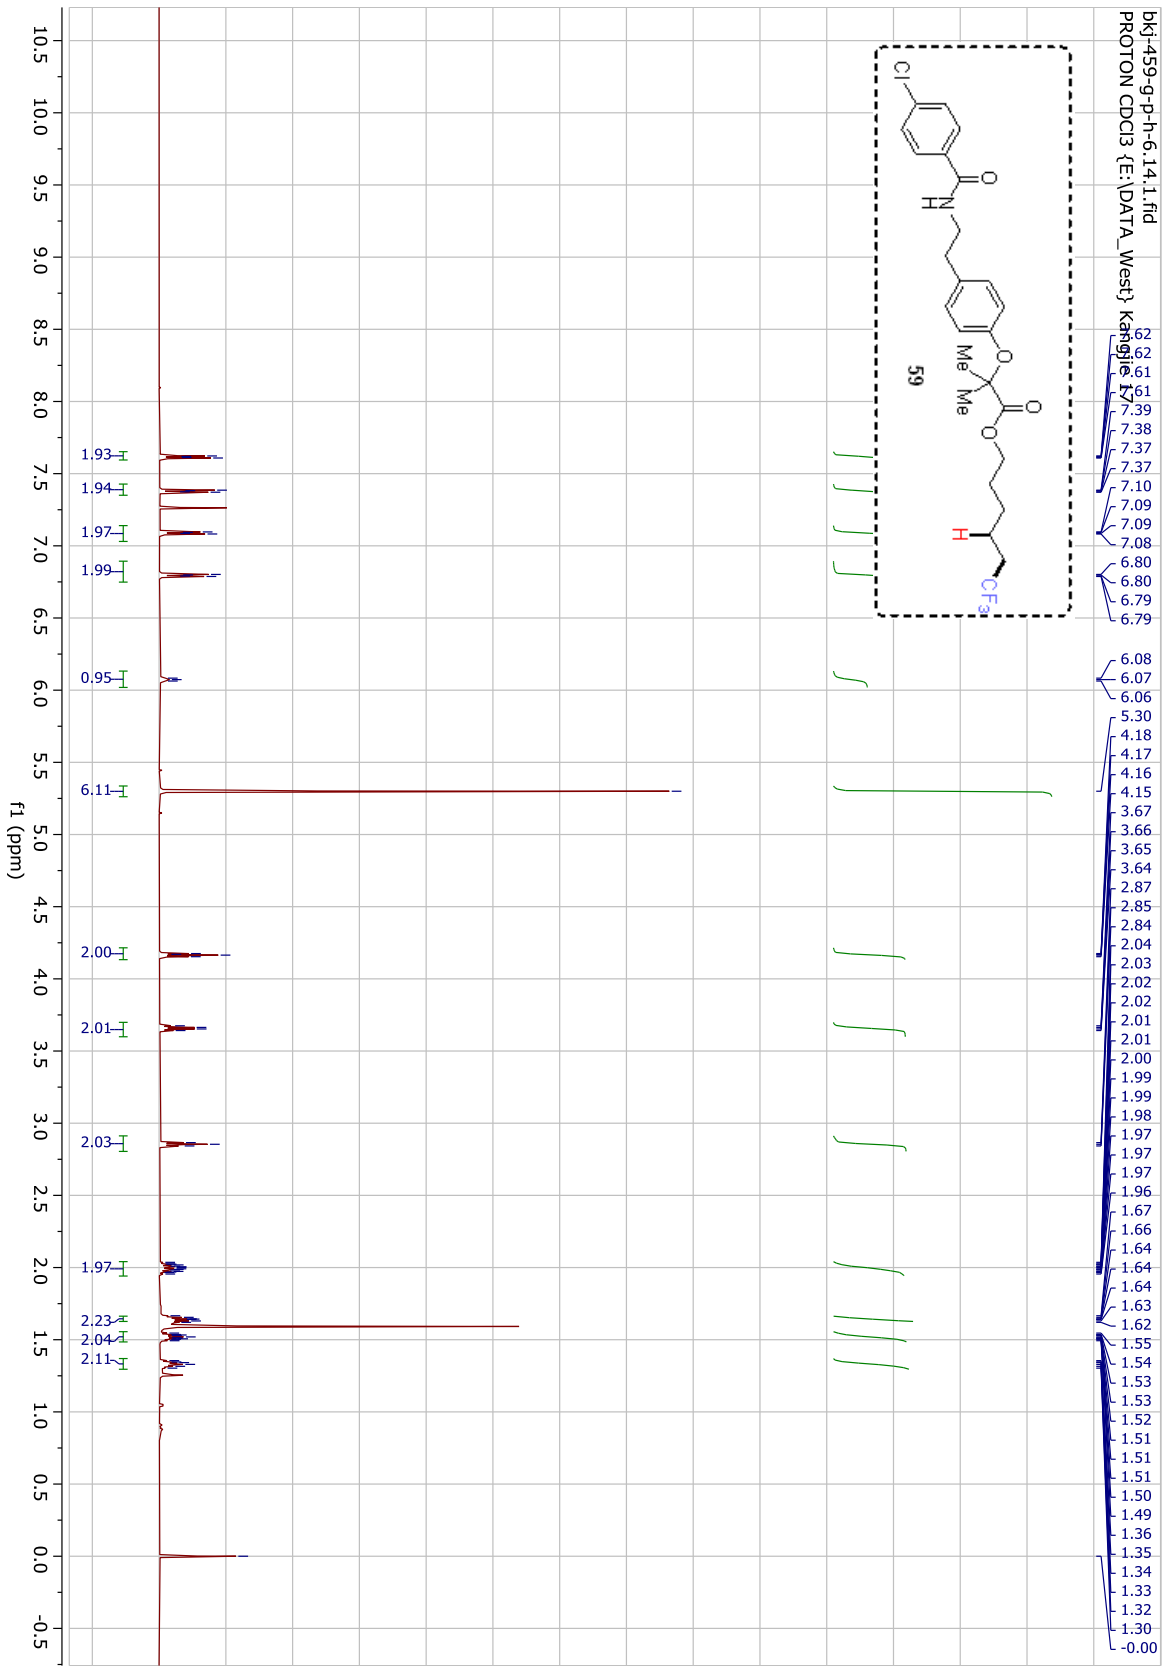

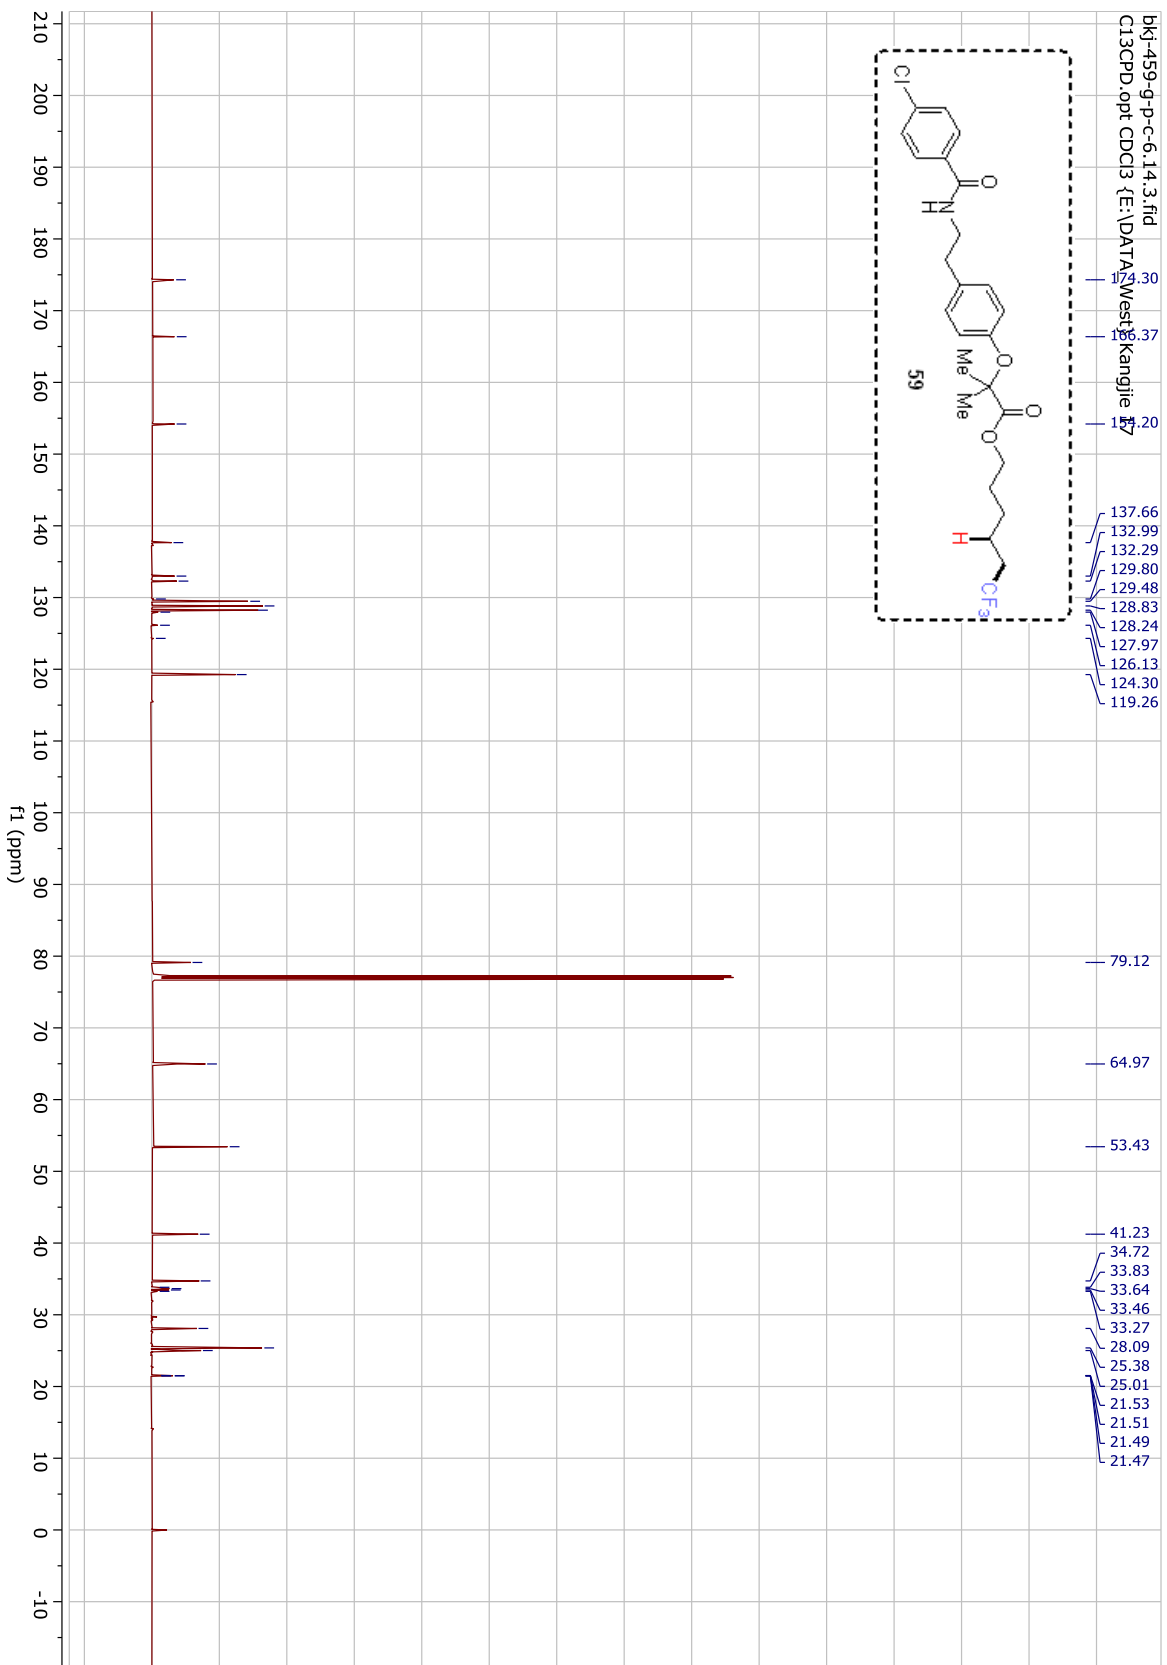

bkj-459-g-p-f-6.15.10.ftd  
F19

CMC-F19.CDCI3.FD\DATA\West\Kantile 17

-66.31  
-66.33  
-66.35

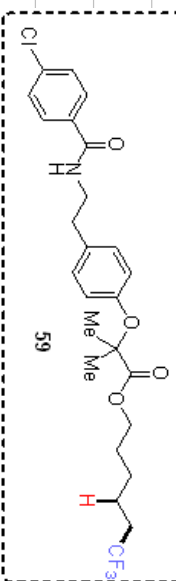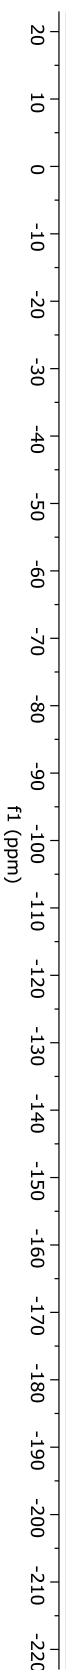

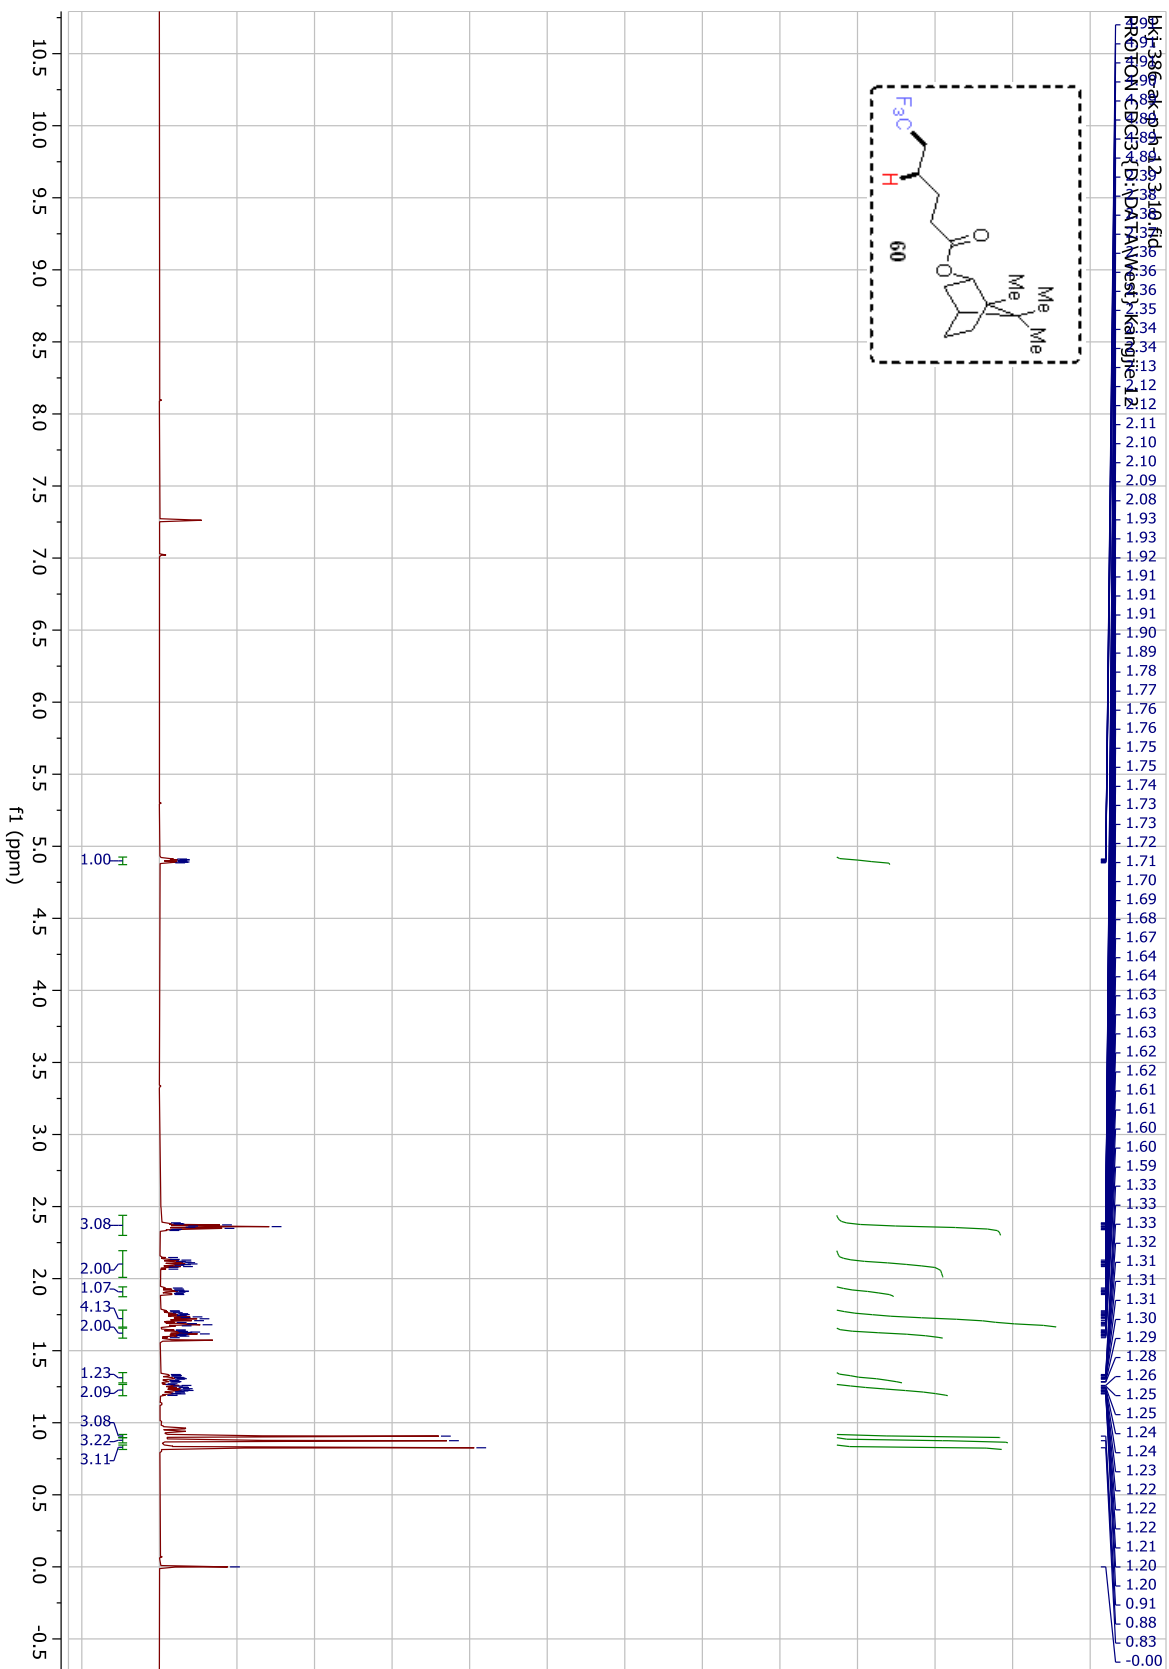

bkj-386-ak-p-12.5.12.fid  
C13CPD CDCl3 (D:\DATA\West)\K28912

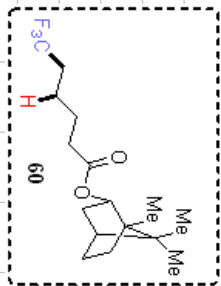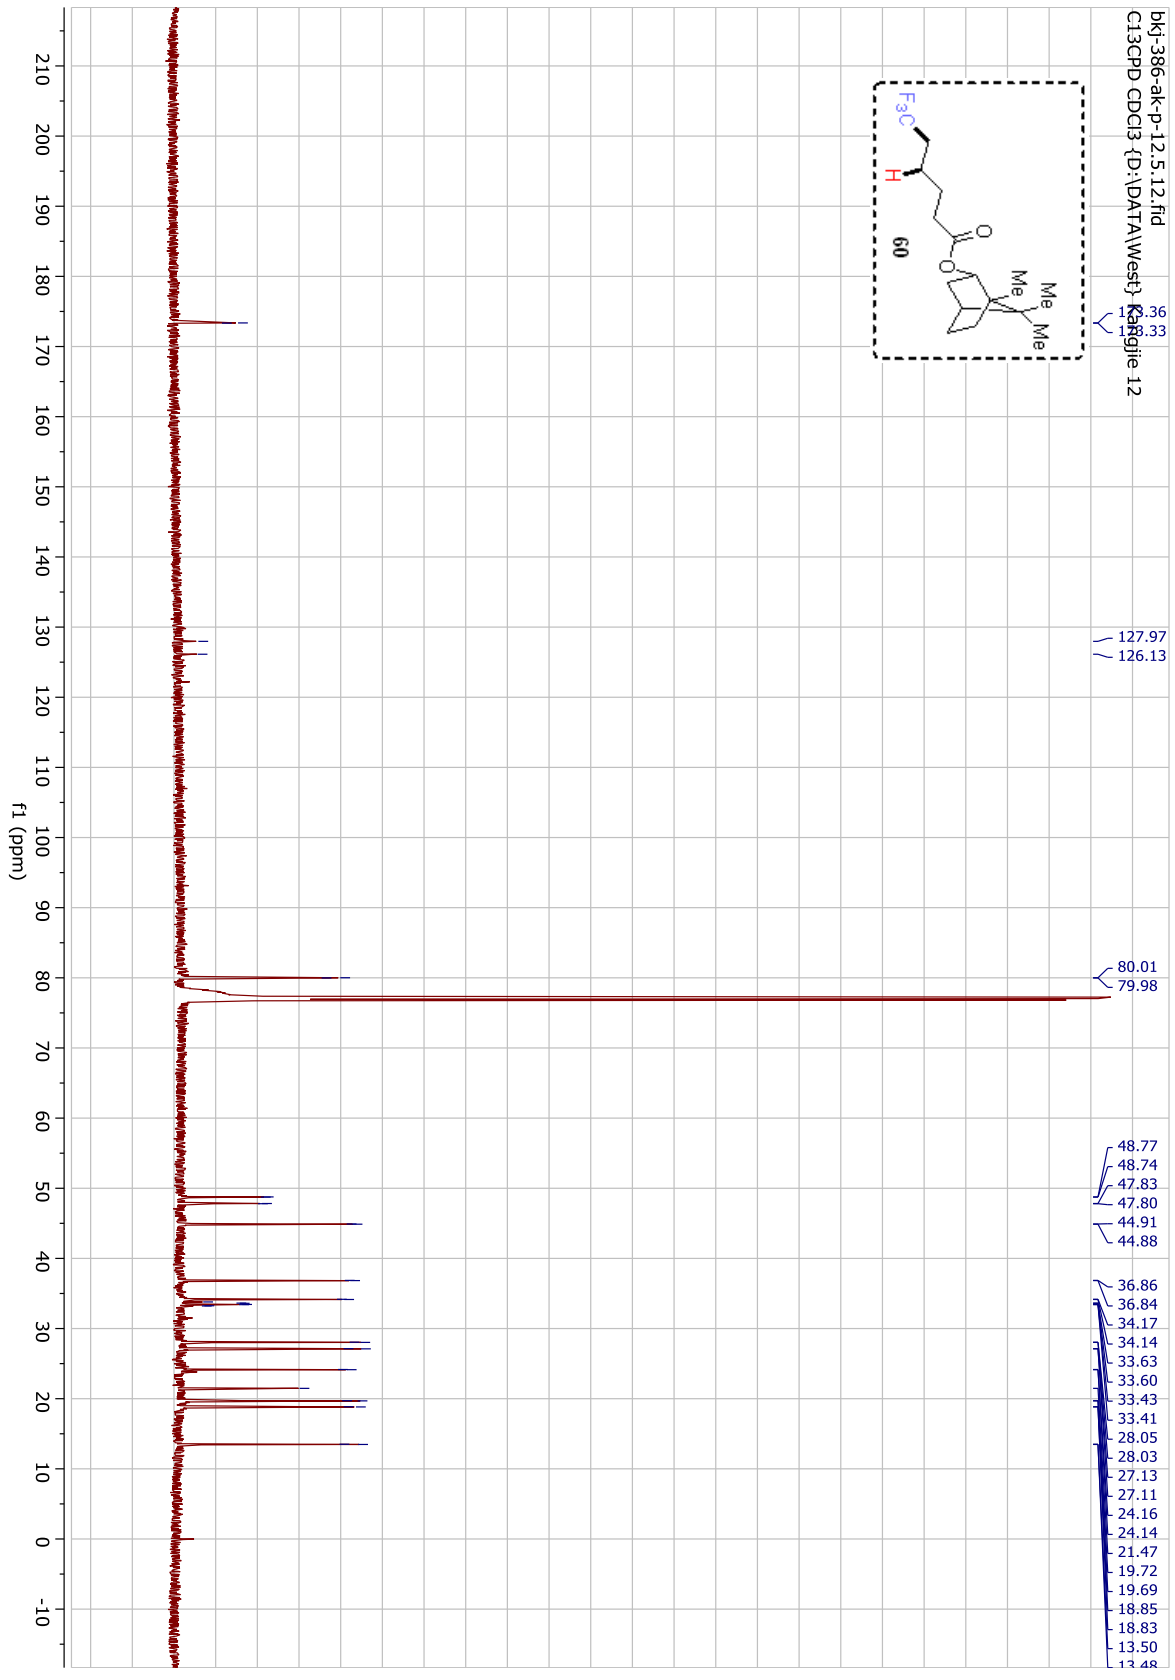

bkj-386-ak-p-h-12.3.11.fid  
F19\_baseline\_correct ID  
F19\_baseline\_correct CDCI3 {D:\DATA\West\ Kangjie 12

-66.37  
-66.39  
-66.41

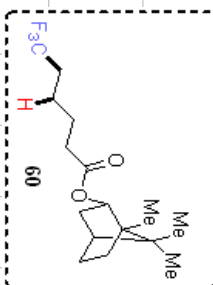

bk1-386-au"-p-h-1.2.12.fid  
F191-BBMR-500MHz-1Doforom-5-70.14 (dJ = 4.3 Hz).  
F19\_baseline\_correct CDCl3 {D:\DATA\West\ Kangjie 3

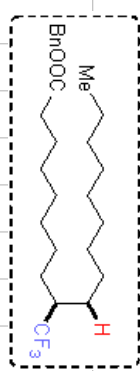

-70.12  
-70.12  
-70.13  
-70.14

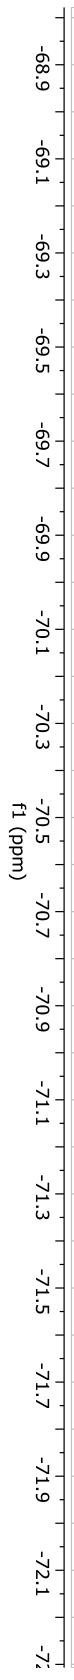





bkj-386-at-p-h-12.30.12.fid  
C13CPD CDCl3 (D:\DATA\Wes) 2  
Kangjie 3

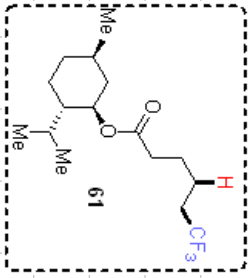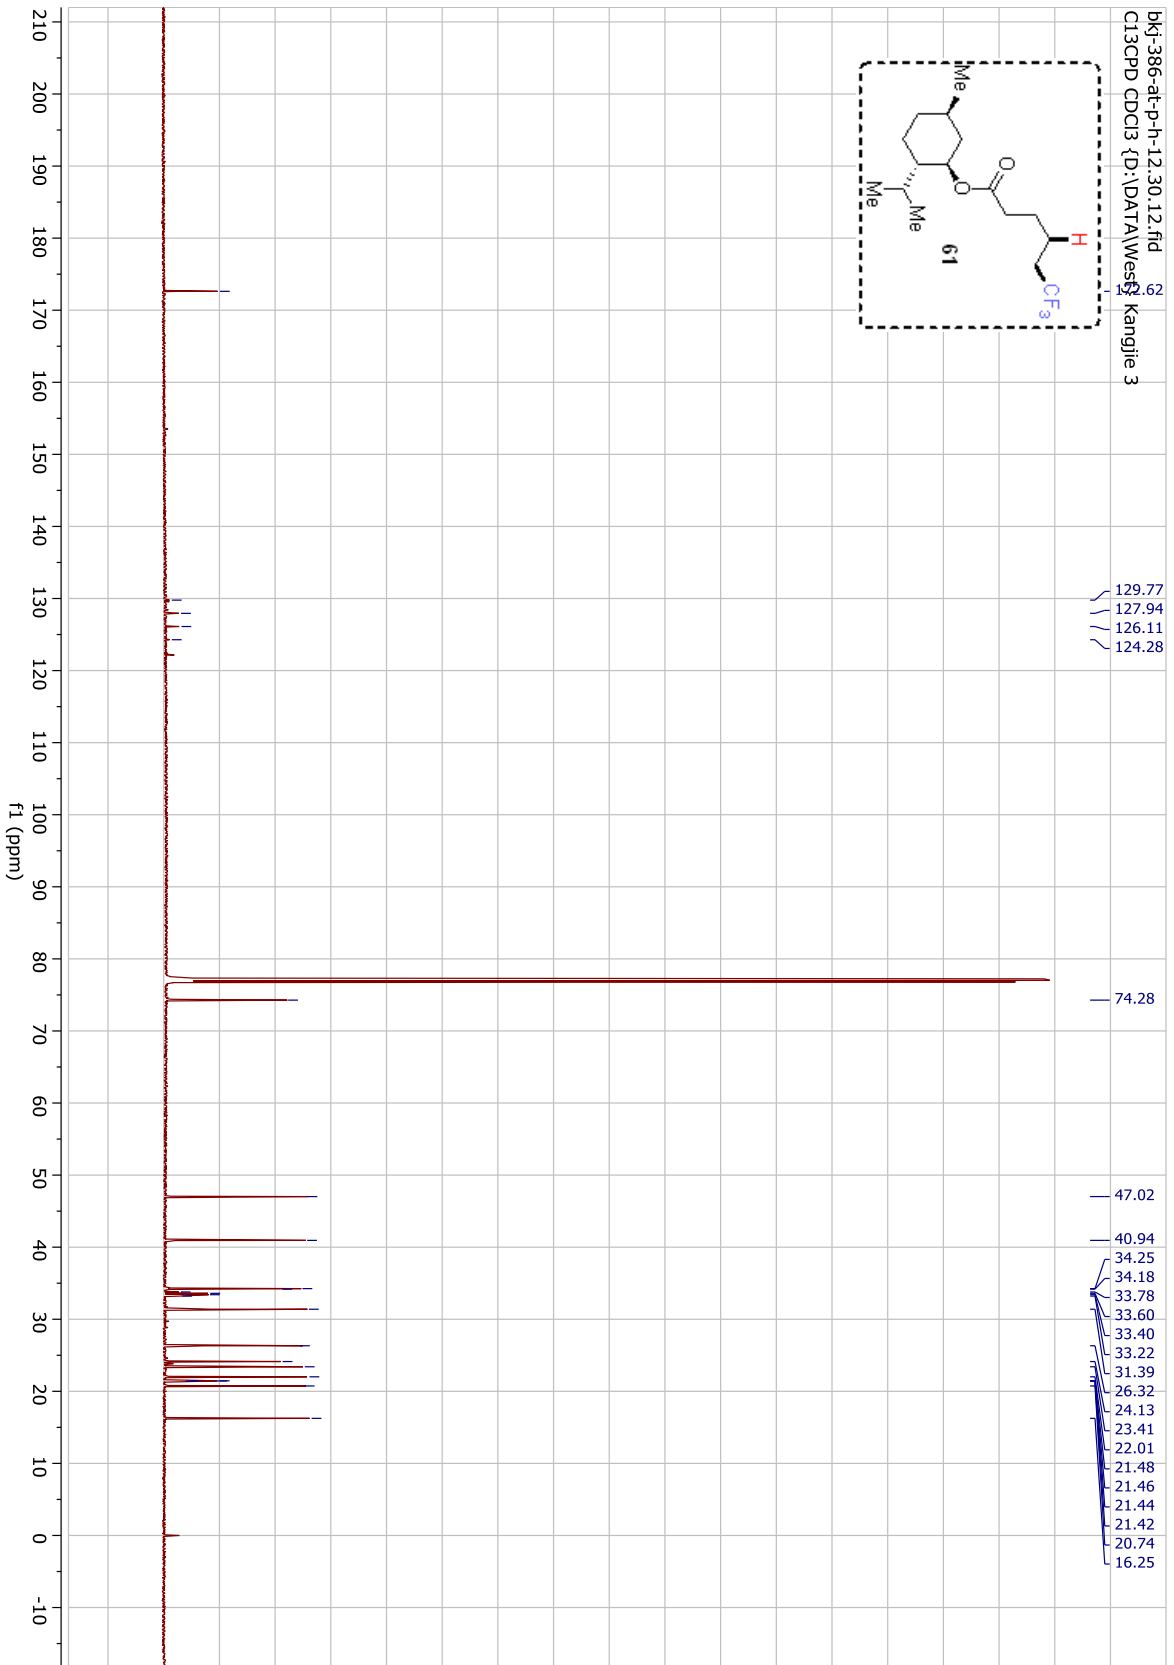

bkj-386-at-p-h-12.30.11.fid  
F19\_baseline\_correct ID  
F19\_baseline\_correct FID19 (DATA\West) Kangjie 3

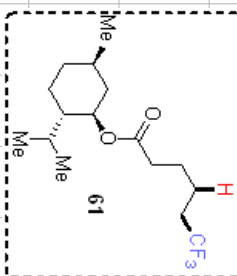

-66.41  
-66.43  
-66.45



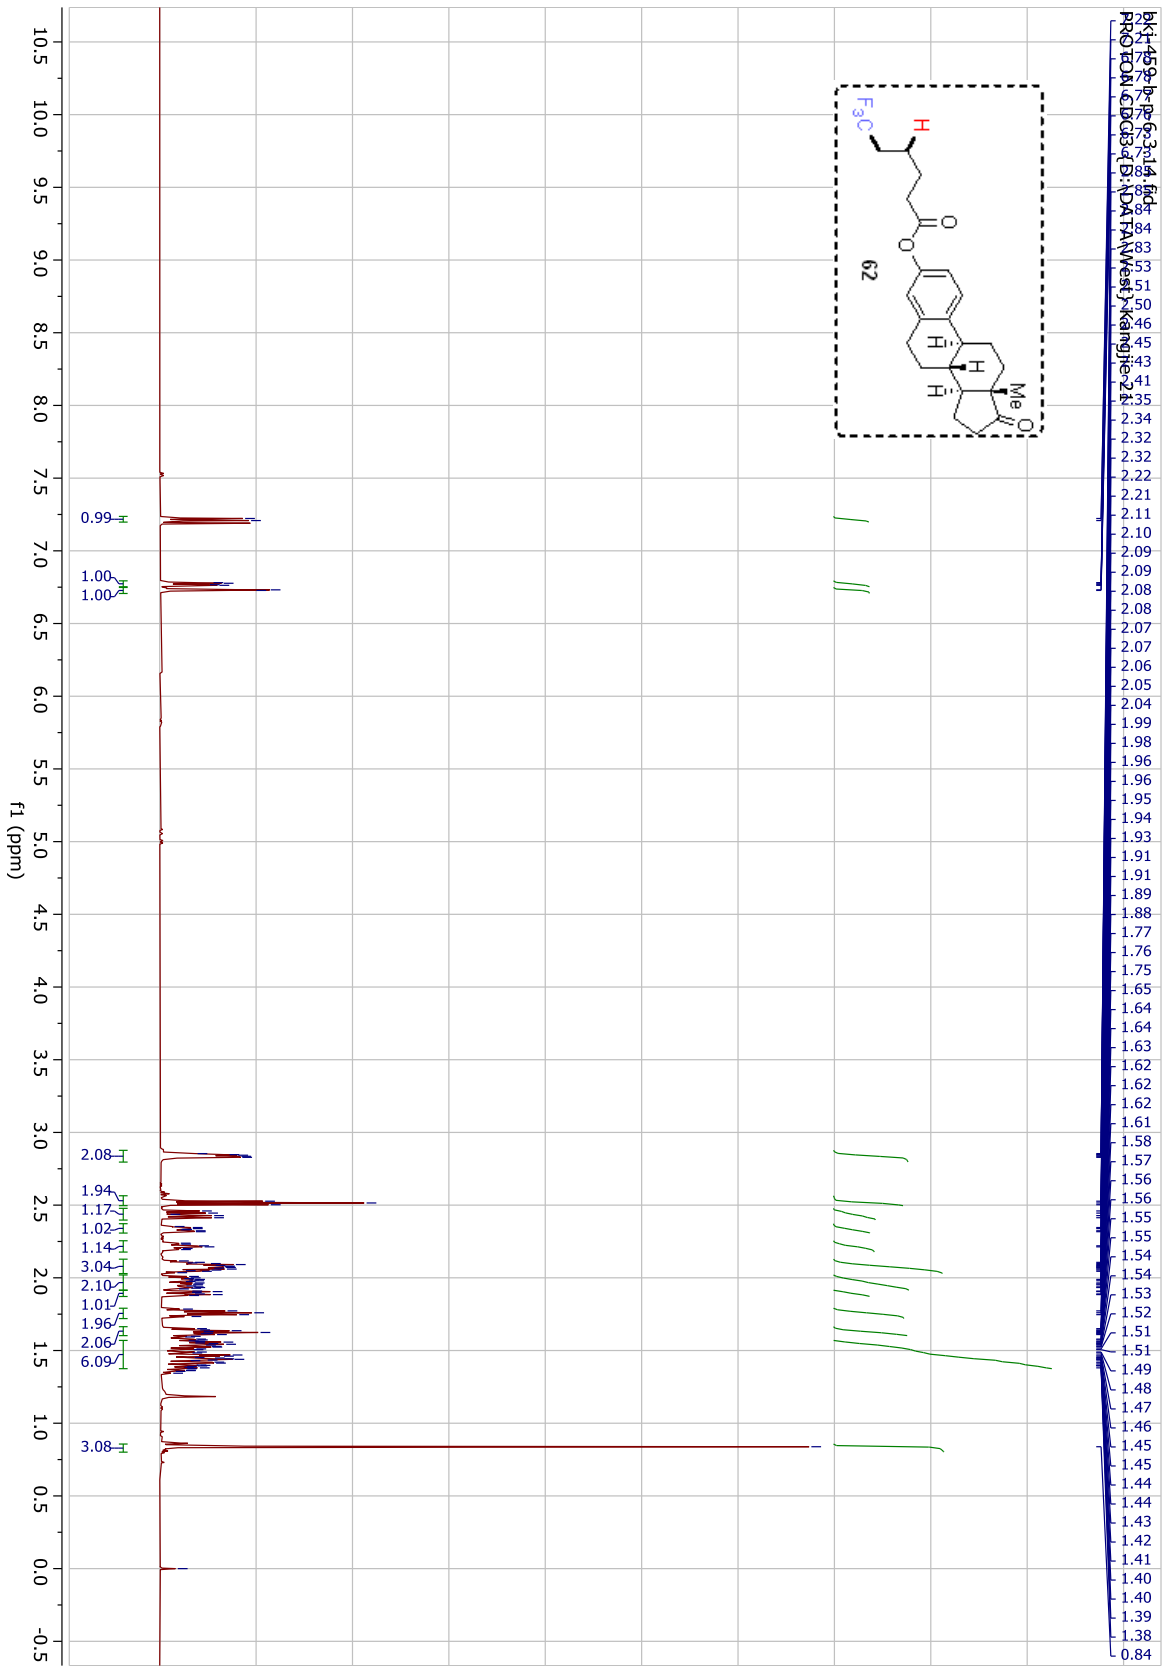

bkj-459-b-p-c-6-3-1.fid  
C13CPD.opt CDCl3 {E:\DATA\_Mest\ Kanjlie 8

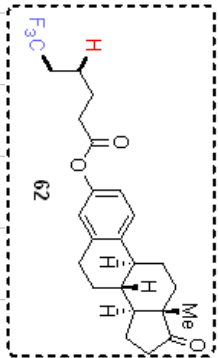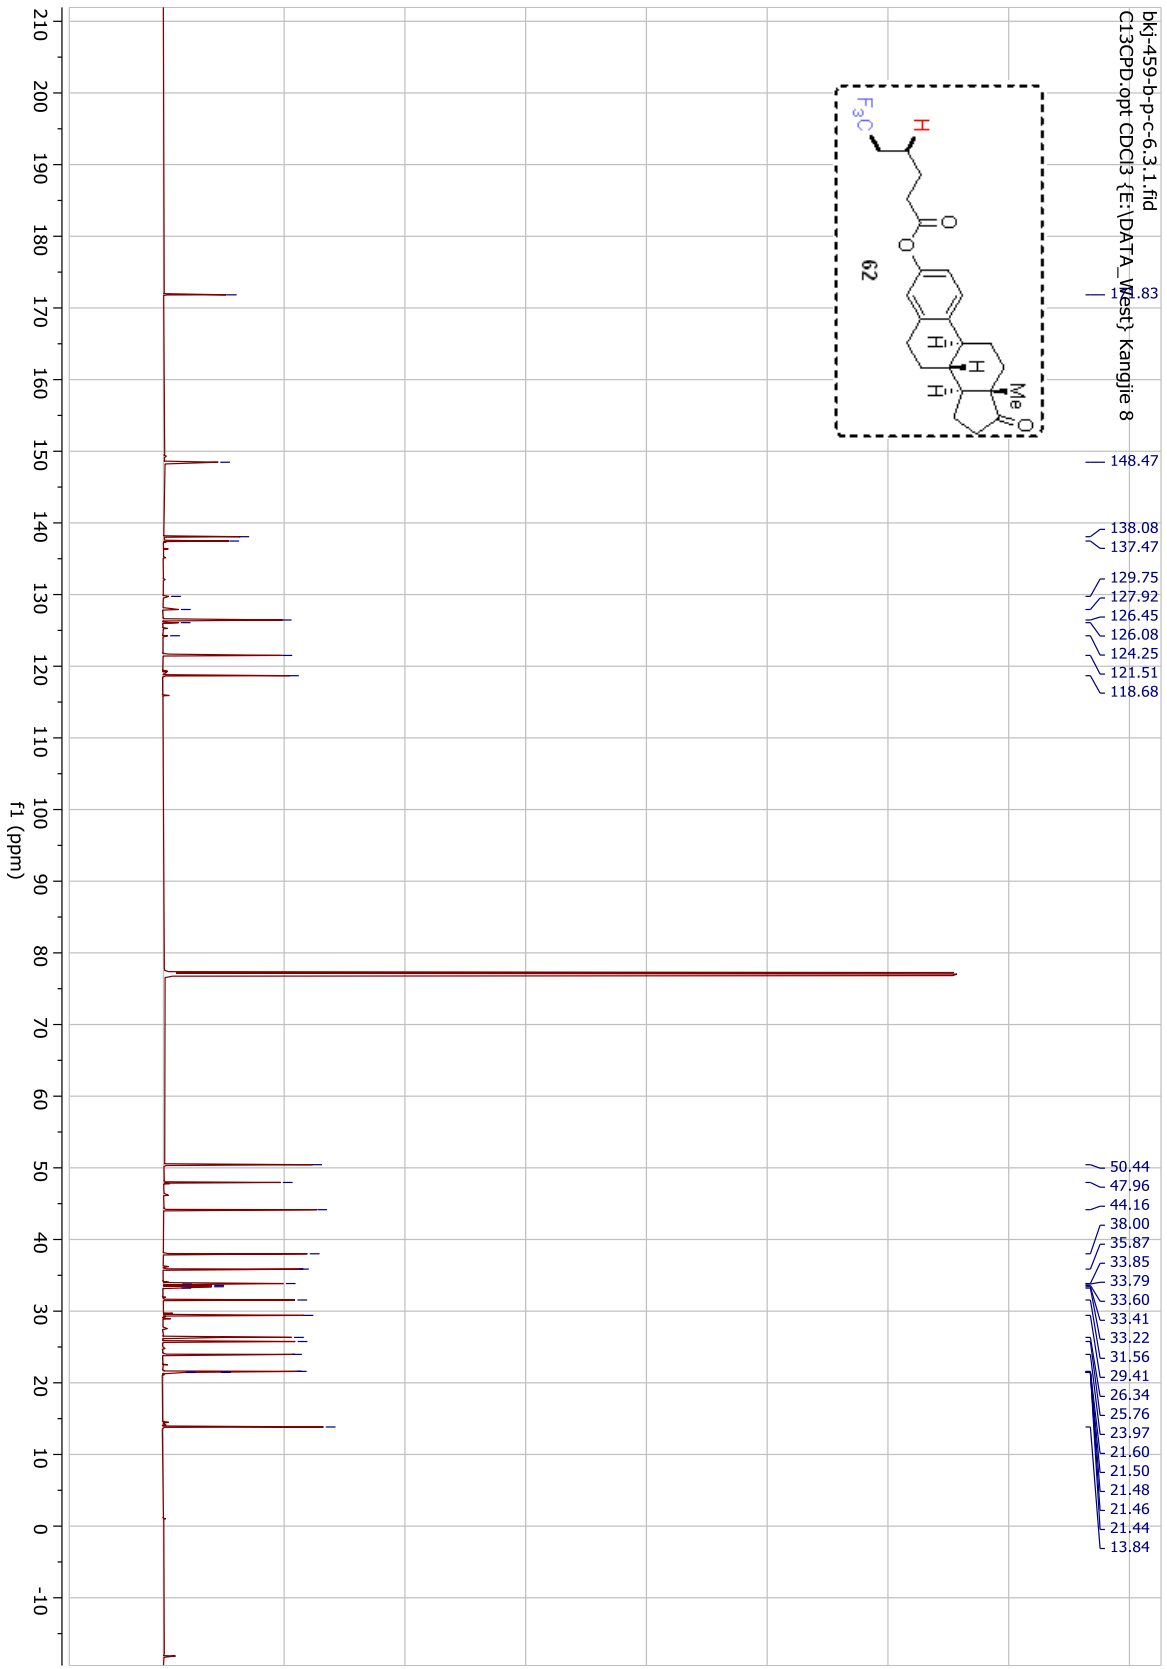

bkj-459-b-p-f-6.3.12.ftd  
F19

CMC\_F19 CDCl3 (D:\DATA\West) Kanjije 21

-66.30  
-66.32  
-66.34

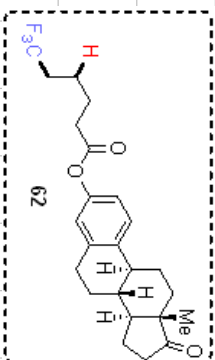

bk1-386-au"-p-h-1.2.10.fid  
PROTON CDCl3 {D:\DATA\West\ Kangjie 3

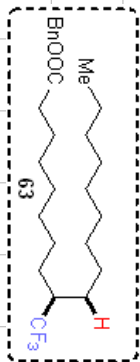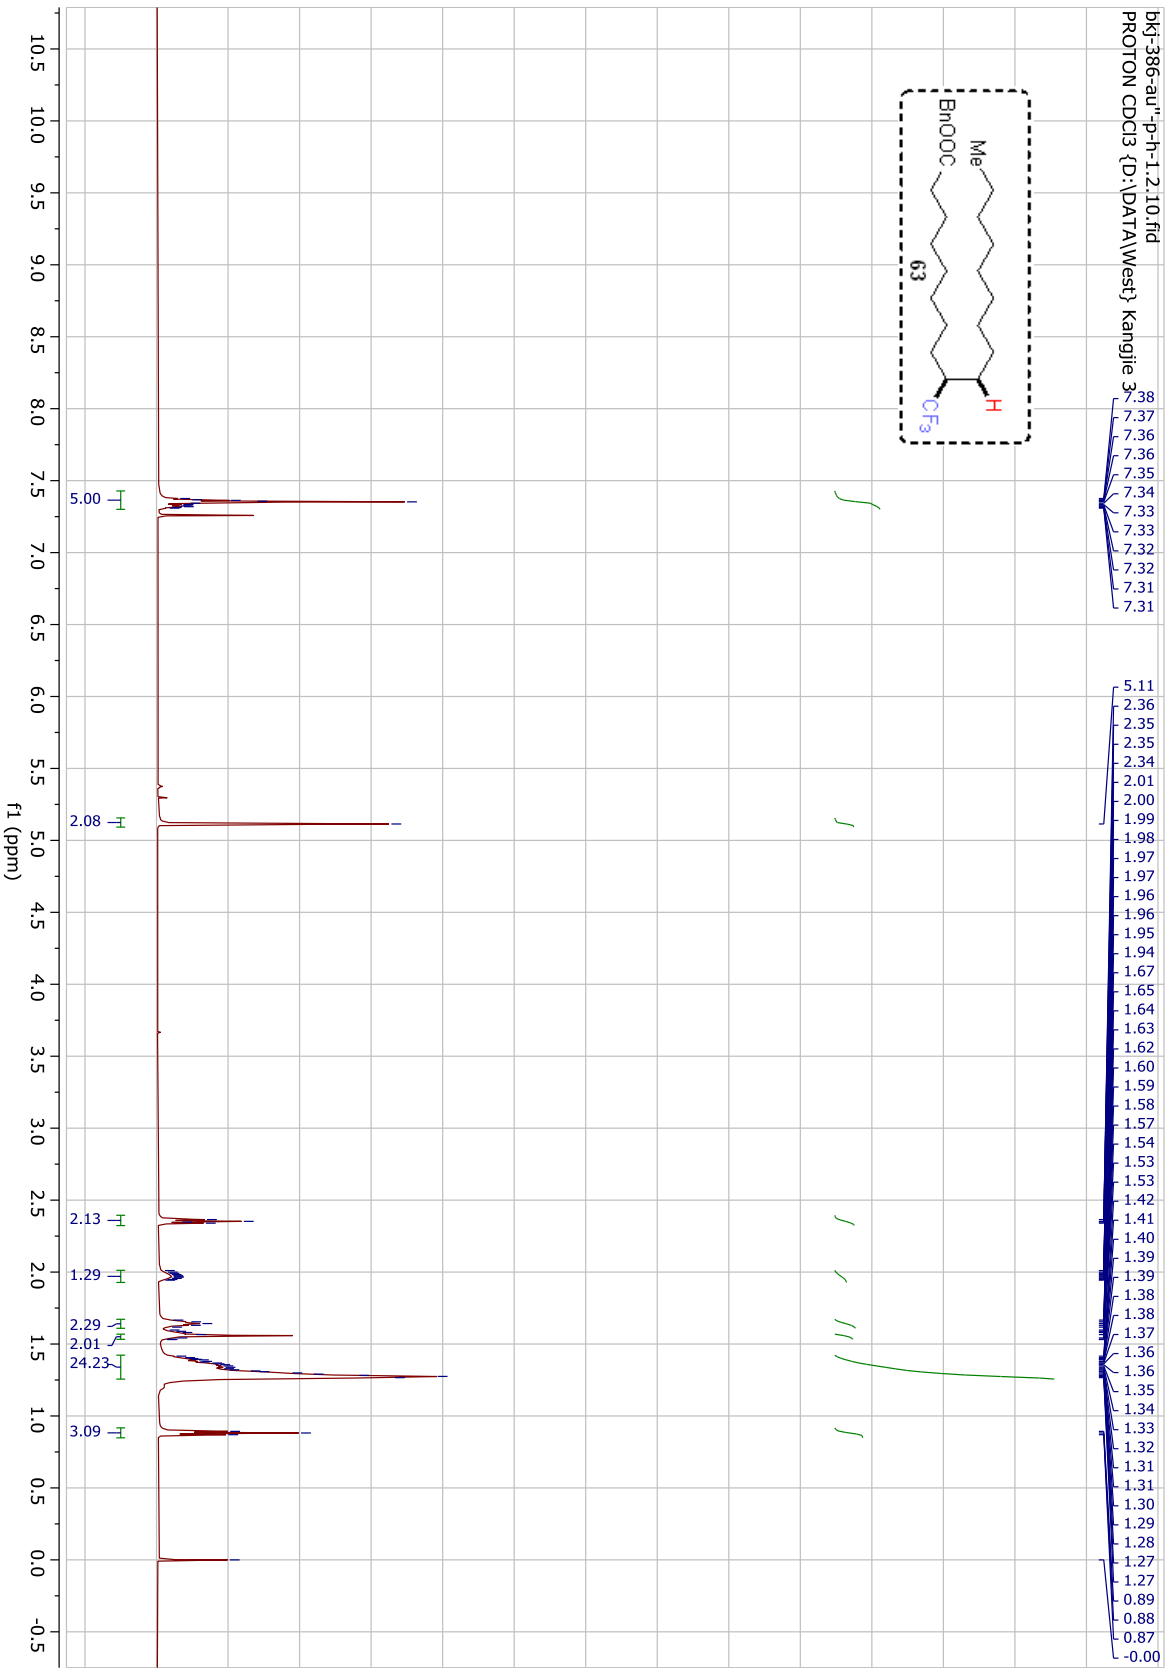

bjt-386-au"-p-h-1.2.11.fid  
C13CPD CDCl3 (D:\DATA\West) K20170116 3

89.64

136.14  
136.13  
131.57  
129.72  
128.55  
128.19  
127.87  
126.00

66.10  
66.08

42.81  
42.64  
42.48  
42.32

34.29  
31.89  
29.72  
29.55  
29.42  
29.30  
29.21  
29.18  
29.18  
29.08  
29.05  
29.03  
27.85  
27.84  
26.88  
24.93  
24.90  
22.68  
22.66  
14.11

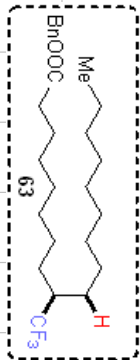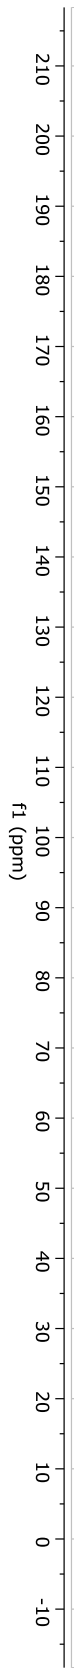



bkj-386-au"-p-h-1.2.12.fid  
F19\_baseline\_correct\_ID  
F19\_baseline\_correct CDC13 {D:\DATA\West} Kangjie 3

-70.12  
-70.12  
-70.13  
-70.14

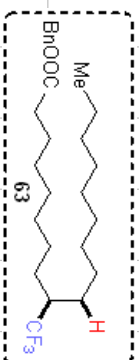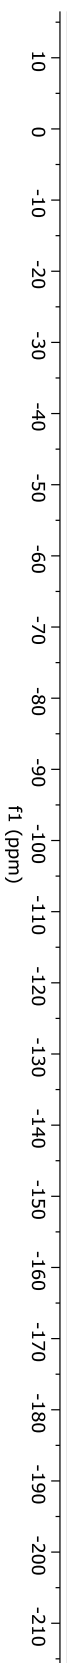

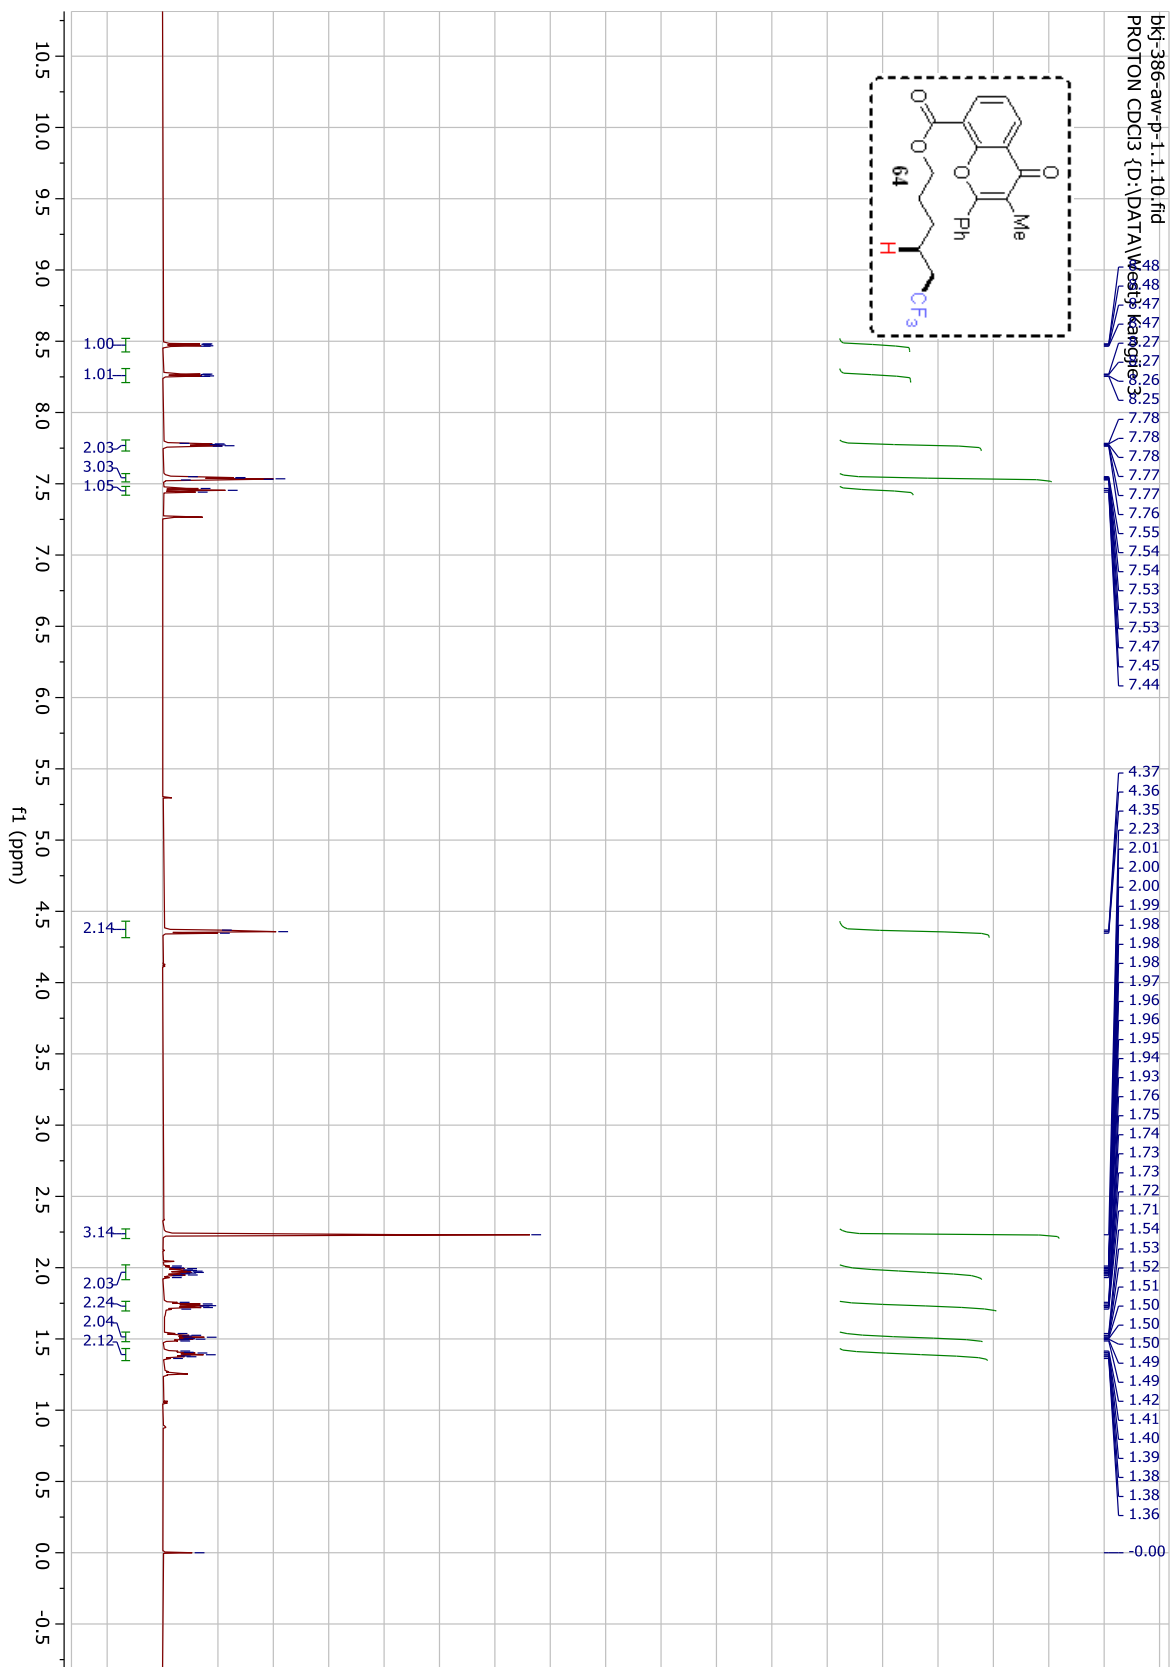

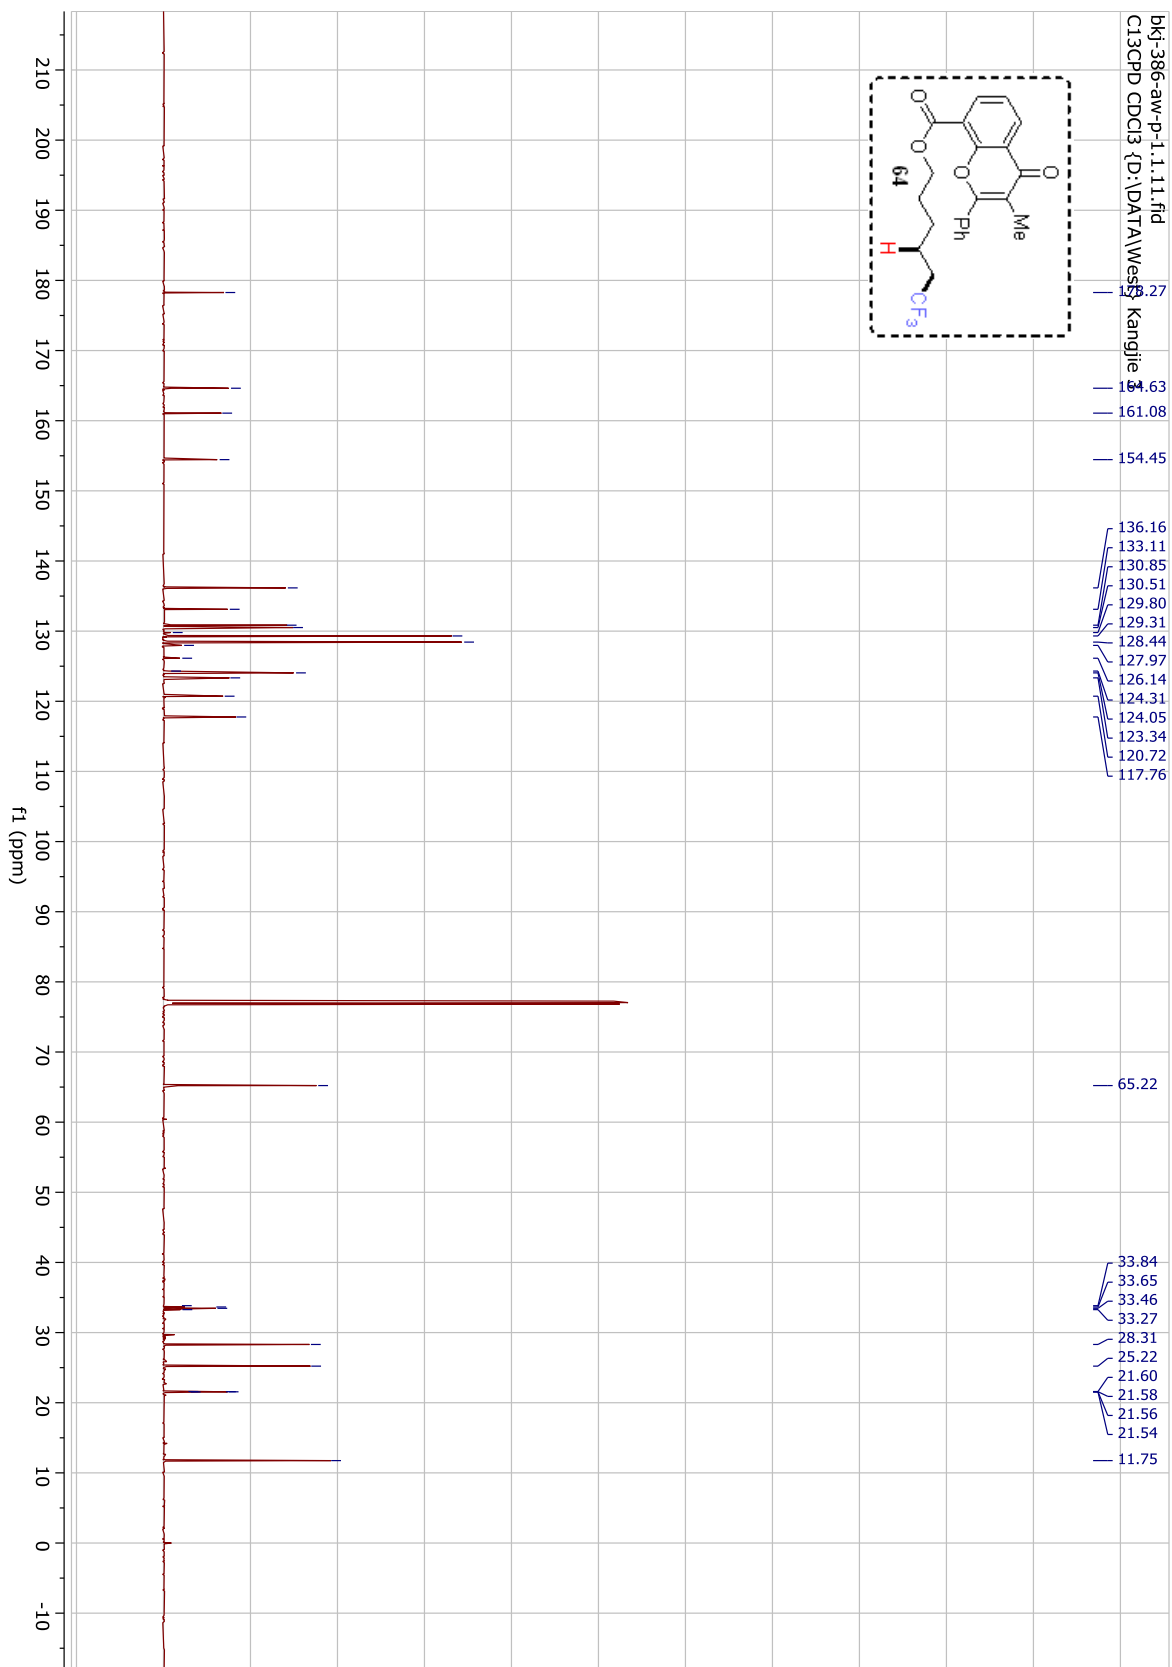

bkj-386-aw-p-1.1.12.fid  
F19\_baseline\_correct ID  
F19\_baseline\_correct CDCI3 {D:\DATA\West} Kangjie 3

-66.36  
-66.38  
-66.40

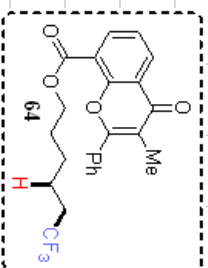





bkj-386-as-p-12.30.12.fid  
F19\_baseline\_correct 1D  
F19\_baseline\_correct CDC13 {D:\DATA\West} Kangjie 8

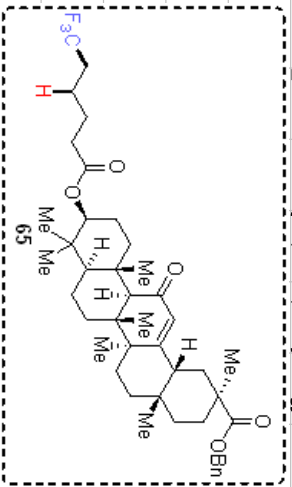

-66.34  
-66.36  
-66.38

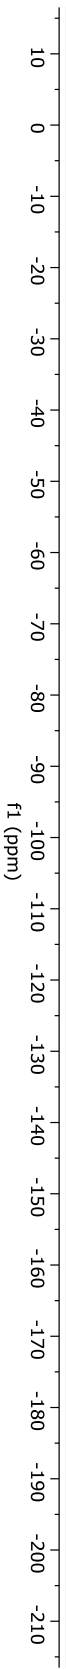





hkl-393-aa-p-c-1.7.11.fid  
C13CPD CDCl3 (D:\DATA\West) Sample 7

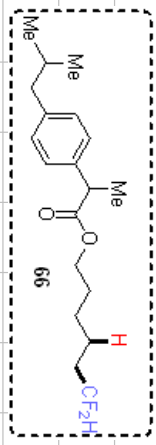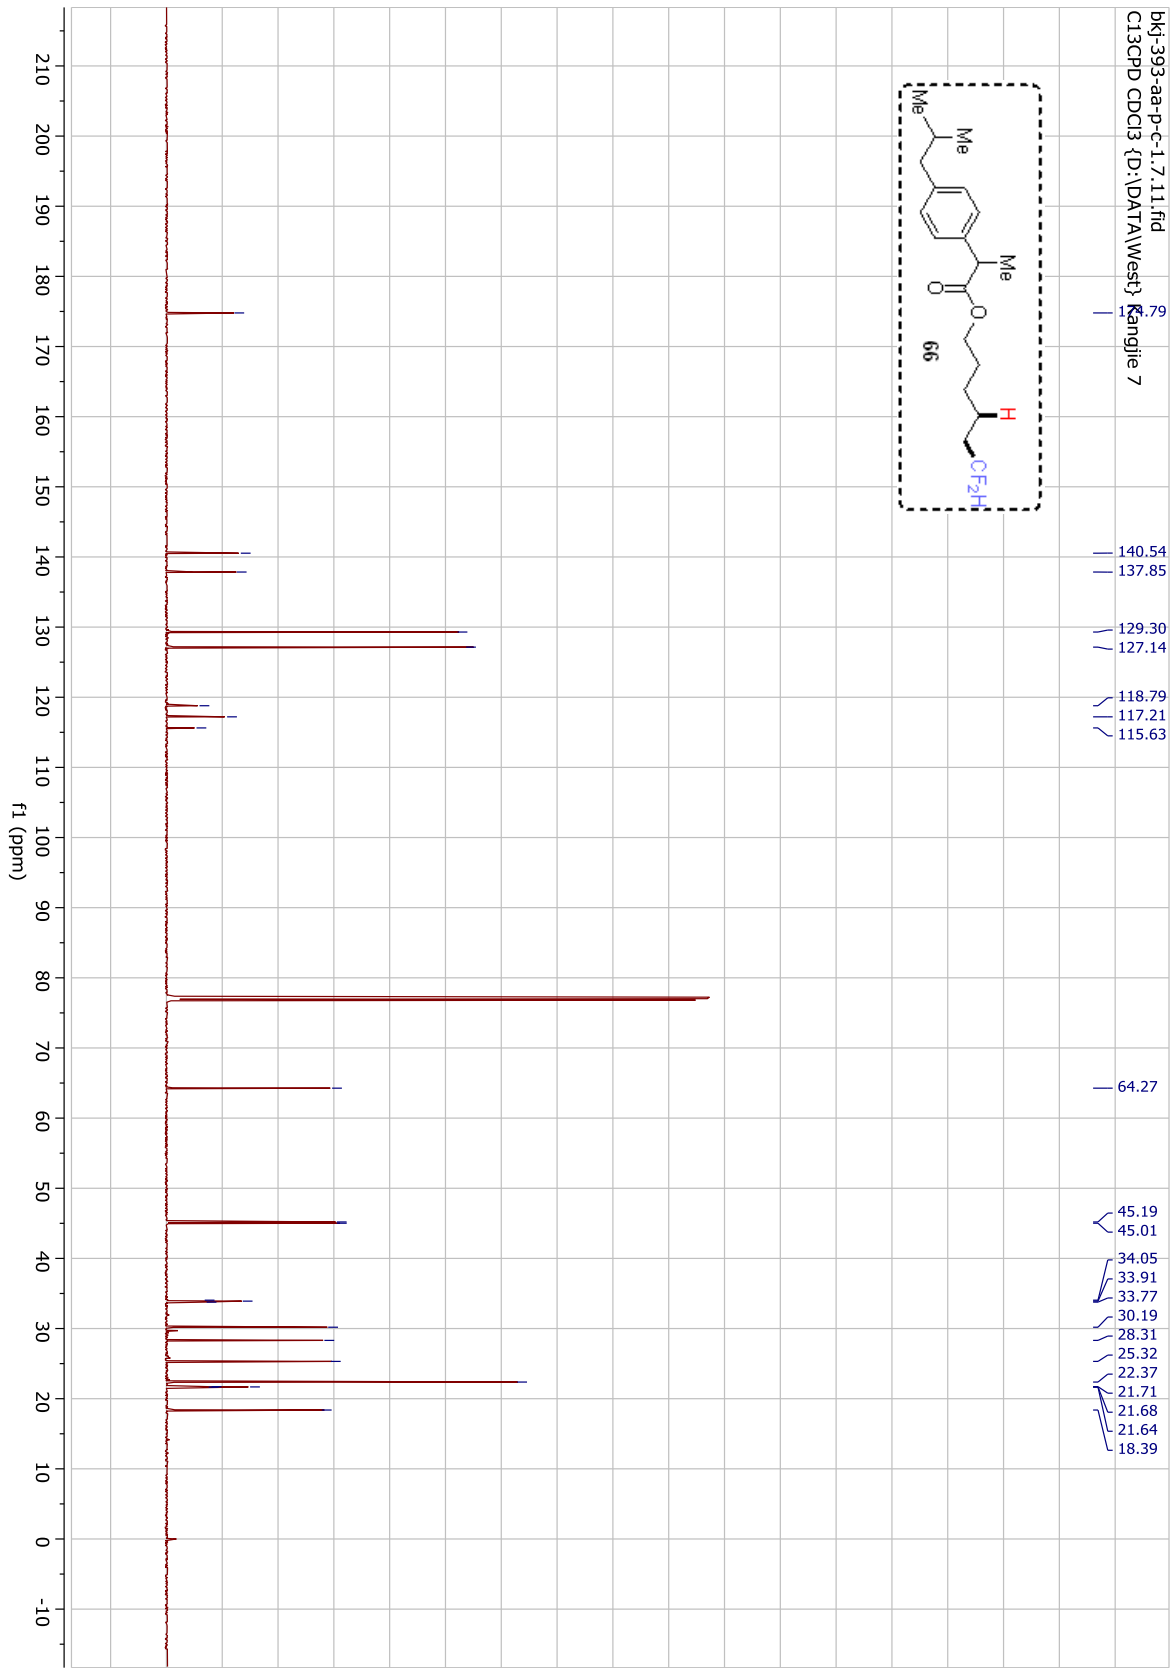

bkj-393-aa-p-h-1.7.11.fid  
F19\_baseline\_correct ID  
F19\_baseline\_correct CDC13 {D:\DATA\West} Kangjie 7

-115.78  
-115.81  
-115.84  
-115.88  
-115.91  
-115.94

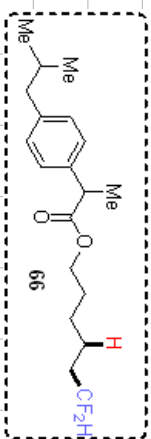

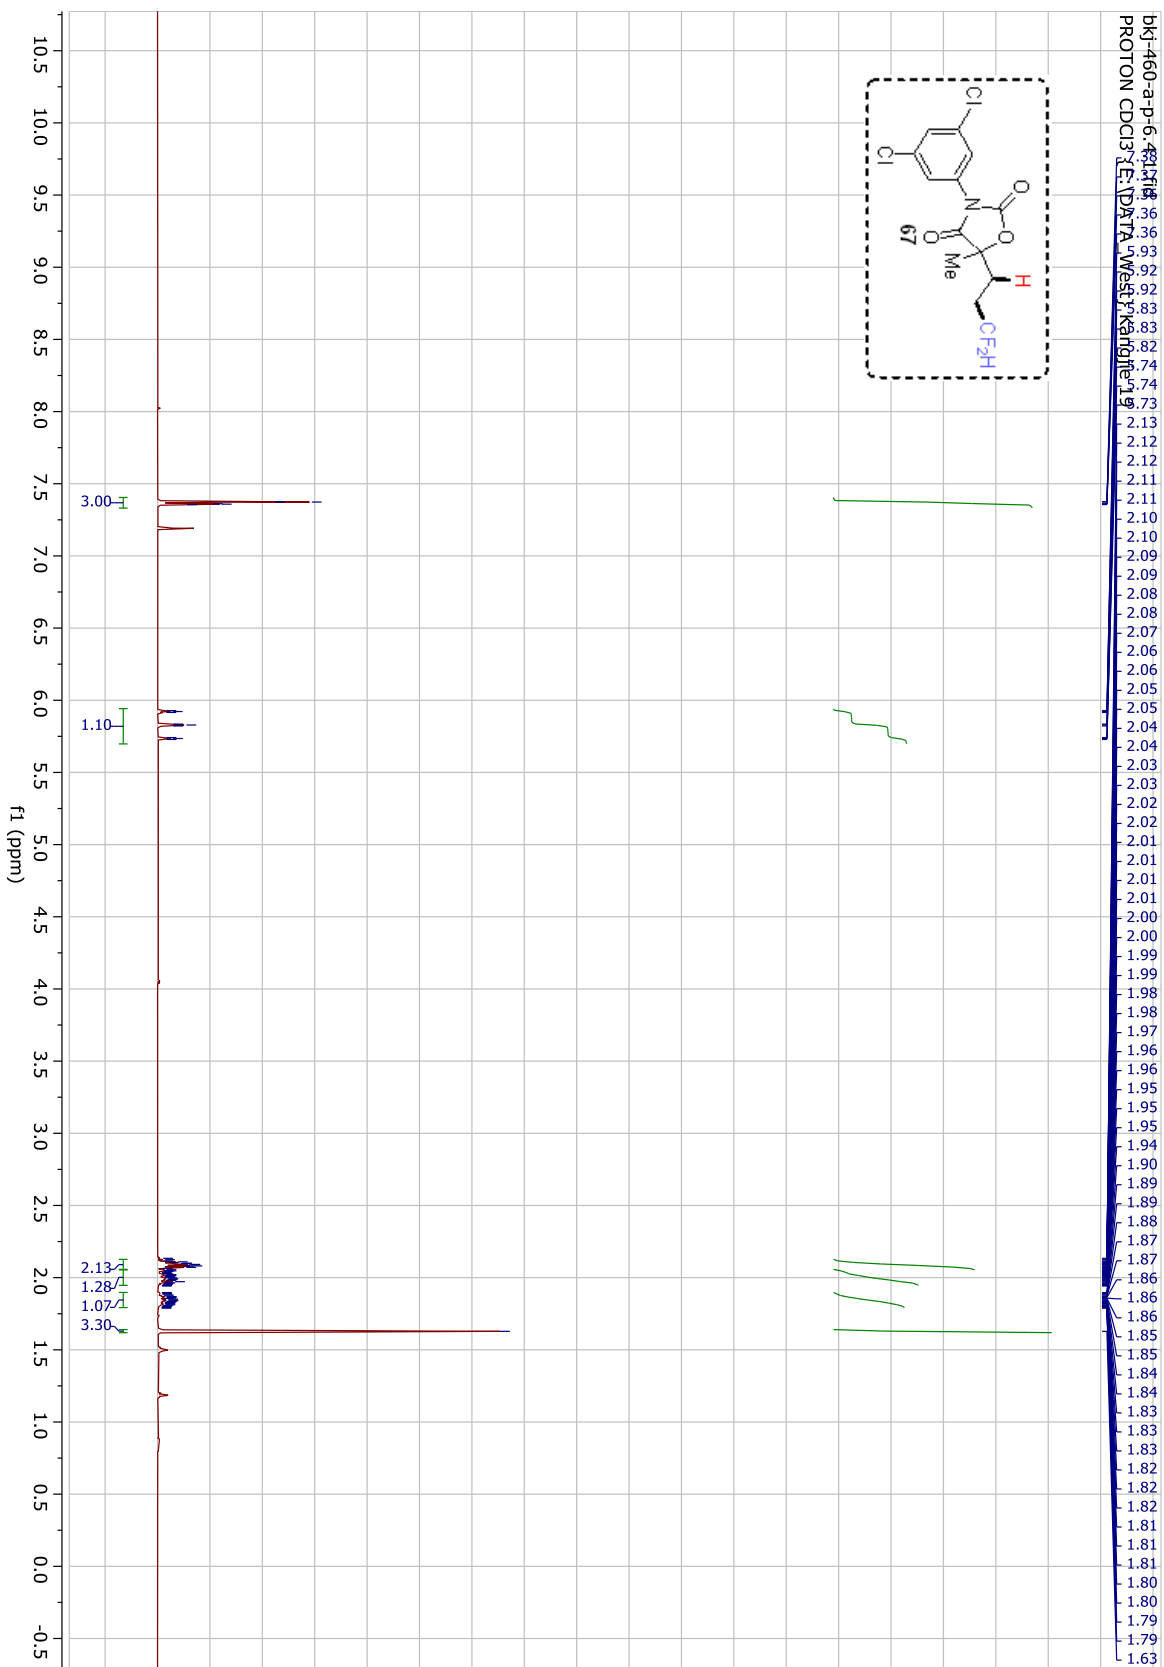

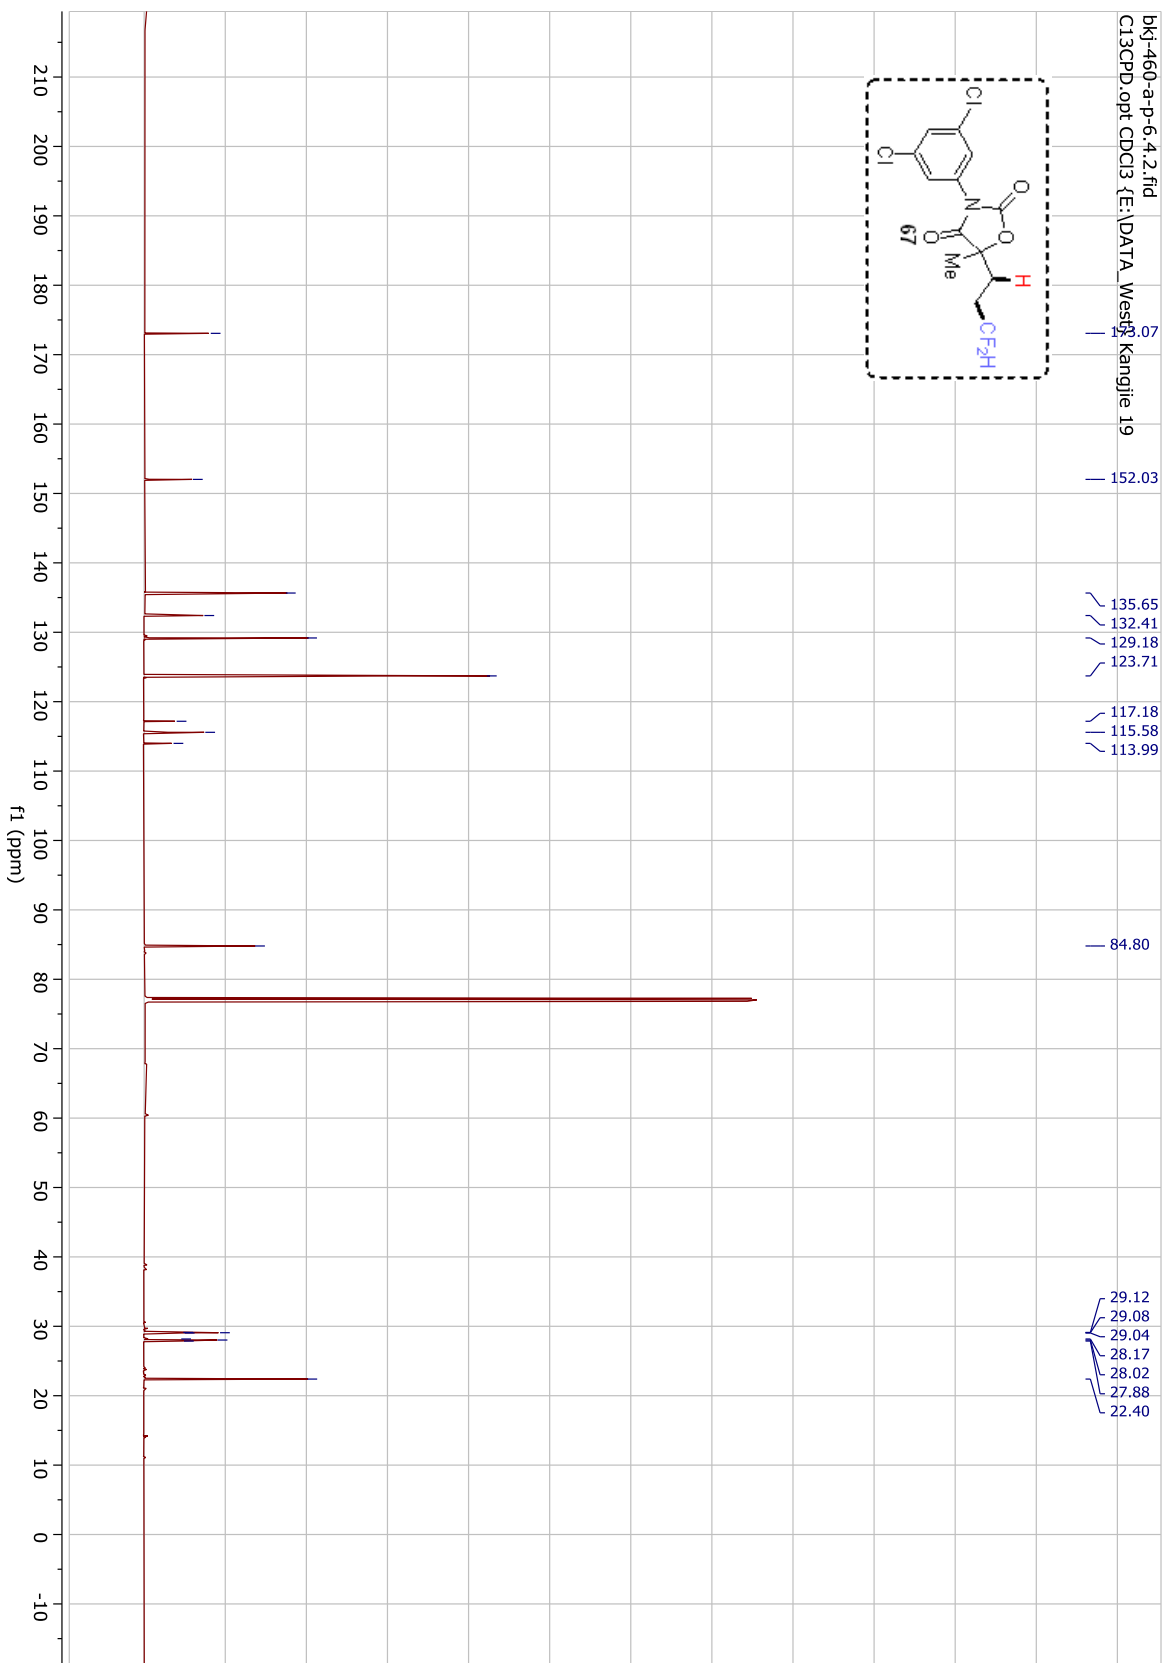

bkj-460-a-p-f-6.5.10.fid  
F19

CMC\_F19 CDCl3 (D:\DATA\West) Kangjie 22

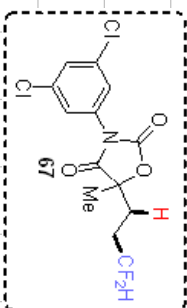

-116.79  
-116.82  
-116.85  
-116.89  
-116.92  
-116.95





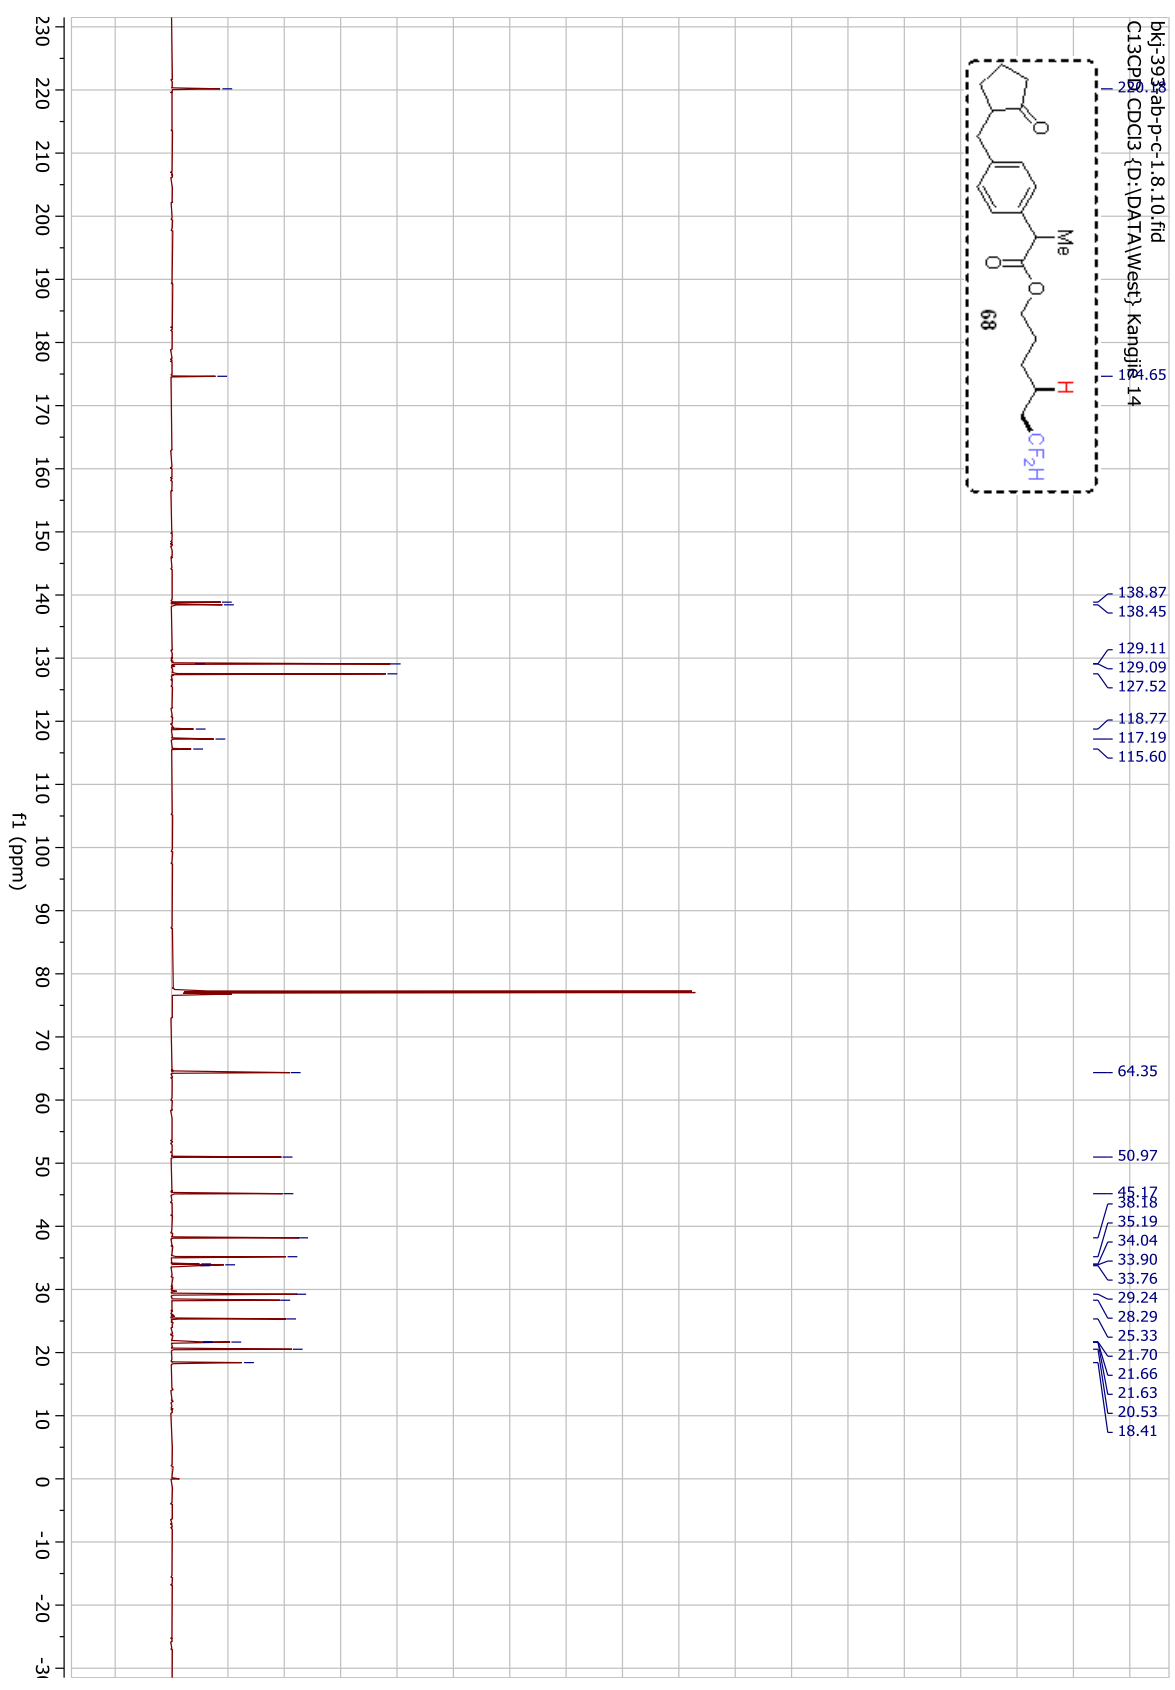

bkj-393-ab-pl-h-1.7.11.ftd  
F19\_baseline\_correct ID  
F19\_baseline\_correct CDC13 {D:\DATA\West\ Kangjie 8

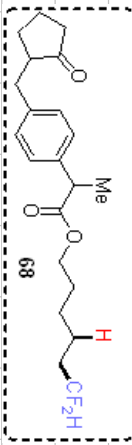

-115.77  
-115.81  
-115.84  
-115.88  
-115.91  
-115.94







bkt-393-ah-p-c-1.12.10.fid  
C13CPD CDCl3 (D:\DATA\Westj k\u00e4ngj\u00e4le 19

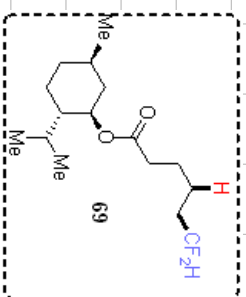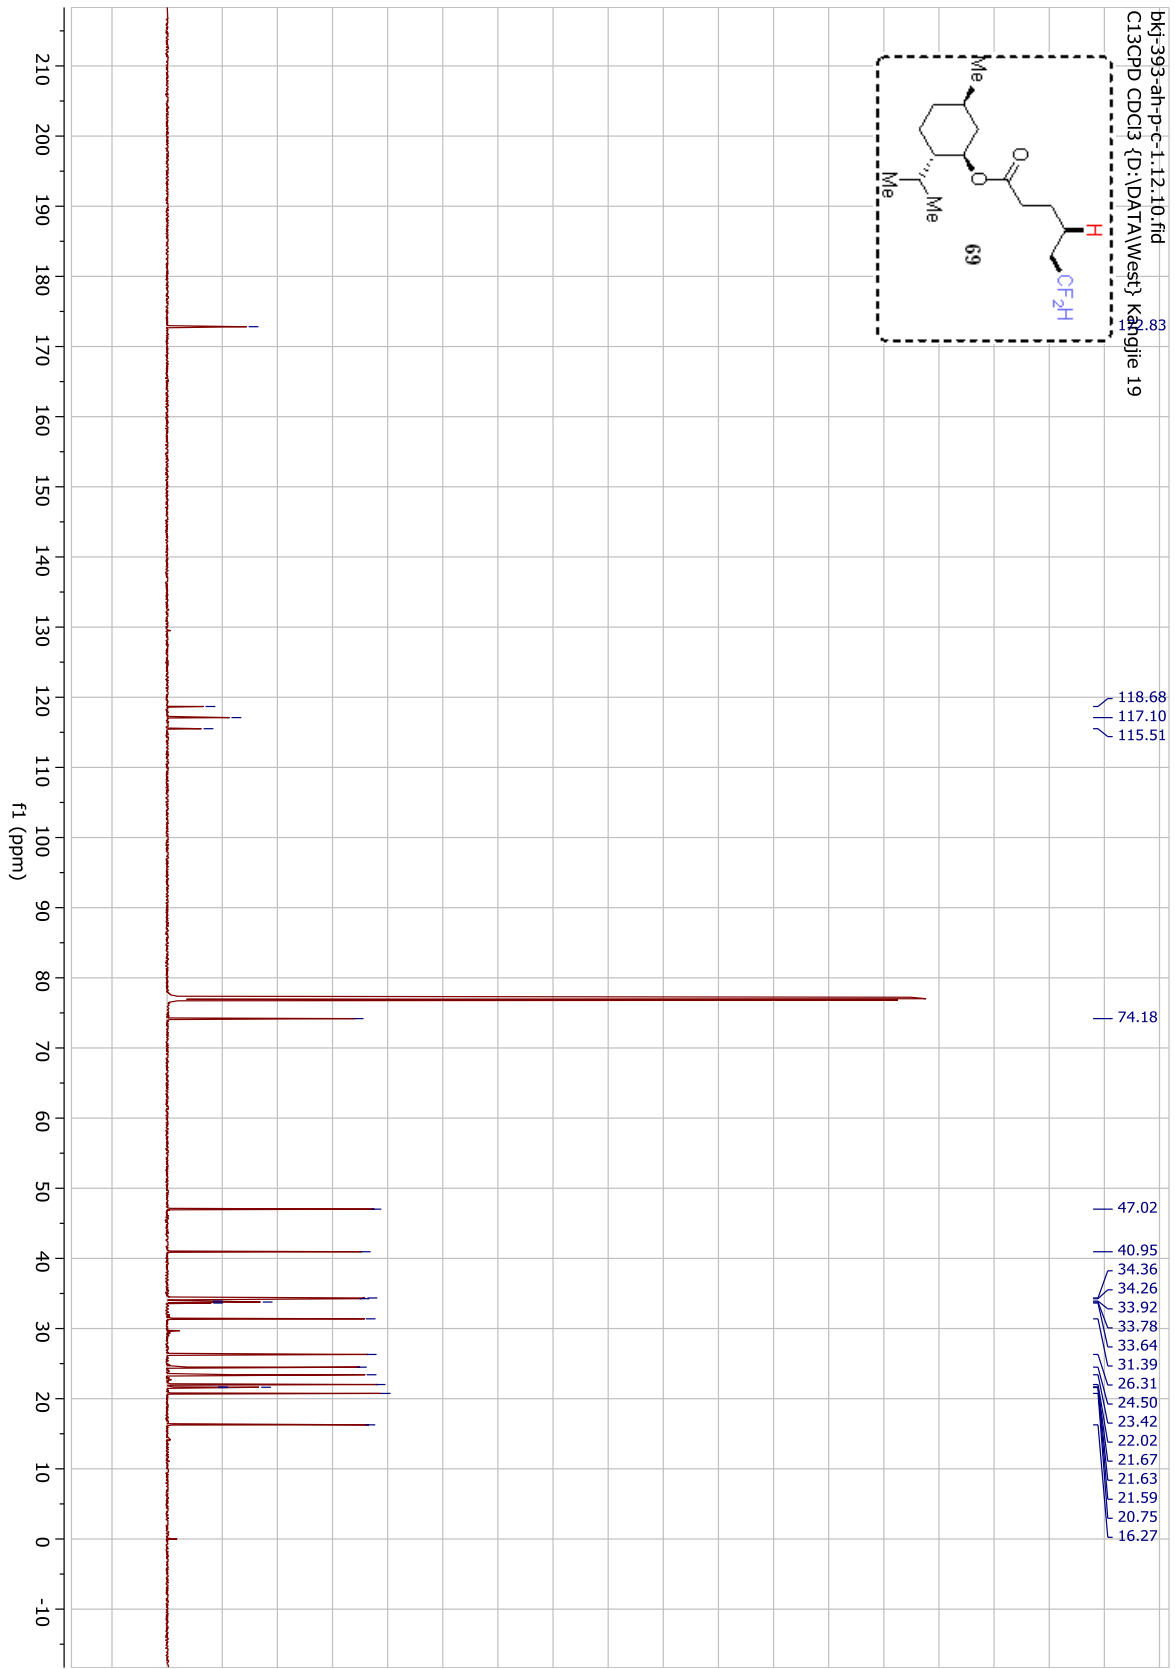

bkj-393-ah-p-f-1.11.10.fid  
F19\_baseline\_correct ID  
F19\_

AWestf Kangjie 19

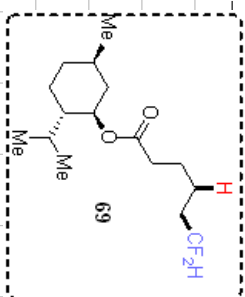

-115.88  
-115.91  
-115.94  
-115.98  
-116.01  
-116.04

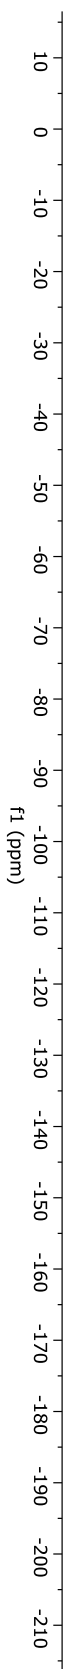

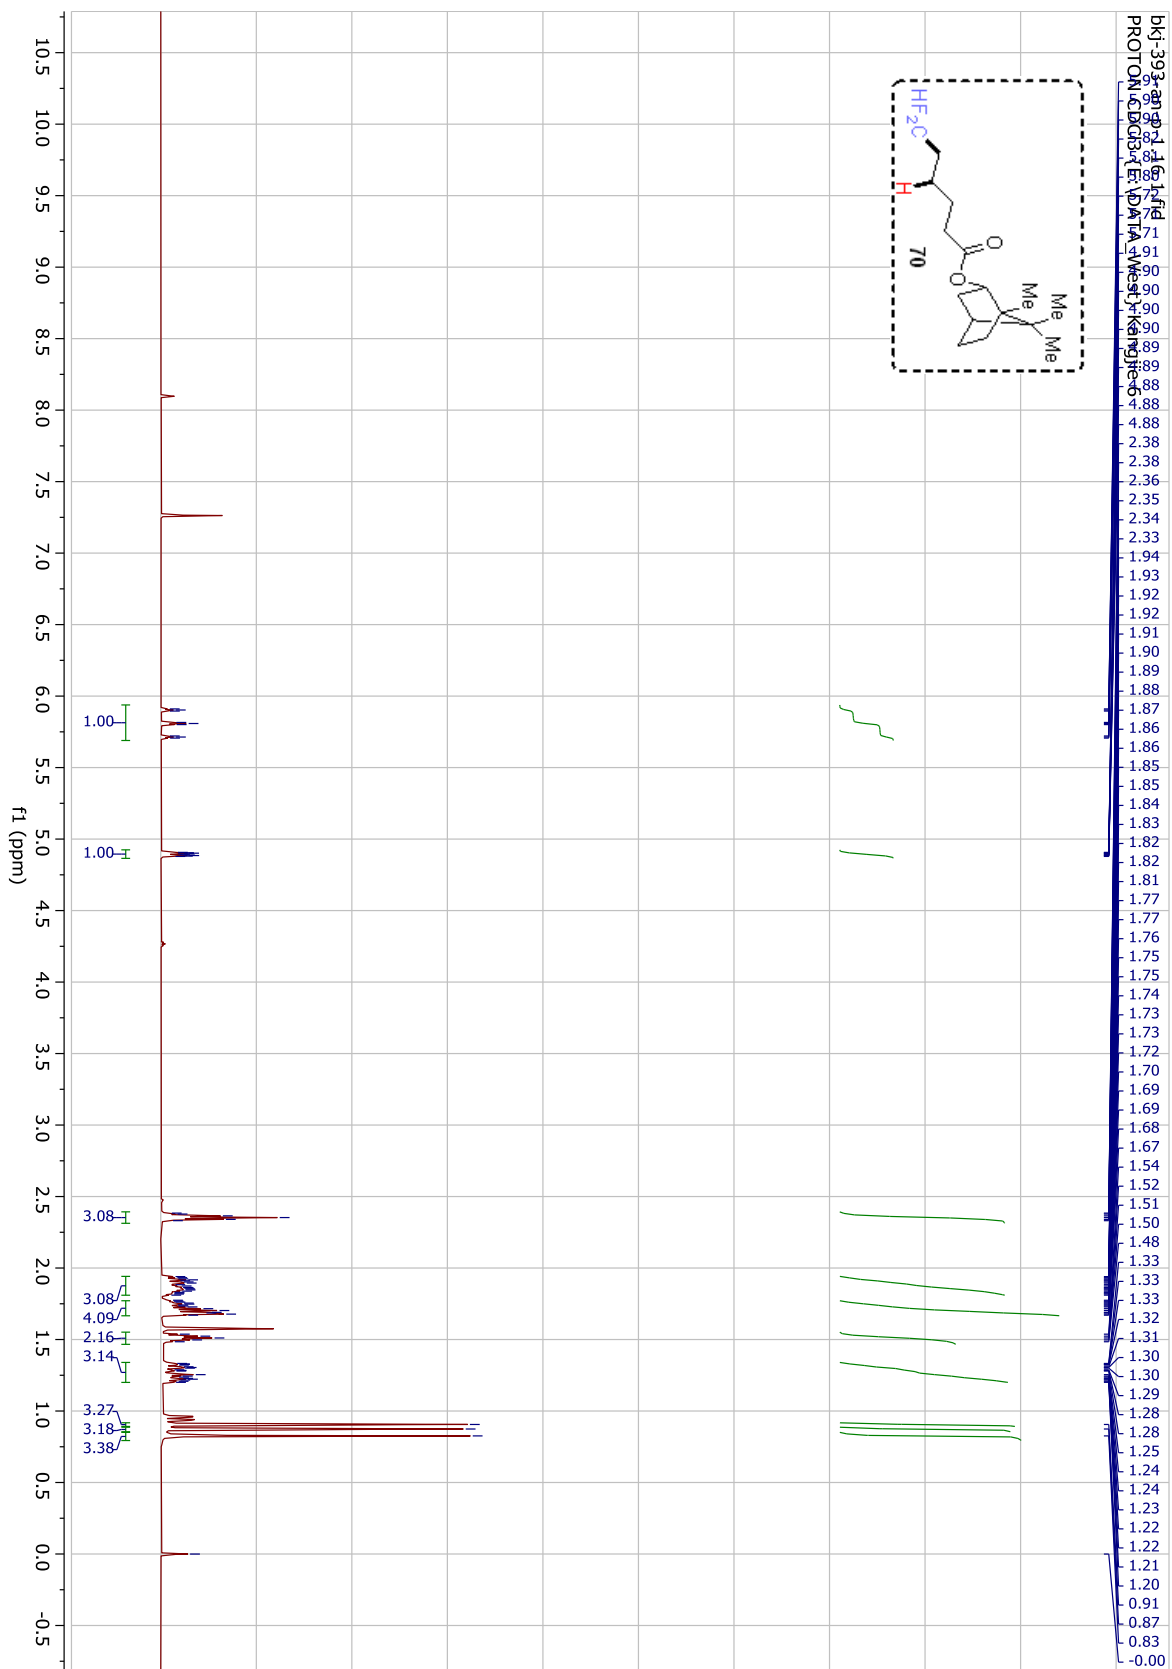

bkt-393-an-p-1.16.2.fid  
C13CPD CDCl3 (E:\DATA\_West\Kangjie 6

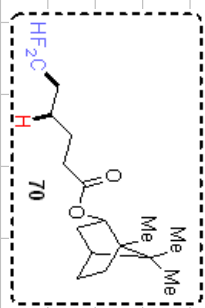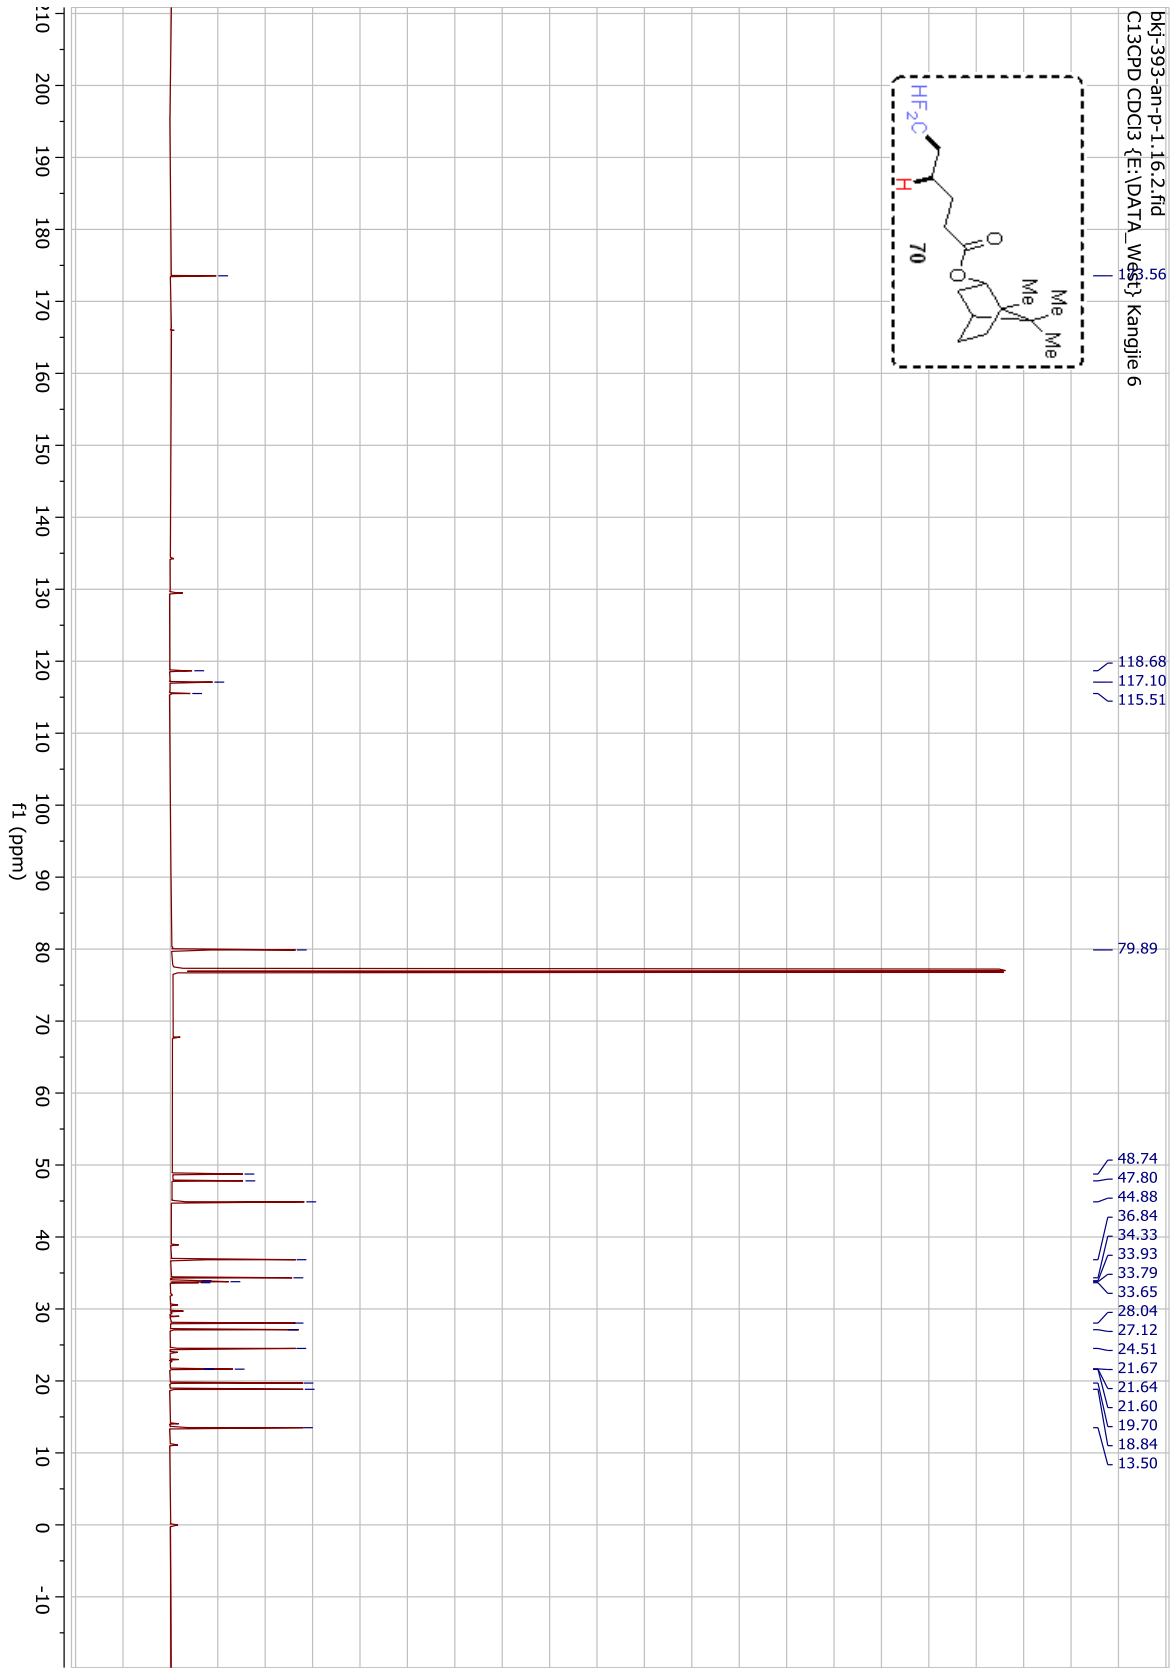

bkj-393-an-p-f-1.19.10.fid  
F19\_baseline\_correct ID  
F19\_baseline\_correct CDC13 {D:\DATA\West\ Kangjie 5

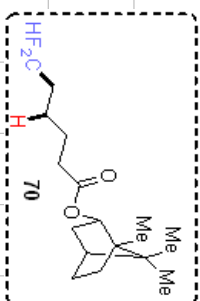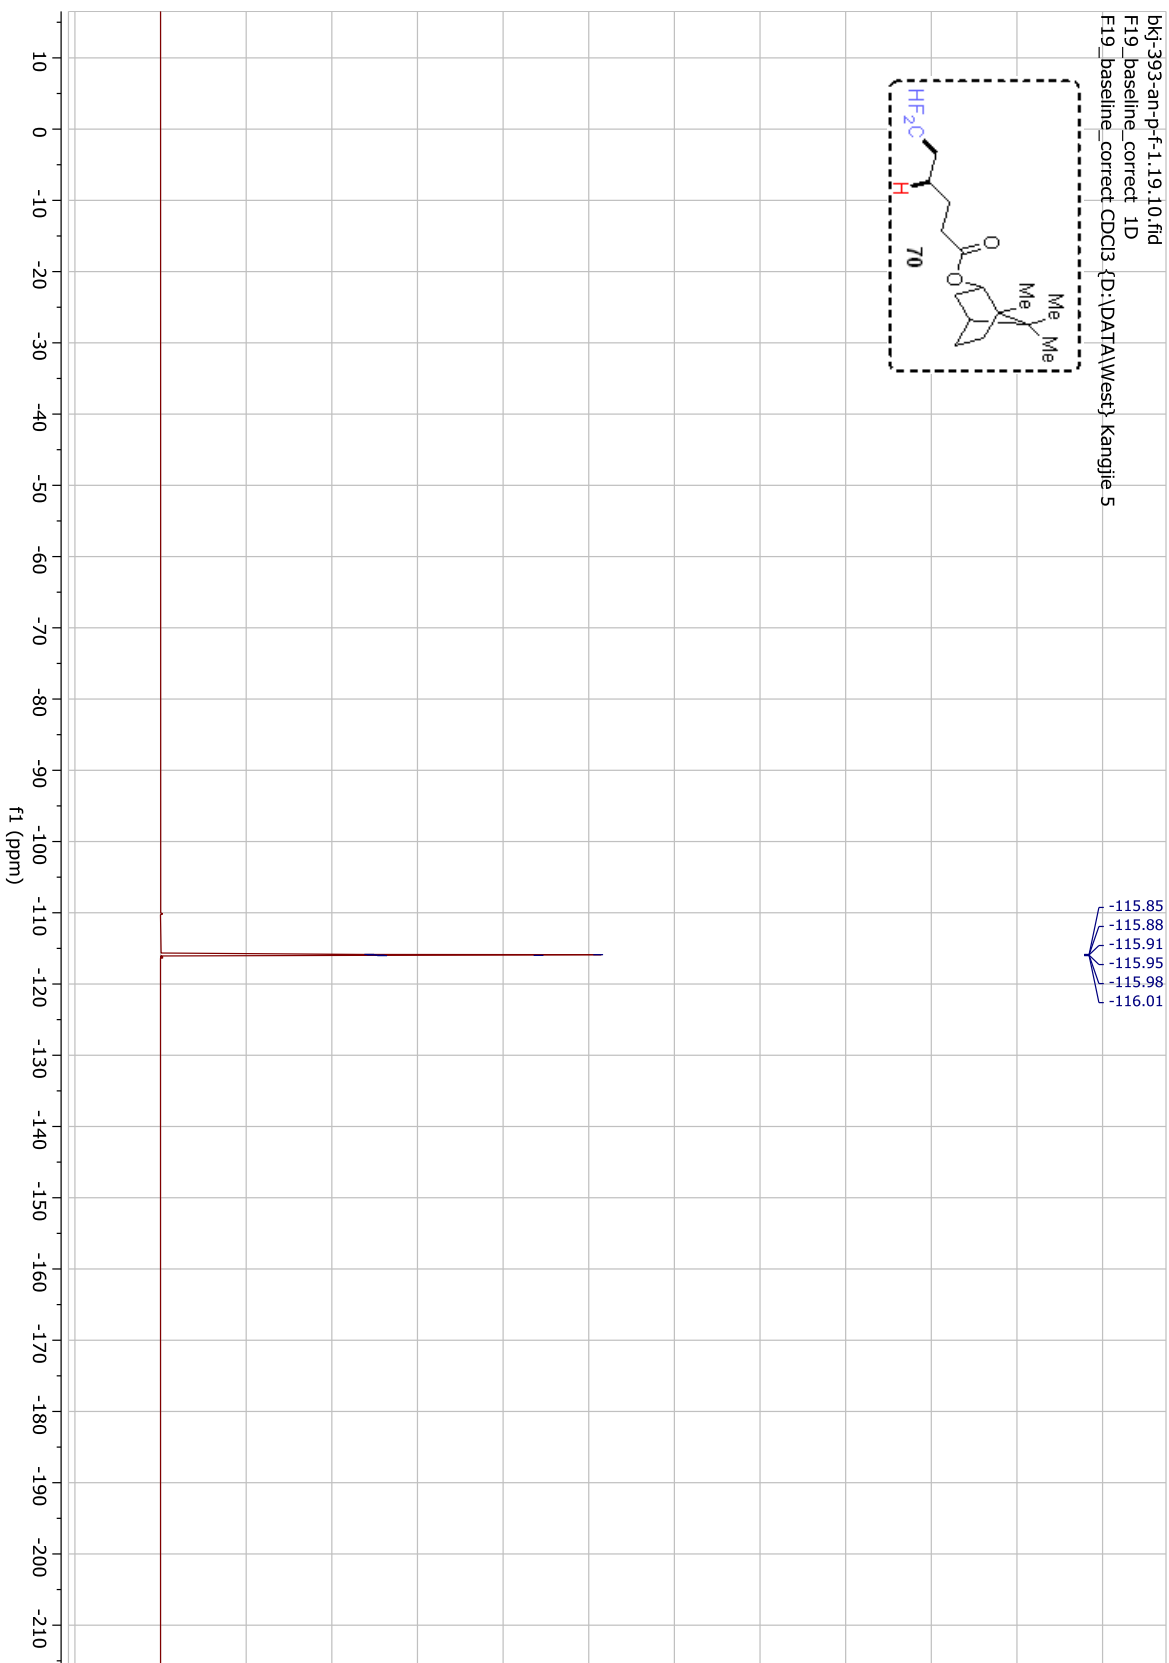



bkj-393-ai-p-c-1.17.10.fid  
C13CPD CDCl3 (D:\DATA\Westj\_Karjulle 7

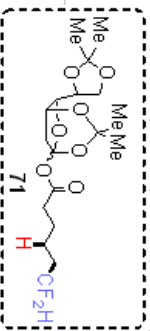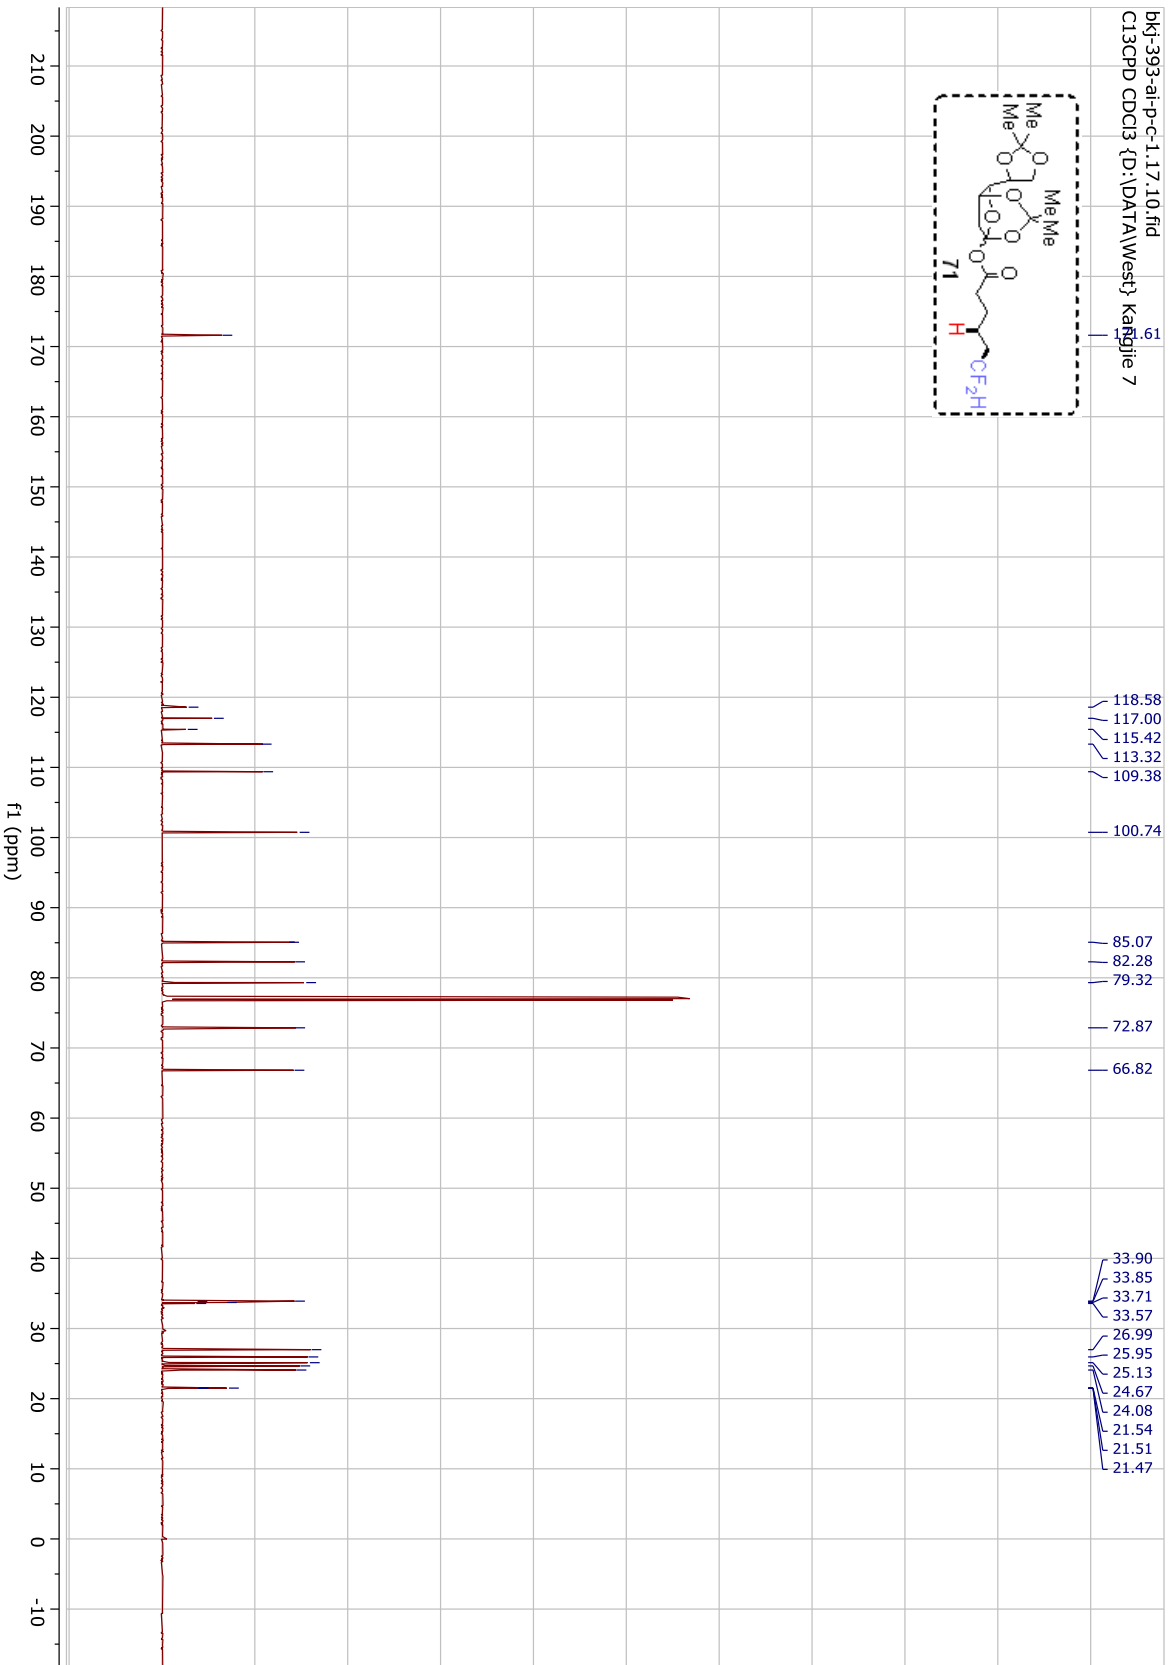



bkj-393-ai-p-f-1.18.1.fid  
F19 CDCl3 {D:\DATA\West}\Kangjie 16

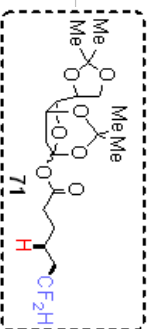

-115.93  
-115.96  
-115.99  
-116.03  
-116.03  
-116.06  
-116.09

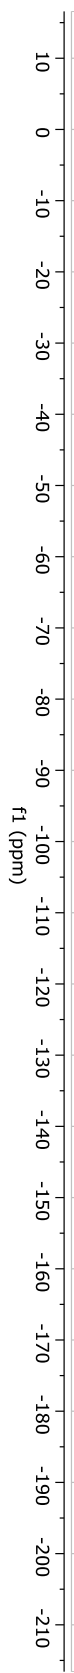

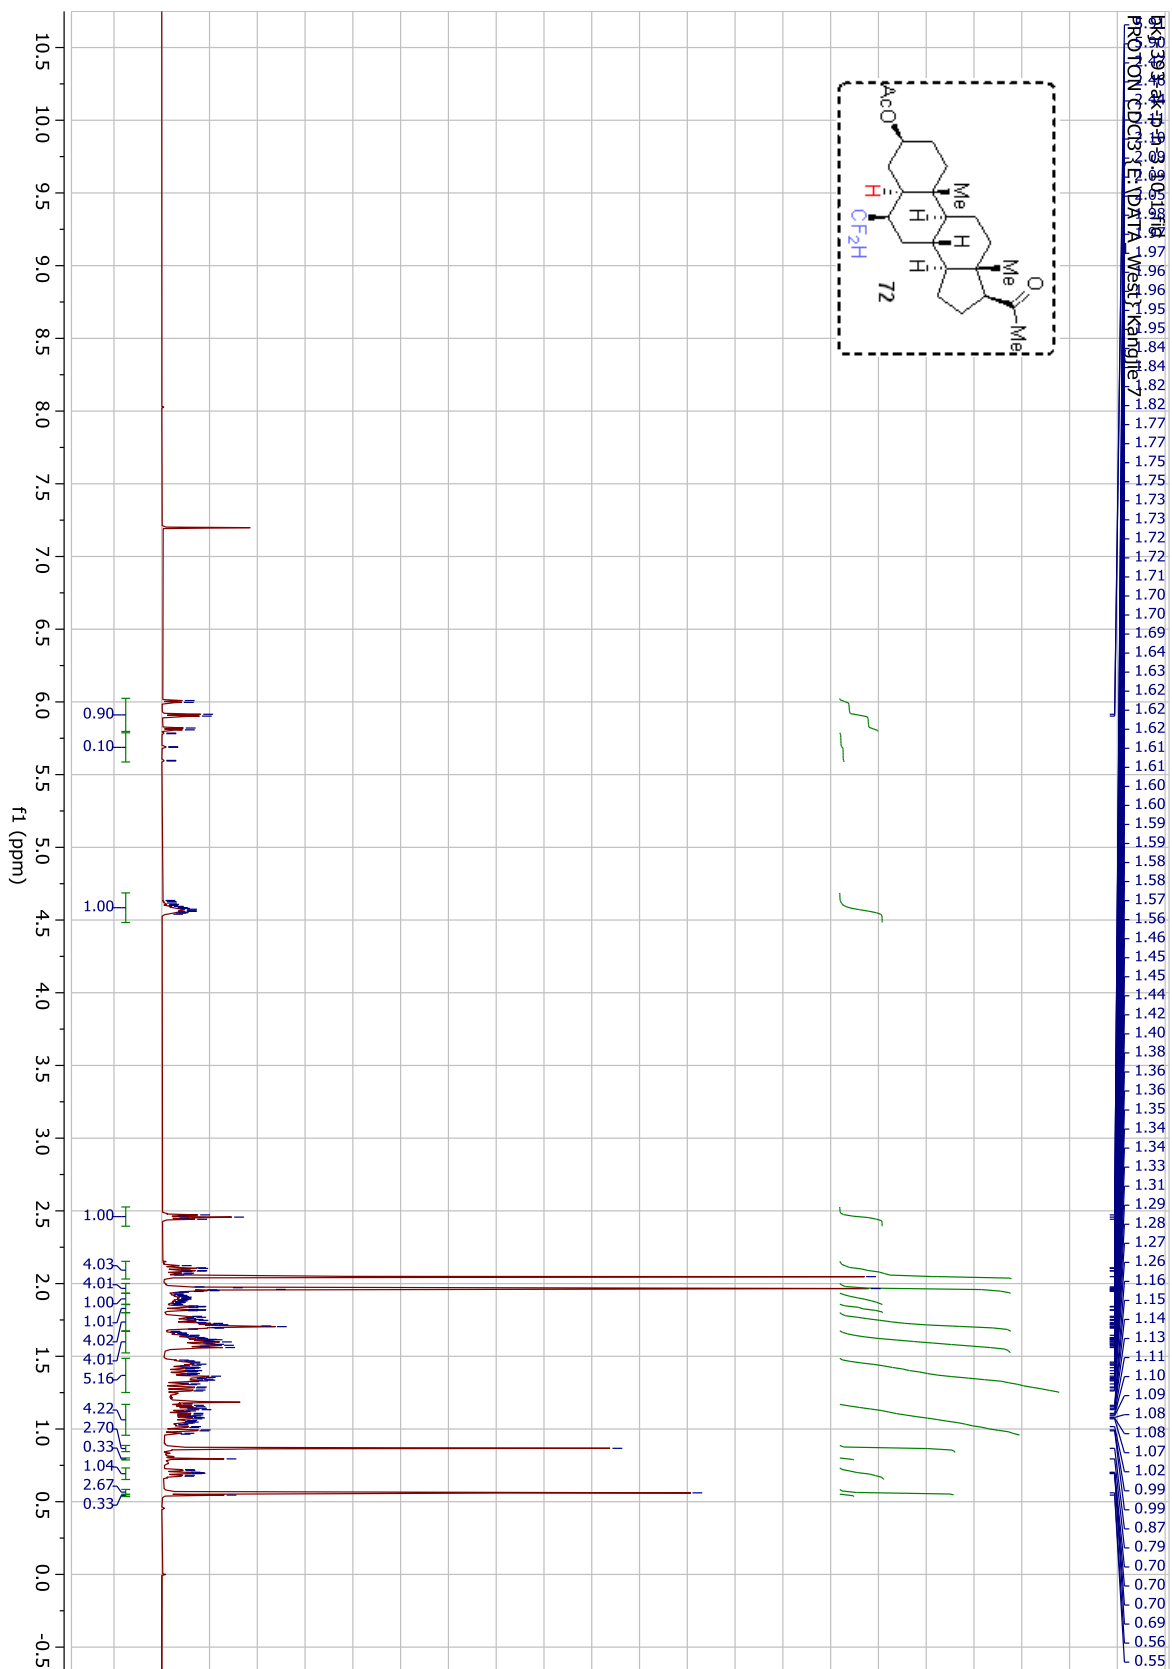



bk1\_393-ak-p-f-3.10.10.fid  
ZedBnCMz2OCHO-SelectF-10%NappCN2-10%MnOAc2.4H2O-1mLCH3CN-H  
F19\_CDCl3 {D:\DATA\West\ Hai 10  
F19\_3ZMS CDCl3 {D:\DATA\West\ Kangjie 9

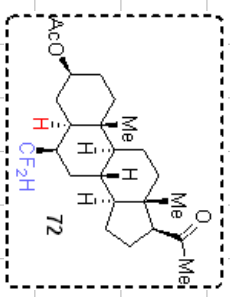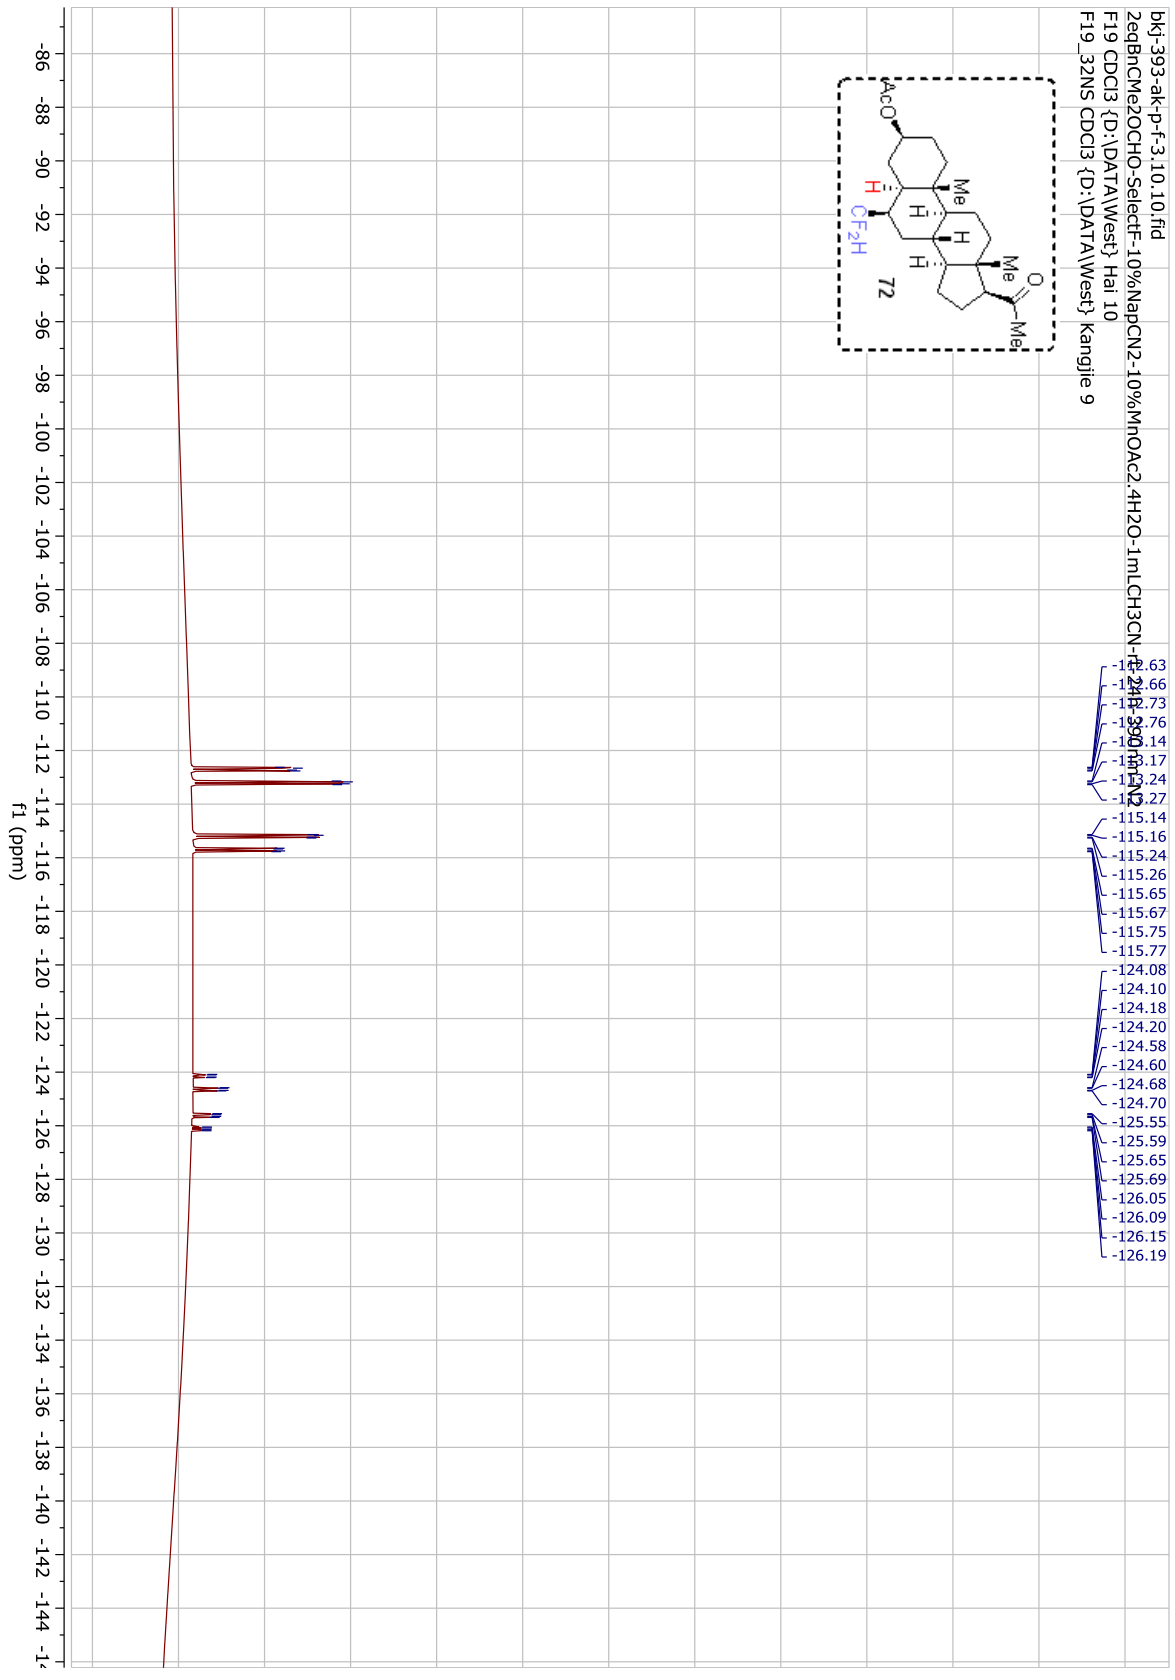

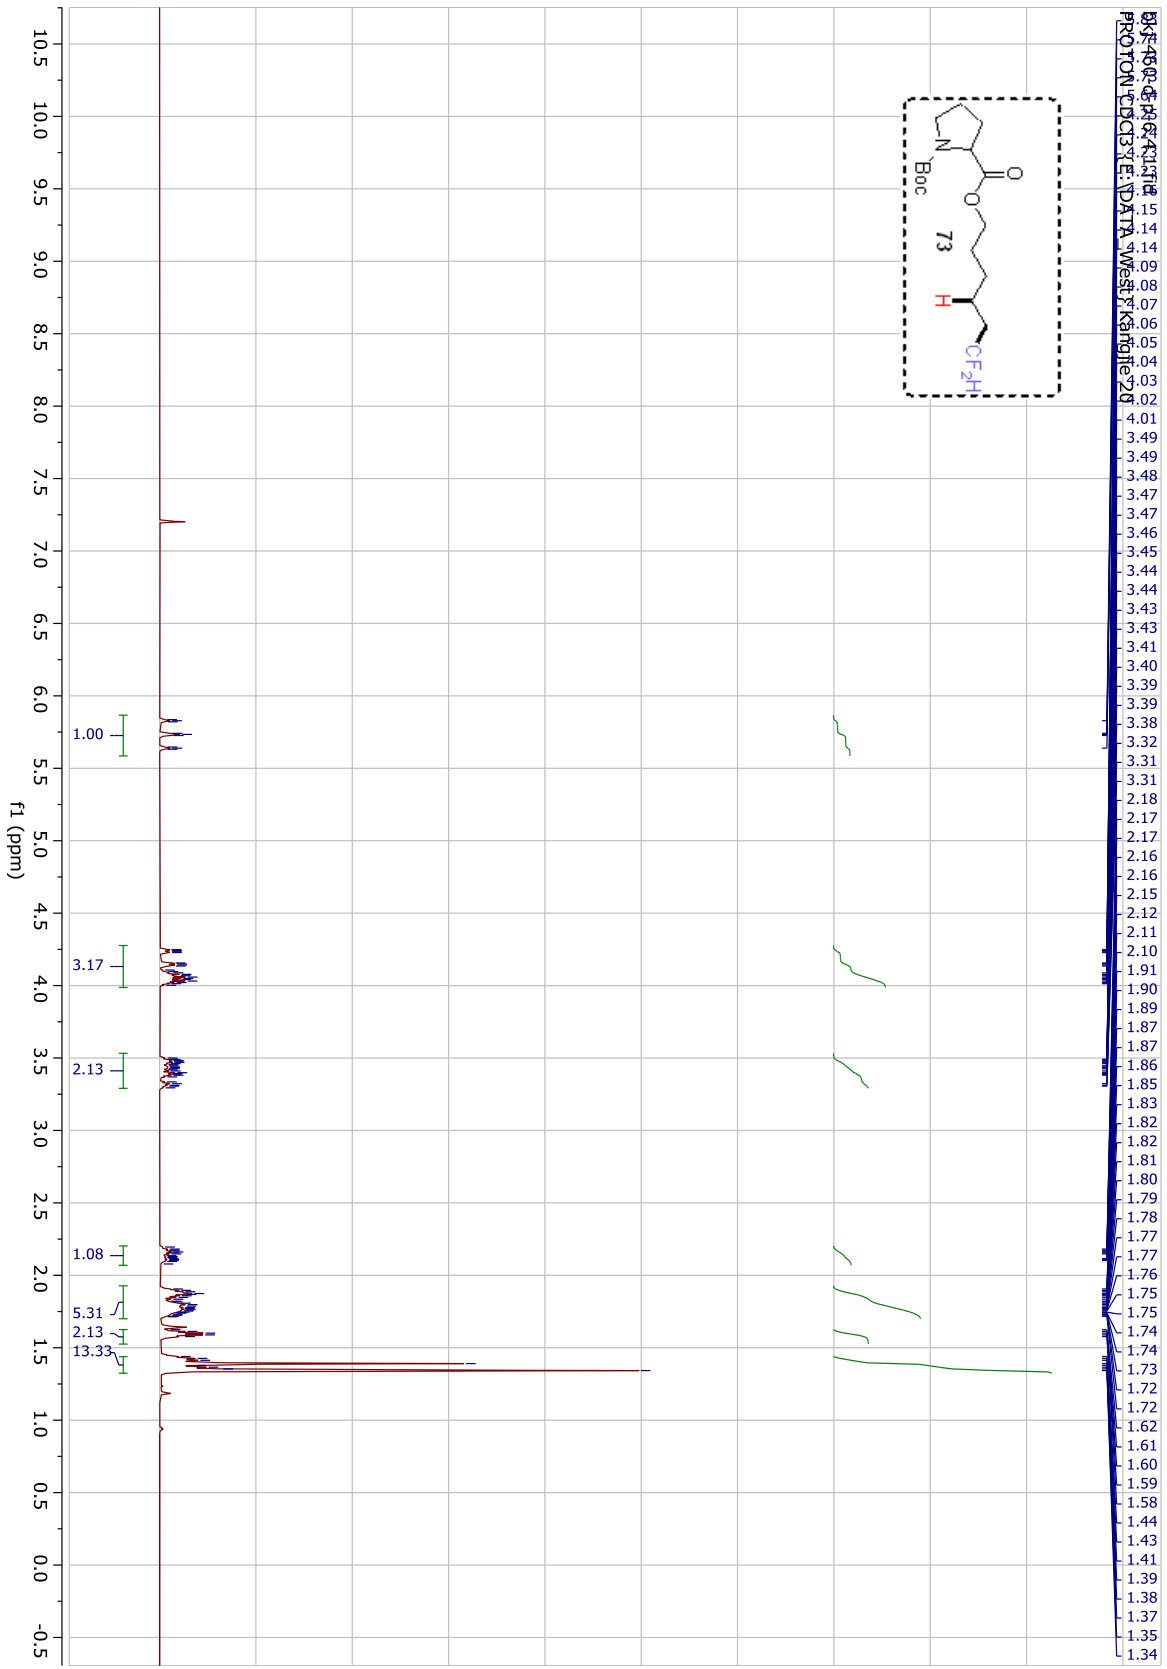

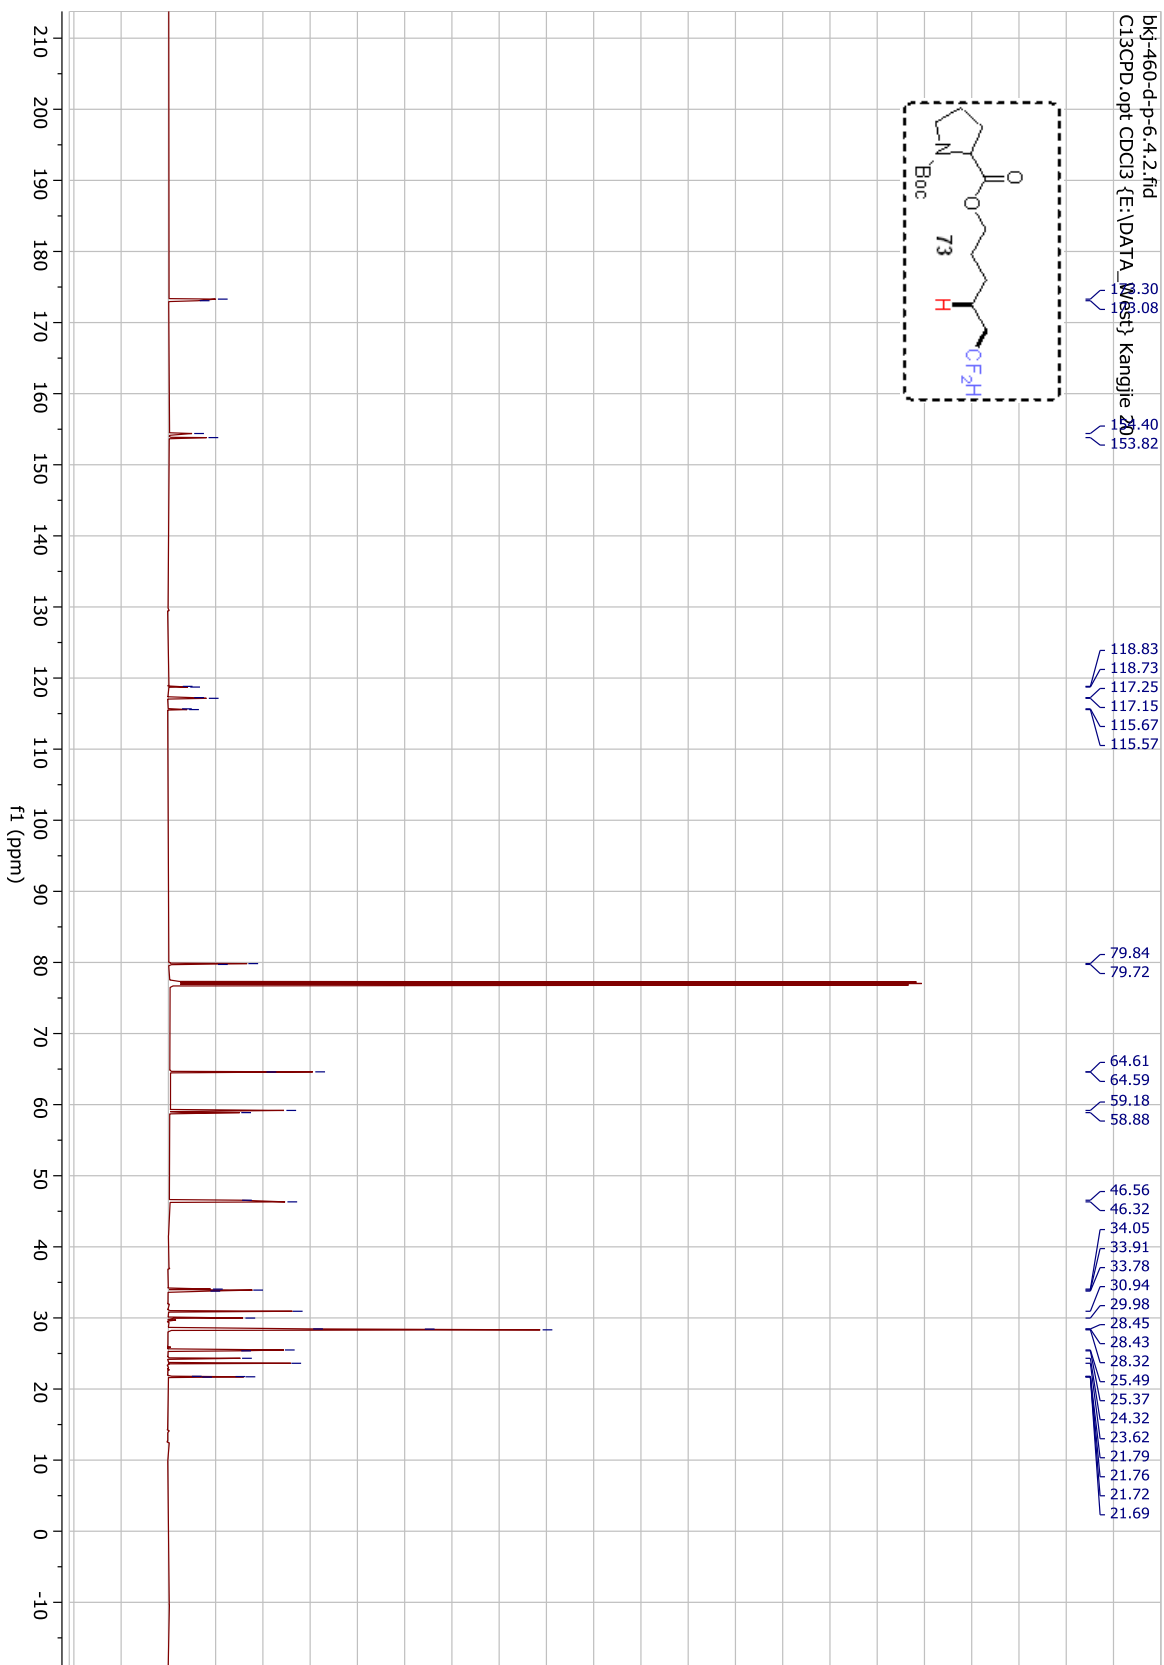

bkj-460-d-p-f-6.5.21.fid  
F19

CMC\_F19 CDCl3 (D:\DATA\West) Kangjie 23

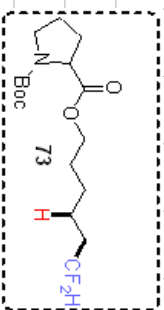

-115.82  
-115.85  
-115.87  
-115.88  
-115.90  
-115.92  
-115.93  
-115.95  
-115.97  
-115.98  
-116.00  
-116.03

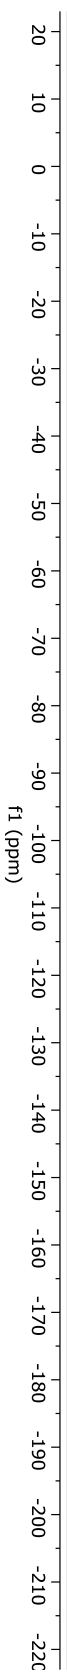

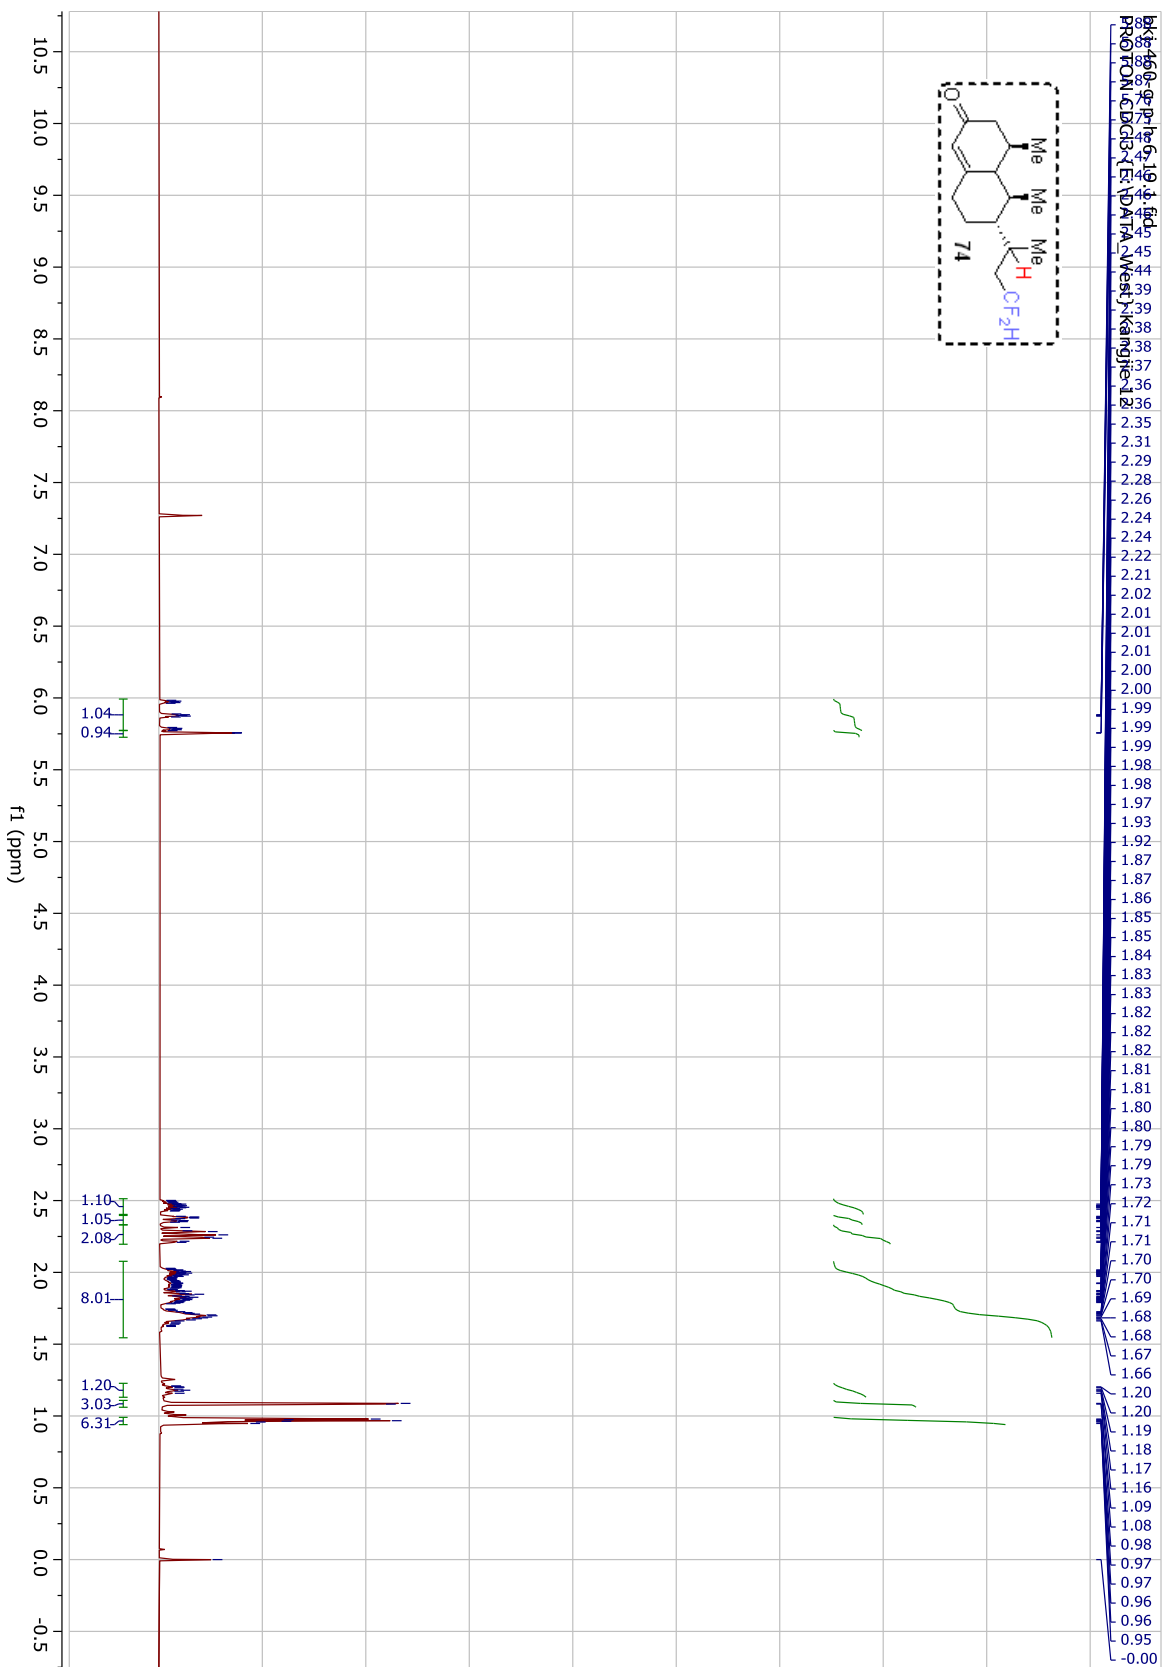



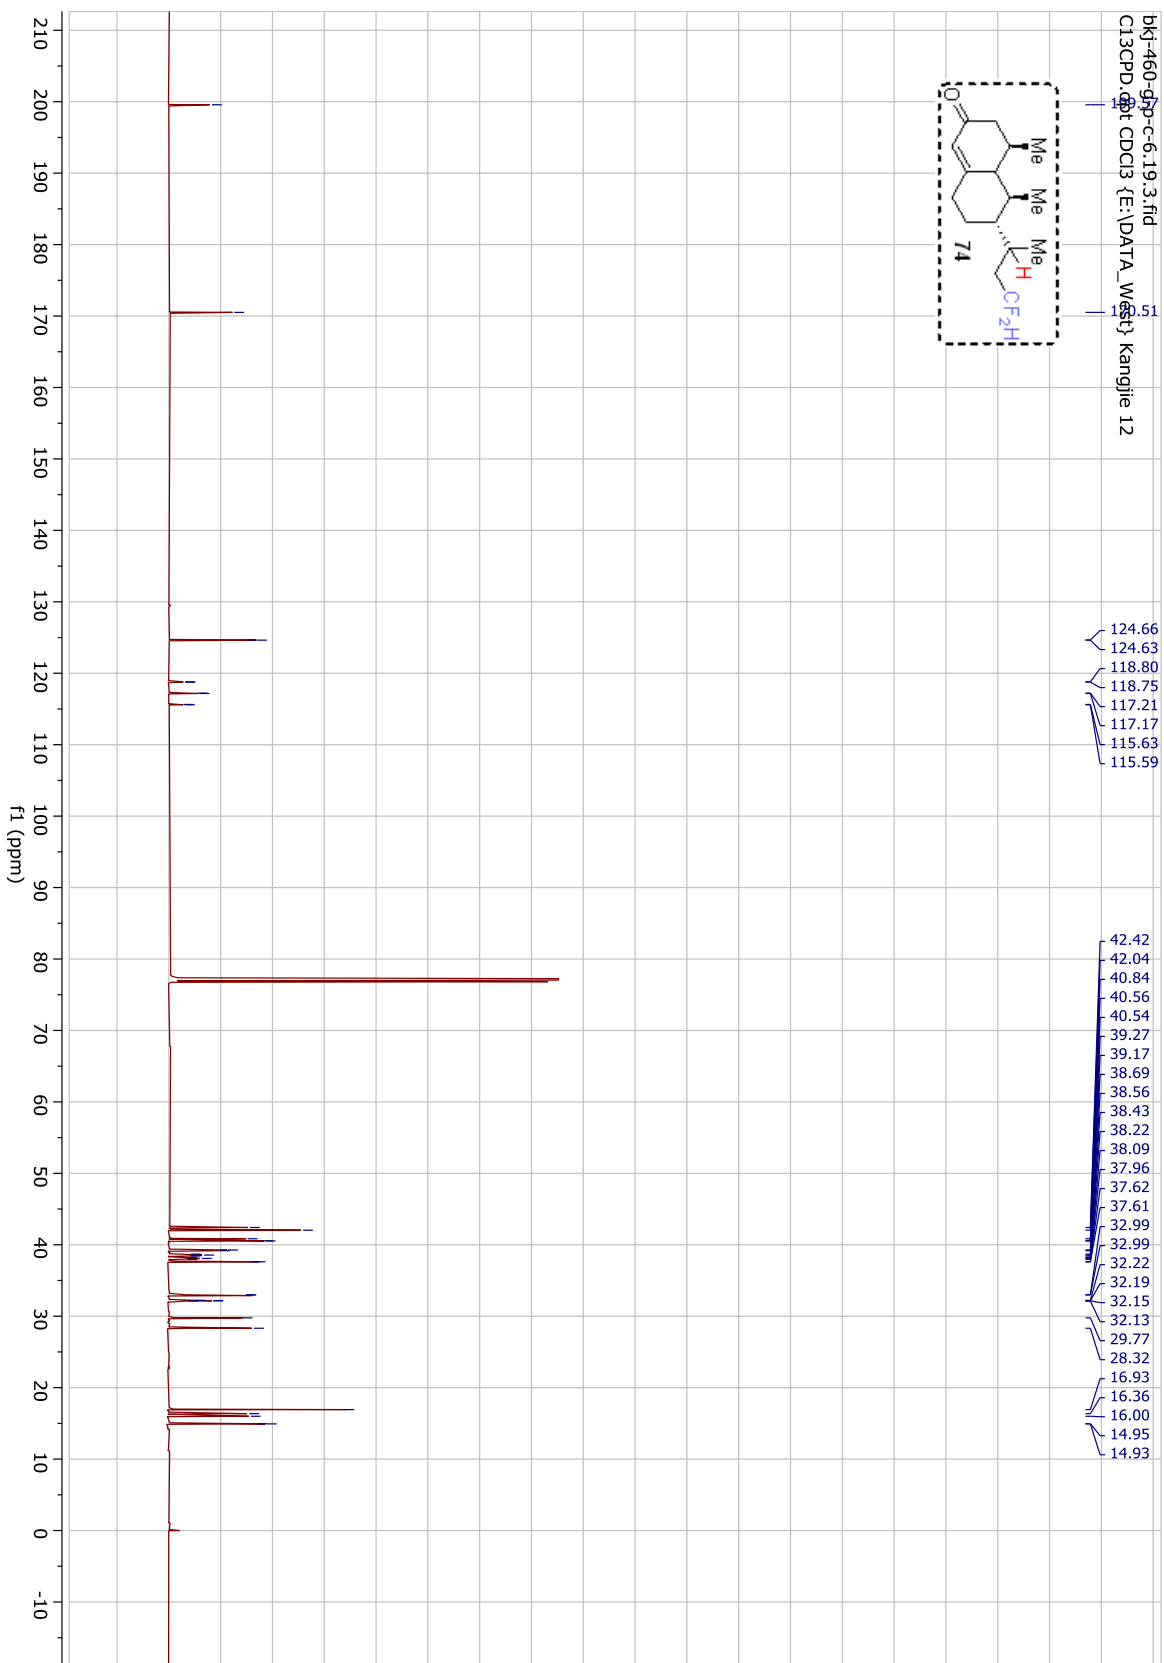

bj-460-g-p-f-6.19.10.ftd  
F19

CMC\_F19 CDCl3 (D:\DATA\West) Kangjie 16

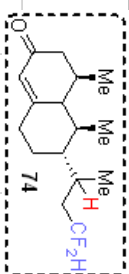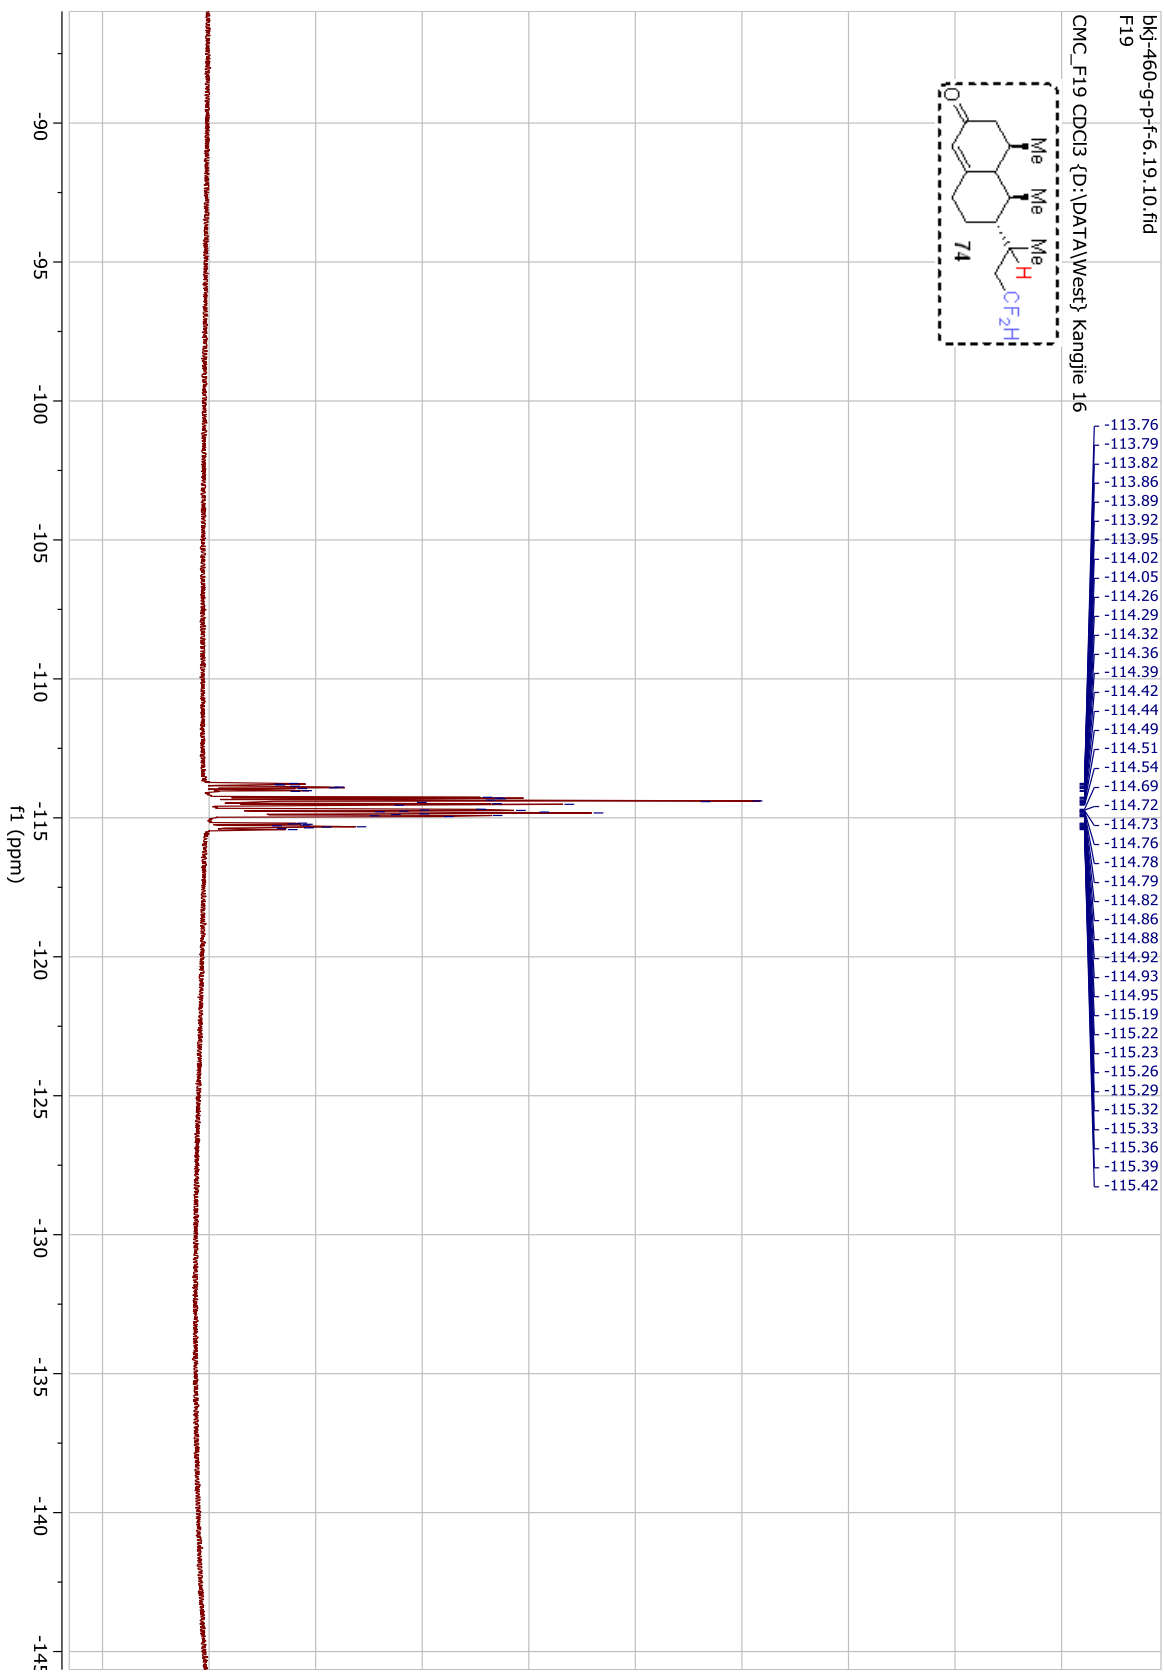

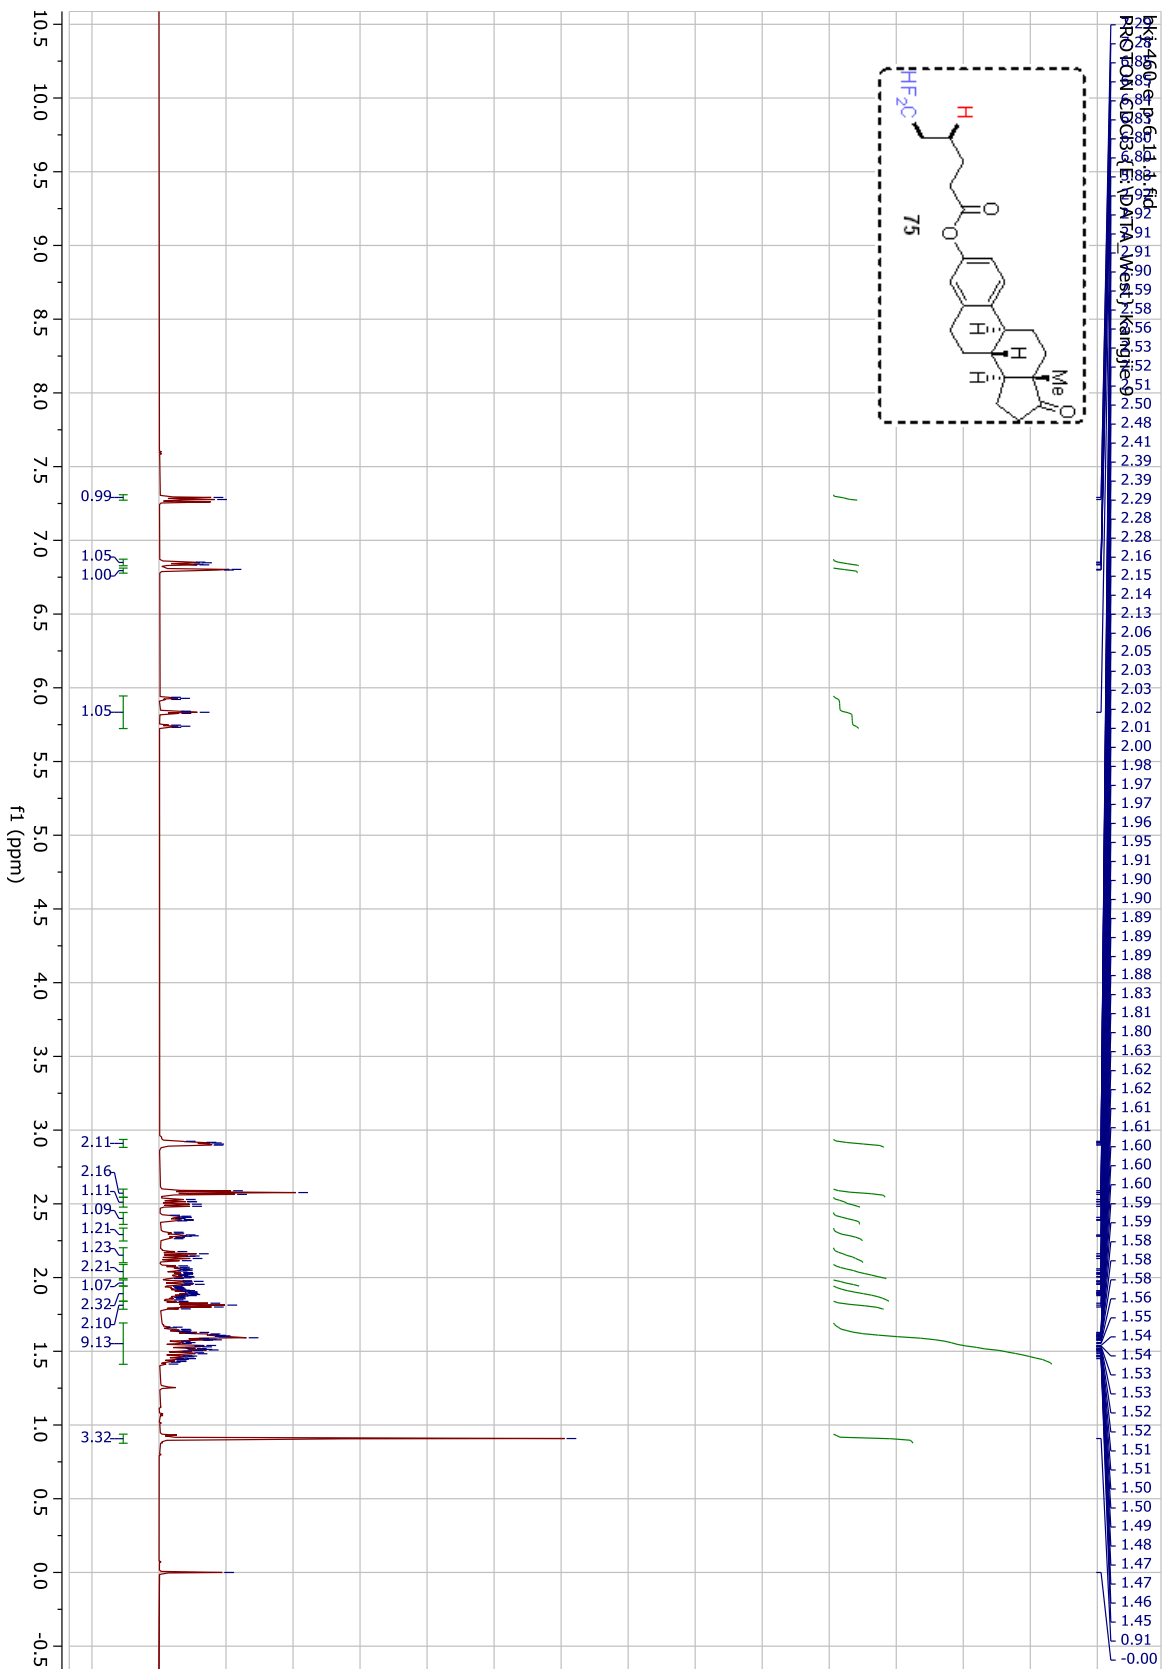

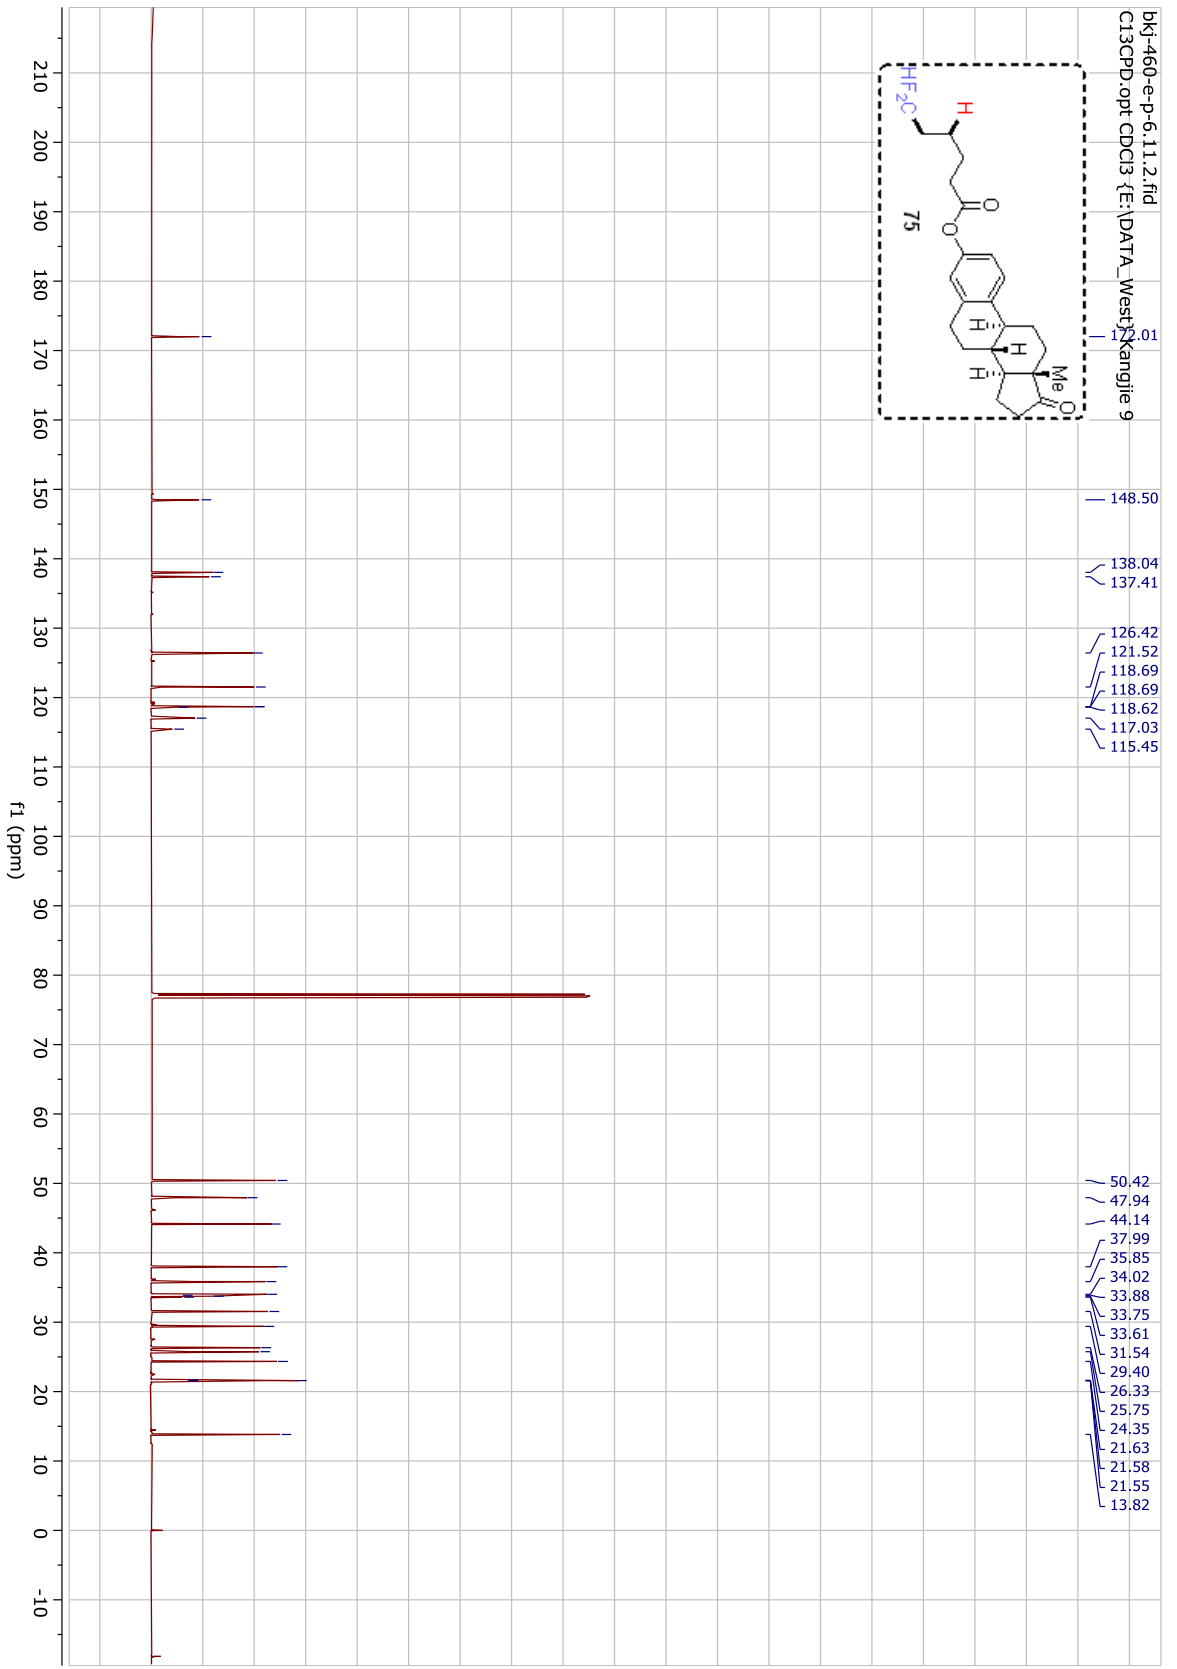

bkj-460-e-p-f-6.19.11.ftd  
F19

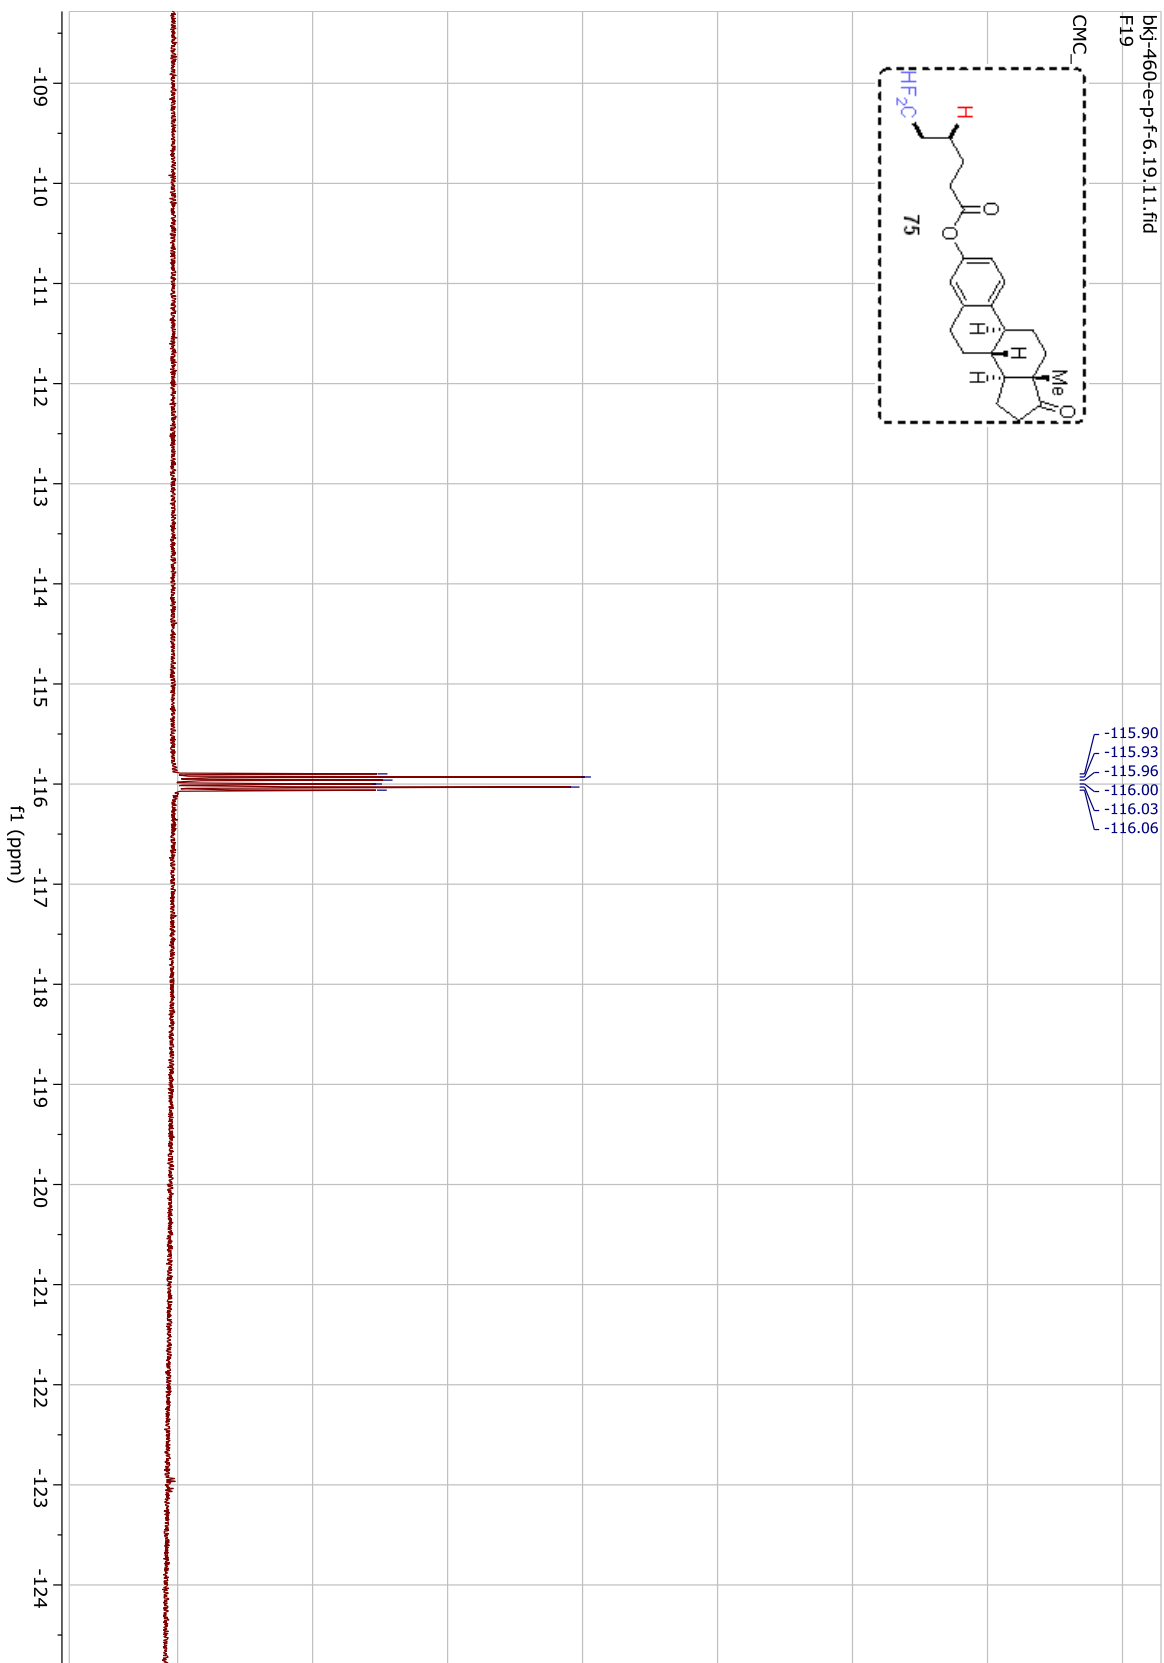

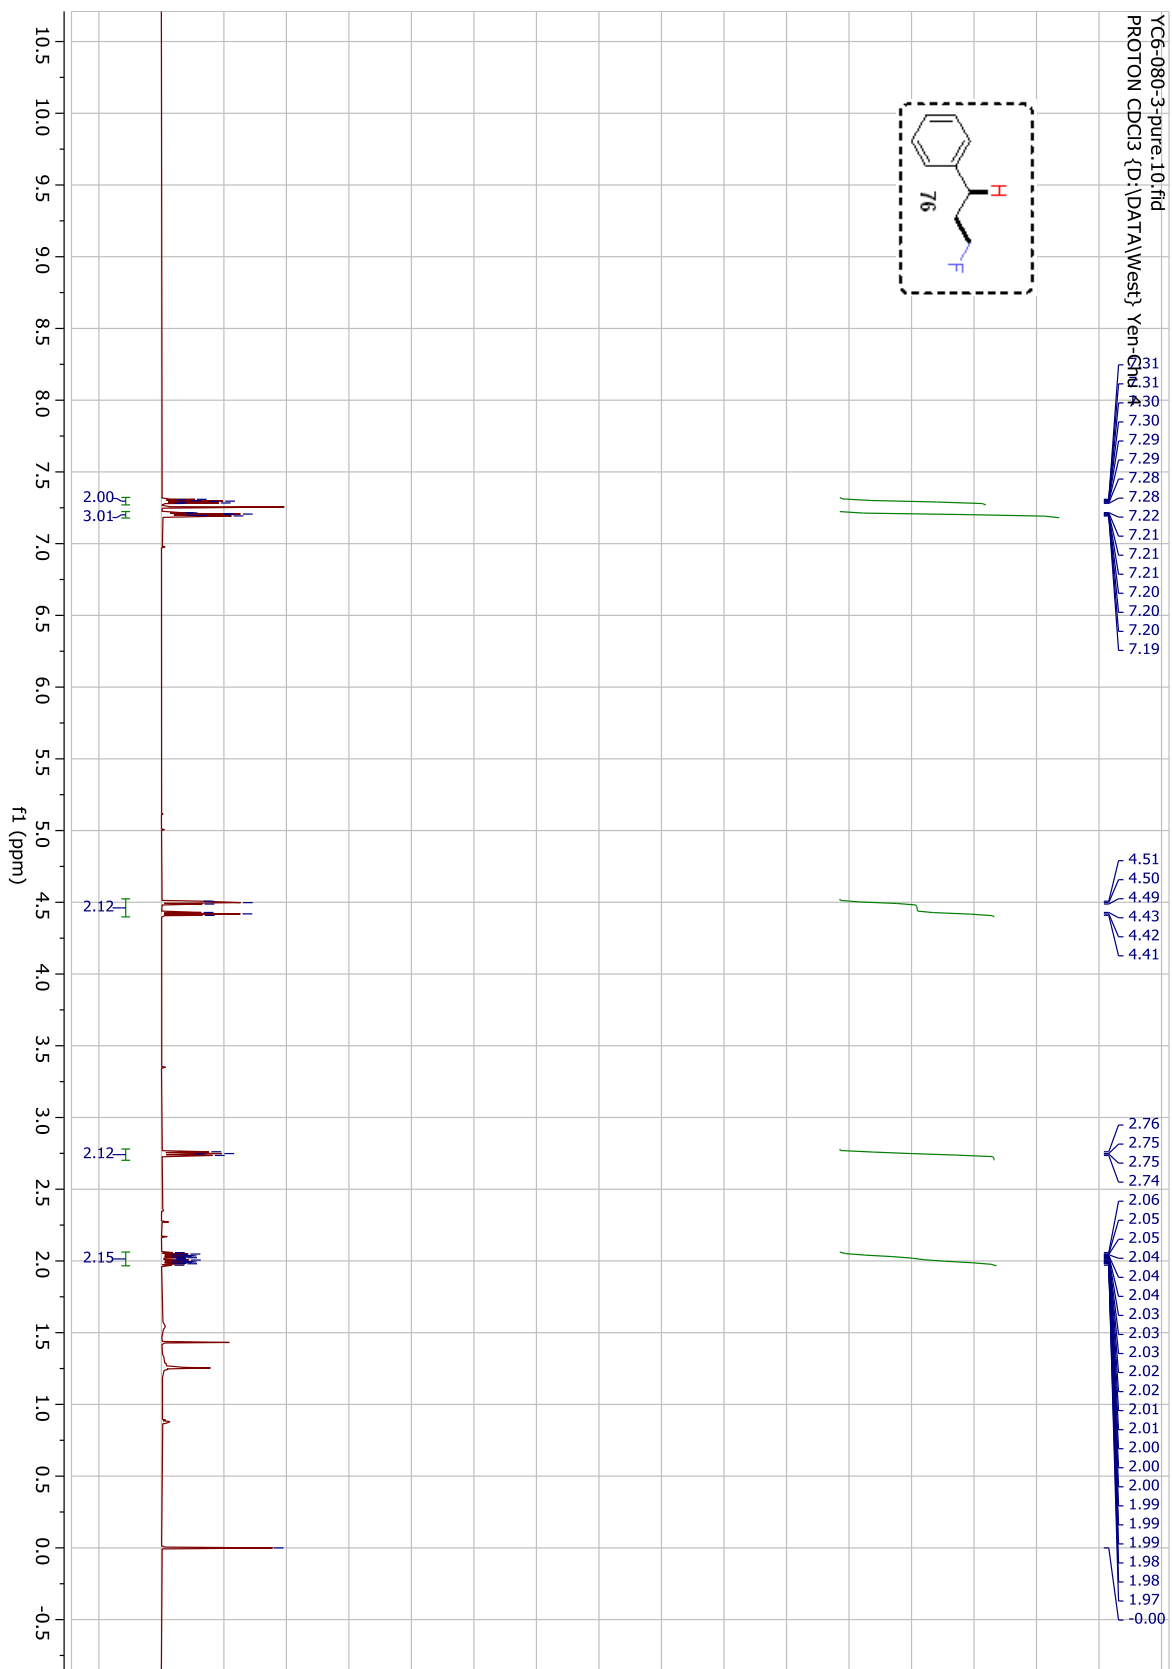

YC6-080-3-pure.11.fid  
C13CPD32 CDCl3 {D:\DATA\West}\Yen-Chu 4

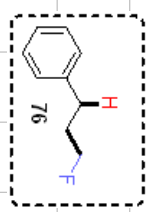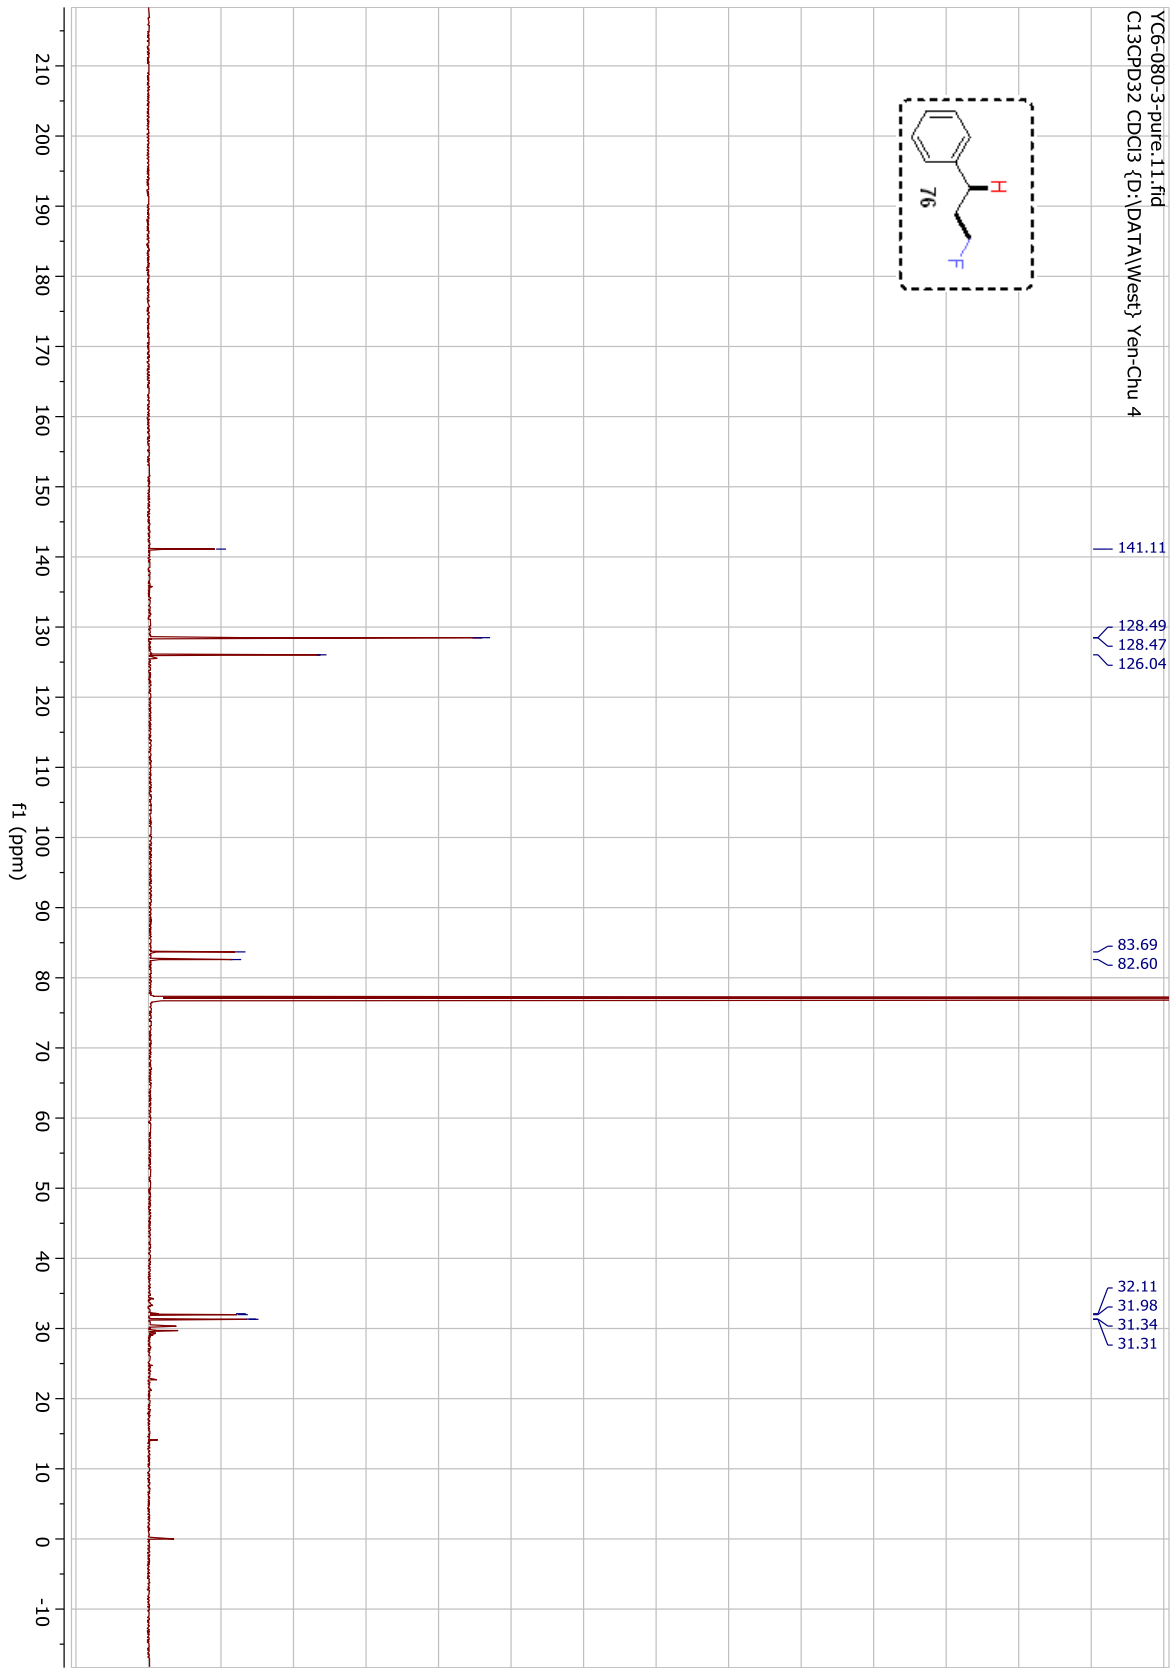

YC6-080-3-pure.12.fid  
F19\_baseline\_correct ID  
F19\_baseline\_correct CDCI3 {D:\DATA\West} Yen-Chu 4

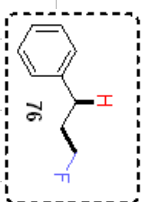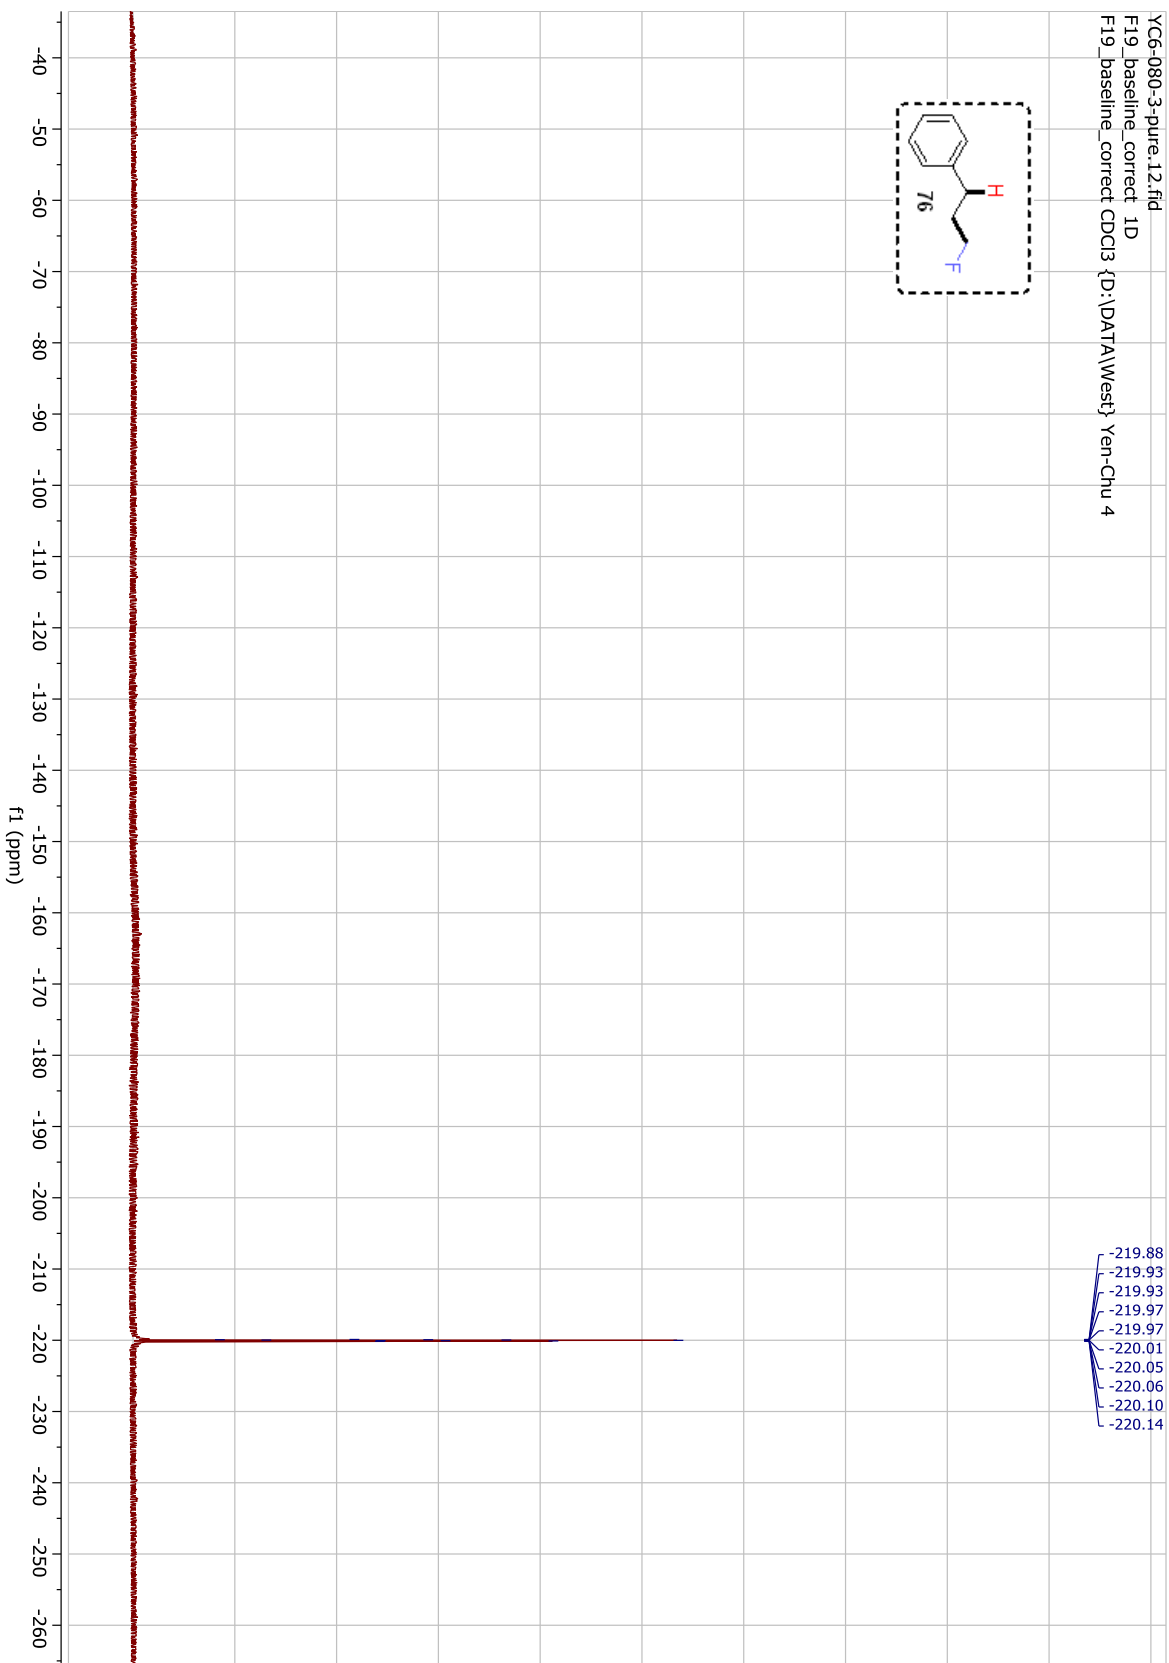



YC6-086-4-pure.20.fid  
PROTON CDCl3 {D:\DATA\Westf\Yen-Chu 3

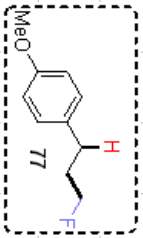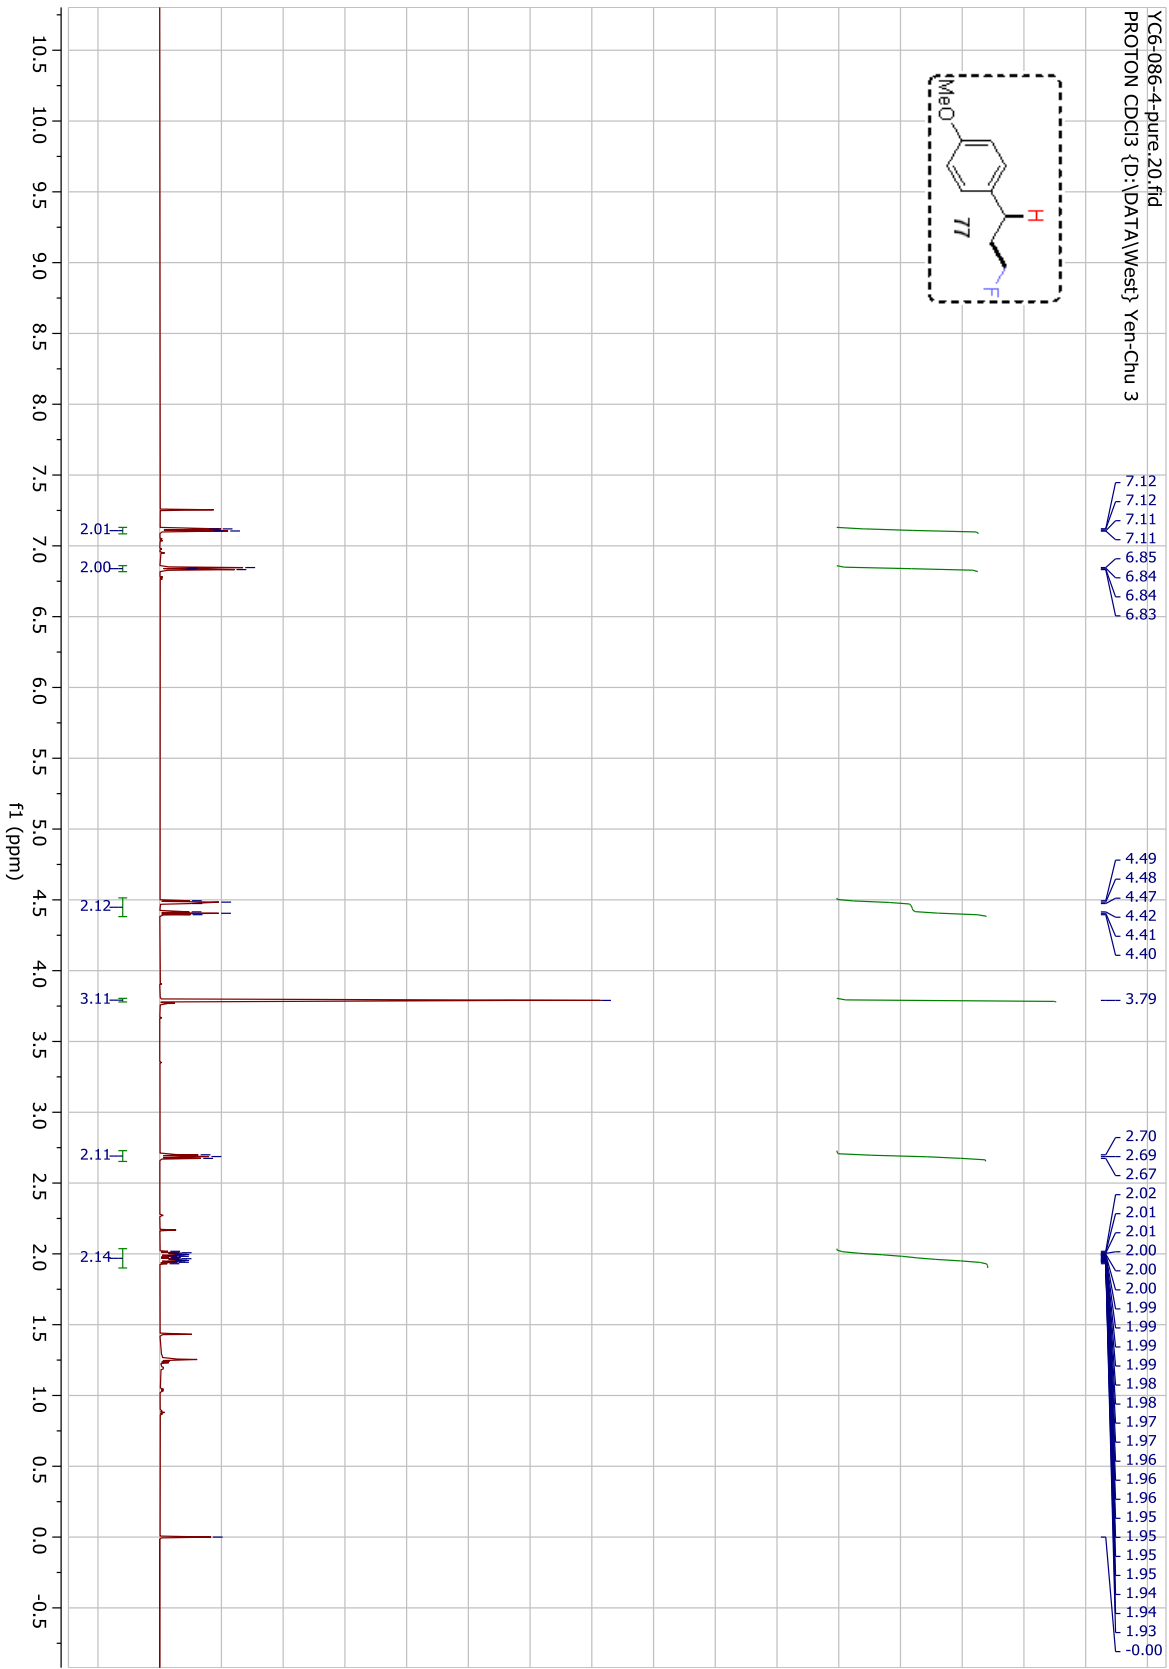

YC6-086-4-pure.21.fid  
C13CPD32 CDCl3 {D:\DATA\West}\Yen-Chu 3

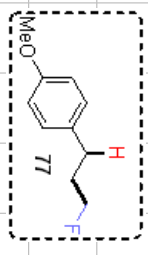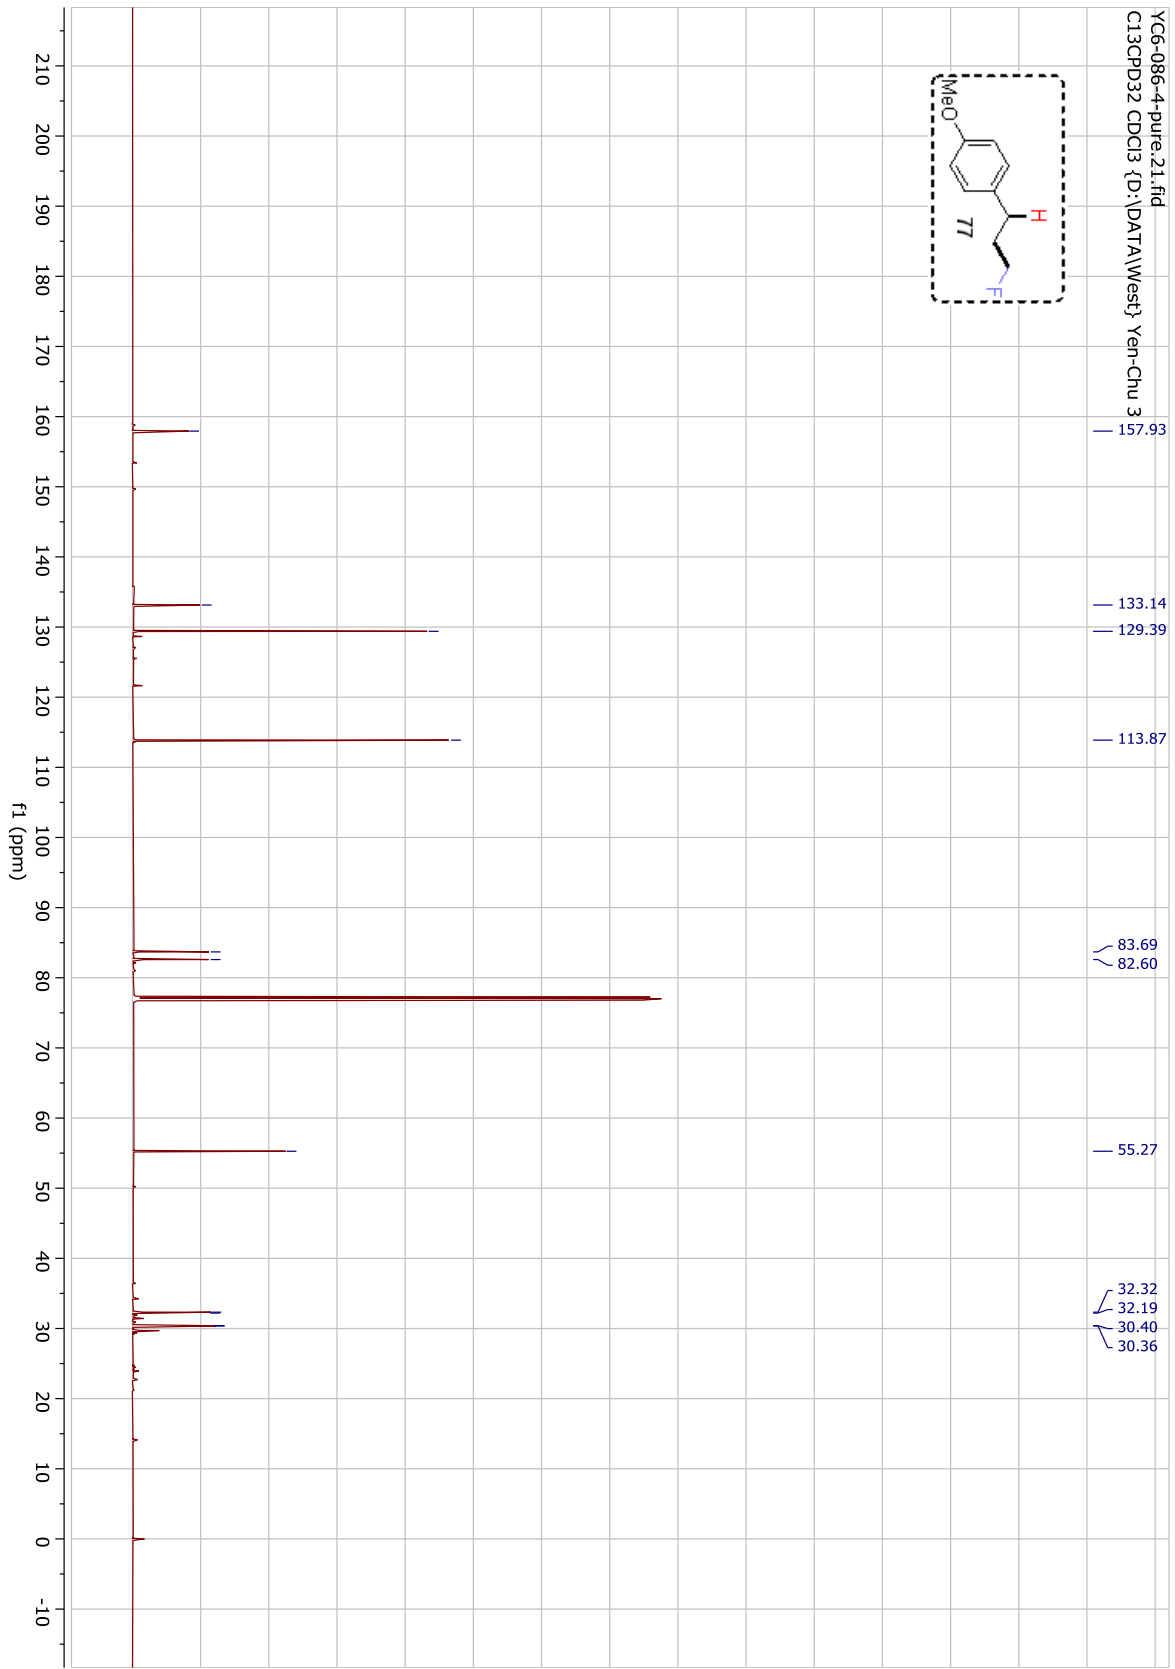

YC6-086-4-pure.22.ftd  
F19\_baseline\_correct ID  
F19\_baseline\_correct CDC13 {D:\DATA\West} Yen-Chu 3

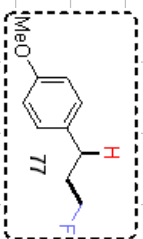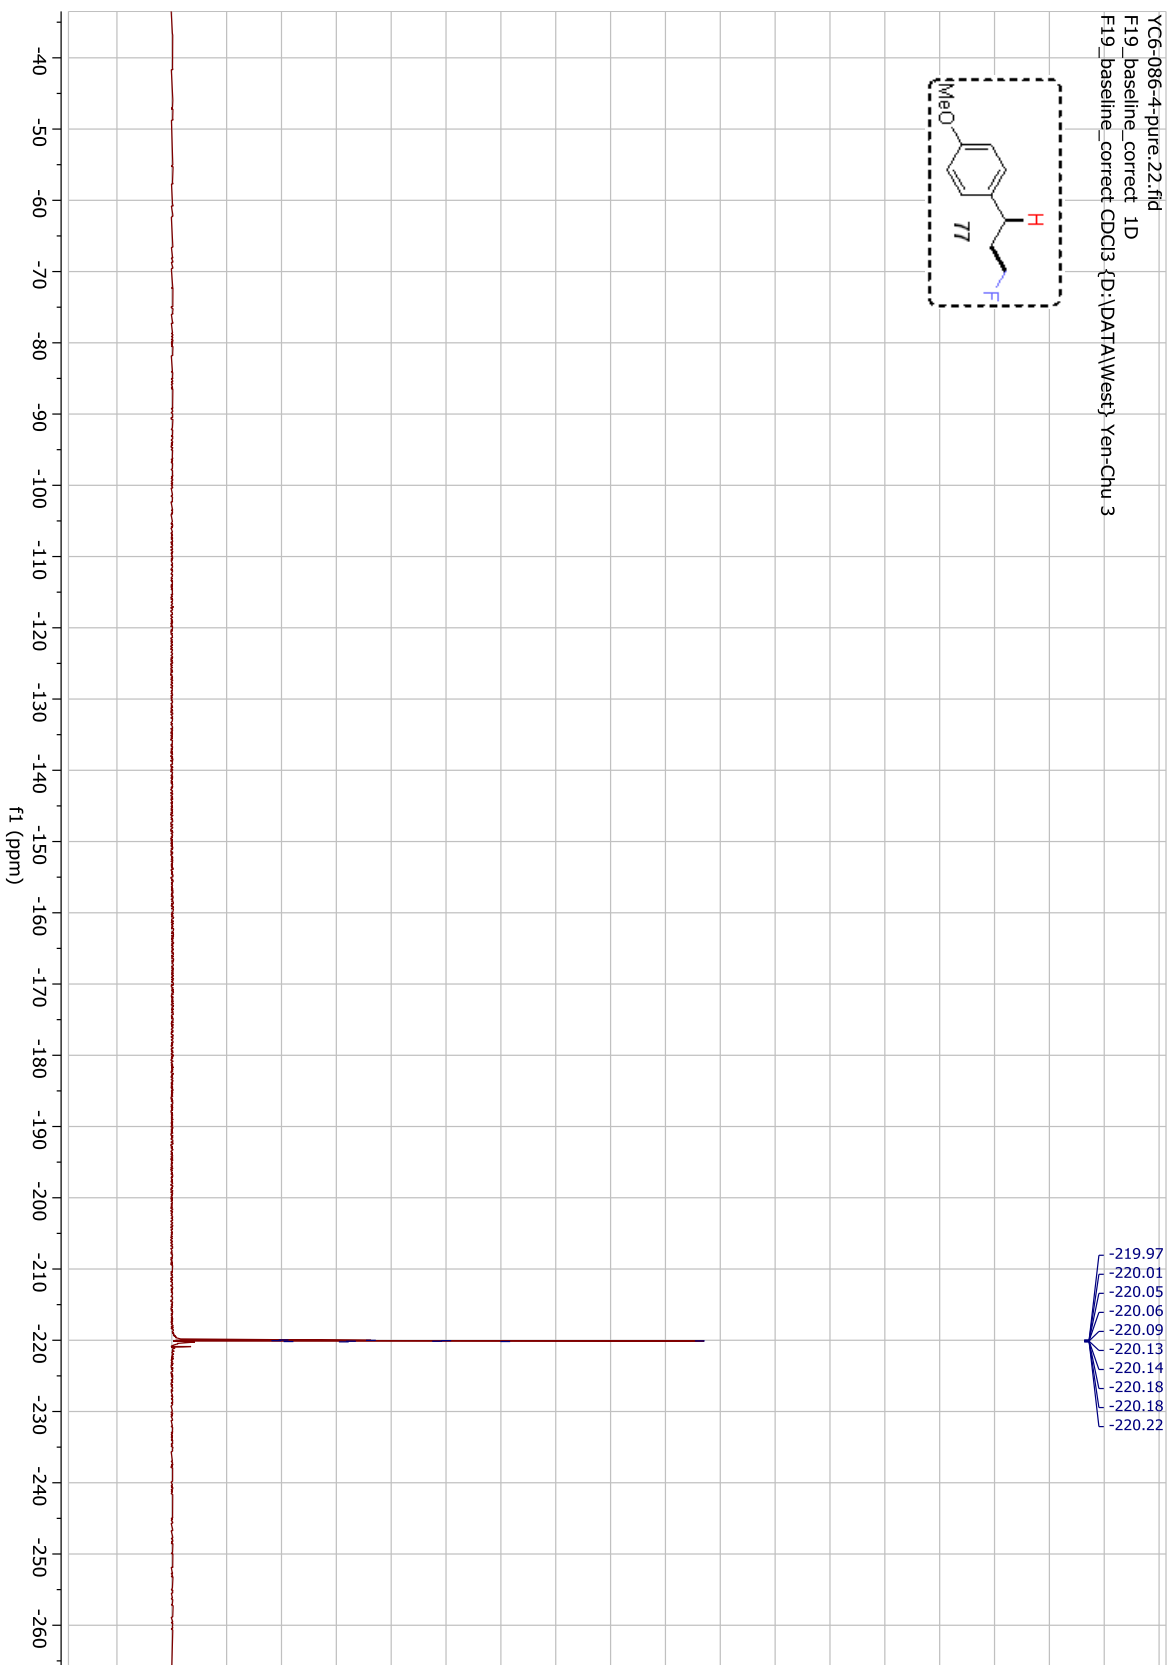

YC6-089-2-pure 4.fid  
PROTON CDCl3 {E:\DATA\_West\Yen-Chu 15

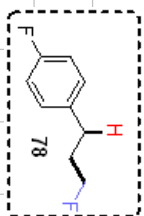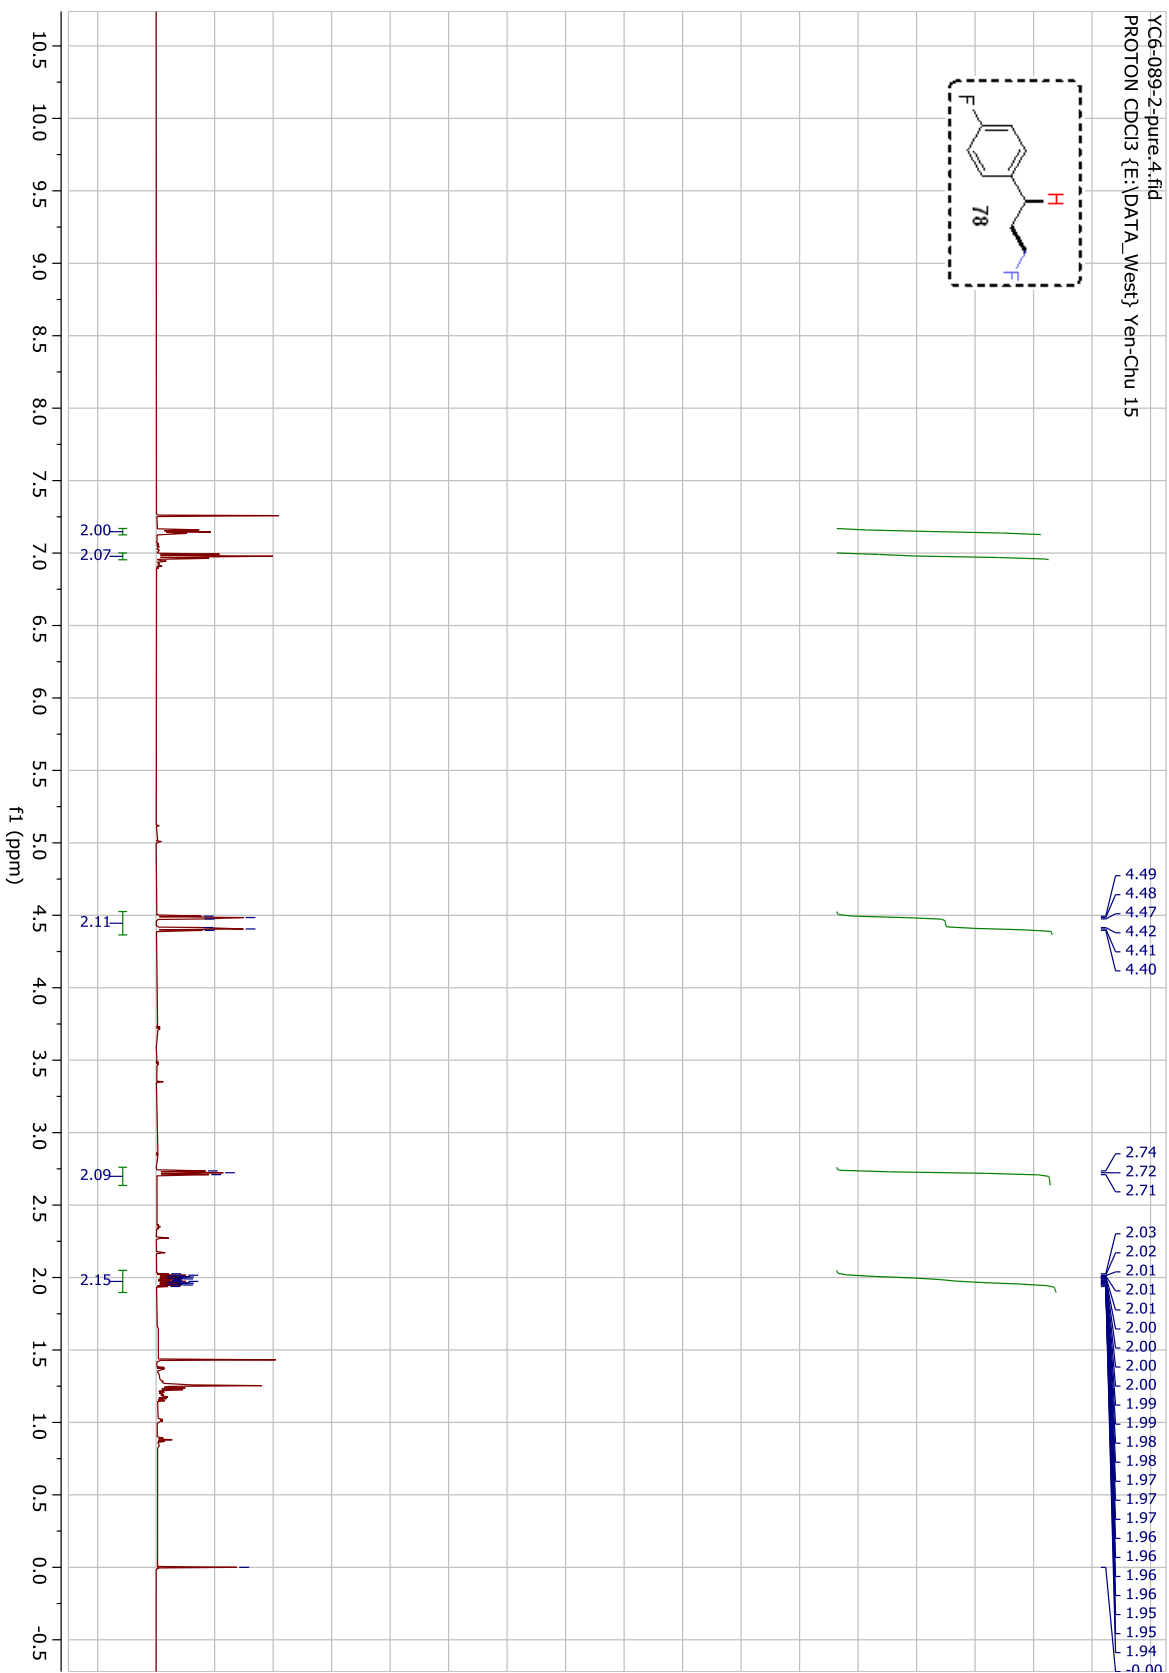

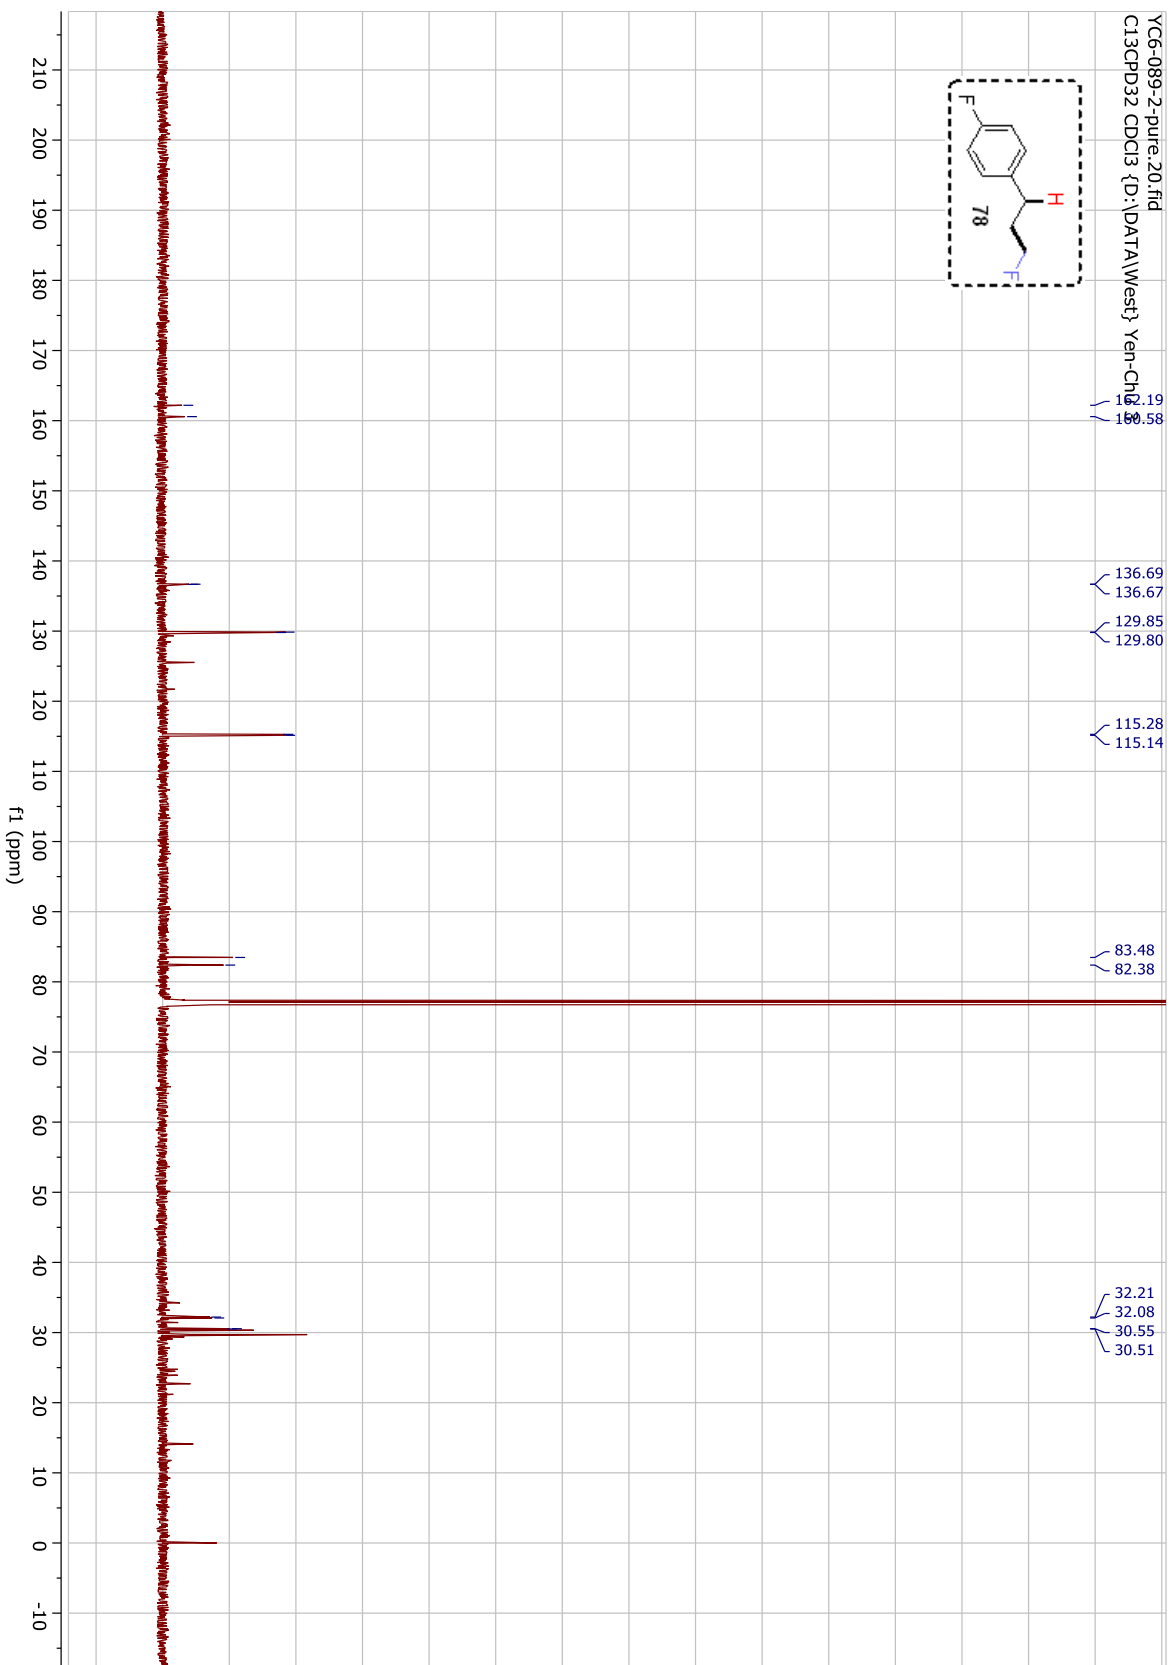

YC6-089-2-pure.60.fid  
F19\_baseline\_correct\_1D  
F19\_baseline\_correct\_CDCl3 {D:\DATA\West}\Yen-Chu 9

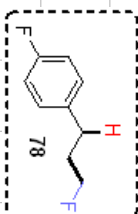

-117.42  
-117.43  
-117.44  
-117.45  
-117.46  
-117.47  
-117.48

-220.19  
-220.24  
-220.28  
-220.29  
-220.32  
-220.36  
-220.37  
-220.41  
-220.45

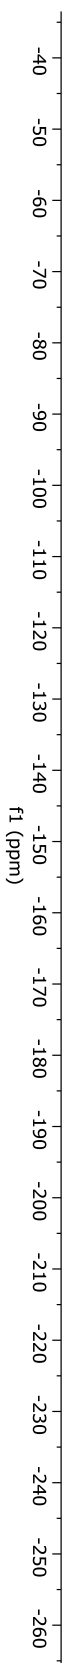

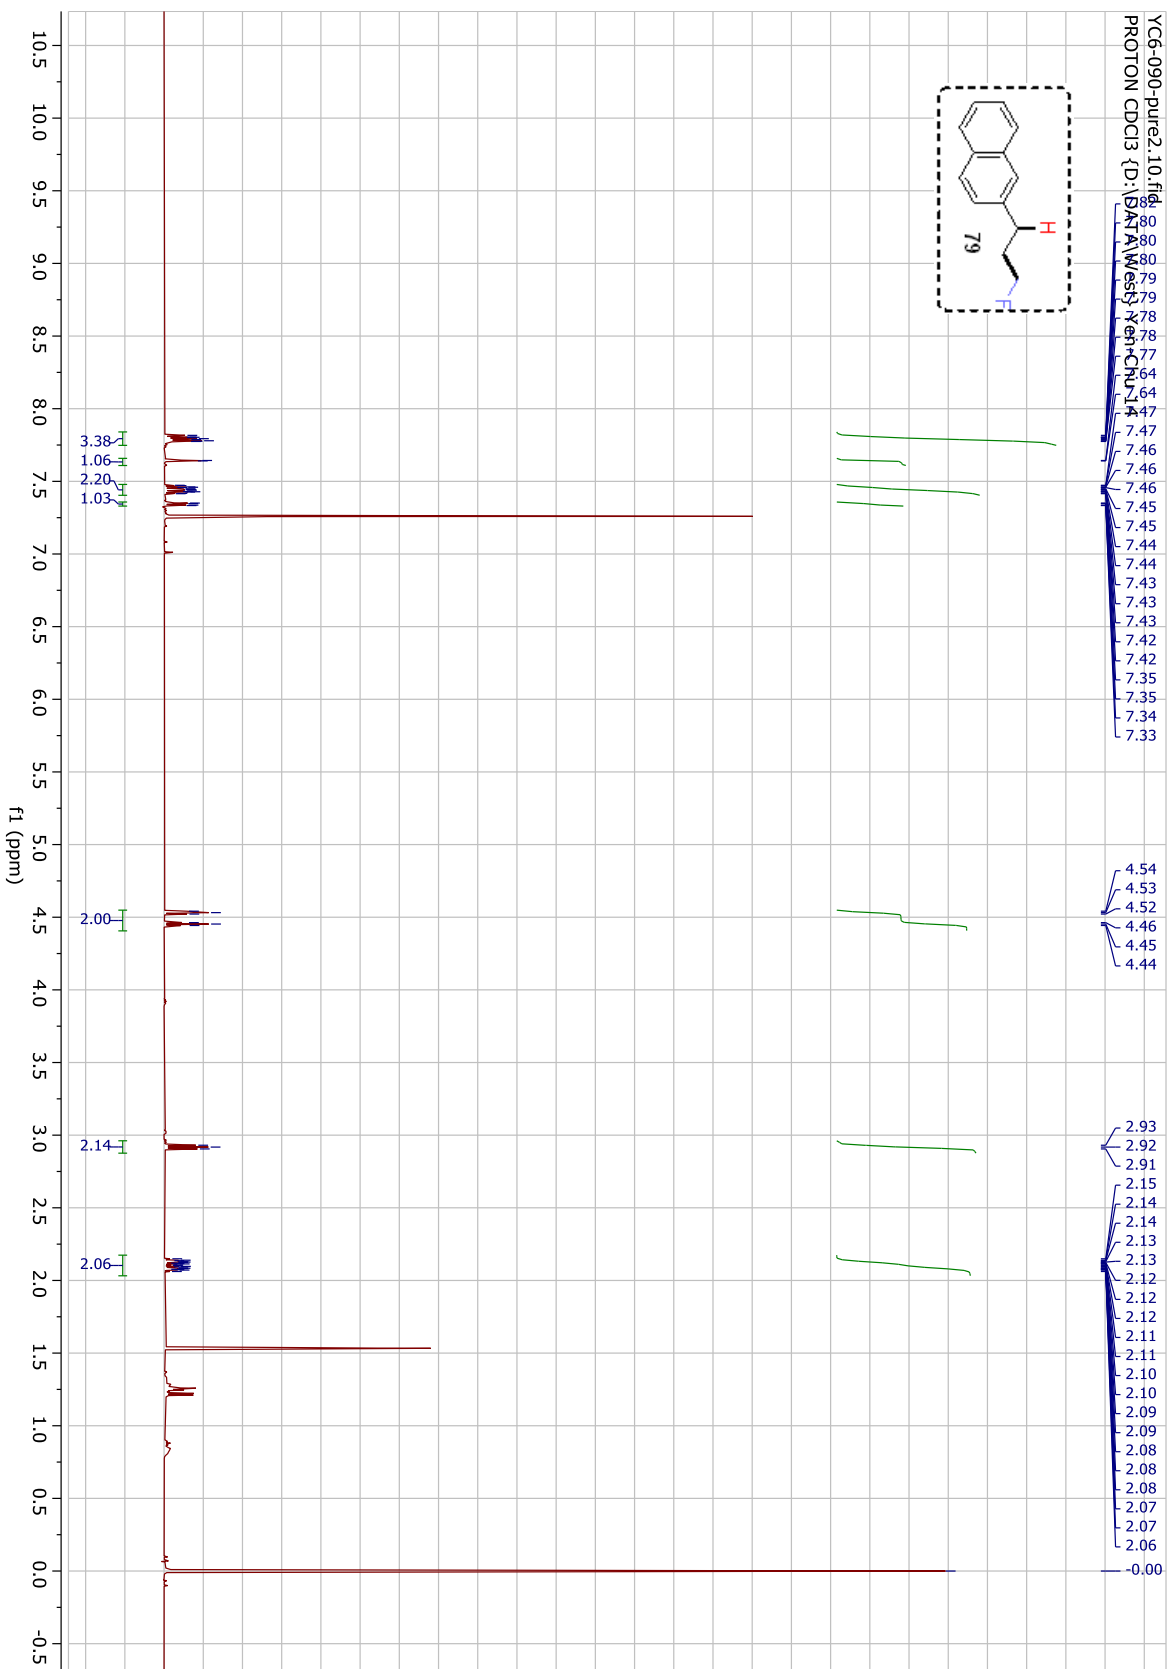

YC6-090-pure2\_11.fid  
C13CPD32 CDCl3 {D:\DATA\Westf\Yen-Chu 14

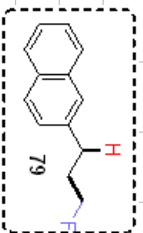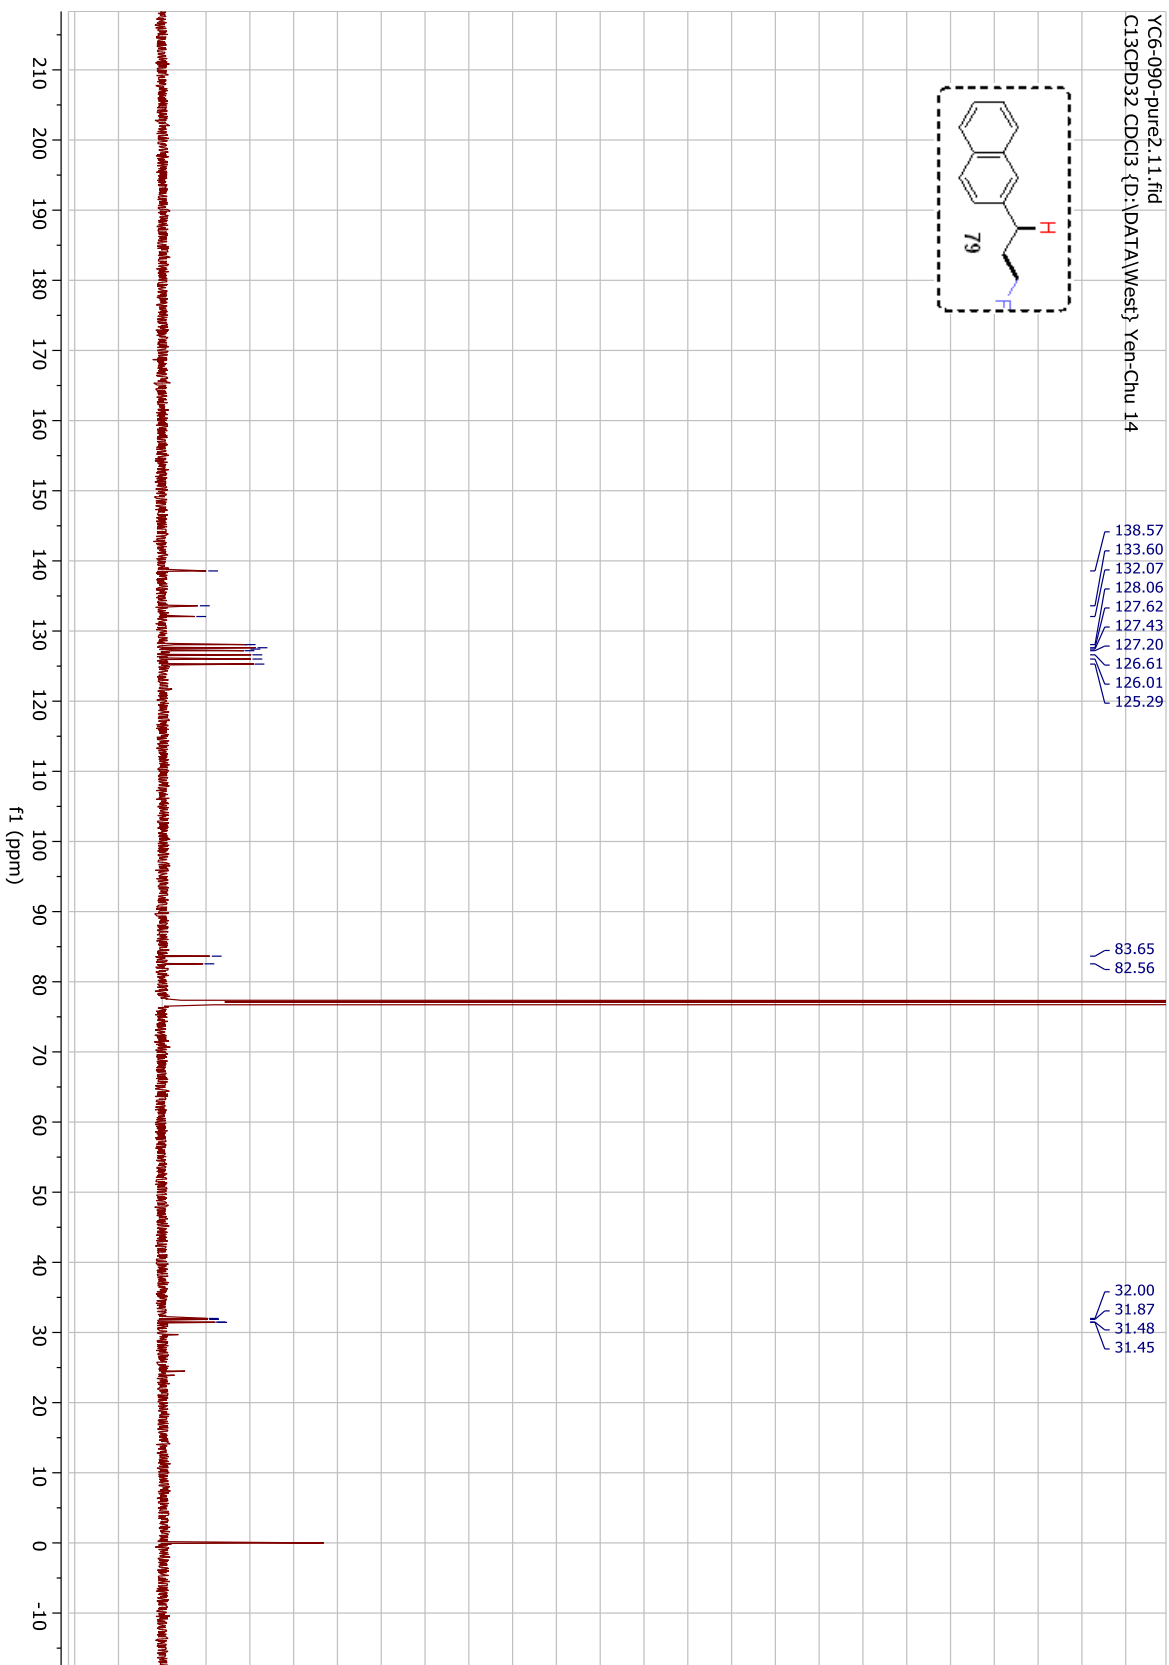



YC6-090-pure.20.fid  
F19\_baseline\_correct ID  
F19\_baseline\_correct CDCI3 {D:\DATA\West\ Yen-Chu 8

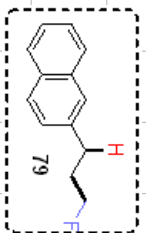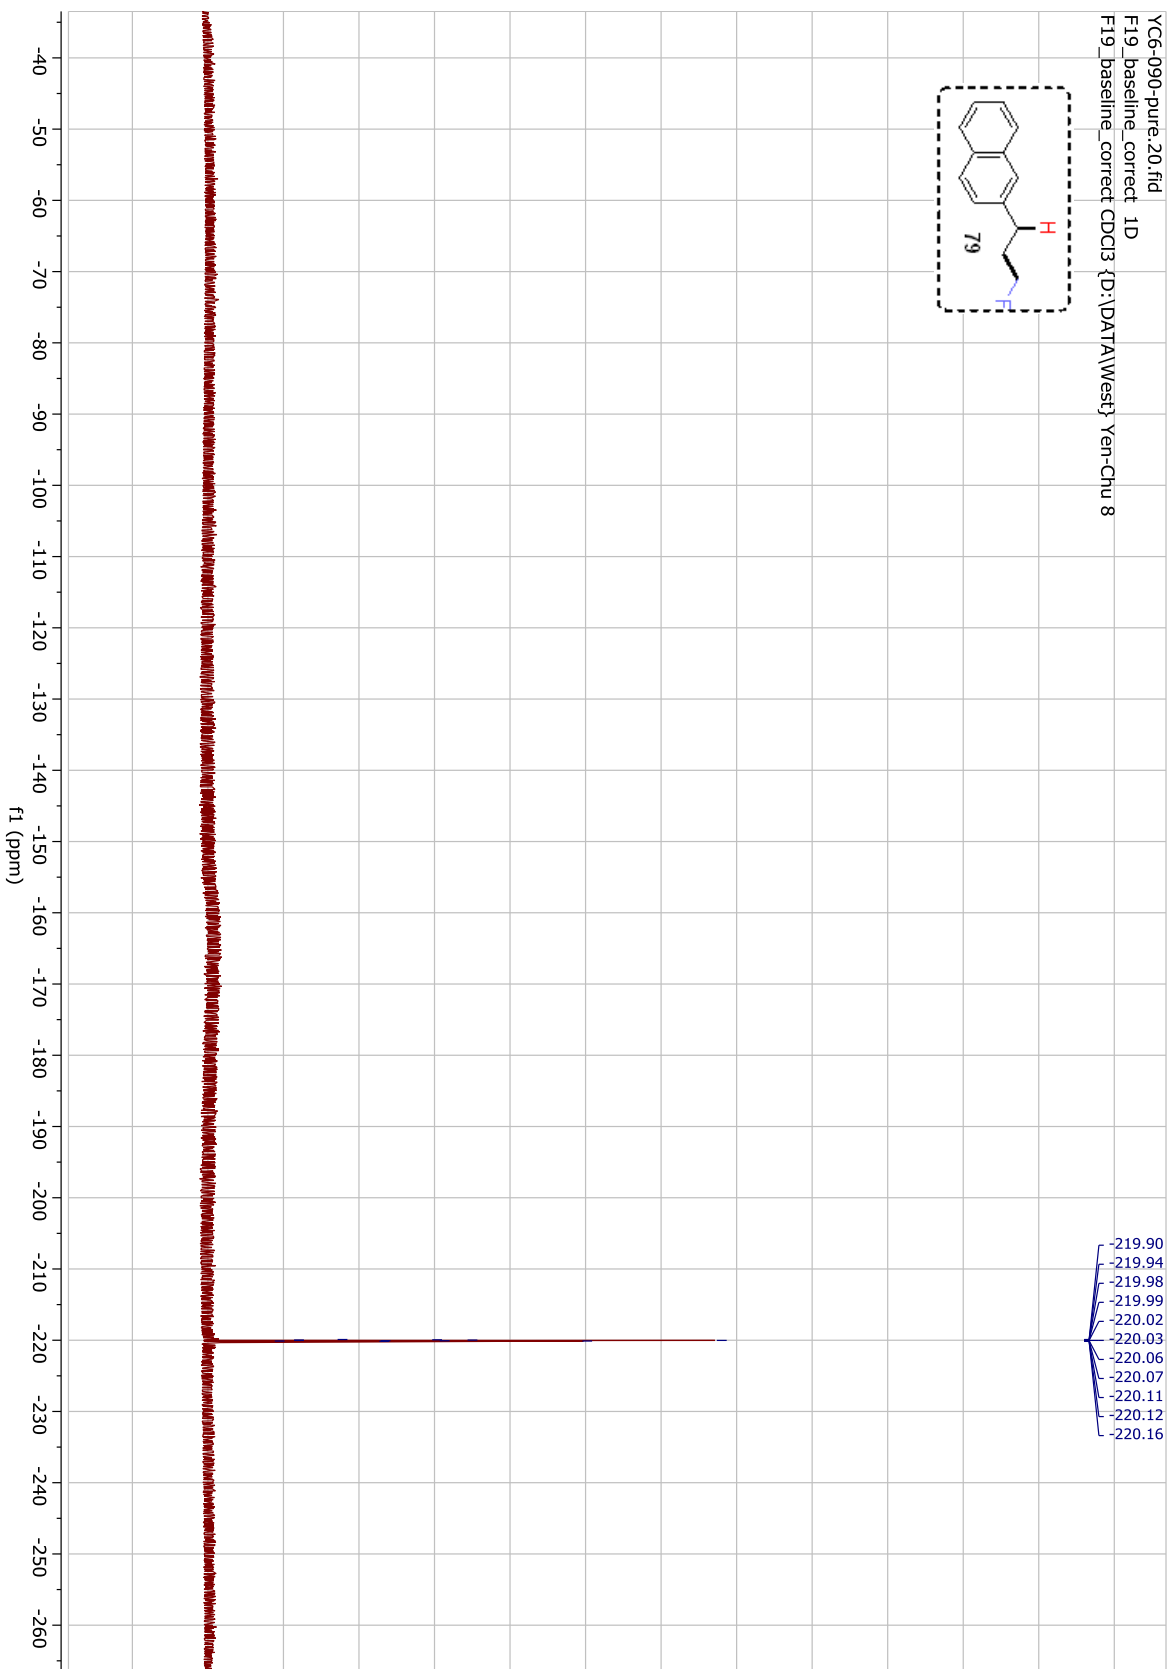

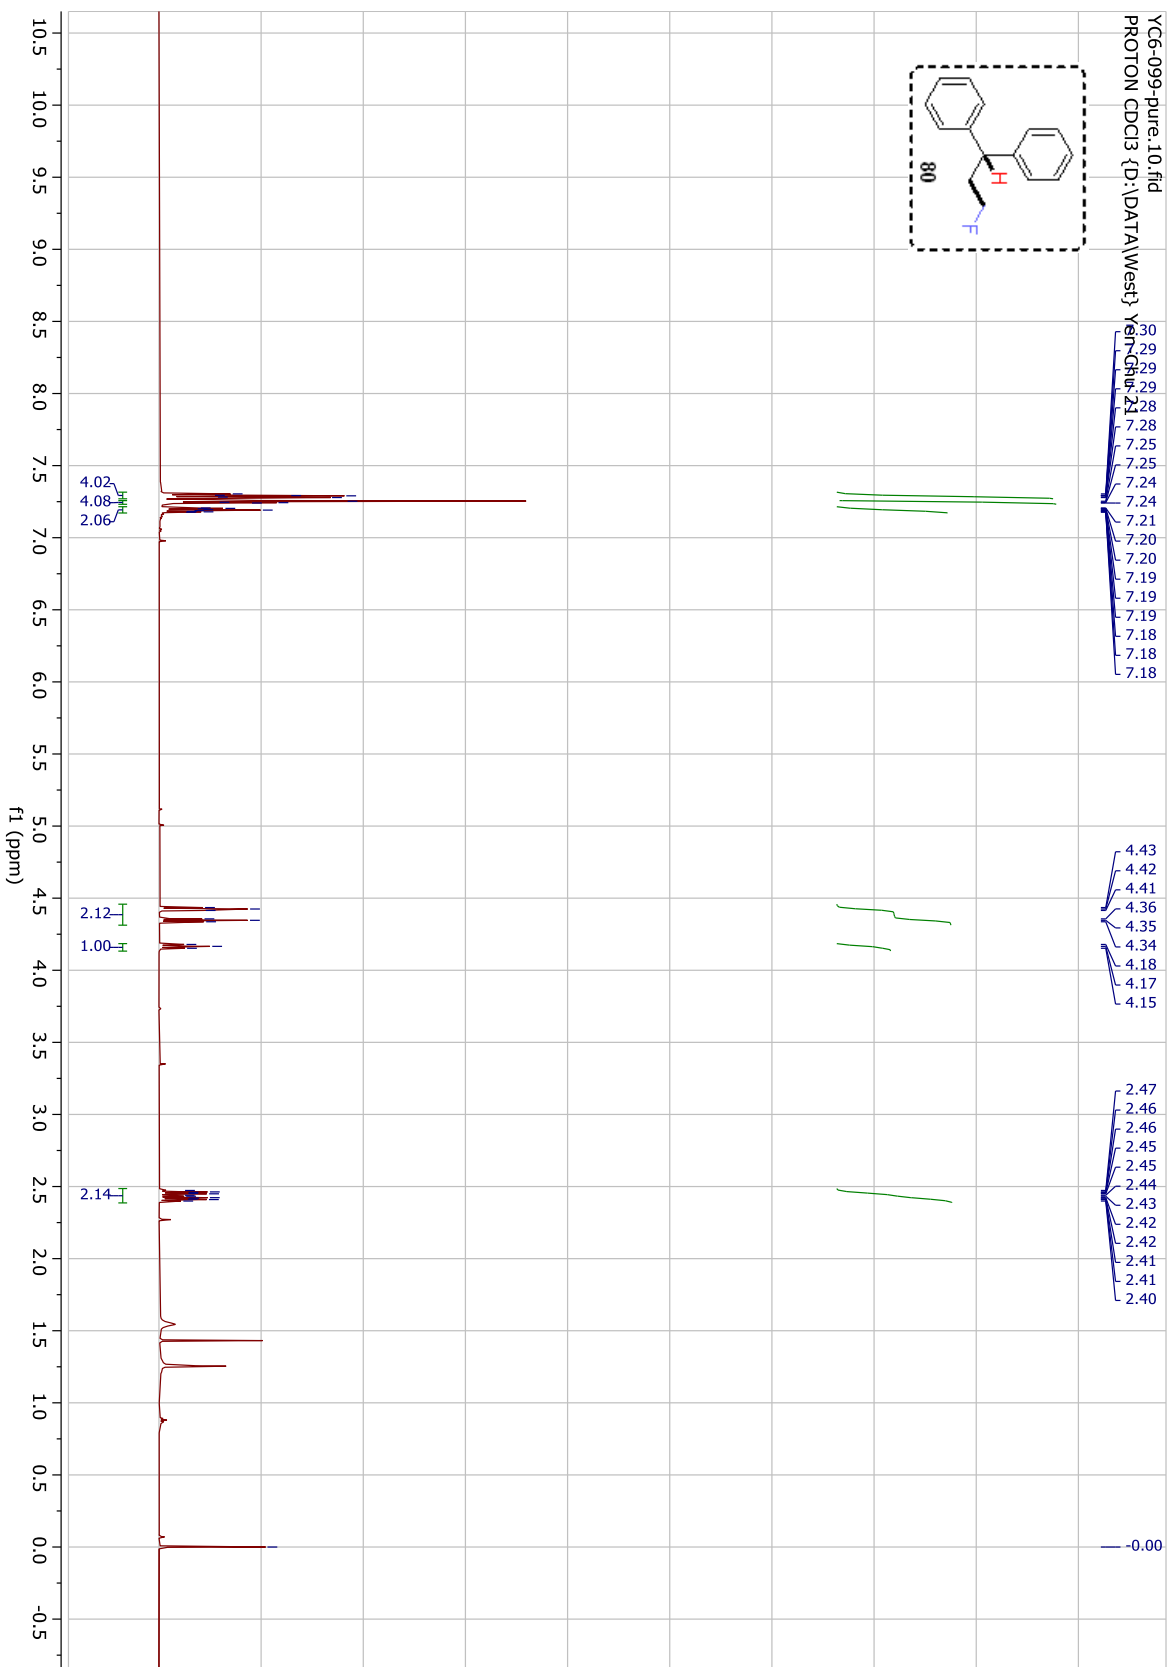

YC6-099-pure1.11.fid  
C13CPD32 CDCl3 {D:\DATA\Westfj-Yen-Chu 21

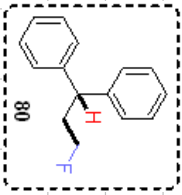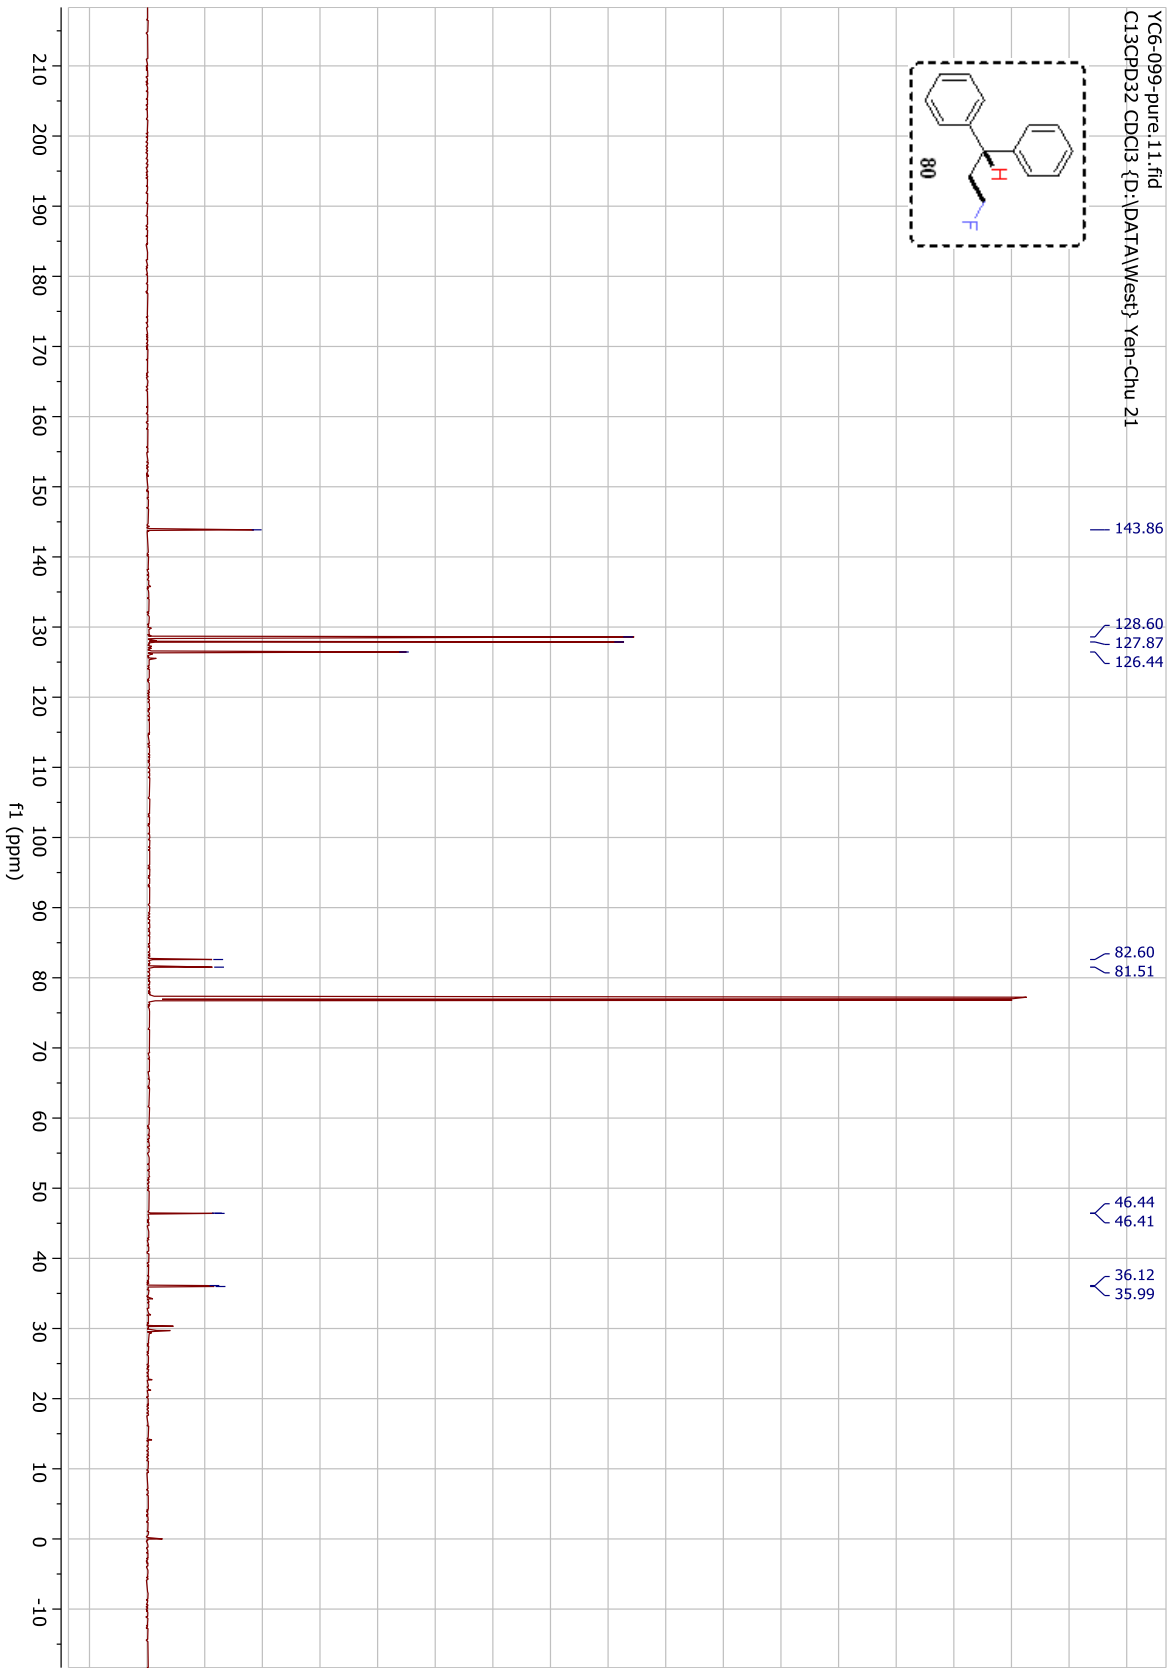

YC6-099-pure.12.fid  
F19\_baseline\_correct ID  
F19\_baseline\_correct CDCI3 {D:\DATA\West} Yen-Chu 21

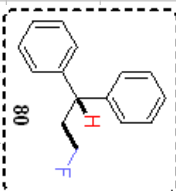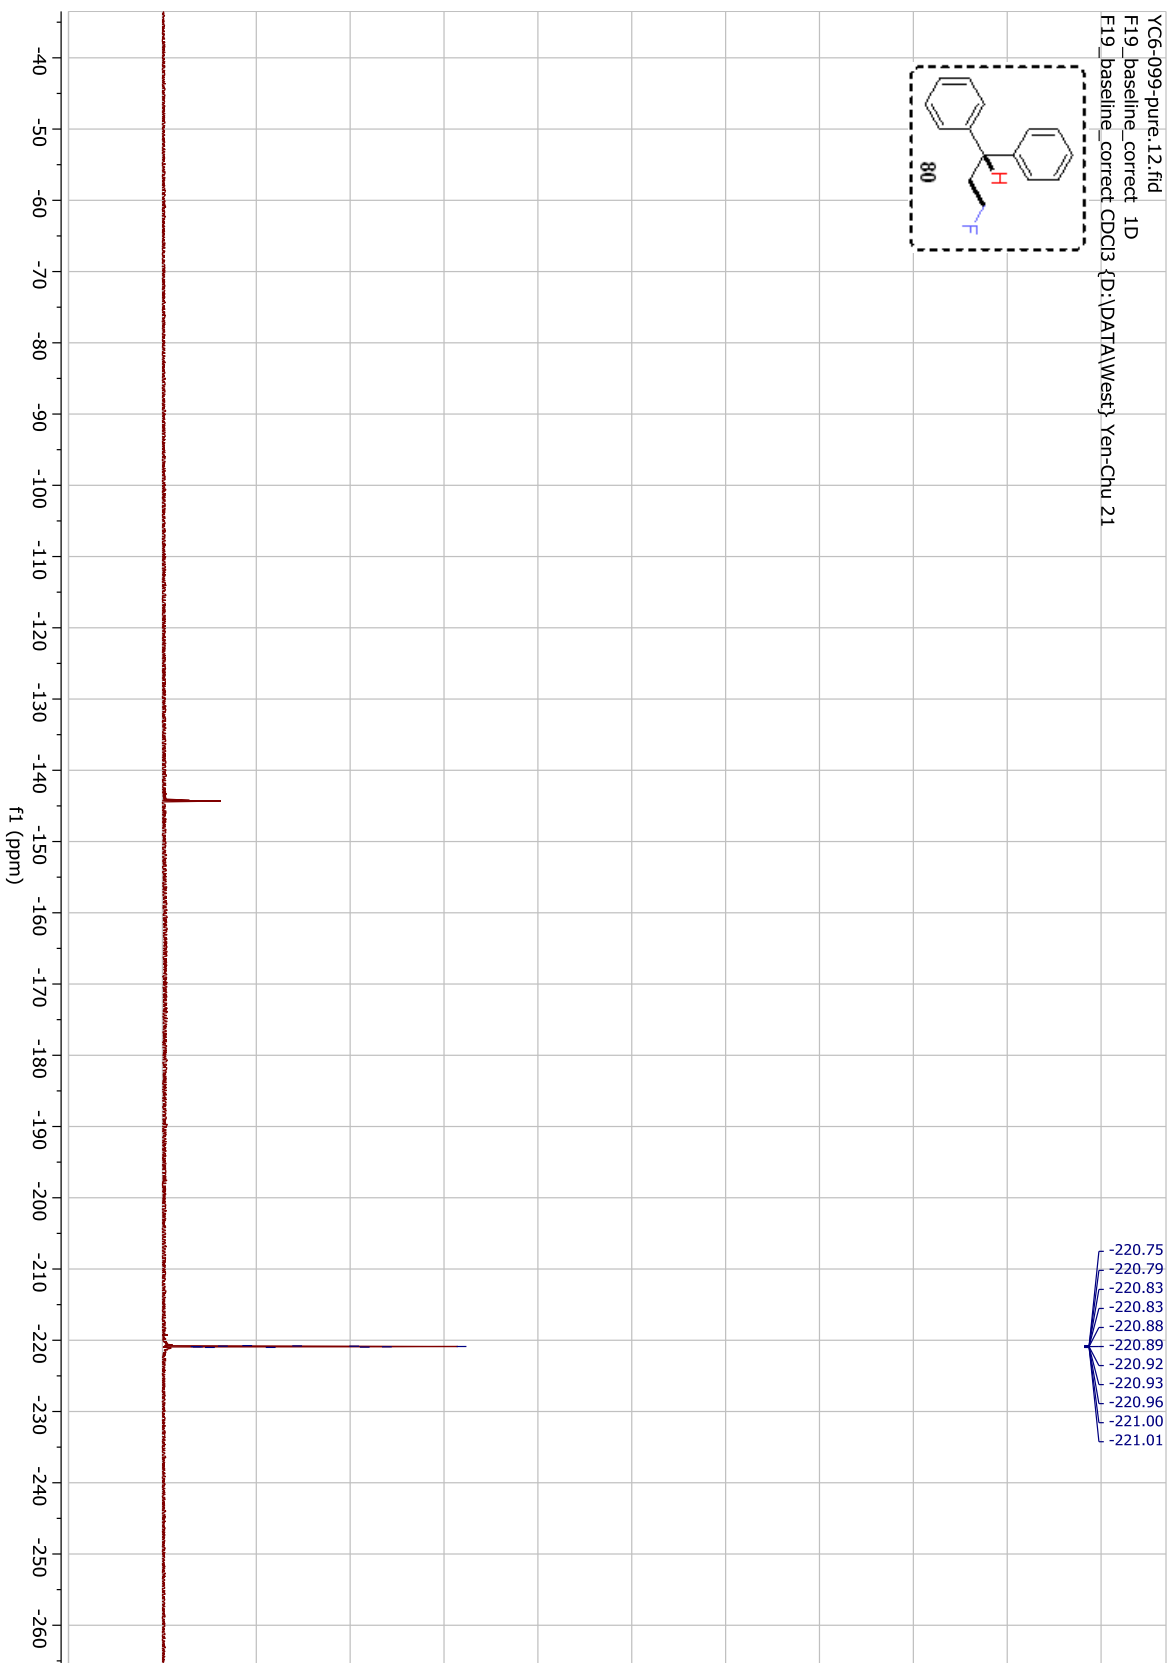

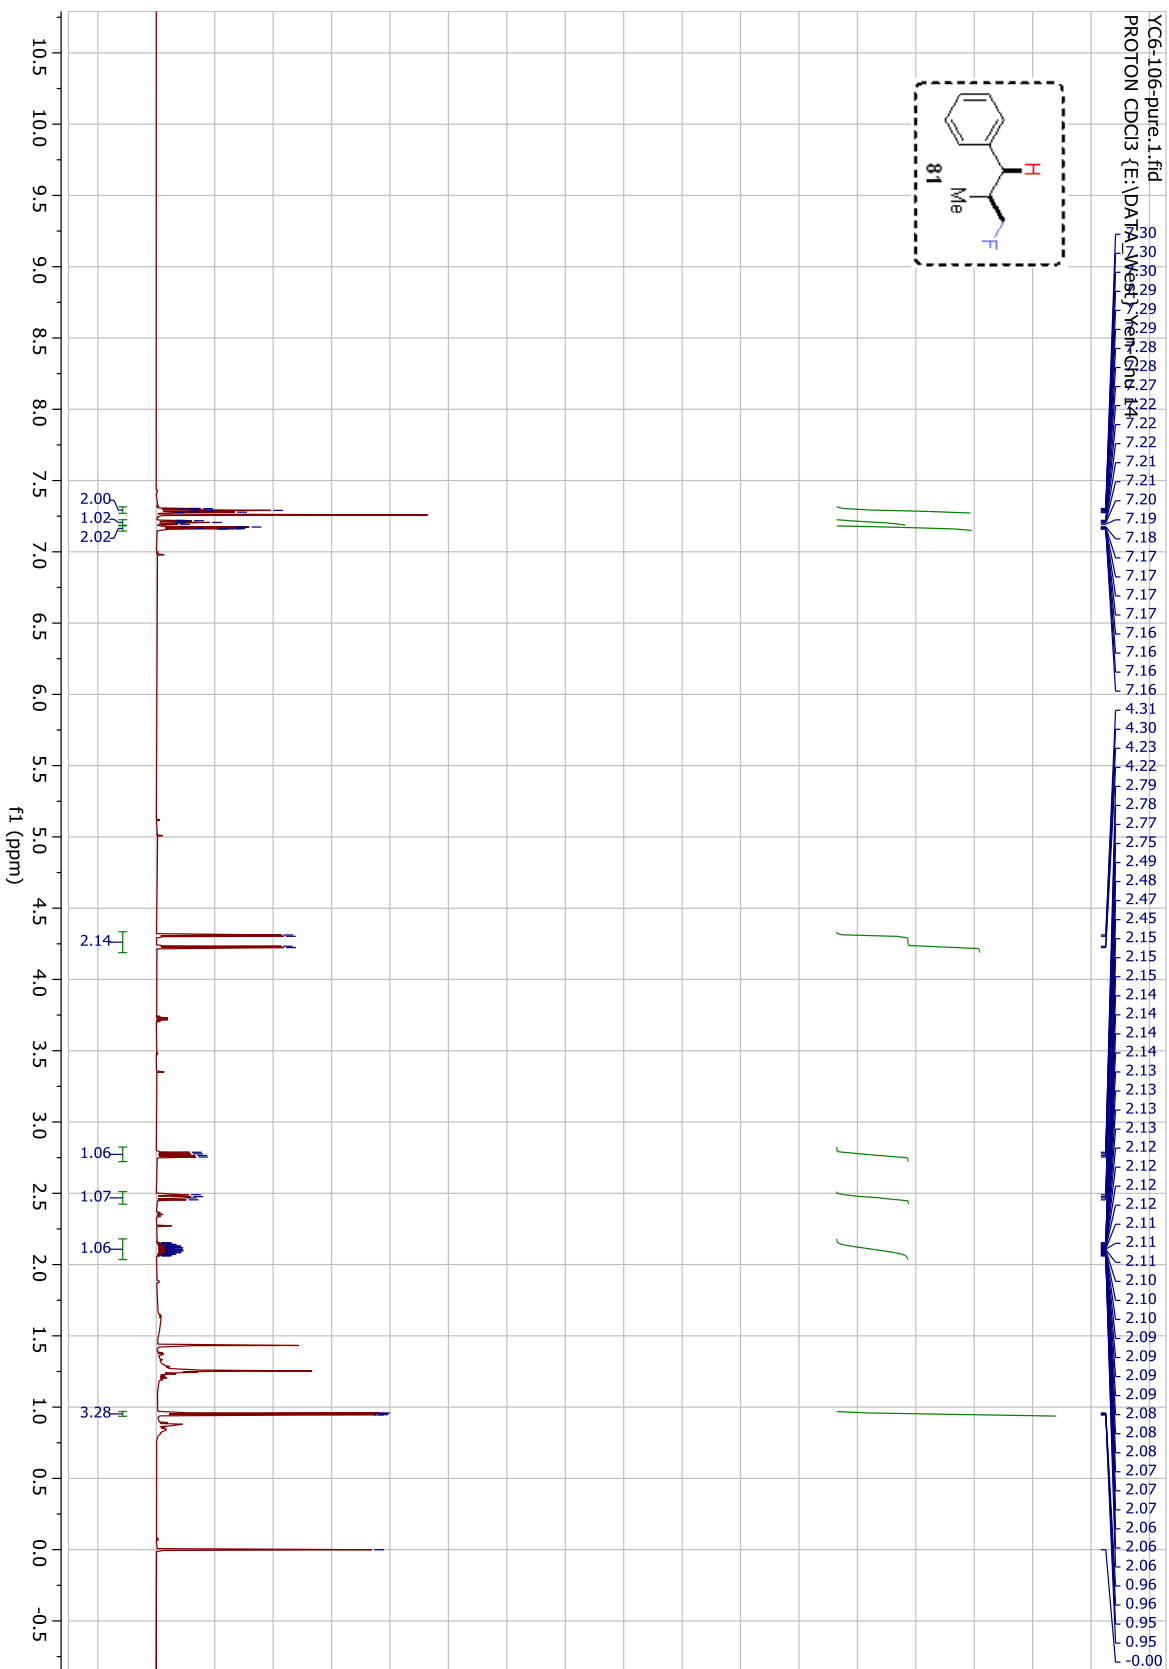

YC6-106-pure.2.fid  
C13CPD32 CDDQ3 {E:\DATA\_Westf\Yen-Chu 14

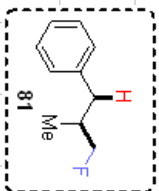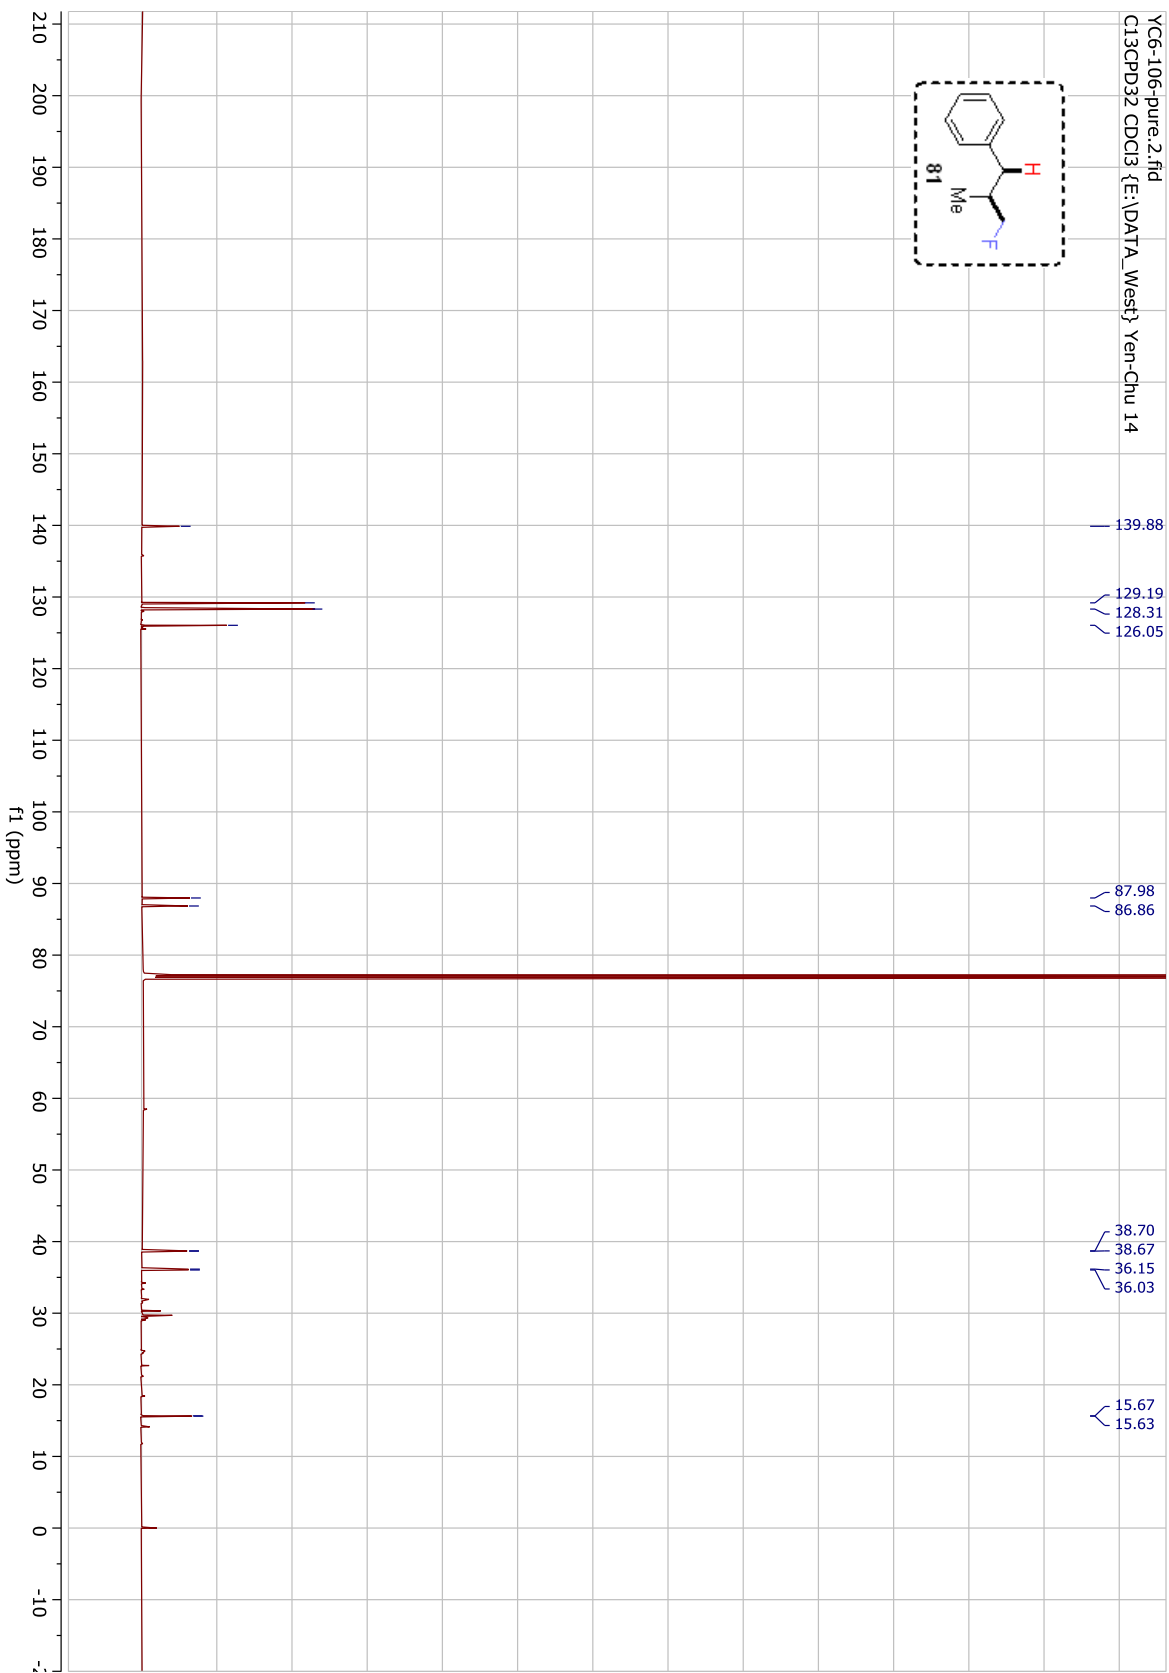

YC6-106-pure.30.fid  
F19\_baseline\_correct\_ID  
F19\_baseline\_correct CDC13 {D:\DATA\West} Yen-Chu 7

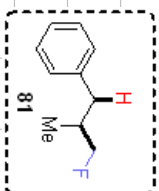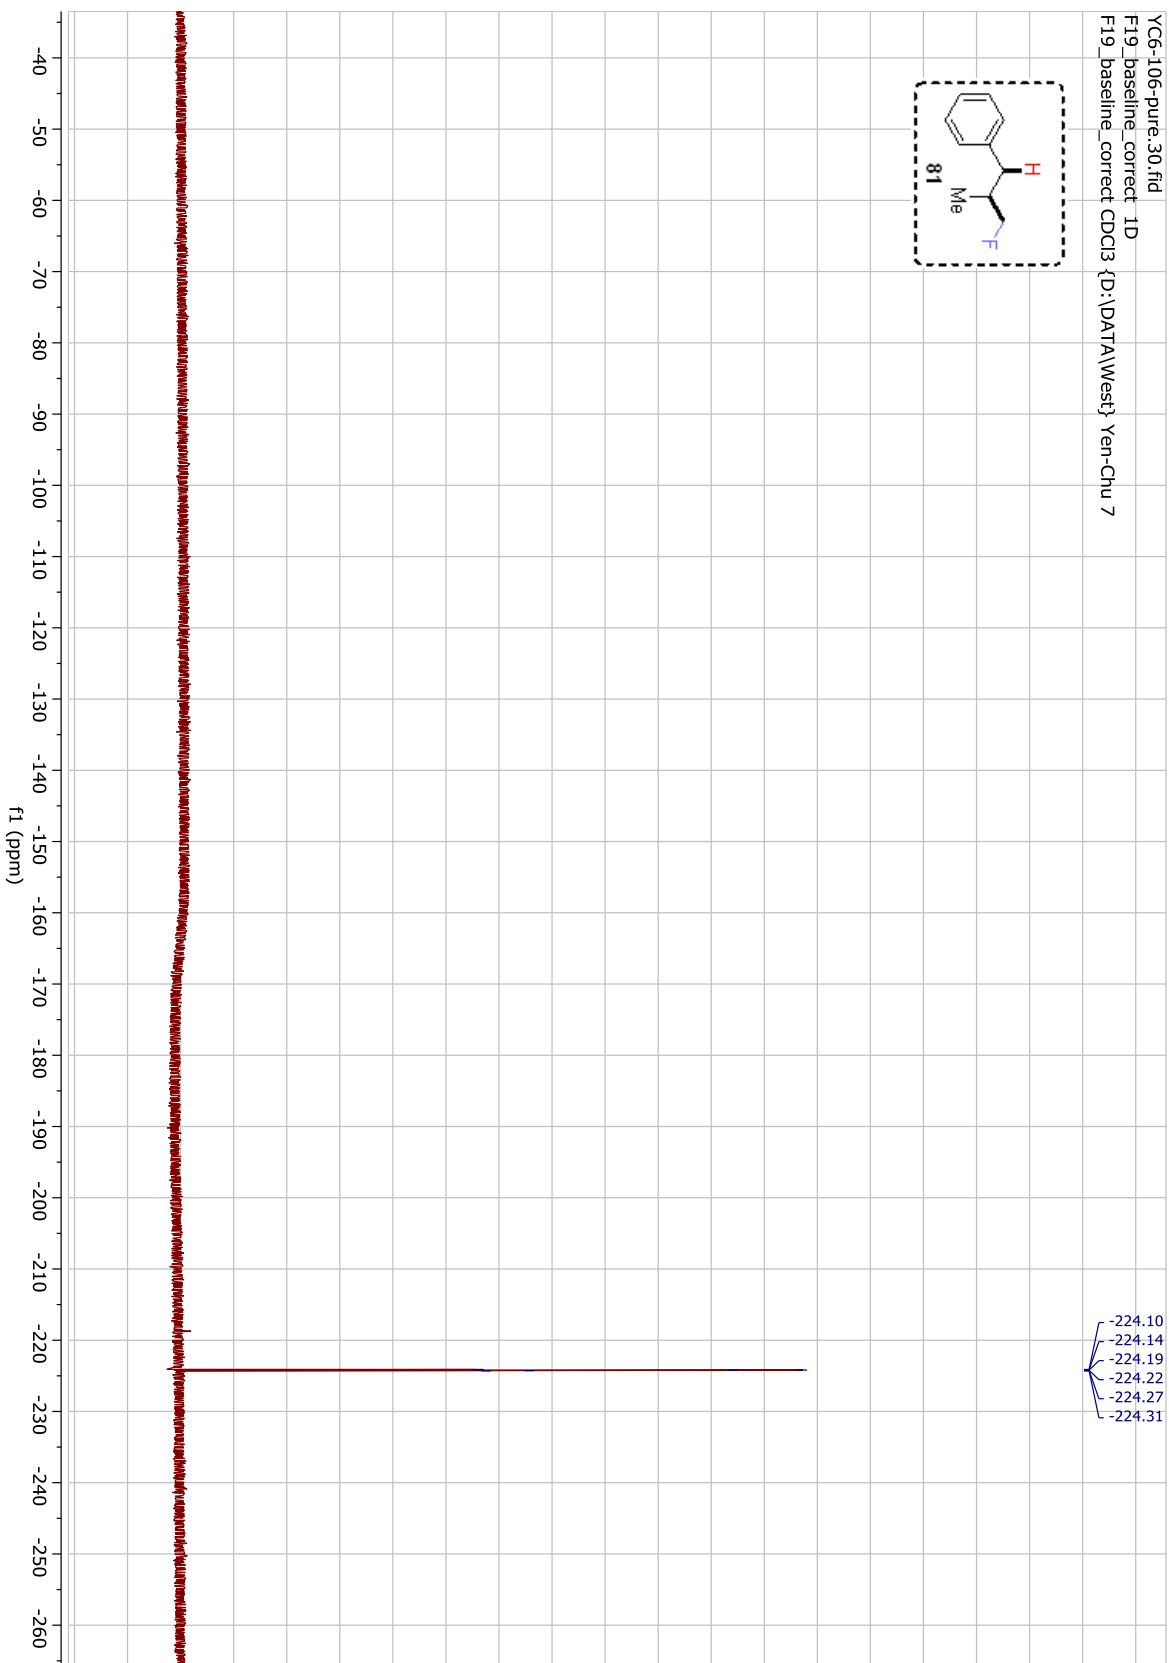

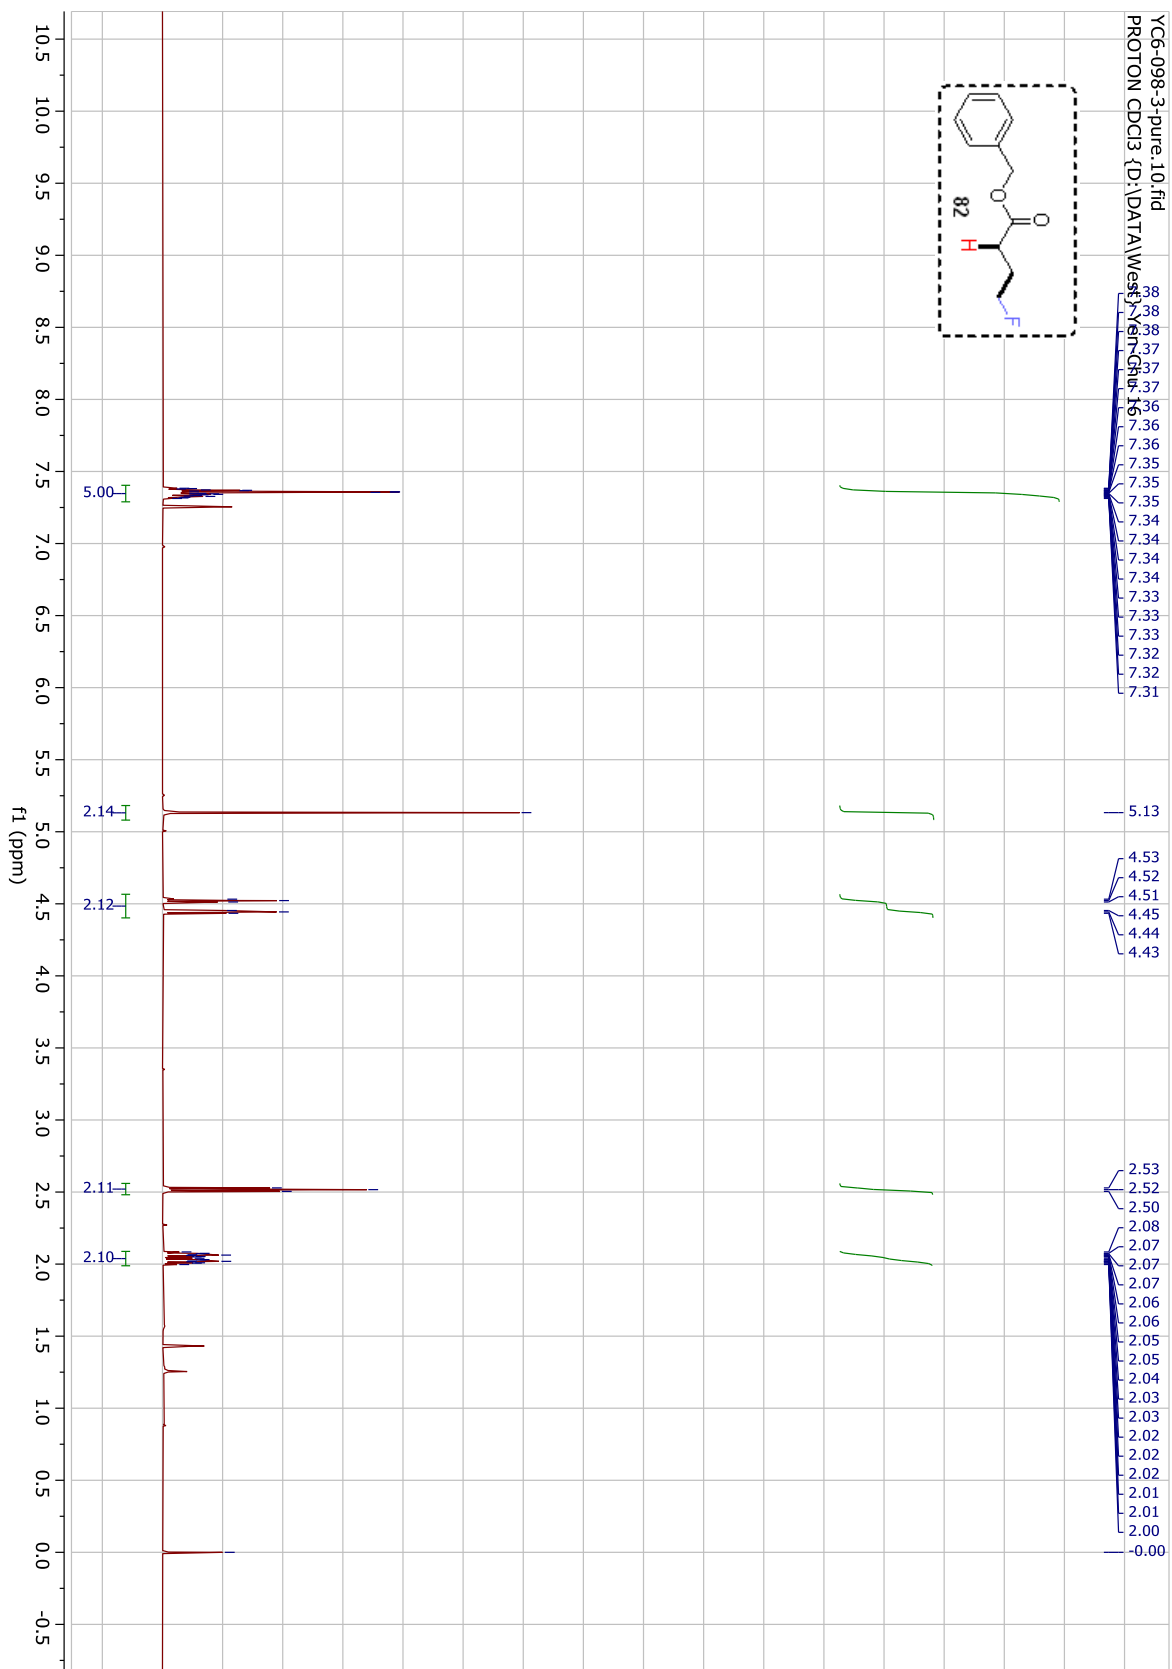



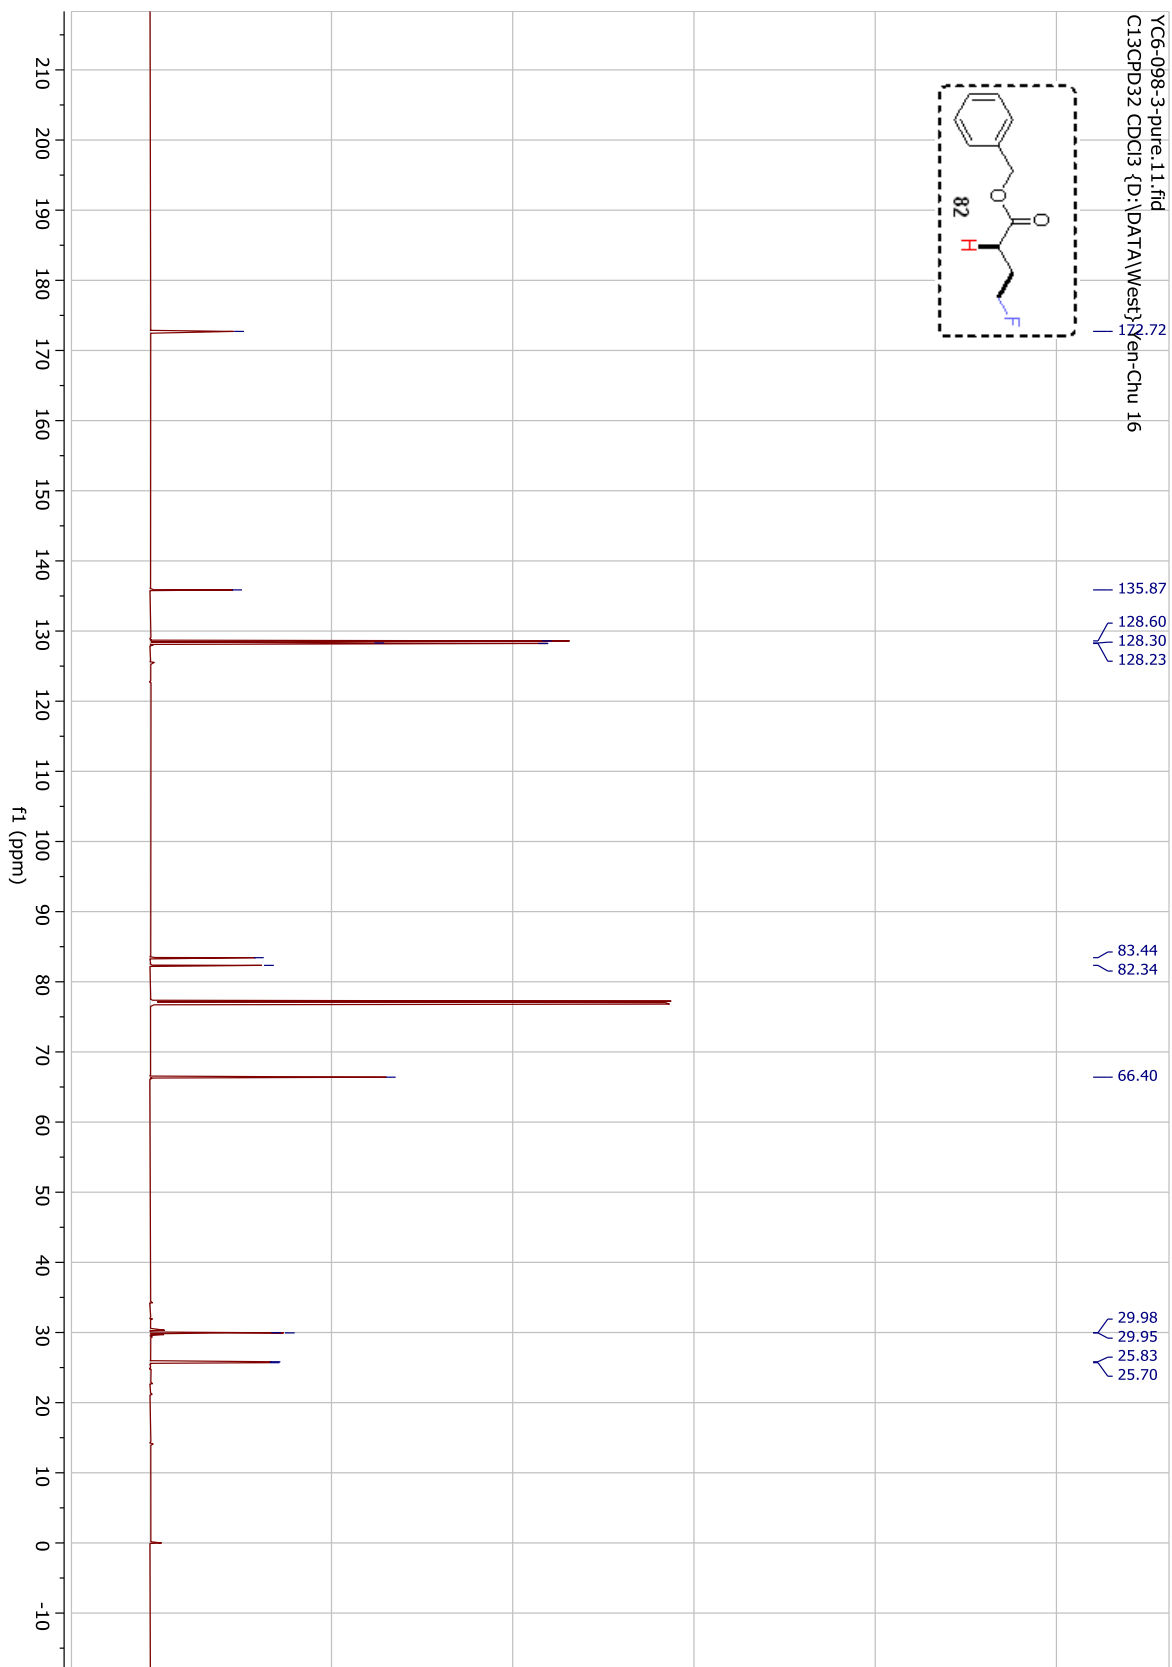

YC6-098-3-pure.12.fid  
F19\_baseline\_correct 1D  
F19\_baseline\_correct CDC13 {D:\DATA\West\} Yen-Chu 16

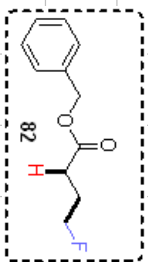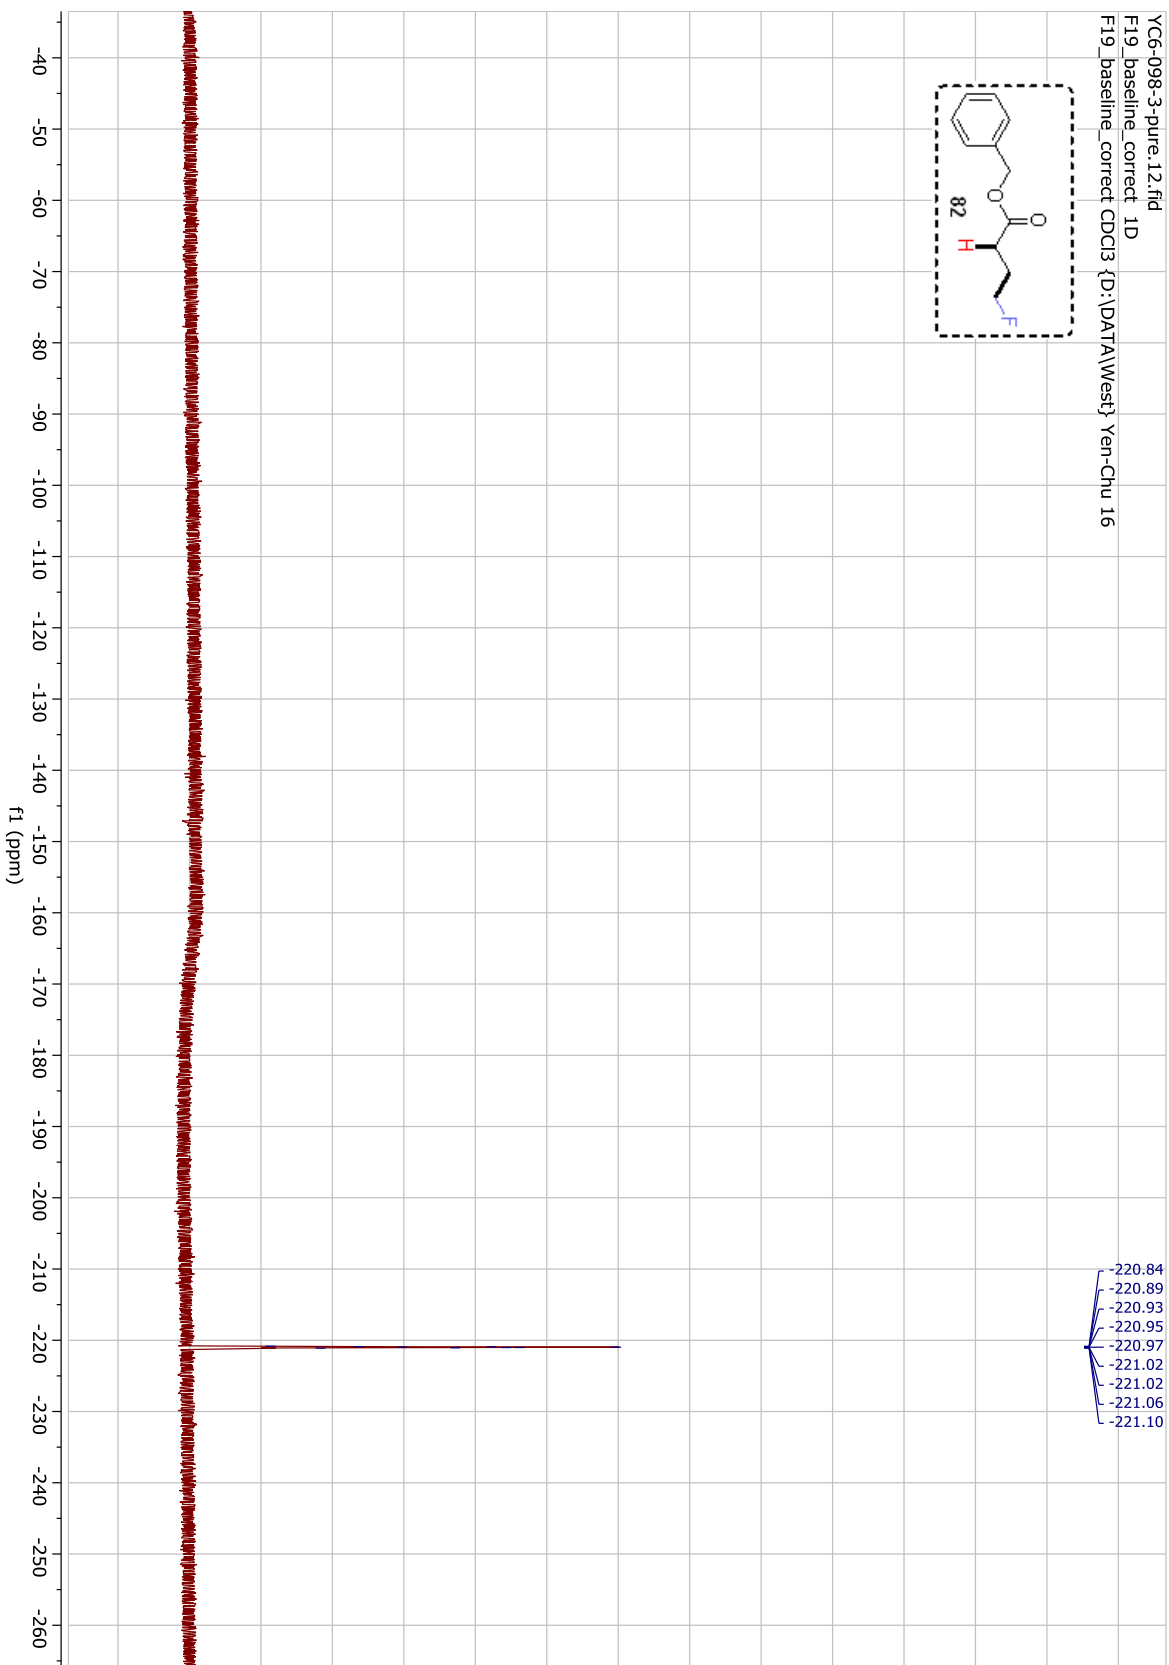

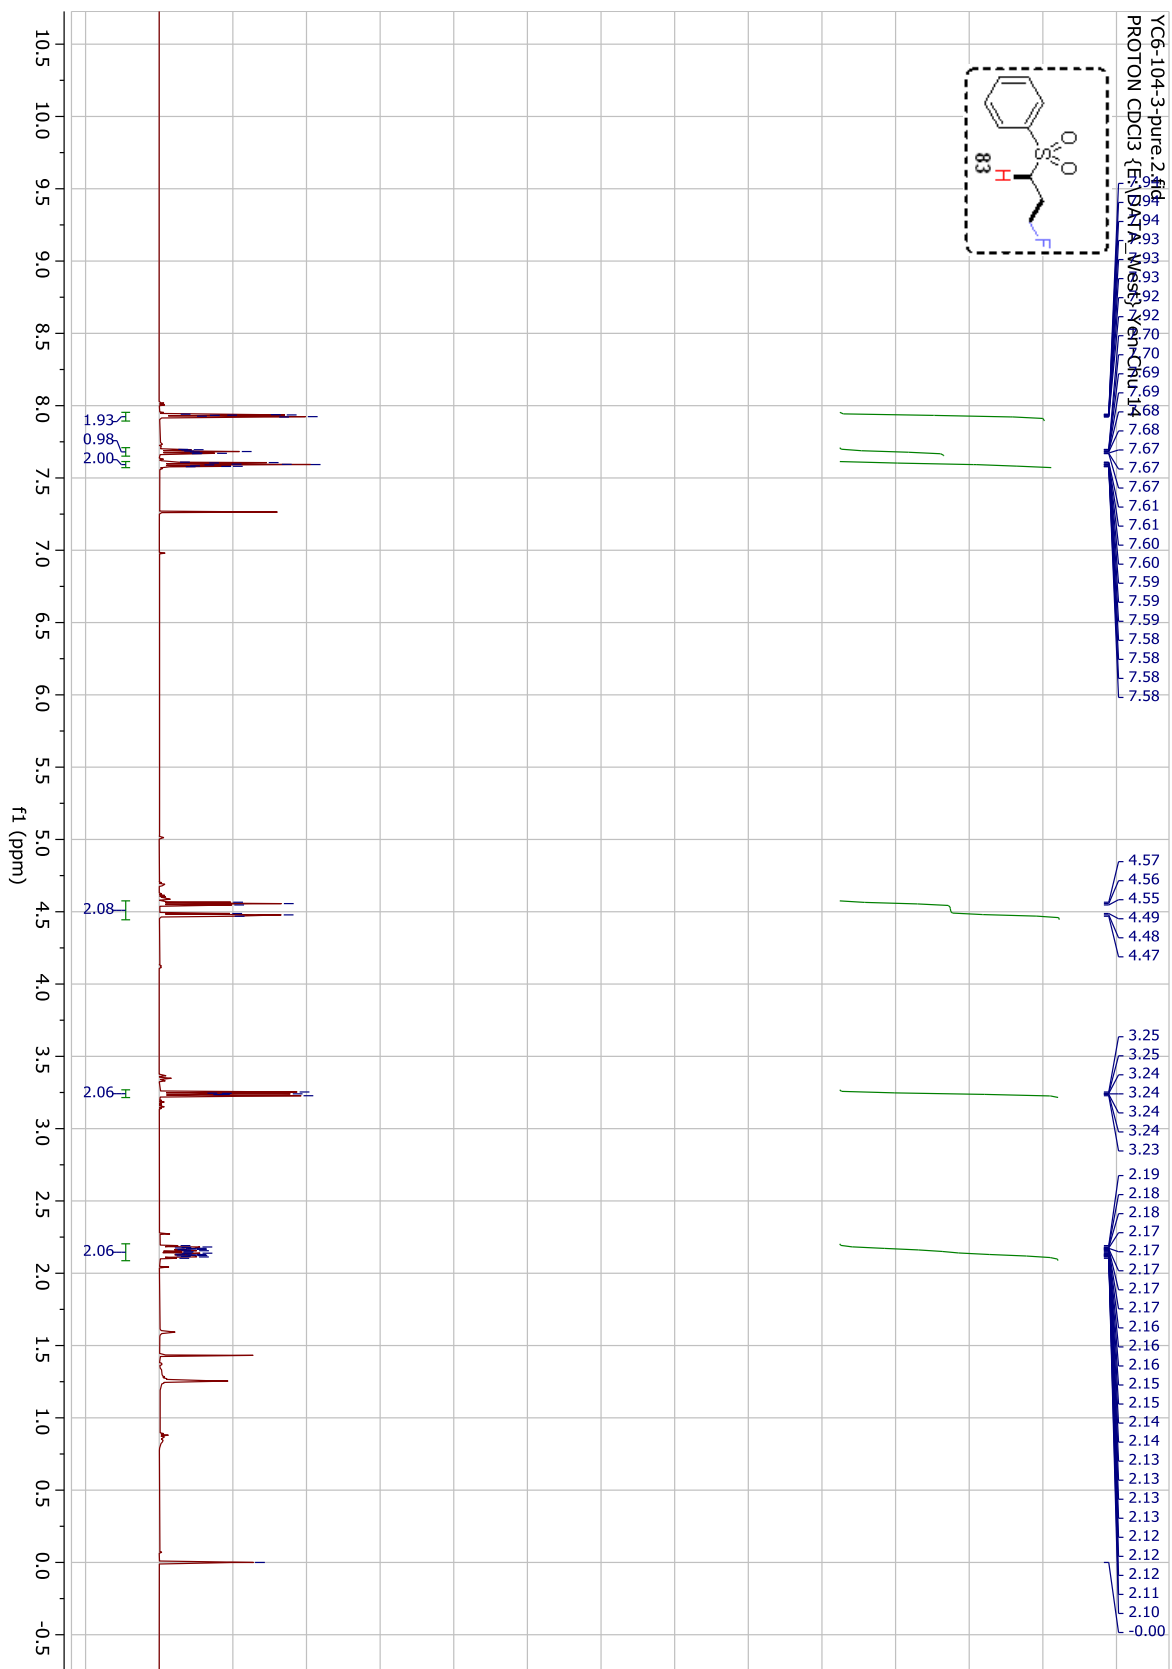

YC6-104-3-pure.10.fid  
C13CPD32 CDCl3 {D:\DATA\Westf}\Yen-Chu 2

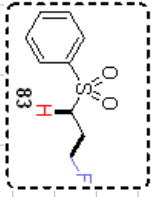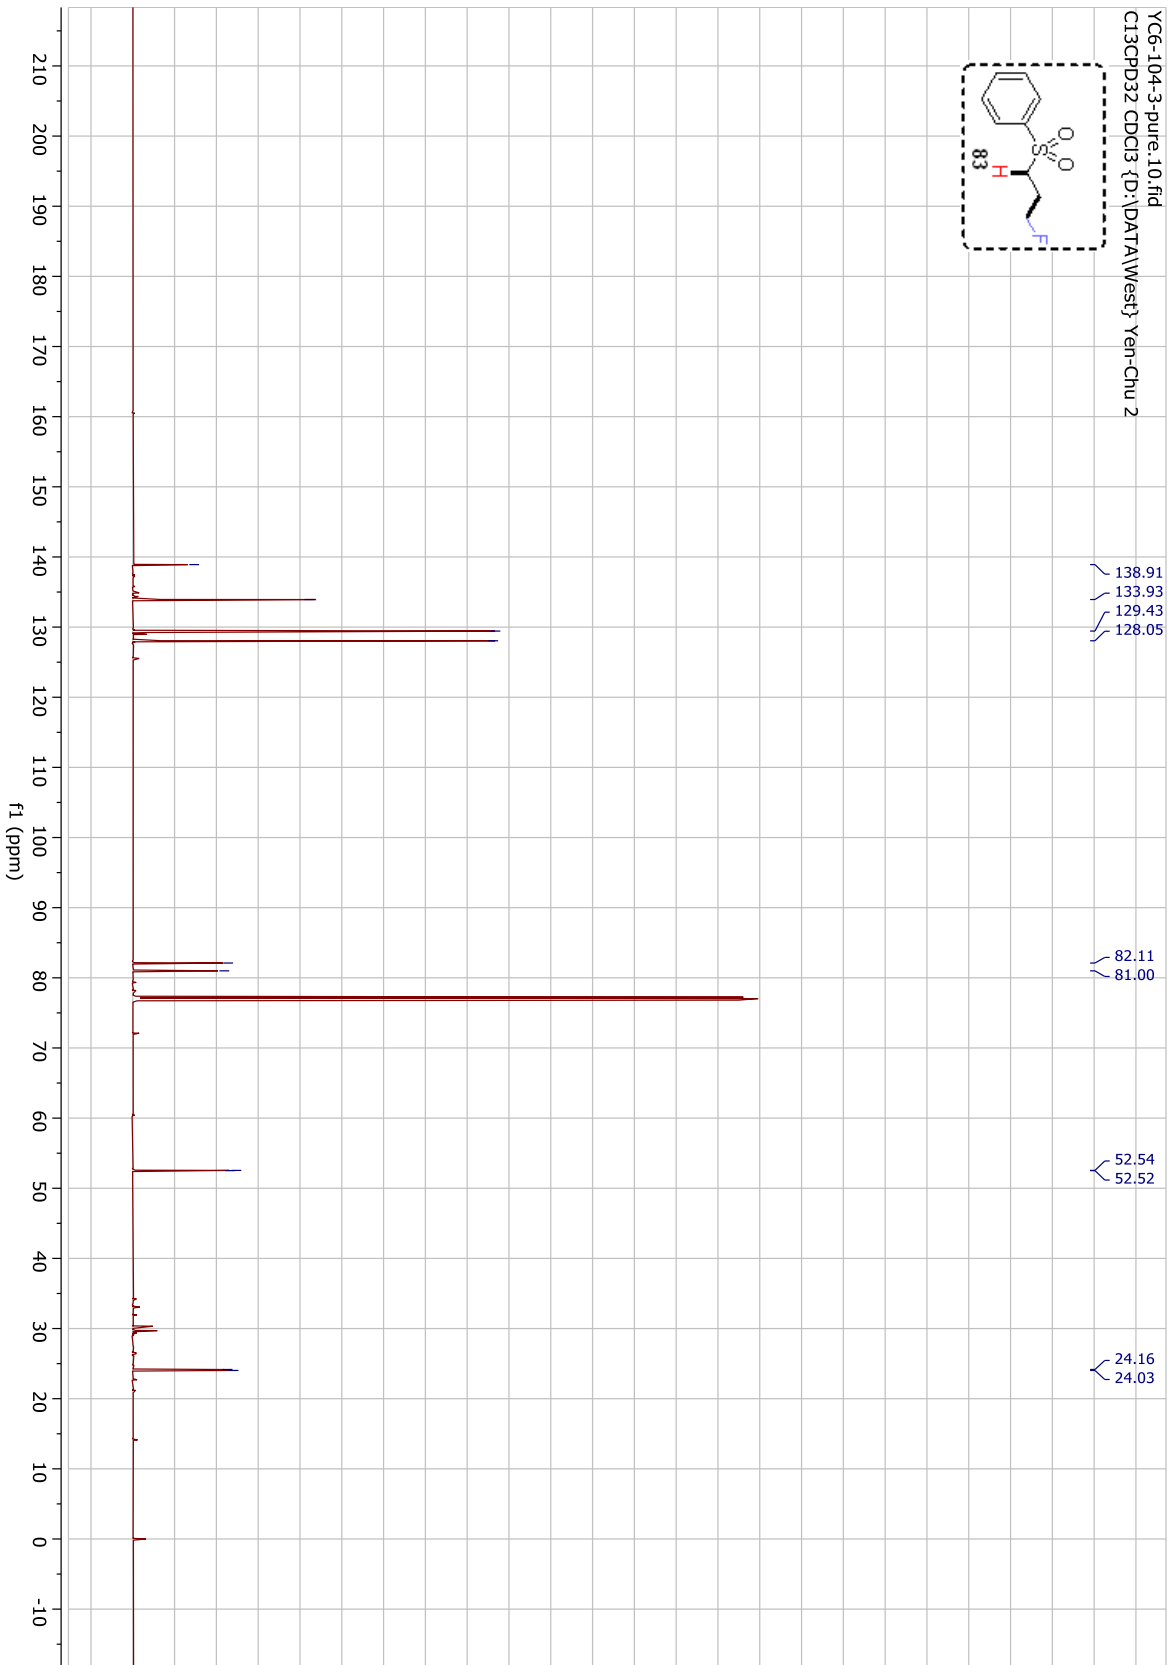

YC6-104-3-pure.11.fid  
F19\_baseline\_correct\_1D  
F19\_17333 {D:\DATA\West} Yen-Chu 2

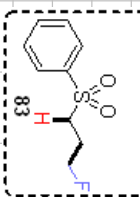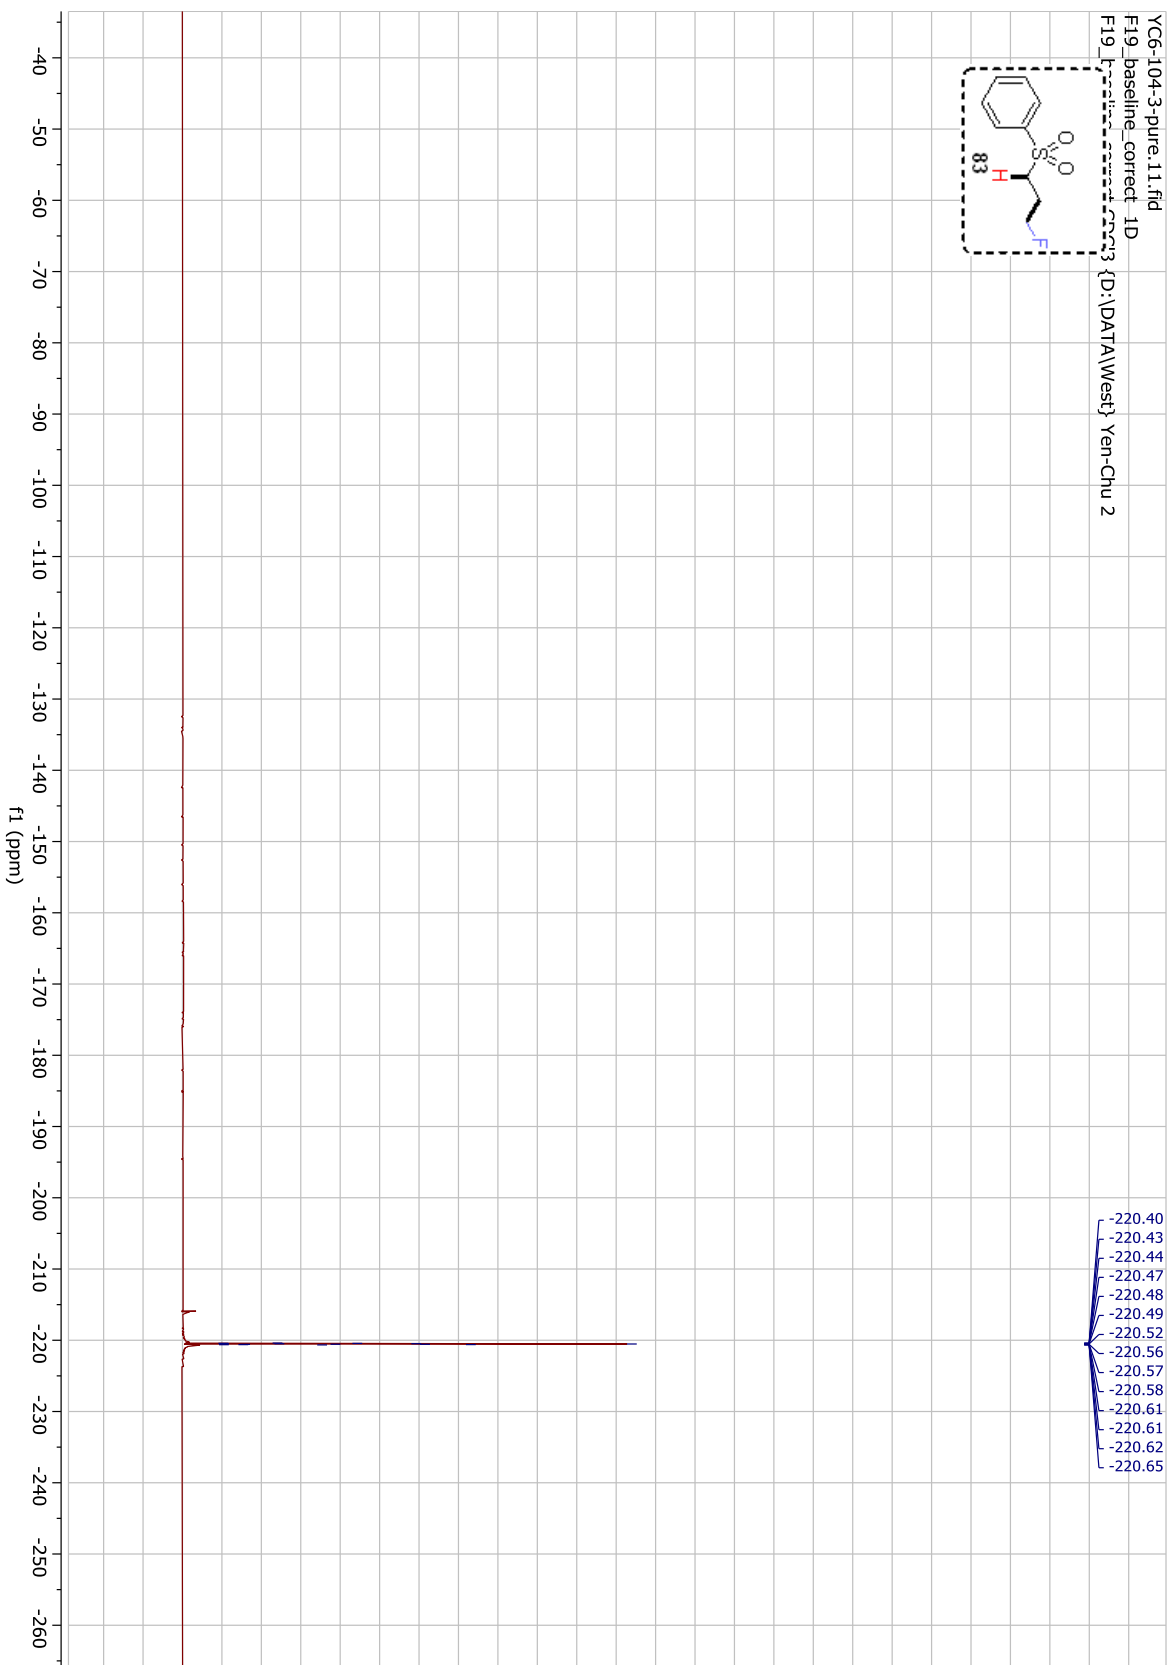

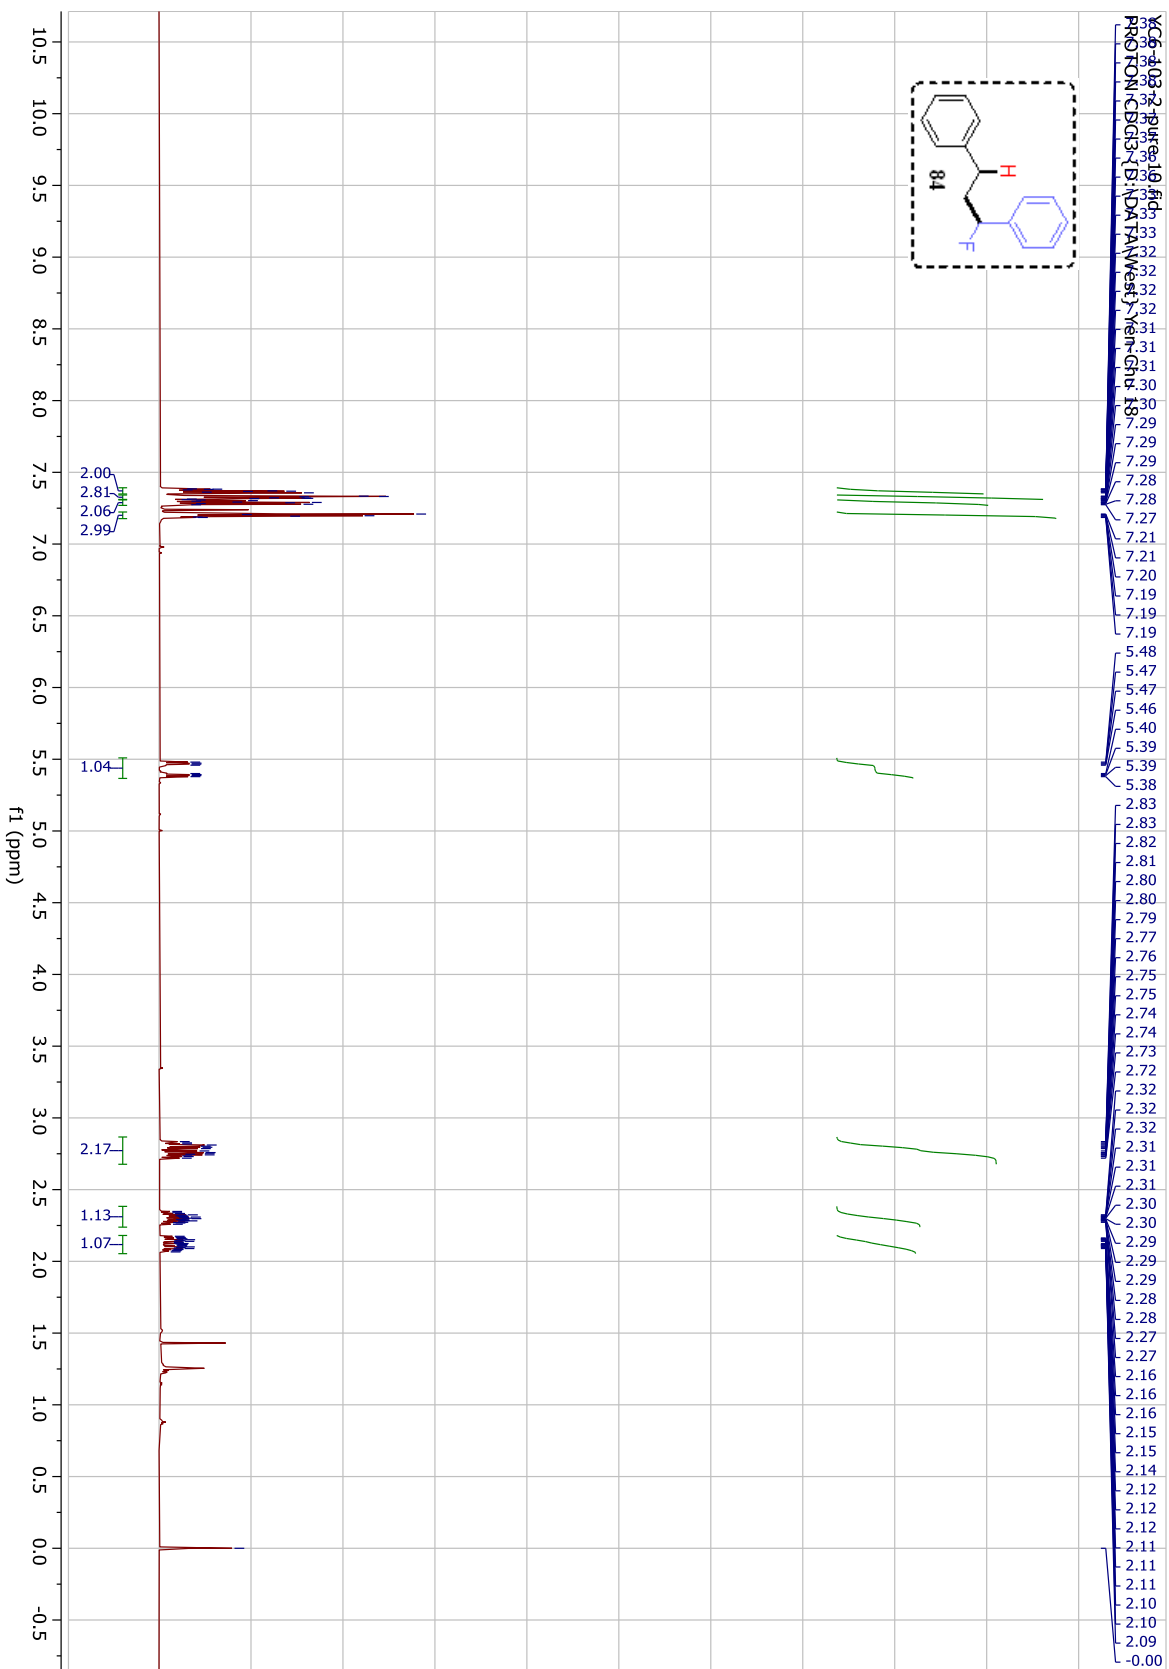

YC6-103-2-pure.11.fid  
C13CPD32 CDCl3 {D:\DATA\West}\Yen-Chu 18

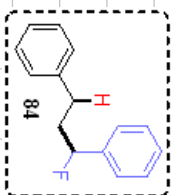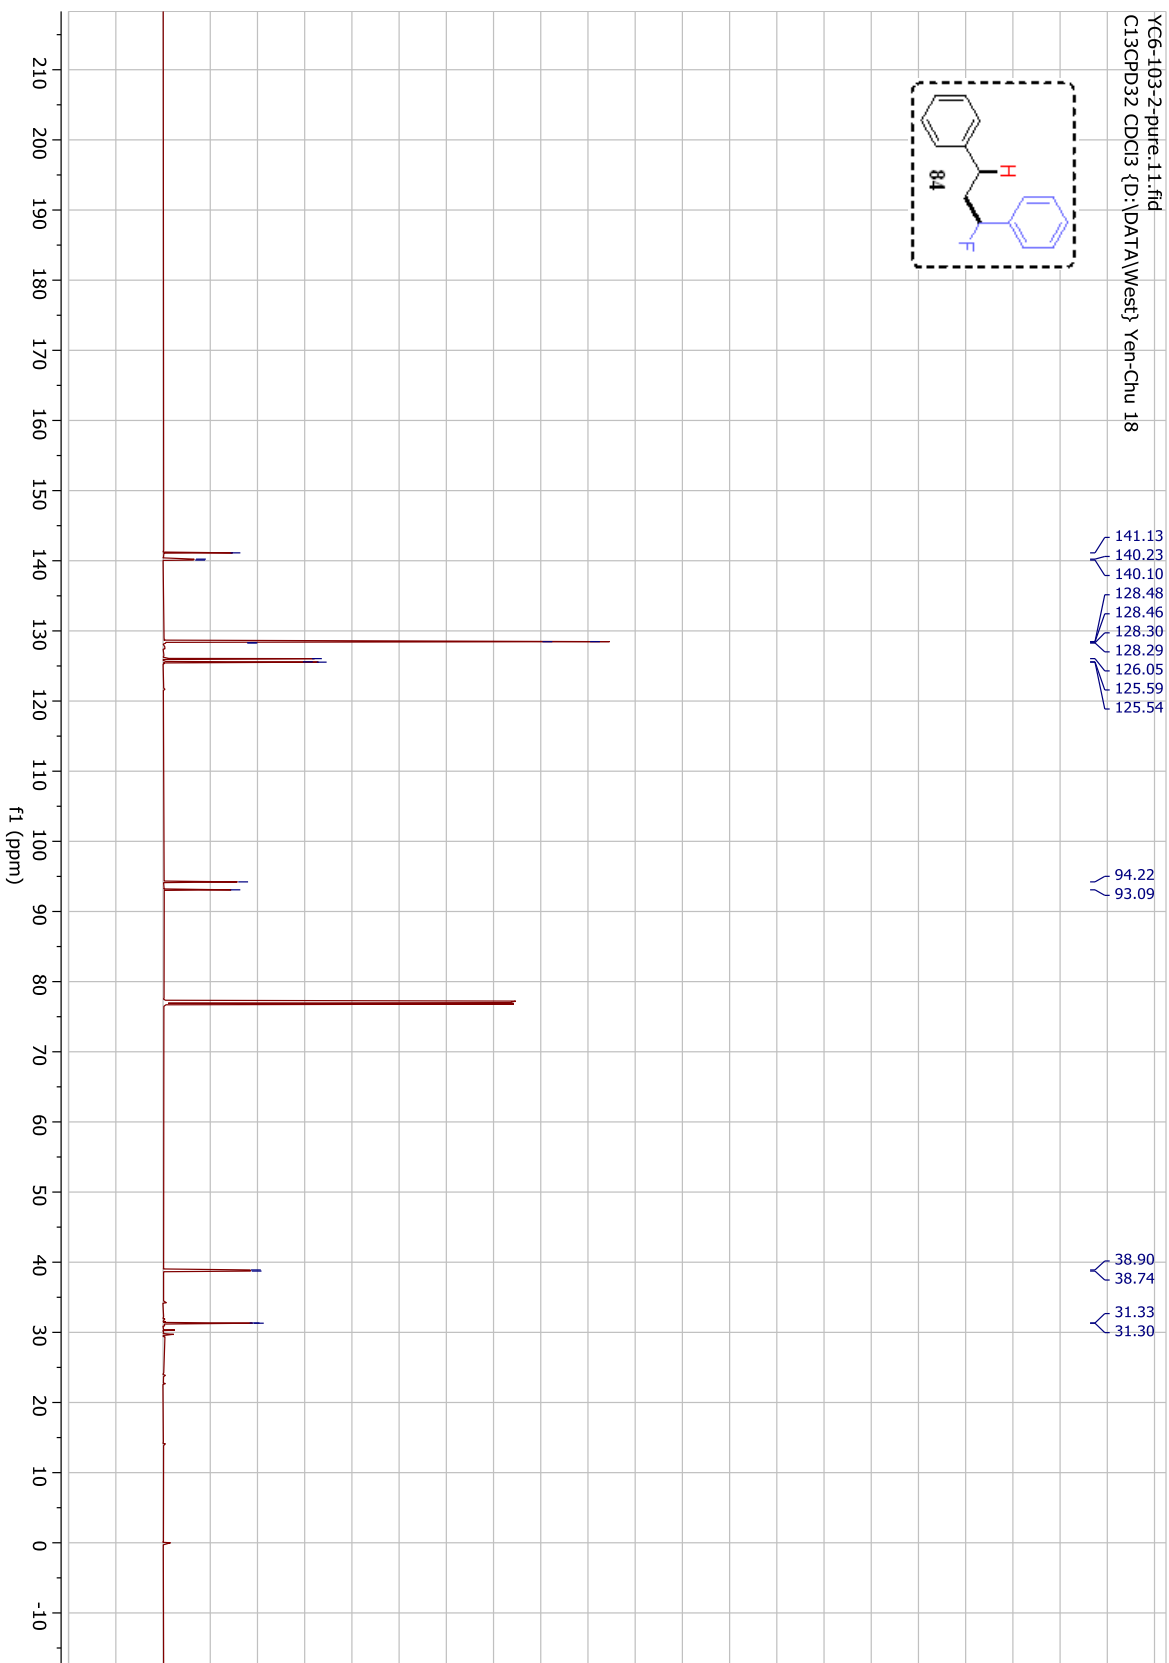

YC6-103-2-pure.12.ftd  
F19\_baseline\_correct ID  
F19\_baseline\_correct CDCI3 {D:\DATA\West} Yen-Chu 18

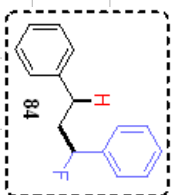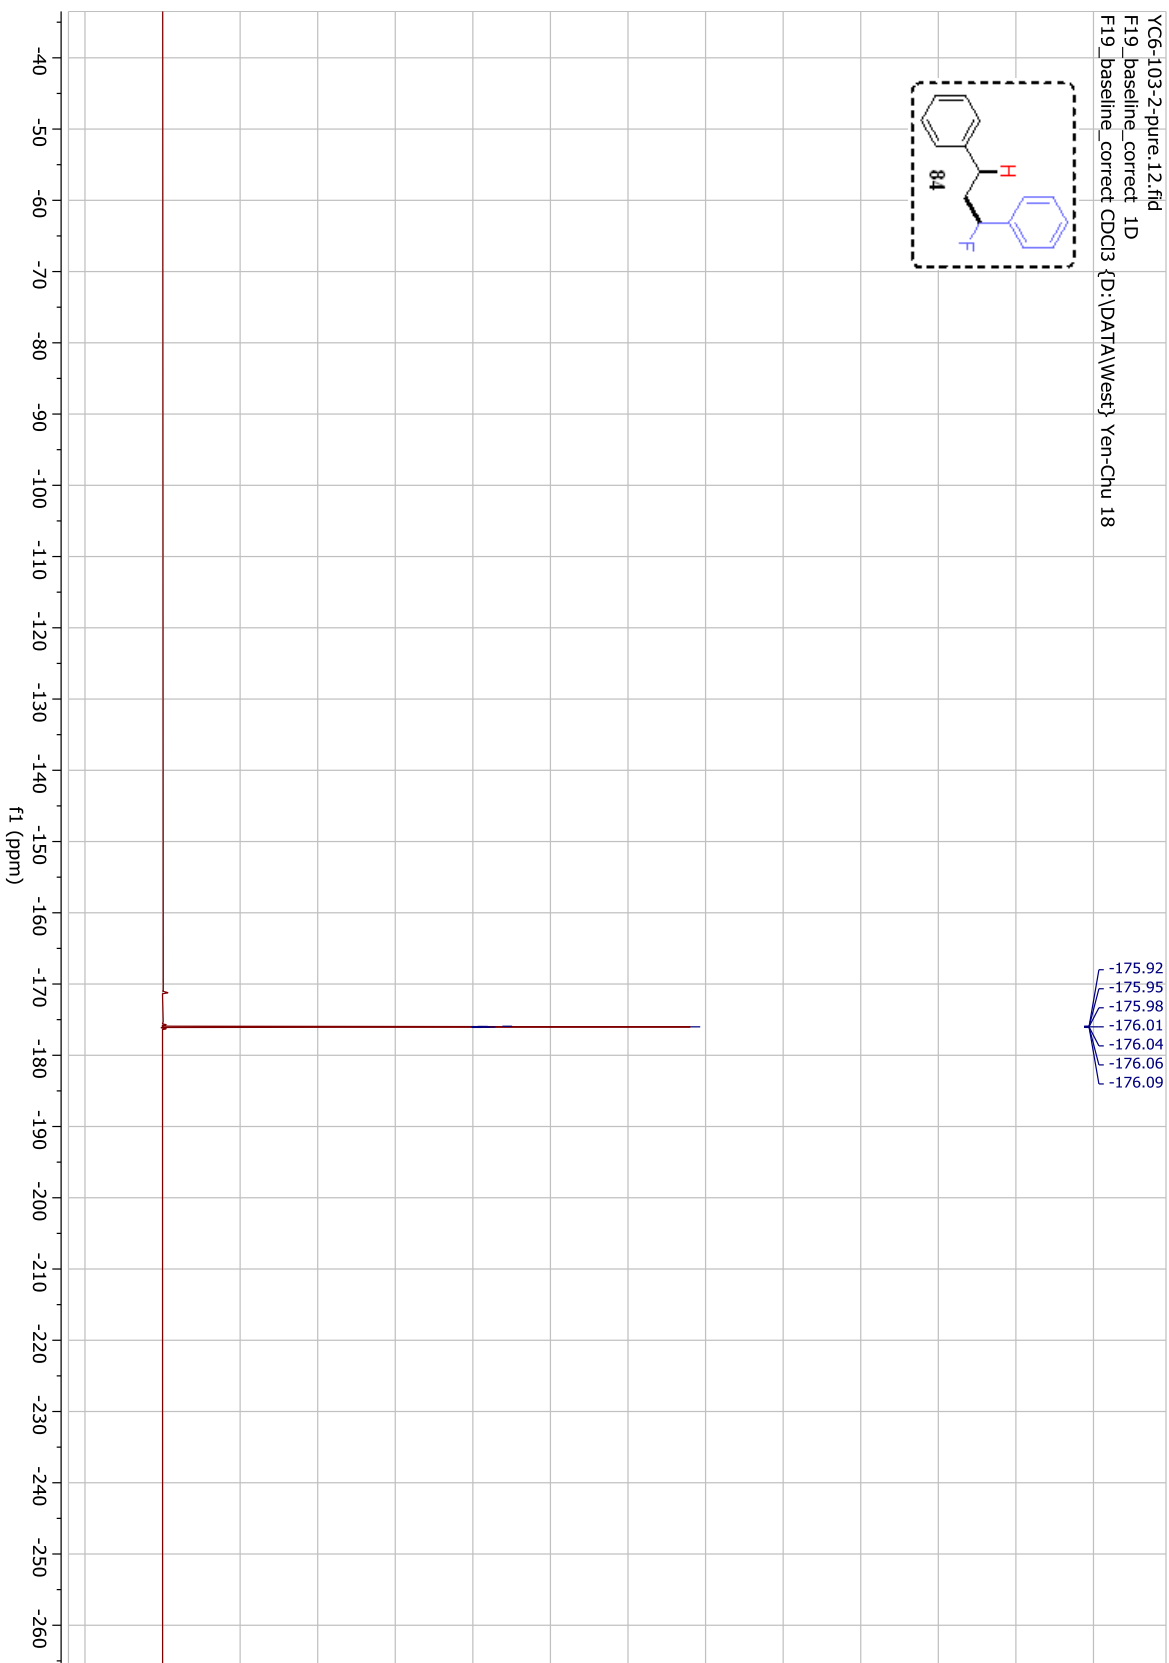



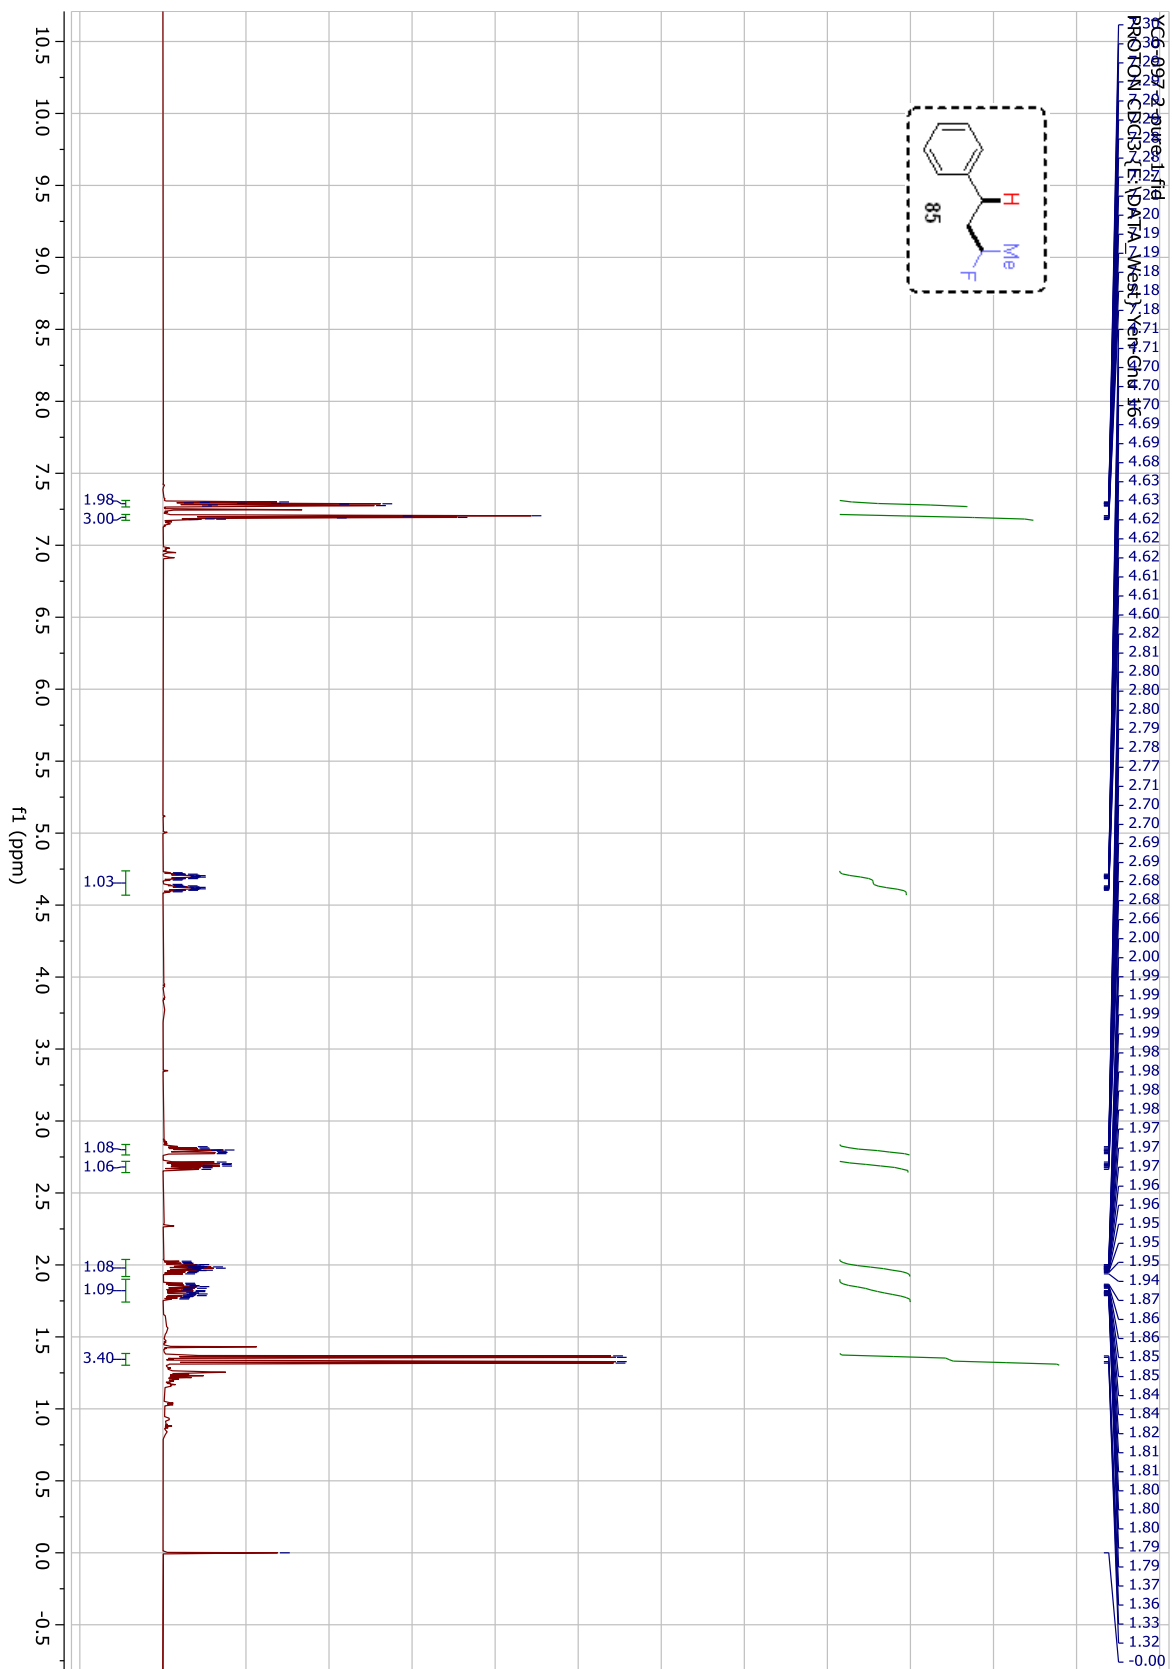

YC6-097-2-pure.11.fid  
C13CPD32 CDCl3 {D:\DATA\West}\Yen-Chu 2

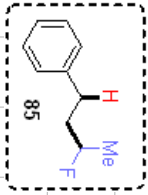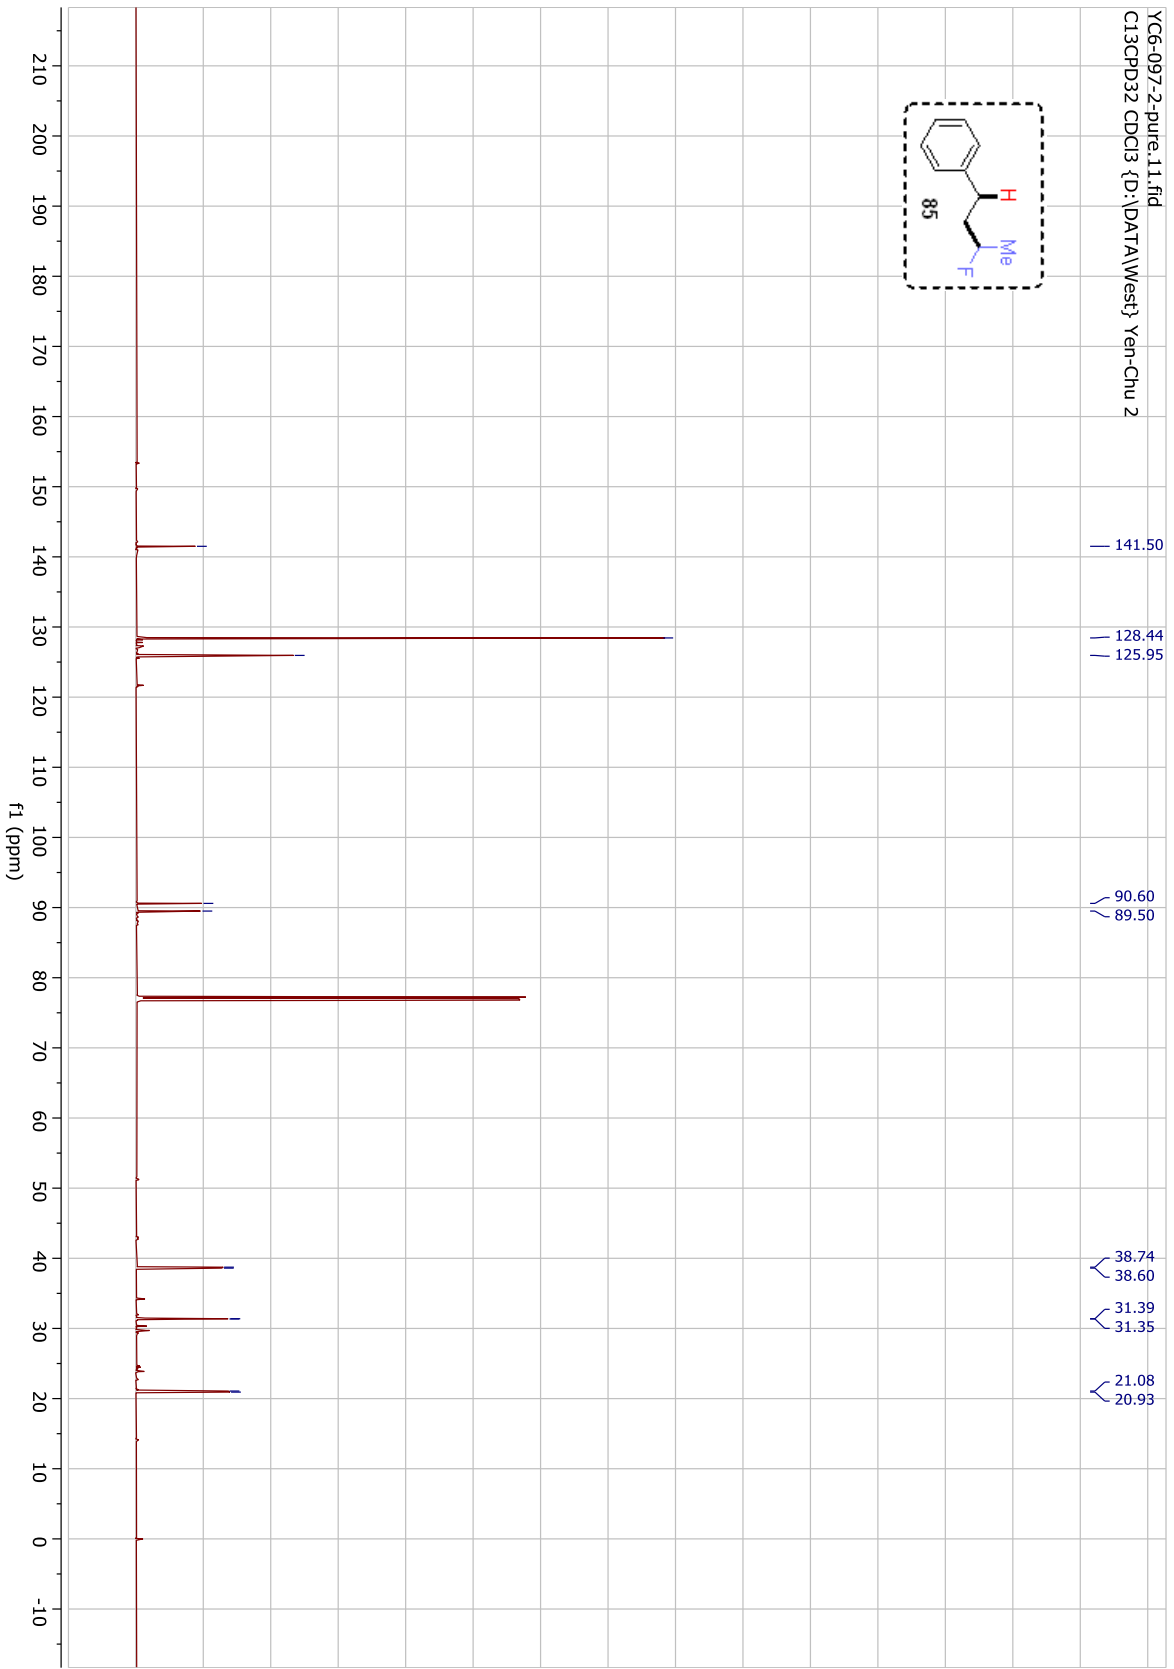

YC6-097-2-pure.12.fid  
F19\_baseline\_correct ID  
F19\_baseline\_correct CDCl3 {D:\DATA\West\ Yen-Chu 2

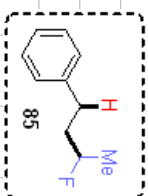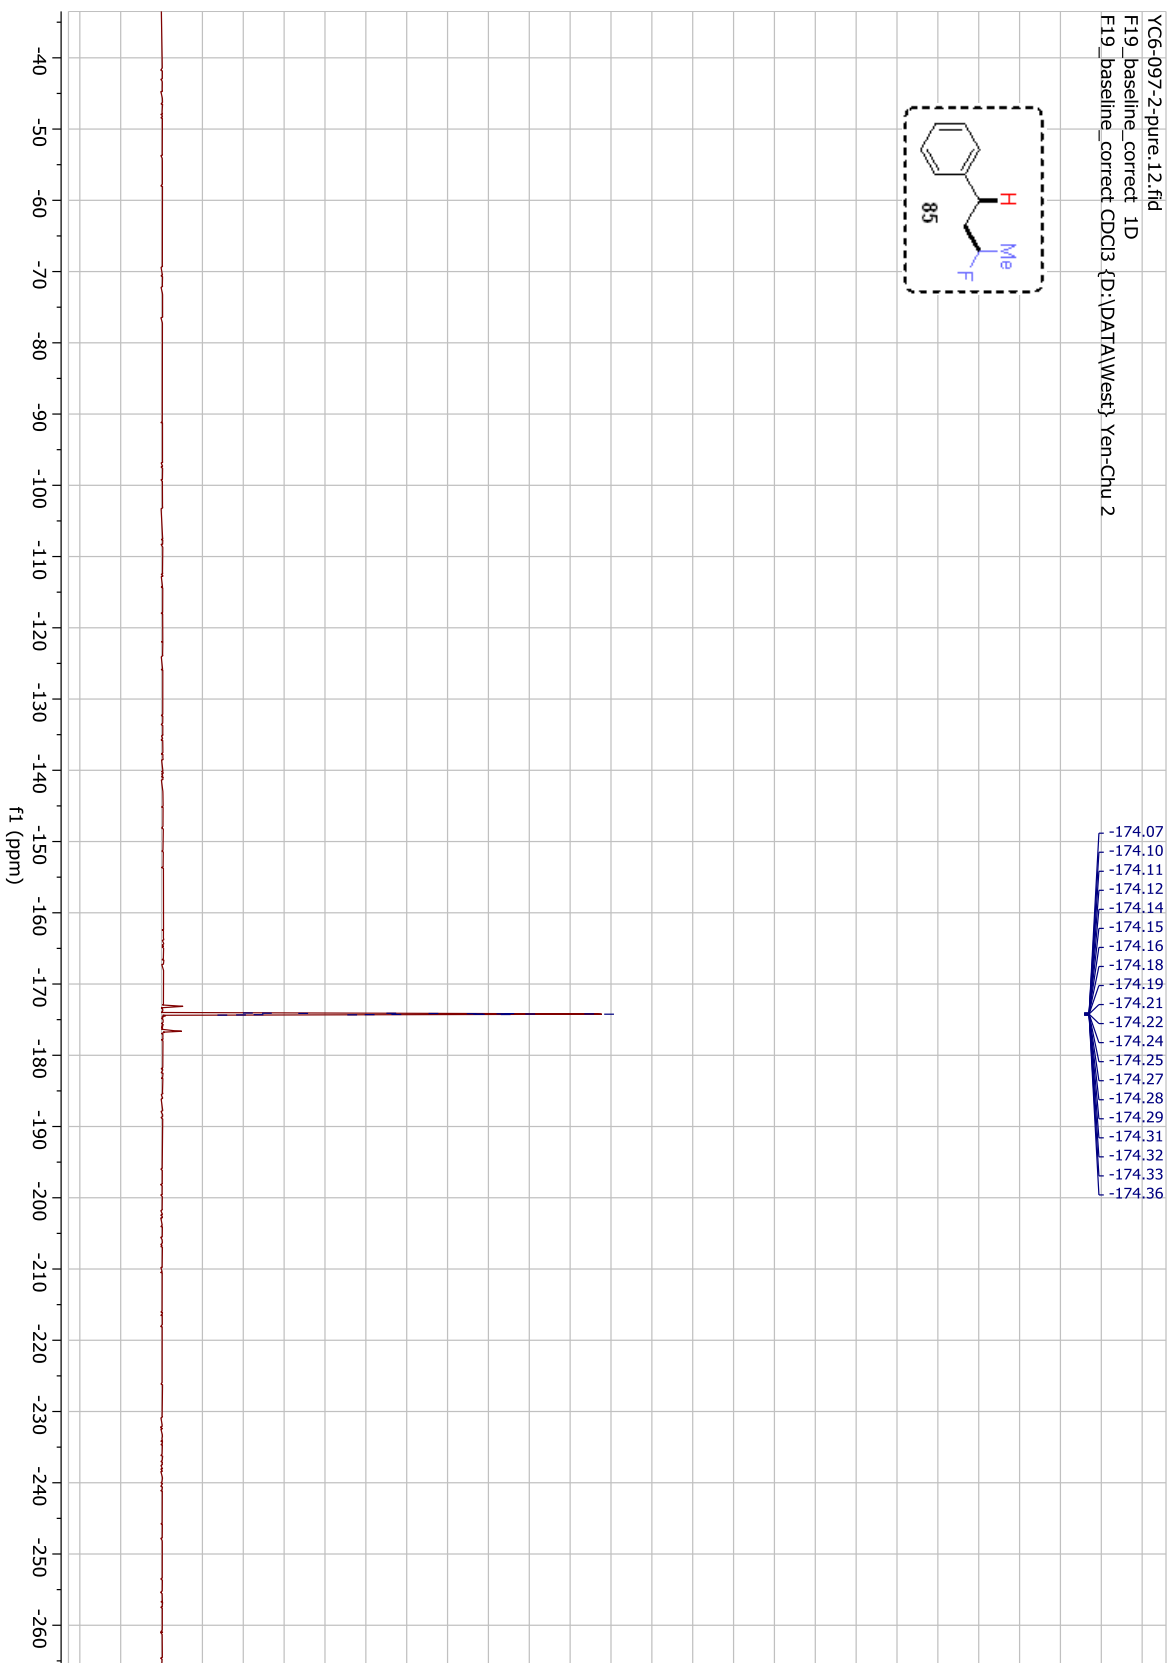

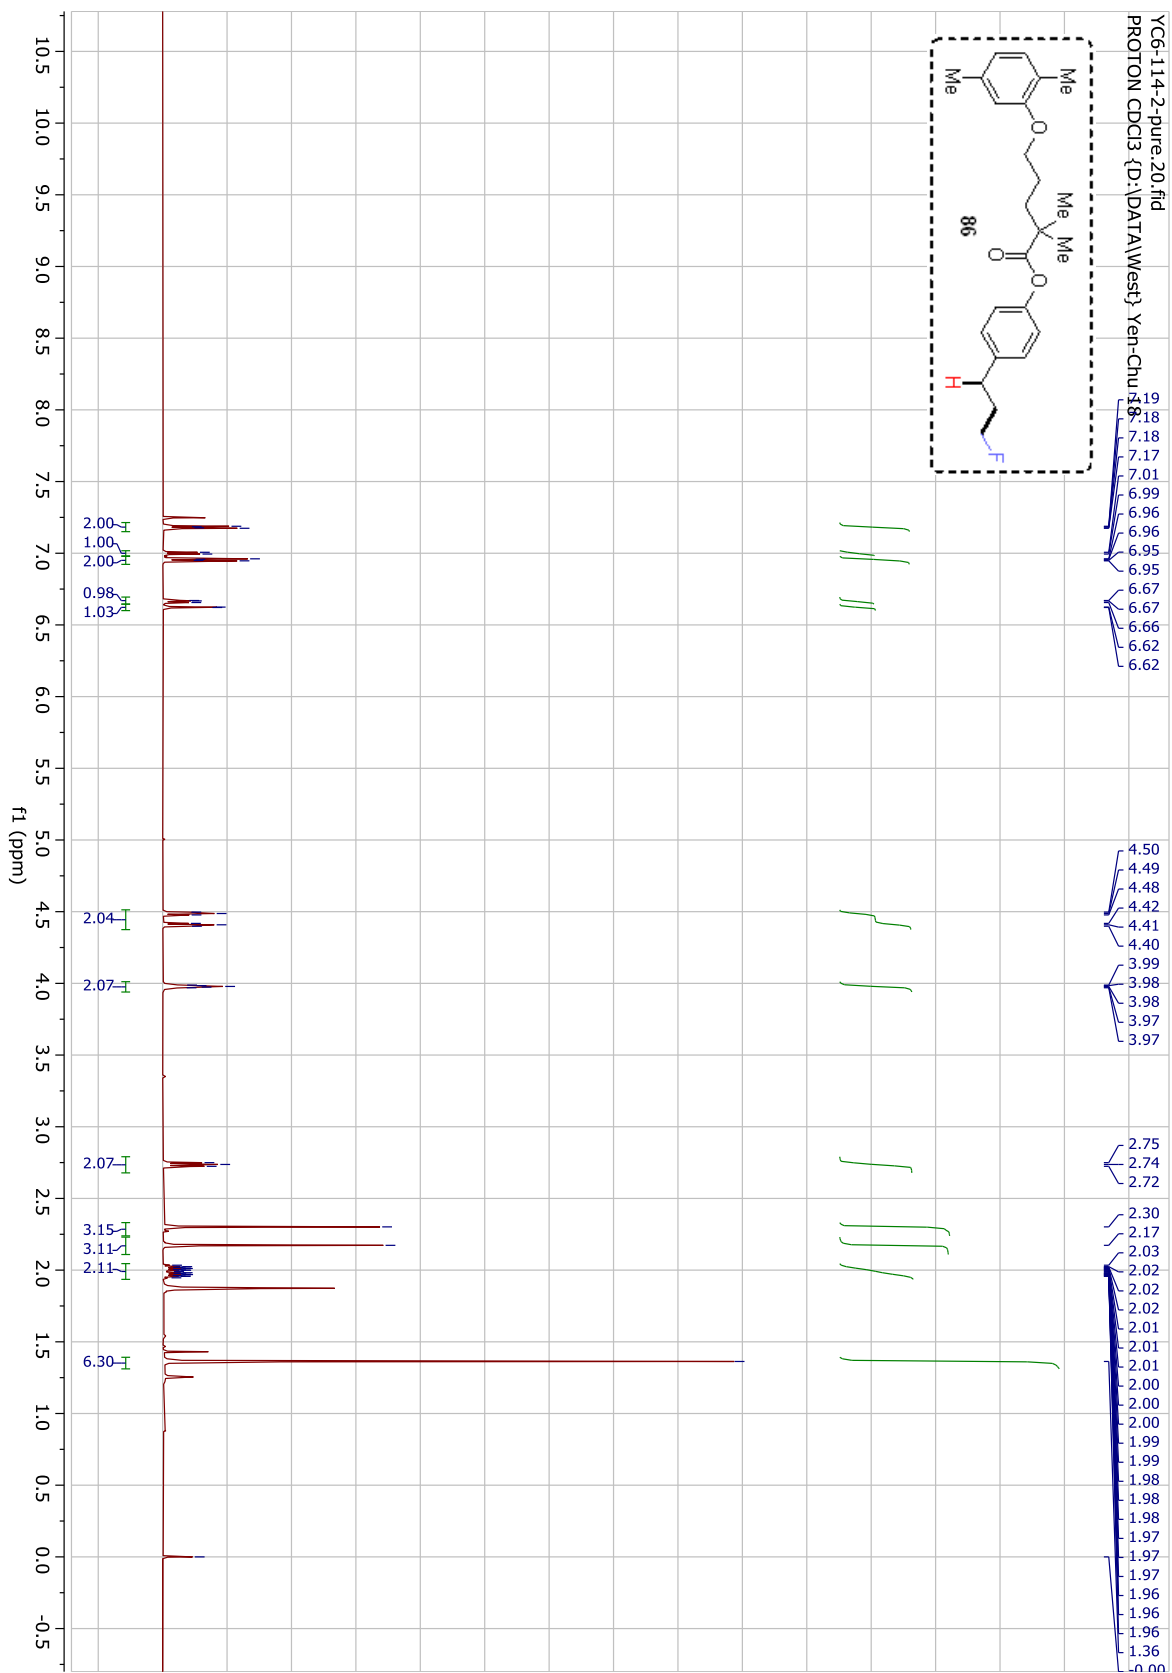

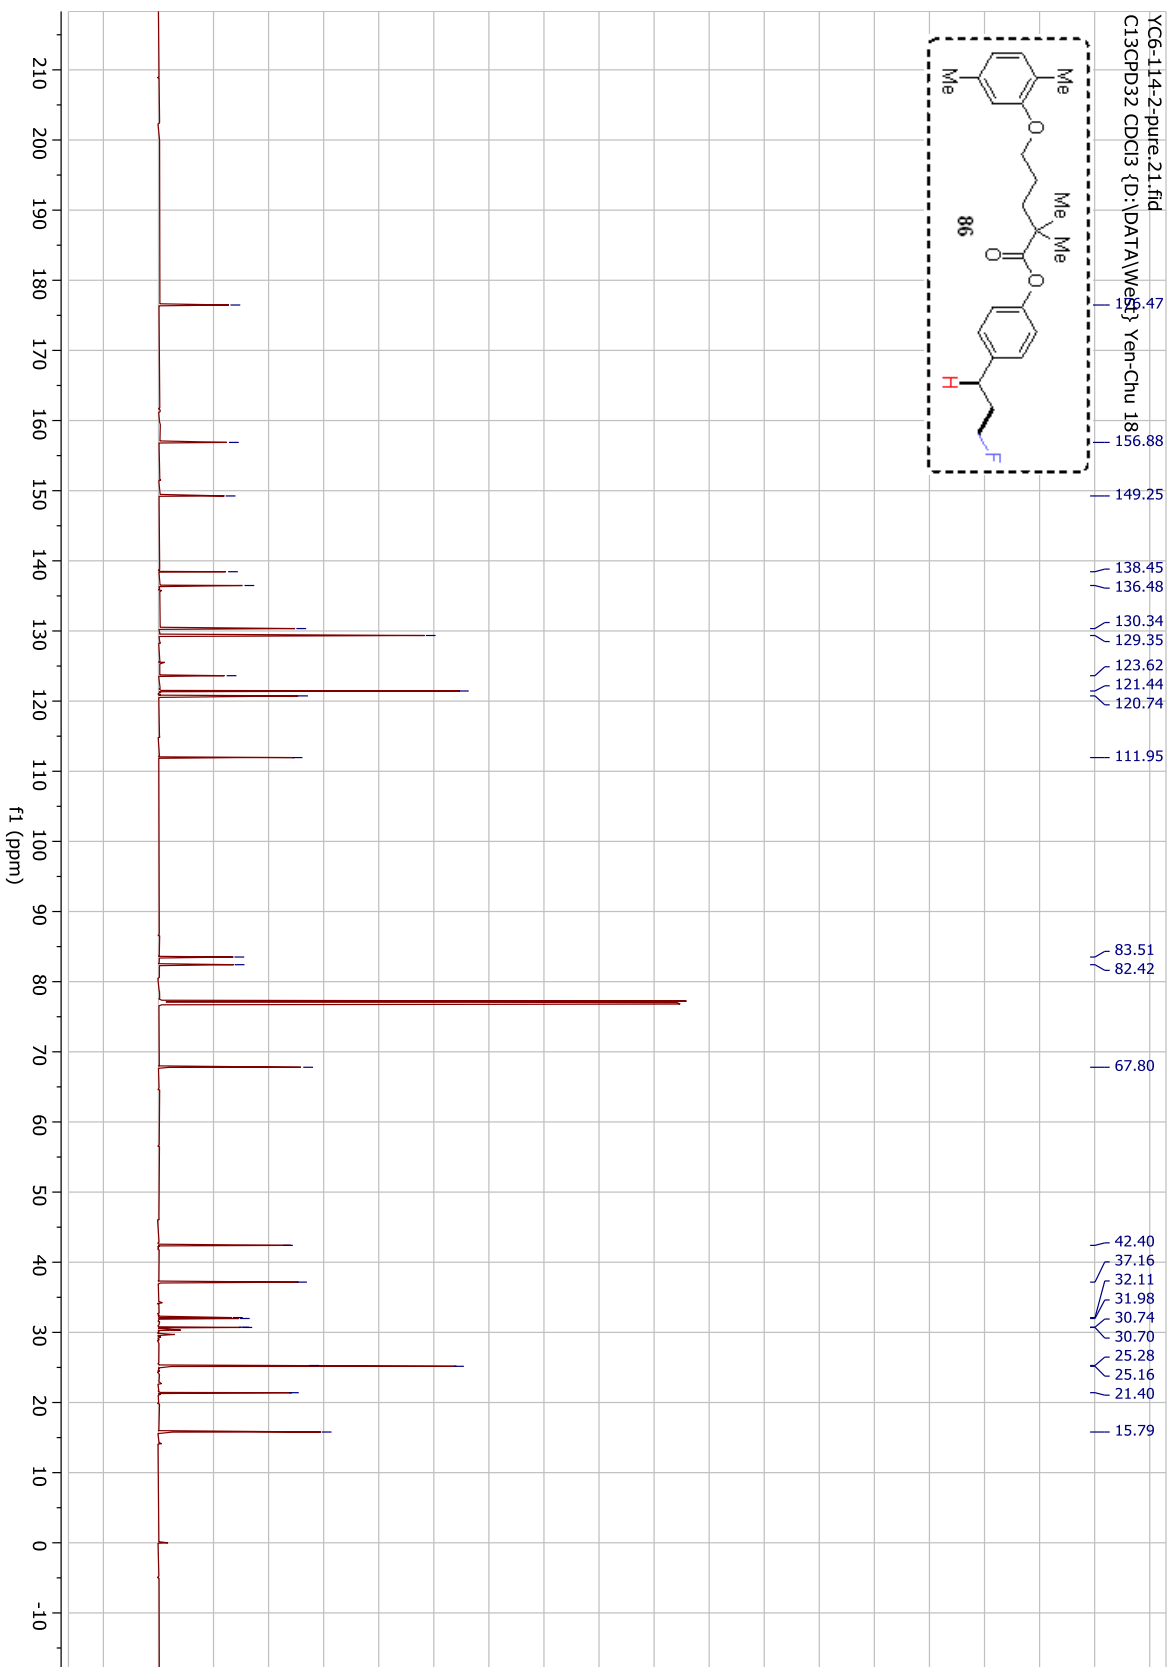

YC6-114-2-pure.22.ftd  
F19\_baseline\_correct ID  
F19\_baseline\_correct CDCl3 {D:\DATA\West} Yen-Chu 18

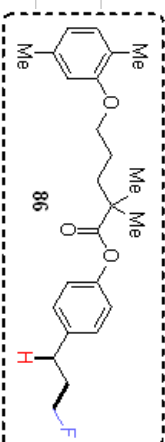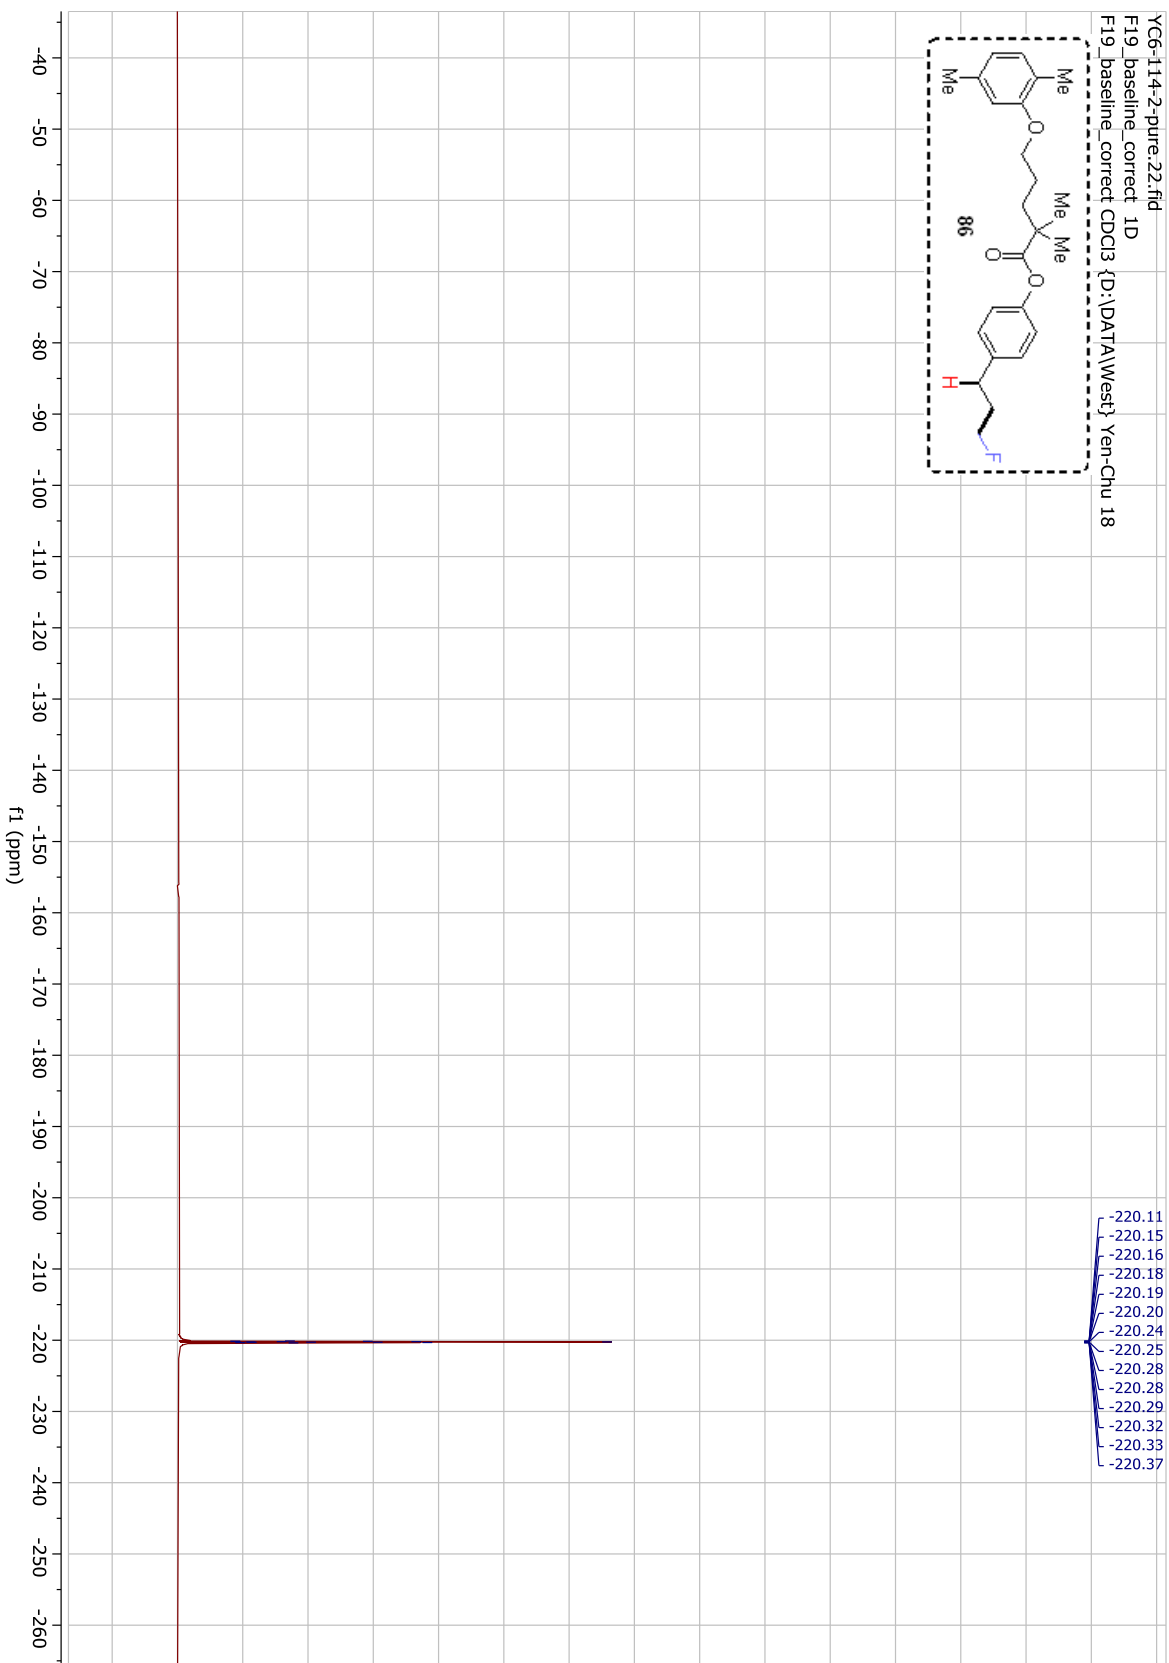

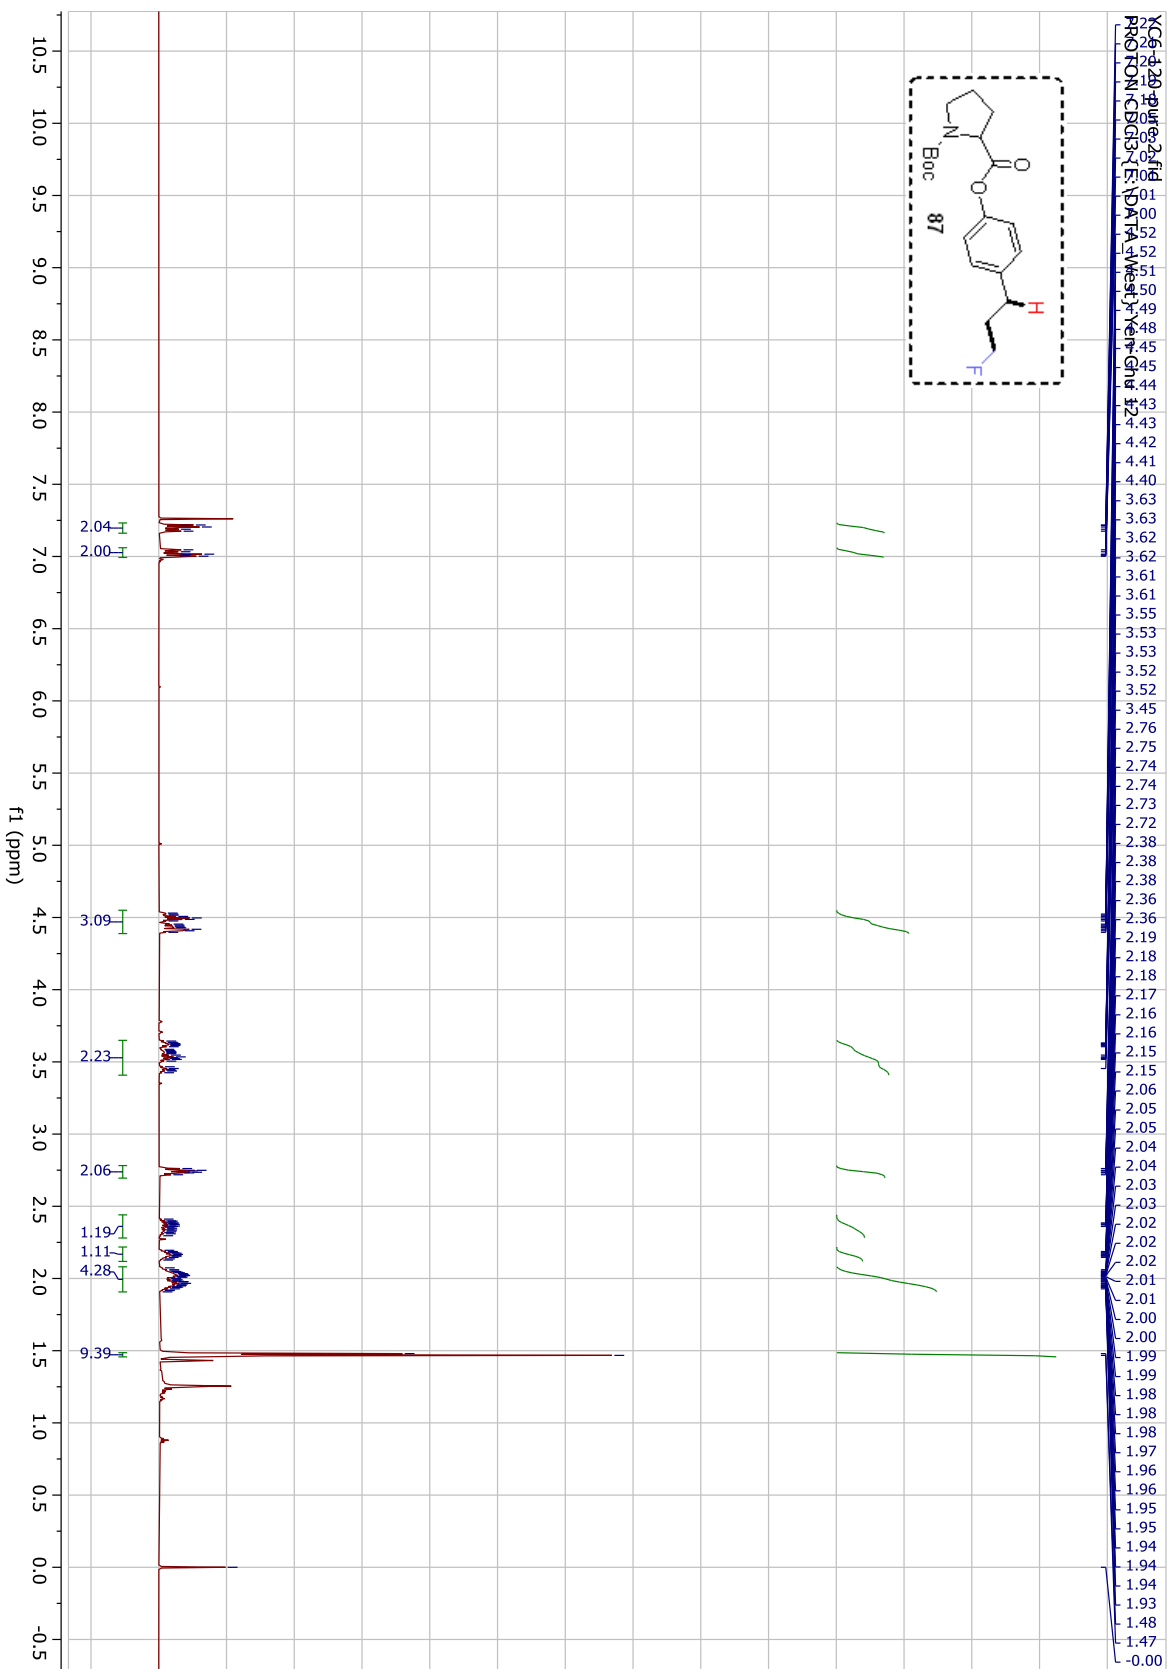

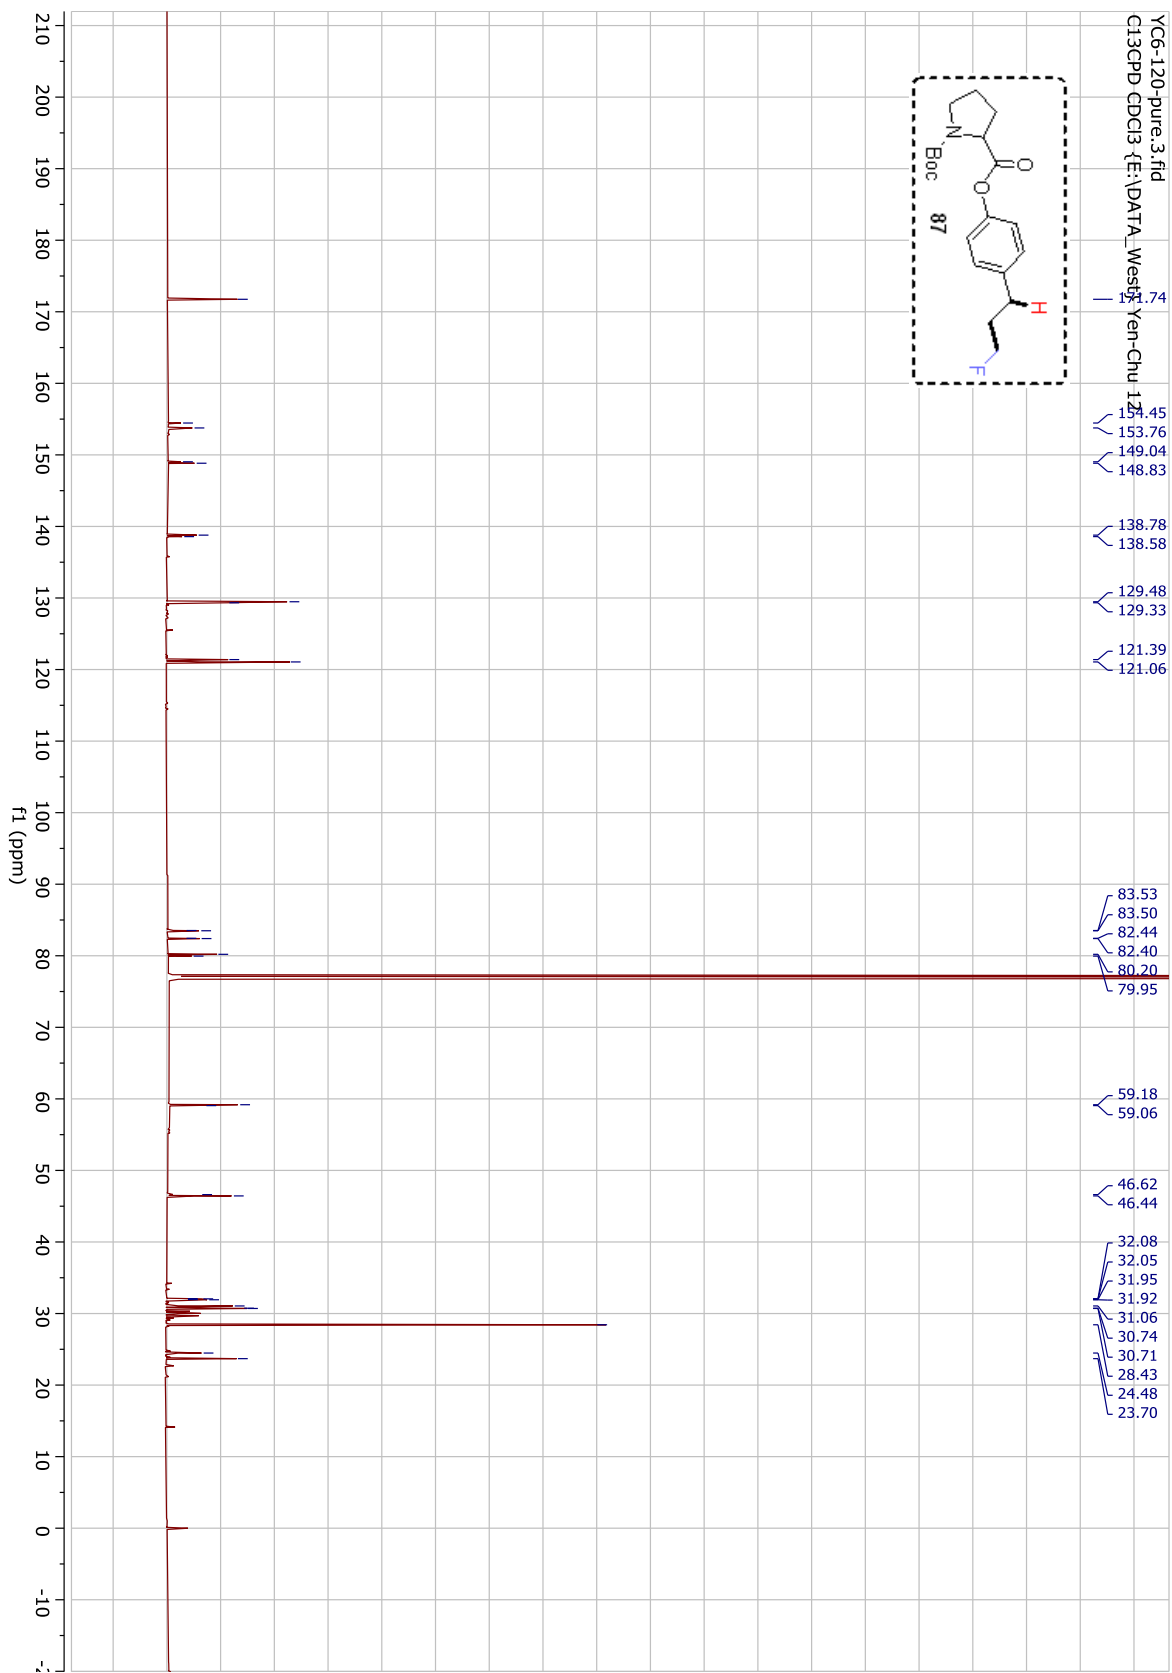



YC6-120-pure.11.fid  
F19

F19 CDQ3 {D:\DATA\West\ Yen-Chu 22

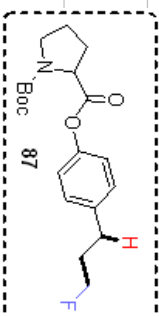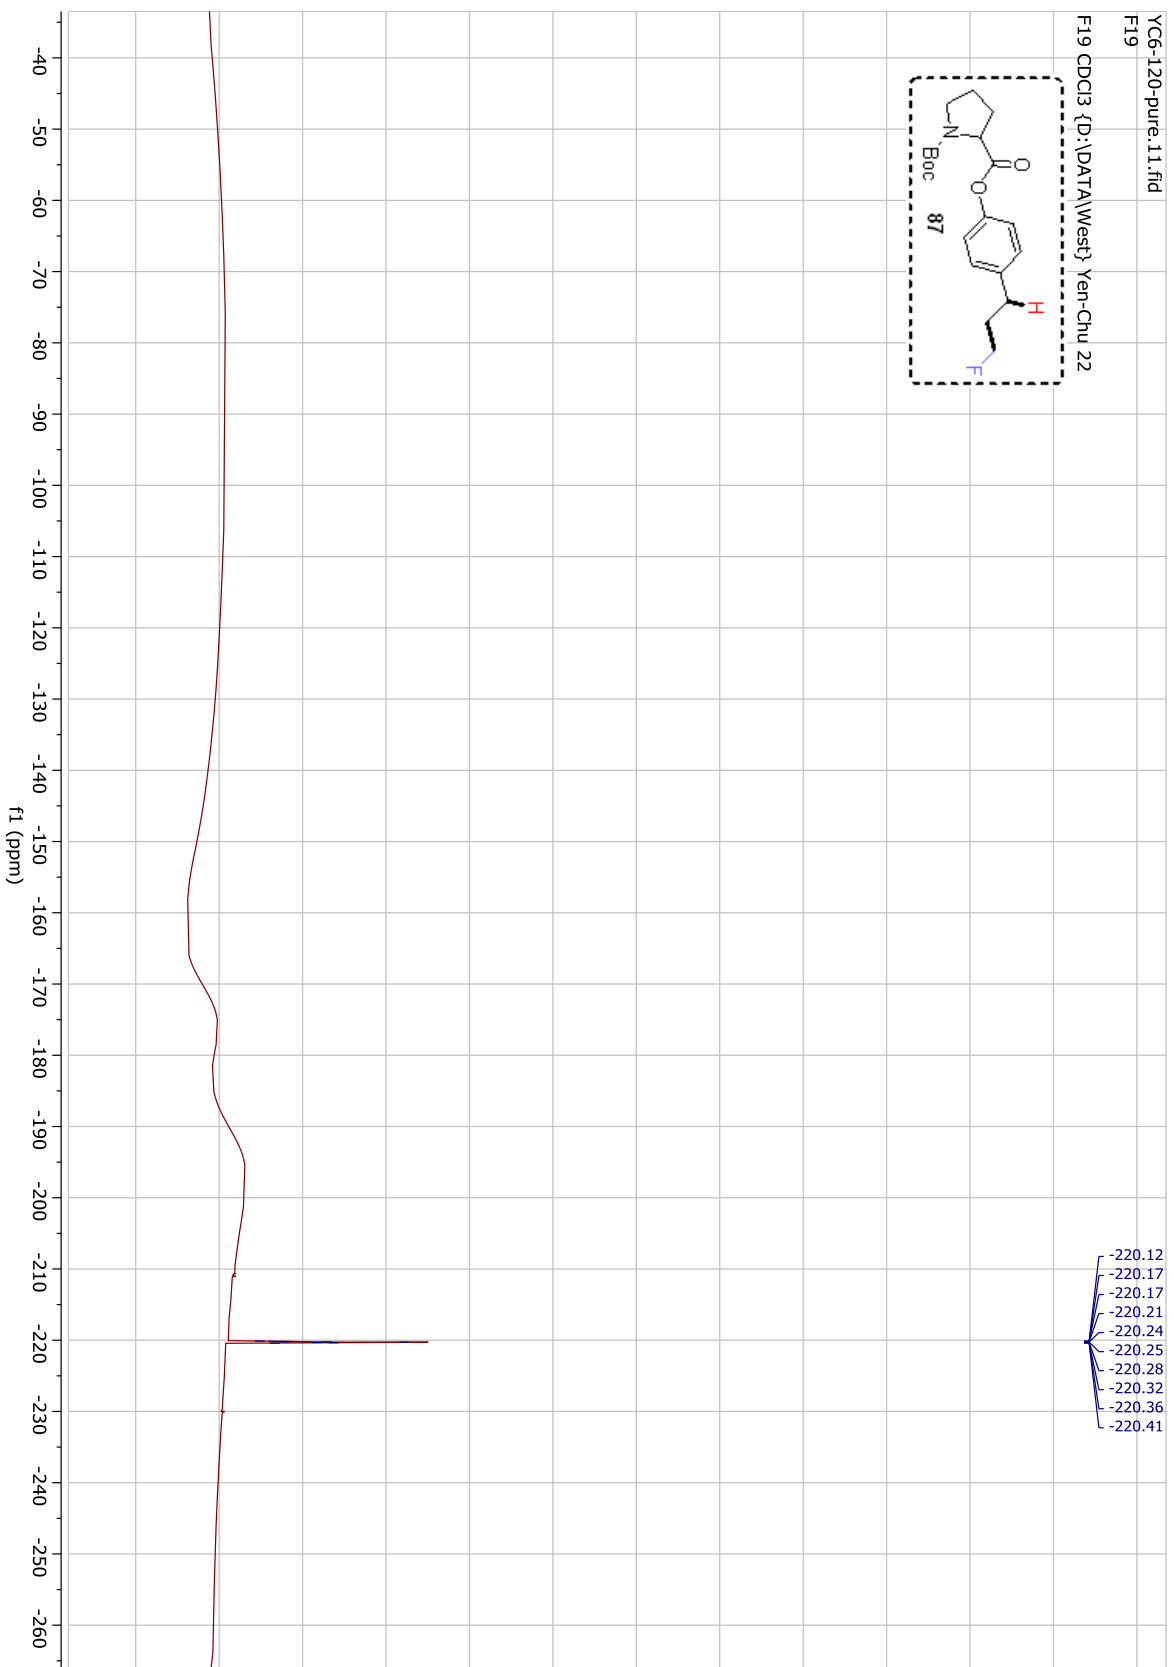

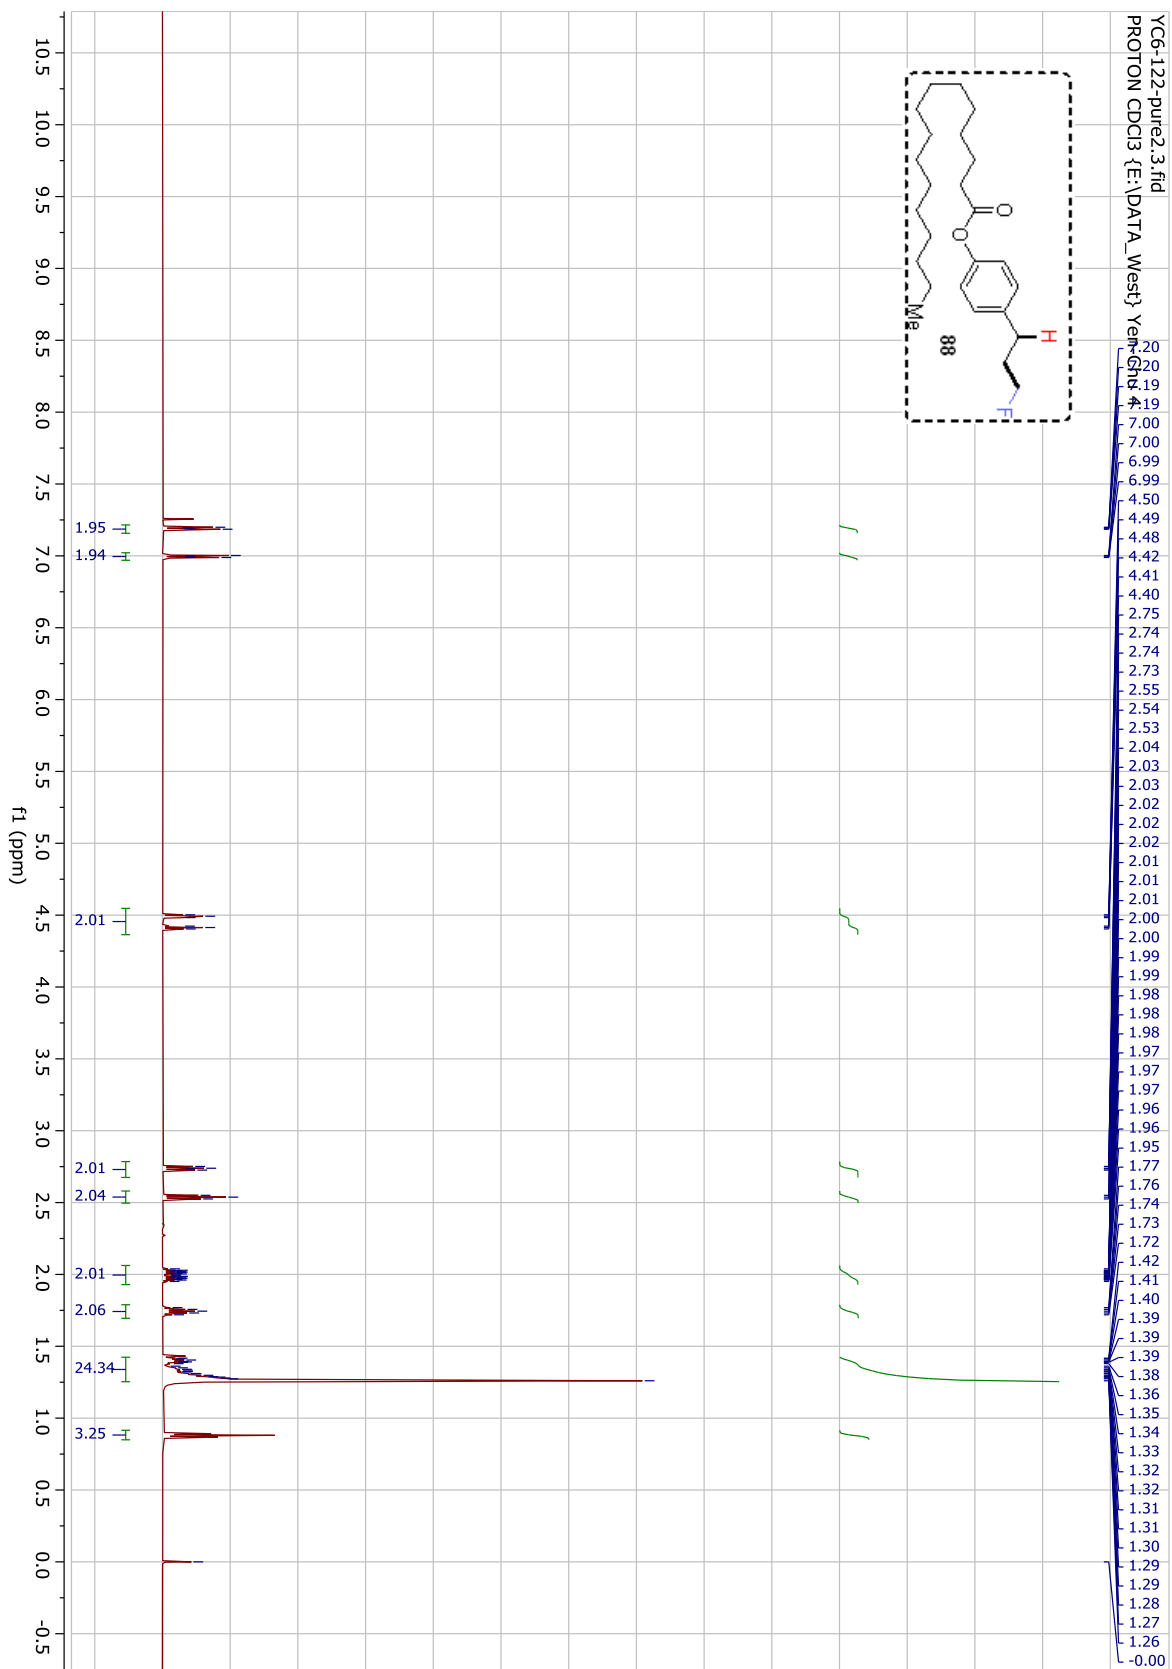

YC6-122 -pure2,2.fid  
C13CPD CDCl3 (E:\DATA\_Westj\YeR\Chu-22

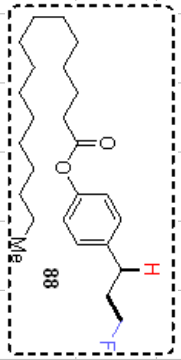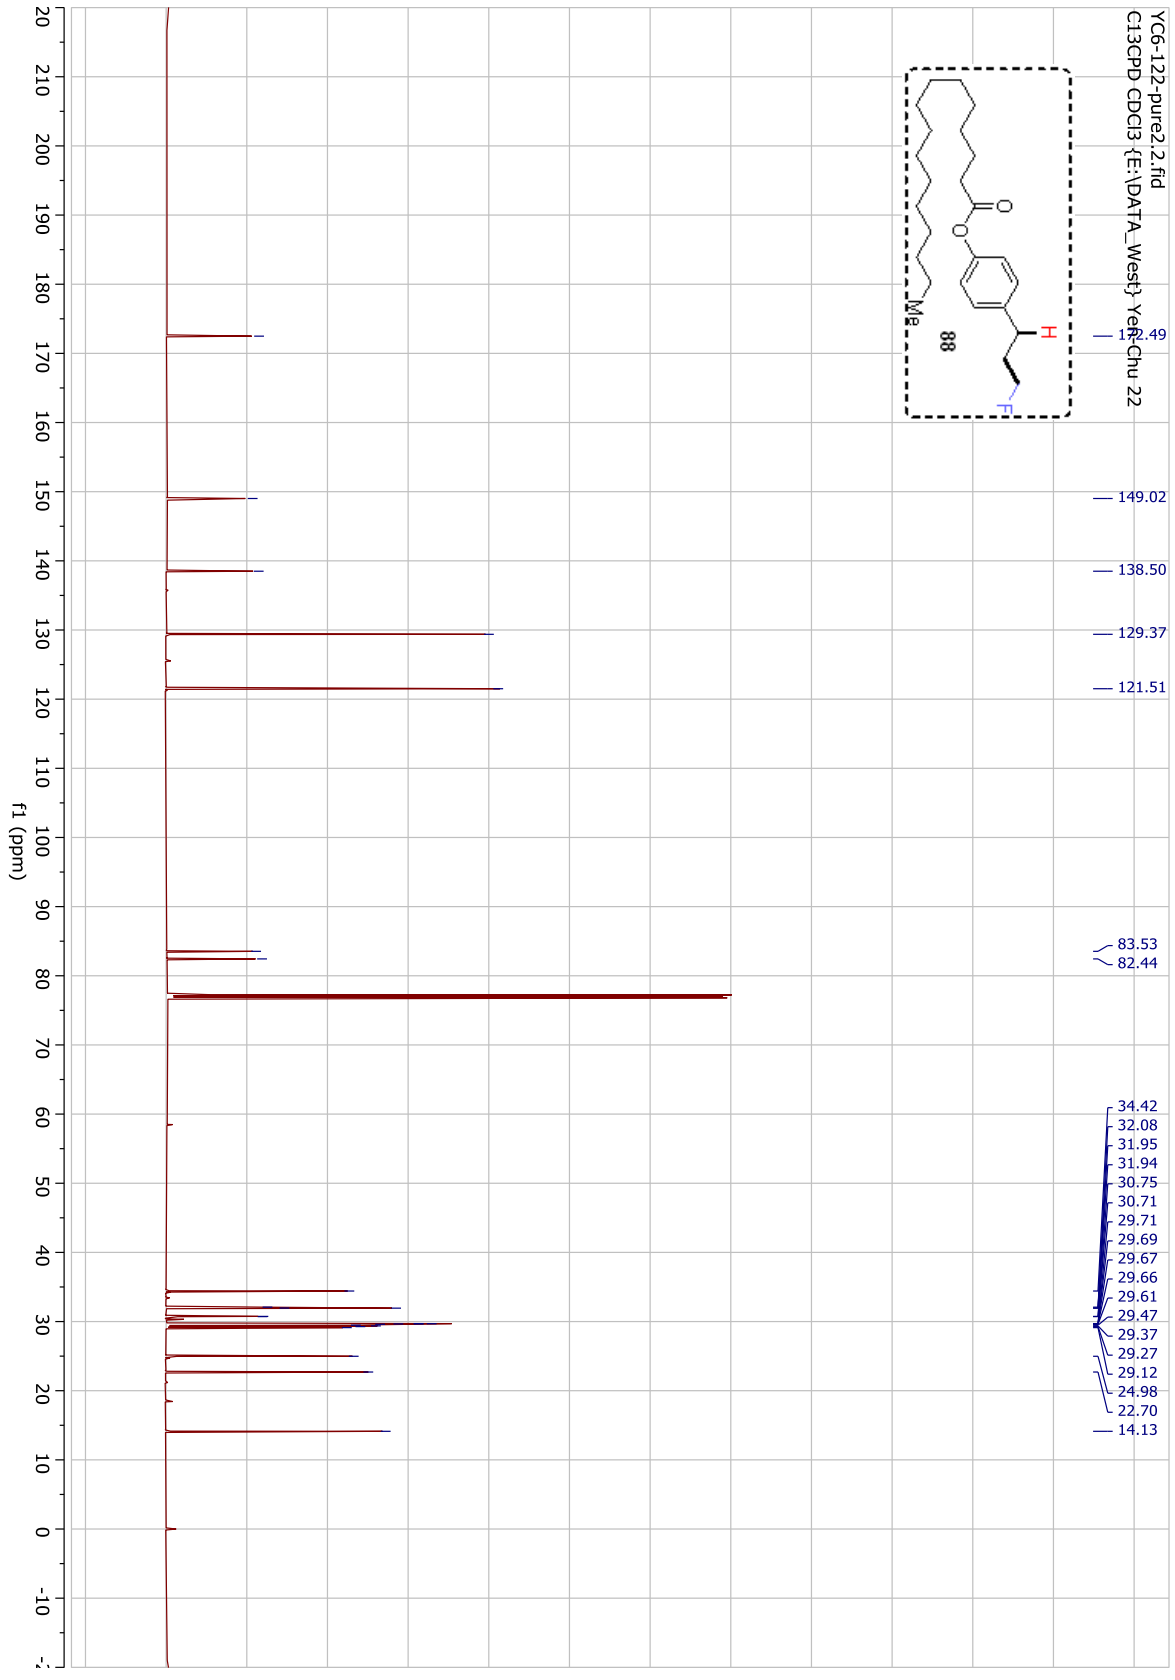

340

YC6-122-pure.11.fid

F19

F19 CDCl3 {D:\DATA\West\ Yen-Chu 23

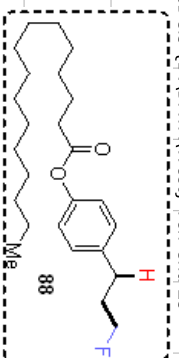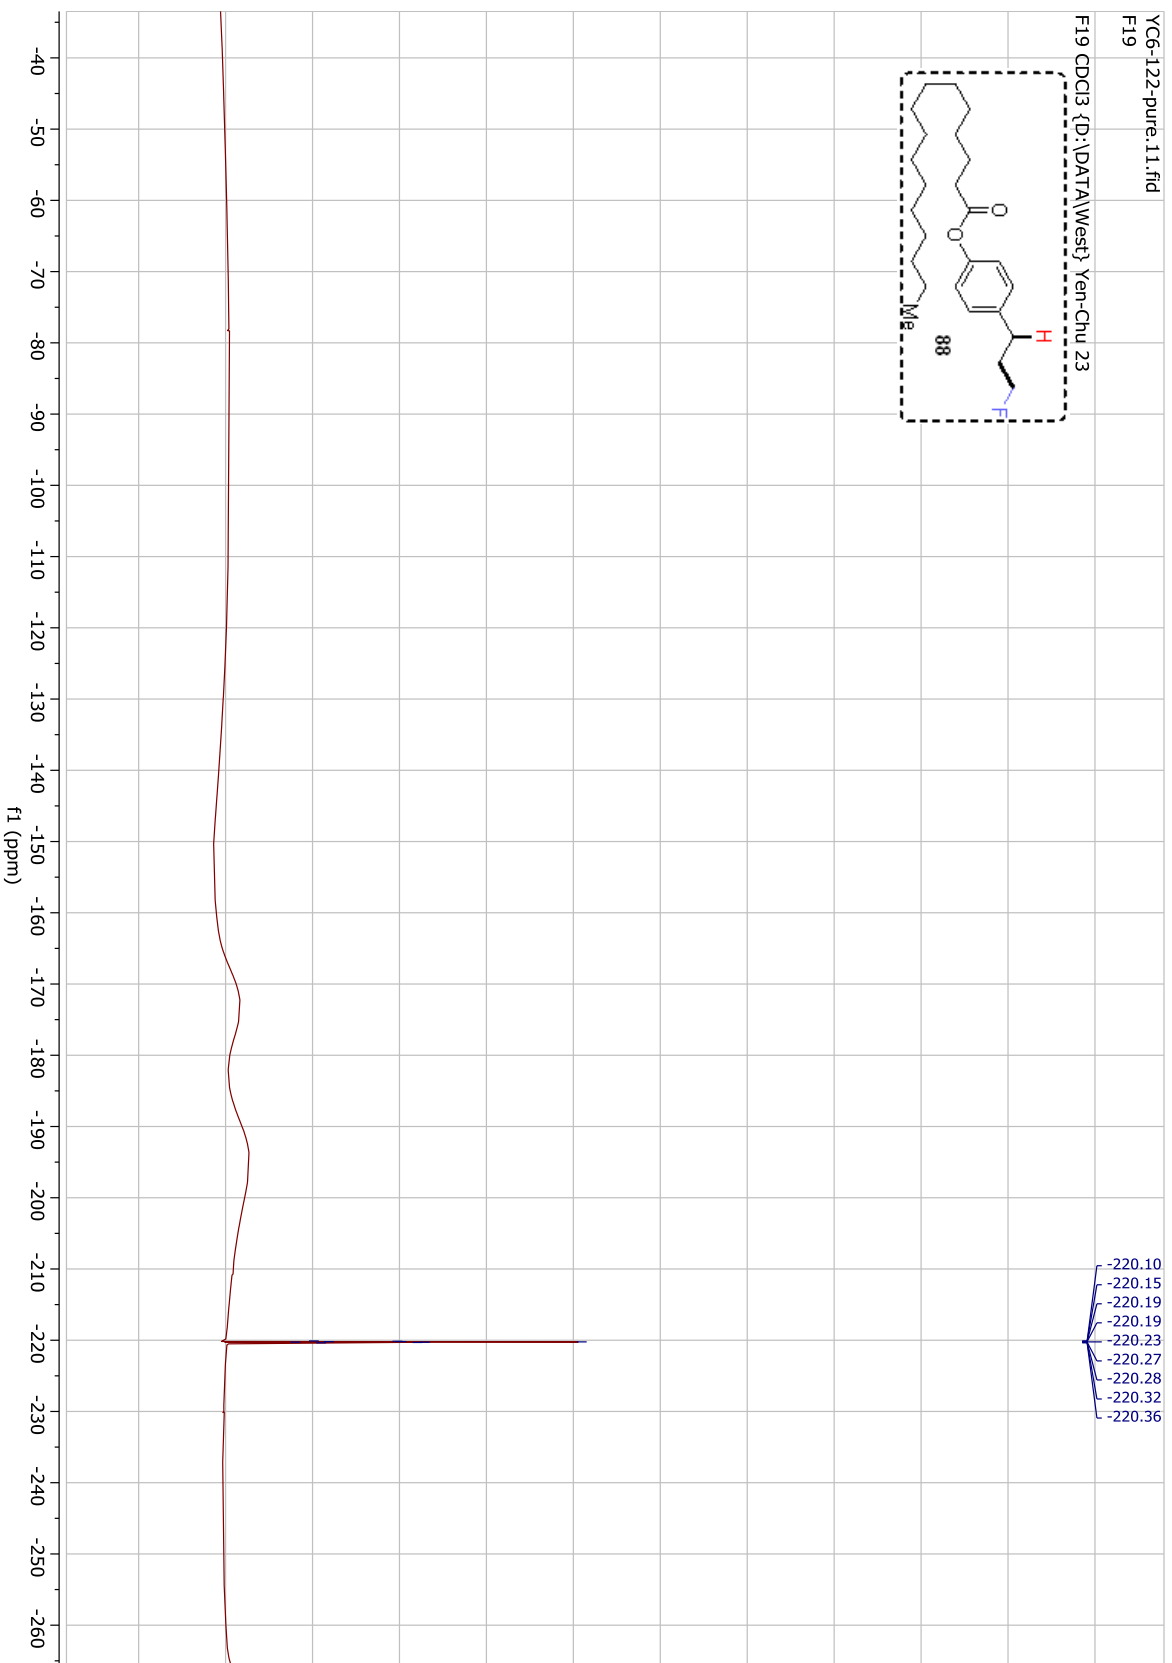

341

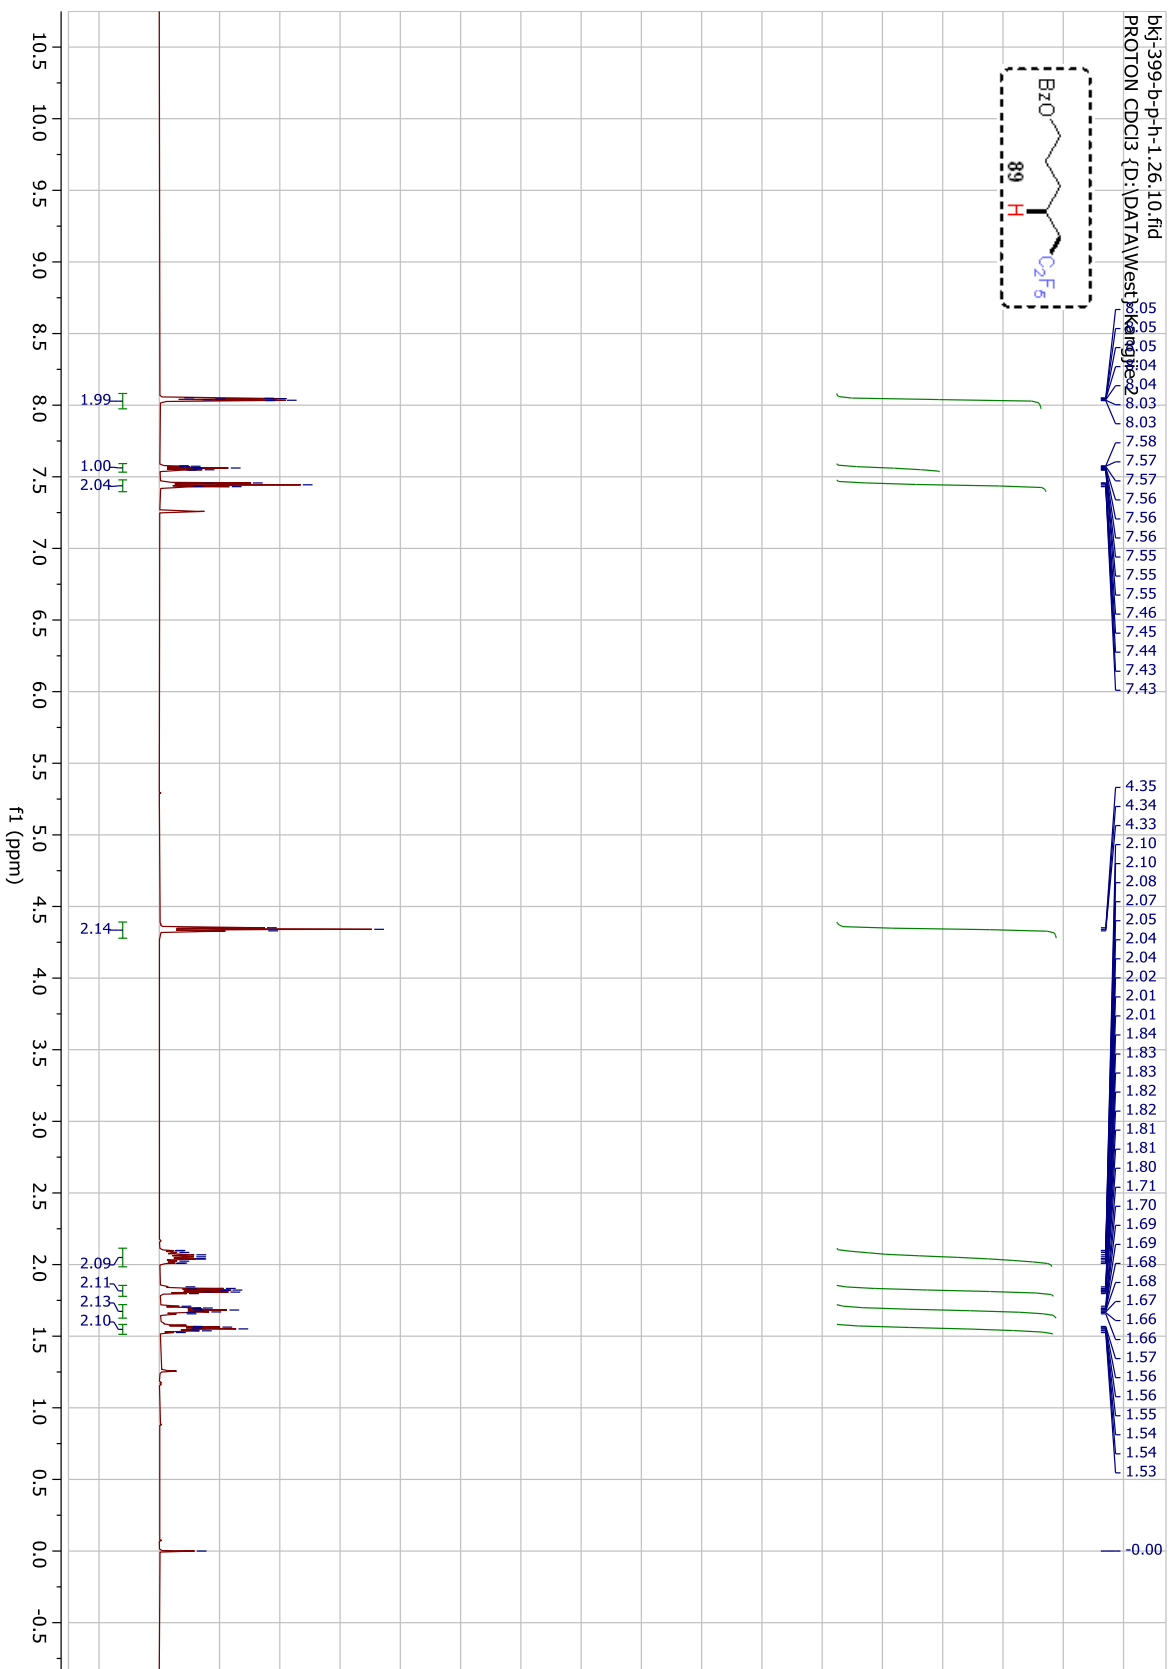

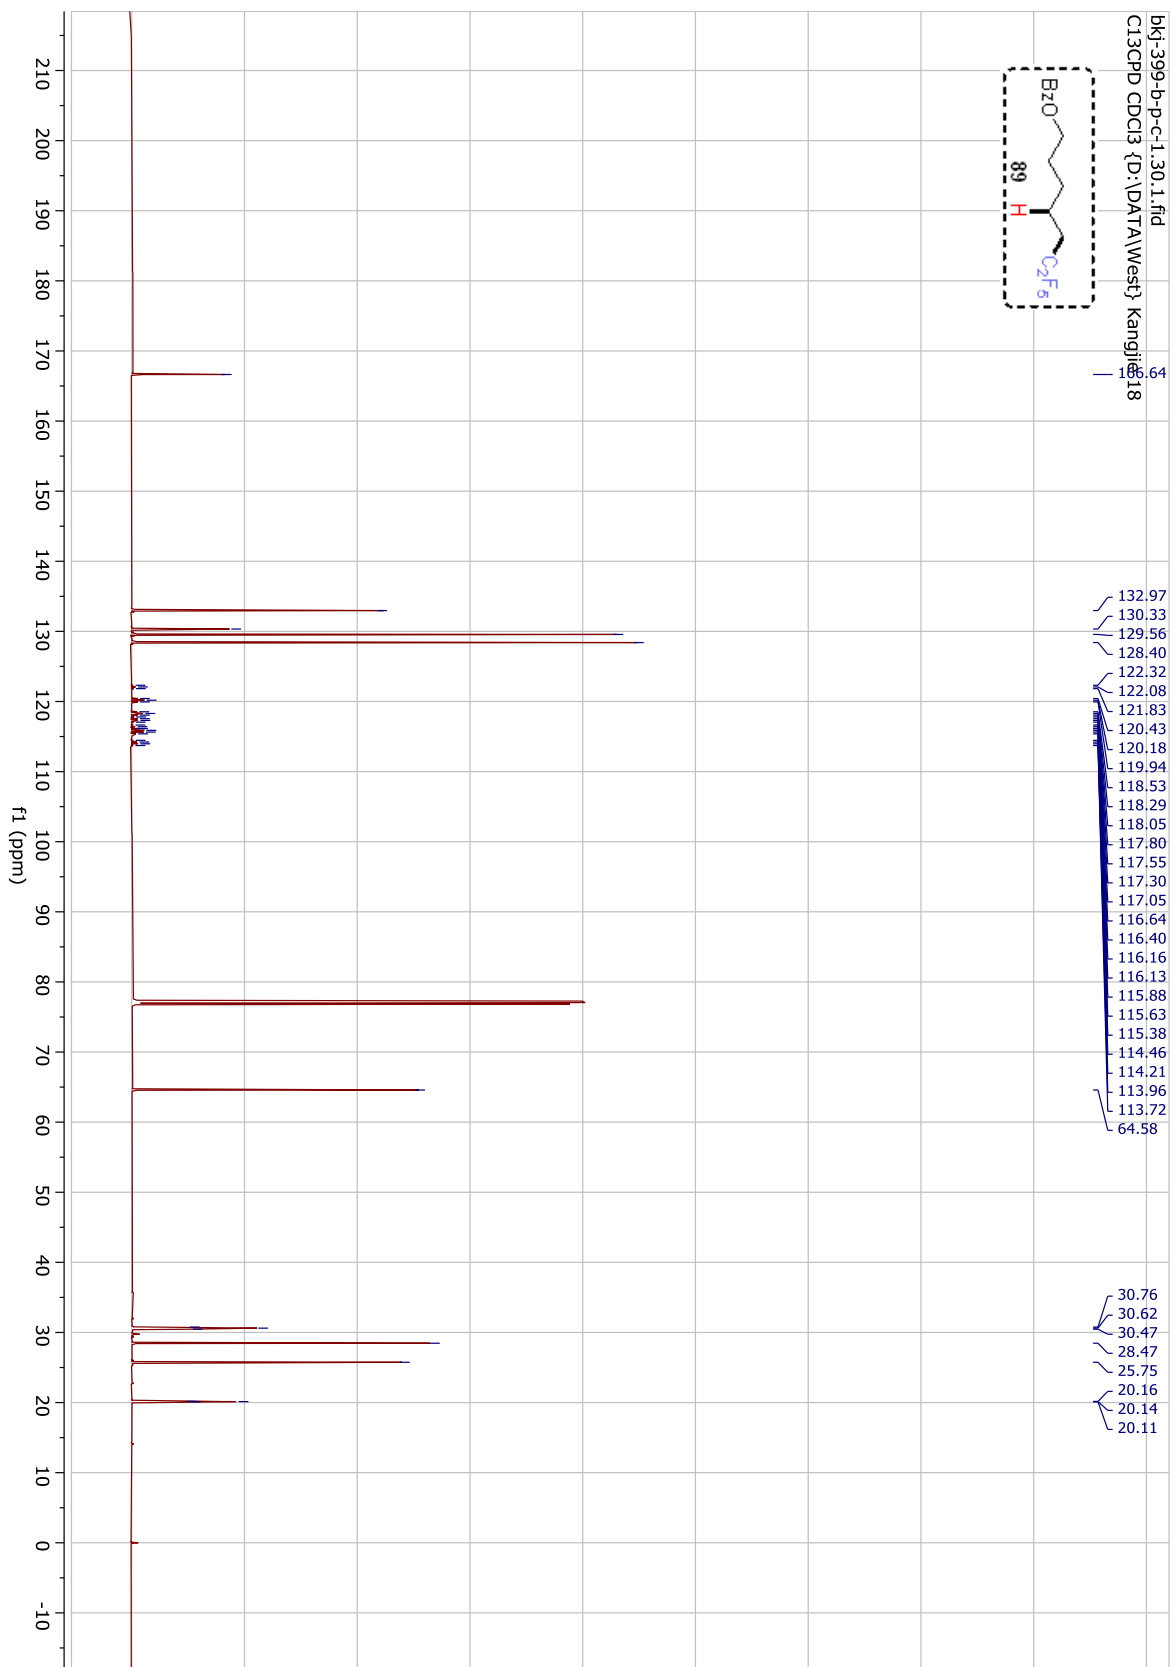

bkj-399-b-p-h-1.26.11.fid  
F19\_baseline\_correct 1D  
F19\_baseline\_correct CDC13 {D:\DATA\West} Kangjie 2

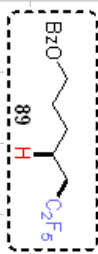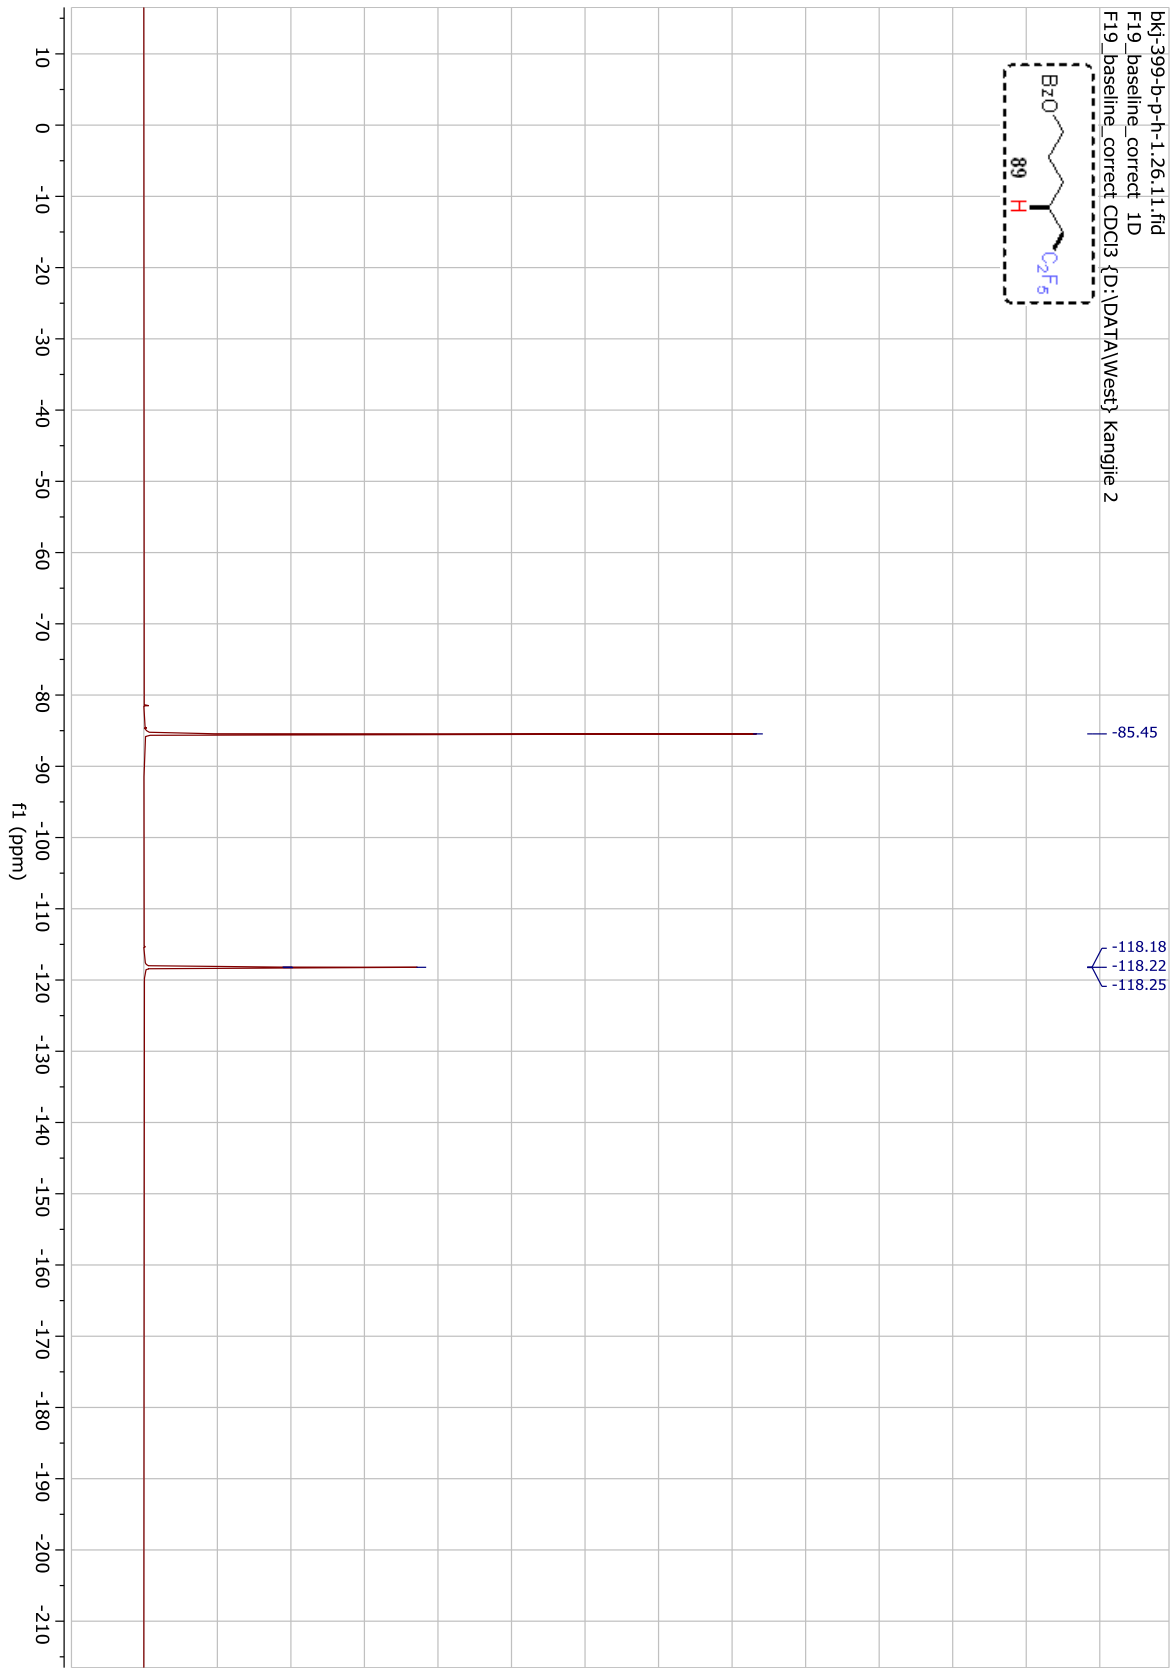

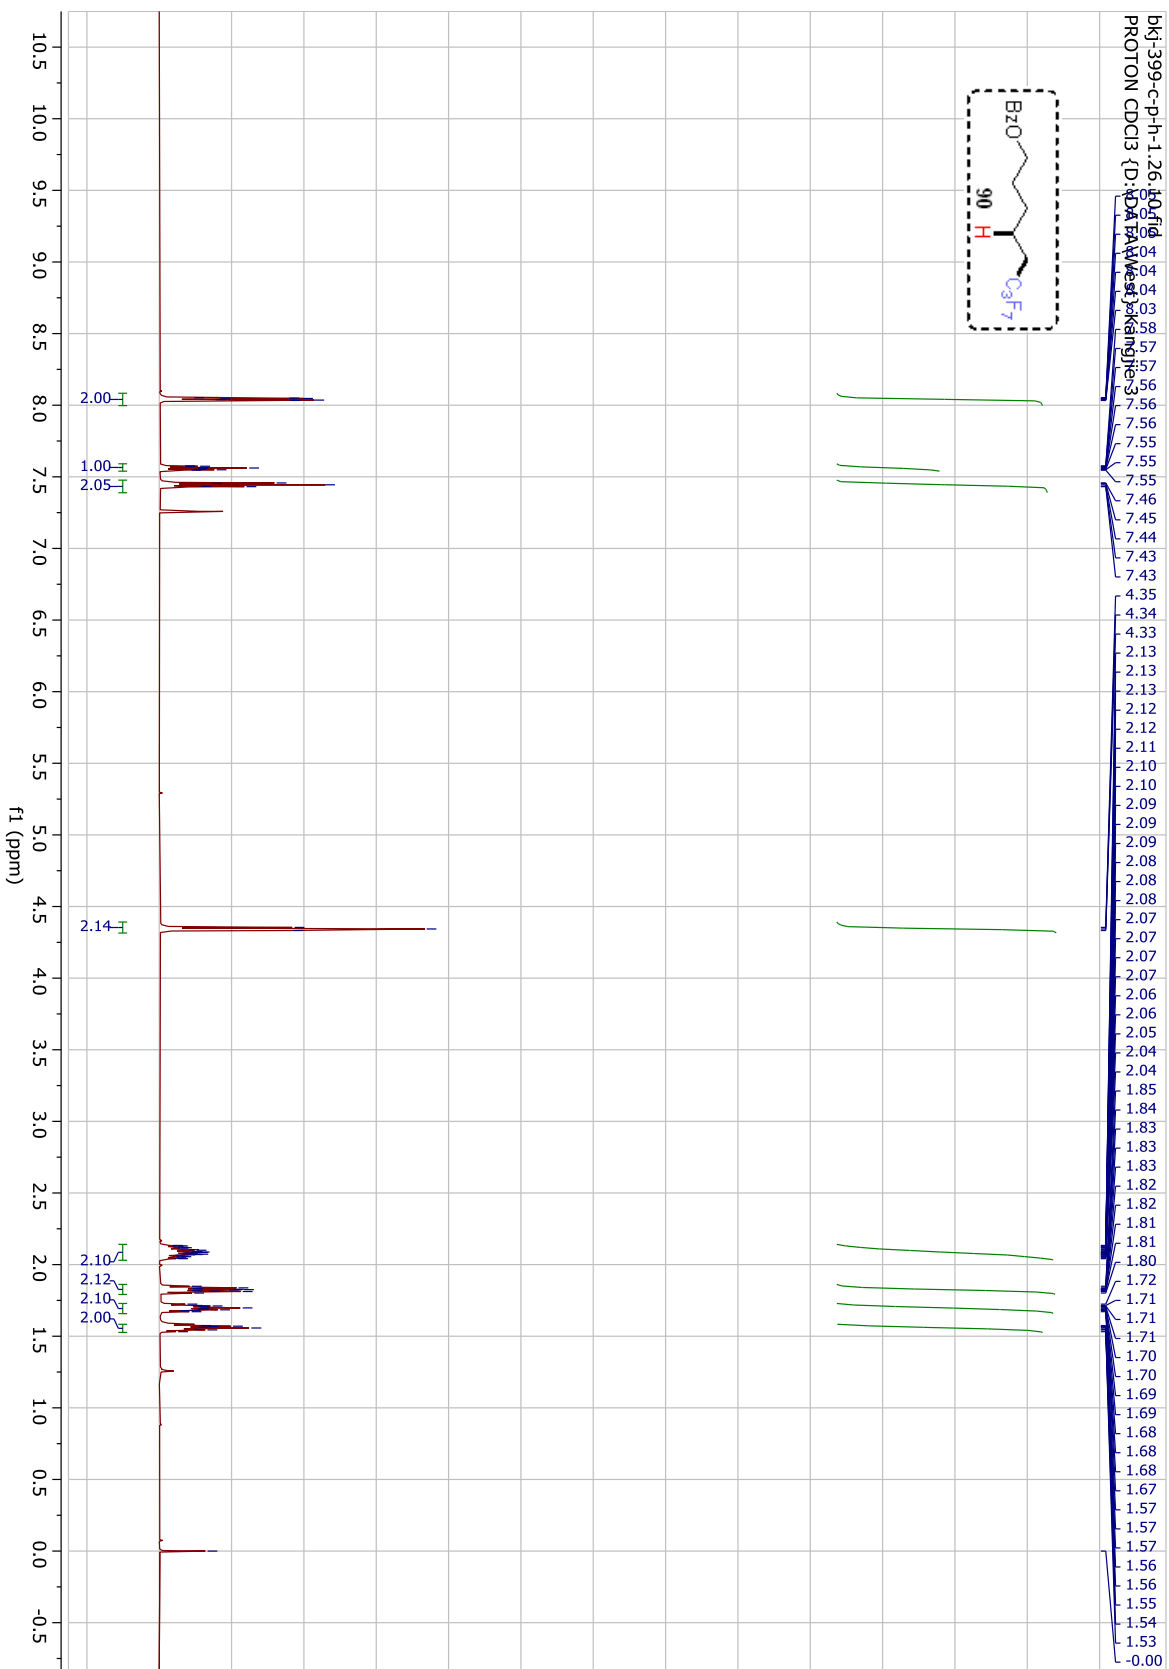



bkj-399-c-p-c-1\_30.1.fid  
C13CPD CDCl3 (D:\DATA\Westj\_k\figlie\_19

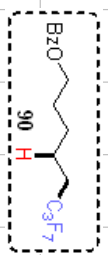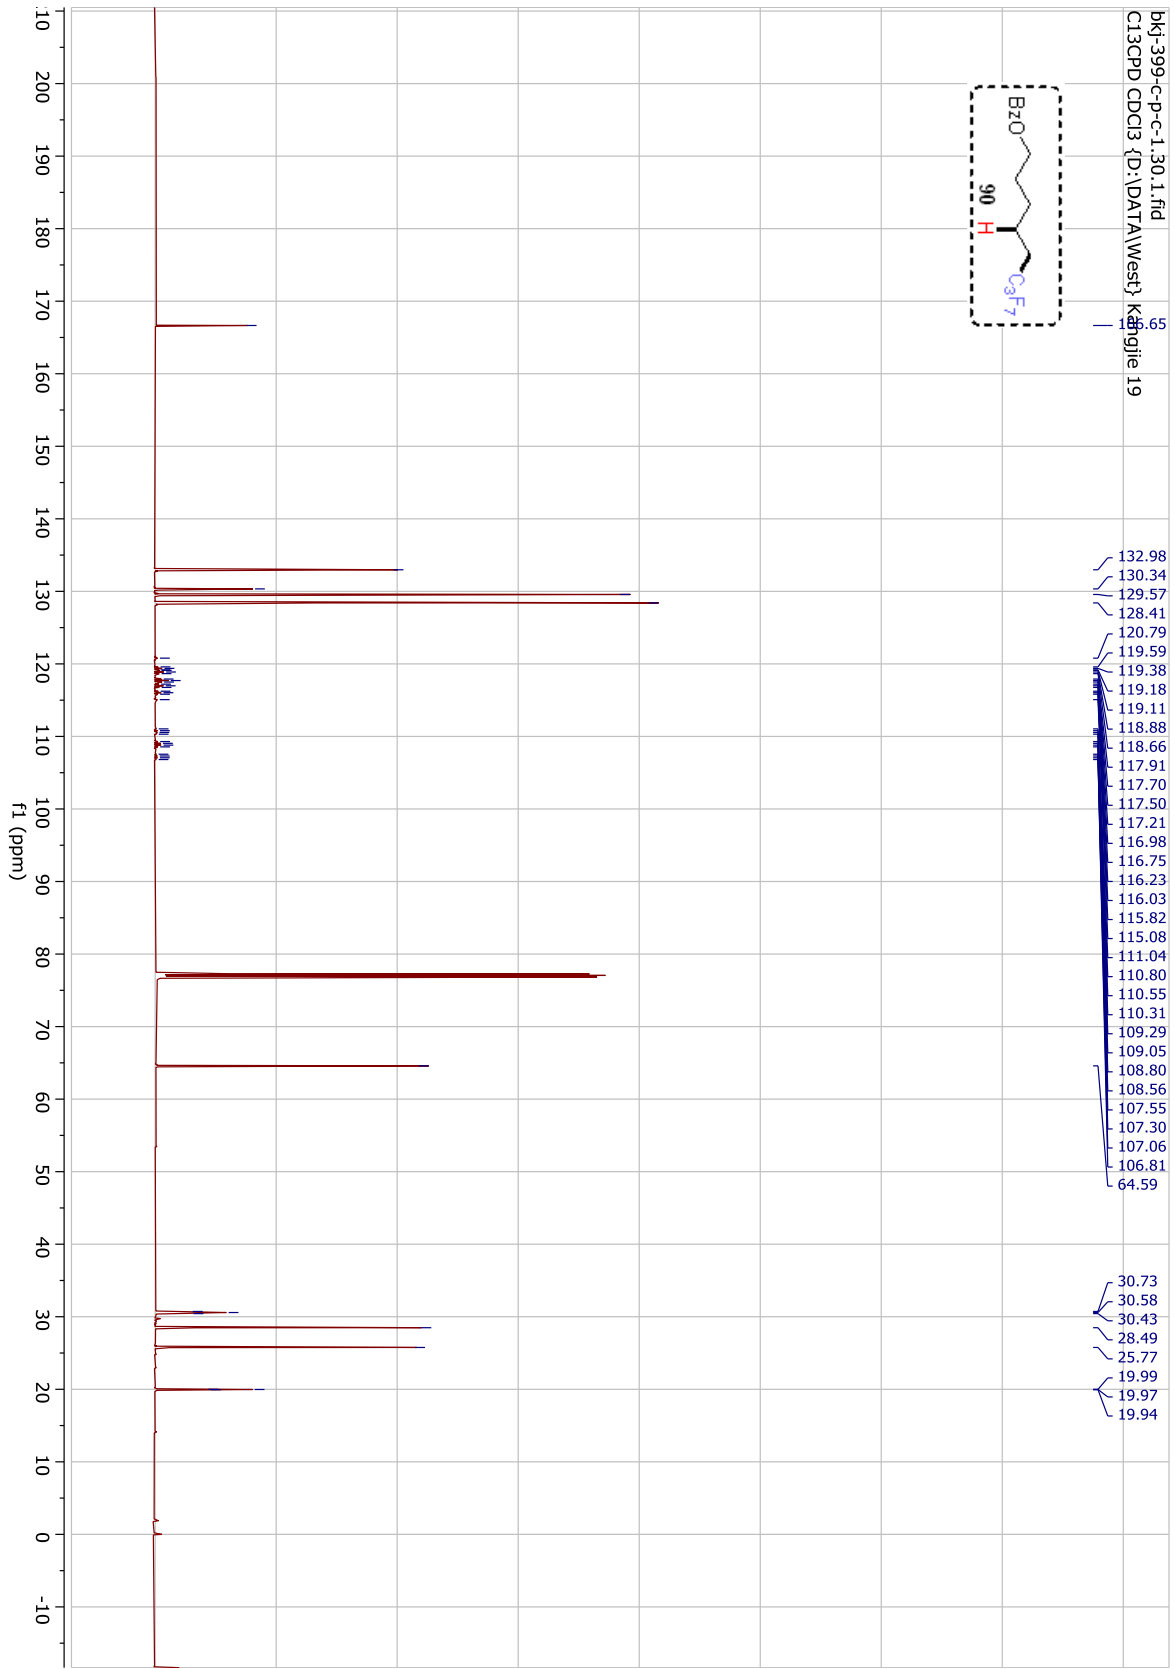

bjl-399-c-p-h-1.26.11.fid  
F19\_baseline\_correct ID  
F19\_baseline\_correct CDCI3 {D:\DATA\West} Kangjie 3

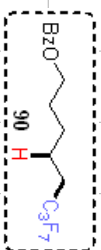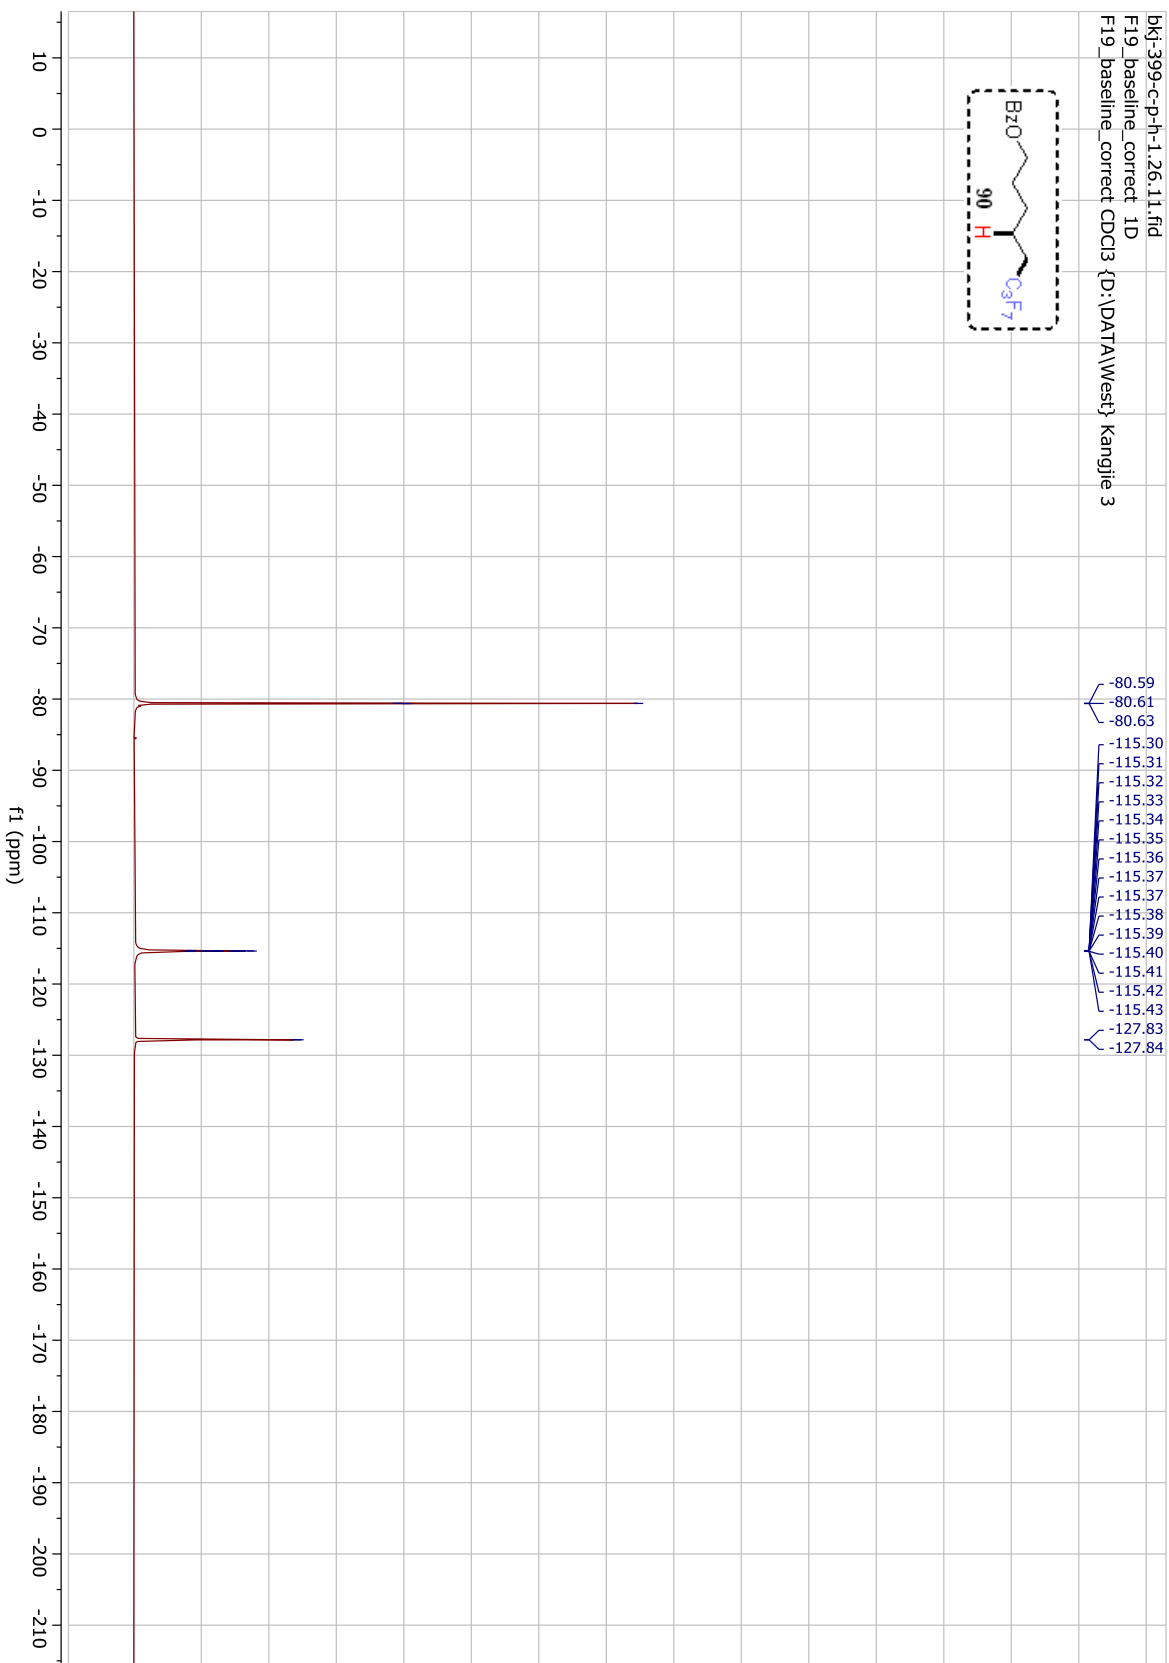

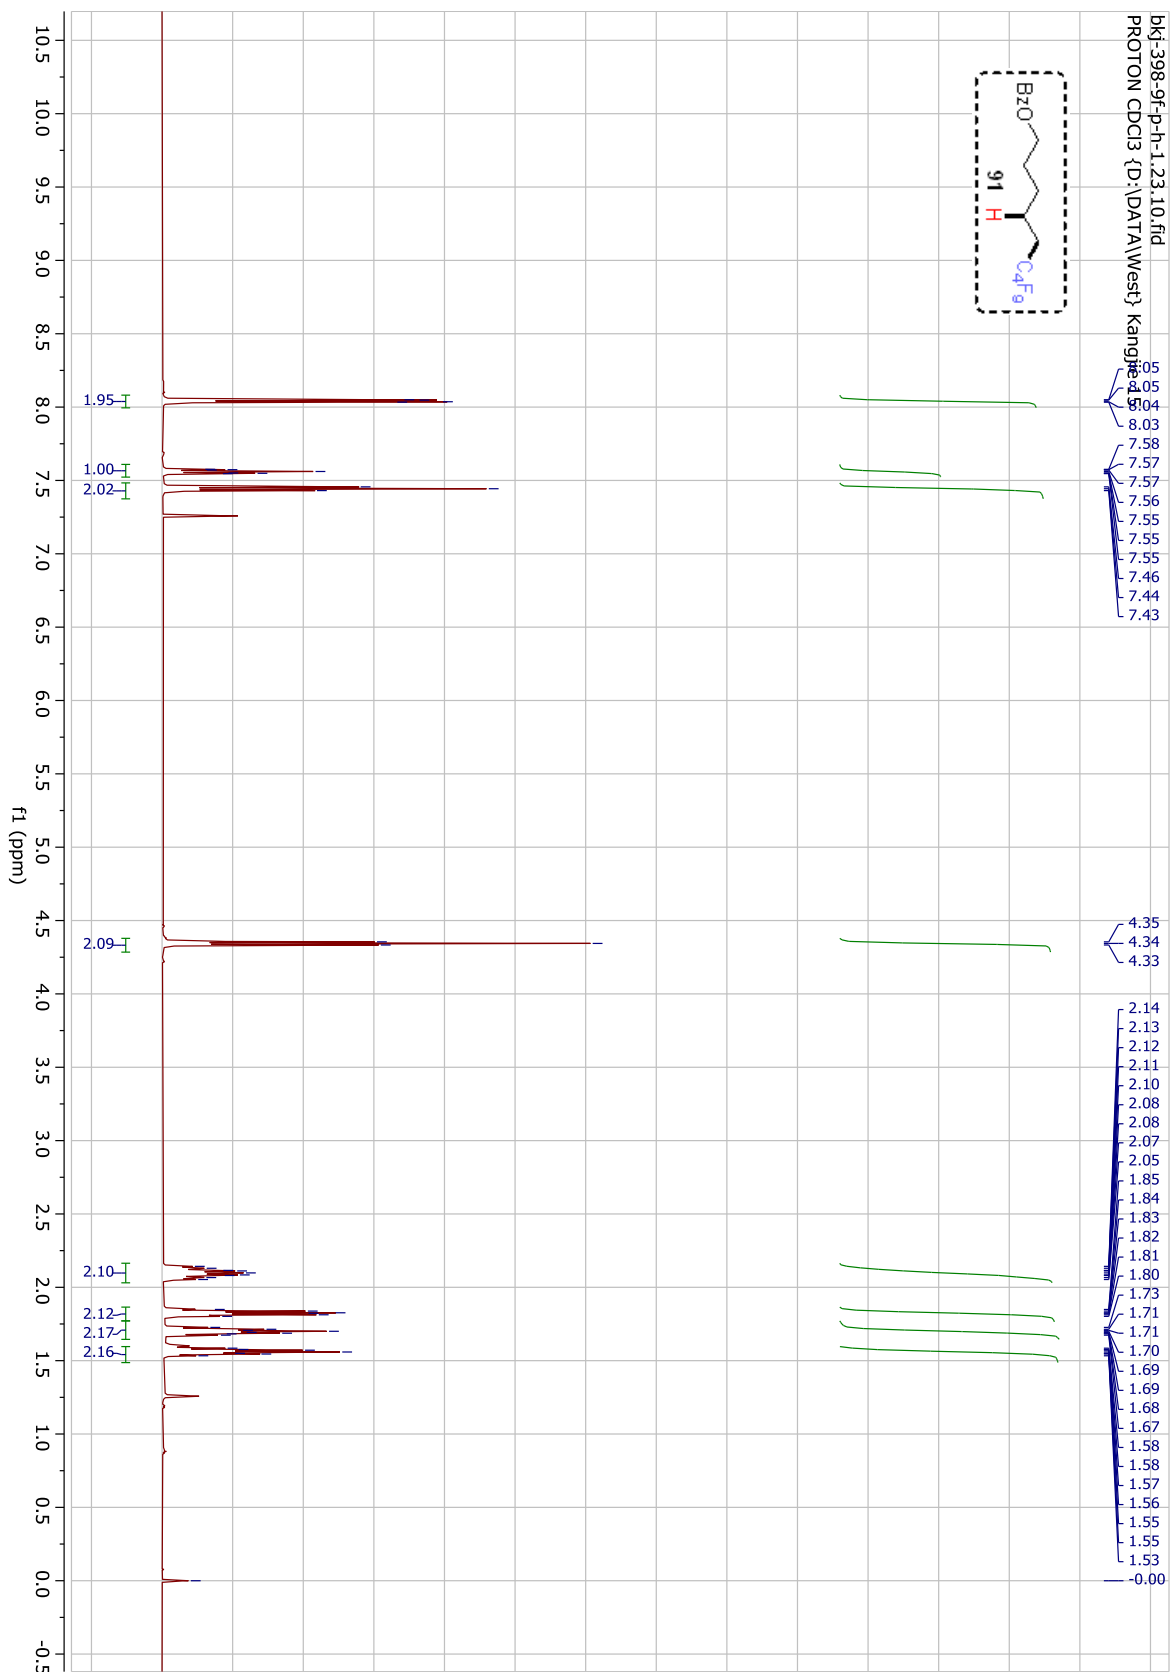

bk1-398-9f-p-c-1.26.10.fid  
C13CPD CDCl3 (D:\DATA\Westj Kanji)\822

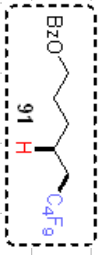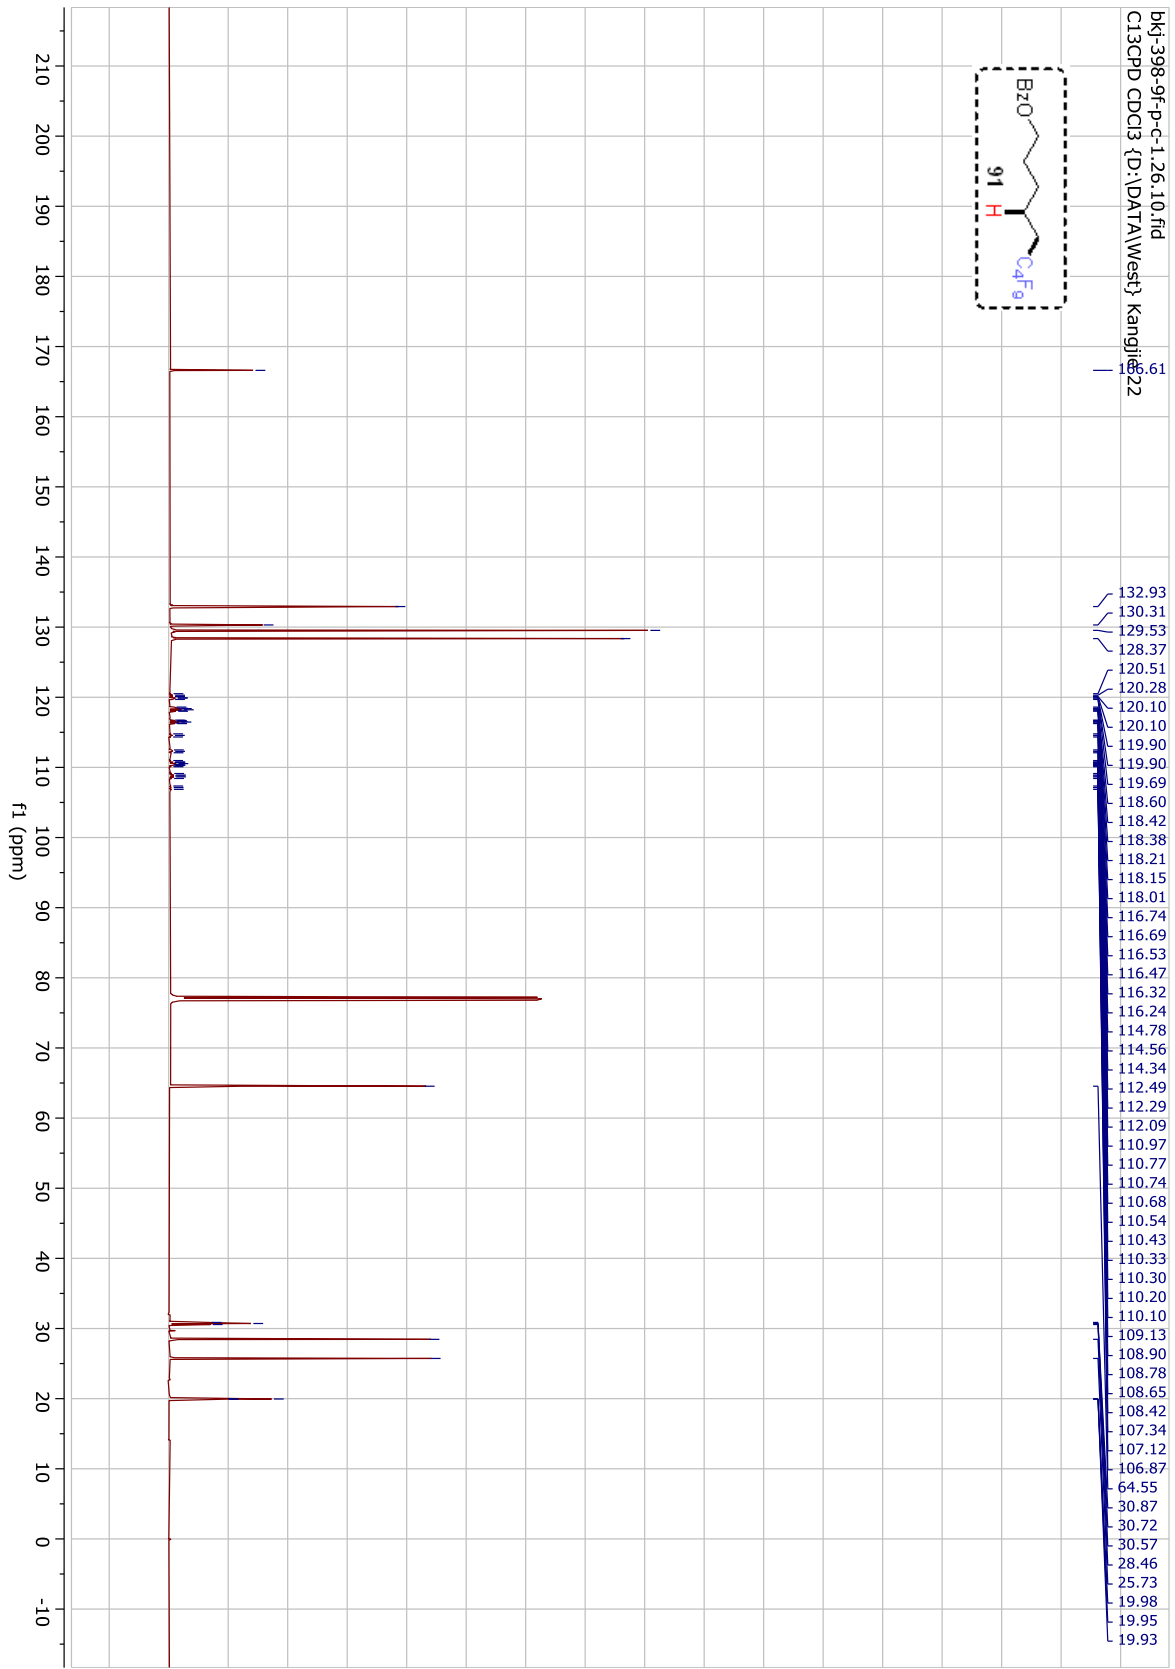

bkj-398-9f-p-h-1.23.11.fid  
F19\_baseline\_correct 1D  
F19\_baseline\_correct CDCl3 {D:\DATA\West\ Kangjie 15

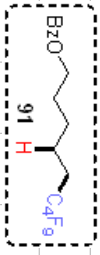

-81.07  
-81.07  
-81.09  
-81.11  
-81.12

-114.55  
-114.58  
-114.61  
-114.64  
-114.68  
-124.49  
-124.51  
-126.03  
-126.04  
-126.05  
-126.07  
-126.08  
-126.10  
-126.10  
-126.11

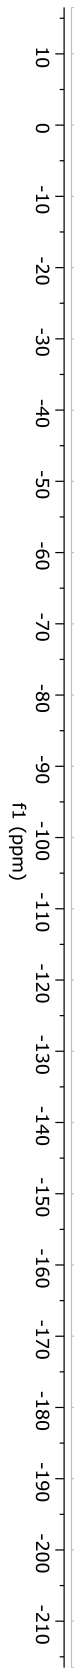

350

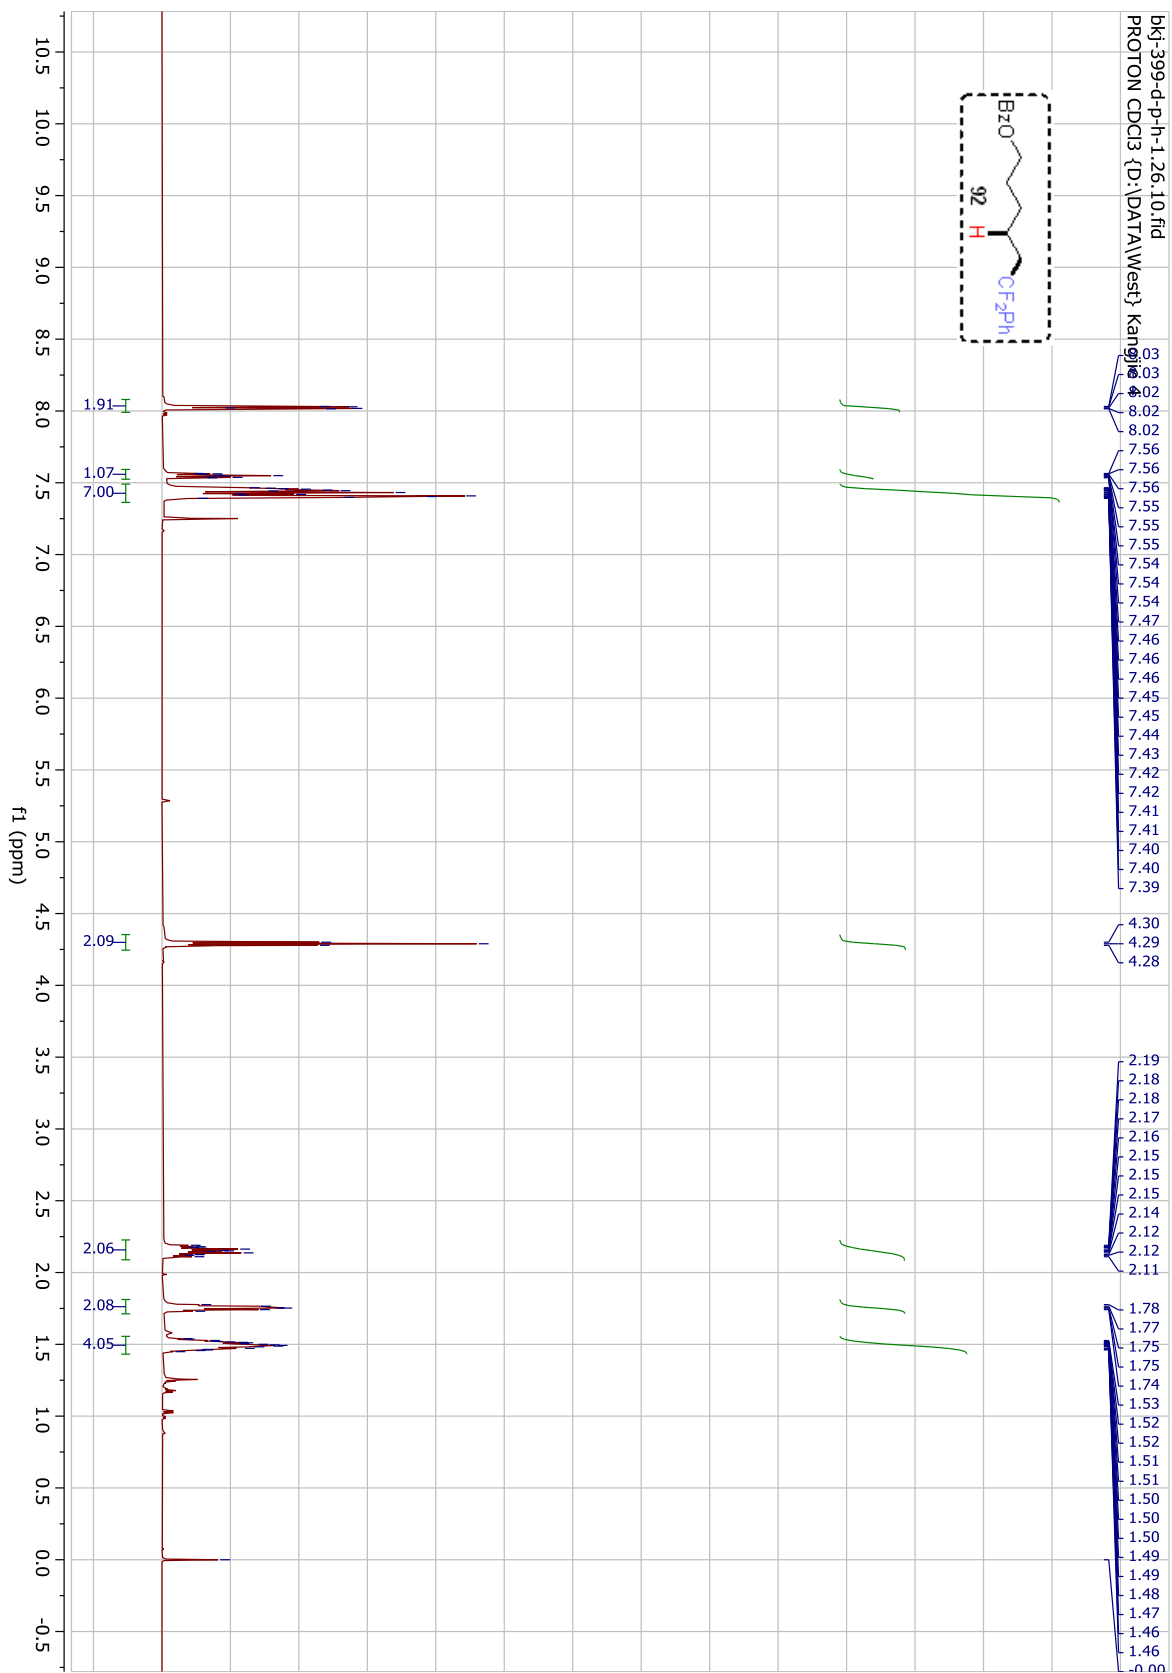

bkj-399-d-p-c-2-1.1.fid  
C13CPD CDCl3 {E:\DATA\_West\} Kanigie 2

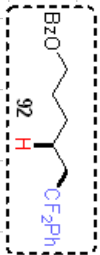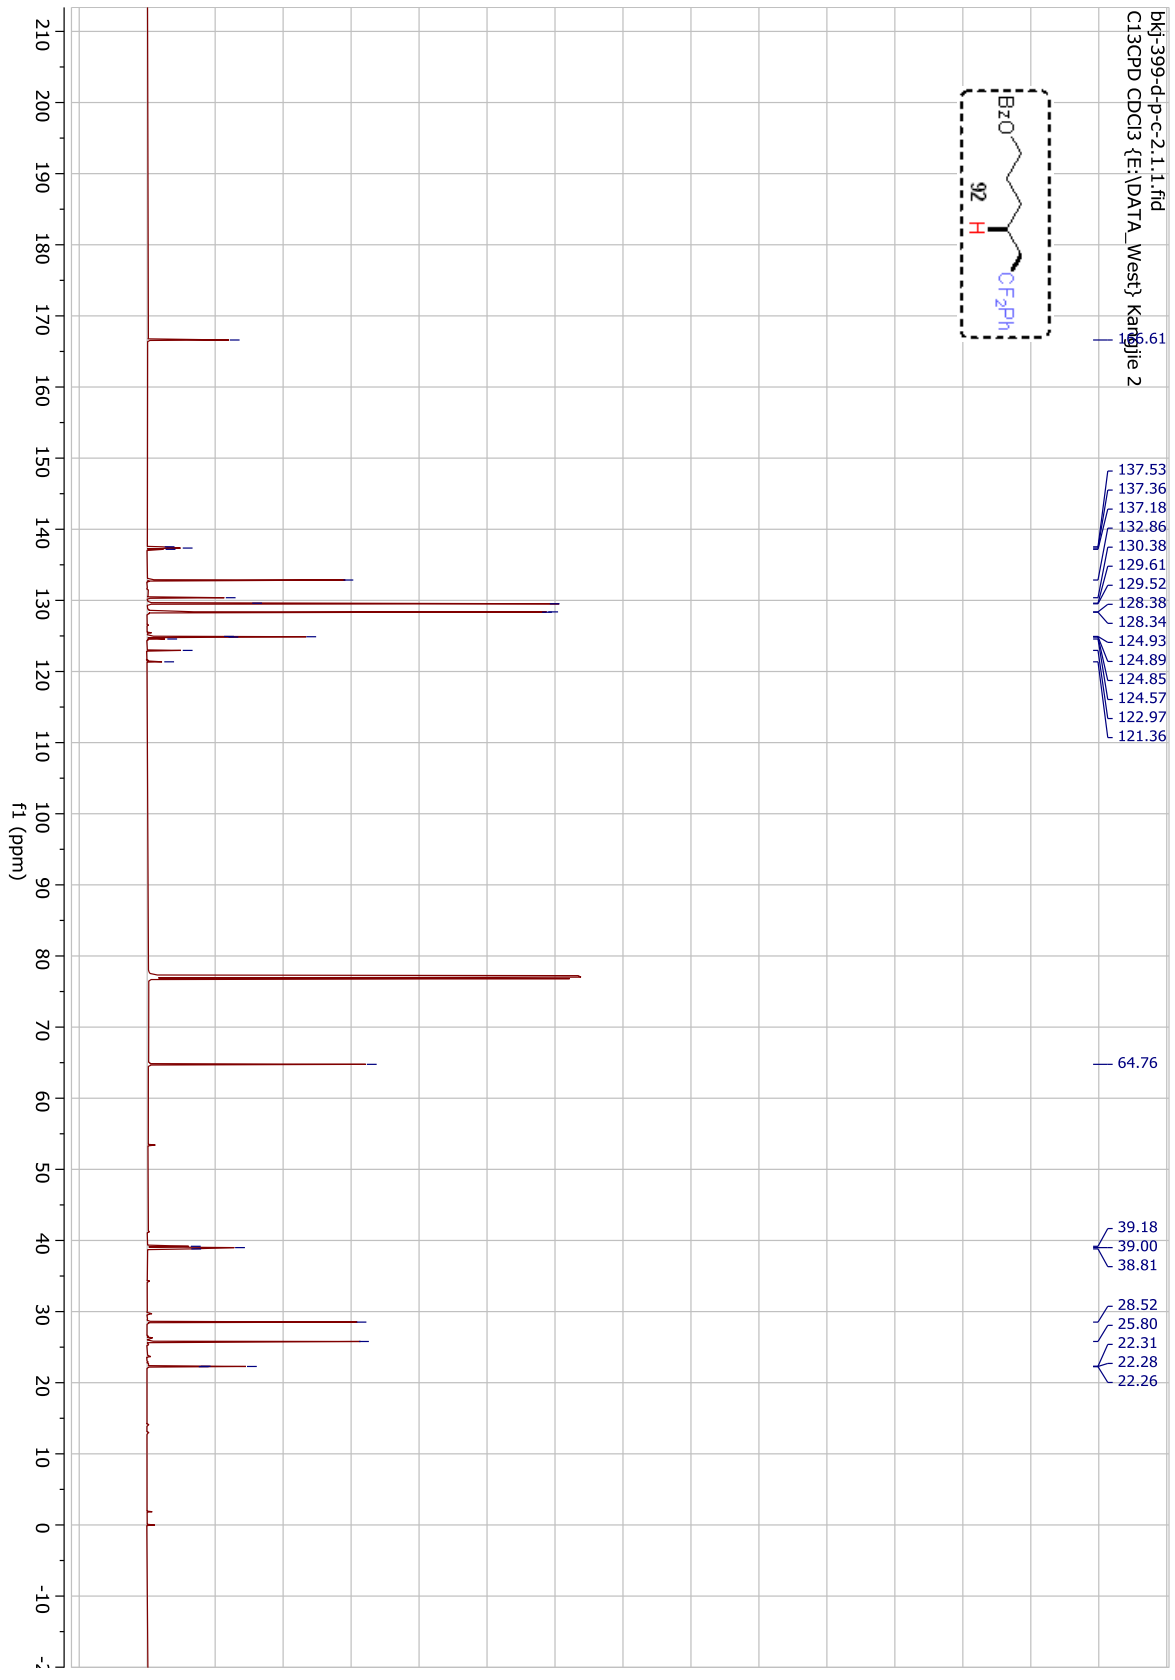

bkj-399-d-p-h-1.26.11.fid  
F19\_baseline\_correct ID  
F19\_baseline\_correct CDC13 {D:\DATA\West} Kangjie 4

-95.48  
-95.51  
-95.54

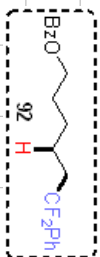



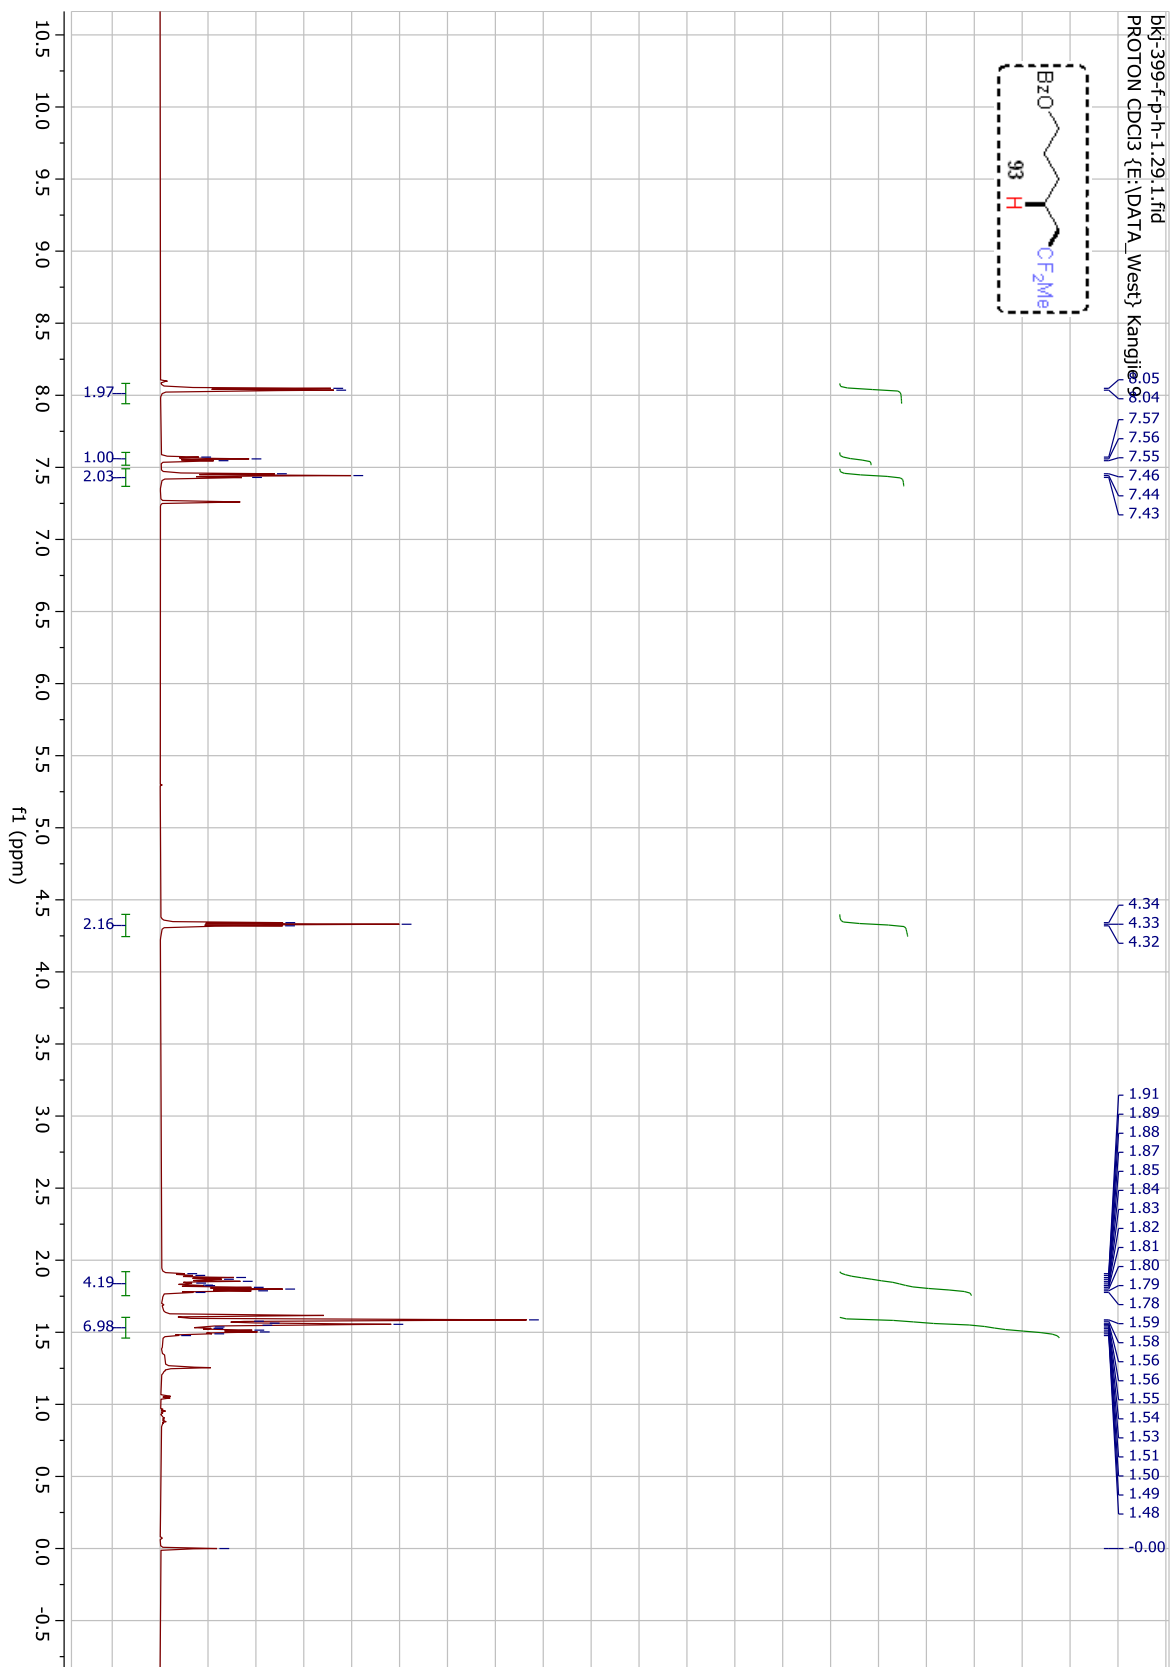

bkt-399-f-p-c-1.30.1.fid  
C13CPD CDCl3 (D:\DATA\Westj Kanji)\822

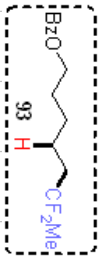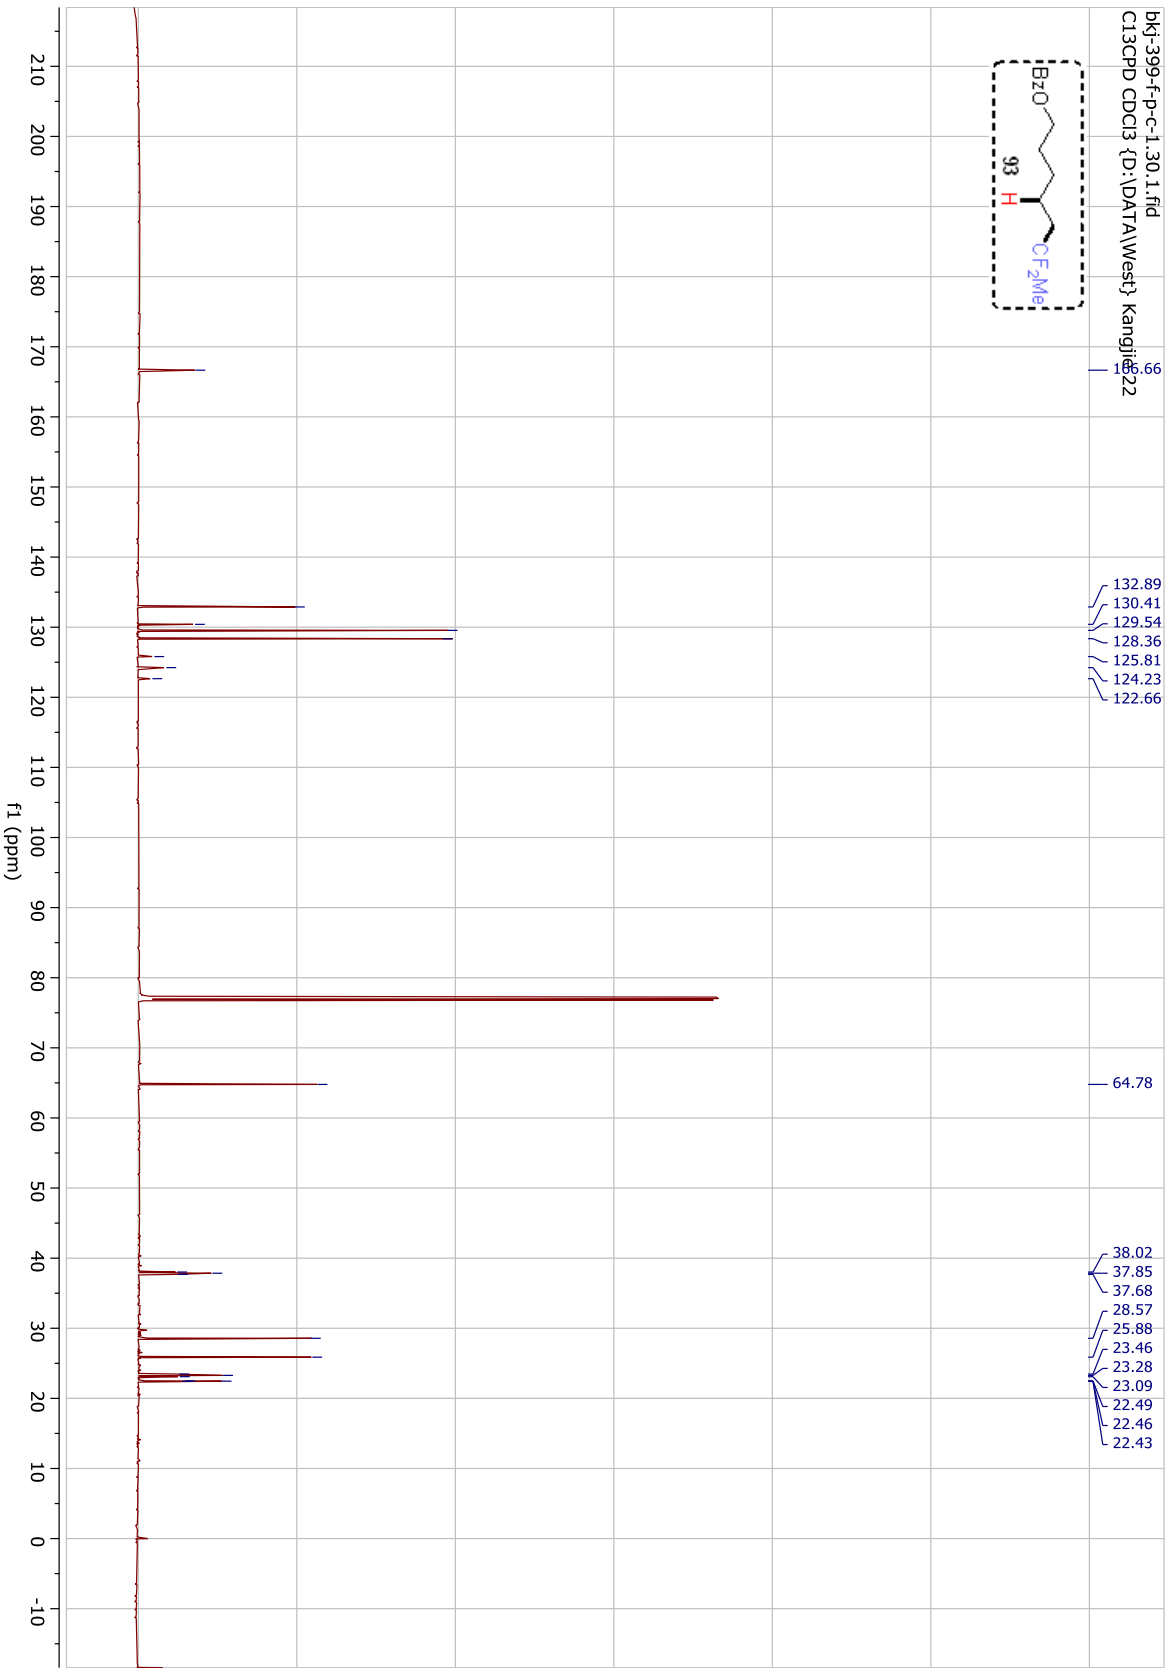

bkt-399-f-p-f1.30.1.fid  
F19 CDCl3 {D:\DATA\West}\Kangjie 22

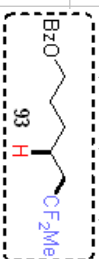

-90.55  
-90.58  
-90.61  
-90.64

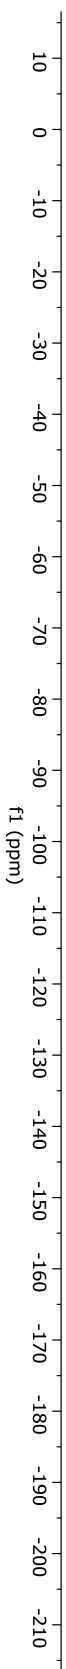

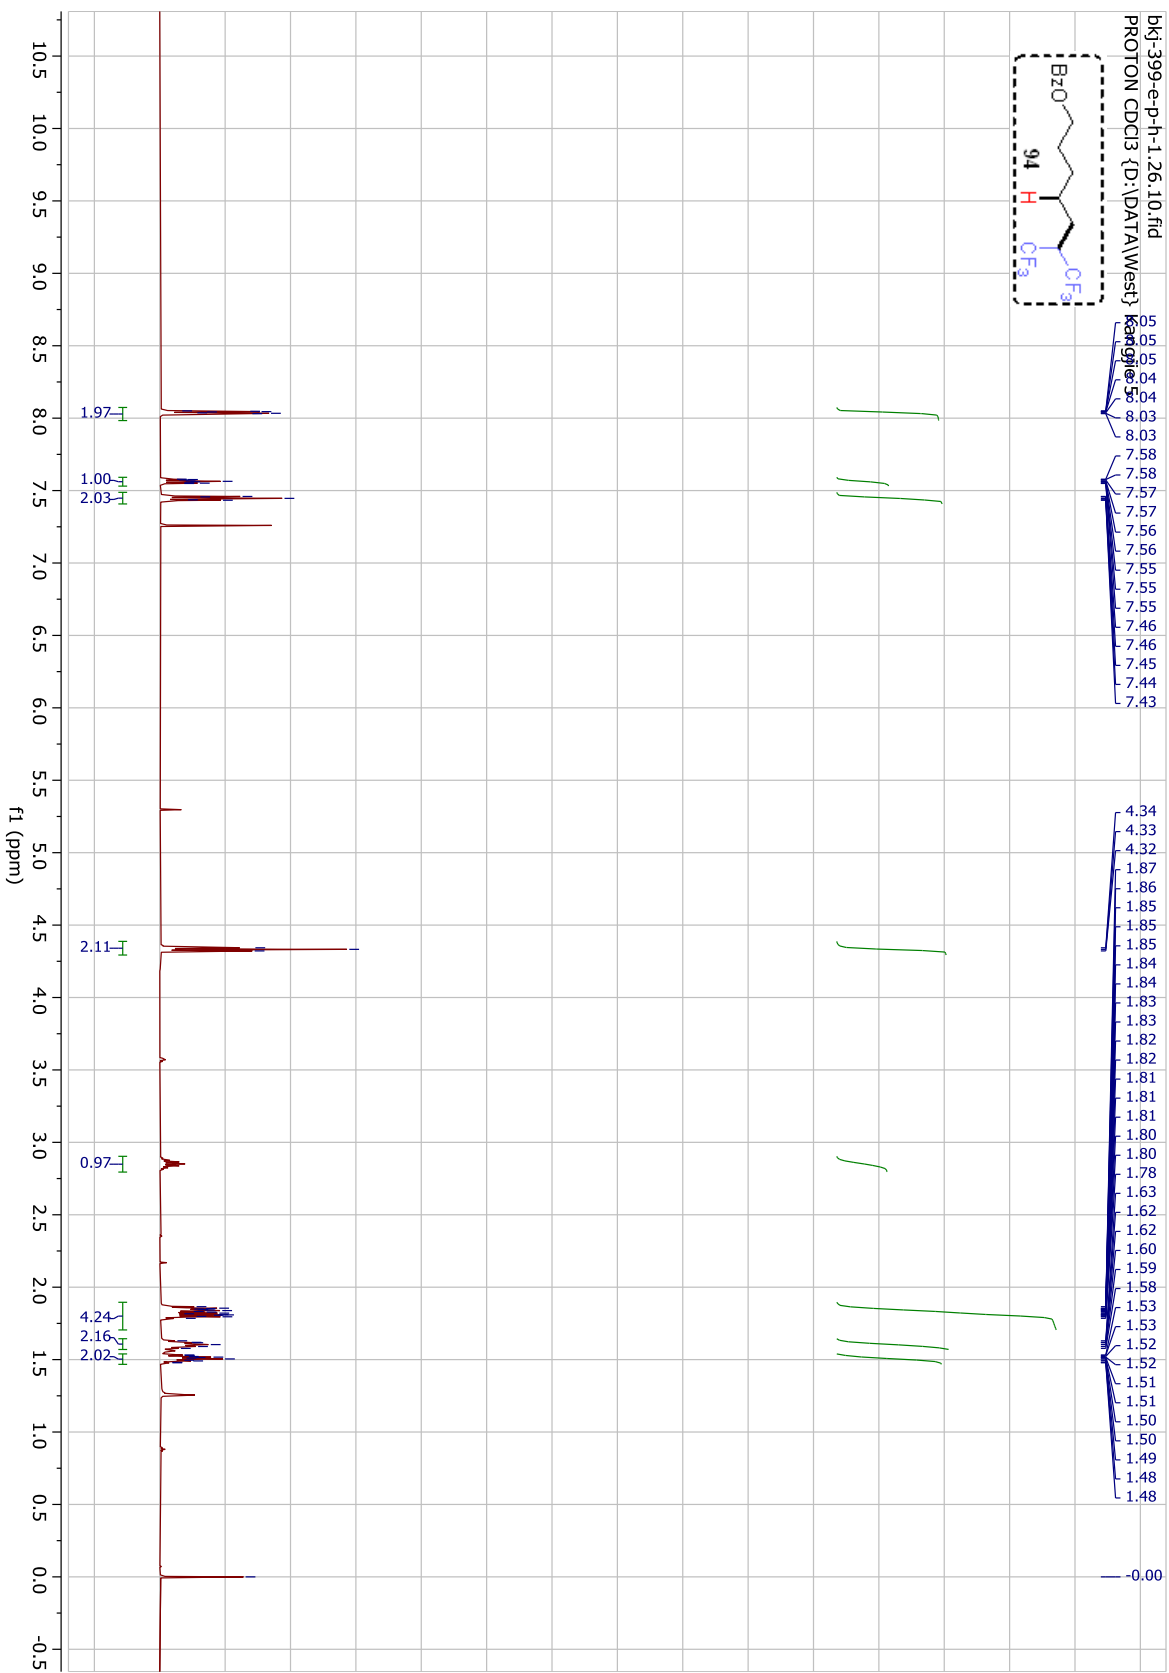

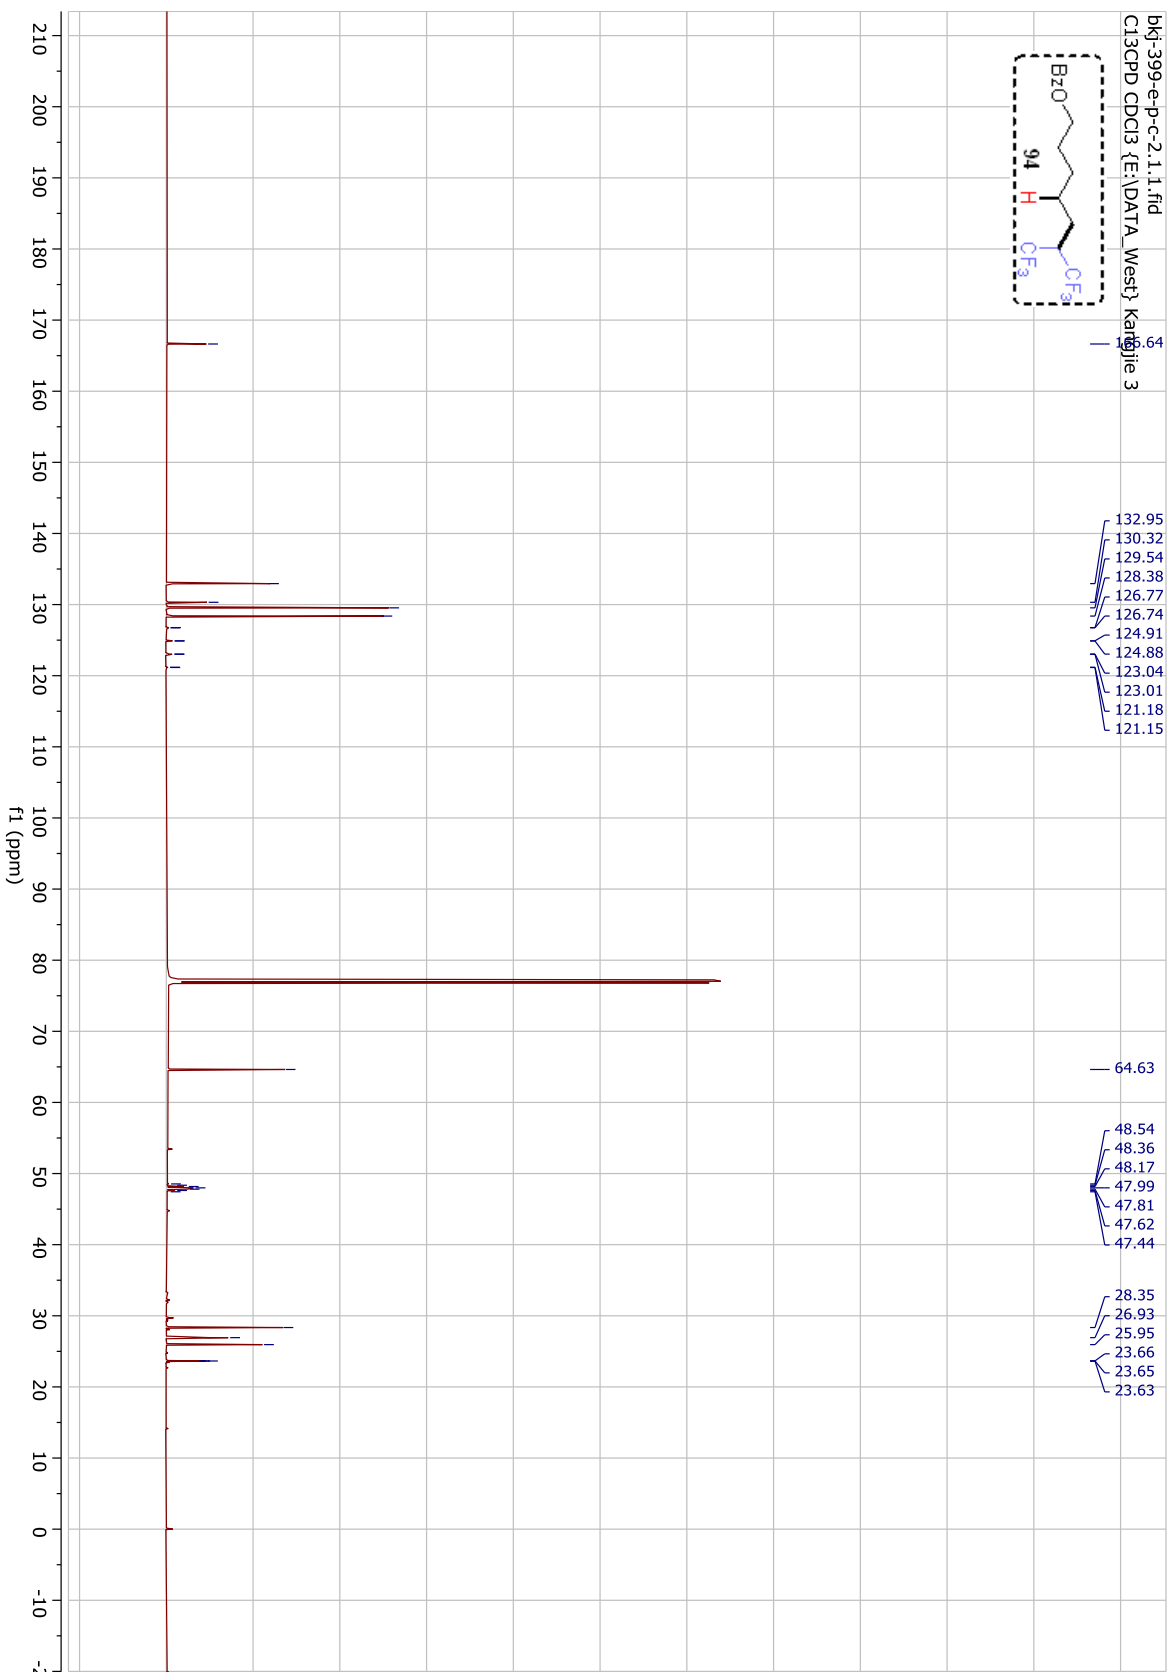

bkj-399-e-p-h-1.26.11.fid  
F19\_baseline\_correct ID  
F:\baseline\_correct\11712\DATA\West\Kangjie 5

-67.05  
-67.06

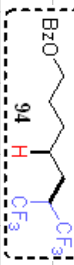

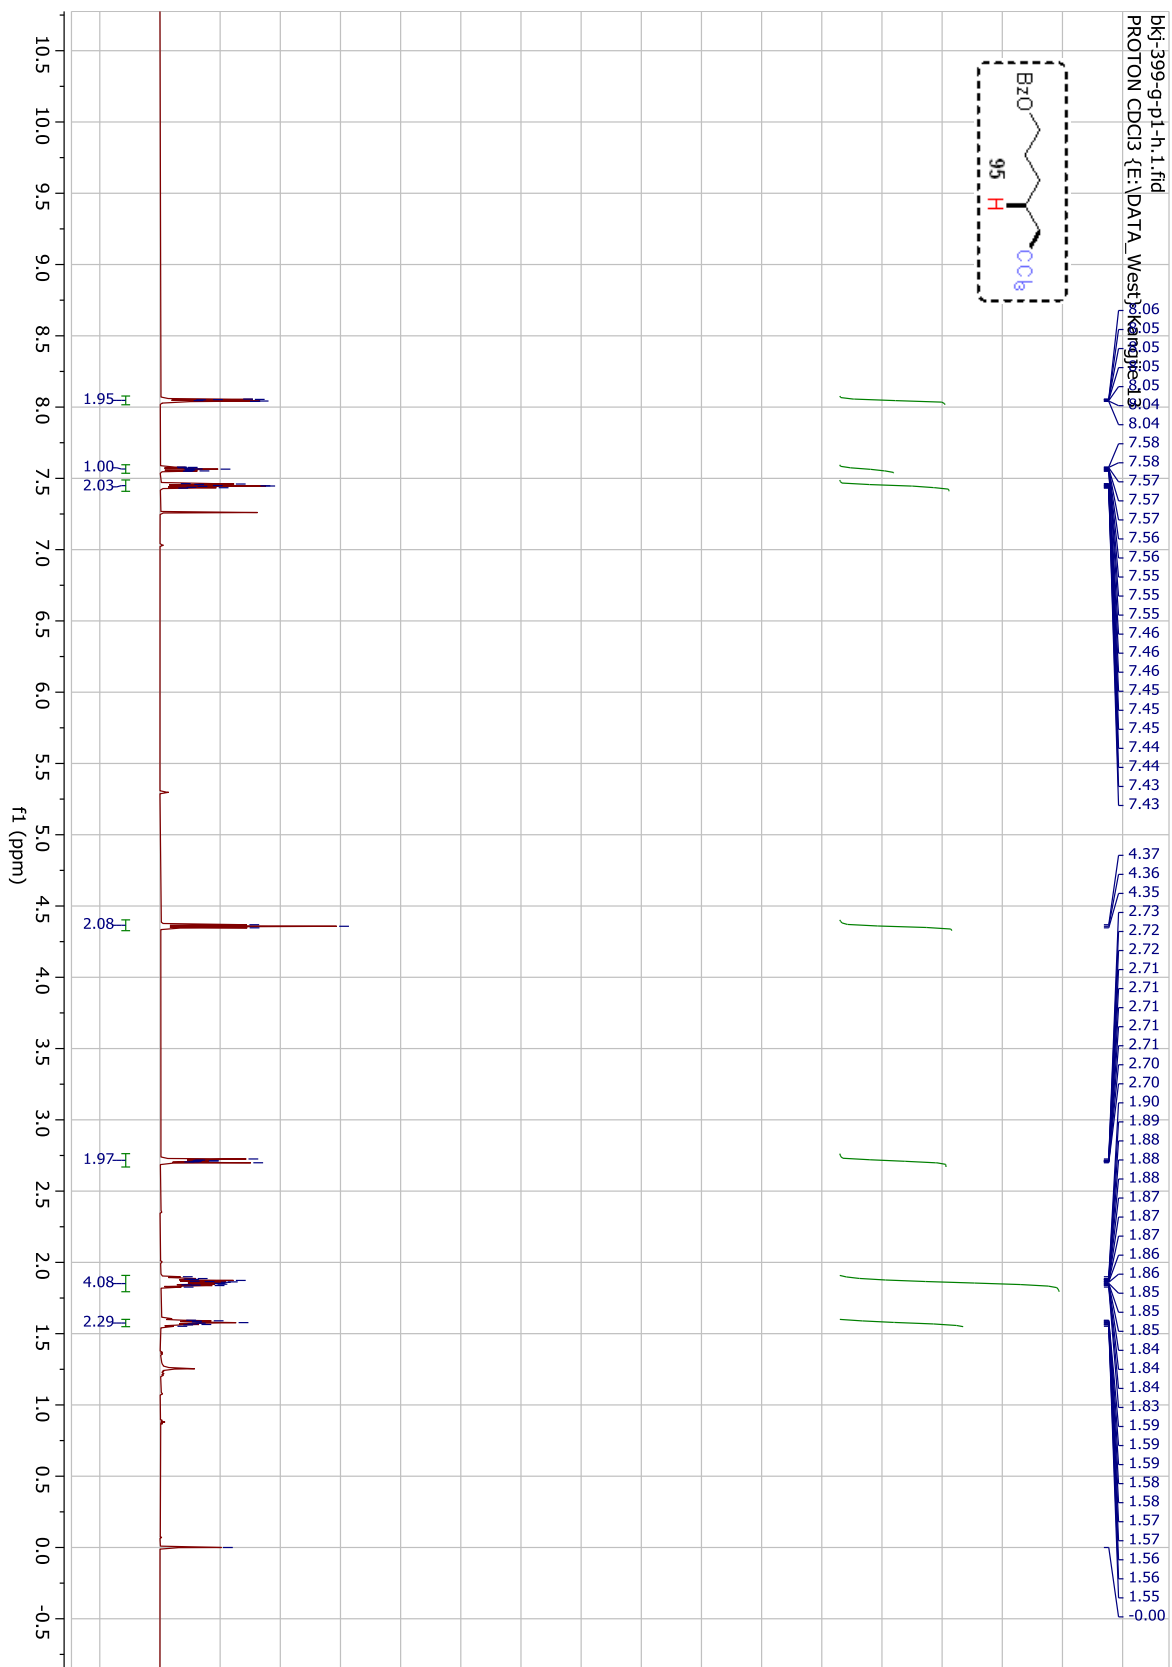

bkt-399-g-p1-2-9.10.fid  
C13CPD CDCl3 (D:\DATA\Westj Kanji)

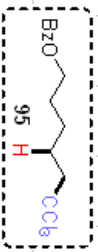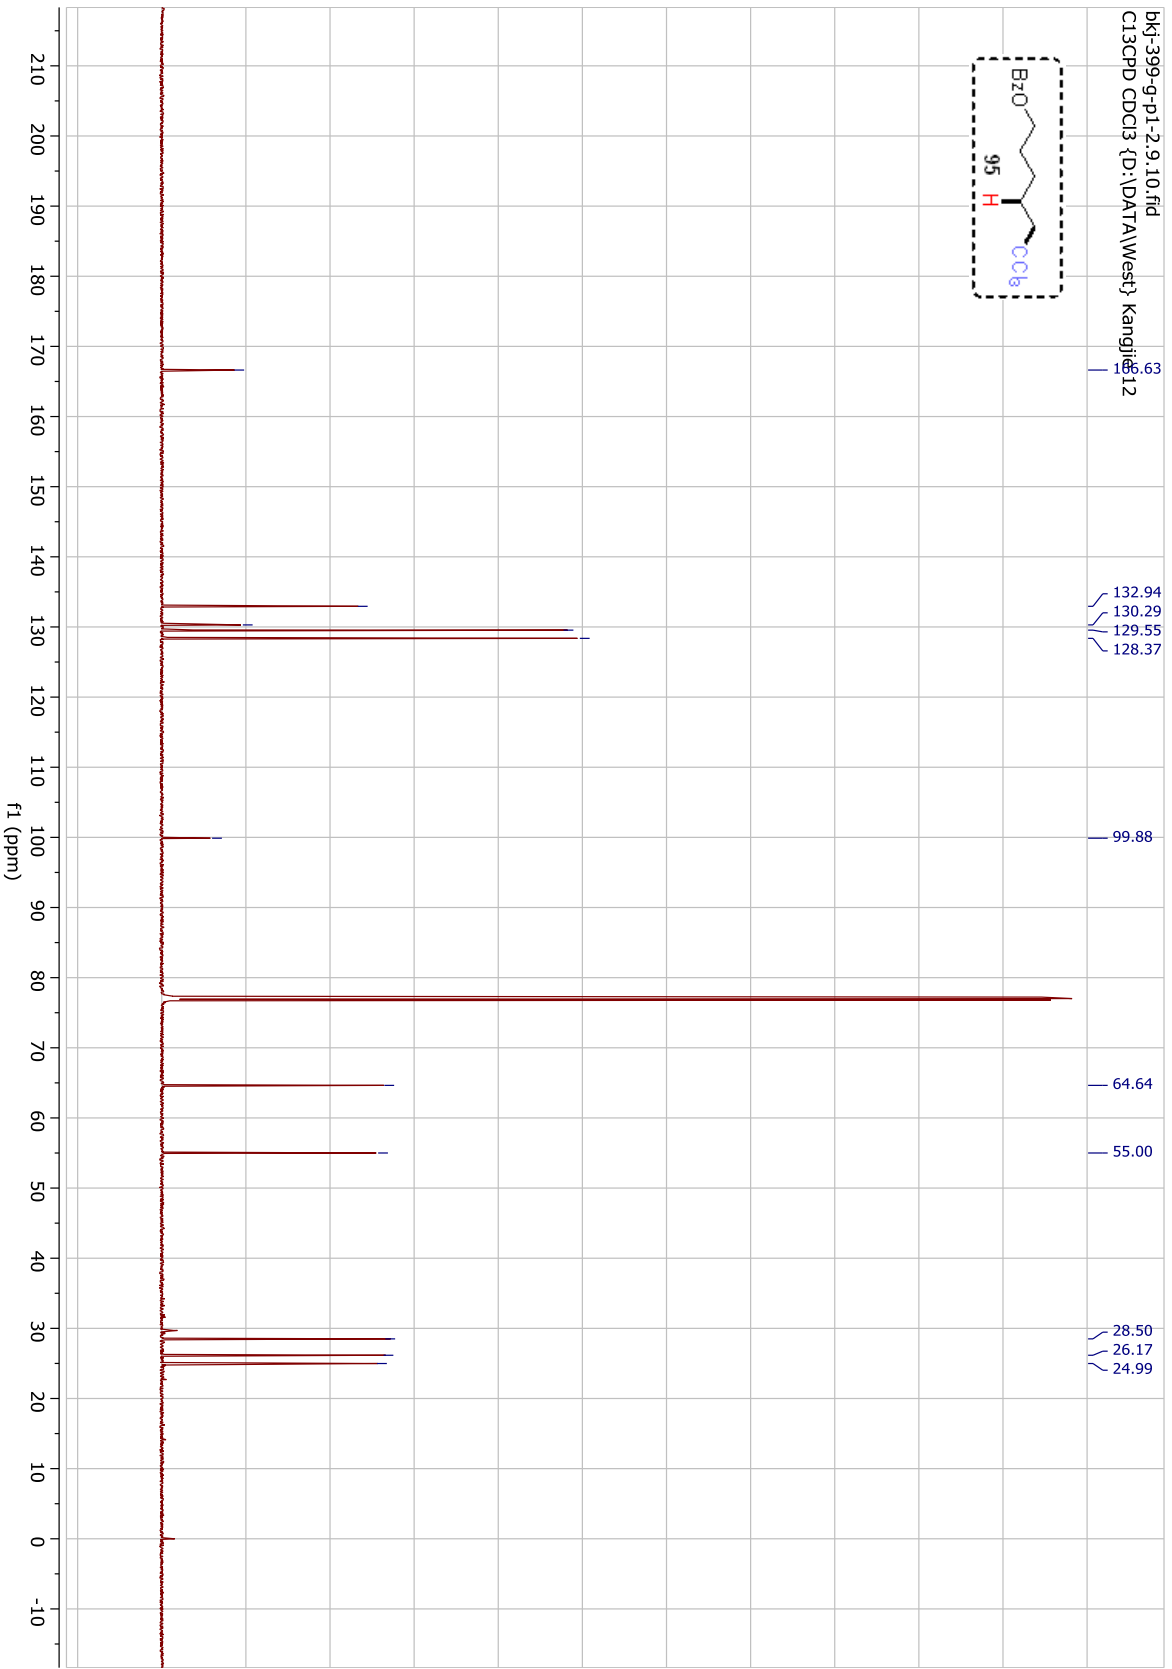





YC6-087-pure1.1.fid  
C13CPD32 CDCl3 {D:\DATA\West}\Yen-Chu 2

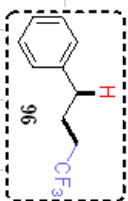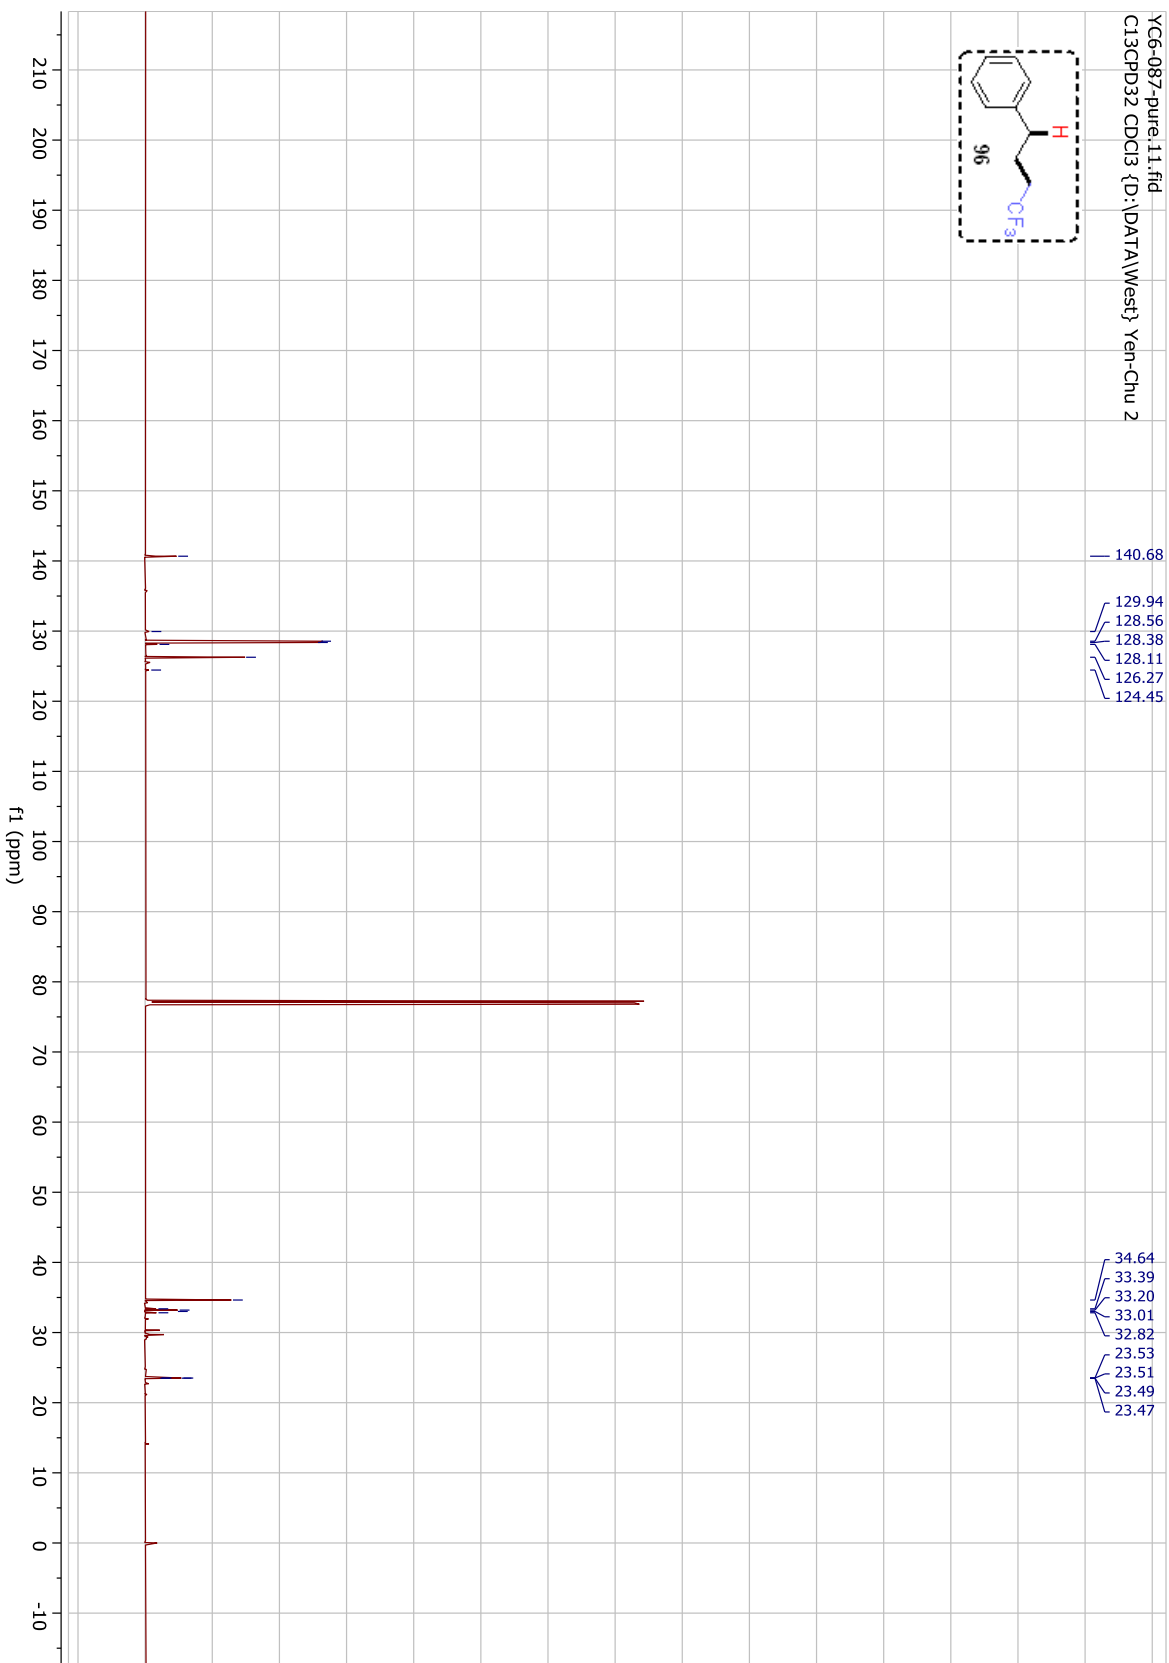

YCG-087-pure.12.fid 91.89 92.02  
F19\_baseline\_correct 80.89  
F19\_baseline\_correct CDCl3 {D:\DATA\West\ Yen-Chu 2

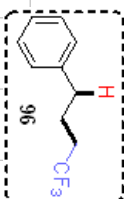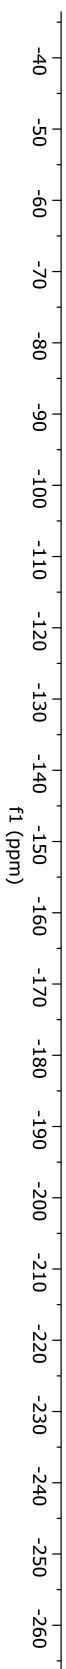

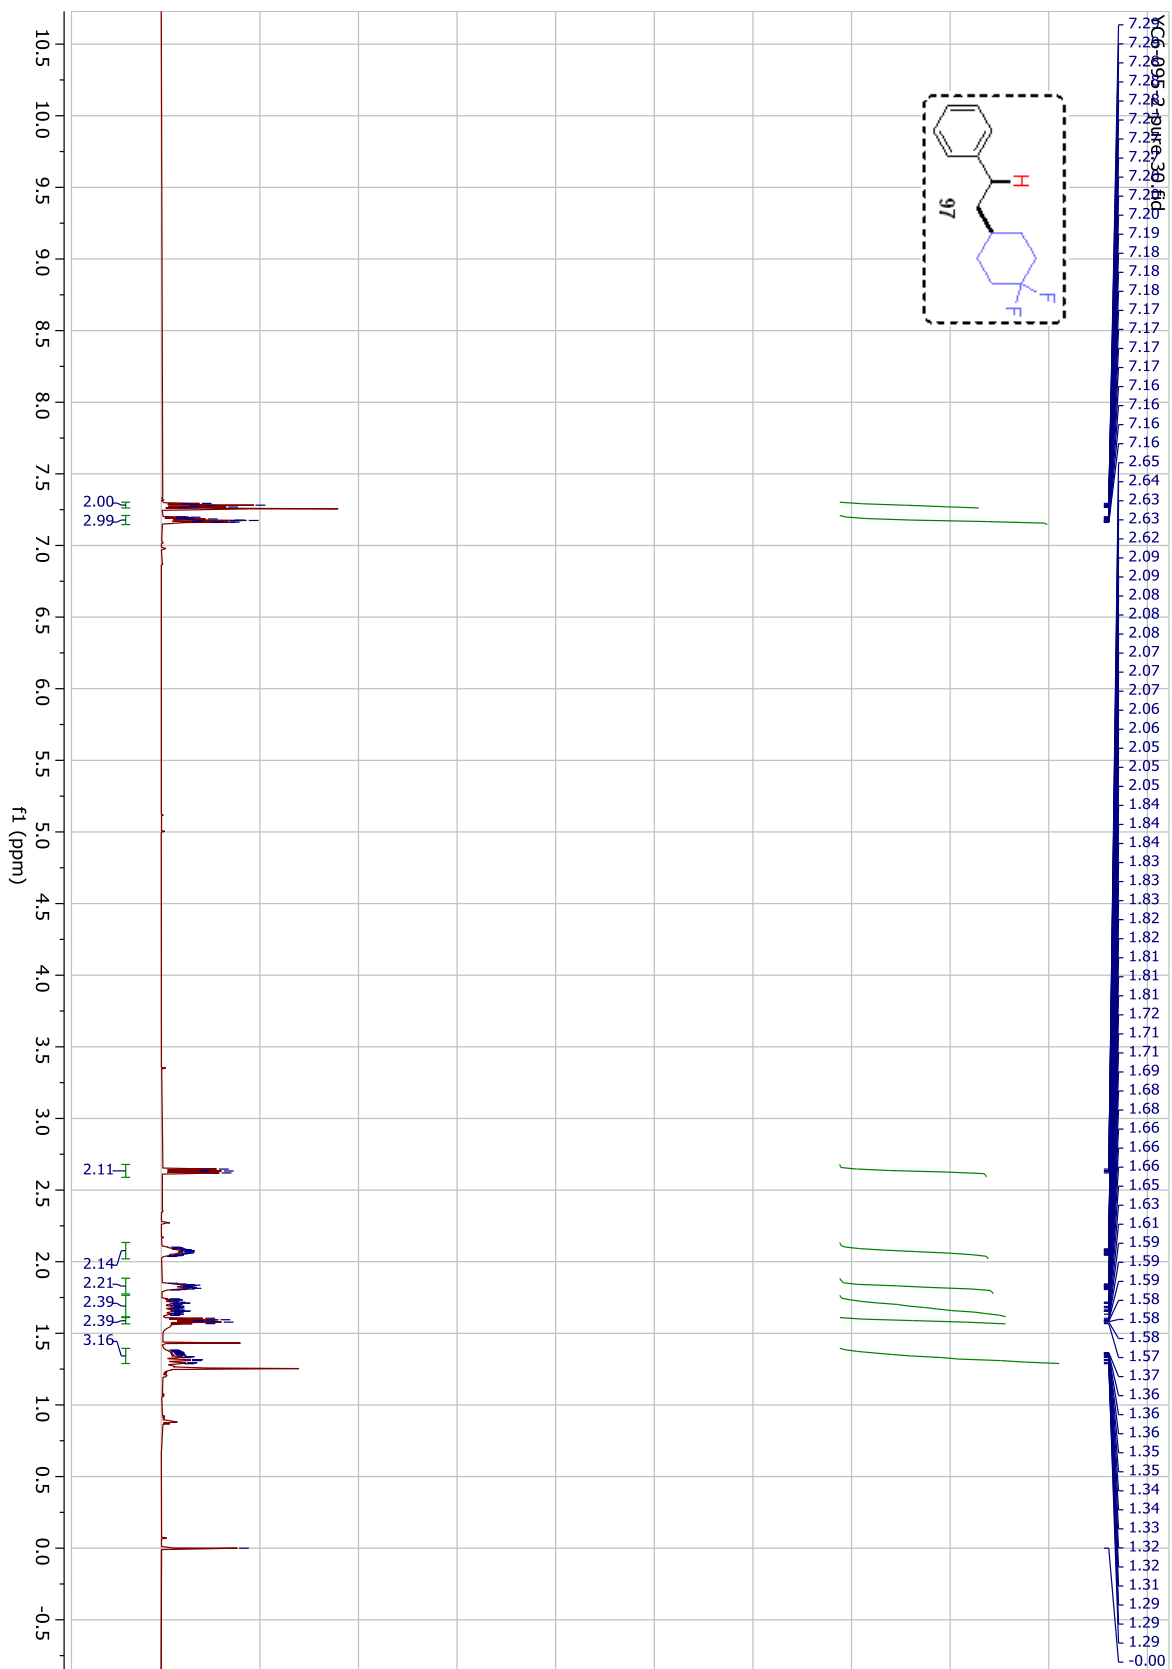

YC6-095-2-pure\_31.fid  
C13CPD32 CDCl3 {D:\DATA\West\} Yen-Chu 2

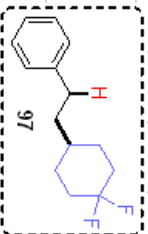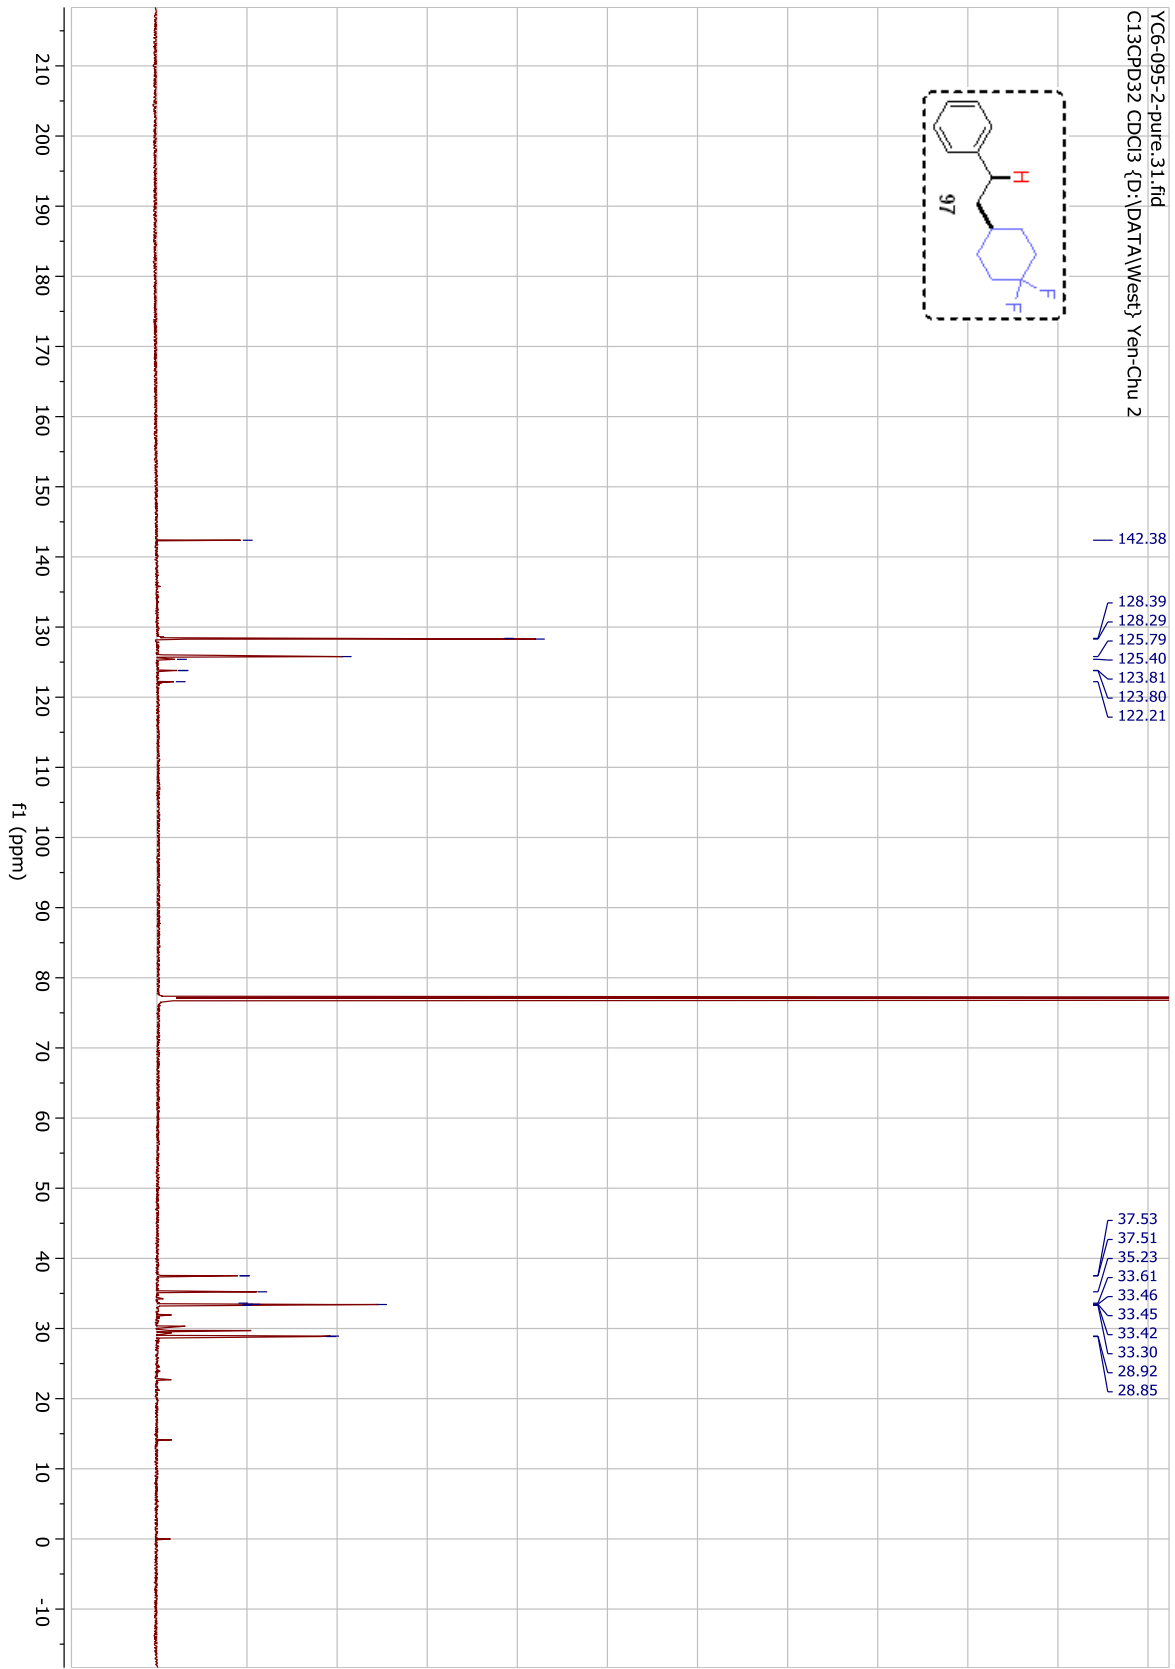

YC6-095-2-pure.33.fid  
F19\_baseline\_correct 1D  
F19\_baseline\_correct CDC13 {D:\DATA\West\} Yen-Chu 2

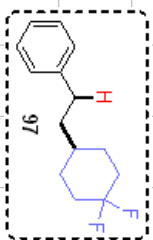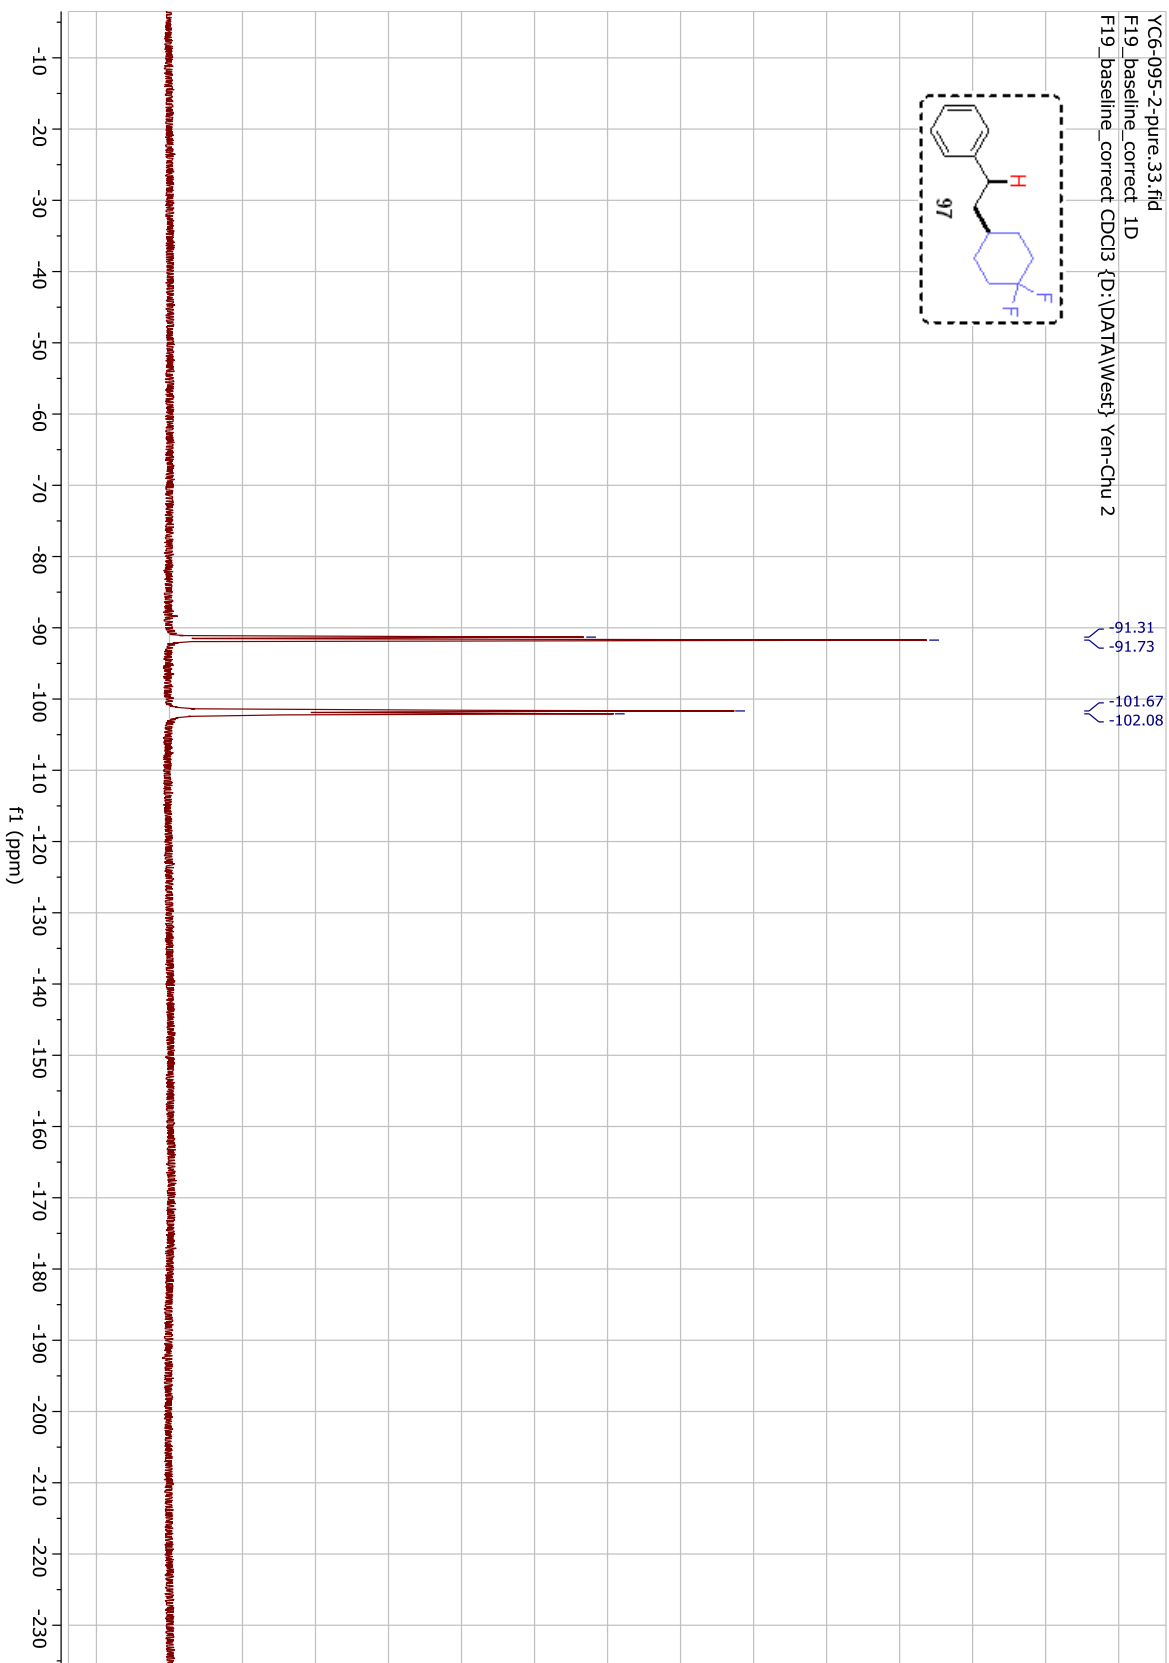

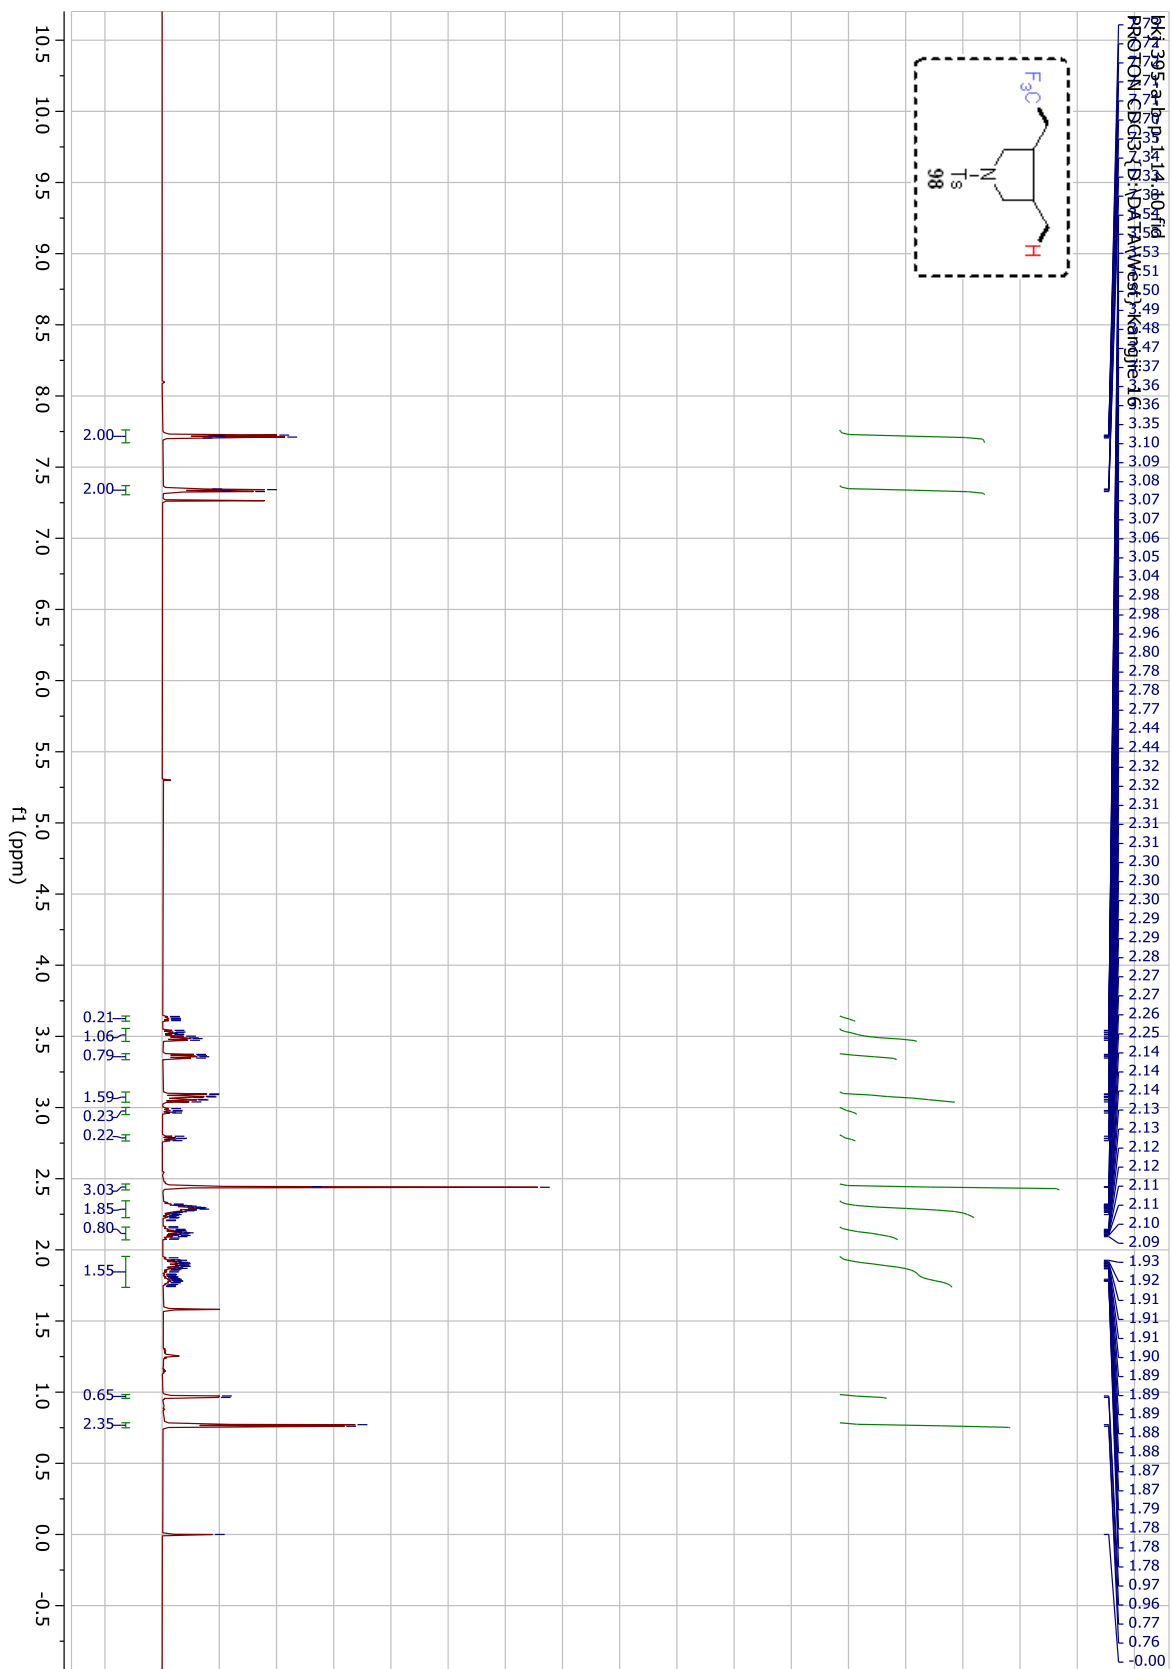

hkl-395-a-b-p-1-14.12.fid  
C13CPD CDCl3 (D:\DATA\Westj Kangjie 16

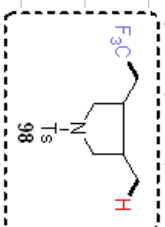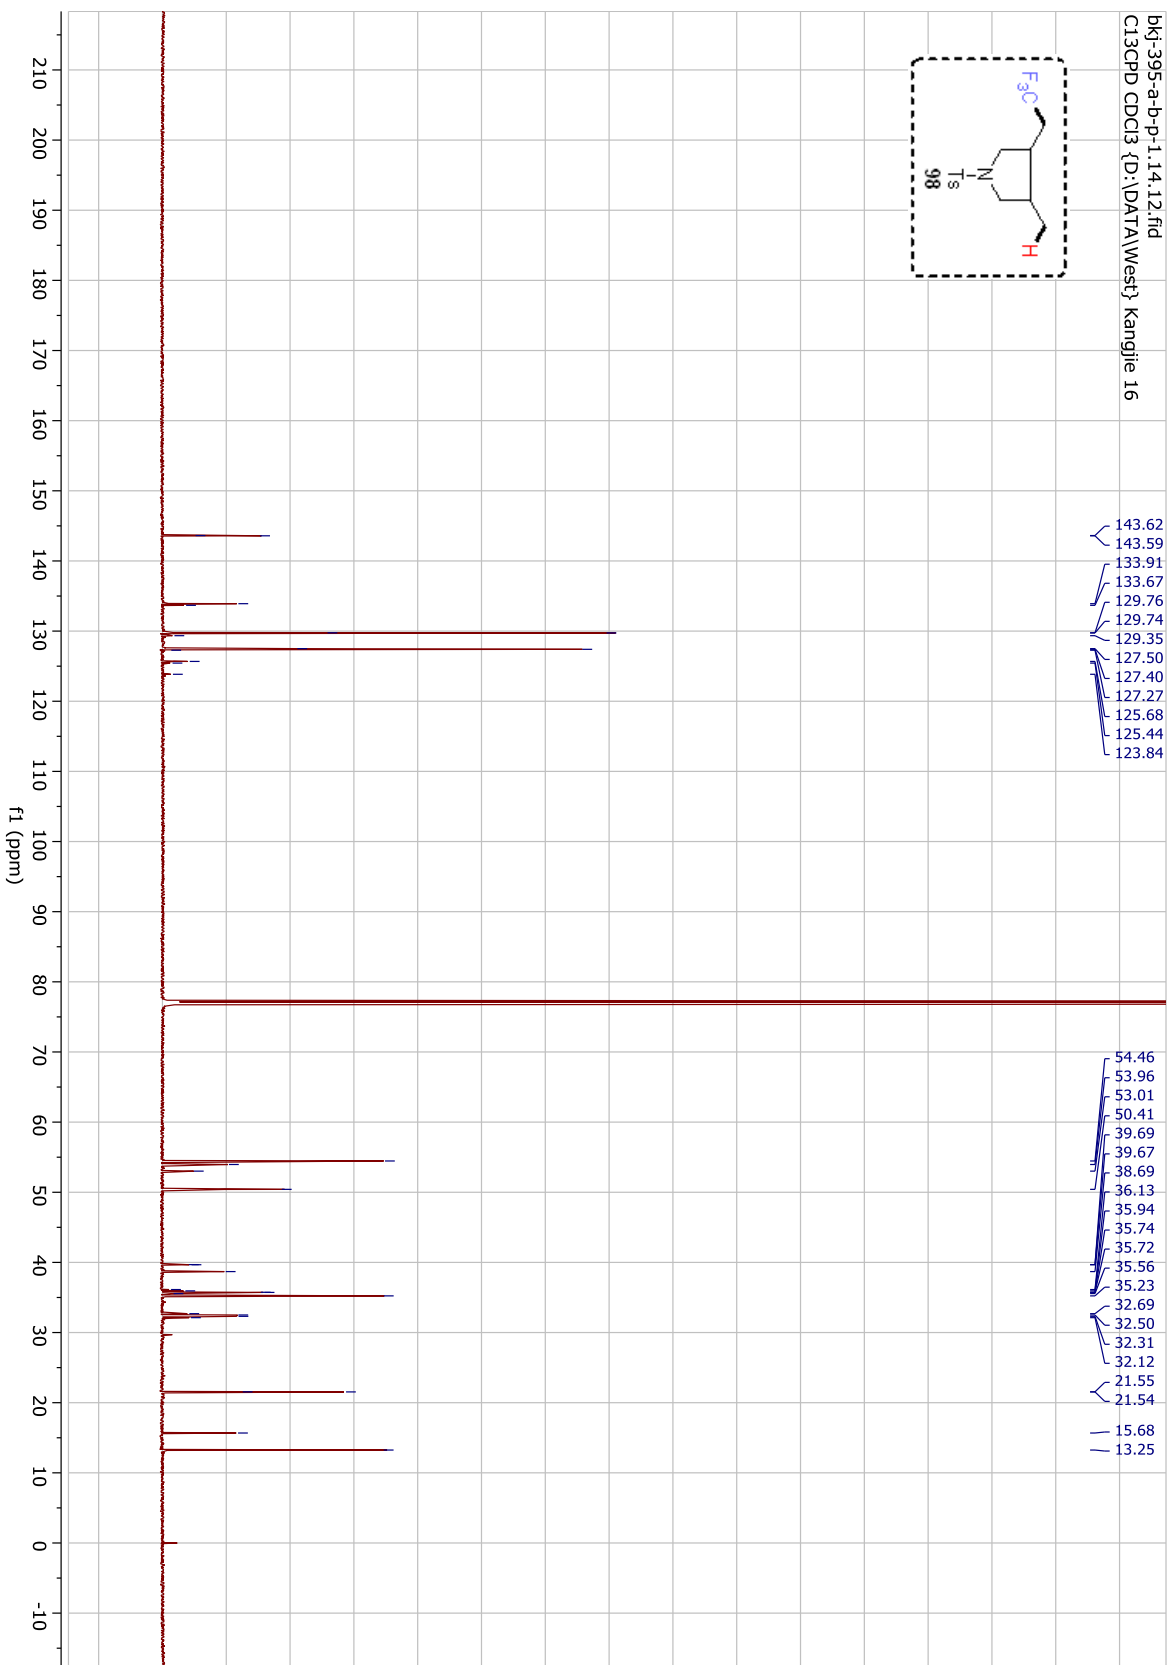



bkj-395-a-b-p-1.14.11.fid  
F19\_baseline\_correct ID  
F19\_baseline\_correct CDCI3 {D:\DATA\West} Kangjie 16

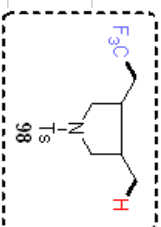

64.97  
64.99  
65.01  
65.03  
65.05



bk1-395-c-a-p-h-1.19.11.fid  
PROTON CDCl3 {D:\DATA\Westf\ Kangjie 6

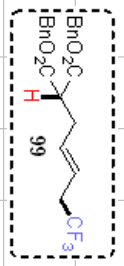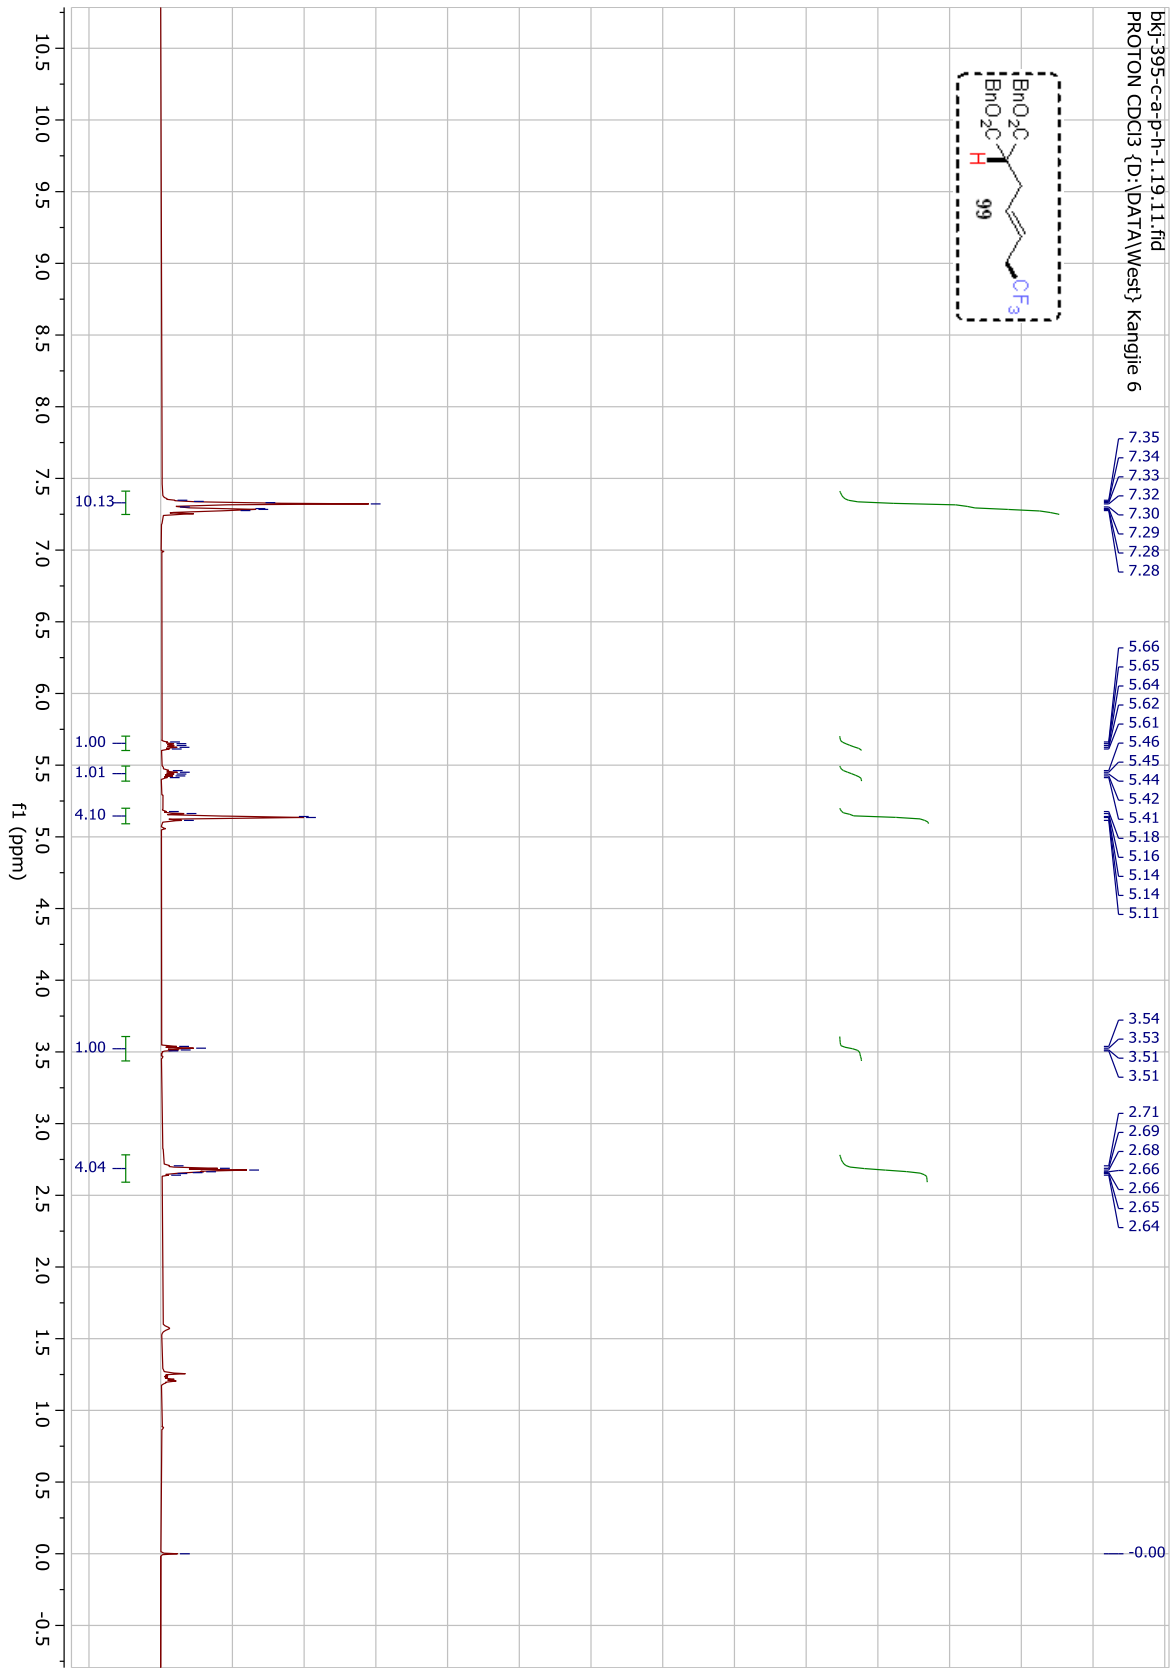

bjl-395-c-a-p-c-1.19.11.fid  
C13CPD CDCl3 (D:\DATA\Westj\_Kang) 6

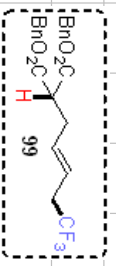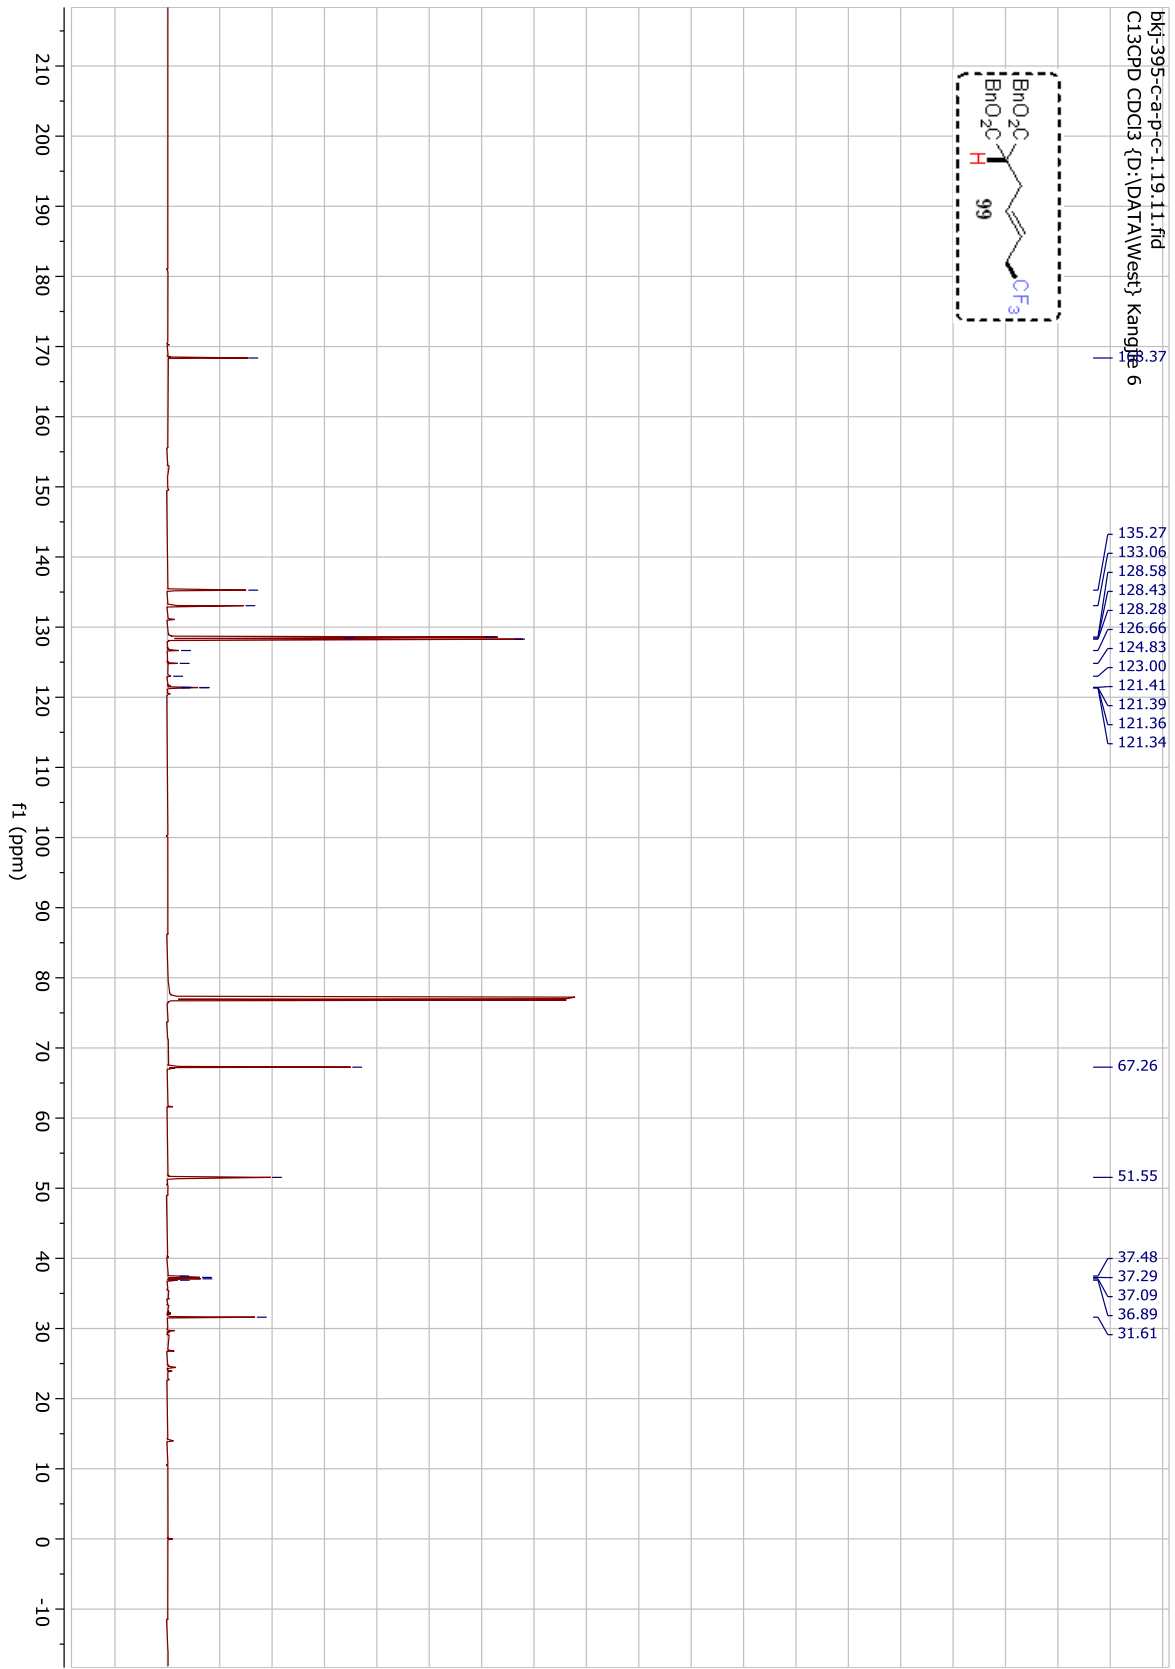

bkj-395-c-a-p-f-1.19.11.ftd  
F19\_baseline\_correct CDCl3 {D:\DATA\Westfj Kangjie 6

66.49  
66.51  
66.53

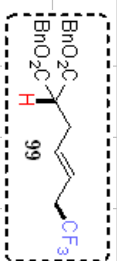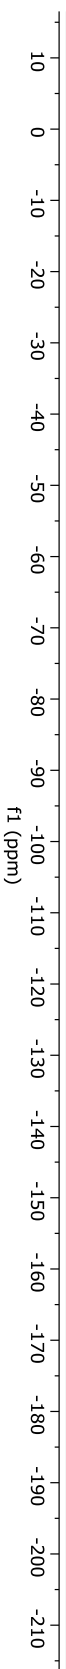

## IV. Supplemental Reference

- [1] Nikitas, N. F.; Voutyritsa, E.; Gkizis, P. L.; Kokotos, C. G. *Eur. J. Org. Chem.* **2021**, 2021, 96.
- [2] Liu, J.; Lu, C.; Wu, S.; Wu, X.; Wu, Z.; Xue, X.-S.; Yu, J.; Zhu, C. *Angew. Chem. Int. Ed.* **2020**, 59, 8195.
- [3] Jiang, H.-J.; Liu, K.; Yu, J.; Zhang, L.; Gong, L.-Z. *Angew. Chem. Int. Ed.* **2017**, 56, 11931.
- [4] C. Almansa, J. Alfón, A. F. de Arriba, F. L. Cavalcanti, I. Escamilla, L. A. Gómez, et al. *J. Med. Chem.* **2003**, 46, 3463.
- [5] Aldrich, C.; Brody, S.; Cushman, M.; Fan, B.-Z.; Hiasa, H.; Liang, J.-H.; Lv, W.; Yang, Z.-Y. *Eur. J. Med. Chem.* **2020**, 193, 112222.
- [6] Egami, H.; Usui Y.; Kawamura, S.; Nagashima, S.; Sodeoka, M. *Chem. Asian J.* **2015**, 10, 2190.
- [7] Paeth, M.; Tyndall, S. B.; Chen, L.-Y.; Hong, J.-C.; Carson, W. P.; Liu, X.; Sun, X.; Liu, J.; Yang, K.; Hale, E. M.; et al. *J. Am. Chem. Soc.* **2019**, 141 (7), 3153.
- [8] Zhang, W.; Zou, Z.; Wang, Y.; Wang, Y.; Liang, Y.; Wu, Z.; Zheng, Y.; Pan, Y. *Angew. Chem. Int. Ed.* **2017**, 58 (2), 624.
- [9] Shen, H.; Liu, Z.; Zhang, P.; Tan, X.; Zhang, Z.; Li, C. *J. Am. Chem. Soc.* **2017**, 139 (29), 9843.
- [10] Choi, G.; Lee, G. S.; Park, B.; Kim, D.; Hong, S. H. *Angew. Chem. Int. Ed.* **2021**, 60 (10), 5467.
- [11] Cui, B.; Sun, H.; Xu, Y.; Li, L.; Duan, L.; Li, Y.-M. *J. Org. Chem.* **2018**, 83 (11), 6015.
- [12] Yang, Y.-F.; Lin, J.-H.; Xiao, J.-C. *Org. Lett.* **2021**, 23 (23), 9277.
- [13] Zhao, H.; Lu, C.; Herbert, S.; Zhang, W.; Shen, Q. *J. Org. Chem.* **2021**, 86 (3), 2854.
- [14] Zhang, Z.-Q.; Sang, Y.-Q.; Wang, C.-Q.; Dai, P.; Xue, X.-S.; Piper, J. L.; Peng, Z.-H.; Ma, J.-A.; Zhang, F.-G.; Wu, J. *J. Am. Chem. Soc.* **2022**, 144 (31), 14288.
- [15] Hester, J. B.; Gibson, J. K.; Buchanan, L. V.; Cimini, M. G.; Clark, M. A.; Emmert, D. E.; Glavanovich, M. A.; Imbordino, R. J.; LeMay, R. J.; McMillan, M. W.; et al. *J. Med. Chem.* **2001**, 44 (7), 1099.
- [16] Lin, Q.-Y.; Xu, X.-H.; Zhang, K.; Qing, F.-L. *Angew. Chem. Int. Ed.* **2016**, 55 (4), 1479.
- [17] Xu, J.; Xiao, B.; Xie, C.-Q.; Luo, D.-F.; Liu, L.; Fu, Y. *Angew. Chem. Int. Ed.* **2012**, 51 (50), 12551.

- [18] Chandu, P.; Ghosh, K. G.; Das, D.; Sueshkumar, D. *Tetrahedron* **2019**, *75* (45), 130641.
- [19] Ref. 22 in the manuscript.
- [20] Amaral, G. A.; Ausfelder, F.; Izquierdo, J. G.; Rubio-Lago, L.; Bañares, L. *J. Chem. Phys.* **2007**, *126*, 024301.
- [21] Pryor, W. A.; Fuller, D. L.; Stanley, J. P. *J. Am. Chem. Soc.* **1972**, *94* (5), 1632.
- [22] Zepp, R. G.; Wagner, P. J. *J. Chem. Soc., Chem. Commun.* **1972**, 167b.
- [23] Ito, O. *Res. Chem. Intermed.* **1995**, *21*, 69.
- [24] Zheng, C.; Jiang, C.; Huang, S.; Zhao, K.; Fu, Y.; Ma, M.; Hong, J. *Org. Lett.* **2021**, *23* (17), 6982.
- [25] Li, Y.; Studer, A. *Angew. Chem. Int. Ed.* **2012**, *51* (33), 8221.
